# Supplementary material for: Derivedness Index for Estimating Degree of Phenotypic Evolution of Embryos: A Study of Comparative Transcriptomic Analyses of Chordates and Echinoderms
Source: Front Cell Dev Biol. 2021 Nov 26;9:749963. doi: 10.3389/fcell.2021.749963 (PMC8661034; doi:10.3389/fcell.2021.749963)
Supplement: Supplementary file 1 [file Table2.XLSX]

## Sheet: Sheet1
ortholog-group ID		Correlation in each species											Mean correlation	Annotation in vertebrates						Annotation in chordates		Annotation in echinoderms
ortho_id	ortho_id_full	Gg	Ps	Mm	Xl	Ol	Dr	Ci	Bf	Oj	Lv	Sp	chordates_mean	chicken(Gg)	turtle(Ps)	mouse(Mm)	frog(Xl)	medaka(Ol)	zebrafish(Dr)	tunicate(Ci)	amphioxus(Bf)	feather star(Oj)	sea cucumber (Aj)	green sea urchin (Lv)	purple sea urchin (Sp)
4349	PORTHOMCL4349[AjBfCgCiDrGgLvMmOjOlPsSpXl|(15 genes, 13 taxa)]:	-0.572857	-0.929582	-0.507692	-0.925107	-0.569804	-0.910471	-0.816299	-0.783077	0.202059	-0.0313313	-0.661765	-0.751861	EIF2D	EIF2D	EIF2D	EIF2D.S;EIF2D	EIF2D	EIF2D	EUKARYOTIC TRANSLATION INITIATION FACTOR 2D-LIKE	EIF2D	EIF2D_RABIT;EIF2D	PUTATIVE EUKARYOTIC TRANSLATION INITIATION FACTOR 2D-LIKE;LIGATIN;EIF2D	EIF2D_RABIT;EIF2D	EUKARYOTIC TRANSLATION INITIATION FACTOR 2D;EIF2D
5647	PORTHOMCL5647[AjBfCgCiDrGgLvMmOlPsSpXl|(14 genes, 12 taxa)]:	-0.437527	-0.858374	-0.819615	-0.694877	-0.710809	-0.895441	-0.598169	-0.762196	0	-0.104665	-0.562868	-0.722126	TUBGCP4	TUBGCP4	TUBGCP4	LOC108712877;TUBGCP4.L;TUBGCP4	TUBGCP4	TUBGCP4	GAMMA-TUBULIN COMPLEX COMPONENT 4-LIKE;TUBGCP4	TUBGCP4		PUTATIVE GAMMA-TUBULIN COMPLEX COMPONENT 4-LIKE;PUTATIVE GAMMA-TUBULIN COMPLEX COMPONENT 4 ISOFORM X2;TUBGCP4	GCP4_HUMAN;TUBGCP4	GAMMA-TUBULIN COMPLEX COMPONENT 4, TRANSCRIPT VARIANT X1; GAMMA-TUBULIN COMPLEX COMPONENT 4, TRANSCRIPT VARIANT X2;TUBGCP4
3245	PORTHOMCL3245[AjBfCgCiDrGgLvMmOjOlPsSpXl|(17 genes, 13 taxa)]:	-0.636484	-0.848703	-0.640495	-0.838505	-0.628456	-0.529853	-0.78961	-0.856432	-0.681676	-0.778019	-0.593137	-0.721067	ZW10	ZW10	ZW10	ZW10.S;ZW10.L;ZW10	ZW10	ZW10	CENTROMERE/KINETOCHORE PROTEIN ZW10 HOMOLOG	ZW10	ZW10_HUMAN;ZW10	HYPOTHETICAL PROTEIN;PUTATIVE CENTROMERE/KINETOCHORE PROTEIN ZW10-LIKE	ZW10_PONAB;ZW10_HUMAN	CENTROMERE/KINETOCHORE PROTEIN ZW10 HOMOLOG;ZW10
4235	PORTHOMCL4235[AjBfCgCiDrGgLvMmOjOlPsSpXl|(16 genes, 13 taxa)]:	-0.328571	-0.906813	-0.747473	-0.840931	-0.595833	-0.944281	-0.773377	-0.61839	-0.103206	0.130114	-0.677574	-0.719459	GUF1	GUF1	GUF1	GUF1.L;GUF1	GUF1	GUF1	TRANSLATION FACTOR GUF1, MITOCHONDRIAL-LIKE;GUF1	GUF1	GUF1_BOVIN;GUF1_MOUSE;GUF1	PUTATIVE TRANSLATION FACTOR GUF1, MITOCHONDRIAL	GUF1_HUMAN;LEPA_RHOP5	TRANSLATION FACTOR GUF1, MITOCHONDRIAL;GUF1
6622	PORTHOMCL6622[AjBfCgCiDrGgLvMmOjOlPsSpXl|(13 genes, 13 taxa)]:	-0.640275	-0.945011	-0.577143	-0.836716	-0.785172	-0.208294	-0.876636	-0.859388	-0.860588	-0.785635	-0.748529	-0.716079		ZWILCH	ZWILCH	ZWILCH.S;ZWILCH	ZWILCH	ZWILCH	PROTEIN ZWILCH HOMOLOG		ZWILC_XENLA	HYPOTHETICAL PROTEIN	ZWILC_XENTR	PROTEIN ZWILCH HOMOLOG
6082	PORTHOMCL6082[AjBfCgCiDrGgMmOjOlPsSpXl|(13 genes, 12 taxa)]:	-0.786209	-0.377846	-0.70956	-0.863358	-0.539559	-0.722147	-0.851117	-0.661189	-0.470971	0	-0.662132	-0.688873	B3GALNT2	B3GALNT2	B3GALNT2	B3GALNT2.L;B3GALNT2	B3GALNT2	B3GALNT2	UDP-GALNAC:BETA-1,3-N-ACETYLGALACTOSAMINYLTRANSFERASE 2	B3GALNT2	B3GL2_XENLA	PUTATIVE UDP-GALNAC:BETA-1,3-N-ACETYLGALACTOSAMINYLTRANSFERASE 2;PUTATIVE UDP-GALNAC:BETA-1,3-N-ACETYLGALACTOSAMINYLTRANSFERASE 2-LIKE ISOFORM X2;B3GALNT2		UDP-GALNAC:BETA-1,3-N-ACETYLGALACTOSAMINYLTRANSFERASE 2
4190	PORTHOMCL4190[AjBfCgCiDrGgLvMmOjOlPsSpXl|(16 genes, 13 taxa)]:	-0.372912	-0.685011	-0.55544	-0.880637	-0.92799	-0.647353	-0.626455	-0.778571	-0.315647	0.214056	0.0919118	-0.684296	CCT3	CCT3	CCT3	CCT3.L;CCT3	CCT3	CCT3	T-COMPLEX PROTEIN 1 SUBUNIT GAMMA-LIKE;CCT3	CCT3	TCPG_XENLA	PUTATIVE T-COMPLEX PROTEIN 1 SUBUNIT GAMMA	TCPG_BOVIN	T-COMPLEX PROTEIN 1 SUBUNIT GAMMA
5645	PORTHOMCL5645[AjBfCgCiDrGgLvMmOjOlPsSpXl|(14 genes, 13 taxa)]:	-0.681044	-0.865143	-0.549286	-0.855025	-0.579681	-0.895647	-0.630779	-0.37014	-0.847412	-0.491785	-0.51348	-0.678343	C14ORF166;RTRAF	C14ORF166;RTRAF	2700060E02RIK;RTRAF	C14ORF166.S;C14ORF166.L;RTRAF	RTRAF	ZGC:56576;RTRAF	UPF0568 PROTEIN C14ORF166 HOMOLOG;RTRAF	RTRAF	CN166_DANRE	HYPOTHETICAL PROTEIN;RTRAF	CN166_PONAB	UPF0568 PROTEIN C14ORF166 HOMOLOG
4504	PORTHOMCL4504[AjBfCgCiDrGgMmOjOlPsSpXl|(15 genes, 12 taxa)]:	-0.657253	-0.85622	-0.580934	-0.525221	-0.453652	-0.896471	-0.737234	-0.673775	-0.301559	0	-0.677696	-0.672595	NAP1L1	NAP1L1	NAP1L1;NAP1L2;NAP1L3	NAP1L1.L	NAP1L1	NAP1L1	NUCLEOSOME ASSEMBLY PROTEIN 1-LIKE 1;NAP1L1		NP1L1_MOUSE;NAP1L4	NUCLEOSOME ASSEMBLY PROTEIN;NAP1L4		NUCLEOSOME ASSEMBLY PROTEIN 1-LIKE 1, TRANSCRIPT VARIANT X5; NUCLEOSOME ASSEMBLY PROTEIN 1-LIKE 1, TRANSCRIPT VARIANT X3; NUCLEOSOME ASSEMBLY PROTEIN 1-LIKE 1, TRANSCRIPT VARIANT X4; NUCLEOSOME ASSEMBLY PROTEIN 1-LIKE 1, TRANSCRIPT VARIANT X2; NUCLEOSOME ASSEMBLY PROTEIN 1-LIKE 1, TRANSCRIPT VARIANT X1;NUCLEOSOME ASSEMBLY PROTEIN 1-LIKE 1
4119	PORTHOMCL4119[AjBfCgCiDrGgLvMmOjOlPsSpXl|(16 genes, 13 taxa)]:	-0.593297	-0.580703	-0.518736	-0.880686	-0.590025	-0.436353	-0.853974	-0.907902	0.214118	0.0539938	-0.203186	-0.67021	ADRM1	ADRM1	ADRM1;GM9774	ADRM1.L;ADRM1.S;ADRM1	ADRM1;PROTEASOMAL UBIQUITIN RECEPTOR ADRM1	ADRM1	PROTEASOMAL UBIQUITIN RECEPTOR ADRM1-LIKE, TRANSCRIPT VARIANT X1; PROTEASOMAL UBIQUITIN RECEPTOR ADRM1-LIKE, TRANSCRIPT VARIANT X2;ADRM1	ADRM1	ADRM1_RAT;ADRM1	PUTATIVE PROTEASOMAL UBIQUITIN RECEPTOR ADRM1-LIKE	ADRM1_RAT;ADRM1	PROTEASOMAL UBIQUITIN RECEPTOR ADRM1
1982	PORTHOMCL1982[AjBfCgCiDrGgLvMmOjOlPsSpXl|(21 genes, 13 taxa)]:	-0.458022	-0.704132	-0.552143	-0.854755	-0.616348	-0.830176	-0.44687	-0.864126	-0.712853	0.486958	0.0492647	-0.665822	RTCB	C22ORF28;RTCB	RTCB	RTCB.S;RTCB.L;RTCB	RTCB	RTCB	TRNA-SPLICING LIGASE RTCB HOMOLOG;RTCB	RTCB	RTCB_DANRE;RTCB_RAT;RTCB	HYPOTHETICAL PROTEIN;PUTATIVE TRNA-SPLICING LIGASE RTCB-LIKE	RTCB_DANRE;RTCB	TRNA-SPLICING LIGASE RTCB HOMOLOG, TRANSCRIPT VARIANT X1; TRNA-SPLICING LIGASE RTCB HOMOLOG, TRANSCRIPT VARIANT X2;RTCB
5682	PORTHOMCL5682[AjBfCgCiDrGgLvMmOjOlPsSpXl|(14 genes, 13 taxa)]:	-0.205714	-0.697319	-0.567253	-0.892618	-0.656127	-0.873419	-0.768974	-0.603643	0.754647	0.260599	-0.355882	-0.658133	NIF3L1	NIF3L1	NIF3L1	NIF3L1.S;NIF3L1	NIF3L1	NIF3L1	NIF3-LIKE PROTEIN 1;NIF3L1	NIF3L1	NIF3L_BOVIN;NIF3L1	PUTATIVE GTP CYCLOHYDROLASE 1 TYPE 2 NIF3L1	NIF3L_BOVIN;NIF3L_HUMAN;NIF3L1	PUTATIVE GTP CYCLOHYDROLASE 1 TYPE 2 NIF3L1;NIF3L1
2232	PORTHOMCL2232[AjBfCgCiDrGgLvMmOlPsSpXl|(20 genes, 12 taxa)]:	-0.737857	-0.850901	-0.772692	-0.386691	-0.840931	-0.486176	-0.769169	-0.367097	0	-0.194613	-0.507475	-0.651439	DICER1	DICER1	DICER1	DICER1.L;DICER1.S;DICER1	DICER1	DICER1	ENDORIBONUCLEASE DICER			DICER;PUTATIVE ENDORIBONUCLEASE DICER-LIKE;PUTATIVE ENDORIBONUCLEASE DICER ISOFORM X1	DICER_DANRE;DICER_CRIGR	ENDORIBONUCLEASE DICER, TRANSCRIPT VARIANT X1; ENDORIBONUCLEASE DICER, TRANSCRIPT VARIANT X2
2984	PORTHOMCL2984[AjBfCgCiDrGgLvMmOjOlPsSpXl|(18 genes, 13 taxa)]:	-0.543242	-0.876615	-0.559945	-0.561103	-0.879804	-0.426882	-0.77926	-0.58021	-0.263118	-0.272054	-0.757721	-0.650883	XRCC5	XRCC5	XRCC5	XRCC5.L;XRCC5	XRCC5	XRCC5	ZINC FINGER PROTEIN ZF(C2H2)-102	XRCC5	XRCC5_HUMAN;XRCC5_MOUSE	PUTATIVE X-RAY REPAIR CROSS-COMPLEMENTING PROTEIN 5;XRCC5	XRCC5_HUMAN	X-RAY REPAIR CROSS-COMPLEMENTING PROTEIN 5;XRCC5
5495	PORTHOMCL5495[AjBfCiDrGgLvMmOjOlPsSpXl|(14 genes, 12 taxa)]:	-0.409945	-0.718989	-0.548956	-0.404191	-0.563137	-0.816853	-0.895104	-0.820669	-0.130941	0	0.0303922	-0.647231	EIF2B1	EIF2B1	EIF2B1	EIF2B1.L;LOC108705574;EIF2B1	EIF2B1	EIF2B1	TRANSLATION INITIATION FACTOR EIF-2B SUBUNIT ALPHA-LIKE;EIF2B1	EIF2B1	EI2BA_BOVIN;EIF2B1	PUTATIVE TRANSLATION INITIATION FACTOR EIF-2B SUBUNIT ALPHA;EIF2B1	EI2BA_BOVIN	TRANSLATION INITIATION FACTOR EIF-2B SUBUNIT ALPHA;EIF2B1
5793	PORTHOMCL5793[AjBfCgCiDrGgLvMmOjOlPsSpXl|(14 genes, 13 taxa)]:	-0.749011	-0.88567	-0.581374	-0.496303	-0.511103	-0.795948	-0.551008	-0.566863	0.326911	0.412663	-0.366652	-0.64216	TBX20	TBX20	TBX20	TBX20.L;TBX20	TBX20	TBX20	T-BOX TRANSCRIPTION FACTOR CI-TBX20;TBX20		TBX20_DANRE;TBX20	PUTATIVE T-BOX TRANSCRIPTION FACTOR TBX20 ISOFORM X2	TBX20_MOUSE	UNCHARACTERIZED LOC100889015
7609	PORTHOMCL7609[BfCgCiDrGgLvMmOjOlPsSpXl|(12 genes, 12 taxa)]:	-0.0622527	-0.747824	-0.706429	-0.693309	-0.499265	-0.691735	-0.802649	-0.892985	0.153559	0.307905	-0.428401	-0.637056	DPH7	WDR85;DPH7	DPH7	DPH7.L;DPH7	DPH7	DPH7	DIPHTHINE METHYLTRANSFERASE-LIKE;DPH7	DPH7	DPH7_MOUSE;DPH7		MPP7_MOUSE	DIPHTHINE METHYLTRANSFERASE-LIKE
6370	PORTHOMCL6370[AjBfCiDrGgMmOjOlPsSpXl|(13 genes, 11 taxa)]:	-0.339341	-0.924044	-0.674615	-0.219534	-0.847585	-0.875647	-0.532571	-0.655944	-0.582559	0	-0.652941	-0.63366	IFT46	IFT46	IFT46	IFT46.S	IFT46	IFT46	INTRAFLAGELLAR TRANSPORT PROTEIN 46 HOMOLOG;IFT46	IFT46	IFT46_DANRE;IFT46	HYPOTHETICAL PROTEIN;PUTATIVE INTRAFLAGELLAR TRANSPORT PROTEIN;IFT46		INTRAFLAGELLAR TRANSPORT PROTEIN 46 HOMOLOG;IFT46
4622	PORTHOMCL4622[AjBfCgCiDrGgLvMmOjOlPsSpXl|(15 genes, 13 taxa)]:	-0.471923	-0.408352	-0.43533	-0.844951	-0.511716	-0.813102	-0.770442	-0.801585	-0.865735	-0.516698	-0.485172	-0.632175	MRPL45	MRPL45	MRPL45	MRPL45.L;MRPL45	MRPL45	MRPL45	39S RIBOSOMAL PROTEIN L45, MITOCHONDRIAL-LIKE	MRPL45	RM45_XENLA;MRPL45	PUTATIVE 39S RIBOSOMAL PROTEIN L45, MITOCHONDRIAL;MRPL45	RM45_XENLA;RM45_XENTR;RM45_MOUSE;MRPL45	39S RIBOSOMAL PROTEIN L45, MITOCHONDRIAL;MRPL45
5484	PORTHOMCL5484[AjBfCgCiDrGgLvMmOjOlPsSpXl|(14 genes, 13 taxa)]:	-0.462308	-0.766198	-0.507088	-0.902647	-0.606005	-0.271059	-0.764805	-0.771888	-0.899794	-0.370898	0.123775	-0.6315	PDSS1	PDSS1	PDSS1	PDSS1.L;PDSS1	PDSS1	PDSS1	DECAPRENYL-DIPHOSPHATE SYNTHASE SUBUNIT 1-LIKE	PDSS1	DPS1_HUMAN;PDSS1	PUTATIVE DECAPRENYL-DIPHOSPHATE SYNTHASE SUBUNIT 1-LIKE	DPS1_HUMAN	DECAPRENYL-DIPHOSPHATE SYNTHASE SUBUNIT 1;PDSS1
8106	PORTHOMCL8106[BfCiDrGgMmOlPsXl|(11 genes, 8 taxa)]:	-0.452582	-0.72633	-0.485824	-0.569877	-0.550833	-0.695412	-0.882208	-0.679727	0	0	0	-0.630349	LARP4	LARP4	LARP4	LARP4.S;LARP4.L;LARP4	LARP4AA	LARP4AA;LARP4AB	UNCHARACTERIZED LOC100185505
1937	PORTHOMCL1937[AjBfCgCiDrGgLvMmOjOlPsSpXl|(22 genes, 13 taxa)]:	-0.70456	-0.839604	-0.692308	-0.849375	-0.53848	-0.677735	-0.614026	-0.118182	-0.814235	-0.680619	-0.749265	-0.629284	KNTC1		KNTC1	KNTC1.L;KNTC1	KNTC1	KNTC1	KINETOCHORE-ASSOCIATED PROTEIN 1-LIKE		KNTC1_HUMAN;KNTC1_MOUSE	PUTATIVE KINETOCHORE-ASSOCIATED PROTEIN 1	KNTC1_MOUSE;KNTC1_HUMAN	KINETOCHORE-ASSOCIATED PROTEIN 1
4764	PORTHOMCL4764[AjBfCgCiDrGgLvMmOjOlPsSpXl|(15 genes, 13 taxa)]:	-0.401758	-0.732967	-0.545824	-0.922647	-0.642132	-0.714529	-0.353545	-0.718761	-0.113176	-0.466419	-0.613848	-0.629021	LARS	LARS	LARS	LARS.L;LARS	LARSB	LARSA	LEUCINE--TRNA LIGASE, CYTOPLASMIC, TRANSCRIPT VARIANT X2; LEUCINE--TRNA LIGASE, CYTOPLASMIC, TRANSCRIPT VARIANT X1;LARS	LARS	SYLC_HUMAN;LARS	PUTATIVE LEUCINE--TRNA LIGASE, CYTOPLASMIC-LIKE	SYLC_HUMAN	LEUCINE--TRNA LIGASE, CYTOPLASMIC-LIKE;LEUCINE--TRNA LIGASE, CYTOPLASMIC
4626	PORTHOMCL4626[AjBfCgCiDrGgLvMmOjOlPsSpXl|(15 genes, 13 taxa)]:	-0.51956	-0.74844	-0.529176	-0.807157	-0.885172	-0.567118	-0.810221	-0.16	0.642206	0.500743	-0.682598	-0.628355	UCHL5	UCHL5	UCHL5	UCHL5.S;UCHL5.L;UCHL5	UCHL5	UCHL5	UBIQUITIN CARBOXYL-TERMINAL HYDROLASE ISOZYME L5-LIKE;UCHL5	UCHL5	UCHL5_MOUSE	UBIQUITIN CARBOXYL-TERMINAL HYDROLASE ISOZYME L5-LIKE PROTEIN	UCHL5_HUMAN;UCHL5	UBIQUITIN CARBOXYL-TERMINAL HYDROLASE ISOZYME L5;UCHL5
2723	PORTHOMCL2723[AjBfCgCiDrGgMmOjOlPsSpXl|(19 genes, 12 taxa)]:	-0.539231	-0.949714	-0.452802	-0.701912	-0.655637	-0.178471	-0.754208	-0.781712	0.430471	0	-0.33701	-0.626711	STRADA	STRADA;STRADB	STRADA;STRADB	STRADA.L;STRADB.L;STRADA.S;STRADA;STRADB	STRADA;STRADB	STRADA;STRADB	STE20-RELATED KINASE ADAPTER PROTEIN ALPHA, TRANSCRIPT VARIANT X2; STE20-RELATED KINASE ADAPTER PROTEIN ALPHA, TRANSCRIPT VARIANT X1;STRADA		STRAA_CHICK;STRADA	PUTATIVE STE20-RELATED KINASE ADAPTER PROTEIN ALPHA ISOFORM X1;STRADA		STE20-RELATED KINASE ADAPTER PROTEIN ALPHA, TRANSCRIPT VARIANT X2; STE20-RELATED KINASE ADAPTER PROTEIN ALPHA, TRANSCRIPT VARIANT X1
3949	PORTHOMCL3949[AjBfCgCiDrGgLvMmOjOlPsSpXl|(16 genes, 13 taxa)]:	-0.44978	-0.581055	-0.554396	-0.937794	-0.272059	-0.964445	-0.919468	-0.331189	0.398441	-0.609494	-0.51348	-0.626273	EIF2B2	EIF2B2	EIF2B2	EIF2B2.L;EIF2B2	EIF2B2	EIF2B2	TRANSLATION INITIATION FACTOR EIF-2B SUBUNIT BETA-LIKE;EIF2B2	EIF2B2	EI2BB_BOVIN;EIF2B2	PUTATIVE TRANSLATION INITIATION FACTOR EIF-2B SUBUNIT BETA-LIKE;EIF2B2	EI2BB_TAKRU;EI2BB_BOVIN	TRANSLATION INITIATION FACTOR EIF-2B SUBUNIT BETA;UNCHARACTERIZED LOC762814;EIF2B2
5663	PORTHOMCL5663[AjBfCgCiDrGgLvMmOlPsSpXl|(14 genes, 12 taxa)]:	-0.685824	-0.494725	-0.366813	-0.903333	-0.661127	-0.502029	-0.857532	-0.538392	0	0.254799	-0.156495	-0.626222	DPM1	DPM1	DPM1;GM20716	DPM1.S;LOC414689;DPM1	DPM1	DPM1	DOLICHOL-PHOSPHATE MANNOSYLTRANSFERASE SUBUNIT 1	DPM1		PUTATIVE DOLICHOL-PHOSPHATE MANNOSYLTRANSFERASE SUBUNIT 1	DPM1_MOUSE;DPM1	DOLICHOL-PHOSPHATE MANNOSYLTRANSFERASE SUBUNIT 1
4123	PORTHOMCL4123[AjBfCgCiDrGgLvMmOjOlPsSpXl|(16 genes, 13 taxa)]:	-0.463956	-0.765758	-0.709615	-0.875049	-0.65	-0.479176	-0.564727	-0.498741	-0.497588	-0.494923	0.0405637	-0.625878	USP5;USP13	USP5	USP5	USP5.L;USP5.S;USP5	USP5	USP5	ZINC FINGER (UBIQUITIN THIOLESTERASE TYPE)-1;USP5	USP5	UBP5_HUMAN;USP5	PUTATIVE UBIQUITIN CARBOXYL-TERMINAL HYDROLASE 5;PUTATIVE UBIQUITIN CARBOXYL-TERMINAL HYDROLASE 5-LIKE	UBP5_MOUSE;USP5	UBIQUITIN CARBOXYL-TERMINAL HYDROLASE 5;USP5
3352	PORTHOMCL3352[AjBfCgCiDrGgLvMmOjOlPsSpXl|(17 genes, 13 taxa)]:	-0.73956	-0.961011	-0.679945	-0.720539	-0.41701	-0.0308824	-0.692662	-0.741818	-0.816441	-0.0765325	-0.679657	-0.622929	TYMS	TYMS	TYMS	TYMS.L;TYMS	TYMS	TYMS	THYMIDYLATE SYNTHASE-LIKE;TYMS	TYMS	TYSY_MOUSE;TYMS	HYPOTHETICAL PROTEIN;PUTATIVE THYMIDYLATE SYNTHASE;TYMS	TYSY_MOUSE;TYMS	THYMIDYLATE SYNTHASE;TYMS
3867	PORTHOMCL3867[AjBfCgCiDrGgLvMmOjOlPsSpXl|(16 genes, 13 taxa)]:	-0.300495	-0.958549	-0.306264	-0.582304	-0.167255	-0.910382	-0.837052	-0.91164	-0.553647	0.156739	-0.607108	-0.621743	NAA20	NAA20	NAA20	NAA20.S;NAA20	NAA20	NAA20	N-ALPHA-ACETYLTRANSFERASE 20-LIKE	NAA20	NAA20_XENLA	PUTATIVE N-ALPHA-ACETYLTRANSFERASE 20-LIKE	NAA20_XENTR;NAA20_MOUSE	N-ALPHA-ACETYLTRANSFERASE 20-LIKE;N-ALPHA-ACETYLTRANSFERASE 20;NAA20
3421	PORTHOMCL3421[AjBfCgCiDrGgLvMmOjOlPsSpXl|(17 genes, 13 taxa)]:	-0.453462	-0.692176	-0.561648	-0.680784	-0.570343	-0.402735	-0.754091	-0.814579	0.621824	-0.533168	-0.15625	-0.616227	EIF3A	EIF3A	EIF3A	EIF3A;EIF3A.L	EIF3S10;EIF3A	EIF3S10;EIF3A	EUKARYOTIC TRANSLATION INITIATION FACTOR 3 SUBUNIT A;EIF3A	EIF3A	EIF3A_DANRE	PUTATIVE EUKARYOTIC TRANSLATION INITIATION FACTOR 3 SUBUNIT A;EIF3A	EIF3A_DANRE;EIF3A	EUKARYOTIC TRANSLATION INITIATION FACTOR 3 SUBUNIT A;EIF3A
4923	PORTHOMCL4923[AjBfCgCiDrGgLvMmOjOlPsSpXl|(15 genes, 13 taxa)]:	-0.349011	-0.600923	-0.560385	-0.699093	-0.874485	-0.830353	-0.781662	-0.218085	0.156206	0.0118679	0.0498775	-0.61425	DCTN5	DCTN5	DCTN5	LOC108701903;DCTN5.S;DCTN5	DCTN5	DCTN5	DYNACTIN SUBUNIT 5-LIKE;DCTN5	DCTN5	DCTN5_MOUSE;DCTN5	PUTATIVE DYNACTIN SUBUNIT 5 ISOFORM X2;DCTN5	DCTN5_MOUSE	DYNACTIN SUBUNIT 5, TRANSCRIPT VARIANT X1; DYNACTIN SUBUNIT 5, TRANSCRIPT VARIANT X2;MEMBRANE PROGESTIN RECEPTOR GAMMA-A, TRANSCRIPT VARIANT X2; MEMBRANE PROGESTIN RECEPTOR GAMMA-A, TRANSCRIPT VARIANT X1;DCTN5
6709	PORTHOMCL6709[AjBfCiDrGgLvMmOjOlPsSpXl|(13 genes, 12 taxa)]:	-0.0162637	-0.717099	-0.832527	-0.571103	-0.554167	-0.517676	-0.824325	-0.874825	0.358706	0.241486	-0.131005	-0.613498	DYNC2LI1	DYNC2LI1	DYNC2LI1	DYNC2LI1.S;DYNC2LI1	DYNC2LI1	DYNC2LI1	CYTOPLASMIC DYNEIN 2 LIGHT INTERMEDIATE CHAIN 1-LIKE;DYNC2LI1	DYNC2LI1	DC2L1_MOUSE;DYNC2LI1	PUTATIVE CYTOPLASMIC DYNEIN 2 LIGHT INTERMEDIATE CHAIN 1-LIKE;DYNC2LI1	DC2L1_BOVIN;DYNC2LI1	CYTOPLASMIC DYNEIN 2 LIGHT INTERMEDIATE CHAIN 1-LIKE;DYNC2LI1
999	PORTHOMCL999[AjBfCgCiDrGgLvMmOjOlPsSpXl|(29 genes, 13 taxa)]:	-0.396813	-0.797451	-0.568901	-0.857802	-0.47348	-0.894252	-0.394623	-0.523147	-0.423176	-0.811887	-0.10172	-0.613309	ATM	ATM	ATM	ATM.L	ATM	ATM	SERINE-PROTEIN KINASE ATM-LIKE;UNCHARACTERIZED LOC104266343;LOC104266316	ATM	ATM_PIG	PUTATIVE SERINE-PROTEIN KINASE ATM-LIKE;PUTATIVE SERINE-PROTEIN KINASE ATM;ATAXIA TELANGIECTASIA MUTATED	ATM_MOUSE;ATM_HUMAN	SERINE-PROTEIN KINASE ATM;ATAXIA TELANGIECTASIA MUTATED;SERINE-PROTEIN KINASE ATM-LIKE
4062	PORTHOMCL4062[AjBfCgCiDrGgLvMmOjOlPsSpXl|(16 genes, 13 taxa)]:	-0.539725	-0.883516	-0.87022	-0.340833	-0.496078	-0.713824	-0.77387	-0.276285	-0.400941	-0.186233	-0.444485	-0.611794	IFT74	IFT74	IFT74	LOC108706942;IFT74.L;IFT74	IFT74	IFT74	INTRAFLAGELLAR TRANSPORT PROTEIN 74 HOMOLOG, TRANSCRIPT VARIANT X1; INTRAFLAGELLAR TRANSPORT PROTEIN 74 HOMOLOG, TRANSCRIPT VARIANT X2;IFT74	IFT74	IFT74_MOUSE;IFT74	PUTATIVE INTRAFLAGELLAR TRANSPORT PROTEIN;IFT74	IFT74_MOUSE;IFT74	INTRAFLAGELLAR TRANSPORT PROTEIN 74 HOMOLOG;IFT74
3487	PORTHOMCL3487[AjBfCgCiDrGgLvMmOjOlPsSpXl|(17 genes, 13 taxa)]:	-0.538352	-0.790286	-0.592143	-0.568015	-0.158897	-0.748952	-0.908481	-0.566627	0.668618	-0.699732	-0.104289	-0.608969	CCDC85C	CCDC85C	CCDC85C	CCDC85C.S;CCDC85C	CCDC85CB;CCDC85C	CCDC85CA;CCDC85CB;CCDC85C	COILED-COIL DOMAIN-CONTAINING PROTEIN 85C;CCDC85C		CC85C_XENTR	PUTATIVE COILED-COIL DOMAIN-CONTAINING PROTEIN	C85CA_DANRE	COILED-COIL DOMAIN-CONTAINING PROTEIN 85C, TRANSCRIPT VARIANT X2; COILED-COIL DOMAIN-CONTAINING PROTEIN 85C, TRANSCRIPT VARIANT X1; COILED-COIL DOMAIN-CONTAINING PROTEIN 85C, TRANSCRIPT VARIANT X3; COILED-COIL DOMAIN-CONTAINING PROTEIN 85C, TRANSCRIPT VARIANT X4
6625	PORTHOMCL6625[AjBfCgCiDrGgMmOjOlPsSpXl|(13 genes, 12 taxa)]:	-0.402857	-0.878286	-0.427033	-0.530515	-0.441275	-0.589382	-0.762442	-0.83766	-0.859147	0	0.0942402	-0.608681	TSEN2	TSEN2	TSEN2	TSEN2.L;TSEN2	TRNA SPLICING ENDONUCLEASE SUBUNIT 2;TSEN2	TSEN2	GLYCEROL-3-PHOSPHATE PHOSPHATASE-LIKE, TRANSCRIPT VARIANT X2; GLYCEROL-3-PHOSPHATE PHOSPHATASE-LIKE, TRANSCRIPT VARIANT X1		SEN2_RAT	PUTATIVE TRNA-SPLICING ENDONUCLEASE SUBUNIT SEN2		TRNA-SPLICING ENDONUCLEASE SUBUNIT SEN2
5668	PORTHOMCL5668[AjBfCgCiDrGgLvMmOjOlPsSpXl|(14 genes, 13 taxa)]:	-0.546374	-0.767429	-0.480879	-0.517475	-0.313848	-0.469559	-0.859974	-0.900611	-0.102088	0.105346	0.15625	-0.607019	WDR91	WDR91	WDR91	WDR91.L;WDR91	WDR91	WDR91	WD REPEAT-CONTAINING PROTEIN 91	WDR91	WDR91_CHICK;WDR91	PUTATIVE WD REPEAT-CONTAINING PROTEIN 91	WDR91_CHICK	WD REPEAT-CONTAINING PROTEIN 91
2941	PORTHOMCL2941[AjBfCgCiDrGgLvMmOjOlPsSpXl|(18 genes, 13 taxa)]:	-0.294396	-0.71156	-0.415824	-0.841471	-0.547977	-0.591971	-0.696416	-0.724336	-0.762412	-0.864045	-0.729412	-0.602994	MARS2	MARS2	MARS2	MARS2.L;MARS2	MARS2	MARS2	METHIONINE--TRNA LIGASE, MITOCHONDRIAL-LIKE;MARS2	MARS2	SYMM_TAKRU;SYMC_XENLA;SYMM_HUMAN	HYPOTHETICAL PROTEIN;MARS2	SYMM_TAKRU;MARS2	METHIONINE--TRNA LIGASE, MITOCHONDRIAL
5736	PORTHOMCL5736[AjBfCgCiDrGgLvMmOjOlPsSpXl|(14 genes, 13 taxa)]:	-0.445714	-0.731341	-0.539396	-0.768064	-0.599706	-0.363088	-0.720597	-0.64731	0.360441	-0.177977	-0.227206	-0.601902	PDIA6	PDIA6	PDIA6	PDIA6.L;PDIA6	PDIA6	PDIA6	PROTEIN DISULFIDE-ISOMERASE A6-LIKE;PDIA6	PDIA6	PDIA6_HUMAN	HYPOTHETICAL PROTEIN;PDIA6	PDIA6_RAT;PDIA6	PROBABLE PROTEIN DISULFIDE-ISOMERASE A6;PDIA6
4908	PORTHOMCL4908[AjBfCgCiDrGgLvMmOjOlPsSpXl|(15 genes, 13 taxa)]:	-0.587363	-0.544264	-0.589341	-0.875613	-0.587623	-0.494147	-0.548325	-0.566853	0.689559	0	0.0709559	-0.599191	PDDC1;GATD1	PDDC1;GATD1	PDDC1;GATD1	PDDC1.L;GATD1	GATD1	PDDC1	PARKINSON DISEASE 7 DOMAIN-CONTAINING PROTEIN 1, TRANSCRIPT VARIANT X2; PARKINSON DISEASE 7 DOMAIN-CONTAINING PROTEIN 1, TRANSCRIPT VARIANT X3; PARKINSON DISEASE 7 DOMAIN-CONTAINING PROTEIN 1, TRANSCRIPT VARIANT X1;GATD1	PDDC1	PDDC1_XENLA;GATD1	PUTATIVE PARKINSON DISEASE 7 DOMAIN-CONTAINING PROTEIN 1-LIKE		PARKINSON DISEASE 7 DOMAIN-CONTAINING PROTEIN 1
1876	PORTHOMCL1876[AjBfCgCiDrGgLvMmOjOlPsSpXl|(22 genes, 13 taxa)]:	-0.0575824	-0.677626	-0.579396	-0.150956	-0.888652	-0.910235	-0.623091	-0.867749	0.0322353	-0.233003	-0.652941	-0.594411	TXNDC9	TXNDC9	TXNDC9	TXNDC9.L;TXNDC9	TXNDC9	TXNDC9	THIOREDOXIN DOMAIN-CONTAINING PROTEIN 9-LIKE;TXNDC9	TXNDC9	PLP1_SCHPO;TXND9_BOVIN;TXNDC9	THIOREDOXIN DOMAIN-CONTAINING PROTEIN C2F3.12C;PUTATIVE THIOREDOXIN DOMAIN-CONTAINING PROTEIN 9-LIKE;TXNDC9	PLP1_SCHPO;TXND9_MOUSE;TXNDC9	THIOREDOXIN DOMAIN-CONTAINING PROTEIN PLP1;THIOREDOXIN DOMAIN-CONTAINING PROTEIN 9;TXNDC9
901	PORTHOMCL901[AjBfCgCiDrGgLvMmOjOlPsSpXl|(31 genes, 13 taxa)]:	-0.482033	-0.90989	-0.555934	-0.811103	-0.0461275	-0.694941	-0.793286	-0.440839	-0.215	-0.0652012	-0.678922	-0.591769	RARS;RARS2	RARS;RARS2	RARS;RARS2	RARS.S;RARS2.S;RARS;RARS2	RARS2	RARS;RARS2	ARGININE--TRNA LIGASE, CYTOPLASMIC;PROBABLE ARGININE--TRNA LIGASE, MITOCHONDRIAL;RARS;RARS2	RARS;RARS2	SYRC_XENTR;SYRM_BOVIN;RARS;RARS2	PUTATIVE ARGININE--TRNA LIGASE, CYTOPLASMIC;PUTATIVE ARGININE--TRNA LIGASE, MITOCHONDRIAL;RARS;RARS2	SYRM_BOVIN;SYRC_XENTR;RARS	ARGININE--TRNA LIGASE, CYTOPLASMIC;PROBABLE ARGININE--TRNA LIGASE, MITOCHONDRIAL;RARS;RARS2
3924	PORTHOMCL3924[AjBfCgCiDrGgLvMmOjOlPsSpXl|(16 genes, 13 taxa)]:	-0.246648	-0.868352	-0.522088	-0.685098	-0.235515	-0.749859	-0.771896	-0.644081	0.530294	-0.180784	0.0291667	-0.590442	VPS8	VPS8	VPS8	LOC108701859;VPS8	VPS8	VPS8	VACUOLAR PROTEIN SORTING-ASSOCIATED PROTEIN 8 HOMOLOG;VPS8	VPS8	VPS8_MOUSE;VPS8	PUTATIVE VACUOLAR PROTEIN SORTING-ASSOCIATED PROTEIN 8-LIKE;VPS8	VPS8_MOUSE;VPS8	VACUOLAR PROTEIN SORTING-ASSOCIATED PROTEIN 8 HOMOLOG;VPS8
2998	PORTHOMCL2998[AjBfCgCiDrGgLvMmOjOlPsSpXl|(18 genes, 13 taxa)]:	-0.434615	-0.73578	-0.542637	-0.512083	-0.554828	-0.319235	-0.778169	-0.763636	-0.730382	-0.592652	-0.271446	-0.580123	GNL3	GNL3	GNL3L;GNL3	GNL3L.S;GNL3L	GNL3L;GNL3	GNL3L;GNL3	GUANINE NUCLEOTIDE-BINDING PROTEIN-LIKE 3 HOMOLOG;GNL3L	GNL3L	GNL3_CAEEL;GNL3L	PUTATIVE GUANINE NUCLEOTIDE-BINDING PROTEIN-LIKE 3-LIKE PROTEIN;NUCLEOSTEMIN-LIKE PROTEIN	GNL3_CAEEL	GUANINE NUCLEOTIDE-BINDING PROTEIN-LIKE NSN1
6478	PORTHOMCL6478[AjBfCgCiDrGgMmOjOlPsSpXl|(13 genes, 12 taxa)]:	-0.467363	-0.92989	-0.466374	-0.0658578	-0.855858	-0.65525	-0.854974	-0.336058	-0.571794	0	0.239608	-0.578953	WDPCP	WDPCP	WDPCP	WDPCP.L;WDPCP	WDPCP	WDPCP	WD REPEAT-CONTAINING AND PLANAR CELL POLARITY EFFECTOR PROTEIN FRITZ HOMOLOG	WDPCP	FRITZ_HUMAN;WDPCP	HYPOTHETICAL PROTEIN;WDPCP		WD REPEAT-CONTAINING AND PLANAR CELL POLARITY EFFECTOR PROTEIN FRITZ HOMOLOG;WDPCP
1807	PORTHOMCL1807[AjBfCgCiDrGgLvMmOjOlPsSpXl|(22 genes, 13 taxa)]:	-0.447637	-0.744791	-0.535549	-0.844926	-0.720539	-0.911529	-0.195182	-0.203846	-0.420588	-0.403756	-0.448039	-0.5755	IARS	IARS	IARS	IARS.L;IARS.S;IARS	IARS	IARS	ISOLEUCINE--TRNA LIGASE, CYTOPLASMIC;ISOLEUCINE--TRNA LIGASE, CYTOPLASMIC-LIKE;IARS		SYIC_HUMAN;IARS	PUTATIVE ISOLEUCINE--TRNA LIGASE, CYTOPLASMIC ISOFORM X2;PUTATIVE ISOLEUCINE--TRNA LIGASE, CYTOPLASMIC-LIKE;PUTATIVE ISOLEUCINE--TRNA LIGASE, CYTOPLASMIC	SYIC_MOUSE;IARS	ISOLEUCINE--TRNA LIGASE, CYTOPLASMIC;IARS
5723	PORTHOMCL5723[AjBfCgCiDrGgLvMmOlPsSpXl|(14 genes, 12 taxa)]:	-0.44044	-0.739736	-0.629451	-0.84101	-0.711029	-0.0762941	-0.794636	-0.365944	0	-0.862931	-0.721892	-0.574818	FANCD2	FANCD2	FANCD2	FANCD2.L;FANCD2	FANCD2	FANCD2	FANCONI ANEMIA GROUP D2 PROTEIN	FANCD2		PUTATIVE FANCONI ANEMIA GROUP D2 PROTEIN-LIKE;FANCD2	FACD2_HUMAN;FANCD2	FANCONI ANEMIA GROUP D2 PROTEIN
3951	PORTHOMCL3951[AjBfCgCiDrGgLvMmOjOlPsSpXl|(16 genes, 13 taxa)]:	-0.582692	-0.737802	-0.517363	-0.718284	-0.602157	-0.678706	-0.0851429	-0.6417	0.413559	-0.643529	0.239338	-0.570481	PFDN4	PFDN4	PFDN4	PFDN4.S;LOC108700907;PFDN4	PFDN4	PFDN4	PREFOLDIN SUBUNIT 4-LIKE, TRANSCRIPT VARIANT X1; PREFOLDIN SUBUNIT 4-LIKE, TRANSCRIPT VARIANT X2;PFDN4	EOG090X0JBP	PFD4_BOVIN	HYPOTHETICAL PROTEIN;PUTATIVE PREFOLDIN SUBUNIT 4;PFDN4	PFD4_HUMAN	PREFOLDIN SUBUNIT 4;PFDN4
2826	PORTHOMCL2826[AjBfCgCiDrGgLvMmOjOlPsSpXl|(18 genes, 13 taxa)]:	-0.466813	-0.892571	-0.550549	-0.685147	-0.0645833	-0.610647	-0.880403	-0.406643	-0.703088	-0.809639	-0.650858	-0.56967	CDK1	CDK1	CDK1	CDK1.S;CDK1.L;CDK1	CDK1	CDK1	CYCLIN-DEPENDENT KINASE 1-LIKE;CDK1	CDK1	CDK1_CARAU;CDK1	PUTATIVE CYCLIN-DEPENDENT KINASE 8;CELL DIVISION CYCLE 2;CDK1	CDK1_RAT	CYCLIN-DEPENDENT KINASE 1;CDK1
4681	PORTHOMCL4681[AjBfCgCiDrGgLvMmOjOlPsSpXl|(15 genes, 13 taxa)]:	-0.693352	-0.90233	-0.476593	-0.927623	-0.0408824	-0.638971	-0.825558	-0.0365031	-0.171882	-0.553891	-0.803807	-0.567726	ORC5	ORC5	ORC5	ORC5.L;ORC5	ORC5	ORC5	ORIGIN RECOGNITION COMPLEX SUBUNIT 5-LIKE;ORC5	ORC5	ORC5_MOUSE;ORC5	PUTATIVE ORIGIN RECOGNITION COMPLEX SUBUNIT 5;ORC5	ORC5_MOUSE	ORIGIN RECOGNITION COMPLEX SUBUNIT 5;ORC5
7621	PORTHOMCL7621[AjBfCgCiDrGgMmOlPsXl|(12 genes, 10 taxa)]:	-0.65489	-0.515253	-0.768571	-0.43424	-0.753971	-0.548382	-0.784273	-0.0663804	0	0	0	-0.565745	RABL6	RABL6	RABL6	LOC108699873;RABL6.L;RABL6	RABL6B;RABL6	RABL6 (1 OF MANY);RABL6B;RABL6	RAB-LIKE PROTEIN 6;RABL6	RABL6		PUTATIVE RAB-LIKE PROTEIN 6;RABL6
1854	PORTHOMCL1854[AjBfCgCiDrGgLvMmOlPsSpXl|(22 genes, 12 taxa)]:	-0.727527	-0.70044	-0.353516	-0.241495	-0.741667	-0.189794	-0.891649	-0.671748	0	-0.487121	-0.673039	-0.56473	RBL1;RBL2	RBL1;RBL2	RBL1;RBL2	RBL1.L;LOC108714013;RBL2	RBL1	RBL1;RBL2	RETINOBLASTOMA-LIKE PROTEIN 2	RBL1		HYPOTHETICAL PROTEIN;PUTATIVE RETINOBLASTOMA-LIKE PROTEIN 1;RBL1	RBL1_HUMAN	RETINOBLASTOMA-LIKE PROTEIN 1;RBL2
5212	PORTHOMCL5212[AjBfCgCiDrGgLvMmOjOlPsSpXl|(14 genes, 13 taxa)]:	-0.556538	-0.744527	-0.758736	-0.218995	-0.43777	-0.393824	-0.635312	-0.763986	-0.702706	-0.701507	-0.337745	-0.563711	RFC2	RFC2	RFC2	RFC2.L;RFC2	RFC2	RFC2	REPLICATION FACTOR C SUBUNIT 2-LIKE, TRANSCRIPT VARIANT X1; REPLICATION FACTOR C SUBUNIT 2-LIKE, TRANSCRIPT VARIANT X2; REPLICATION FACTOR C SUBUNIT 2-LIKE, TRANSCRIPT VARIANT X3;RFC2	RFC2	RFC2_RAT;RFC2	PUTATIVE REPLICATION FACTOR C SUBUNIT 2;RFC2	RFC2_BOVIN;RFC2	REPLICATION FACTOR C SUBUNIT 2;RFC2
3831	PORTHOMCL3831[AjBfCgCiDrGgLvMmOjOlPsSpXl|(16 genes, 13 taxa)]:	-0.725989	-0.380703	-0.76522	-0.539166	-0.719681	-0.226765	-0.760532	-0.340559	-0.537029	-0.583839	0.172794	-0.557327	TBCE	TBCE	TBCE	TBCE.L;TBCE	TBCE	TBCE	TUBULIN-SPECIFIC CHAPERONE E-LIKE, TRANSCRIPT VARIANT X1; TUBULIN-SPECIFIC CHAPERONE E-LIKE, TRANSCRIPT VARIANT X2	TBCE	TBCE_RAT;TBCE	PUTATIVE TUBULIN-SPECIFIC CHAPERONE E;TBCE	TBCE_XENLA	TUBULIN-SPECIFIC CHAPERONE E;TUBULIN-SPECIFIC CHAPERONE E-LIKE;TBCE
5185	PORTHOMCL5185[AjBfCgCiDrGgMmOjOlPsSpXl|(14 genes, 12 taxa)]:	-0.195165	-0.652264	-0.525659	-0.849412	-0.455858	-0.343235	-0.771948	-0.660619	0.496029	0	-0.359436	-0.55677	NARS	NARS	NARS	NARS.L;NARS.S;NARS	NARS	NARS	ASPARAGINE--TRNA LIGASE, CYTOPLASMIC;NARS		SYNC_BOVIN;NARS	PUTATIVE ASPARAGINE--TRNA LIGASE, CYTOPLASMIC		ASPARAGINE--TRNA LIGASE, CYTOPLASMIC
5413	PORTHOMCL5413[AjBfCgCiDrGgMmOjOlPsSpXl|(14 genes, 12 taxa)]:	-0.534121	-0.73811	-0.551209	-0.473922	-0.394289	-0.000352941	-0.875	-0.878964	-0.748441	0	-0.566299	-0.555746	NOL8	NOL8	NOL8	NOL8.L	NOL8	NOL8	NUCLEOLAR PROTEIN 8-LIKE		NOL8_MOUSE	HYPOTHETICAL PROTEIN		NUCLEOLAR PROTEIN 8-LIKE
4605	PORTHOMCL4605[AjBfCgCiDrGgLvMmOlPsSpXl|(15 genes, 12 taxa)]:	-0.416099	-0.865978	-0.394286	-0.943284	-0.0338971	-0.295265	-0.801494	-0.69042	0	-0.322621	-0.687623	-0.55509	IPO5	IPO5	IPO4	IPO4.L;IPO4	IPO4	IPO4	IMPORTIN-4-LIKE	IPO4		HYPOTHETICAL PROTEIN;IPO4	IPO4_HUMAN;IPO4	IMPORTIN-4, TRANSCRIPT VARIANT X1; IMPORTIN-4, TRANSCRIPT VARIANT X2;IMPORTIN-4;IMPORTIN-4-LIKE;IPO4
8557	PORTHOMCL8557[AjBfCiDrGgMmOjOlPsXl|(10 genes, 10 taxa)]:	-0.480714	-0.799077	-0.516209	-0.620098	-0.0432598	-0.760735	-0.831416	-0.374476	0.290765	0	0	-0.553248	MRPL20	MRPL20	MRPL20	MRPL20.L;MRPL20	MRPL20	MRPL20	39S RIBOSOMAL PROTEIN L20, MITOCHONDRIAL-LIKE	MRPL20	RM20_MOUSE	PUTATIVE 39S RIBOSOMAL PROTEIN L20, MITOCHONDRIAL;RPLT
1453	PORTHOMCL1453[AjBfCgCiDrGgLvMmOjOlPsSpXl|(25 genes, 13 taxa)]:	-0.575	-0.877231	-0.552582	-0.81777	-0.313676	-0.522912	-0.604468	-0.159091	-0.230294	-0.606646	-0.483088	-0.552841	HSPH1;HSPA4;HSPA4L	HSPA4	HSPA4;HSPA4L	HSPH1.S;HSPA4.L;HSPA4.S;HSPH1;HSPA4	HSPA4A;HSPA4B	HSPA4A;HSPA4B;HSPA4L;HSPH1	HEAT SHOCK 70 KDA PROTEIN 4L;HSPA4L	HSPA4A;HSPA4	HSP97_STRFN;HSP97_STRPU	97 KDA HEAT SHOCK PROTEIN;HSPA4L	HSP97_STRFN	HEAT SHOCK 70 KDA PROTEIN IV-LIKE;EGG RECEPTOR FOR SPERM, TRANSCRIPT VARIANT X1; EGG RECEPTOR FOR SPERM
7704	PORTHOMCL7704[BfCgCiDrGgLvMmOjOlPsSpXl|(12 genes, 12 taxa)]:	-0.657418	-0.694769	-0.192527	-0.315858	-0.686539	-0.605	-0.652364	-0.59958	0.187324	-0.264768	-0.101103	-0.550507	DHCR7	DHCR7	DHCR7	DHCR7.S	DHCR7	DHCR7	7-DEHYDROCHOLESTEROL REDUCTASE;DHCR7	DHCR7	DHCR7_XENTR;DHCR7		DHCR7_XENTR	7-DEHYDROCHOLESTEROL REDUCTASE, TRANSCRIPT VARIANT X2; 7-DEHYDROCHOLESTEROL REDUCTASE, TRANSCRIPT VARIANT X3; 7-DEHYDROCHOLESTEROL REDUCTASE, TRANSCRIPT VARIANT X1;DHCR7
3566	PORTHOMCL3566[AjBfCgCiDrGgLvMmOjOlPsSpXl|(17 genes, 13 taxa)]:	-0.337253	-0.534154	-0.699396	-0.657549	-0.65174	-0.589294	-0.529675	-0.389371	-0.779235	-0.481837	-0.148407	-0.548554	NUBP1	NUBP1	NUBP1	NUBP1.S;NUBP1.L;NUBP1	NUBP1	NUBP1	CYTOSOLIC FE-S CLUSTER ASSEMBLY FACTOR NUBP1 HOMOLOG		NUP1A_XENLA;NUBP1	PUTATIVE CYTOSOLIC FE-S CLUSTER ASSEMBLY FACTOR NUBP1-B ISOFORM X1;NUBP1	NUP1B_XENLA;NUBP1	CYTOSOLIC FE-S CLUSTER ASSEMBLY FACTOR NUBP1-B, TRANSCRIPT VARIANT X2; CYTOSOLIC FE-S CLUSTER ASSEMBLY FACTOR NUBP1-B, TRANSCRIPT VARIANT X1;CYTOSOLIC FE-S CLUSTER ASSEMBLY FACTOR NUBP2 HOMOLOG;NUBP1;NBP35
4036	PORTHOMCL4036[AjBfCgCiDrGgLvMmOjOlPsSpXl|(16 genes, 13 taxa)]:	-0.203791	-0.330505	-0.566978	-0.599191	-0.286348	-0.752647	-0.873584	-0.774653	-0.852265	-0.74419	0.092402	-0.548462	LIAS	LIAS	LIAS	LIAS.S;LIAS.L	LIAS	LIAS	LIPOYL SYNTHASE, MITOCHONDRIAL-LIKE, TRANSCRIPT VARIANT X3; LIPOYL SYNTHASE, MITOCHONDRIAL-LIKE, TRANSCRIPT VARIANT X1; LIPOYL SYNTHASE, MITOCHONDRIAL-LIKE, TRANSCRIPT VARIANT X2;LIAS	LIAS	LIAS_BOVIN;LIAS	PUTATIVE LIPOYL SYNTHASE, MITOCHONDRIAL;LIAS	LIAS_BRAFL;LIAS	LIPOYL SYNTHASE, MITOCHONDRIAL;LIAS
4274	PORTHOMCL4274[BfCgCiDrGgLvMmOjOlPsSpXl|(16 genes, 12 taxa)]:	-0.473077	-0.781802	-0.557198	-0.741593	-0.14701	-0.278647	-0.858122	-0.544691	-0.6415	-0.168277	0.179167	-0.547767	THUMPD3	THUMPD3	THUMPD3	THUMPD3.L;THUMPD3	THUMPD3	THUMPD3	THUMP DOMAIN-CONTAINING PROTEIN 3-LIKE, TRANSCRIPT VARIANT X2; THUMP DOMAIN-CONTAINING PROTEIN 3-LIKE, TRANSCRIPT VARIANT X1		THUM3_BOVIN;THUMPD3		THUM3_MOUSE;THUM3_BOVIN	THUMP DOMAIN-CONTAINING PROTEIN 3-LIKE;THUMP DOMAIN-CONTAINING PROTEIN 3;THUMPD3
4884	PORTHOMCL4884[AjBfCgCiDrGgLvMmOjOlPsSpXl|(15 genes, 13 taxa)]:	-0.337253	-0.80022	-0.805	-0.722304	-0.255	-0.422	-0.625182	-0.413667	-0.0332353	-0.158163	-0.585172	-0.547578	ELP4	ELP4	ELP4	ELP4.S;ELP4	ELP4	ELP4	PUTATIVE ELONGATOR COMPLEX PROTEIN 4, TRANSCRIPT VARIANT X2; PUTATIVE ELONGATOR COMPLEX PROTEIN 4, TRANSCRIPT VARIANT X1; PUTATIVE ELONGATOR COMPLEX PROTEIN 4, TRANSCRIPT VARIANT X3	ELP4	ELP4_XENLA;ELP4	PUTATIVE ELONGATOR COMPLEX PROTEIN 4-LIKE;ELP4	ELP4_BOVIN	ELONGATOR COMPLEX PROTEIN 4-LIKE;ELONGATOR COMPLEX PROTEIN 4;ELP4
6323	PORTHOMCL6323[AjBfCgCiDrGgLvMmOjOlPsSpXl|(13 genes, 13 taxa)]:	-0.32033	-0.769407	-0.559396	-0.289608	-0.711961	-0.680853	-0.847169	-0.193306	0.717618	0.172776	0.267034	-0.546504	NUDCD2	NUDCD2	NUDCD2	NUDCD2.L;NUDCD2	NUDCD2	NUDCD2	NUDC DOMAIN-CONTAINING PROTEIN 2-LIKE	NUDCD2	NUDC2_RAT	PUTATIVE NUDC DOMAIN-CONTAINING PROTEIN 2 ISOFORM X1;NUDCD2	NUDC2_RAT	NUDC DOMAIN-CONTAINING PROTEIN 2, TRANSCRIPT VARIANT X2; NUDC DOMAIN-CONTAINING PROTEIN 2, TRANSCRIPT VARIANT X1;NUDCD2
6394	PORTHOMCL6394[AjBfCgCiDrGgMmOjOlPsSpXl|(13 genes, 12 taxa)]:	-0.495	-0.683956	-0.546648	-0.265245	-0.548284	-0.232294	-0.691091	-0.902851	-0.843647	0	-0.660294	-0.545671	RSL1D1	RSL1D1	RSL1D1	LOC733385;RSL1D1.L;RSL1D1	RSL1D1	RSL1D1	RIBOSOMAL L1 DOMAIN-CONTAINING PROTEIN 1-LIKE		RL1D1_MOUSE	PUTATIVE RIBOSOMAL L1 DOMAIN-CONTAINING PROTEIN 1		RIBOSOMAL L1 DOMAIN-CONTAINING PROTEIN 1
4121	PORTHOMCL4121[AjBfCgCiDrGgLvMmOjOlPsSpXl|(16 genes, 13 taxa)]:	-0.220495	-0.644571	-0.640275	-0.239387	-0.383799	-0.754261	-0.891429	-0.581812	-0.426294	-0.420557	0.516299	-0.544503	BECN1	BECN1	BECN1;GM38100;BECN2	LOC108701789;LOC108702722;BECN1	BECN1	BECN1	BECLIN-1	BECN1	BECN1_XENLA;BECN1	PUTATIVE BECLIN-1;BECN1	BECN1_PIG;BECN1	BECLIN-1;BECN1
6575	PORTHOMCL6575[AjBfCgCiDrGgLvMmOjOlPsSpXl|(13 genes, 13 taxa)]:	-0.271099	-0.837407	-0.54489	-0.156429	-0.504975	-0.745	-0.672442	-0.609088	0.757647	0.182577	-0.562532	-0.542666	HDHD2	HDHD2	HDHD2	HDHD2.L;HDHD2	HDHD2	HDHD2	HALOACID DEHALOGENASE-LIKE HYDROLASE DOMAIN-CONTAINING PROTEIN 2;HDHD2	HDHD2	HDHD2_RAT;HDHD2	PUTATIVE HALOACID DEHALOGENASE-LIKE HYDROLASE DOMAIN-CONTAINING PROTEIN 2;HDHD2	HDHD2_DANRE;HDHD2	HALOACID DEHALOGENASE-LIKE HYDROLASE DOMAIN-CONTAINING PROTEIN 2;HDHD2
6836	PORTHOMCL6836[BfCgCiDrGgMmOjOlPsSpXl|(13 genes, 11 taxa)]:	-0.458736	-0.870769	-0.643022	-0.673848	-0.116961	-0.3145	-0.813364	-0.440209	-0.500618	0	-0.252083	-0.541426	TTF2	TTF2	TTF2	TTF2.S;TTF2	TRANSCRIPTION TERMINATION FACTOR 2;TTF2	TTF2	TRANSCRIPTION TERMINATION FACTOR 2-LIKE	TTF2	TTF2_MOUSE;TTF2			TRANSCRIPTION TERMINATION FACTOR 2;TRANSCRIPTION TERMINATION FACTOR 2, TRANSCRIPT VARIANT X1; TRANSCRIPTION TERMINATION FACTOR 2, TRANSCRIPT VARIANT X2;TRANSCRIPTION TERMINATION FACTOR 2-LIKE;TTF2
6704	PORTHOMCL6704[AjBfCiDrGgLvMmOjOlPsSpXl|(13 genes, 12 taxa)]:	-0.110549	-0.867956	-0.592747	-0.0302451	-0.263725	-0.756824	-0.87826	-0.79753	-0.565735	-0.252941	-0.561251	-0.53723	TAMM41	TAMM41	TAMM41	TAMM41.S;TAMM41	TAMM41	TAMM41	PHOSPHATIDATE CYTIDYLYLTRANSFERASE, MITOCHONDRIAL-LIKE;TAMM41		TAM41_MOUSE;TAM41_DANRE;TAMM41	PUTATIVE MMP37-LIKE PROTEIN, MITOCHONDRIAL ISOFORM X1	TAM41_DANRE	MMP37-LIKE PROTEIN, MITOCHONDRIAL, TRANSCRIPT VARIANT X1; MMP37-LIKE PROTEIN, MITOCHONDRIAL;TAMM41
9939	PORTHOMCL9939[BfCiDrGgMmOlPsXl|(8 genes, 8 taxa)]:	-0.216319	-0.224088	-0.471154	-0.86951	-0.584044	-0.932029	-0.825039	-0.170682	0	0	0	-0.536608	MRPL10	MRPL10	MRPL10	MRPL10.S;MRPL10	MRPL10	MRPL10	UNCHARACTERIZED LOC100178933
1200	PORTHOMCL1200[AjBfCgCiDrGgLvMmOjOlPsSpXl|(27 genes, 13 taxa)]:	-0.303242	-0.498681	-0.534945	-0.612442	-0.583873	-0.207324	-0.854143	-0.693257	0	-0.311714	-0.462265	-0.535988	DNMT3B;DNMT3A	DNMT3B;DNMT3L	DNMT3A;DNMT3B;DNMT3L	LOC108701970;LOC108716062;LOC108718324;DNMT3A	DNMT3AA;DNMT3BB.1;DNMT3BA;DNMT3BB.2	DNMT3BA;DNMT3AB;DNMT3AA;DNMT3BB.1;DNMT3BB.3;DNMT3A;DNMT3B	DNA (CYTOSINE-5)-METHYLTRANSFERASE 3A-LIKE;DNA (CYTOSINE-5)-METHYLTRANSFERASE 3A-LIKE, TRANSCRIPT VARIANT X1; DNA (CYTOSINE-5)-METHYLTRANSFERASE 3A-LIKE, TRANSCRIPT VARIANT X2		DNM3A_CHICK	PUTATIVE DNA (CYTOSINE-5)-METHYLTRANSFERASE 3B ISOFORM X8	DNM3B_MOUSE	DNA (CYTOSINE-5)-METHYLTRANSFERASE 3A
3886	PORTHOMCL3886[AjBfCgCiDrGgLvMmOjOlPsSpXl|(16 genes, 13 taxa)]:	-0.500989	-0.570418	-0.551374	-0.665417	-0.546544	-0.237088	-0.706468	-0.509161	-0.922912	-0.852405	-0.413235	-0.535932	MAK16	MAK16	MAK16	MAK16.S;MAK16.L	MAK16	MAK16	PROTEIN MAK16 HOMOLOG		MAK16_HUMAN	HYPOTHETICAL PROTEIN	MAK16_BOVIN	PROTEIN MAK16 HOMOLOG
3286	PORTHOMCL3286[AjBfCgCiDrGgLvMmOjOlPsSpXl|(17 genes, 13 taxa)]:	-0.0596703	-0.501758	-0.751593	-0.428897	-0.839461	-0.427324	-0.888247	-0.384549	0.704706	0.453271	0.265319	-0.535187	TRAF6	TRAF6	TRAF6	TRAF6.S	TRAF6	TRAF6	ZINC FINGER PROTEIN		TRAF6_BOVIN	TUMOR NECROSIS FACTOR RECEPTOR-ASSOCIATED FACTOR 6	TRF6A_XENLA;TRF6B_XENLA;TRAF6_HUMAN	TNF RECEPTOR-ASSOCIATED FACTOR 6-A, TRANSCRIPT VARIANT X2; TNF RECEPTOR-ASSOCIATED FACTOR 6-A, TRANSCRIPT VARIANT X1; TNF RECEPTOR-ASSOCIATED FACTOR 6-A, TRANSCRIPT VARIANT X3
3699	PORTHOMCL3699[AjBfCgCiDrGgMmOjOlPsSpXl|(16 genes, 12 taxa)]:	-0.342692	-0.692659	-0.904231	-0.22049	-0.0432843	-0.685441	-0.86713	-0.522086	0.317977	0	-0.179644	-0.534752	YEATS2	YEATS2	YEATS2	YEATS2.L;YEATS2	YEATS2	YEATS2	YEATS DOMAIN-CONTAINING PROTEIN 2		YETS2_HUMAN	PUTATIVE YEATS DOMAIN-CONTAINING PROTEIN 2		YEATS DOMAIN-CONTAINING PROTEIN 2
6187	PORTHOMCL6187[AjBfCgCiDrGgLvMmOjOlPsSpXl|(13 genes, 13 taxa)]:	-0.0445055	-0.326505	-0.475659	-0.838162	-0.765809	-0.748874	-0.676532	-0.385216	-0.567735	-0.630609	-0.224877	-0.532658	MRPL24	MRPL24	MRPL24	MRPL24.L;MRPL24	MRPL24	MRPL24	39S RIBOSOMAL PROTEIN L24, MITOCHONDRIAL, TRANSCRIPT VARIANT X1; 39S RIBOSOMAL PROTEIN L24, MITOCHONDRIAL, TRANSCRIPT VARIANT X2;MRPL24	MRPL24		PUTATIVE 39S RIBOSOMAL PROTEIN L24, MITOCHONDRIAL;MRPL24	RM24_DROME	39S RIBOSOMAL PROTEIN L24, MITOCHONDRIAL
5261	PORTHOMCL5261[AjBfCgCiDrGgLvMmOjOlPsSpXl|(14 genes, 13 taxa)]:	-0.0542857	-0.684659	-0.48467	-0.895564	-0.07125	-0.668265	-0.550792	-0.833035	-0.833294	-0.18937	-0.370833	-0.530315	GFM2	GFM2	GFM2	GFM2.L;GFM2	GFM2	GFM2	RIBOSOME-RELEASING FACTOR 2, MITOCHONDRIAL, TRANSCRIPT VARIANT X3; RIBOSOME-RELEASING FACTOR 2, MITOCHONDRIAL, TRANSCRIPT VARIANT X2; RIBOSOME-RELEASING FACTOR 2, MITOCHONDRIAL, TRANSCRIPT VARIANT X1;GFM2	GFM2	RRF2M_BOVIN	PUTATIVE RIBOSOME-RELEASING FACTOR 2, MITOCHONDRIAL;GFM2	RRF2M_MOUSE	RIBOSOME-RELEASING FACTOR 2, MITOCHONDRIAL;GFM2
1409	PORTHOMCL1409[AjBfCgCiDrGgLvMmOjOlPsSpXl|(25 genes, 13 taxa)]:	-0.422473	-0.132527	-0.540824	-0.229657	-0.814363	-0.568941	-0.839494	-0.686364	0.0168235	0.139608	-0.0770833	-0.52933	IMPDH	IMPDH2	IMPDH2;IMPDH1	IMPDH2.S;IMPDH1.L;LOC108713018;IMPDH2.L;IMPDH2;IMPDH	IMPDH2;IMPDH1B;IMPDH1A;IMPDH	IMPDH2;IMPDH1A;IMPDH1B;IMPDH	INOSINE-5'-MONOPHOSPHATE DEHYDROGENASE 2, TRANSCRIPT VARIANT X1; INOSINE-5'-MONOPHOSPHATE DEHYDROGENASE 2, TRANSCRIPT VARIANT X2; INOSINE-5'-MONOPHOSPHATE DEHYDROGENASE 2, TRANSCRIPT VARIANT X3;IMPDH		IMDH1_DANRE	PUTATIVE INOSINE-5'-MONOPHOSPHATE DEHYDROGENASE 1B ISOFORM X4;PUTATIVE INOSINE-5'-MONOPHOSPHATE DEHYDROGENASE 1B ISOFORM X2	IMDH1_DANRE	INOSINE-5'-MONOPHOSPHATE DEHYDROGENASE 1B, TRANSCRIPT VARIANT X4; INOSINE-5'-MONOPHOSPHATE DEHYDROGENASE 1B, TRANSCRIPT VARIANT X2; INOSINE-5'-MONOPHOSPHATE DEHYDROGENASE 1B, TRANSCRIPT VARIANT X3; INOSINE-5'-MONOPHOSPHATE DEHYDROGENASE 1B, TRANSCRIPT VARIANT X1
7179	PORTHOMCL7179[AjBfCgCiDrGgMmOjOlPsSpXl|(12 genes, 12 taxa)]:	-0.423956	-0.824615	-0.303681	-0.0724755	-0.584534	-0.818794	-0.865221	-0.341259	-0.818088	0	-0.4625	-0.529317	MRPS17	MRPS17	MRPS17	MRPS17.L;MRPS17	MRPS17	MRPS17	28S RIBOSOMAL PROTEIN S17, MITOCHONDRIAL-LIKE, TRANSCRIPT VARIANT X2; 28S RIBOSOMAL PROTEIN S17, MITOCHONDRIAL-LIKE, TRANSCRIPT VARIANT X1		RT17_HUMAN	PUTATIVE 28S RIBOSOMAL PROTEIN S17, MITOCHONDRIAL-LIKE		28S RIBOSOMAL PROTEIN S17, MITOCHONDRIAL-LIKE
945	PORTHOMCL945[AjBfCgCiDrGgLvMmOjOlPsSpXl|(30 genes, 13 taxa)]:	-0.335934	-0.643209	-0.592418	-0.480245	-0.347672	-0.324676	-0.629857	-0.877272	-0.181941	-0.756078	0.0194853	-0.52891	EIF4G1;EIF4G3	EIF4G3	EIF4G3;EIF4G1	EIF4G1.S;LOC108696834;EIF4G1.L;EIF4G1	EUKARYOTIC TRANSLATION INITIATION FACTOR 4 GAMMA 1;EIF4G1;EIF4G3A;EIF4G3	CABZ01085052.1;EIF4G3A;EIF4G3B;EIF4G1A;EIF4G1	EUKARYOTIC TRANSLATION INITIATION FACTOR 4 GAMMA 3		IF4G1_HUMAN	PUTATIVE EUKARYOTIC TRANSLATION INITIATION FACTOR 4 GAMMA 1;EUKARYOTIC INITIATION FACTOR 4G;PUTATIVE EUKARYOTIC TRANSLATION INITIATION FACTOR 4 GAMMA 3-LIKE	IF4G3_HUMAN	EUKARYOTIC TRANSLATION INITIATION FACTOR 4 GAMMA 1
1433	PORTHOMCL1433[AjBfCgCiDrGgLvMmOjOlPsSpXl|(25 genes, 13 taxa)]:	-0.607033	-0.323121	-0.46967	-0.899289	-0.148652	-0.449912	-0.795104	-0.538427	-0.497853	-0.071806	-0.231373	-0.528901	KPNA6;KPNA5;KPNA1	KPNA6	KPNA6;KPNA1	KPNA6.L;KPNA1.S	KPNA6	KPNA6;KPNA5;KPNA1	IMPORTIN SUBUNIT ALPHA-7;KPNA6	KPNA6	IMA7_PONAB;IMA6_RAT;KPNA6	PUTATIVE IMPORTIN SUBUNIT ALPHA-7 ISOFORM X1	IMA7_BOVIN;IMA6_RAT;KPNA6	IMPORTIN SUBUNIT ALPHA-7, TRANSCRIPT VARIANT X2; IMPORTIN SUBUNIT ALPHA-7, TRANSCRIPT VARIANT X3; IMPORTIN SUBUNIT ALPHA-7, TRANSCRIPT VARIANT X1;IMPORTIN SUBUNIT ALPHA-7;KINESIN-RELATED PROTEIN 4;KPNA6
6121	PORTHOMCL6121[AjBfCgCiDrGgMmOjOlPsSpXl|(13 genes, 12 taxa)]:	-0.521978	-0.643956	-0.544121	-0.238922	-0.56424	-0.342706	-0.834818	-0.536014	-0.885265	0	-0.702941	-0.528344	EMG1	EMG1	EMG1	EMG1.S;EMG1	EMG1	EMG1	RIBOSOMAL RNA SMALL SUBUNIT METHYLTRANSFERASE NEP1-LIKE;EMG1	EMG1	NEP1_MOUSE;EMG1	PUTATIVE RIBOSOMAL RNA SMALL SUBUNIT METHYLTRANSFERASE NEP1;EMG1		RIBOSOMAL RNA SMALL SUBUNIT METHYLTRANSFERASE NEP1;EMG1
6376	PORTHOMCL6376[AjBfCgCiDrGgMmOlPsSpXl|(13 genes, 11 taxa)]:	-0.313077	-0.691604	-0.757088	-0.294289	-0.291912	-0.367147	-0.666696	-0.842587	0	0	0.197591	-0.52805	SRRD	SRRD	SRRD	SRRD.L;SRRD	SRRD	SRRD	SRR1-LIKE PROTEIN	SRRD		PUTATIVE SRR1-LIKE PROTEIN-LIKE;SRRD		SRR1-LIKE PROTEIN;SRRD
5657	PORTHOMCL5657[AjBfCgCiDrGgLvMmOjOlPsSpXl|(14 genes, 13 taxa)]:	-0.193901	-0.925319	-0.258352	-0.0845098	-0.666985	-0.584088	-0.819065	-0.687413	-0.0964412	0.527258	-0.109314	-0.527454	CRYZL1	CRYZL1	CRYZL1	CRYZL1.L;CRYZL1	CRYZL1	CRYZL1	QUINONE OXIDOREDUCTASE-LIKE PROTEIN 1		PKS1_DICDI	PUTATIVE QUINONE OXIDOREDUCTASE-LIKE PROTEIN 1 ISOFORM X2;HYPOTHETICAL PROTEIN;CRYZL1	QORL1_BOVIN;CRYZL1	QUINONE OXIDOREDUCTASE-LIKE PROTEIN 1, TRANSCRIPT VARIANT X2; QUINONE OXIDOREDUCTASE-LIKE PROTEIN 1, TRANSCRIPT VARIANT X1;CRYZL1
1428	PORTHOMCL1428[AjBfCgCiDrGgMmOjOlPsSpXl|(25 genes, 12 taxa)]:	-0.71467	-0.458725	-0.473626	-0.423162	-0.224069	-0.550471	-0.591792	-0.780281	-0.322765	0	0.700368	-0.5271	XPNPEP1;XPNPEP2	XPNPEP1	XPNPEP1	XPNPEP1.L;XPNPEP1	XPNPEP1	XPNPEP1	XAA-PRO AMINOPEPTIDASE 1;XPNPEP2	XPNPEP1	XPP1_HUMAN;XPP2_HUMAN;XPNPEP1	PUTATIVE XAA-PRO AMINOPEPTIDASE 1 ISOFORM X1;HYPOTHETICAL PROTEIN;XPNPEP1		XAA-PRO AMINOPEPTIDASE 1, TRANSCRIPT VARIANT X4; XAA-PRO AMINOPEPTIDASE 1, TRANSCRIPT VARIANT X3; XAA-PRO AMINOPEPTIDASE 1, TRANSCRIPT VARIANT X2; XAA-PRO AMINOPEPTIDASE 1, TRANSCRIPT VARIANT X1;PROBABLE XAA-PRO AMINOPEPTIDASE P;XAA-PRO AMINOPEPTIDASE 1-LIKE, TRANSCRIPT VARIANT X2; XAA-PRO AMINOPEPTIDASE 1-LIKE, TRANSCRIPT VARIANT X1;XAA-PRO AMINOPEPTIDASE 1, TRANSCRIPT VARIANT X1; XAA-PRO AMINOP…
4731	PORTHOMCL4731[AjBfCgCiDrGgLvMmOjOlPsSpXl|(15 genes, 13 taxa)]:	-0.589231	-0.749714	-0.521593	-0.215343	-0.502868	-0.574176	-0.805286	-0.236017	-0.105235	-0.761362	-0.202819	-0.524279	EIF2B;EIF2S2	EIF2S2	EIF2S2	EIF2S2.S;EIF2S2.L;EIF2S2	EIF2S2	EIF2S2	TRANSLATION INITIATION FACTOR	EIF2S2	IF2B_MOUSE	PUTATIVE EUKARYOTIC TRANSLATION INITIATION FACTOR 2 SUBUNIT 2-LIKE;EIF2S2	IF2B_RABIT;IF2B_HUMAN	EUKARYOTIC TRANSLATION INITIATION FACTOR 2 SUBUNIT 2;EIF2S2
4662	PORTHOMCL4662[AjBfCgCiDrGgMmOjOlPsSpXl|(15 genes, 12 taxa)]:	-0.451813	-0.631385	-0.578571	-0.0368137	-0.780882	-0.210118	-0.880597	-0.614051	0.705118	0	0.178309	-0.523029	COPS8	COPS8	COPS8	COPS8.L;COPS8.S;COPS8	COPS8	COPS8	COP9 SIGNALOSOME COMPLEX SUBUNIT 8-LIKE	COPS8	CSN8_RAT;COPS8	COP9 SIGNALOSOME COMPLEX SUBUNIT 8;PUTATIVE COP9 SIGNALOSOME COMPLEX SUBUNIT 8		COP9 SIGNALOSOME COMPLEX SUBUNIT 8;COPS8
4495	PORTHOMCL4495[AjBfCgCiDrGgLvMmOlPsSpXl|(15 genes, 12 taxa)]:	-0.363516	-0.739121	-0.534011	-0.930931	-0.119387	-0.525765	-0.644519	-0.322969	0	0.17193	-0.160784	-0.522528	PSMA5	PSMA5	PSMA5	PSMA5.L;PSMA5.S;PSMA5	PSMA5	PSMA5	PROTEASOME SUBUNIT ALPHA TYPE-5-LIKE;PSMA5	PSMA5		HYPOTHETICAL PROTEIN;PUTATIVE PROTEASOME SUBUNIT ALPHA TYPE-5;PSMA5	PSA5_MOUSE;PSMA5	PROTEASOME SUBUNIT ALPHA TYPE-5;PSMA5
2303	PORTHOMCL2303[AjBfCgCiDrGgLvMmOjOlPsSpXl|(20 genes, 13 taxa)]:	-0.470385	-0.658637	-0.57022	-0.730907	-0.404314	-0.275324	-0.436416	-0.633497	0.780315	0.682155	-0.0163391	-0.522462	DDX1	DDX1	DDX1	DDX1.L;DDX1	DDX1	DDX1	ATP-DEPENDENT RNA HELICASE DDX1-LIKE;DDX1	DDX1	DDX1_CHICK;DDX1_DROME;DDX1	HYPOTHETICAL PROTEIN;PUTATIVE ATP-DEPENDENT RNA HELICASE DDX1;DDX1	DDX1_XENLA;DDX1_BOVIN	ATP-DEPENDENT RNA HELICASE DDX1
6357	PORTHOMCL6357[AjBfCgCiDrGgLvMmOjOlPsSpXl|(13 genes, 13 taxa)]:	-0.170549	-0.763473	-0.474396	-0.106005	-0.485074	-0.861238	-0.88187	-0.432739	-0.582588	-0.463013	0.145711	-0.521918	ALG12	ALG12	ALG12	ALG12.L;ALG12	ALG12	ALG12	DOL-P-MAN:MAN(7)GLCNAC(2)-PP-DOL ALPHA-1,6-MANNOSYLTRANSFERASE;ALG12	ALG12	ALG12_MOUSE;EOG090X04MD	PUTATIVE DOL-P-MAN:MAN(7)GLCNAC(2)-PP-DOL ALPHA-1,6-MANNOSYLTRANSFERASE	ALG12_MOUSE;ALG12	DOL-P-MAN:MAN(7)GLCNAC(2)-PP-DOL ALPHA-1,6-MANNOSYLTRANSFERASE
3091	PORTHOMCL3091[AjBfCgCiDrGgLvMmOjOlPsSpXl|(18 genes, 13 taxa)]:	-0.183516	-0.772923	-0.738901	-0.485417	-0.063848	-0.845029	-0.727584	-0.356084	-0.406853	0.274857	-0.161642	-0.521663	NDUFAF5	NDUFAF5	NDUFAF5	NDUFAF5.L;NDUFAF5	NDUFAF5	NDUFAF5	NADH DEHYDROGENASE [UBIQUINONE] 1 ALPHA SUBCOMPLEX ASSEMBLY FACTOR 5-LIKE;NDUFAF5		NDUF5_DANRE;NDUFAF5	PUTATIVE NADH DEHYDROGENASE;NDUFAF5	NDUF5_DANRE;NDUF5_PONAB	NADH DEHYDROGENASE [UBIQUINONE] 1 ALPHA SUBCOMPLEX ASSEMBLY FACTOR 5
6716	PORTHOMCL6716[AjBfCgCiDrGgLvMmOjOlPsSpXl|(13 genes, 13 taxa)]:	-0.357033	-0.685363	-0.242747	-0.77799	-0.152451	-0.784928	-0.805013	-0.339455	-0.714706	0.0709391	-0.24424	-0.518122	MRRF	MRRF	MRRF	MRRF.L;MRRF	MRRF	MRRF	RIBOSOME-RECYCLING FACTOR, MITOCHONDRIAL-LIKE	MRRF	RRFM_BOVIN;MRRF	PUTATIVE RIBOSOME-RECYCLING FACTOR, MITOCHONDRIAL ISOFORM X2;MRRF	RRFM_MOUSE	RIBOSOME-RECYCLING FACTOR, MITOCHONDRIAL, TRANSCRIPT VARIANT X1; RIBOSOME-RECYCLING FACTOR, MITOCHONDRIAL, TRANSCRIPT VARIANT X2;MRRF
1292	PORTHOMCL1292[AjBfCgCiDrGgLvMmOjOlPsSpXl|(26 genes, 13 taxa)]:	-0.25467	-0.830813	-0.62	-0.310441	-0.449191	-0.0471471	-0.756325	-0.872753	-0.393735	-0.802559	0.748652	-0.517668	MPP6;MPP2	MPP6	MPP6;MPP2	MPP6.S;LOC108705310;MPP2.S;MPP6	MAGUK P55 SUBFAMILY MEMBER 6;MPP6A;MPP2B;MPP2A;MPP6B	MPP6A;MPP6B;MPP2B;MPP2A	MAGUK P55 SUBFAMILY MEMBER 6-LIKE;MPP6	MPP6	MPP6_MOUSE;MPP2	PUTATIVE MAGUK P55 SUBFAMILY MEMBER 6	MPP6_MOUSE;CSKP_HUMAN;CASK	MAGUK P55 SUBFAMILY MEMBER 6, TRANSCRIPT VARIANT X2; MAGUK P55 SUBFAMILY MEMBER 6, TRANSCRIPT VARIANT X1;MPP2
2931	PORTHOMCL2931[AjBfCgCiDrGgLvMmOjOlPsSpXl|(18 genes, 13 taxa)]:	-0.748681	-0.699736	-0.501264	-0.226912	-0.84201	-0.0588824	-0.896857	-0.157133	-0.200294	0.541094	-0.583333	-0.516434	FEN1	FEN1	FEN1	FEN1.S;FEN1.L;LOC108696916;FEN1	FEN1;ZGC:110269	ZGC:110269;FEN1	FLAP ENDONUCLEASE 1;FEN1	FEN1	FEN1_NEMVE;FEN1	PUTATIVE FLAP ENDONUCLEASE 1-LIKE;FEN1	FEN1_XIPMA;FEN1	FLAP ENDONUCLEASE 1;FEN1
6696	PORTHOMCL6696[AjBfCgCiDrGgLvMmOjOlPsSpXl|(13 genes, 13 taxa)]:	-0.357473	-0.569407	-0.458516	-0.750931	-0.537647	-0.223529	-0.85826	-0.341023	-0.586353	0.0758358	-0.516667	-0.512098	PDCD2	PDCD2	PDCD2	PDCD2.S;PDCD2	PDCD2	PDCD2	PROGRAMMED CELL DEATH PROTEIN 2;PDCD2	PDCD2	PDCD2_BOVIN;PDCD2	PROGRAMMED CELL DEATH PROTEIN 2;PDCD2	PDCD2_MOUSE	PROGRAMMED CELL DEATH PROTEIN 2
3771	PORTHOMCL3771[AjBfCgCiDrGgLvMmOjOlPsSpXl|(16 genes, 13 taxa)]:	-0.450824	-0.610725	-0.533626	-0.326544	-0.686691	-0.161794	-0.508429	-0.817851	-0.4855	-0.746151	-0.606127	-0.512061	SEC13	SEC13	SEC13	LOC108714639	SEC13	SEC13	PROTEIN SEC13 HOMOLOG;SEC13	SEC13	SEC13_HUMAN;SEC13	HYPOTHETICAL PROTEIN;PUTATIVE TRIPARTITE MOTIF-CONTAINING PROTEIN 2-LIKE;SEC13	SEC13_RAT;SEC13	PROTEIN SEC13 HOMOLOG;SEC13
3850	PORTHOMCL3850[AjBfCgCiDrGgLvMmOjOlPsSpXl|(16 genes, 13 taxa)]:	-0.363846	-0.819692	-0.645275	-0.737843	-0.0879657	-0.113235	-0.902156	-0.419529	0.471206	-0.466226	-0.612377	-0.511193	IPO11	IPO11	IPO11	IPO11.S;IPO11	IPO11	IPO11	IMPORTIN-11-LIKE	IPO11	IPO11_HUMAN;IPO11	PUTATIVE IMPORTIN-11	IPO11_HUMAN;IPO11_MOUSE;IPO11	IMPORTIN-11, TRANSCRIPT VARIANT X1; IMPORTIN-11, TRANSCRIPT VARIANT X2;IPO11
5622	PORTHOMCL5622[AjBfCgCiDrGgLvMmOjOlPsSpXl|(14 genes, 13 taxa)]:	-0.393901	-0.143736	-0.54978	-0.808554	-0.403897	-0.777147	-0.681506	-0.313566	0.124735	-0.0364706	-0.439951	-0.509011	PSMC5	PSMC5	PSMC5	PSMC5	PSMC5	PSMC5	26S PROTEASE REGULATORY SUBUNIT 8;PSMC5	PSMC5	PRS8_MANSE	PUTATIVE 26S PROTEASE REGULATORY SUBUNIT 8;PSMC5	PRS8_MANSE	26S PROTEASE REGULATORY SUBUNIT 8
6093	PORTHOMCL6093[AjBfCgCiDrGgLvMmOjOlPsSpXl|(13 genes, 13 taxa)]:	-0.287143	-0.569538	-0.542308	-0.191225	-0.898407	-0.743882	-0.703935	-0.129943	-0.908588	-0.476574	-0.310417	-0.508298	PSMD13	PSMD13	PSMD13	PSMD13.S;PSMD13	PSMD13	PSMD13	26S PROTEASOME NON-ATPASE REGULATORY SUBUNIT 13-LIKE;PSMD13	PSMD13	PSD13_CHICK;PSMD13	PUTATIVE 26S PROTEASOME NON-ATPASE REGULATORY SUBUNIT 13-LIKE;PSMD13	PSD13_CHICK	26S PROTEASOME NON-ATPASE REGULATORY SUBUNIT 13;PSMD13
3892	PORTHOMCL3892[AjBfCgCiDrGgLvMmOjOlPsSpXl|(16 genes, 13 taxa)]:	-0.0414835	-0.382198	-0.913681	-0.322377	-0.78402	-0.546912	-0.75639	-0.305699	0.734765	-0.505593	-0.582108	-0.506595	ANAPC2	ANAPC2	ANAPC2	ANAPC2.L;ANAPC2	ANAPC2	ANAPC2	ANAPHASE-PROMOTING COMPLEX SUBUNIT 2-LIKE;ANAPC2		ANC2_MOUSE;ANAPC2	ANAPHASE-PROMOTING COMPLEX SUBUNIT 2;ANAPC2	ANC2_MOUSE;ANAPC2	ANAPHASE-PROMOTING COMPLEX SUBUNIT 2, TRANSCRIPT VARIANT X2; ANAPHASE-PROMOTING COMPLEX SUBUNIT 2, TRANSCRIPT VARIANT X1;ANAPHASE-PROMOTING COMPLEX SUBUNIT 2-LIKE;ANAPHASE-PROMOTING COMPLEX SUBUNIT 2
5161	PORTHOMCL5161[AjBfCgCiDrGgLvMmOjOlPsSpXl|(14 genes, 13 taxa)]:	-0.591154	-0.564923	-0.58	-0.342892	-0.45402	-0.306294	-0.810571	-0.402106	0.268971	-0.848793	-0.587255	-0.506495	DDX51	DDX51	DDX51	DDX51.L;DDX51	DDX51	DDX51	ATP-DEPENDENT RNA HELICASE DDX51-LIKE;DDX51	DDX51	DDX51_DANRE;DDX51	PUTATIVE ATP-DEPENDENT RNA HELICASE DDX51;DDX51	DDX51_HUMAN;DDX51	ATP-DEPENDENT RNA HELICASE DDX51
5193	PORTHOMCL5193[AjBfCgCiDrGgLvMmOjOlPsSpXl|(14 genes, 13 taxa)]:	-0.462363	-0.633231	-0.546648	-0.345	-0.41326	-0.247088	-0.795506	-0.606014	0.181794	-0.675315	-0.779289	-0.506139	WDR43	WDR43	WDR43	WDR43.L;LOC398447;WDR43	WDR43	WDR43	WD REPEAT-CONTAINING PROTEIN 43	WDR43	WDR43_HUMAN;WDR43	PUTATIVE WD REPEAT-CONTAINING PROTEIN 43	WDR43_HUMAN;WDR43	WD REPEAT-CONTAINING PROTEIN 43;WDR43
4456	PORTHOMCL4456[AjBfCiDrGgMmOjOlPsSpXl|(15 genes, 11 taxa)]:	-0.672308	-0.841187	-0.512033	-0.0533333	-0.332794	-0.269706	-0.857182	-0.508811	0.492794	0	-0.798284	-0.505919	TAF5L	TAF5L	TAF5L	TAF5L.S;TAF5L.L;TAF5L	TAF5L	TAF5L	TAF5-LIKE RNA POLYMERASE II P300/CBP-ASSOCIATED FACTOR-ASSOCIATED FACTOR 65 KDA SUBUNIT 5L	TAF5L	TAF5L_MOUSE;TAF5L	PUTATIVE TAF5-LIKE RNA POLYMERASE II		TAF5-LIKE RNA POLYMERASE II P300/CBP-ASSOCIATED FACTOR-ASSOCIATED FACTOR 65 KDA SUBUNIT 5L;TRANSCRIPTION INITIATION FACTOR TFIID SUBUNIT 5;TAF5L;TAF5
4810	PORTHOMCL4810[AjBfCgCiDrGgLvMmOjOlPsSpXl|(15 genes, 13 taxa)]:	-0.581374	-0.579341	-0.548516	-0.851225	-0.584902	-0.324206	-0.415312	-0.15485	-0.852353	-0.522312	-0.648284	-0.504966	PSMD6	PSMD6	PSMD6	PSMD6.L;PSMD6	PSMD6	PSMD6	26S PROTEASOME NON-ATPASE REGULATORY SUBUNIT 6;PSMD6	PSMD6	PSMD6_HUMAN;GDAP1_HUMAN;PSMD6	PUTATIVE 26S PROTEASOME NON-ATPASE REGULATORY SUBUNIT 6;PSMD6	PSMD6_HUMAN;PSMD6	26S PROTEASOME NON-ATPASE REGULATORY SUBUNIT 6;PSMD6
3820	PORTHOMCL3820[AjBfCgCiDrGgMmOjOlPsSpXl|(16 genes, 12 taxa)]:	-0.624286	-0.461319	-0.665989	-0.278554	-0.49826	-0.440235	-0.724	-0.342587	-0.608118	0	-0.297426	-0.504404	PDZD11	PDZD11	PDZD11	PDZD11.L;PDZD11	PDZD11	PDZD11	PDZ DOMAIN-CONTAINING PROTEIN 11-LIKE;PDZD11		PDZ11_CHICK	PUTATIVE PDZ DOMAIN-CONTAINING PROTEIN 11		PDZ DOMAIN-CONTAINING PROTEIN 11
1197	PORTHOMCL1197[AjBfCgCiDrGgLvMmOjOlPsSpXl|(27 genes, 13 taxa)]:	-0.450659	-0.549363	-0.606648	-0.139216	-0.592255	-0.0566176	-0.865974	-0.763497	-0.405765	-0.662064	-0.458211	-0.503029	HBS1L	HBS1L	HBS1L	HBS1L.L;HBS1L	HBS1L	HBS1L	HBS1-LIKE PROTEIN;HBS1L	HBS1L	HBS1L_HUMAN	HYPOTHETICAL PROTEIN;PUTATIVE HBS1-LIKE PROTEIN	HBS1L_PONAB	EUKARYOTIC PEPTIDE CHAIN RELEASE FACTOR GTP-BINDING SUBUNIT ERF3A;HBS1-LIKE PROTEIN
7165	PORTHOMCL7165[AjBfCgCiDrGgMmOjOlPsSpXl|(12 genes, 12 taxa)]:	-0.508571	-0.738681	-0.596484	-0.0350245	-0.4125	-0.151735	-0.86761	-0.705697	-0.402794	0	-0.428309	-0.502038	PEX1	PEX1	PEX1	PEX1.L;PEX1	PEX1	PEX1	PEROXISOME BIOGENESIS PROTEIN 1-LIKE		PEX1_HUMAN	PUTATIVE PEROXISOME BIOGENESIS FACTOR 1		PEROXISOME BIOGENESIS FACTOR 1
6606	PORTHOMCL6606[AjBfCgCiDrGgLvMmOjOlPsSpXl|(13 genes, 13 taxa)]:	-0.368901	-0.605582	-0.357912	-0.604363	-0.120441	-0.818912	-0.723623	-0.403839	-0.243706	-0.142642	0.285907	-0.500447	COPS2	COPS2	COPS2	COPS2.S;COPS2	COPS2	COPS2	COP9 SIGNALOSOME COMPLEX SUBUNIT 2-LIKE;COPS2		CSN2_XENLA	PUTATIVE COP9 SIGNALOSOME COMPLEX SUBUNIT 2	CSN2_XENLA;COPS2	COP9 SIGNALOSOME COMPLEX SUBUNIT 2;COPS2
954	PORTHOMCL954[AjBfCgCiDrGgLvMmOjOlPsSpXl|(30 genes, 13 taxa)]:	-0.0451099	-0.614198	-0.966264	-0.225858	-0.0298529	-0.449471	-0.914169	-0.751113	-0.800765	-0.744768	-0.00171569	-0.499504	PBX3;PBX1;PBX4	PBX3;PBX4	PBX3;PBX1;PBX2;PBX4	PBX3.S;PBX1.S;LOC108698242;PBX3	PBX1A;PBX HOMEOBOX 3;PBX HOMEOBOX 1;PBX1	PBX1B;PBX1A;PBX3B;PBX2;PBX4;PBX3A;PBX1;PBX3	TRANSCRIPTION FACTOR PROTEIN;PBX2		PBX1_MOUSE	PUTATIVE PBX HOMEOBOX PROTEIN ISOFORM X1	PBX3_MOUSE;PBX2_XENLA	PRE-B-CELL LEUKEMIA TRANSCRIPTION FACTOR 3
6153	PORTHOMCL6153[AjBfCgCiDrGgLvMmOjOlPsSpXl|(13 genes, 13 taxa)]:	-0.441044	-0.722242	-0.55033	-0.575074	-0.105833	-0.183588	-0.87039	-0.546085	0.139853	-0.758762	-0.645343	-0.499323	ECD	ECD	ECD	ECD.S;ECD	ECD	ECD	HSIGNALLINGT1 PROTEIN	ECD	ECD_MOUSE;ECD	HYPOTHETICAL PROTEIN;ECD	ECD_HUMAN	PROTEIN SGT1
4422	PORTHOMCL4422[AjBfCgCiDrGgLvMmOjOlPsSpXl|(15 genes, 13 taxa)]:	-0.0940659	-0.707604	-0.612527	-0.601201	-0.38299	-0.408176	-0.59461	-0.592517	0.813147	0.161837	-0.368505	-0.499212	PSMD5	PSMD5	PSMD5	PSMD5.L;PSMD5	PSMD5	PSMD5	26S PROTEASOME NON-ATPASE REGULATORY SUBUNIT 5	PSMD5	PSMD5_MACFA	PUTATIVE 26S PROTEASOME NON-ATPASE REGULATORY SUBUNIT 5-LIKE	PSMD5_HUMAN;PSMD5_BOVIN	26S PROTEASOME NON-ATPASE REGULATORY SUBUNIT 5
4097	PORTHOMCL4097[AjBfCgCiDrGgLvMmOjOlPsSpXl|(16 genes, 13 taxa)]:	-0.104835	-0.823077	-0.383022	-0.295588	-0.501078	-0.619382	-0.78961	-0.46846	0.577529	0.221032	0.201103	-0.498132	PARS2	TARSL2;TARS2	PARS2	PARS2.L;PARS2	PARS2	PARS2	PROBABLE PROLINE--TRNA LIGASE, MITOCHONDRIAL;PARS2	PARS2	SYPM_RAT;PARS2	PUTATIVE PROLINE--TRNA LIGASE, MITOCHONDRIAL;PARS2	SYPM_RAT	PROBABLE PROLINE--TRNA LIGASE, MITOCHONDRIAL;PROBABLE PROLINE--TRNA LIGASE, MITOCHONDRIAL, TRANSCRIPT VARIANT X1;PARS2
3330	PORTHOMCL3330[AjBfCgCiDrGgLvMmOjOlPsSpXl|(17 genes, 13 taxa)]:	-0.0158242	-0.482286	-0.183132	-0.510417	-0.75076	-0.848059	-0.859532	-0.329161	-0.836824	-0.41614	-0.801961	-0.497396	UFL1	UFL1	UFL1	UFL1.L;UFL1	UFL1	UFL1	E3 UFM1-PROTEIN LIGASE 1;UFL1	UFL1	UFL1_MACFA;UFL1	PUTATIVE E3 UFM1-PROTEIN LIGASE 1;PUTATIVE E3 UFM1-PROTEIN LIGASE 1-LIKE;UFL1	UFL1_CHICK;UFL1	E3 UFM1-PROTEIN LIGASE 1;UFL1
1812	PORTHOMCL1812[AjBfCgCiDrGgLvMmOjOlPsSpXl|(22 genes, 13 taxa)]:	-0.363187	-0.778725	-0.758187	-0.464706	-0.509387	-0.456529	-0.59374	-0.0537063	-0.772059	0.183901	0.307108	-0.497271	MTG2	GTPBP5;MTG2	MTG2	LOC108718576;MTG2.L;MTG2	MTG2	MEP1B (1 OF MANY);MTG2;MEP1B	MITOCHONDRIAL RIBOSOME-ASSOCIATED GTPASE 2-LIKE;MTG2	MTG2	MTG2_PONAB;MTG2	HYPOTHETICAL PROTEIN;PUTATIVE ZINC METALLOPROTEINASE NAS-13-LIKE;PUTATIVE MITOCHONDRIAL RIBOSOME-ASSOCIATED GTPASE 2;MTG2	MTG2_PONAB;MTG2	ZINC METALLOPROTEINASE NAS-13, TRANSCRIPT VARIANT X1; ZINC METALLOPROTEINASE NAS-13, TRANSCRIPT VARIANT X2;MITOCHONDRIAL RIBOSOME-ASSOCIATED GTPASE 2;MTG2
1707	PORTHOMCL1707[AjBfCgCiDrGgLvMmOjOlPsSpXl|(23 genes, 13 taxa)]:	-0.14989	-0.649802	-0.654341	-0.0955637	-0.184118	-0.798205	-0.686325	-0.758805	-0.322294	-0.589205	-0.0914216	-0.497131	MTOR	MTOR	MTOR	MTOR.L;MTOR	MTOR (1 OF MANY);MTOR	MTOR	SERINE/THREONINE-PROTEIN KINASE MTOR-LIKE, TRANSCRIPT VARIANT X2; SERINE/THREONINE-PROTEIN KINASE MTOR-LIKE, TRANSCRIPT VARIANT X1;MTOR	MTOR	MTOR_MOUSE;MTOR;TOR	TARGET OF RAPAMYCIN	MTOR_MOUSE;MTOR_HUMAN;MTOR	SERINE/THREONINE-PROTEIN KINASE MTOR-LIKE;SERINE/THREONINE-PROTEIN KINASE MTOR;MTOR
3059	PORTHOMCL3059[AjBfCgCiDrGgLvMmOjOlPsSpXl|(18 genes, 13 taxa)]:	-0.225824	-0.186418	-0.477253	-0.0540196	-0.60848	-0.797676	-0.761403	-0.853487	-0.846912	-0.783364	-0.33223	-0.49557	RNF10	RNF10	RNF10	RNF10.S;LOC108716017;RNF10	RNF10	RNF10	RING FINGER PROTEIN 10, TRANSCRIPT VARIANT X1; RING FINGER PROTEIN 10, TRANSCRIPT VARIANT X2		RNF10_XENLA	PUTATIVE RING FINGER PROTEIN 10-LIKE;HYPOTHETICAL PROTEIN	RNF10_XENLA	RING FINGER PROTEIN 10
4117	PORTHOMCL4117[AjBfCgCiDrGgLvMmOjOlPsSpXl|(16 genes, 13 taxa)]:	-0.561209	-0.74211	-0.576154	-0.13652	-0.203137	-0.112206	-0.739351	-0.878454	-0.280029	-0.286667	-0.58799	-0.493642	CLNS1A	CLNS1A	CLNS1A	LOC108696418;CLNS1A	CLNS1A	CLNS1A	METHYLOSOME SUBUNIT PICLN-LIKE	CLNS1A	ICLN_RABIT	PUTATIVE METHYLOSOME SUBUNIT PICLN-LIKE ISOFORM X1;CLNS1A	ICLN_MOUSE	METHYLOSOME SUBUNIT PICLN-LIKE;METHYLOSOME SUBUNIT PICLN;CLNS1A
4397	PORTHOMCL4397[AjBfCgCiDrGgLvMmOjOlPsSpXl|(15 genes, 13 taxa)]:	-0.500275	-0.772484	-0.575659	-0.159706	-0.51	-0.387118	-0.604195	-0.439333	-0.243588	-0.700144	-0.680025	-0.493596	NUP133	NUP133	NUP133	NUP133.L;NUP133	NUP133	NUP133	NUCLEAR PORE COMPLEX PROTEIN NUP133-LIKE	NUP133	NU133_MOUSE	PUTATIVE NUCLEAR PORE COMPLEX PROTEIN	NU133_MOUSE	NUCLEAR PORE COMPLEX PROTEIN NUP133
888	PORTHOMCL888[AjBfCgCiDrGgLvMmOlPsSpXl|(31 genes, 12 taxa)]:	-0.168242	-0.446813	-0.897747	-0.189265	-0.372745	-0.735176	-0.738039	-0.3974	0	-0.7471	-0.0474265	-0.493178	LRIG2;LRIG3	LRIG2;LRIG3	LRIG3;LRIG2	LOC108711112;LRIG3.S;LRIG3	LRIG3	LRIG1;LRIG3	LEUCINE-RICH REPEATS AND IMMUNOGLOBULIN-LIKE DOMAINS PROTEIN 3;PROTEIN SLIT-LIKE			HYPOTHETICAL PROTEIN;SLIT AND NTRK-LIKE PROTEIN 5;PUTATIVE CARBOXYPEPTIDASE N SUBUNIT 2-LIKE;LRIG2	LRIG3_HUMAN;LRIG3	LEUCINE-RICH REPEATS AND IMMUNOGLOBULIN-LIKE DOMAINS PROTEIN 3, TRANSCRIPT VARIANT X1; LEUCINE-RICH REPEATS AND IMMUNOGLOBULIN-LIKE DOMAINS PROTEIN 3, TRANSCRIPT VARIANT X2
6175	PORTHOMCL6175[AjBfCgCiDrGgMmOjOlPsSpXl|(13 genes, 12 taxa)]:	-0.416868	-0.548571	-0.551264	-0.275441	-0.665784	-0.702118	-0.763156	-0.0203497	0.455618	0	-0.736029	-0.492944	EIF2B5	EIF2B5	EIF2B5	LOC108718035;EIF2B5	EIF2B5	EIF2B5	TRANSLATION INITIATION FACTOR EIF-2B SUBUNIT EPSILON-LIKE, TRANSCRIPT VARIANT X1; TRANSLATION INITIATION FACTOR EIF-2B SUBUNIT EPSILON-LIKE, TRANSCRIPT VARIANT X2;EIF2B5	EIF2B5	EI2BE_MOUSE;EIF2B5	PUTATIVE TRANSLATION INITIATION FACTOR EIF-2B SUBUNIT EPSILON;EIF2B5		TRANSLATION INITIATION FACTOR EIF-2B SUBUNIT EPSILON;EIF2B5
4414	PORTHOMCL4414[AjBfCgCiDrGgLvMmOjOlPsSpXl|(15 genes, 13 taxa)]:	-0.366484	-0.398637	-0.557088	-0.868309	-0.503211	-0.0932059	-0.863948	-0.292238	0.120676	-0.561961	-0.30527	-0.49289	YARS	YARS	YARS	YARS.L;YARS.S;YARS	YARS	YARS	TYROSINE--TRNA LIGASE, CYTOPLASMIC;YARS		SYYC_XENLA;YARS	PUTATIVE TYROSINE--TRNA LIGASE, CYTOPLASMIC;YARS	SYYC_XENTR;YARS	TYROSINE--TRNA LIGASE, CYTOPLASMIC;YARS
5287	PORTHOMCL5287[AjBfCgCiDrGgLvMmOjOlPsSpXl|(14 genes, 13 taxa)]:	-0.645604	-0.924484	-0.63467	-0.319926	-0.756789	-0.0488235	-0.538532	-0.0715594	-0.324206	-0.714303	-0.243015	-0.492549	MAPKAP1	MAPKAP1	MAPKAP1	MAPKAP1.L;MAPKAP1	MAPKAP1	MAPKAP1	TARGET OF RAPAMYCIN COMPLEX 2 SUBUNIT MAPKAP1-LIKE	MAPKAP1	SIN1_CHICK;MAPKAP1	PUTATIVE TARGET OF RAPAMYCIN COMPLEX 2 SUBUNIT MAPKAP1;MAPKAP1	SIN1_XENTR;SIN1_RAT;MAPKAP1	TARGET OF RAPAMYCIN COMPLEX 2 SUBUNIT MAPKAP1, TRANSCRIPT VARIANT X1; TARGET OF RAPAMYCIN COMPLEX 2 SUBUNIT MAPKAP1, TRANSCRIPT VARIANT X2;MAPKAP1
8913	PORTHOMCL8913[BfCgCiDrGgLvMmOlPsXl|(10 genes, 10 taxa)]:	-0.408022	-0.672176	-0.385824	-0.192955	-0.240735	-0.665828	-0.653818	-0.719295	0	0.703571	0	-0.492332	BCL10	BCL10	BCL10	BCL10.S	BCL10	BCL10	UNCHARACTERIZED LOC100181150, TRANSCRIPT VARIANT X2; UNCHARACTERIZED LOC100181150, TRANSCRIPT VARIANT X1				BCL10_MOUSE
3307	PORTHOMCL3307[AjBfCgCiDrGgLvMmOjOlPsSpXl|(17 genes, 13 taxa)]:	-0.734231	-0.779824	-0.803352	-0.216397	-0.252623	-0.223194	-0.628974	-0.283217	-0.349029	-0.684458	-0.797916	-0.490226	ATR	ATR	ATR	ATR.L;ATR	ATR	ATR	SERINE/THREONINE-PROTEIN KINASE ATR, TRANSCRIPT VARIANT X1; SERINE/THREONINE-PROTEIN KINASE ATR, TRANSCRIPT VARIANT X2;ATR	ATR	ATR_HUMAN	PUTATIVE SERINE/THREONINE-PROTEIN KINASE ATR;TRANSFORMATION/TRANSCRIPTION DOMAIN-ASSOCIATED PROTEIN	ATR_MOUSE	SERINE/THREONINE-PROTEIN KINASE ATR;ATR
4644	PORTHOMCL4644[AjBfCgCiDrGgLvMmOjOlPsSpXl|(15 genes, 13 taxa)]:	-0.434341	-0.463824	-0.520055	-0.120221	-0.288382	-0.571853	-0.893571	-0.629096	-0.487324	-0.236636	-0.353309	-0.490168	RRAGA	RRAGA	RRAGA;RRAGB	RRAGA.L;RRAGA.S;RRAGA	RRAGA	RRAGA	RAS-RELATED GTP-BINDING PROTEIN A-LIKE;RRAGA	RRAGA	RRAGA_RAT	PUTATIVE RAS-RELATED GTP-BINDING PROTEIN A-LIKE;RRAGA	RRAGA_RAT;RRAGA	RAS-RELATED GTP-BINDING PROTEIN A, TRANSCRIPT VARIANT X1; RAS-RELATED GTP-BINDING PROTEIN A, TRANSCRIPT VARIANT X2;RRAGA
4582	PORTHOMCL4582[AjBfCgCiDrGgMmOjOlPsSpXl|(15 genes, 12 taxa)]:	-0.380055	-0.521363	-0.538407	-0.916103	-0.36652	-0.900794	-0.280104	-0.0161538	-0.350853	0	-0.541912	-0.489937	PSMD3	PSMD3	PSMD3	PSMD3.L	PSMD3	PSMD3	26S PROTEASOME NON-ATPASE REGULATORY SUBUNIT 3, TRANSCRIPT VARIANT X1; 26S PROTEASOME NON-ATPASE REGULATORY SUBUNIT 3, TRANSCRIPT VARIANT X2;PSMD3	PSMD3	PSMD3_BOVIN;PSMD3	PUTATIVE 26S PROTEASOME NON-ATPASE REGULATORY SUBUNIT 3 ISOFORM X2;PSMD3		26S PROTEASOME NON-ATPASE REGULATORY SUBUNIT 3, TRANSCRIPT VARIANT X1; 26S PROTEASOME NON-ATPASE REGULATORY SUBUNIT 3, TRANSCRIPT VARIANT X3; 26S PROTEASOME NON-ATPASE REGULATORY SUBUNIT 3, TRANSCRIPT VARIANT X2;PSMD3
4028	PORTHOMCL4028[AjBfCgCiDrGgLvMmOjOlPsSpXl|(16 genes, 13 taxa)]:	-0.322692	-0.622022	-0.502747	-0.299583	-0.287598	-0.426971	-0.860091	-0.595594	-0.146176	-0.777647	-0.647333	-0.489662	RRP7A	RRP7A	RRP7A	RRP7A.S;RRP7A	RRP7A	RRP7A	RIBOSOMAL RNA-PROCESSING PROTEIN 7 HOMOLOG A-LIKE, TRANSCRIPT VARIANT X2; RIBOSOMAL RNA-PROCESSING PROTEIN 7 HOMOLOG A-LIKE, TRANSCRIPT VARIANT X1	RRP7A	RRP7A_MOUSE;RRP7A	PUTATIVE RIBOSOMAL RNA-PROCESSING PROTEIN 7-LIKE A	RRP7A_MOUSE;RRP7A	RIBOSOMAL RNA-PROCESSING PROTEIN 7 HOMOLOG A;RRP7A
2813	PORTHOMCL2813[AjBfCgCiDrGgLvMmOjOlPsSpXl|(18 genes, 13 taxa)]:	-0.47011	-0.789055	-0.551813	-0.214191	-0.459632	-0.225265	-0.765727	-0.440909	-0.7285	-0.512033	-0.684191	-0.489588	RIOK1	RIOK1	RIOK1	LOC108720060;RIOK1.L;RIOK1	RIOK1	RIOK1	SERINE/THREONINE-PROTEIN KINASE RIO1-LIKE;RIOK1	RIOK1	RIOK1_HUMAN;RIOK1	PUTATIVE SERINE/THREONINE-PROTEIN KINASE RIO1;RIOK1	RIOK1_HUMAN;RIOK1	SERINE/THREONINE-PROTEIN KINASE RIO1;RIOK1
5610	PORTHOMCL5610[AjBfCgCiDrGgLvMmOjOlPsSpXl|(14 genes, 13 taxa)]:	-0.521813	-0.628484	-0.534835	-0.213186	-0.231936	-0.118824	-0.758117	-0.906583	-0.750971	-0.835273	-0.705515	-0.489222	EBNA1BP2	EBNA1BP2	EBNA1BP2	EBNA1BP2-A;EBNA1BP2	EBNA1BP2	EBNA1BP2	PROBABLE RRNA-PROCESSING PROTEIN EBP2;LOC100183007	EBNA1BP2	EBP2_MOUSE	PUTATIVE RRNA-PROCESSING PROTEIN EBP2;EBNA1BP2	EBP2_MOUSE;EBNA1BP2	PROBABLE RRNA-PROCESSING PROTEIN EBP2;EBNA1BP2
5390	PORTHOMCL5390[AjBfCgCiDrGgLvMmOjOlPsSpXl|(14 genes, 13 taxa)]:	-0.198022	-0.863956	-0.665934	-0.440686	-0.718386	-0.286118	-0.438468	-0.301818	-0.164294	0.293333	-0.122059	-0.489174	GAS8	GAS8	GAS8	GAS8.S;GAS8	GROWTH ARREST-SPECIFIC PROTEIN 8	GAS8	GROWTH ARREST-SPECIFIC PROTEIN 8;GAS8	GAS8	GAS8_HUMAN	PUTATIVE GROWTH ARREST-SPECIFIC PROTEIN 8;GAS8	GAS8_HUMAN;GAS8	GROWTH ARREST-SPECIFIC PROTEIN 8;GAS8
4901	PORTHOMCL4901[AjBfCgCiDrGgLvMmOjOlPsSpXl|(15 genes, 13 taxa)]:	-0.0136813	-0.639912	-0.682033	-0.837696	-0.488088	-0.228441	-0.852182	-0.169161	0.586458	0.351084	-0.549755	-0.488899	IGHMBP2	IGHMBP2	IGHMBP2	IGHMBP2.L;IGHMBP2	IGHMBP2	IGHMBP2	ZINC FINGER PROTEIN 2;IGHMBP2	IGHMBP2	SMBP2_HUMAN;IGHMBP2	PUTATIVE DNA-BINDING PROTEIN SMUBP-2-LIKE;PUTATIVE DNA-BINDING PROTEIN SMUBP-2;IGHMBP2	SMBP2_HUMAN;IGHMBP2	DNA-BINDING PROTEIN SMUBP-2;IGHMBP2
3602	PORTHOMCL3602[AjBfCgCiDrGgLvMmOjOlPsSpXl|(17 genes, 13 taxa)]:	-0.573187	-0.823516	-0.556044	-0.261544	-0.590711	-0.336324	-0.384636	-0.378574	-0.909029	-0.546398	-0.749632	-0.488067	PWP1	PWP1	PWP1	PWP1.S;PWP1	PWP1	PWP1	PERIODIC TRYPTOPHAN PROTEIN 1 HOMOLOG		PWP1_MOUSE;PWP1	HYPOTHETICAL PROTEIN;PWP1	PWP1_BOVIN;PWP1_MOUSE;PWP1	PERIODIC TRYPTOPHAN PROTEIN 1 HOMOLOG, TRANSCRIPT VARIANT X2; PERIODIC TRYPTOPHAN PROTEIN 1 HOMOLOG, TRANSCRIPT VARIANT X1;PERIODIC TRYPTOPHAN PROTEIN 1 HOMOLOG;PWP1
4935	PORTHOMCL4935[AjBfCgCiDrGgLvMmOjOlPsSpXl|(15 genes, 13 taxa)]:	-0.385549	-0.797802	-0.548681	-0.381225	-0.12826	-0.425441	-0.835883	-0.399905	-0.684529	0.0306089	-0.766299	-0.487843	ORC3	ORC3	ORC3	ORC3.S;ORC3	ORC3	ORC3	ORIGIN RECOGNITION COMPLEX SUBUNIT 3-LIKE	ORC3	ORC3_BOVIN;ORC3	PUTATIVE ORIGIN RECOGNITION COMPLEX SUBUNIT 3;ORC3	ORC3_HUMAN	ORIGIN RECOGNITION COMPLEX SUBUNIT 3;ORC3
4861	PORTHOMCL4861[AjBfCgCiDrGgLvMmOjOlPsSpXl|(15 genes, 13 taxa)]:	-0.806264	-0.383648	-0.48044	-0.307083	-0.199167	-0.110382	-0.799026	-0.816321	-0.837029	-0.702394	-0.402819	-0.487791	NUDT1	NUDT1	NUDT1	NUDT1.S;NUDT1	NUDT1	NUDT1	7,8-DIHYDRO-8-OXOGUANINE TRIPHOSPHATASE-LIKE;NUDT1	NUDT1	8ODP_RAT;NUDT1	PUTATIVE 7,8-DIHYDRO-8-OXOGUANINE TRIPHOSPHATASE;NUDT1	8ODP_RAT;NUDT1	7,8-DIHYDRO-8-OXOGUANINE TRIPHOSPHATASE;NUDT1
6860	PORTHOMCL6860[AjBfCgCiDrGgMmOjOlPsSpXl|(13 genes, 12 taxa)]:	-0.371264	-0.681407	-0.596758	-0.185196	-0.362794	-0.160294	-0.829078	-0.702785	0.218971	0	-0.448039	-0.486197	SUGP1	SUGP1	SUGP1	LOC494697;SUGP1.S;SUGP1	SUGP1	SUGP1	SURP AND G-PATCH DOMAIN-CONTAINING PROTEIN 1-LIKE;SUGP1		SUGP1_HUMAN	PUTATIVE SURP AND G-PATCH DOMAIN-CONTAINING PROTEIN 1-LIKE		UNCHARACTERIZED LOC583039
5418	PORTHOMCL5418[AjBfCgCiDrGgLvMmOjOlPsSpXl|(14 genes, 13 taxa)]:	-0.66956	-0.508396	-0.0979121	-0.489926	-0.403627	-0.524559	-0.927039	-0.266993	0.186676	0.186295	-0.716422	-0.486002	TPRKB	TPRKB	TPRKB	TPRKB.S;TPRKB.L;TPRKB	TPRKB	TPRKB	EKC/KEOPS COMPLEX SUBUNIT TPRKB-LIKE		TPRKB_MOUSE	TP53RK-BINDING PROTEIN	TPRKB_HUMAN	EKC/KEOPS COMPLEX SUBUNIT TPRKB
5670	PORTHOMCL5670[AjBfCgCiDrGgLvMmOlPsSpXl|(14 genes, 12 taxa)]:	-0.450055	-0.859077	-0.444615	-0.142892	-0.580147	-0.387235	-0.857649	-0.164965	0	-0.853622	-0.526348	-0.48583	PTCD1	PTCD1	PTCD1	PTCD1.L;PTCD1	PTCD1	PTCD1	PENTATRICOPEPTIDE REPEAT-CONTAINING PROTEIN 1, MITOCHONDRIAL			PUTATIVE PENTATRICOPEPTIDE REPEAT-CONTAINING PROTEIN 1, MITOCHONDRIAL	PTCD1_PONAB	PENTATRICOPEPTIDE REPEAT-CONTAINING PROTEIN 1, MITOCHONDRIAL
3749	PORTHOMCL3749[AjBfCgCiDrGgLvMmOjOlPsSpXl|(16 genes, 13 taxa)]:	-0.483352	-0.874462	-0.828571	-0.43598	-0.156397	-0.205118	-0.775818	-0.125064	-0.837824	-0.813519	-0.43848	-0.485595	RFC3	RFC3	RFC3	RFC3.L;RFC3	RFC3	RFC3	REPLICATION FACTOR C SUBUNIT 3-LIKE;RFC3	RFC3	RFC3_HUMAN;RFC3	PUTATIVE REPLICATION FACTOR C SUBUNIT 3;RFC3	RFC3_HUMAN;RFC3	REPLICATION FACTOR C SUBUNIT 3;REPLICATION FACTOR C SUBUNIT 3-LIKE;RFC3
5288	PORTHOMCL5288[AjBfCgCiDrGgLvMmOjOlPsSpXl|(14 genes, 13 taxa)]:	-0.0652198	-0.55789	-0.0435165	-0.171789	-0.566495	-0.831765	-0.862286	-0.784587	-0.908059	-0.77259	-0.636887	-0.485444	SLC30A5	SLC30A5	SLC30A5	SLC30A5.L;LOC108707280;SLC30A5	SLC30A5	SLC30A5	ZINC TRANSPORTER 5-LIKE;SLC30A5	SLC30A5	ZNT5_MOUSE;SLC30A5	PUTATIVE ZINC TRANSPORTER 5;SLC30A5	ZNT5_DANRE;SLC30A5	ZINC TRANSPORTER 5;SLC30A5
2147	PORTHOMCL2147[AjBfCgCiDrGgLvMmOjOlPsSpXl|(21 genes, 13 taxa)]:	-0.18544	-0.730374	-0.853407	-0.171127	-0.244167	-0.752388	-0.274026	-0.644081	-0.316235	-0.760454	-0.26875	-0.481876	ARID1B;ARID1A	ARID1A	ARID1B;ARID1A	LOC108716708;LOC108707477;ARID1A	ARID1AB;ARID1AA;ARID1A	ARID1B	AT-RICH INTERACTIVE DOMAIN-CONTAINING PROTEIN 1A-LIKE, TRANSCRIPT VARIANT X1; AT-RICH INTERACTIVE DOMAIN-CONTAINING PROTEIN 1A-LIKE, TRANSCRIPT VARIANT X2		ARI1B_HUMAN	PUTATIVE AT-RICH INTERACTIVE DOMAIN-CONTAINING PROTEIN 1A ISOFORM X5	ARI1B_HUMAN	AT-RICH INTERACTIVE DOMAIN-CONTAINING PROTEIN 1A, TRANSCRIPT VARIANT X4; AT-RICH INTERACTIVE DOMAIN-CONTAINING PROTEIN 1A, TRANSCRIPT VARIANT X3; AT-RICH INTERACTIVE DOMAIN-CONTAINING PROTEIN 1A, TRANSCRIPT VARIANT X2; AT-RICH INTERACTIVE DOMAIN-CONTAINING PROTEIN 1A, TRANSCRIPT VARIANT X5; AT-RICH INTERACTIVE DOMAIN-CONTAINING PROTEIN 1A, TRANSCRIPT VARIANT X1
5603	PORTHOMCL5603[AjBfCgCiDrGgLvMmOjOlPsSpXl|(14 genes, 13 taxa)]:	-0.670385	-0.551033	-0.588352	-0.164902	-0.245784	-0.663029	-0.312169	-0.658128	-0.746441	0.145201	-0.0573529	-0.481723	NUBPL	NUBPL	NUBPL	NUBPL.L;NUBPL	NUBPL	NUBPL	IRON-SULFUR PROTEIN NUBPL-LIKE, TRANSCRIPT VARIANT X1; IRON-SULFUR PROTEIN NUBPL-LIKE, TRANSCRIPT VARIANT X2;NUBPL	NUBPL	NUBPL_HUMAN;NUBPL	PUTATIVE IRON-SULFUR PROTEIN NUBPL;NUBPL	NUBPL_MOUSE;NUBPL	IRON-SULFUR PROTEIN NUBPL;NUBPL
3854	PORTHOMCL3854[AjBfCgCiDrGgLvMmOjOlPsSpXl|(16 genes, 13 taxa)]:	-0.43489	-0.712484	-0.577912	-0.273897	-0.22299	-0.370353	-0.692052	-0.560839	-0.889912	-0.244706	-0.46299	-0.480677	UMPS	UMPS	UMPS	UMPS.L;UMPS	UMPS	UMPS	URIDINE 5'-MONOPHOSPHATE SYNTHASE-LIKE, TRANSCRIPT VARIANT X3; URIDINE 5'-MONOPHOSPHATE SYNTHASE-LIKE, TRANSCRIPT VARIANT X2; URIDINE 5'-MONOPHOSPHATE SYNTHASE-LIKE, TRANSCRIPT VARIANT X1;UMPS	UMPS	UMPS_BOVIN;UMPS_HUMAN	PUTATIVE URIDINE 5'-MONOPHOSPHATE SYNTHASE-LIKE;UMPS	UMPS_PONAB;UMPS_HUMAN	URIDINE 5'-MONOPHOSPHATE SYNTHASE;UMPS
1036	PORTHOMCL1036[AjBfCgCiDrGgLvMmOjOlPsSpXl|(29 genes, 13 taxa)]:	-0.178571	-0.0735385	-0.75022	-0.359216	-0.604632	-0.594176	-0.417571	-0.861888	-0.687706	-0.824665	-0.223529	-0.479977	FNDC3A;FNDC3B	FNDC3B;FNDC3A	FNDC3A;FNDC3C1;FND3C2	FNDC3A.L;FNDC3B.L;FNDC3A.2.S;FNDC3A.2.L;FNDC3A;FNDC3B	FNDC3A;FNDC3BA;FNDC3B	FNDC3BA;FNDC3BB;FNDC3A;FNDC3B	FIBRONECTIN TYPE-III DOMAIN-CONTAINING PROTEIN 3A-LIKE;FIBRONECTIN TYPE-III DOMAIN-CONTAINING PROTEIN 3A-LIKE, TRANSCRIPT VARIANT X2; FIBRONECTIN TYPE-III DOMAIN-CONTAINING PROTEIN 3A-LIKE, TRANSCRIPT VARIANT X3; FIBRONECTIN TYPE-III DOMAIN-CONTAINING PROTEIN 3A-LIKE, TRANSCRIPT VARIANT X1	FNDC3A	FND3A_MOUSE	HYPOTHETICAL PROTEIN;PUTATIVE TWITCHIN-LIKE	FND3A_MOUSE	FIBRONECTIN TYPE-III DOMAIN-CONTAINING PROTEIN 3A;FNDC3A
3812	PORTHOMCL3812[AjBfCgCiDrGgLvMmOlPsSpXl|(16 genes, 12 taxa)]:	-0.608846	-0.578242	-0.236593	-0.165294	-0.439436	-0.881794	-0.729935	-0.192727	0	-0.541775	-0.748529	-0.479109	MRPS31	MRPS31	MRPS31	MRPS31.S;MRPS31.L;MRPS31	MRPS31	MRPS31	28S RIBOSOMAL PROTEIN S31, MITOCHONDRIAL-LIKE			PUTATIVE 28S RIBOSOMAL PROTEIN S31, MITOCHONDRIAL-LIKE;MRPS31	RT31_BOVIN;MRPS31	28S RIBOSOMAL PROTEIN S31, MITOCHONDRIAL
1862	PORTHOMCL1862[AjBfCgCiDrGgLvMmOjOlPsSpXl|(22 genes, 13 taxa)]:	-0.431209	-0.59644	-0.57967	-0.264951	-0.475809	-0.0487059	-0.531506	-0.902171	-0.6055	-0.824314	-0.190074	-0.478808	CNOT1	CNOT1	CNOT1	CNOT1.L;CNOT1.S;CNOT1	CNOT1	CNOT1	CCR4-NOT TRANSCRIPTION COMPLEX SUBUNIT 1		CNOT1_MOUSE;CNOT1	PUTATIVE CCR4-NOT TRANSCRIPTION COMPLEX;PUTATIVE CCR4-NOT TRANSCRIPTION COMPLEX SUBUNIT 1 ISOFORM X9	CNOT1_DANRE;CNOT1_XENTR	CCR4-NOT TRANSCRIPTION COMPLEX SUBUNIT 1;CCR4-NOT TRANSCRIPTION COMPLEX SUBUNIT 1-LIKE, TRANSCRIPT VARIANT X2; CCR4-NOT TRANSCRIPTION COMPLEX SUBUNIT 1-LIKE, TRANSCRIPT VARIANT X1;CCR4-NOT TRANSCRIPTION COMPLEX SUBUNIT 1-LIKE
586	PORTHOMCL586[AjBfCgCiDrGgLvMmOjOlPsSpXl|(39 genes, 13 taxa)]:	-0.560549	-0.316703	-0.576099	-0.532377	-0.699167	-0.211029	-0.898195	-0.0324084	0.142618	-0.748524	0.56027	-0.478316	RECQL	RECQL	RECQL	RECQL.L;RECQL	RECQL	RECQL	ATP-DEPENDENT DNA HELICASE Q1, TRANSCRIPT VARIANT X1; ATP-DEPENDENT DNA HELICASE Q1, TRANSCRIPT VARIANT X2;ATP-DEPENDENT DNA HELICASE Q1-LIKE, TRANSCRIPT VARIANT X2; ATP-DEPENDENT DNA HELICASE Q1-LIKE, TRANSCRIPT VARIANT X1;RECQL		RECQ1_HUMAN;RECQL	PUTATIVE BLOOM SYNDROME PROTEIN-LIKE;HYPOTHETICAL PROTEIN;RECQL	RECQ_ECOLI;RECQ1_HUMAN	ATP-DEPENDENT DNA HELICASE Q1, TRANSCRIPT VARIANT X2; ATP-DEPENDENT DNA HELICASE Q1, TRANSCRIPT VARIANT X1;RECQL
2407	PORTHOMCL2407[AjBfCgCiDrGgLvMmOjOlPsSpXl|(20 genes, 13 taxa)]:	-0.264505	-0.843429	-0.387802	-0.161276	-0.85318	-0.808558	-0.354675	-0.152168	0.390176	-0.582779	-0.00661765	-0.478199	PLEKHH1;PLEKHH2	PLEKHH1;PLEKHH2	PLEKHH1	PLEKHH2.S;PLEKHH2	PLEKHH1	PLEKHH1	PLECKSTRIN HOMOLOGY DOMAIN-CONTAINING FAMILY H MEMBER 2		PKHH2_HUMAN	PUTATIVE PLECKSTRIN-LIKEY DOMAIN-CONTAINING FAMILY H MEMBER 1;PUTATIVE PLECKSTRIN-LIKEY DOMAIN-CONTAINING FAMILY H MEMBER 1 ISOFORM X2	PKHH1_MOUSE	PLECKSTRIN HOMOLOGY DOMAIN-CONTAINING FAMILY H MEMBER 1
932	PORTHOMCL932[AjBfCgCiDrGgLvMmOjOlPsSpXl|(30 genes, 13 taxa)]:	-0.421264	-0.688747	-0.348352	-0.691789	-0.0720588	-0.834088	-0.312649	-0.451958	0.466794	-0.673622	-0.492647	-0.477613	TXN	SMC2	TXN1;TXNDC8;TXNDC2;TXN	TXN.L;UNKNOWN.S;LOC100037235;LOC108706331	THIOREDOXIN	TXN;ZGC:56493	THIOREDOXIN-2, TRANSCRIPT VARIANT X1; THIOREDOXIN-2, TRANSCRIPT VARIANT X2;THIOREDOXIN-LIKE;THIOREDOXIN-2-LIKE;TRXA	TXN	THIO_GEOCY	PUTATIVE THIOREDOXIN-LIKE;HYPOTHETICAL PROTEIN	THIO_CHLPN;THIO_ICTPU	THIOREDOXIN;TRXA
4366	PORTHOMCL4366[AjBfCgCiDrGgLvMmOjOlPsSpXl|(15 genes, 13 taxa)]:	-0.448132	-0.564132	-0.546429	-0.513088	-0.0700735	-0.381676	-0.821169	-0.448277	-0.216971	-0.84838	-0.741422	-0.474122	TBL3	TBL3	TBL3	TBL3.L;TBL3	TBL3	TBL3	TRANSDUCIN BETA-LIKE PROTEIN 3;TBL3	TBL3	TBL3_BOVIN;TBL3	PUTATIVE TRANSDUCIN BETA-LIKE PROTEIN 3;TBL3	TBL3_RAT	TRANSDUCIN BETA-LIKE PROTEIN 3
5701	PORTHOMCL5701[AjBfCgCiDrGgLvMmOjOlPsSpXl|(14 genes, 13 taxa)]:	-0.213846	-0.482022	-0.58511	-0.696936	-0.107083	-0.486324	-0.753416	-0.45257	0.183647	0.485181	-0.678309	-0.472163	NPLOC4	NPLOC4	NPLOC4	NPLOC4.S	NPLOC4	NPLOC4	NUCLEAR PROTEIN LOCALIZATION PROTEIN 4 HOMOLOG;NPLOC4	NPLOC4	NPL4_RAT	PUTATIVE NUCLEAR PROTEIN LOCALIZATION PROTEIN 4-LIKE;NPLOC4	NPL4_HUMAN;NPLOC4	NUCLEAR PROTEIN LOCALIZATION PROTEIN 4 HOMOLOG;NPLOC4
2268	PORTHOMCL2268[AjBfCgCiDrGgLvMmOjOlPsSpXl|(20 genes, 13 taxa)]:	-0.513242	-0.769626	-0.503297	-0.707083	-0.322181	-0.141853	-0.707805	-0.109021	-0.604824	-0.641135	-0.288426	-0.471764	RAD50	RAD50	RAD50	RAD50.L;RAD50	RAD50	RAD50	DNA REPAIR PROTEIN RAD50	RAD50	RAD50_MOUSE	PUTATIVE DNA REPAIR PROTEIN	RAD50_HUMAN	DNA REPAIR PROTEIN RAD50;DNA REPAIR PROTEIN RAD50-LIKE;RAD50
7725	PORTHOMCL7725[BfCiDrGgMmOjOlPsXl|(12 genes, 9 taxa)]:	-0.543297	-0.514198	-0.254121	-0.292328	-0.259779	-0.253529	-0.889857	-0.752657	-0.895147	0	0	-0.469971	CLINT1	CLINT1	CLINT1	CLINT1.S;CLINT1.L;CLINT1	CLINT1A;CLINT1 (1 OF MANY);CLINT1	CLINT1A;CLINT1 (1 OF MANY)	CLATHRIN INTERACTOR 1-LIKE		EPN4_BOVIN;CLINT1
2923	PORTHOMCL2923[AjBfCgCiDrGgLvMmOjOlPsXl|(18 genes, 12 taxa)]:	-0.268242	-0.636264	-0.551374	-0.783113	-0.707402	-0.1725	-0.521649	-0.113566	0.197529	-0.0594634	0	-0.469264	PDIA4	PDIA4	PDIA4	PDIA4.L;PDIA4	PDIA4	PDIA4	PROTEIN DISULFIDE-ISOMERASE A4-LIKE, TRANSCRIPT VARIANT X2; PROTEIN DISULFIDE-ISOMERASE A4-LIKE, TRANSCRIPT VARIANT X1;PDIA4	PDIA4	PDIA4_HUMAN	HYPOTHETICAL PROTEIN	PDIA4_BOVIN;PDIA4_HUMAN;PDIA4
5965	PORTHOMCL5965[AjBfCiDrGgLvMmOjOlPsSpXl|(14 genes, 12 taxa)]:	-0.63478	-0.935077	-0.608626	-0.391324	-0.0867647	-0.0774412	-0.402416	-0.597776	-0.667765	-0.398452	-0.20576	-0.466776	TACC3	TACC3	TACC3	TACC3.L;TACC3.S;TACC3		TACC3	TRANSFORMING ACIDIC COILED-COIL-CONTAINING PROTEIN 3		TACC3_XENLA	PUTATIVE TRANSFORMING ACIDIC COILED-COIL-CONTAINING PROTEIN 3 ISOFORM X4	TACC3_XENLA	TRANSFORMING ACIDIC COILED-COIL-CONTAINING PROTEIN 3, TRANSCRIPT VARIANT X1; TRANSFORMING ACIDIC COILED-COIL-CONTAINING PROTEIN 3, TRANSCRIPT VARIANT X4; TRANSFORMING ACIDIC COILED-COIL-CONTAINING PROTEIN 3, TRANSCRIPT VARIANT X2; TRANSFORMING ACIDIC COILED-COIL-CONTAINING PROTEIN 3, TRANSCRIPT VARIANT X3
3022	PORTHOMCL3022[AjBfCgCiDrGgLvMmOjOlPsSpXl|(18 genes, 13 taxa)]:	-0.229231	-0.587253	-0.449011	-0.401642	-0.493309	-0.547971	-0.770571	-0.249301	-0.743059	-0.286295	-0.283211	-0.466036	PSMD11	PSMD11	PSMD11	PSMD11.S;PSMD11.L;PSMD11	PSMD11B;26S PROTEASOME NON-ATPASE REGULATORY SUBUNIT 11A	PSMD11A;PSMD11B;PSMD11	26S PROTEASOME NON-ATPASE REGULATORY SUBUNIT 11;PSMD11	PSMD11	PSD11_MOUSE	PUTATIVE 26S PROTEASOME NON-ATPASE REGULATORY SUBUNIT 11-LIKE	PSD11_XENTR;PSMD11	26S PROTEASOME NON-ATPASE REGULATORY SUBUNIT 11-LIKE;PSMD11
1165	PORTHOMCL1165[AjBfCgCiDrGgLvMmOjOlPsSpXl|(27 genes, 13 taxa)]:	-0.460714	-0.503429	-0.38478	-0.500784	-0.460931	-0.392853	-0.244039	-0.771189	0.293324	0.601135	-0.152083	-0.46484	CALR;CALR3	CALR;CALR3	CALR;CALR3;CALR4	CALR;CALR.L;CALR3.L	CALRETICULIN;CALR3B;CALR	CALR3A;CALR;CALR3B	CALRETICULIN;CALR		CALR_HUMAN;CALR	PUTATIVE CALRETICULIN-LIKE ISOFORM X2;HYPOTHETICAL PROTEIN	CALR_RABIT	CALRETICULIN
8371	PORTHOMCL8371[BfCiDrGgLvMmOjOlPsSpXl|(11 genes, 11 taxa)]:	-0.49544	-0.488879	-0.413352	-0.0775	-0.710809	-0.851185	-0.525195	-0.132867	0.0899706	-0.451785	-0.117034	-0.461903	MRPL51	MRPL51	MRPL51	MRPL51.L;MRPL51	MRPL51	MRPL51	39S RIBOSOMAL PROTEIN L51, MITOCHONDRIAL-LIKE		RM51_XENLA;MRPL51		RM51_DROPS;MRPL51	39S RIBOSOMAL PROTEIN L51, MITOCHONDRIAL-LIKE;MRPL51
6383	PORTHOMCL6383[AjBfCgCiDrGgLvMmOjOlPsSpXl|(13 genes, 13 taxa)]:	-0.350659	-0.792088	-0.522198	-0.274069	-0.49875	-0.437382	-0.811416	-0.00453374	-0.419941	-0.121383	-0.617279	-0.461387	MED17	MED17	MED17	MED17.L;MED17	MED17	CABZ01056631.1;MED17	MEDIATOR OF RNA POLYMERASE II TRANSCRIPTION SUBUNIT 17-LIKE;MED17	MED17	MED17_MOUSE;MED17	PUTATIVE MEDIATOR OF RNA POLYMERASE II TRANSCRIPTION SUBUNIT 17 ISOFORM X2;MED17	MED17_MOUSE;MED17	MEDIATOR OF RNA POLYMERASE II TRANSCRIPTION SUBUNIT 17, TRANSCRIPT VARIANT X2; MEDIATOR OF RNA POLYMERASE II TRANSCRIPTION SUBUNIT 17, TRANSCRIPT VARIANT X1;MED17
7720	PORTHOMCL7720[BfCiDrGgMmOjOlPsSpXl|(12 genes, 10 taxa)]:	-0.363626	-0.697495	-0.0897253	-0.311887	-0.417059	-0.398	-0.725442	-0.68641	-0.676108	0	0.180463	-0.461206	TMEM267	C5ORF28;TMEM267	GM21967;TMEM267	C5ORF28.L;C5ORF28.S;TMEM267	TMEM267	TMEM267	TRANSMEMBRANE PROTEIN C5ORF28-LIKE		CE028_MOUSE			TRANSMEMBRANE PROTEIN C5ORF28
3858	PORTHOMCL3858[AjBfCgCiDrGgLvMmOjOlPsSpXl|(16 genes, 13 taxa)]:	-0.391923	-0.565099	-0.533681	-0.440147	-0.475343	-0.291353	-0.784338	-0.206643	-0.4065	-0.697503	-0.730882	-0.461066	POLR1A	POLR1A	POLR1A	POLR1A.L;POLR1A	POLR1A	POLR1A	DNA-DIRECTED RNA POLYMERASE I SUBUNIT RPA1-LIKE;POLR1A	POLR1A	RPA1_MOUSE	PUTATIVE DNA-DIRECTED RNA POLYMERASE I SUBUNIT RPA1	RPB1_HUMAN;POLR2A	DNA-DIRECTED RNA POLYMERASE I SUBUNIT RPA1;POLR1A
8483	PORTHOMCL8483[AjBfCgCiDrGgMmOlPsXl|(10 genes, 10 taxa)]:	-0.446264	-0.524703	-0.491593	-0.164167	-0.600662	-0.52	-0.871117	-0.0622242	0	0	0	-0.460091	ATAD3A	ATAD3A	ATAD3A	ATAD3A.S;ATAD3A	ATAD3A	ATAD3B	ATPASE FAMILY AAA DOMAIN-CONTAINING PROTEIN 3-LIKE;ATAD3A	ATAD3A		HYPOTHETICAL PROTEIN;ATAD3A
6462	PORTHOMCL6462[AjBfCiDrGgLvMmOjOlPsSpXl|(13 genes, 12 taxa)]:	-0.492473	-0.359429	-0.383626	-0.867279	-0.0769608	-0.616088	-0.71213	-0.161189	-0.0134412	0.170857	-0.666054	-0.458647	DAP3	DAP3	DAP3	DAP3.L;DAP3	DAP3	DAP3	28S RIBOSOMAL PROTEIN S29, MITOCHONDRIAL-LIKE	DAP3	RT29_MOUSE;DAP3	PUTATIVE 28S RIBOSOMAL PROTEIN S29, MITOCHONDRIAL;DAP3	RT29_BOVIN	28S RIBOSOMAL PROTEIN S29, MITOCHONDRIAL;DAP3
4473	PORTHOMCL4473[AjBfCgCiDrGgLvMmOjOlPsSpXl|(15 genes, 13 taxa)]:	-0.533736	-0.649714	-0.51978	-0.448333	-0.00651961	-0.421206	-0.641143	-0.44442	0.132382	-0.509432	-0.345466	-0.458107	RSL24D1	RSL24D1	RSL24D1;GM20509	MGC81028	RSL24D1	RSL24D1	PROBABLE RIBOSOME BIOGENESIS PROTEIN RLP24, TRANSCRIPT VARIANT X2; PROBABLE RIBOSOME BIOGENESIS PROTEIN RLP24, TRANSCRIPT VARIANT X1	RSL24D1	RLP24_MOUSE;RSL24D1	PUTATIVE RIBOSOME BIOGENESIS PROTEIN RLP24;RSL24D1	RLP24_MOUSE;RSL24D1	PROBABLE RIBOSOME BIOGENESIS PROTEIN RLP24
2545	PORTHOMCL2545[AjBfCgCiDrGgLvMmOjOlPsSpXl|(19 genes, 13 taxa)]:	-0.185714	-0.663385	-0.39478	-0.423949	-0.326422	-0.676824	-0.801455	-0.184965	-0.802059	-0.715088	-0.328554	-0.457187	TRAPPC8	TRAPPC8	TRAPPC8	TRAPPC8.S	TRAPPC8	TRAPPC8	TRAFFICKING PROTEIN PARTICLE COMPLEX SUBUNIT 8-LIKE	TRAPPC8	TPPC8_HUMAN;TRAPPC8	PUTATIVE TRAFFICKING PROTEIN PARTICLE COMPLEX SUBUNIT 8	TPPC8_HUMAN	TRAFFICKING PROTEIN PARTICLE COMPLEX SUBUNIT 8
6536	PORTHOMCL6536[AjBfCgCiDrGgLvMmOjOlPsSpXl|(13 genes, 13 taxa)]:	-0.338077	-0.438989	-0.0740659	-0.933181	-0.88473	-0.126382	-0.798506	-0.0436713	0.385176	-0.73517	0.0988971	-0.4547	ASPH	ASPH	ASPH	ASPH.S	UNM_HU7910;ASPH	ASPH	ASPARTYL/ASPARAGINYL BETA-HYDROXYLASE-LIKE;ASPH	ASPH	ASPH_BOVIN;ASPH	ASPARTYL/ASPARAGINYL BETA-HYDROXYLASE;ASPH	ASPH_BOVIN	BROMODOMAIN-CONTAINING PROTEIN 4
4724	PORTHOMCL4724[AjBfCgCiDrGgLvMmOjOlPsSpXl|(15 genes, 13 taxa)]:	-0.319231	-0.533934	-0.561648	-0.0829902	-0.531078	-0.694412	-0.157377	-0.744685	0.0136176	-0.58291	-0.650735	-0.453169	UGGT1	UGGT1	UGGT1	UGGT1-LIKE.L;UGGT1	UGGT1	UGGT1	UDP-GLUCOSE:GLYCOPROTEIN GLUCOSYLTRANSFERASE 1, TRANSCRIPT VARIANT X2; UDP-GLUCOSE:GLYCOPROTEIN GLUCOSYLTRANSFERASE 1, TRANSCRIPT VARIANT X3; UDP-GLUCOSE:GLYCOPROTEIN GLUCOSYLTRANSFERASE 1, TRANSCRIPT VARIANT X1;UGGT1	UGGT1	UGGG1_MOUSE;UGGT1	PUTATIVE UDP-GLUCOSE:GLYCOPROTEIN GLUCOSYLTRANSFERASE 1;PUTATIVE UDP-GLUCOSE:GLYCOPROTEIN GLUCOSYLTRANSFERASE 1-LIKE	UGGG1_MOUSE	UDP-GLUCOSE:GLYCOPROTEIN GLUCOSYLTRANSFERASE 1
5620	PORTHOMCL5620[AjBfCgCiDrGgLvMmOjOlPsSpXl|(14 genes, 13 taxa)]:	-0.445989	-0.661055	-0.0486264	-0.626103	-0.607941	-0.706029	-0.17174	-0.317972	0.465324	-0.362576	-0.0245098	-0.448182	MRPL27	MRPL27	MRPL27	LOC108701099;MRPL27	MRPL27	MRPL27	39S RIBOSOMAL PROTEIN L27, MITOCHONDRIAL-LIKE;MRPL27	MRPL27	RM27_MOUSE	PUTATIVE 39S RIBOSOMAL PROTEIN L27, MITOCHONDRIAL		39S RIBOSOMAL PROTEIN L27, MITOCHONDRIAL;MRPL27
606	PORTHOMCL606[BfCgCiDrGgLvMmOjOlPsSpXl|(38 genes, 12 taxa)]:	-0.664835	-0.650769	-0.512143	-0.423505	-0.138676	-0.108176	-0.843169	-0.23972	0.518765	-0.0930857	0.232475	-0.447624	YWHAZ;YWHAB;YWHAQ	YWHAZ;YWHAB;YWHAQ	YWHAZ;YWHAB	YWHAB.S;YWHAZ.L;YWHAB.L;YWHAZ.S;YWHAB;YWHAZ	14-3-3 PROTEIN BETA/ALPHA-1;14-3-3 PROTEIN ZETA;14-3-3 PROTEIN BETA/ALPHA-B;YWHAQB;YWHAZ;YWHAQ	YWHABB;YWHABL;YWHAZ;YWHAQA;YWHABA	14-3-3-LIKE PROTEIN 2;YWHAQ	YWHAQ;SFN;YWHAB	1433B_PONAB;143BB_DANRE;YWHAB		14332_CAEEL	14-3-3-LIKE PROTEIN 2;14-3-3-LIKE PROTEIN;YWHAQ;YWHAB
2971	PORTHOMCL2971[AjBfCgCiDrGgLvMmOjOlPsSpXl|(18 genes, 13 taxa)]:	-0.252582	-0.577626	-0.719396	-0.766544	-0.0755147	-0.563118	-0.219338	-0.403029	0.128353	0.329453	-0.371078	-0.447143	NPEPPS	NPEPPS	NPEPPS	NPEPPS.L	NPEPPS	NPEPPS	PUROMYCIN-SENSITIVE AMINOPEPTIDASE-LIKE, TRANSCRIPT VARIANT X2; PUROMYCIN-SENSITIVE AMINOPEPTIDASE-LIKE, TRANSCRIPT VARIANT X1;NPEPPS		PSA_MOUSE;NPEPPS	PUTATIVE PUROMYCIN-SENSITIVE AMINOPEPTIDASE;NPEPPS	AMPN_BOVIN;PSA_MOUSE;ANPEP	PUROMYCIN-SENSITIVE AMINOPEPTIDASE;GLUTAMYL AMINOPEPTIDASE-LIKE;PUROMYCIN-SENSITIVE AMINOPEPTIDASE-LIKE;NPEPPS
2854	PORTHOMCL2854[AjBfCgCiDrGgLvMmOjOlPsSpXl|(18 genes, 13 taxa)]:	-0.196374	-0.076967	-0.0908791	-0.679632	-0.0267157	-0.957529	-0.893701	-0.617528	-0.825971	-0.867843	-0.555392	-0.442416	SEC22B	SEC22B	SEC22B	SEC22B.L;SEC22B	SEC22BB;VESICLE-TRAFFICKING PROTEIN SEC22B;SEC22B	SEC22BB;SEC22BA;SEC22B	VESICLE-TRAFFICKING PROTEIN SEC22B;SEC22B	SEC22B	SC22B_CHICK;SEC22B	PUTATIVE VESICLE-TRAFFICKING PROTEIN SEC22B;SEC22B	SC22B_RAT;SEC22B	VESICLE-TRAFFICKING PROTEIN SEC22B;SEC22B
6317	PORTHOMCL6317[AjBfCgCiDrGgLvMmOjOlPsSpXl|(13 genes, 13 taxa)]:	-0.316209	-0.937538	-0.174066	-0.0429657	-0.629265	-0.508147	-0.746532	-0.173427	0.438559	0.0761816	-0.247672	-0.441019	WDR34	WDR34	WDR34	WDR34.L;WDR34	WDR34	WDR34	WD REPEAT-CONTAINING PROTEIN 34, TRANSCRIPT VARIANT X1;LOC100185043	WDR34	WDR34_MOUSE;WDR34	PUTATIVE WD REPEAT-CONTAINING PROTEIN 34-LIKE;WDR34	WDR34_MOUSE;WDR34	WD REPEAT-CONTAINING PROTEIN 34, TRANSCRIPT VARIANT X2; WD REPEAT-CONTAINING PROTEIN 34, TRANSCRIPT VARIANT X1; WD REPEAT-CONTAINING PROTEIN 34, TRANSCRIPT VARIANT X3; WD REPEAT-CONTAINING PROTEIN 34, TRANSCRIPT VARIANT X4;WDR34
6568	PORTHOMCL6568[AjBfCgCiDrGgLvMmOjOlPsSpXl|(13 genes, 13 taxa)]:	-0.130989	-0.832527	-0.836099	-0.155797	-0.109118	-0.444118	-0.71839	-0.300234	-0.442588	0.203385	0.285539	-0.440909		KIAA0825	2210408I21RIK	KIAA0825.L	KIAA0825 ORTHOLOG	SI:CH73-280O22.2	UNCHARACTERIZED PROTEIN KIAA0825-LIKE		K0825_HUMAN	HYPOTHETICAL PROTEIN	K0825_HUMAN	UNCHARACTERIZED PROTEIN KIAA0825
5217	PORTHOMCL5217[AjBfCiDrGgLvMmOjOlPsSpXl|(14 genes, 12 taxa)]:	-0.178516	-0.620879	-0.396209	-0.300613	-0.340931	-0.408941	-0.621338	-0.650861	-0.508029	-0.459254	-0.516667	-0.439786	POLR3H	POLR3H	POLR3H	POLR3H.L;POLR3H	POLR3H	POLR3H	DNA-DIRECTED RNA POLYMERASE III SUBUNIT RPC8-LIKE;POLR3H	POLR3H	RPC8_HUMAN;POLR3H	PUTATIVE DNA-DIRECTED RNA POLYMERASE III SUBUNIT RPC8;POLR3H	RPC8_HUMAN;POLR3H	DNA-DIRECTED RNA POLYMERASE III SUBUNIT RPC8;DNA-DIRECTED RNA POLYMERASE III SUBUNIT RPC8-LIKE, TRANSCRIPT VARIANT X1; DNA-DIRECTED RNA POLYMERASE III SUBUNIT RPC8-LIKE, TRANSCRIPT VARIANT X2;POLR3H
1745	PORTHOMCL1745[AjBfCgCiDrGgLvMmOjOlPsSpXl|(23 genes, 13 taxa)]:	-0.037033	-0.205363	-0.564066	-0.430833	-0.666593	-0.743235	-0.166325	-0.702727	-0.504941	0.370898	-0.129534	-0.439522	PARVB;PARVA	PARVB	PARVA;PARVB	PARVB.S;PARVA.L;PARVB	PARVAA;PARVB;PARVA	PARVB;PARVAB;PARVAA;PARVA	BETA-PARVIN, TRANSCRIPT VARIANT X2; BETA-PARVIN, TRANSCRIPT VARIANT X1;PARVB	PARVB	PARVB_HUMAN;PARVB	PUTATIVE BETA-PARVIN-LIKE ISOFORM X3;PARVA	PARVB_HUMAN;PARVA	BETA-PARVIN-LIKE, TRANSCRIPT VARIANT X3; BETA-PARVIN-LIKE, TRANSCRIPT VARIANT X1; BETA-PARVIN-LIKE, TRANSCRIPT VARIANT X2; BETA-PARVIN-LIKE, TRANSCRIPT VARIANT X4;BETA-PARVIN-LIKE, TRANSCRIPT VARIANT X2; BETA-PARVIN-LIKE, TRANSCRIPT VARIANT X4; BETA-PARVIN-LIKE, TRANSCRIPT VARIANT X1; BETA-PARVIN-LIKE, TRANSCRIPT VARIANT X3;BETA-PARVIN
4766	PORTHOMCL4766[AjBfCgCiDrGgLvMmOjOlPsSpXl|(15 genes, 13 taxa)]:	-0.115275	-0.498593	-0.513132	-0.233333	-0.838554	-0.0966471	-0.926766	-0.287533	0.560941	-0.559587	-0.345711	-0.438729		TAF6L	TAF6L	TAF6L.S;TAF6L	TAF6L	TAF6L	TAF6-LIKE RNA POLYMERASE II P300/CBP-ASSOCIATED FACTOR-ASSOCIATED FACTOR 65 KDA SUBUNIT 6L	TAF6L	TAF6L_HUMAN	PUTATIVE TAF6-LIKE RNA POLYMERASE II;TAF6L	TAF6L_MOUSE	TAF6-LIKE RNA POLYMERASE II P300/CBP-ASSOCIATED FACTOR-ASSOCIATED FACTOR 65 KDA SUBUNIT 6L;TAF6L
6600	PORTHOMCL6600[AjBfCiDrGgLvMmOjOlPsSpXl|(13 genes, 12 taxa)]:	-0.678407	-0.60422	-0.571813	-0.368064	-0.0407353	-0.110265	-0.470506	-0.655464	-0.707176	0.0658617	-0.191667	-0.437434	LSM4	LSM4	LSM4	LSM4.S	LSM4	LSM4	U6 SNRNA-ASSOCIATED SM-LIKE PROTEIN LSM4, TRANSCRIPT VARIANT X2; U6 SNRNA-ASSOCIATED SM-LIKE PROTEIN LSM4, TRANSCRIPT VARIANT X1;LSM4	LSM4	LSM4_HUMAN	PUTATIVE U6 SNRNA-ASSOCIATED SM-LIKE PROTEIN LSM4;LSM4	LSM4_MOUSE	U6 SNRNA-ASSOCIATED SM-LIKE PROTEIN LSM4;LSM4
3495	PORTHOMCL3495[AjBfCgCiDrGgLvMmOjOlPsSpXl|(17 genes, 13 taxa)]:	-0.272143	-0.210857	-0.685659	-0.460196	-0.216225	-0.799089	-0.177652	-0.672974	-0.602235	-0.563343	-0.680147	-0.436849	ADAL	ADAL	ADAL	ADAL.L;MGC80849;ADAL	ADAL	ADAL	ADENOSINE DEAMINASE-LIKE PROTEIN;ADAL	ADAL	ADAL_DANRE;ADAL	PUTATIVE ADENOSINE DEAMINASE-LIKE PROTEIN;PUTATIVE ADENOSINE DEAMINASE-LIKE PROTEIN-LIKE;ADAL	ADAL_DANRE;ADAL	ADENOSINE DEAMINASE-LIKE PROTEIN;ADAL
1334	PORTHOMCL1334[AjBfCgCiDrGgLvMmOjOlPsSpXl|(26 genes, 13 taxa)]:	-0.352363	-0.860967	-0.614011	-0.233235	-0.00541667	-0.0217353	-0.750506	-0.656501	-0.851735	-0.764954	-0.609338	-0.436842	RECQL5	RECQL5	RECQL5	RECQL5.L;BLM.L;RECQL5;BLM	RECQL5	RECQL5	ATP-DEPENDENT DNA HELICASE Q5-LIKE	RECQL5	RECQ5_HUMAN	PUTATIVE ATP-DEPENDENT DNA HELICASE Q5	RECQ5_HUMAN	ATP-DEPENDENT DNA HELICASE Q5;ATP-DEPENDENT DNA HELICASE Q5-LIKE, TRANSCRIPT VARIANT X1; ATP-DEPENDENT DNA HELICASE Q5-LIKE, TRANSCRIPT VARIANT X2
3308	PORTHOMCL3308[AjBfCgCiDrGgLvMmOjOlPsSpXl|(17 genes, 13 taxa)]:	-0.471593	-0.58844	-0.642033	-0.690686	-0.481863	-0.329912	-0.206506	-0.0718182	-0.771941	-0.841362	-0.124341	-0.435356	KIAA0368	KIAA0368	AI314180;KIAA0368	KIAA0368.L	ECPAS;FBXO10	SI:DKEY-245P14.7;FBXO10	PROTEASOME-ASSOCIATED PROTEIN ECM29 HOMOLOG	KIAA0368;NEU3.1	ECM29_MOUSE	PUTATIVE PROTEASOME-ASSOCIATED PROTEIN ECM29-LIKE	ECM29_MOUSE;ECM29_HUMAN	PROTEASOME-ASSOCIATED PROTEIN ECM29 HOMOLOG
2839	PORTHOMCL2839[AjBfCgCiDrGgLvMmOjOlPsSpXl|(18 genes, 13 taxa)]:	-0.0915934	-0.206374	-0.565604	-0.521176	-0.301446	-0.385265	-0.784208	-0.612406	0.814029	0.483013	-0.152328	-0.433509		CDC37	CDC37	CDC37.S;CDC37.L;CDC37	CDC37;HSP90 CO-CHAPERONE CDC37-LIKE	CABZ01093425.1	HSP90 CO-CHAPERONE CDC37;CDC37	CDC37	CDC37_HUMAN;CDC37	PUTATIVE HSP90 CO-CHAPERONE CDC37-LIKE;CDC37	CDC37_HUMAN;CDC37	HSP90 CO-CHAPERONE CDC37;HSP90 CO-CHAPERONE CDC37, TRANSCRIPT VARIANT X3; HSP90 CO-CHAPERONE CDC37, TRANSCRIPT VARIANT X2; HSP90 CO-CHAPERONE CDC37, TRANSCRIPT VARIANT X1;CDC37
925	PORTHOMCL925[AjBfCgCiDrGgLvMmOjOlPsSpXl|(30 genes, 13 taxa)]:	-0.412363	-0.712659	-0.758516	-0.344338	-0.431176	-0.176	-0.0281039	-0.595773	-0.722029	-0.318762	-0.0871858	-0.432366	SMG1	SMG1	SMG1	LOC108703118;SMG1	SMG1	SMG1	SERINE/THREONINE-PROTEIN KINASE SMG1;SERINE/THREONINE-PROTEIN KINASE SMG1-LIKE	SMG1		PUTATIVE SERINE/THREONINE-PROTEIN KINASE SMG1;PUTATIVE SERINE/THREONINE-PROTEIN KINASE SMG1-LIKE;NONC	SMG1_HUMAN;SMG1_MOUSE	SERINE/THREONINE-PROTEIN KINASE SMG1;SERINE/THREONINE-PROTEIN KINASE SMG1-LIKE
2002	PORTHOMCL2002[AjBfCgCiDrGgLvMmOjOlPsSpXl|(21 genes, 13 taxa)]:	-0.430714	-0.583209	-0.229341	-0.107157	-0.299559	-0.892147	-0.860195	-0.0435377	0.186147	0.32227	0.471078	-0.430732	CYP20A1	CYP20A1	CYP20A1	CYP20A1.L;CYP20A1	CYP20A1	CYP20A1	CYTOCHROME P450 20A1	CYP20A1	CP20A_HUMAN	HYPOTHETICAL PROTEIN	CP20A_BOVIN	CYTOCHROME P450 20A1
2533	PORTHOMCL2533[AjBfCgCiDrGgMmOjOlPsXl|(19 genes, 11 taxa)]:	-0.10044	-0.524176	-0.604505	-0.129853	-0.551569	-0.386471	-0.614896	-0.533846	-0.803706	0	0	-0.430719	RNF220	RNF220	RNF220	RNF220.1.L;LOC108715569;RNF220	RNF220B;RNF220;RNF220A	RNF220A;RNF220B;RNF220	E3 UBIQUITIN-PROTEIN LIGASE RNF220-LIKE, TRANSCRIPT VARIANT X3; E3 UBIQUITIN-PROTEIN LIGASE RNF220-LIKE, TRANSCRIPT VARIANT X1; E3 UBIQUITIN-PROTEIN LIGASE RNF220-LIKE, TRANSCRIPT VARIANT X2;LOC101242523	RNF220	RN220_HUMAN	HYPOTHETICAL PROTEIN;RNF220
4603	PORTHOMCL4603[AjBfCgCiDrGgLvMmOjOlPsSpXl|(15 genes, 13 taxa)]:	-0.425989	-0.566769	-0.545989	-0.308431	-0.082451	-0.407235	-0.544156	-0.56324	-0.511647	-0.56194	-0.728431	-0.430533	PMPCA	PMPCA	PMPCA	PMPCA.L;PMPCA.S;PMPCA	PMPCA	PMPCA	MITOCHONDRIAL-PROCESSING PEPTIDASE SUBUNIT ALPHA-LIKE;PMPCA	PMPCA	MPPA_HUMAN;PMPCA	PUTATIVE MITOCHONDRIAL-PROCESSING PEPTIDASE SUBUNIT ALPHA ISOFORM X1;PMPCA	MPPA_HUMAN;MPPA_MOUSE;PMPCA	MITOCHONDRIAL-PROCESSING PEPTIDASE SUBUNIT ALPHA, TRANSCRIPT VARIANT X2; MITOCHONDRIAL-PROCESSING PEPTIDASE SUBUNIT ALPHA, TRANSCRIPT VARIANT X1;PMPCA
4999	PORTHOMCL4999[BfCgCiDrGgLvMmOlPsSpXl|(15 genes, 11 taxa)]:	-0.124121	-0.797319	-0.403846	-0.136495	-0.449338	-0.0647353	-0.740701	-0.721589	0	0.389721	0.611427	-0.429768	RDH10	RDH10	RDH10	RDH10.S;RDH10.L;RDH10	RETINOL DEHYDROGENASE 10-A;RDH10A;RDH10	RDH20;RDH10B;RDH10A;RDH10	ESTRADIOL 17-BETA-DEHYDROGENASE 11				RD10B_DANRE	RETINOL DEHYDROGENASE 10-B, TRANSCRIPT VARIANT X3; RETINOL DEHYDROGENASE 10-B, TRANSCRIPT VARIANT X2; RETINOL DEHYDROGENASE 10-B, TRANSCRIPT VARIANT X4; RETINOL DEHYDROGENASE 10-B, TRANSCRIPT VARIANT X1
4912	PORTHOMCL4912[AjBfCgCiDrGgLvMmOjOlPsSpXl|(15 genes, 13 taxa)]:	-0.111099	-0.373758	-0.0362637	-0.80652	-0.344338	-0.0731765	-0.880403	-0.803007	0.574529	-0.22582	0.421936	-0.428571	CERK	CERK	CERK	CERK.L	CERK	CERK;CERK (1 OF MANY)	CERAMIDE KINASE-LIKE		CERK1_HUMAN;CERK	PUTATIVE CERAMIDE KINASE	CERK1_HUMAN;CERK	CERAMIDE KINASE;CERK
3856	PORTHOMCL3856[AjBfCgCiDrGgLvMmOjOlPsSpXl|(16 genes, 13 taxa)]:	-0.458901	-0.582901	-0.552802	-0.202623	-0.219412	-0.0680882	-0.835169	-0.504893	-0.364382	-0.534943	-0.771814	-0.428099	NOC4L	NOC4L	NOC4L	NOC4L.L;NOC4L.S;NOC4L	NOC4L	NOC4L	NUCLEOLAR COMPLEX PROTEIN 4 HOMOLOG B-LIKE	NOC4L	NOC4B_XENLA	PUTATIVE NUCLEOLAR COMPLEX PROTEIN 4-LIKE;NOC4L	NOC4B_XENLA;NOC4L	NUCLEOLAR COMPLEX PROTEIN 4 HOMOLOG;NOC4L
6579	PORTHOMCL6579[AjBfCgCiDrGgLvMmOjOlPsSpXl|(13 genes, 13 taxa)]:	-0.27467	-0.0543837	-0.904011	-0.248309	-0.439534	-0.100676	-0.850325	-0.500717	-0.109059	-0.0318679	-0.215809	-0.421578		SRRM3	SRRM2	SRRM2.L;EPB41	SERINE/ARGININE REPETITIVE MATRIX PROTEIN 2	SRRM2	SERINE/ARGININE REPETITIVE MATRIX PROTEIN 2-LIKE		MMP14_PONAB	PUTATIVE SERINE/ARGININE REPETITIVE MATRIX PROTEIN 2 ISOFORM X3;SRRM2	SRRM2_HUMAN;LOC106172769	SERINE/ARGININE REPETITIVE MATRIX PROTEIN 2, TRANSCRIPT VARIANT X2; SERINE/ARGININE REPETITIVE MATRIX PROTEIN 2, TRANSCRIPT VARIANT X5; SERINE/ARGININE REPETITIVE MATRIX PROTEIN 2, TRANSCRIPT VARIANT X3; SERINE/ARGININE REPETITIVE MATRIX PROTEIN 2, TRANSCRIPT VARIANT X1; SERINE/ARGININE REPETITIVE MATRIX PROTEIN 2, TRANSCRIPT VARIANT X4;SRRM2
2549	PORTHOMCL2549[AjBfCgCiDrGgLvMmOjOlPsSpXl|(19 genes, 13 taxa)]:	-0.0936264	-0.716088	-0.773571	-0.250588	-0.445662	-0.0955882	-0.776195	-0.20604	-0.794647	-0.886151	-0.27451	-0.41967	NF1	NF1	NF1	LOC108709669	NF1	NF1B;NF1A	NEUROFIBROMIN-LIKE;NEUROFIBROMIN	NF1	NF1_RAT	PUTATIVE NEUROFIBROMIN;PUTATIVE NEUROFIBROMIN-LIKE	NF1_RAT;NF1_HUMAN	NEUROFIBROMIN-LIKE;NEUROFIBROMIN
1391	PORTHOMCL1391[AjBfCgCiDrGgLvMmOjOlPsSpXl|(25 genes, 13 taxa)]:	-0.458571	-0.536132	-0.376648	-0.441005	-0.32451	-0.107647	-0.629247	-0.47965	0.901412	-0.303137	-0.598529	-0.419176	EXOG;ENDOG	EXOG;ENDOG	EXOG;ENDOG	ENDOG.L;EXOG.L;ENDOG	ENDOG	ENDOG;FQ311879.2;SI:CH211-274J7.1;FO818714.1	ENDONUCLEASE G, MITOCHONDRIAL-LIKE;ENDOG	ENDOG	EXOG_XENLA;EXOG	PUTATIVE NUCLEASE EXOG, MITOCHONDRIAL;HYPOTHETICAL PROTEIN;EXOG	EXOG_DANRE;EXOG	NUCLEASE EXOG, MITOCHONDRIAL;EXOG
4113	PORTHOMCL4113[AjBfCgCiDrGgLvMmOjOlPsSpXl|(16 genes, 13 taxa)]:	-0.452912	-0.532703	-0.487637	-0.341397	-0.100931	-0.331382	-0.801208	-0.302797	-0.658882	-0.793829	-0.718382	-0.418871	GET4	GET4	GET4	GET4.S;GET4	GET4	GET4	GOLGI TO ER TRAFFIC PROTEIN 4 HOMOLOG	GET4	GET4_ORYLA;GET4	GOLGI TO ER TRAFFIC PROTEIN 4-LIKE;PUTATIVE GOLGI TO ER TRAFFIC PROTEIN 4-LIKE B;GET4	GET4_HUMAN;GET4	GOLGI TO ER TRAFFIC PROTEIN 4 HOMOLOG B, TRANSCRIPT VARIANT X3; GOLGI TO ER TRAFFIC PROTEIN 4 HOMOLOG B, TRANSCRIPT VARIANT X2; GOLGI TO ER TRAFFIC PROTEIN 4 HOMOLOG B, TRANSCRIPT VARIANT X1;GET4
3890	PORTHOMCL3890[AjBfCgCiDrGgLvMmOjOlPsSpXl|(16 genes, 13 taxa)]:	-0.189615	-0.513846	-0.124121	-0.536324	-0.197181	-0.00705882	-0.891948	-0.876506	-0.847559	-0.743467	-0.636887	-0.417075	ARMC6	ARMC6	ARMC6	ARMC6.L;ARMC6	ARMC6	ARMC6	ARMADILLO REPEAT-CONTAINING PROTEIN 6, TRANSCRIPT VARIANT X1; ARMADILLO REPEAT-CONTAINING PROTEIN 6, TRANSCRIPT VARIANT X2;ARMC6	ARMC6	ARMC6_MOUSE;ARMC6	PUTATIVE ARMADILLO REPEAT-CONTAINING PROTEIN 6-LIKE;HYPOTHETICAL PROTEIN;ARMC6	ARMC6_MOUSE;ARMC6	ARMADILLO REPEAT-CONTAINING PROTEIN 6, TRANSCRIPT VARIANT X2; ARMADILLO REPEAT-CONTAINING PROTEIN 6, TRANSCRIPT VARIANT X1; ARMADILLO REPEAT-CONTAINING PROTEIN 6, TRANSCRIPT VARIANT X3; ARMADILLO REPEAT-CONTAINING PROTEIN 6, TRANSCRIPT VARIANT X4;ARMC6
1804	PORTHOMCL1804[AjBfCgCiDrGgLvMmOjOlPsSpXl|(22 genes, 13 taxa)]:	-0.00642857	-0.892879	-0.828077	-0.0223284	-0.248431	-0.391706	-0.139221	-0.799231	-0.786206	0.112281	-0.239828	-0.416038	GPR161	GPR161	GPR161	LOC108697932;LOC108697265;HTR7;GPR161	SI:CH211-237C6.4;GPR161	GPR161;GPR161 (1 OF MANY)	G-PROTEIN COUPLED RECEPTOR 161;UNCHARACTERIZED LOC100176943, TRANSCRIPT VARIANT X1; UNCHARACTERIZED LOC100176943, TRANSCRIPT VARIANT X2;LOC100182017	GPR161	GP161_HUMAN	PUTATIVE G-PROTEIN COUPLED RECEPTOR	GP161_MOUSE;OPSD1_MIZYE	G-PROTEIN COUPLED RECEPTOR 161;ALPHA-1A ADRENERGIC RECEPTOR-LIKE
8328	PORTHOMCL8328[BfCgCiDrGgLvMmOlPsSpXl|(11 genes, 11 taxa)]:	-0.328407	-0.327868	-0.816758	-0.115809	-0.13027	-0.511912	-0.911896	-0.184189	0	-0.0826625	0.0643382	-0.415889	APTX	APTX	APTX	APTX.L;APTX	APTX	APTX	FHA-HIT;APTX	APTX			APTX_MOUSE	APRATAXIN, TRANSCRIPT VARIANT X1; APRATAXIN, TRANSCRIPT VARIANT X2;APTX
5176	PORTHOMCL5176[AjBfCgCiDrGgLvMmOjOlPsSpXl|(14 genes, 13 taxa)]:	-0.475934	-0.30611	-0.40544	-0.243039	-0.42678	-0.157294	-0.872883	-0.439333	-0.853971	0.193457	-0.599877	-0.415852	COX11	COX11	COX11	COX11.L;COX11	COX11	COX11	CYTOCHROME C OXIDASE ASSEMBLY PROTEIN COX11, MITOCHONDRIAL-LIKE;COX11	COX11	DRG2_MOUSE;COX11	PUTATIVE CYTOCHROME C OXIDASE ASSEMBLY PROTEIN COX11, MITOCHONDRIAL;COX11	COX11_MOUSE;COX11	CYTOCHROME C OXIDASE ASSEMBLY PROTEIN COX11, MITOCHONDRIAL;CYTOCHROME C OXIDASE ASSEMBLY PROTEIN COX11, MITOCHONDRIAL-LIKE;COX11
5576	PORTHOMCL5576[AjBfCgCiDrGgLvMmOjOlPsSpXl|(14 genes, 13 taxa)]:	-0.521374	-0.393275	-0.898846	-0.103848	-0.0421814	-0.0430588	-0.864558	-0.439333	-0.458647	-0.660908	-0.678064	-0.413309	DGCR14;ESS2	DGCR14;ESS2	DGCR14;ESS2	DGCR14.L;DGCR14.S;ESS2	ESS2	DGCR14;ESS2	PROTEIN DGCR14, TRANSCRIPT VARIANT X2; PROTEIN DGCR14, TRANSCRIPT VARIANT X3; PROTEIN DGCR14, TRANSCRIPT VARIANT X1;ESS2	ESS2	DGC14_MOUSE;ESS2	HYPOTHETICAL PROTEIN;ESS2	DGC14_HUMAN;ESS2	PROTEIN DGCR14, TRANSCRIPT VARIANT X2; PROTEIN DGCR14, TRANSCRIPT VARIANT X3; PROTEIN DGCR14, TRANSCRIPT VARIANT X1;ESS2
4846	PORTHOMCL4846[AjBfCgCiDrGgLvMmOjOlPsSpXl|(15 genes, 13 taxa)]:	-0.324286	-0.648396	-0.517088	-0.782525	-0.370466	-0.0296765	-0.174831	-0.458182	-0.0198235	0.695666	-0.0824755	-0.413181	HSP90B1	HSP90B1	HSP90B1	HSP90B1.L;MGC68448;HSP90B1	HSP90B1	HSP90B1	ENDOPLASMIN-LIKE;HSP90B1	HSP90AA1	ENPL_RAT	HEAT SHOCK PROTEIN GP96;HSP90B1	ENPL_RAT;HSP90B1	HEAT SHOCK PROTEIN GP96;HSP90B1
5294	PORTHOMCL5294[AjBfCgCiDrGgLvMmOlPsSpXl|(14 genes, 12 taxa)]:	-0.377363	-0.843077	-0.618791	-0.226176	-0.162181	-0.241147	-0.802286	-0.0325874	0	-0.787595	-0.690441	-0.412951	SPDL1	SPDL1	SPDL1	SPDL1.L;SPDL1.S	SPDL1	SPDL1	PROTEIN SPINDLY-LIKE			HYPOTHETICAL PROTEIN	SPDLA_XENLA	PROTEIN SPINDLY-A, TRANSCRIPT VARIANT X2; PROTEIN SPINDLY-A, TRANSCRIPT VARIANT X1;PROTEIN SPINDLY-B
2254	PORTHOMCL2254[AjBfCgCiDrGgLvMmOjOlPsSpXl|(20 genes, 13 taxa)]:	-0.446429	-0.678286	-0.547637	-0.36625	-0.317328	-0.0849412	-0.196364	-0.651811	-0.372971	-0.692755	-0.54473	-0.411131	HEATR1	HEATR1	HEATR1	HEATR1.S;HEATR1	HEATR1	HEATR1	HEAT REPEAT-CONTAINING PROTEIN 1, TRANSCRIPT VARIANT X1; HEAT REPEAT-CONTAINING PROTEIN 1, TRANSCRIPT VARIANT X2;HEAT REPEAT-CONTAINING PROTEIN 1;LOC100175808	HEATR1	HEAT1_DANRE	PUTATIVE HEAT REPEAT-CONTAINING PROTEIN 1	HEAT1_DANRE	HEAT REPEAT-CONTAINING PROTEIN 1;UNCHARACTERIZED LOC577264
6697	PORTHOMCL6697[AjBfCgCiDrGgLvMmOjOlPsSpXl|(13 genes, 13 taxa)]:	-0.652418	-0.325714	-0.614505	-0.24277	-0.559118	-0.275853	-0.111	-0.504965	0.339853	-0.435253	-0.2	-0.410793	EIF5	EIF5	EIF5	EIF5.L;EIF5	EIF5	EIF5	EUKARYOTIC TRANSLATION INITIATION FACTOR 5, TRANSCRIPT VARIANT X1; EUKARYOTIC TRANSLATION INITIATION FACTOR 5, TRANSCRIPT VARIANT X2; EUKARYOTIC TRANSLATION INITIATION FACTOR 5, TRANSCRIPT VARIANT X3; EUKARYOTIC TRANSLATION INITIATION FACTOR 5, TRANSCRIPT VARIANT X4;EIF5	EIF5	IF5_MOUSE;EIF5	PUTATIVE EUKARYOTIC TRANSLATION INITIATION FACTOR 5	IF5_DROME;EIF5	EUKARYOTIC TRANSLATION INITIATION FACTOR 5;EIF5
2775	PORTHOMCL2775[AjBfCgCiDrGgLvMmOjOlPsSpXl|(18 genes, 13 taxa)]:	-0.518022	-0.600527	-0.560055	-0.194902	-0.363676	-0.0262059	-0.677506	-0.334196	-0.811235	-0.49257	-0.843873	-0.409386	EXOSC2	EXOSC2	EXOSC2	EXOSC2.L;EXOSC2	EXOSC2	EXOSC2	EXOSOME COMPLEX COMPONENT RRP4;EXOSC2	EXOSC2	EXOS2_BOVIN;EXOSC2	PUTATIVE EXOSOME COMPLEX COMPONENT RRP4;PUTATIVE EXOSOME COMPLEX COMPONENT RRP4-LIKE;EXOSC2	EXOS2_BOVIN;EXOSC2	EXOSOME COMPLEX COMPONENT RRP4;EXOSC2
3759	PORTHOMCL3759[AjBfCgCiDrGgLvMmOjOlPsSpXl|(16 genes, 13 taxa)]:	-0.52522	-0.451253	-0.396319	-0.400123	-0.205025	-0.465735	-0.746506	-0.0762482	-0.607941	0.0453664	-0.332353	-0.408304	EXOC7	EXOC7	EXOC7	EXOC7.L;EXOC7	EXOC7	EXOC7	EXOCYST COMPLEX COMPONENT 7, TRANSCRIPT VARIANT X1; EXOCYST COMPLEX COMPONENT 7, TRANSCRIPT VARIANT X2; EXOCYST COMPLEX COMPONENT 7, TRANSCRIPT VARIANT X3;EXOC7	EXOC7	EXOC7_RAT;EXOC7	HYPOTHETICAL PROTEIN;PUTATIVE EXOCYST COMPLEX COMPONENT 7;EXOC7	EXOC7_RAT	EXOCYST COMPLEX COMPONENT 7;EXOC7
6197	PORTHOMCL6197[AjBfCgCiDrGgLvMmOjOlPsXl|(13 genes, 12 taxa)]:	-0.410055	-0.541495	-0.184066	-0.697279	-0.038848	-0.273824	-0.66587	-0.44442	-0.794765	-0.941404	0	-0.406982	NCLN	NCLN	NCLN	MGC79091;NCLN	NCLN	NCL1;ZGC:109965	NICALIN-1-LIKE;NCLN	NCLN	NCLN_DANRE;NCLN	HYPOTHETICAL PROTEIN;NCLN	NCLN_DANRE;NCLN
5794	PORTHOMCL5794[AjBfCgCiDrGgLvMmOjOlPsSpXl|(14 genes, 13 taxa)]:	-0.355714	-0.727956	-0.460495	-0.415466	-0.191373	-0.288618	-0.619675	-0.195455	-0.839088	-0.277688	-0.647794	-0.406844	SSU72	SSU72	SSU72	SSU72.L;SSU72	SSU72	SSU72	RNA POLYMERASE II SUBUNIT A C-TERMINAL DOMAIN PHOSPHATASE SSU72, TRANSCRIPT VARIANT X2; RNA POLYMERASE II SUBUNIT A C-TERMINAL DOMAIN PHOSPHATASE SSU72, TRANSCRIPT VARIANT X1;SSU72	SSU72	SSU72_CHICK;SSU72_DANRE	PUTATIVE RNA POLYMERASE II SUBUNIT A C-TERMINAL DOMAIN PHOSPHATASE SSU72	SSU72_XENLA;SSU72	RNA POLYMERASE II SUBUNIT A C-TERMINAL DOMAIN PHOSPHATASE SSU72;SSU72
5016	PORTHOMCL5016[AjBfCgCiDrGgLvMmOjOlPsSpXl|(15 genes, 13 taxa)]:	-0.381209	-0.123956	-0.528681	-0.133603	-0.581667	-0.460971	-0.859883	-0.167762	-0.564059	-0.762477	-0.346201	-0.404716	POLR1E	POLR1E	POLR1E	POLR1E.L;POLR1E	POLR1E	POLR1E	DNA-DIRECTED RNA POLYMERASE I SUBUNIT RPA49-LIKE		RPA49_XENLA	PUTATIVE DNA-DIRECTED RNA POLYMERASE I SUBUNIT RPA49-LIKE;HYPOTHETICAL PROTEIN	RPA49_MOUSE	DNA-DIRECTED RNA POLYMERASE I SUBUNIT RPA49, TRANSCRIPT VARIANT X3; DNA-DIRECTED RNA POLYMERASE I SUBUNIT RPA49, TRANSCRIPT VARIANT X2; DNA-DIRECTED RNA POLYMERASE I SUBUNIT RPA49, TRANSCRIPT VARIANT X4; DNA-DIRECTED RNA POLYMERASE I SUBUNIT RPA49, TRANSCRIPT VARIANT X1
2572	PORTHOMCL2572[AjBfCgCiDrGgLvMmOjOlPsSpXl|(19 genes, 13 taxa)]:	-0.634615	-0.719297	-0.474615	-0.223922	-0.0156618	-0.0153529	-0.801234	-0.345262	-0.628735	0.209247	0.11201	-0.403745	MPP5	MPP5	MPP5	PTPN3.S;MPP5.L;PTPN3;MPP5	MPP5 (1 OF MANY);MPP5B	MPP5A;MPP5B;MPP5	MAGUK P55 SUBFAMILY MEMBER 5-LIKE, TRANSCRIPT VARIANT X2; MAGUK P55 SUBFAMILY MEMBER 5-LIKE, TRANSCRIPT VARIANT X3; MAGUK P55 SUBFAMILY MEMBER 5-LIKE, TRANSCRIPT VARIANT X1;MPP5	MPP5	MPP5_MOUSE;MPP5	HYPOTHETICAL PROTEIN;PUTATIVE MAGUK P55 SUBFAMILY MEMBER 5 ISOFORM X2	MPP5_HUMAN	UNCHARACTERIZED LOC105445791, TRANSCRIPT VARIANT X2; UNCHARACTERIZED LOC105445791, TRANSCRIPT VARIANT X1;MAGUK P55 SUBFAMILY MEMBER 5, TRANSCRIPT VARIANT X2; MAGUK P55 SUBFAMILY MEMBER 5, TRANSCRIPT VARIANT X1;MPP5
4972	PORTHOMCL4972[AjBfCgCiDrGgLvMmOjOlPsSpXl|(15 genes, 13 taxa)]:	-0.417418	-0.614242	-0.601758	-0.311348	-0.251912	-0.124618	-0.275558	-0.61127	-0.836647	-0.535996	-0.765196	-0.401015	NOC2L	NOC2L	NOC2L	NOC2L.S;NOC2L.L;NOC2L	NOC2L	NOC2L	NUCLEOLAR COMPLEX PROTEIN 2 HOMOLOG, TRANSCRIPT VARIANT X1; NUCLEOLAR COMPLEX PROTEIN 2 HOMOLOG, TRANSCRIPT VARIANT X2;NOC2L	NOC2L	NOC2L_MOUSE;NOC2L	PUTATIVE NUCLEOLAR COMPLEX PROTEIN 2-LIKE	NOC2L_BOVIN;NOC2L	NUCLEOLAR COMPLEX PROTEIN 2 HOMOLOG;NOC2L
3176	PORTHOMCL3176[AjBfCgCiDrGgLvMmOjOlPsSpXl|(17 genes, 13 taxa)]:	-0.0315934	-0.370769	-0.297637	-0.856959	-0.115123	-0.575184	-0.645169	-0.307273	0.404294	-0.110609	0.513736	-0.399963	TUBB		TUBB2B	TUBB2B.L;LOC108706200	TUBB2	TUBB2;TUBB2B	TUBULIN BETA CHAIN;TUBB4A		TBB4B_RAT;TBB_STRPU	PUTATIVE TUBULIN BETA CHAIN-LIKE;TUBB4A	TBB_STRPU	TUBULIN BETA CHAIN-LIKE
1267	PORTHOMCL1267[AjBfCiDrGgLvMmOjOlPsSpXl|(26 genes, 12 taxa)]:	-0.0617582	-0.387912	-0.902088	-0.28201	-0.171044	-0.452765	-0.259896	-0.674545	0.371559	0.203963	0.455882	-0.399002	SYNE2;SYNE1	SYNE2	SYNE2	LOC108698815	SYNE2B	SYNE1A;SYNE2B;SI:DKEYP-77C8.2;SI:CH211-207I1.2;SYNE1	NESPRIN-1, TRANSCRIPT VARIANT X1; NESPRIN-1, TRANSCRIPT VARIANT X2		SYNE1_HUMAN	PUTATIVE NESPRIN-1 ISOFORM X3;PUTATIVE NESPRIN-1-LIKE;PUTATIVE NESPRIN-1 ISOFORM X1;SYNE2B	SYNE1_HUMAN;SYNE1_MOUSE	NESPRIN-1, TRANSCRIPT VARIANT X2; NESPRIN-1, TRANSCRIPT VARIANT X3; NESPRIN-1, TRANSCRIPT VARIANT X1
6473	PORTHOMCL6473[AjBfCgCiDrGgLvMmOlPsSpXl|(13 genes, 12 taxa)]:	-0.0908242	-0.63156	-0.453956	-0.373309	-0.529191	-0.0247059	-0.865	-0.135594	0	-0.611455	-0.369608	-0.388018	DNAJC21	DNAJC21	DNAJC21	DNAJC21.L;DNAJC21	DNAJC21	DNAJC21	ZN-FINGER (U1-LIKE)-8, TRANSCRIPT VARIANT X1; ZN-FINGER (U1-LIKE)-8;DNAJC21	DNAJC21		HYPOTHETICAL PROTEIN;DNAJC21	DJC21_BOVIN;DNAJC21	DNAJ HOMOLOG SUBFAMILY C MEMBER 21
3283	PORTHOMCL3283[AjBfCgCiDrGgLvMmOjOlPsSpXl|(17 genes, 13 taxa)]:	-0.329341	-0.608923	-0.551429	-0.273578	-0.45027	-0.303206	-0.439935	-0.113566	-0.867647	-0.677853	-0.707598	-0.383781	DDX54	DDX54	DDX54	DDX54.L	DDX54	DDX54	ATP-DEPENDENT RNA HELICASE DDX54, TRANSCRIPT VARIANT X2;DDX54	DDX54;DDX27	DDX54_MOUSE;DDX54	PUTATIVE ATP-DEPENDENT RNA HELICASE DDX54;DDX54	DDX54_MOUSE;DDX54	ATP-DEPENDENT RNA HELICASE DDX54;DDX54
2397	PORTHOMCL2397[AjBfCgCiDrGgLvMmOjOlPsSpXl|(20 genes, 13 taxa)]:	-0.416484	-0.426462	-0.0985165	-0.577132	-0.205049	-0.419324	-0.605792	-0.300519	-0.158824	-0.168586	-0.577819	-0.38116	SLC25A3	SLC25A3	SLC25A3	SLC25A3.S;SLC25A3.L;SLC25A3	SLC25A3A;SLC25A3	SLC25A3A;SLC25A3B;SLC25A3	PHOSPHATE CARRIER PROTEIN, MITOCHONDRIAL;SLC25A3	SLC25A3	MPCP_MOUSE;MPCP_CHOFU;SLC25A3	PUTATIVE PHOSPHATE CARRIER PROTEIN, MITOCHONDRIAL;SLC25A3	MPCP_MOUSE;SLC25A3	PHOSPHATE CARRIER PROTEIN, MITOCHONDRIAL;SLC25A3
7684	PORTHOMCL7684[BfCgCiDrGgMmOjOlPsSpXl|(12 genes, 11 taxa)]:	-0.264396	-0.657538	-0.50033	-0.0689706	-0.253775	-0.766265	-0.304026	-0.169833	-0.321382	0	-0.529902	-0.373142	PSMG2	PSMG2	PSMG2	PSMG2.L;PSMG2	PSMG2	PSMG2	PROTEASOME ASSEMBLY CHAPERONE 2-LIKE	PSMG2	PSMG2_DANRE;PSMG2			PROTEASOME ASSEMBLY CHAPERONE 2;PROTEASOME ASSEMBLY CHAPERONE 2-LIKE
3409	PORTHOMCL3409[AjBfCgCiDrGgLvMmOjOlPsSpXl|(17 genes, 13 taxa)]:	-0.139699	-0.867253	-0.811209	-0.208971	-0.0775732	-0.585229	-0.0383896	-0.250919	-0.402382	-0.345243	-0.233211	-0.372405	WDR78	WDR78	WDR78	WDR78.S;WDR78	WDR78;WD REPEAT-CONTAINING PROTEIN 78	WDR78	WD REPEAT-CONTAINING PROTEIN 78;WDR78	WDR78	WDR78_HUMAN;WDR78_RAT	PUTATIVE WD REPEAT-CONTAINING PROTEIN 78;WDR78	WDR78_RAT;WDR78	WD REPEAT-CONTAINING PROTEIN 78, TRANSCRIPT VARIANT X1; WD REPEAT-CONTAINING PROTEIN 78, TRANSCRIPT VARIANT X4; WD REPEAT-CONTAINING PROTEIN 78, TRANSCRIPT VARIANT X3; WD REPEAT-CONTAINING PROTEIN 78, TRANSCRIPT VARIANT X2;WD REPEAT-CONTAINING PROTEIN 78;WDR78
6123	PORTHOMCL6123[AjBfCgCiDrGgMmOjOlPsSpXl|(13 genes, 12 taxa)]:	-0.0285165	-0.465407	-0.122692	-0.598064	-0.169853	-0.251941	-0.568859	-0.772653	0.435971	0	0.326716	-0.372248	VPS25	VPS25	VPS25	LOC108702200;VPS25.L;VPS25	VPS25	VPS25	VACUOLAR PROTEIN-SORTING-ASSOCIATED PROTEIN 25-LIKE	VPS25	VPS25_DANRE;VPS25	PUTATIVE VACUOLAR PROTEIN-SORTING-ASSOCIATED PROTEIN 25		VACUOLAR PROTEIN-SORTING-ASSOCIATED PROTEIN 25;VPS25
3199	PORTHOMCL3199[AjBfCgCiDrGgLvMmOjOlPsSpXl|(17 genes, 13 taxa)]:	-0.166758	-0.558374	-0.551758	-0.351985	-0.594093	-0.522382	-0.183961	-0.0381818	-0.705235	-0.44516	-0.385049	-0.370937	EIF3L	EIF3L	EIF3L	EIF3L.S;EIF3L.L;EIF3L	EIF3S6IP;EIF3L	EIF3S6IP;EIF3L	EUKARYOTIC TRANSLATION INITIATION FACTOR 3 SUBUNIT L-LIKE;EIF3L	EIF3L	EIF3L_DANRE;EIF3L	PUTATIVE EUKARYOTIC TRANSLATION INITIATION FACTOR 3 SUBUNIT L;PUTATIVE EUKARYOTIC TRANSLATION INITIATION FACTOR 3 SUBUNIT L ISOFORM X1;EIF3L	EIF3L_BOVIN;EIF3L	EUKARYOTIC TRANSLATION INITIATION FACTOR 3 SUBUNIT L;EIF3L
1420	PORTHOMCL1420[AjBfCgCiDrGgLvMmOjOlPsSpXl|(25 genes, 13 taxa)]:	-0.6787	-0.162602	-0.0410284	-0.261672	-0.375486	-0.36303	-0.720597	-0.357762	0.291235	0.324743	0.190415	-0.37011	RFX6	RFX6;RFX8	RFX6	RFX6.L;RFX6	RFX6	RFX6	DNA-BINDING PROTEIN RFX6-LIKE	RFX6;RFX4	RFX3_XENTR;RFX6_AILME;RFX2	PUTATIVE DNA-BINDING PROTEIN RFX6-LIKE;HYPOTHETICAL PROTEIN;PUTATIVE DNA-BINDING PROTEIN RFX6;RFX6	RFX6_DANRE;RFX6	DNA-BINDING PROTEIN RFX6;RFX6
3488	PORTHOMCL3488[AjBfCiDrGgMmOjOlPsXl|(17 genes, 10 taxa)]:	-0.200165	-0.107516	-0.616484	-0.170564	-0.0405882	-0.517118	-0.619571	-0.678716	-0.892941	0	0	-0.36884		ZNF687	ZFP592;ZFP687;ZNF592;ZNF687	ZNF592.L;LOC108699467;ZNF592.S;ZNF592	ZNF687A;ZNF532	ZNF592;ZNF687A	ZINC FINGER (C2H2)-99		ZN592_MOUSE	PUTATIVE ZINC FINGER PROTEIN
5256	PORTHOMCL5256[AjBfCiDrGgLvMmOjOlPsSpXl|(14 genes, 12 taxa)]:	-0.343901	-0.798286	-0.508407	-0.266078	-0.34125	-0.103735	-0.152156	-0.346853	0.217529	-0.564665	-0.733333	-0.357583	MRPS30	MRPS30	MRPS30	MRPS30.L;MRPS30.S;MRPS30	MRPS30	MRPS30	28S RIBOSOMAL PROTEIN S30, MITOCHONDRIAL-LIKE		RT30_BOVIN	PUTATIVE 28S RIBOSOMAL PROTEIN S30, MITOCHONDRIAL	RT30_BOVIN	28S RIBOSOMAL PROTEIN S30, MITOCHONDRIAL
3786	PORTHOMCL3786[AjBfCgCiDrGgLvMmOjOlPsSpXl|(16 genes, 13 taxa)]:	-0.0303846	-0.261758	-0.370769	-0.161054	-0.527475	-0.117618	-0.563688	-0.789785	-0.691735	-0.757606	-0.77549	-0.352817	DHDDS	DHDDS	DHDDS	DHDDS.L;DHDDS.S;DHDDS	DHDDS	DHDDS	DEHYDRODOLICHYL DIPHOSPHATE SYNTHASE COMPLEX SUBUNIT DHDDS-LIKE;DHDDS	DHDDS	DHDDS_HUMAN;DHDDS	PUTATIVE DEHYDRODOLICHYL DIPHOSPHATE SYNTASE COMPLEX SUBUNIT DHDDS;DHDDS	DHDDS_HUMAN;DHDDS	DEHYDRODOLICHYL DIPHOSPHATE SYNTASE COMPLEX SUBUNIT DHDDS;DHDDS
3754	PORTHOMCL3754[AjBfCgCiDrGgLvMmOjOlPsSpXl|(16 genes, 13 taxa)]:	-0.00368132	-0.700088	-0.488297	-0.0914461	-0.330539	-0.227529	-0.482766	-0.434039	-0.859265	0.00908153	-0.402083	-0.344798	TBC1D13	TBC1D13	TBC1D13	TBC1D13.L;TBC1D13.S;TBC1D13	TBC1D13	TBC1D13	TBC1 DOMAIN FAMILY MEMBER 13;TBC1D13	TBC1D13	TBC13_HUMAN;TBC1D13	PUTATIVE TBC1 DOMAIN FAMILY MEMBER 13-LIKE;TBC1D13	TBC13_HUMAN;TBC1D13	TBC1 DOMAIN FAMILY MEMBER 13-LIKE;TBC1D13
3570	PORTHOMCL3570[AjBfCgCiDrGgLvMmOjOlPsSpXl|(17 genes, 13 taxa)]:	-0.0534615	-0.60422	-0.540604	-0.0538725	-0.297647	-0.119706	-0.558584	-0.448277	-0.915618	-0.428751	-0.383333	-0.334547		WDR74	WDR74;GM45736	WDR74.L;WDR74	WDR74	WDR74	WD REPEAT-CONTAINING PROTEIN 74-LIKE, TRANSCRIPT VARIANT X2; WD REPEAT-CONTAINING PROTEIN 74-LIKE, TRANSCRIPT VARIANT X1; WD REPEAT-CONTAINING PROTEIN 74-LIKE, TRANSCRIPT VARIANT X3;WDR74	WDR74	WDR74_BOVIN	PUTATIVE WD REPEAT-CONTAINING PROTEIN 74 ISOFORM X2;WDR74	WDR74_BOVIN	WD REPEAT-CONTAINING PROTEIN 74;WDR74
3407	PORTHOMCL3407[AjBfCgCiDrGgMmOjOlPsSpXl|(17 genes, 12 taxa)]:	-0.220989	-0.624703	-0.088022	-0.188456	-0.00333333	-0.216	-0.866935	-0.418507	0.597546	0	0.170236	-0.328368	CLEC16A	CLEC16A	CLEC16A	CLEC16A.L;CLEC16A.S;CLEC16A	CLEC16A	CLEC16A	PROTEIN CLEC16A-LIKE, TRANSCRIPT VARIANT X3; PROTEIN CLEC16A-LIKE, TRANSCRIPT VARIANT X2; PROTEIN CLEC16A-LIKE, TRANSCRIPT VARIANT X1;CLEC16A			HYPOTHETICAL PROTEIN;CLEC16A		PROTEIN CLEC16A-LIKE
3523	PORTHOMCL3523[AjBfCgCiDrGgLvMmOjOlPsSpXl|(17 genes, 13 taxa)]:	-0.141538	-0.151297	-0.0404945	-0.649657	-0.102157	-0.190824	-0.648519	-0.692031	-0.911	-0.490237	-0.360662	-0.327065	PDCL3;PDCL2	PDCL3;PDCL2	PDCL3;PDCL2	PDCL3.S;PDCL3.L;PDCL3	PDCL3	PDCL3	PHOSDUCIN-LIKE PROTEIN 3;PDCL3	PDCL3	PDCL3_DANRE;PDCL3	PUTATIVE VIRAL IAP-ASSOCIATED FACTOR-LIKE ISOFORM X1;PDCL3	VIAF1_DROME;PDCL3	VIRAL IAP-ASSOCIATED FACTOR HOMOLOG, TRANSCRIPT VARIANT X1; VIRAL IAP-ASSOCIATED FACTOR HOMOLOG, TRANSCRIPT VARIANT X2
1482	PORTHOMCL1482[AjBfCgCiDrGgLvMmOjOlPsSpXl|(24 genes, 13 taxa)]:	-0.0681319	-0.0244835	-0.474176	-0.657034	-0.0923039	-0.0615294	-0.685818	-0.524167	0.249647	-0.737853	0.144942	-0.323456	UBR3	UBR3	UBR3	LOC108701846;UBR3	UBR3	UBR3	E3 UBIQUITIN-PROTEIN LIGASE UBR3		UBR3_HUMAN;UBR3_MOUSE	PUTATIVE E3 UBIQUITIN-PROTEIN LIGASE UBR3;PUTATIVE E3 UBIQUITIN-PROTEIN LIGASE UBR3-LIK E	UBR3_HUMAN	E3 UBIQUITIN-PROTEIN LIGASE UBR3
4951	PORTHOMCL4951[AjBfCgCiDrGgLvMmOjOlPsSpXl|(15 genes, 13 taxa)]:	-0.357418	-0.574769	-0.531758	-0.0124265	-0.350294	-0.258324	-0.0160909	-0.45875	-0.852353	-0.754964	-0.661642	-0.319979	PPAT	PPAT	PPAT	PPAT.S;PPAT.L;PPAT	PPAT	PPAT	AMIDOPHOSPHORIBOSYLTRANSFERASE-LIKE, TRANSCRIPT VARIANT X1; AMIDOPHOSPHORIBOSYLTRANSFERASE-LIKE, TRANSCRIPT VARIANT X2;PPAT	PPAT	PUR1_CHICK;PUR1_HUMAN;PPAT	PUTATIVE AMIDOPHOSPHORIBOSYLTRANSFERASE	ATP7B_MOUSE	AMIDOPHOSPHORIBOSYLTRANSFERASE;PPAT
3072	PORTHOMCL3072[AjBfCgCiDrGgLvMmOjOlPsSpXl|(18 genes, 13 taxa)]:	-0.0899451	-0.660703	-0.447308	-0.157328	-0.226348	-0.267559	-0.603519	-0.0398738	0.367706	-0.487307	-0.0775735	-0.311573	WDR60	WDR60	WDR60	WDR60.L;WDR60.S;WDR60	WDR60	WDR60	WD REPEAT-CONTAINING PROTEIN 60-LIKE		WDR60_MOUSE	PUTATIVE WD REPEAT-CONTAINING PROTEIN 60 ISOFORM X2	WDR60_MOUSE;WDR60	WD REPEAT-CONTAINING PROTEIN 60, TRANSCRIPT VARIANT X1; WD REPEAT-CONTAINING PROTEIN 60, TRANSCRIPT VARIANT X2;WDR60
2578	PORTHOMCL2578[AjBfCgCiDrGgLvMmOjOlPsSpXl|(19 genes, 13 taxa)]:	-0.187308	-0.725187	-0.442088	-0.240931	-0.187108	-0.144294	-0.0204026	-0.225385	-0.214706	-0.821176	-0.173039	-0.271588	TRIP12	TRIP12	TRIP12	TRIP12.S;TRIP12.L;TRIP12	TRIP12	TRIP12	E3 UBIQUITIN-PROTEIN LIGASE TRIP12	TRIP12	TRIPC_MOUSE;TRIP12	PUTATIVE E3 UBIQUITIN-PROTEIN LIGASE TRIP12 ISOFORM X1;PUTATIVE E3 UBIQUITIN-PROTEIN LIGASE TRIP12 ISOFORM X2	TRIPC_HUMAN;TRIPC_XENTR;TRIP12	E3 UBIQUITIN-PROTEIN LIGASE TRIP12, TRANSCRIPT VARIANT X1; E3 UBIQUITIN-PROTEIN LIGASE TRIP12, TRANSCRIPT VARIANT X2;E3 UBIQUITIN-PROTEIN LIGASE TRIP12-LIKE
1449	PORTHOMCL1449[AjBfCgCiDrGgLvMmOjOlPsSpXl|(25 genes, 13 taxa)]:	-0.140165	-0.359473	-0.179451	-0.0133088	-0.403995	-0.0256471	-0.315766	-0.123706	0.713647	0.215294	-0.2	-0.195189	GRB2	GRB2	GRB2	GRB2.S;GRB2.L;GRB2	GRB2B;GRB2	GRB2B;GRB2A;GRB2	PROTEIN ENHANCER OF SEVENLESS 2B;GROWTH FACTOR RECEPTOR-BOUND PROTEIN 2-LIKE;GRB2	GRB2	GRB2_MOUSE;GRAPL_HUMAN;GRB2	PUTATIVE GROWTH FACTOR RECEPTOR-BOUND PROTEIN 2;PUTATIVE GROWTH FACTOR RECEPTOR-BOUND PROTEIN 2-LIKE;GRB2	GRB2_RAT;DRK_DROSI;GRB2	PROTEIN ENHANCER OF SEVENLESS 2B;GROWTH FACTOR RECEPTOR-BOUND PROTEIN 2, TRANSCRIPT VARIANT X2; GROWTH FACTOR RECEPTOR-BOUND PROTEIN 2, TRANSCRIPT VARIANT X1; GROWTH FACTOR RECEPTOR-BOUND PROTEIN 2, TRANSCRIPT VARIANT X3;GRB2-RELATED ADAPTER PROTEIN-LIKE;GRB2
