# Supplementary material for: Derivedness Index for Estimating Degree of Phenotypic Evolution of Embryos: A Study of Comparative Transcriptomic Analyses of Chordates and Echinoderms
Source: Front Cell Dev Biol. 2021 Nov 26;9:749963. doi: 10.3389/fcell.2021.749963 (PMC8661034; doi:10.3389/fcell.2021.749963)
Supplement: Supplementary file 2 [file Table3.XLSX]

## Sheet: Sheet1
ortholog-group ID		Correlation in each species											Mean correlation	Annotation in vertebrates						Annotation in chordates		Annotation in echinoderms
ortho_id	ortho_id_full	Gg	Ps	Mm	Xl	Ol	Dr	Ci	Bf	Oj	Lv	Sp	chordates_mean	chicken(Gg)	turtle(Ps)	mouse(Mm)	frog(Xl)	medaka(Ol)	zebrafish(Dr)	tunicate(Ci)	amphioxus(Bf)	feather star(Oj)	sea cucumber (Aj)	green sea urchin (Lv)	purple sea urchin (Sp)
4584	PORTHOMCL4584[AjBfCgCiDrGgLvMmOjOlPsSpXl|(15 genes, 13 taxa)]:	-0.483407	-0.647912	-0.466374	-0.880172	0.367917	0.138706	-0.802558	-0.650705	-0.927647	-0.882353	-0.734436	-0.848145	TRAP1	TRAP1	TRAP1	TRAP1.S	TRAP1	TRAP1	HEAT SHOCK PROTEIN 75 KDA, MITOCHONDRIAL-LIKE;TRAP1	TRAP1	TRAP1_HUMAN;TRAP1_RAT	PUTATIVE HEAT SHOCK PROTEIN 75 KDA, MITOCHONDRIAL;TRAP1	TRAP1_HUMAN	HEAT SHOCK PROTEIN 75 KDA, MITOCHONDRIAL;TRAP1
6845	PORTHOMCL6845[AjBfCiDrGgLvMmOjPsSpXl|(13 genes, 11 taxa)]:	-0.394945	-0.378374	-0.546374	-0.16652	0	-0.225265	-0.639636	-0.273217	-0.912	-0.88128	-0.750123	-0.847801	UTP14A		UTP14A;UTP14B	UTP14A.L;UTP14A		UTP14C	U3 SMALL NUCLEOLAR RNA-ASSOCIATED PROTEIN 14 HOMOLOG A-LIKE		UT14A_BOVIN;UTP14C	PUTATIVE U3 SMALL NUCLEOLAR RNA-ASSOCIATED PROTEIN 14-LIKE A	UT14B_MOUSE	U3 SMALL NUCLEOLAR RNA-ASSOCIATED PROTEIN 14 HOMOLOG A
4974	PORTHOMCL4974[AjBfCgCiDrGgLvMmOjOlPsSpXl|(15 genes, 13 taxa)]:	-0.429176	-0.827385	0.870799	0.189387	-0.204951	0.228647	-0.579208	0.371399	-0.878294	-0.898906	-0.765196	-0.847465	SDR42E1	SDR42E1	SDR42E1	SDR42E1.L;SDR42E1	SDR42E1	SDR42E1	SHORT-CHAIN DEHYDROGENASE/REDUCTASE FAMILY 42E MEMBER 1;SDR42E1		D42E1_BOVIN;SDR42E1	PUTATIVE SHORT-CHAIN DEHYDROGENASE/REDUCTASE FAMILY 42E MEMBER 1;SDR42E1	D42E1_BOVIN;SDR42E1	SHORT-CHAIN DEHYDROGENASE/REDUCTASE FAMILY 42E MEMBER 1;SDR42E1
2835	PORTHOMCL2835[AjBfCgCiDrGgLvMmOjOlPsSpXl|(18 genes, 13 taxa)]:	-0.601703	-0.847385	-0.55011	-0.270319	0.168407	-0.061	-0.768662	-0.434039	-0.881676	-0.846254	-0.807108	-0.845013	MRPL19	MRPL19	MRPL19	LOC108718270;MRPL19	MRPL19	MRPL19	39S RIBOSOMAL PROTEIN L19, MITOCHONDRIAL-LIKE	MRPL19	RM19_BOVIN;MRPL19	PUTATIVE 39S RIBOSOMAL PROTEIN L19, MITOCHONDRIAL;MRPL19	RM19_BOVIN;MRPL19	39S RIBOSOMAL PROTEIN L19, MITOCHONDRIAL;39S RIBOSOMAL PROTEIN L19, MITOCHONDRIAL-LIKE;MRPL19
5291	PORTHOMCL5291[AjBfCgCiDrGgLvMmOjOlSpXl|(14 genes, 12 taxa)]:	-0.416978	0	-0.544835	-0.248088	0.146716	0.345882	-0.517312	-0.690544	-0.916265	-0.821011	-0.792402	-0.843226	RRP9		RRP9	RRP9.S;RRP9	RRP9	PLRG1;RRP9	U3 SMALL NUCLEOLAR RNA-INTERACTING PROTEIN 2-LIKE;RRP9	RRP9	U3IP2_MOUSE;RRP9	PUTATIVE U3 SMALL NUCLEOLAR RNA-INTERACTING PROTEIN 2-LIKE;RRP9	U3IP2_MOUSE;RRP9	U3 SMALL NUCLEOLAR RNA-INTERACTING PROTEIN 2, TRANSCRIPT VARIANT X2; U3 SMALL NUCLEOLAR RNA-INTERACTING PROTEIN 2, TRANSCRIPT VARIANT X1;RRP9
11132	PORTHOMCL11132[GgLvMmOjOlSpXl|(7 genes, 7 taxa)]:	-0.506813	0	-0.568462	-0.672892	0.116765	0	0	0	-0.857294	-0.941796	-0.716176	-0.838422			IPO5	IPO5.L	KPNB3;IPO5				IPO5_HUMAN;IPO5		IPO5_MOUSE	IMPORTIN-5
4573	PORTHOMCL4573[AjBfCgDrGgLvMmOjOlPsSpXl|(15 genes, 12 taxa)]:	0.25533	-0.619429	-0.847473	-0.312017	-0.770319	-0.0167647	0	-0.498125	-0.852147	-0.881065	-0.78125	-0.838154	THNSL1	THNSL1	THNSL1	THNSL1.L;THNSL1	THNSL1	THNSL1		THNSL1	THNS1_PONAB;THNSL1	PUTATIVE THREONINE SYNTHASE-LIKE 1-LIKE;THNSL1	THNS1_MACFA	THREONINE SYNTHASE-LIKE 1;THNSL1
4037	PORTHOMCL4037[AjBfCgCiDrGgLvMmOjOlPsSpXl|(16 genes, 13 taxa)]:	-0.532253	-0.785978	-0.561319	-0.382083	-0.475392	0.0911765	-0.881403	0.18021	-0.815765	-0.914551	-0.783088	-0.837801	DIEXF;UTP25	DIEXF;UTP25	DIEXF;UTP25	DIEXF.S;DIEXF.L;UTP25	UTP25	DIEXF	DIGESTIVE ORGAN EXPANSION FACTOR HOMOLOG;UTP25	UTP25		PUTATIVE DIGESTIVE ORGAN EXPANSION FACTOR-LIKE;UTP25	DIEXF_DANRE;DIEXF_HUMAN	DIGESTIVE ORGAN EXPANSION FACTOR HOMOLOG
3235	PORTHOMCL3235[AjBfCgCiDrGgLvMmOjOlPsSpXl|(17 genes, 13 taxa)]:	-0.0315934	-0.571912	-0.555495	0.0499755	0.163603	-0.338529	-0.676714	-0.738571	-0.887824	-0.927761	-0.696201	-0.837262	ATP13A1	ATP13A1	ATP13A1	ATP13A1.L;ATP13A1	ATP13A1	ATP13A1	MANGANESE-TRANSPORTING ATPASE 13A1, TRANSCRIPT VARIANT X1; MANGANESE-TRANSPORTING ATPASE 13A1, TRANSCRIPT VARIANT X2;EOG090X00J5	ATP13A1	AT131_HUMAN;ATP13A1	PUTATIVE MANGANESE-TRANSPORTING ATPASE 13A1;HYPOTHETICAL PROTEIN	AT131_HUMAN;ATP13A1	MANGANESE-TRANSPORTING ATPASE 13A1;MANGANESE-TRANSPORTING ATPASE 13A1-LIKE
3552	PORTHOMCL3552[AjBfCgCiDrGgLvMmOjOlPsSpXl|(17 genes, 13 taxa)]:	-0.214341	-0.72378	-0.855879	0.0534559	-0.0302206	-0.187265	-0.914273	-0.678098	-0.901441	-0.816553	-0.791789	-0.836595	UBXN7	UBXN7	UBXN7	UBXN7.L;UBXN7.S;UBXN7	UBXN7	UBXN7	UBX DOMAIN-CONTAINING PROTEIN 7-LIKE, TRANSCRIPT VARIANT X1; UBX DOMAIN-CONTAINING PROTEIN 7-LIKE, TRANSCRIPT VARIANT X2;UBXN7	UBXN7	UBXN7_MOUSE;UBXN7_PONAB;UBXN7	PUTATIVE UBX DOMAIN-CONTAINING PROTEIN 7-LIKE ISOFORM X1	UBXN7_PONAB;UBXN7	UBX DOMAIN-CONTAINING PROTEIN 7;UBXN7
2976	PORTHOMCL2976[AjBfCgCiDrGgLvMmOjOlPsSpXl|(18 genes, 13 taxa)]:	-0.227747	-0.965275	-0.635165	-0.0780637	-0.603505	0.220382	-0.67426	-0.753778	-0.902647	-0.795956	-0.809804	-0.836136	CHEK1	CHEK1	CHEK1	LOC108696394;CHEK1.S;CHEK1	CHEK1	CHEK1	SERINE/THREONINE-PROTEIN KINASE CHK1, TRANSCRIPT VARIANT X2; SERINE/THREONINE-PROTEIN KINASE CHK1, TRANSCRIPT VARIANT X1;CHEK1	CHEK1	CHK1_HUMAN;CHEK1	CHECKPOINT KINASE 1;PUTATIVE CHECKPOINT KINASE 1;CHEK1	CHK1_HUMAN;CHEK1	CHECKPOINT KINASE 1;SERINE/THREONINE-PROTEIN KINASE CHK1-LIKE;CHEK1
2085	PORTHOMCL2085[AjBfCgCiDrGgLvMmOjOlPsSpXl|(21 genes, 13 taxa)]:	-0.371538	-0.679165	-0.490769	0.236838	-0.430343	0.276294	-0.747987	-0.590779	-0.892296	-0.879422	-0.734436	-0.835385	NUP210	NUP210L;NUP210	NUP210;NUP210L	NUP210.L;NUP210	NUP210	NUP210	NUCLEAR PORE MEMBRANE GLYCOPROTEIN 210;NUCLEAR PORE MEMBRANE GLYCOPROTEIN 210-LIKE		PO210_RAT	PUTATIVE NUCLEAR PORE MEMBRANE GLYCOPROTEIN	PO210_RAT	NUCLEAR PORE MEMBRANE GLYCOPROTEIN 210, TRANSCRIPT VARIANT X1; NUCLEAR PORE MEMBRANE GLYCOPROTEIN 210, TRANSCRIPT VARIANT X2;NUP210
943	PORTHOMCL943[AjBfCgCiDrGgLvMmOjOlPsSpXl|(30 genes, 13 taxa)]:	-0.349088	-0.43665	0.20436	0.310222	0.428664	0.770514	-0.769798	0.216014	-0.878412	-0.884045	-0.739583	-0.834014	TDRD1	TDRD1	TDRD1	TDRD1.L	TDRD1	TDRD1	TUDOR DOMAIN-CONTAINING PROTEIN 1-LIKE, TRANSCRIPT VARIANT X2; TUDOR DOMAIN-CONTAINING PROTEIN 1-LIKE, TRANSCRIPT VARIANT X1; TUDOR DOMAIN-CONTAINING PROTEIN 1-LIKE, TRANSCRIPT VARIANT X3; TUDOR DOMAIN-CONTAINING PROTEIN 1-LIKE, TRANSCRIPT VARIANT X4;UNCHARACTERIZED LOC100178786, TRANSCRIPT VARIANT X2; UNCHARACTERIZED LOC100178786, TRANSCRIPT VARIANT X3; UNCHARACTERIZED LOC100178786, TRANSCRIPT V…		TDRD6_HUMAN;TDRD1_HUMAN;TDRD1_DANRE	PUTATIVE TUDOR DOMAIN-CONTAINING PROTEIN 15 ISOFORM X3;HYPOTHETICAL PROTEIN;PUTATIVE TUDOR DOMAIN-CONTAINING PROTEIN 1 ISOFORM X1;PUTATIVE TUDOR DOMAIN-CONTAINING PROTEIN 1 ISOFORM X8	TDR15_HUMAN;TDRD1_HUMAN;TDRD1_ORYLA	TUDOR DOMAIN-CONTAINING PROTEIN 15, TRANSCRIPT VARIANT X4; TUDOR DOMAIN-CONTAINING PROTEIN 15, TRANSCRIPT VARIANT X5; TUDOR DOMAIN-CONTAINING PROTEIN 15, TRANSCRIPT VARIANT X3; TUDOR DOMAIN-CONTAINING PROTEIN 15, TRANSCRIPT VARIANT X1; TUDOR DOMAIN-CONTAINING PROTEIN 15, TRANSCRIPT VARIANT X2;TUDOR DOMAIN-CONTAINING PROTEIN 1, TRANSCRIPT VARIANT X4; TUDOR DOMAIN-CONTAINING PROTEIN 1, TRANSCRIPT V…
4454	PORTHOMCL4454[AjBfCgCiDrGgLvMmOjOlPsSpXl|(15 genes, 13 taxa)]:	-0.403022	-0.914769	-0.555549	0.0611765	-0.017598	-0.113912	-0.930052	-0.102797	-0.886853	-0.87226	-0.741422	-0.833512	SRP68	SRP68	SRP68	SRP68.L;LOC108702820;SRP68	SRP68	SRP68	SIGNAL RECOGNITION PARTICLE SUBUNIT SRP68, TRANSCRIPT VARIANT X1; SIGNAL RECOGNITION PARTICLE SUBUNIT SRP68, TRANSCRIPT VARIANT X2;SRP68	SRP68	SRP68_CANLF	PUTATIVE SIGNAL RECOGNITION PARTICLE SUBUNIT SRP68;SRP68	SRP68_CANLF;SRP68	SIGNAL RECOGNITION PARTICLE SUBUNIT SRP68;SRP68
6260	PORTHOMCL6260[AjBfCgDrGgLvMmOjOlPsSpXl|(13 genes, 12 taxa)]:	-0.46044	-0.817099	-0.543736	-0.402171	0.12125	-0.13	0	-0.398633	-0.900235	-0.80031	-0.798407	-0.832984	WDR12	WDR12	WDR12	WDR12.S	WDR12	WDR12		WDR12	WDR12_MOUSE;WDR12	PUTATIVE RIBOSOME BIOGENESIS PROTEIN WDR12-LIKE;WDR12	WDR12_MOUSE;WDR12	RIBOSOME BIOGENESIS PROTEIN WDR12, TRANSCRIPT VARIANT X2; RIBOSOME BIOGENESIS PROTEIN WDR12, TRANSCRIPT VARIANT X1;WDR12
2139	PORTHOMCL2139[AjBfCgCiDrGgLvMmOjOlPsSpXl|(21 genes, 13 taxa)]:	0.356538	0.696747	0.583187	0.684093	0.340882	0.108824	-0.347377	-0.306014	-0.835971	-0.835067	-0.822304	-0.831114	STIL;SERPINC1	STIL;SERPINC1	STIL;SERPINC1	STIL.L;SERPINC1.S;STIL	STIL, CENTRIOLAR ASSEMBLY PROTEIN	STIL;SERPINC1	LEUKOCYTE ELASTASE INHIBITOR-LIKE, TRANSCRIPT VARIANT X2; LEUKOCYTE ELASTASE INHIBITOR-LIKE, TRANSCRIPT VARIANT X1;SERPIN B3		STIL_HUMAN	HYPOTHETICAL PROTEIN	STIL_HUMAN	SCL-INTERRUPTING LOCUS PROTEIN HOMOLOG
6681	PORTHOMCL6681[AjBfCgCiDrGgLvMmOjOlPsSpXl|(13 genes, 13 taxa)]:	-0.571648	-0.578066	-0.569231	-0.421838	-0.157426	-0.199853	-0.773247	0.165105	-0.871647	-0.753911	-0.842525	-0.822694	ORC2	ORC2	ORC2	ORC2.S;ORC2	ORC2	ORC2	ORIGIN RECOGNITION COMPLEX SUBUNIT 2-LIKE;ORC2	ORC2	ORC2_HUMAN;ORC2	PUTATIVE ORIGIN RECOGNITION COMPLEX SUBUNIT 2-LIKE;ORC2	ORC2_XENLA	ORIGIN RECOGNITION COMPLEX SUBUNIT 2;ORC2
3672	PORTHOMCL3672[AjBfCgCiDrGgLvMmOjOlPsSpXl|(16 genes, 13 taxa)]:	-0.701868	-0.541538	-0.0587363	-0.197913	-0.64576	-0.4795	-0.839026	0.33972	-0.830294	-0.86236	-0.774877	-0.822511	HMBS	HMBS	HMBS	HMBS.2.S	HMBSA	HMBSB;HMBSA	PORPHOBILINOGEN DEAMINASE;HMBS	HMBS	HEM3_HUMAN;HMBS	PUTATIVE PORPHOBILINOGEN DEAMINASE ISOFORM X2;HMBS	HEM3_HUMAN	PORPHOBILINOGEN DEAMINASE, TRANSCRIPT VARIANT X1; PORPHOBILINOGEN DEAMINASE, TRANSCRIPT VARIANT X2
8180	PORTHOMCL8180[AjCiDrGgLvMmOjOlPsSpXl|(11 genes, 11 taxa)]:	-0.485714	-0.747429	-0.568187	0.347475	-0.0866912	0.708912	-0.871117	0	-0.870118	-0.854716	-0.740895	-0.82191	TRAIP	TRAIP	TRAIP	TRAIP.L;TRAIP	TRAIP	TRAIP	E3 UBIQUITIN-PROTEIN LIGASE TRAIP-LIKE		TRAIP_MOUSE	PUTATIVE E3 UBIQUITIN-PROTEIN LIGASE TRAIP	TRAIP_HUMAN	E3 UBIQUITIN-PROTEIN LIGASE TRAIP
3864	PORTHOMCL3864[AjBfCgCiDrGgLvMmOjOlPsSpXl|(16 genes, 13 taxa)]:	0.306978	-0.853802	-0.367033	-0.456765	-0.273554	-0.238147	-0.740416	-0.832517	-0.876794	-0.904706	-0.679289	-0.820263	SMARCC2	SMARCC1	SMARCC2	SMARCC2.L	SWI/SNF RELATED, MATRIX ASSOCIATED, ACTIN DEPENDENT REGULATOR OF CHROMATIN SUBFAMILY C MEMBER 1;SMARCC1	SMARCC2;SMARCC1B	SWI/SNF COMPLEX SUBUNIT SMARCC2;SMARCC1	SMARCC2	SMRC2_HUMAN;SMARCC2	PUTATIVE SWI/SNF COMPLEX SUBUNIT SMARCC2 ISOFORM X4;PUTATIVE SWI/SNF COMPLEX SUBUNIT SMARCC2 ISOFORM X1	SMRC2_HUMAN	SWI/SNF COMPLEX SUBUNIT SMARCC2, TRANSCRIPT VARIANT X2; SWI/SNF COMPLEX SUBUNIT SMARCC2, TRANSCRIPT VARIANT X3; SWI/SNF COMPLEX SUBUNIT SMARCC2, TRANSCRIPT VARIANT X1; SWI/SNF COMPLEX SUBUNIT SMARCC2, TRANSCRIPT VARIANT X4;SWI/SNF COMPLEX SUBUNIT SMARCC2
4372	PORTHOMCL4372[AjBfCgCiDrGgLvMmOjOlPsSpXl|(15 genes, 13 taxa)]:	0	-0.197852	0	0.310959	0.444249	0.710208	-0.789558	0.832797	-0.889088	-0.779876	-0.785049	-0.818004	DDX43	DDX43	DDX43	DDX43.L;DDX43	DDX43	DDX43	PROBABLE ATP-DEPENDENT RNA HELICASE DDX43	DDX43	DDX43_HUMAN;DDX43	PUTATIVE ATP-DEPENDENT RNA HELICASE DDX43;DDX43	DDX43_HUMAN	ATP-DEPENDENT RNA HELICASE DBP2;DDX43
5574	PORTHOMCL5574[AjBfCgCiDrGgLvMmOjOlPsSpXl|(14 genes, 13 taxa)]:	-0.400385	-0.463253	-0.553352	-0.156054	-0.582794	-0.230382	-0.802182	0.509269	-0.892	-0.817915	-0.743382	-0.817766	PABPC4	PABPC1L	RBM28	RBM28.L;RBM28	RBM28	RBM28	RNA-BINDING PROTEIN 28;RBM28	LOC106181816	RBM28_MOUSE	PUTATIVE RNA-BINDING PROTEIN 28	RBM28_MOUSE	RNA-BINDING PROTEIN 28;RBM28
3368	PORTHOMCL3368[AjBfCgCiDrGgLvMmOjOlPsSpXl|(17 genes, 13 taxa)]:	-0.418407	-0.577363	-0.543462	0.174853	0.151838	-0.0568529	-0.677325	-0.825732	-0.901529	-0.787822	-0.758578	-0.815977	PDCD11	PDCD11	PDCD11	PDCD11.L;PDCD11	PDCD11	PDCD11	PROTEIN RRP5 HOMOLOG, TRANSCRIPT VARIANT X1; PROTEIN RRP5 HOMOLOG, TRANSCRIPT VARIANT X2;PROTEIN RRP5 HOMOLOG		RRP5_BOVIN	HYPOTHETICAL PROTEIN	RRP5_MOUSE;RRP5_HUMAN	PROTEIN RRP5 HOMOLOG
2948	PORTHOMCL2948[AjBfCgCiDrGgLvMmOjOlPsSpXl|(18 genes, 13 taxa)]:	-0.449615	-0.849802	-0.551319	0.181103	-0.206127	0.213147	-0.85561	0.738811	-0.908186	-0.842188	-0.694975	-0.815116	HELLS	HELLS	HELLS	HELLS.L;HELLS.S	HELLS	HELLS	PUTATIVE DNA HELICASE INO80;LYMPHOCYTE-SPECIFIC HELICASE-LIKE;HELLS	HELLS	HELLS_HUMAN;HELLS	PUTATIVE LYMPHOID-SPECIFIC HELICASE;HELLS	HELLS_HUMAN	SWI/SNF-RELATED MATRIX-ASSOCIATED ACTIN-DEPENDENT REGULATOR OF CHROMATIN SUBFAMILY A MEMBER 5, TRANSCRIPT VARIANT X4; SWI/SNF-RELATED MATRIX-ASSOCIATED ACTIN-DEPENDENT REGULATOR OF CHROMATIN SUBFAMILY A MEMBER 5, TRANSCRIPT VARIANT X1; SWI/SNF-RELATED MATRIX-ASSOCIATED ACTIN-DEPENDENT REGULATOR OF CHROMATIN SUBFAMILY A MEMBER 5, TRANSCRIPT VARIANT X2; SWI/SNF-RELATED MATRIX-ASSOCIATED ACTIN-DEPEN…
5856	PORTHOMCL5856[AjBfCgDrGgLvMmOjOlPsSpXl|(14 genes, 12 taxa)]:	-0.435769	-0.735121	-0.766648	0.392451	0.140196	-0.0750882	0	0.625455	-0.858971	-0.877399	-0.706005	-0.814125	ARHGAP11A	ARHGAP11A	ARHGAP11A	ARHGAP11A.2.S;ARHGAP11A.1.L;ARHGAP11A	ARHGAP11A	ARHGAP11A			RHGBA_HUMAN	HYPOTHETICAL PROTEIN	RHGBA_MOUSE	UNCHARACTERIZED LOC580885
4910	PORTHOMCL4910[AjBfCgDrGgLvMmOjOlPsSpXl|(15 genes, 12 taxa)]:	0.685879	-0.661934	0.271044	-0.626054	-0.0547482	0.336971	0	-0.396932	-0.891176	-0.872306	-0.678554	-0.814012	NOCT	CCRN4L;NOCT	NOCT	NOCT.S;NOCT.L;NOCT	NOCTB;NOCT (1 OF MANY)	NOCT (1 OF MANY);NOCTA;NOCT		NOCT	NOCT_XENLA;NOCT	PUTATIVE NOCTURNIN ISOFORM X4	NOCT_XENLA;NOCT	NOCTURNIN
6781	PORTHOMCL6781[AjCgCiDrLvMmOjOlPsSpXl|(13 genes, 11 taxa)]:	0	-0.75578	-0.565989	-0.631397	-0.216569	0.669382	-0.791701	0	-0.837118	-0.797853	-0.806495	-0.813822		SKA1	SKA1	SKA1.L;SKA1	SKA1	SKA1	SPINDLE AND KINETOCHORE-ASSOCIATED PROTEIN 1-LIKE, TRANSCRIPT VARIANT X3; SPINDLE AND KINETOCHORE-ASSOCIATED PROTEIN 1-LIKE, TRANSCRIPT VARIANT X1; SPINDLE AND KINETOCHORE-ASSOCIATED PROTEIN 1-LIKE, TRANSCRIPT VARIANT X2;LOC100175406		SKA1_XENTR;SKA1	SPINDLE AND KINETOCHORE-ASSOCIATED PROTEIN 1	SKA1_DANRE	SPINDLE AND KINETOCHORE-ASSOCIATED PROTEIN 1
3289	PORTHOMCL3289[AjBfCgCiDrGgLvMmOjOlPsSpXl|(17 genes, 13 taxa)]:	-0.46978	-0.879297	-0.543242	0.381176	0.128235	0.615441	-0.384416	0	-0.867412	-0.855748	-0.71826	-0.813807	AURKA	AURKA	AURKA	AURKA.S;AURKA.L;AURKA	AURKA	AURKA	AURORA KINASE	AURKA	AURKA_MOUSE	AURORA KINASE;PUTATIVE AURORA KINASE A ISOFORM X1;PUTATIVE AURORA KINASE A;AURKA	AURKA_RAT;AURKA	AURORA KINASE A;AURORA KINASE A, TRANSCRIPT VARIANT X2; AURORA KINASE A, TRANSCRIPT VARIANT X1;AURKA
6888	PORTHOMCL6888[BfCgCiDrGgLvMmOjOlPsSpXl|(13 genes, 12 taxa)]:	-0.523132	-0.802945	-0.544396	0.332451	-0.0501716	0.100765	0.0903506	-0.681612	-0.846912	-0.873375	-0.71924	-0.813176	RAE1	RAE1	RAE1	RAE1.L;RAE1.S;RAE1	RAE1	RAE1	MRNA EXPORT FACTOR-LIKE;RAE1	RAE1	RAEL1_PONAB;RAE1		RAE1L_BOVIN	MRNA EXPORT FACTOR, TRANSCRIPT VARIANT X1; MRNA EXPORT FACTOR, TRANSCRIPT VARIANT X2;RAE1
2482	PORTHOMCL2482[AjBfCgCiDrGgLvMmOjOlPsSpXl|(19 genes, 13 taxa)]:	-0.665934	-0.858286	-0.574835	-0.688309	-0.550784	-0.652618	-0.754584	0.215846	-0.8325	-0.846316	-0.760539	-0.813118	IPO7	IPO7;IPO8	IPO7	IPO7.S;LOC108710748;IPO8;IPO7	IPO7;IPO8	IPO7	IMPORTIN-7;IPO8	IPO7	IPO7_HUMAN;IPO7	PUTATIVE IMPORTIN-7;PUTATIVE IMPORTIN-7 ISOFORM X2	IPO7_MOUSE	IMPORTIN-7, TRANSCRIPT VARIANT X2; IMPORTIN-7, TRANSCRIPT VARIANT X1;IPO7
5784	PORTHOMCL5784[AjBfCgCiDrGgLvMmOjOlPsSpXl|(14 genes, 13 taxa)]:	-0.571923	-0.595165	-0.561868	-0.226912	0.025098	-0.355471	-0.797039	0.0111189	-0.911029	-0.805841	-0.71777	-0.811547	NOL10	NOL10	NOL10	NOL10.L;NOL10	NOL10	NOL10	NUCLEOLAR PROTEIN 10;NOL10	NOL10	NOL10_XENLA;NOL10	PUTATIVE NUCLEOLAR PROTEIN 10;NOL10	NOL10_XENLA;NOL10	NUCLEOLAR PROTEIN 10;NOL10
4088	PORTHOMCL4088[AjBfCgCiDrGgLvMmOjOlPsSpXl|(16 genes, 13 taxa)]:	-0.412967	-0.790637	-0.403901	-0.0707353	-0.542843	0.583118	-0.416169	0.165874	-0.878118	-0.837441	-0.718627	-0.811395	DUS3L	DUS3L	DUS3L	DUS3L.L;DUS3L	DUS3L	DUS3L	ZINC FINGER PROTEIN ZF(C3H)-5;DUS3L	DUS3L	DUS3L_XENLA;DUS3L	TRNA-DIHYDROURIDINE SYNTHASE 3-LIKE	DUS3L_XENLA;DUS3L_HUMAN	TRNA-DIHYDROURIDINE(47) SYNTHASE [NAD(P)(+)]-LIKE;DUS3L
4039	PORTHOMCL4039[AjBfCgCiDrGgLvMmOjOlPsSpXl|(16 genes, 13 taxa)]:	-0.107747	-0.94611	-0.622473	0.399216	-0.18049	0.596765	-0.810922	-0.468682	-0.891647	-0.802019	-0.740074	-0.811246	PIBF1	PIBF1	PIBF1	PIBF1.S;PIBF1	PIBF1	PIBF1	PROGESTERONE-INDUCED-BLOCKING FACTOR 1-LIKE;UNCHARACTERIZED LOC108950241;PIBF1	PIBF1	PIBF1_HUMAN;PIBF1	PUTATIVE PROGESTERONE-INDUCED-BLOCKING FACTOR 1 ISOFORM X1;PIBF1	PIBF1_HUMAN;PIBF1	PROGESTERONE-INDUCED-BLOCKING FACTOR 1, TRANSCRIPT VARIANT X1; PROGESTERONE-INDUCED-BLOCKING FACTOR 1, TRANSCRIPT VARIANT X2;PIBF1
6994	PORTHOMCL6994[BfCiDrGgLvMmOjOlSpXl|(13 genes, 10 taxa)]:	-0.413736	0	-0.502967	0.384118	-0.0617892	0.604765	-0.936675	0.856014	-0.890941	-0.837049	-0.702819	-0.810269	SLBP		SLBP	SLBP.S;SLBP.L;SLBP	STEM-LOOP BINDING PROTEIN;SLBP	SLBP	HISTONE RNA HAIRPIN-BINDING PROTEIN-LIKE		SLBP1_XENLA		SLBP1_XENLA	STEM-LOOP BINDING PROTEIN;UNCHARACTERIZED LOC592731
5907	PORTHOMCL5907[AjBfCgCiDrGgLvMmOjOlPsSpXl|(14 genes, 13 taxa)]:	-0.602363	-0.781319	-0.561264	-0.212279	-0.31826	0.307647	-0.863468	-0.839159	-0.839176	-0.819484	-0.768363	-0.809008	DNA2	DNA2	DNA2	DNA2.S;DNA2	DNA2	DNA2	DNA REPLICATION ATP-DEPENDENT HELICASE/NUCLEASE DNA2;DNA2		DNA2_MOUSE;DNA2	PUTATIVE DNA REPLICATION ATP-DEPENDENT HELICASE/NUCLEASE DNA2	DNA2_RAT	DNA REPLICATION ATP-DEPENDENT HELICASE/NUCLEASE DNA2
4497	PORTHOMCL4497[AjBfCgCiDrGgLvMmOjOlPsSpXl|(15 genes, 13 taxa)]:	-0.589835	-0.564923	-0.553242	-0.464583	-0.462451	-0.637706	-0.747831	0.166368	-0.923735	-0.874902	-0.628186	-0.808941	NUP85	NUP85	NUP85	NUP85.L;NUP85	NUP85	NUP85	NUCLEAR PORE COMPLEX PROTEIN NUP85-LIKE;NUP85	NUP85	NUP85_DANRE;NUP85	PUTATIVE NUCLEAR PORE COMPLEX PROTEIN;NUP85	NUP85_DANRE	NUCLEAR PORE COMPLEX PROTEIN NUP85;NUP85
4933	PORTHOMCL4933[AjBfCgCiDrGgLvMmOjOlPsSpXl|(15 genes, 13 taxa)]:	-0.565055	-0.642374	-0.541154	-0.234093	0.126078	-0.424824	-0.820143	0	-0.899265	-0.84646	-0.680637	-0.808787	DDX24	DDX24	DDX24	DDX24.L;DDX24	DDX24	DDX24	ATP-DEPENDENT RNA HELICASE DDX24	DDX24	DDX24_HUMAN;DDX24	HYPOTHETICAL PROTEIN;DDX24	DDX24_HUMAN;DDX24_MOUSE;DDX24	ATP-DEPENDENT RNA HELICASE DDX24
1902	PORTHOMCL1902[AjBfCgCiDrGgLvMmOjOlPsSpXl|(22 genes, 13 taxa)]:	-0.397473	-0.606066	-0.555275	0.420784	0.161471	0.719206	-0.81361	-0.447532	-0.879324	-0.792941	-0.75095	-0.807738	WEE1;WEE2	WEE1	WEE1;WEE2	WEE1.S;WEE2A;WEE2.S;WEE1;WEE2	WEE1;WEE2	WEE1;WEE2	WEE1-LIKE PROTEIN KINASE 1-A		WEE1_RAT	PUTATIVE WEE1-LIKE PROTEIN KINASE 1-B-LIKE;WEE2	WEE1B_XENLA	WEE1-LIKE CDK TYROSINE KINASE;WEE1-LIKE PROTEIN KINASE 2
2245	PORTHOMCL2245[AjBfCgCiDrGgLvMmOjOlPsSpXl|(20 genes, 13 taxa)]:	-0.580165	-0.713275	-0.594725	0.41451	0.0376961	0.395412	-0.871182	-0.410772	-0.892412	-0.816594	-0.713725	-0.807577	SENP1	SENP1	SENP1	SENP1.L;SENP1	SI:DKEY-21C19.3;SENP1	SENP1;SI:DKEYP-82H4.1	SENTRIN-SPECIFIC PROTEASE 1, TRANSCRIPT VARIANT X2; SENTRIN-SPECIFIC PROTEASE 1, TRANSCRIPT VARIANT X3; SENTRIN-SPECIFIC PROTEASE 1, TRANSCRIPT VARIANT X1;LOC100185735		SENP1_MOUSE;SENP1	HYPOTHETICAL PROTEIN;PUTATIVE SENTRIN-SPECIFIC PROTEASE 1;U BOX AND PRE-MRNA-SPLICING FACTOR 19 AND WD40 REPEAT AND PEPTIDASE C48 DOMAIN CONTAINING PROTEIN	SENP1_HUMAN	SENTRIN-SPECIFIC PROTEASE 1-LIKE;SENTRIN-SPECIFIC PROTEASE 1;SENP1
6831	PORTHOMCL6831[AjBfCiDrGgLvMmOjOlPsSpXl|(13 genes, 12 taxa)]:	-0.503352	-0.632659	-0.660165	0.254363	-0.347034	0.463559	-0.869883	0.73049	-0.861647	-0.829804	-0.730882	-0.807444	POP4	POP4	POP4	POP4.L;POP4	POP4	POP4	RIBONUCLEASE P PROTEIN SUBUNIT P29-LIKE		RPP29_BOVIN	PUTATIVE RIBONUCLEASE P PROTEIN SUBUNIT P29	CPSF1_BOVIN	RIBONUCLEASE P PROTEIN SUBUNIT P29
2001	PORTHOMCL2001[AjBfCgCiDrGgLvMmOjOlPsSpXl|(21 genes, 13 taxa)]:	-0.743407	-0.874857	-0.662967	-0.167525	0.0644853	0.0878529	-0.894896	0.49035	-0.899853	-0.862931	-0.655025	-0.805936	PRIM2	PRIM2	PRIM2	PRIM2.S;PRIM2	PRIM2	PRIM2	DNA PRIMASE LARGE SUBUNIT;PRIM2	PRIM2	PRI2_MOUSE;PRI2_HUMAN;PRI2_RAT;PRIM2	PUTATIVE DNA PRIMASE LARGE SUBUNIT-LIKE;PUTATIVE DNA PRIMASE LARGE SUBUNIT;PRIM2	PRI2_MOUSE;PRIM2	DNA PRIMASE LARGE SUBUNIT;PRIM2
7528	PORTHOMCL7528[AjCgGgLvMmOjOlPsSpXl|(12 genes, 10 taxa)]:	-0.469505	-0.865978	-0.849121	0.244378	-0.134461	0	0	0	-0.839235	-0.775459	-0.802696	-0.805797	REXO5	REXO5	2610020H08RIK;REXO5	LOC108703163;REXO5	REXO5				REXON_HUMAN	PUTATIVE SMALL RNA DEGRADING NUCLEASE 5 ISOFORM X2;PUTATIVE SMALL RNA DEGRADING NUCLEASE 5 ISOFORM X1	REXON_BOVIN	SMALL RNA DEGRADING NUCLEASE 5, TRANSCRIPT VARIANT X1; SMALL RNA DEGRADING NUCLEASE 5, TRANSCRIPT VARIANT X2
7275	PORTHOMCL7275[AjBfCgCiGgLvMmOjOlPsSpXl|(12 genes, 12 taxa)]:	-0.345549	-0.269934	0.598352	-0.707475	0.111275	0	-0.918753	-0.875063	-0.856529	-0.793746	-0.766789	-0.805688	EMC2	EMC2	EMC2	EMC2.S	EMC2		ER MEMBRANE PROTEIN COMPLEX SUBUNIT 2-LIKE	EMC2	EMC2_RAT;EMC2	PUTATIVE ER MEMBRANE PROTEIN COMPLEX SUBUNIT 2;EMC2	EMC2B_XENLA;EMC2	ER MEMBRANE PROTEIN COMPLEX SUBUNIT 2;EMC2
3817	PORTHOMCL3817[AjBfCgCiDrLvMmOjOlPsSpXl|(16 genes, 12 taxa)]:	0	-0.267341	-0.626209	0.371225	-0.496225	0.452735	-0.849792	-0.20965	-0.858029	-0.815769	-0.741422	-0.805073		U2AF2	U2AF2	LOC108696656;U2AF2.S;U2AF2	U2AF2A;U2AF2	U2AF2B;U2AF2A;U2AF2	SPLICING FACTOR U2AF 50 KDA SUBUNIT		U2AF2_DROME;U2AF2	HYPOTHETICAL PROTEIN;U2AF2	U2AF2_DROME	SPLICING FACTOR U2AF 50 KDA SUBUNIT
3480	PORTHOMCL3480[AjBfCgCiDrGgLvMmOjOlPsSpXl|(17 genes, 13 taxa)]:	-0.776044	-0.830198	-0.607637	0.240294	-0.0990441	0.422529	-0.845675	-0.0464099	-0.837853	-0.808545	-0.767892	-0.804763	KIAA1524;CIP2A	KIAA1524;CIP2A	C330027C09RIK;CIP2A	KIAA1524.L;CIP2A	CIP2A	ZGC:174160;CIP2A	PROTEIN CIP2A HOMOLOG	CIP2A		HYPOTHETICAL PROTEIN	CIP2A_XENLA;CIP2A	PROTEIN CIP2A HOMOLOG, TRANSCRIPT VARIANT X1; PROTEIN CIP2A HOMOLOG, TRANSCRIPT VARIANT X2;PROTEIN CIP2A HOMOLOG
4702	PORTHOMCL4702[AjBfCgCiDrGgLvMmOjOlPsSpXl|(15 genes, 13 taxa)]:	-0.479451	-0.684	-0.559231	0.173701	-0.0604412	0.220559	-0.674948	-0.703497	-0.897618	-0.759278	-0.753922	-0.803606	BMS1	BMS1	BMS1	BMS1.L;BMS1	BMS1	BMS1	RIBOSOME BIOGENESIS PROTEIN BMS1 HOMOLOG	BMS1	BMS1_HUMAN;BMS1	PUTATIVE RIBOSOME BIOGENESIS PROTEIN BMS1-LIKE;BMS1	BMS1_HUMAN	RIBOSOME BIOGENESIS PROTEIN BMS1 HOMOLOG;BMS1
6561	PORTHOMCL6561[AjBfCgCiDrGgLvMmOjOlPsSpXl|(13 genes, 13 taxa)]:	-0.448571	-0.876352	-0.751209	0.433382	-0.0222059	0.644382	-0.781039	-0.673178	-0.871029	-0.755335	-0.783211	-0.803192	CEP78	CEP78	CEP78	LOC108714551;CEP78	CENTROSOMAL PROTEIN 78;CEP78	CEP78	CENTROSOMAL PROTEIN OF 78 KDA-LIKE	CEP78	CEP78_MOUSE;CEP78	PUTATIVE CENTROSOMAL PROTEIN;CEP78	CEP78_MOUSE	CENTROSOMAL PROTEIN OF 78 KDA, TRANSCRIPT VARIANT X2; CENTROSOMAL PROTEIN OF 78 KDA, TRANSCRIPT VARIANT X1
4201	PORTHOMCL4201[AjCgCiDrGgLvMmOjOlPsSpXl|(16 genes, 12 taxa)]:	0.0423077	-0.118637	-0.558022	-0.805515	0.235637	-0.150971	-0.744688	0	-0.866147	-0.783633	-0.759191	-0.80299	TANGO6	TANGO6	TANGO6	LOC108714069;TANGO6	TANGO6	TANGO6	TRANSPORT AND GOLGI ORGANIZATION PROTEIN 6 HOMOLOG		TNG6_HUMAN	PUTATIVE TRANSPORT AND GOLGI ORGANIZATION PROTEIN 6-LIKE;PUTATIVE TRANSPORT AND GOLGI ORGANIZATION PROTEIN 6-LIKE ISOFORM X4	TNG6_HUMAN	TRANSPORT AND GOLGI ORGANIZATION PROTEIN 6 HOMOLOG
5197	PORTHOMCL5197[AjBfCgCiDrGgLvMmOjOlPsSpXl|(14 genes, 13 taxa)]:	-0.690604	-0.688967	-0.641868	0.276961	-0.0828431	0.693824	-0.00902475	0.713217	-0.863797	-0.75614	-0.788424	-0.802787	DTL	DTL	DTL	DTL.S;DTL.L;DTL	DTL	DTL	DENTICLELESS PROTEIN HOMOLOG, TRANSCRIPT VARIANT X2; DENTICLELESS PROTEIN HOMOLOG, TRANSCRIPT VARIANT X1		DTL_XENTR	PUTATIVE DENTICLELESS PROTEIN-LIKE ISOFORM X1	DTL_XENTR;DTL	DENTICLELESS PROTEIN HOMOLOG, TRANSCRIPT VARIANT X2; DENTICLELESS PROTEIN HOMOLOG, TRANSCRIPT VARIANT X1
5026	PORTHOMCL5026[AjBfCgCiDrGgLvMmOjOlPsSpXl|(15 genes, 13 taxa)]:	0.0346703	-0.501934	-0.57011	0.245931	0.079902	0.550559	-0.898636	-0.44442	-0.894206	-0.785862	-0.724265	-0.801444	CACTIN	CACTIN	CACTIN	CACTIN.S;CACTIN.L;CACTIN	CACTIN	CACTIN	CACTIN, TRANSCRIPT VARIANT X2; CACTIN, TRANSCRIPT VARIANT X1;CACTIN	CACTIN	CATIN_DANRE;CACTIN	PUTATIVE CACTIN ISOFORM X1;CACTIN	CATIN_HUMAN;CACTIN	CACTIN
7194	PORTHOMCL7194[AjBfCgCiGgLvMmOjOlPsSpXl|(12 genes, 12 taxa)]:	-0.412363	-0.862462	-0.549835	0.396642	0.116691	0	-0.798766	0	-0.878441	-0.809313	-0.715564	-0.801106	DONSON	DONSON	DONSON	DONSON.L;DONSON	DOWNSTREAM NEIGHBOR OF SON;DONSON		PROTEIN DOWNSTREAM NEIGHBOR OF SON HOMOLOG		DONS_HUMAN	HYPOTHETICAL PROTEIN	DONS_XENLA	PROTEIN DOWNSTREAM NEIGHBOR OF SON HOMOLOG, TRANSCRIPT VARIANT X2; PROTEIN DOWNSTREAM NEIGHBOR OF SON HOMOLOG, TRANSCRIPT VARIANT X1
3932	PORTHOMCL3932[AjBfCgCiDrGgLvMmOjOlPsSpXl|(16 genes, 13 taxa)]:	-0.578791	-0.794857	-0.856923	-0.397402	-0.401667	0.0869412	-0.70062	-0.26759	-0.916471	-0.79484	-0.690564	-0.800625	ANAPC7	ANAPC7	ANAPC7	ANAPC7.L;ANAPC7.S;ANAPC7	ANAPC7	ANAPC7	ANAPHASE-PROMOTING COMPLEX SUBUNIT 7-LIKE	ANAPC7	APC7_HUMAN;ANAPC7	ANAPHASE-PROMOTING COMPLEX SUBUNIT 7;ANAPC7	APC7_MOUSE;ANAPC7	ANAPHASE-PROMOTING COMPLEX SUBUNIT 7
2890	PORTHOMCL2890[AjBfCgCiDrGgLvMmOjOlPsSpXl|(18 genes, 13 taxa)]:	-0.703516	-0.875736	-0.639615	0.421275	0.0518873	0.686529	-0.877416	0.117133	-0.863735	-0.776883	-0.759436	-0.800018	UHRF1	UHRF2	UHRF1	LOC108711828;UHRF1.S;UHRF1	UHRF1	UHRF1	UHRF2 PROTEIN;UHRF1		UHRF1_XENTR;UHRF1_XENLA;UHRF1	PUTATIVE E3 UBIQUITIN-PROTEIN LIGASE UHRF1-LIKE ISOFORM X2;PUTATIVE E3 UBIQUITIN-PROTEIN LIGASE UHRF1	UHRF1_XENTR;UHRF1_XENLA;UHRF1	E3 UBIQUITIN-PROTEIN LIGASE UHRF1
11111	PORTHOMCL11111[AjCgLvOjSp|(7 genes, 5 taxa)]:	0	0	0	0	0	0	0	0	-0.853689	-0.731018	-0.815182	-0.799963									NANO1_DANRE	HYPOTHETICAL PROTEIN	NANO2_MOUSE	NANOS 2
2534	PORTHOMCL2534[AjBfCgCiDrGgLvMmOjOlPsSpXl|(19 genes, 13 taxa)]:	0.334176	-0.714637	0.0509341	0.0476716	-0.124926	0.839912	-0.85861	-0.44442	-0.911912	-0.813845	-0.672059	-0.799272	PTDSS1	PTDSS1	PTDSS1	PTDSS1.S;LOC108719355;PTDSS1	PTDSS1A;PTDSS1B;PTDSS1	PTDSS1A;SI:DKEY-108K24.2;PTDSS1B;PTDSS1	PHOSPHATIDYLSERINE SYNTHASE 1-LIKE;PHOSPHATIDYLSERINE SYNTHASE 1-LIKE, TRANSCRIPT VARIANT X1; PHOSPHATIDYLSERINE SYNTHASE 1-LIKE, TRANSCRIPT VARIANT X2; PHOSPHATIDYLSERINE SYNTHASE 1-LIKE, TRANSCRIPT VARIANT X3;PTDSS1	PTDSS1	PTSS1_DANRE;PTDSS1	PUTATIVE PHOSPHATIDYLSERINE SYNTHASE 1	PTSS1_DANRE	PHOSPHATIDYLSERINE SYNTHASE 1;PTDSS1
5790	PORTHOMCL5790[AjBfCgCiDrGgLvMmOjOlPsSpXl|(14 genes, 13 taxa)]:	-0.695879	-0.675297	-0.578791	0.405833	-0.618431	0.623588	-0.868351	-0.46021	-0.880118	-0.811373	-0.704167	-0.798552	MCM4	MCM7	MCM7	MCM7.S;MCM7	MCM7	MCM7	DNA REPLICATION LICENSING FACTOR MCM7-B;MCM7	MCM7	MCM7A_XENLA;MCM7	MINICHROMOSOME MAINTENANCE 7;MCM7	MCM7A_XENLA;MCM7	DNA REPLICATION LICENSING FACTOR MCM7-A, TRANSCRIPT VARIANT X2; DNA REPLICATION LICENSING FACTOR MCM7-A, TRANSCRIPT VARIANT X1;MCM7
6622	PORTHOMCL6622[AjBfCgCiDrGgLvMmOjOlPsSpXl|(13 genes, 13 taxa)]:	-0.640275	-0.945011	-0.577143	-0.836716	-0.785172	-0.208294	-0.876636	-0.859388	-0.860588	-0.785635	-0.748529	-0.798251		ZWILCH	ZWILCH	ZWILCH.S;ZWILCH	ZWILCH	ZWILCH	PROTEIN ZWILCH HOMOLOG		ZWILC_XENLA	HYPOTHETICAL PROTEIN	ZWILC_XENTR	PROTEIN ZWILCH HOMOLOG
685	PORTHOMCL685[AjBfCgCiDrGgLvMmOjOlPsSpXl|(35 genes, 13 taxa)]:	-0.403242	-0.170692	0	0.530226	0.262132	0.722134	-0.786	0.711329	-0.8715	-0.762848	-0.756373	-0.796907	PIWIL1	PIWIL2;PIWIL4;PIWIL1	PIWIL2;PIWIL1;PIWIL4	PIWIL2.L;PIWIL3.L;PIWIL2	PIWIL2;PIWIL1	PIWIL2;PIWIL1	PIWI-LIKE PROTEIN 2, TRANSCRIPT VARIANT X1; PIWI-LIKE PROTEIN 2, TRANSCRIPT VARIANT X2; PIWI-LIKE PROTEIN 2, TRANSCRIPT VARIANT X3;PIWI-LIKE PROTEIN 1, TRANSCRIPT VARIANT X3; PIWI-LIKE PROTEIN 1, TRANSCRIPT VARIANT X2; PIWI-LIKE PROTEIN 1, TRANSCRIPT VARIANT X1;PIWIL1	PIWIL1	PIWL2_DANRE;PIWL1_HUMAN	PUTATIVE SEALI;PIWI-LIKE PROTEIN 1;HYPOTHETICAL PROTEIN;PIWIL1	PIWL2_HUMAN;PIWL1_MOUSE;PIWIL1	SEAWI
132	PORTHOMCL132[AjBfCgCiDrGgLvMmOjOlPsSpXl|(92 genes, 13 taxa)]:	-0.496208	-0.76967	-0.609341	-0.174167	-0.107647	0.201265	-0.916039	-0.133636	-0.903059	-0.810196	-0.677223	-0.796826	G2E3;PHF7	G2E3	G2E3;PHF7	G2E3.L	G2E3;G2/M PHASE-SPECIFIC E3 UBIQUITIN-PROTEIN LIGASE-LIKE	G2E3	PHD FINGER PROTEIN 7, TRANSCRIPT VARIANT X1; PHD FINGER PROTEIN 7, TRANSCRIPT VARIANT X2		G2E3_CHICK	PUTATIVE GPI-ANCHORED ADHESIN-LIKE PROTEIN PGA55-LIKE	G2E3_MOUSE	G2/M PHASE-SPECIFIC E3 UBIQUITIN-PROTEIN LIGASE
1893	PORTHOMCL1893[AjBfCgCiDrGgLvMmOjOlPsSpXl|(22 genes, 13 taxa)]:	-0.437198	-0.74844	-0.815989	-0.47549	0.215564	0.222353	-0.865351	0.835734	-0.872265	-0.795335	-0.719975	-0.795859	RPS6KB1	RPS6KB1;RPS6KB2	RPS6KB1;RPS6KB2	RPS6KB1.S;RPS6KB1.L;RPS6KB1	RPS6KB1B;RPS6KB1A;RPS6KB2;RPS6KB1	RPS6KB1B;RPS6KB1A	RIBOSOMAL PROTEIN S6 KINASE BETA-2-LIKE	RPS6KB1	KS6B2_HUMAN	PUTATIVE RIBOSOMAL PROTEIN S6 KINASE BETA-1;RPS6KB1	KS6B1_RABIT;RPS6KB2	RIBOSOMAL PROTEIN S6 KINASE BETA-1;RPS6KB2
8091	PORTHOMCL8091[AjCiDrGgLvMmOjOlSpXl|(11 genes, 10 taxa)]:	-0.255934	0	-0.525714	-0.286397	-0.467132	0.537029	-0.782403	0	-0.873882	-0.78644	-0.726471	-0.795598	NHP2		NHP2	NHP2.S;NHP2.L;NHP2	NHP2	NHP2	H/ACA RIBONUCLEOPROTEIN COMPLEX SUBUNIT 2-LIKE PROTEIN;NHP2		NHP2_MOUSE;NHP2	PUTATIVE H/ACA RIBONUCLEOPROTEIN COMPLEX SUBUNIT 2-LIKE PROTEIN	NHP2_BOVIN;NHP2	H/ACA RIBONUCLEOPROTEIN COMPLEX SUBUNIT 2-LIKE PROTEIN;NHP2
3009	PORTHOMCL3009[AjBfCgDrGgLvMmOjOlPsSpXl|(18 genes, 12 taxa)]:	0.0452198	0.168264	0.473187	0.195466	-0.312059	0.591647	0	0.090979	-0.831176	-0.833681	-0.71826	-0.794373	ENTPD4;ENTPD7	ENTPD4;ENTPD7	GM21685;ENTPD4;ENTPD7	ENTPD4.L;ENTPD7.L;ENTPD7	ENTPD4;ENTPD7	ENTPD4			ENTP4_MOUSE;ENTPD4	PUTATIVE ECTONUCLEOSIDE TRIPHOSPHATE DIPHOSPHOHYDROLASE 4 ISOFORM X1;ENTPD7	ENTP7_MOUSE	ECTONUCLEOSIDE TRIPHOSPHATE DIPHOSPHOHYDROLASE 4, TRANSCRIPT VARIANT X2; ECTONUCLEOSIDE TRIPHOSPHATE DIPHOSPHOHYDROLASE 4, TRANSCRIPT VARIANT X1;ENTPD4
1811	PORTHOMCL1811[AjBfCgCiDrGgLvMmOjOlPsSpXl|(22 genes, 13 taxa)]:	-0.416813	-0.808923	-0.542033	-0.299828	-0.213309	0.132941	-0.339636	0.147483	-0.911176	-0.883922	-0.586448	-0.793849	UTP20	UTP20	UTP20	LOC108711014;UTP20	UTP20	UTP20	SMALL SUBUNIT PROCESSOME COMPONENT 20 HOMOLOG, TRANSCRIPT VARIANT X2; SMALL SUBUNIT PROCESSOME COMPONENT 20 HOMOLOG, TRANSCRIPT VARIANT X1		UTP20_HUMAN;UTP20	PUTATIVE SMALL SUBUNIT PROCESSOME COMPONENT 20-LIKE;PUTATIVE SMALL SUBUNIT PROCESSOME COMPONENT 20-LIKE ISOFORM X3	UTP20_HUMAN;UTP20_MOUSE	SMALL SUBUNIT PROCESSOME COMPONENT 20 HOMOLOG;SMALL SUBUNIT PROCESSOME COMPONENT 20 HOMOLOG, TRANSCRIPT VARIANT X1; SMALL SUBUNIT PROCESSOME COMPONENT 20 HOMOLOG, TRANSCRIPT VARIANT X2; SMALL SUBUNIT PROCESSOME COMPONENT 20 HOMOLOG, TRANSCRIPT VARIANT X3
4619	PORTHOMCL4619[AjBfCgCiDrGgLvMmOjOlPsSpXl|(15 genes, 13 taxa)]:	-0.623132	-0.796747	-0.643846	0.243701	0.113824	-0.584706	-0.884623	-0.392657	-0.813412	-0.821032	-0.746936	-0.793793	CEP76	CEP76	CEP76	CEP76.L;CEP76	CEP76	CEP76	CENTROSOMAL PROTEIN OF 76 KDA-LIKE;CEP76	CEP76	CEP76_XENTR;CEP76	PUTATIVE CENTROSOMAL PROTEIN;CEP76	CEP76_MOUSE;CEP76	CENTROSOMAL PROTEIN OF 76 KDA, TRANSCRIPT VARIANT X1;CEP76
2021	PORTHOMCL2021[AjBfCgCiDrGgLvMmOjOlPsSpXl|(21 genes, 13 taxa)]:	-0.388242	-0.931341	-0.858901	-0.116912	-0.595245	0.130676	-0.886273	-0.544274	-0.886029	-0.69129	-0.803554	-0.793624	EZH2;EZH1	EZH2	EZH2	EZH2.L;EZH1.L;LOC108702719;EZH2.S;EZH1;EZH2	EZH1;EZH2	EZH2;EZH1	HISTONE-LYSINE N-METHYLTRANSFERASE EZH2;EZH2	EZH2	EZH2_HUMAN	PUTATIVE HISTONE-LYSINE N-METHYLTRANSFERASE EZH2;PUTATIVE HISTONE-LYSINE N-METHYLTRANSFERASE EZH2 ISOFORM X3	EZH2_MACFA	HISTONE-LYSINE N-METHYLTRANSFERASE EZH2;HISTONE-LYSINE N-METHYLTRANSFERASE EZH2-LIKE;EZH2
4042	PORTHOMCL4042[AjBfCgCiDrGgLvMmOjOlPsSpXl|(16 genes, 13 taxa)]:	-0.720549	-0.74778	-0.629341	0.380441	0.115662	0.694676	-0.89961	0.741189	-0.894853	-0.765387	-0.718184	-0.792808	EXO1	EXO1	EXO1	EXO1.S;EXO1	EXO1	EXO1	EXONUCLEASE 1-LIKE;EXO1		EXO1_DANRE;EXO1	PUTATIVE EXONUCLEASE 1 ISOFORM X1;EXO1	EXO1_DANRE	EXONUCLEASE 1, TRANSCRIPT VARIANT X3; EXONUCLEASE 1, TRANSCRIPT VARIANT X2; EXONUCLEASE 1, TRANSCRIPT VARIANT X1;EXO1
3760	PORTHOMCL3760[AjCgCiDrGgLvMmOjOlPsSpXl|(16 genes, 12 taxa)]:	-0.461319	-0.49789	-0.55044	0.362206	0.0882353	0.713824	-0.79974	0	-0.826794	-0.818204	-0.733333	-0.792777	PPM1G	PPM1G	PPM1G	PPM1G.S;PPM1G.L;PPM1G	PPM1G	PPM1G	PROTEIN PHOSPHATASE 1G-LIKE;PPM1G		PPM1G_MOUSE	HYPOTHETICAL PROTEIN	PPM1G_MACFA;PP2C2_CAEEL	PROTEIN PHOSPHATASE 1G;PPM1G
3201	PORTHOMCL3201[AjBfCgCiDrGgLvMmOjOlPsSpXl|(17 genes, 13 taxa)]:	-0.438571	-0.790945	-0.590495	-0.173529	0.0134069	0.698824	-0.788117	0.559225	-0.897471	-0.810671	-0.669363	-0.792501	RIF1	RIF1	RIF1	RIF1.S;RIF1		RIF1	TELOMERE-ASSOCIATED PROTEIN RIF1-LIKE, TRANSCRIPT VARIANT X1; TELOMERE-ASSOCIATED PROTEIN RIF1-LIKE, TRANSCRIPT VARIANT X2		RIF1_HUMAN;RIF1_MOUSE	PUTATIVE TELOMERE-ASSOCIATED PROTEIN RIF1-LIKE	RIF1_HUMAN	TELOMERE-ASSOCIATED PROTEIN RIF1;TELOMERE-ASSOCIATED PROTEIN RIF1-LIKE
2992	PORTHOMCL2992[AjBfCgCiDrGgLvMmOjOlPsSpXl|(18 genes, 13 taxa)]:	0.287857	-0.198242	0.791209	-0.26723	-0.0654902	0.256176	-0.311636	0.225455	-0.8085	-0.849391	-0.718015	-0.791969	YIF1B	YIF1A;YIF1B	YIF1B;YIF1A	YIF1B.S;YIF1B.L;YIF1B	YIF1A	YIF1B;YIF1A	PROTEIN YIF1B-LIKE;YIF1B	YIF1B	YF1BA_XENLA;YIF1B	HYPOTHETICAL PROTEIN;YIF1B	YIF1B_DANRE;YIF1B	PROTEIN YIF1B-A, TRANSCRIPT VARIANT X1; PROTEIN YIF1B-A, TRANSCRIPT VARIANT X2;YIF1B
4333	PORTHOMCL4333[BfCiDrGgLvMmOjOlPsSpXl|(15 genes, 11 taxa)]:	-0.758077	-0.861538	-0.728077	0.378113	-0.82924	-0.585	-0.0174018	0.67986	-0.866059	-0.765304	-0.744118	-0.791827	DEPDC1B;DEPDC1	DEPDC1B	DEPDC1B	DEPDC1B.L;MGC130877;LOC108704432;DEPDC1B	DEP DOMAIN CONTAINING 1B;DEPDC1B	DEPDC1B	DEP DOMAIN-CONTAINING PROTEIN 1A-LIKE		DEP1B_CHICK;DEPDC1		DEP1B_MOUSE;DEPDC1B	DEP DOMAIN-CONTAINING PROTEIN 1A
1981	PORTHOMCL1981[AjBfCgCiDrGgLvMmOjOlPsSpXl|(21 genes, 13 taxa)]:	-0.589231	-0.835165	-0.575495	-0.198652	-0.593578	0.0180882	-0.840156	0.796643	-0.891441	-0.866625	-0.617034	-0.7917	RANBP1	RANBP1	RANBP1	RANBP1.S;RANBP1.L;RANBP1	RANBP1	RANBP1	RAN-SPECIFIC GTPASE-ACTIVATING PROTEIN-LIKE, TRANSCRIPT VARIANT X1; RAN-SPECIFIC GTPASE-ACTIVATING PROTEIN-LIKE, TRANSCRIPT VARIANT X2; RAN-SPECIFIC GTPASE-ACTIVATING PROTEIN-LIKE, TRANSCRIPT VARIANT X3;RANBP1	RANBP1	RANG_HUMAN	PUTATIVE RAN-SPECIFIC GTPASE-ACTIVATING PROTEIN ISOFORM X2;RAN GTPASE BINDING PROTEIN SBP1;PUTATIVE E3 SUMO-PROTEIN LIGASE RANBP2;RANBP1	RANG_HUMAN	RAN-SPECIFIC GTPASE-ACTIVATING PROTEIN, TRANSCRIPT VARIANT X2; RAN-SPECIFIC GTPASE-ACTIVATING PROTEIN, TRANSCRIPT VARIANT X1
3305	PORTHOMCL3305[AjBfCgCiDrGgLvMmOjOlPsSpXl|(17 genes, 13 taxa)]:	-0.434066	-0.703385	-0.536154	0.292157	0.135931	0.698647	-0.779636	-0.141756	-0.893235	-0.66452	-0.815319	-0.791025	EXOSC10	EXOSC10	EXOSC10	EXOSC10.L;EXOSC10	EXOSC10	EXOSC10	EXOSOME COMPONENT 10-LIKE;EXOSOME COMPONENT 10-LIKE, TRANSCRIPT VARIANT X3; EXOSOME COMPONENT 10-LIKE, TRANSCRIPT VARIANT X1; EXOSOME COMPONENT 10-LIKE, TRANSCRIPT VARIANT X2	EXOSC10	EXOSX_HUMAN;EXOSC10	PUTATIVE EXOSOME COMPONENT 10	EXOSX_HUMAN;EXOSC10	EXOSOME COMPONENT 10;EXOSC10
2067	PORTHOMCL2067[AjBfCgCiDrGgLvMmOjOlPsSpXl|(21 genes, 13 taxa)]:	-0.492912	-0.798769	-0.547637	-0.649559	-0.750417	-0.526412	-0.831195	0.781958	-0.894647	-0.790588	-0.687255	-0.79083	RANGAP1	RANGAP1	RANGAP1	RANGAP1.L;LOC108701885;RANGAP1.S;RANGAP1	RANGAP1B;RANGAP1A;RANGAP1	RANGAP1A;RANGAP1B	RAN GTPASE-ACTIVATING PROTEIN 1-LIKE;RANGAP1			PUTATIVE RAN GTPASE-ACTIVATING PROTEIN 1	RAGP1_XENLA;RANGAP1	GTPASE ACTIVATING PROTEIN RANGAP1;RAN GTPASE-ACTIVATING PROTEIN 1
4195	PORTHOMCL4195[AjCgCiDrGgLvMmOjOlPsSpXl|(16 genes, 12 taxa)]:	-0.454615	-0.637011	-0.559451	0.46049	0.177059	0.722235	-0.927091	0	-0.8895	-0.760433	-0.719118	-0.789684	CCNB2	CCNB2	CCNB2	CCNB2.L;CCNB1.2.L;CCNB2.S;CCNB2	CCNB2	CCNB2	G2/MITOTIC-SPECIFIC CYCLIN-B2-LIKE;CCNB2		CCNB_MARGL	CYCLIN B	CCNB_ARBPU	CYCLIN B;G2/MITOTIC-SPECIFIC CYCLIN-B;CCNB1
2623	PORTHOMCL2623[AjBfCgCiDrGgLvMmOjOlPsSpXl|(19 genes, 13 taxa)]:	-0.759945	-0.750462	-0.644725	0.375049	-0.166348	0.699588	-0.785974	-0.796175	-0.872206	-0.796078	-0.699265	-0.789183	SUV39H2;SUV39H1	SUV39H2;SUV39H1	SUV39H2;SUV39H1	LOC108713053;SUV39H2.L;SUV39H1.L;SUV39H2	SUV39H1A;SUV39H1	SUV39H1B;SUV39H1A;SUV39H1	HISTONE-LYSINE N-METHYLTRANSFERASE SUV39H2	SUV39H2	SUV92_MOUSE;SUV39H2	PUTATIVE HISTONE-LYSINE N-METHYLTRANSFERASE SUV39H2;SUV39H2	SUV91_PONAB;SUV39H2	HISTONE-LYSINE N-METHYLTRANSFERASE SUV39H2;SUV39H2
7150	PORTHOMCL7150[AjBfCgCiDrLvMmOjOlPsSpXl|(12 genes, 12 taxa)]:	0	0.269407	0.408352	0.0845389	0.0189461	0.0879706	-0.935104	-0.641322	-0.788647	-0.888648	-0.688848	-0.788714		MBD2	MBD2	MBD2.L	MBD2	MBD2	METHYL-CPG-BINDING DOMAIN PROTEIN 2-LIKE	MBD2	MBD2_HUMAN	METHYL-CPG-BINDING DOMAIN PROTEIN 2/3;MBD2	MBD2_MOUSE	METHYL-CPG-BINDING DOMAIN PROTEIN 2, TRANSCRIPT VARIANT X1; METHYL-CPG-BINDING DOMAIN PROTEIN 2, TRANSCRIPT VARIANT X2;MBD2
3344	PORTHOMCL3344[AjBfCgCiDrGgLvMmOjOlPsSpXl|(17 genes, 13 taxa)]:	-0.377747	-0.592527	-0.566978	0.419877	-0.13951	0.727941	-0.778857	0.490629	-0.892735	-0.756656	-0.716667	-0.788686	RCC1	RCC1	RCC1	RCC1.S;RCC1.L	RCC1	RCC1	REGULATOR OF CHROMOSOME CONDENSATION 1	SEMA3D	RCC1_HUMAN;SEMA3D	PUTATIVE REGULATOR OF CHROMOSOME CONDENSATION	RCC1_MESAU	REGULATOR OF CHROMOSOME CONDENSATION
5772	PORTHOMCL5772[AjBfCgCiDrGgLvMmOjOlPsSpXl|(14 genes, 13 taxa)]:	-0.45478	-0.697275	-0.564505	0.292059	-0.638431	0.289912	0.189195	0.402587	-0.809	-0.778617	-0.776838	-0.788152	SEH1L	SEH1L	SEH1L	MGC82845;SEH1L.L;SEH1L	SEH1L	SEH1L	NUCLEOPORIN SEH1-LIKE;SEH1L	SEH1L	SEH1A_XENLA;SEH1L	HYPOTHETICAL PROTEIN;SEH1L	SEH1_BOVIN	NUCLEOPORIN SEH1, TRANSCRIPT VARIANT X2; NUCLEOPORIN SEH1, TRANSCRIPT VARIANT X1;SEH1L
5575	PORTHOMCL5575[AjBfCgCiDrGgLvMmOjOlPsSpXl|(14 genes, 13 taxa)]:	-0.343242	-0.233099	-0.682747	0.417279	-0.317843	0.7725	0.553351	-0.587879	-0.887941	-0.77676	-0.695956	-0.786886	TRPC4AP	TRPC4AP	TRPC4AP	TRPC4AP.L;TRPC4AP	TRPC4APA	TRPC4APA;TRPC4APB	SHORT TRANSIENT RECEPTOR POTENTIAL CHANNEL 4-ASSOCIATED PROTEIN-LIKE;LOC100176203		TP4AP_HUMAN;TRPC4AP	PUTATIVE SHORT TRANSIENT RECEPTOR POTENTIAL CHANNEL 4-ASSOCIATED PROTEIN ISOFORM X2	TP4AP_MOUSE;TRPC4AP	SHORT TRANSIENT RECEPTOR POTENTIAL CHANNEL 4-ASSOCIATED PROTEIN, TRANSCRIPT VARIANT X1; SHORT TRANSIENT RECEPTOR POTENTIAL CHANNEL 4-ASSOCIATED PROTEIN, TRANSCRIPT VARIANT X2;TRPC4AP
4990	PORTHOMCL4990[AjBfCgCiDrGgLvMmOjOlPsSpXl|(15 genes, 13 taxa)]:	-0.492253	-0.664308	-0.558242	0.17652	0.058799	0.0453235	-0.812039	-0.827084	-0.918647	-0.711558	-0.728922	-0.786376	MPHOSPH10	MPHOSPH10	MPHOSPH10	MPHOSPH10.L;MPHOSPH10	MPHOSPH10	MPHOSPH10	U3 SMALL NUCLEOLAR RIBONUCLEOPROTEIN PROTEIN MPP10-LIKE	MPHOSPH10	MPP10_MOUSE	PUTATIVE U3 SMALL NUCLEOLAR RIBONUCLEOPROTEIN MPP10-LIKE	MPP10_HUMAN	U3 SMALL NUCLEOLAR RIBONUCLEOPROTEIN PROTEIN MPP10;MPHOSPH10
3708	PORTHOMCL3708[AjBfCgCiDrGgLvMmOjOlPsSpXl|(16 genes, 13 taxa)]:	-0.548571	-0.724923	-0.818846	0.30451	-0.457868	-0.204588	0.469961	-0.753828	-0.888382	-0.944149	-0.526593	-0.786375	QKI	QKI	QK;QKI	QKI.L;QKI	QKIA;QKI2;QKI	QKIA;QKI2;QKIB;QKI	PROTEIN QUAKING-B, TRANSCRIPT VARIANT X2; PROTEIN QUAKING-B, TRANSCRIPT VARIANT X1; PROTEIN QUAKING-B, TRANSCRIPT VARIANT X3; PROTEIN QUAKING-B, TRANSCRIPT VARIANT X4; PROTEIN QUAKING-B, TRANSCRIPT VARIANT X5;HOW	QKI		HYPOTHETICAL PROTEIN	QKIA_XENLA	PROTEIN QUAKING-A, TRANSCRIPT VARIANT X4; PROTEIN QUAKING-A, TRANSCRIPT VARIANT X2; PROTEIN QUAKING-A, TRANSCRIPT VARIANT X1; PROTEIN QUAKING-A, TRANSCRIPT VARIANT X3
3586	PORTHOMCL3586[AjCgCiDrGgLvMmOjOlPsSpXl|(17 genes, 12 taxa)]:	-0.606703	-0.822286	-0.574725	0.309877	0.0932598	0.722382	-0.912091	0	-0.862941	-0.756718	-0.737623	-0.785761	KIF23	KIF23	KIF23	KIF23.L;KIF23.S;KIF23	KIF23 (1 OF MANY)	KIF23	KINESIN-LIKE PROTEIN KIF23, TRANSCRIPT VARIANT X2; KINESIN-LIKE PROTEIN KIF23, TRANSCRIPT VARIANT X1		KIF23_HUMAN	HYPOTHETICAL PROTEIN	KIF23_HUMAN	KRP110;KINESIN-LIKE PROTEIN KIF23
3787	PORTHOMCL3787[AjBfCgCiDrGgLvMmOjOlPsSpXl|(16 genes, 13 taxa)]:	0.119011	-0.414725	-0.556758	-0.574608	0.49902	-0.510941	-0.754753	0.748392	-0.876265	-0.893127	-0.5875	-0.785631	FAM91A1	FAM91A1	FAM91A1	FAM91A1.L;LOC108695438	FAM91A1	FAM91A1	PROTEIN FAM91A1-LIKE		F91A1_MOUSE	HYPOTHETICAL PROTEIN;FAMILY WITH SEQUENCE SIMILARITY 91, MEMBER A1	F91A1_MOUSE	PROTEIN FAM91A1, TRANSCRIPT VARIANT X2; PROTEIN FAM91A1, TRANSCRIPT VARIANT X1
2382	PORTHOMCL2382[AjBfCgCiDrGgLvMmOjOlSpXl|(20 genes, 12 taxa)]:	-0.472527	0	-0.566099	0.0913725	-0.259828	0.304559	-0.816779	-0.585369	-0.840706	-0.875212	-0.640196	-0.785371	SNRPD1		SNRPD1	SNRPD1.L;SNRPD1.S;SNRPD1	SNRPD1	SNRPD1	SMALL NUCLEAR RIBONUCLEOPROTEIN SM D1-LIKE;SNRPD1	SNRPD1	SMD1_DROME;SMD1_MOUSE;SNRPD1	HYPOTHETICAL PROTEIN;SNRPD1	SMD1_MOUSE;SNRPD1	SMALL NUCLEAR RIBONUCLEOPROTEIN SM D1;SNRPD1
2941	PORTHOMCL2941[AjBfCgCiDrGgLvMmOjOlPsSpXl|(18 genes, 13 taxa)]:	-0.294396	-0.71156	-0.415824	-0.841471	-0.547977	-0.591971	-0.696416	-0.724336	-0.762412	-0.864045	-0.729412	-0.78529	MARS2	MARS2	MARS2	MARS2.L;MARS2	MARS2	MARS2	METHIONINE--TRNA LIGASE, MITOCHONDRIAL-LIKE;MARS2	MARS2	SYMM_TAKRU;SYMC_XENLA;SYMM_HUMAN	HYPOTHETICAL PROTEIN;MARS2	SYMM_TAKRU;MARS2	METHIONINE--TRNA LIGASE, MITOCHONDRIAL
2024	PORTHOMCL2024[AjBfCgCiDrGgLvMmOjOlPsSpXl|(21 genes, 13 taxa)]:	-0.510055	-0.840703	-0.866484	0.342402	-0.00990196	0.466588	-0.858182	-0.0793929	-0.836118	-0.753148	-0.765931	-0.785066	RACGAP1	RACGAP1	RACGAP1	RACGAP1.L;RACGAP1.S;RACGAP1.2.L;RACGAP1	RACGAP1;RAC GTPASE-ACTIVATING PROTEIN 1;SI:CH1073-416J23.1	RACGAP1;SI:CH1073-416J23.1	RAC GTPASE-ACTIVATING PROTEIN 1-LIKE	RACGAP1	RGAP1_HUMAN;RACGAP1	PUTATIVE RAC GTPASE-ACTIVATING PROTEIN 1 ISOFORM X3	RGAP1_HUMAN	RAC GTPASE-ACTIVATING PROTEIN 1, TRANSCRIPT VARIANT X5; RAC GTPASE-ACTIVATING PROTEIN 1, TRANSCRIPT VARIANT X4; RAC GTPASE-ACTIVATING PROTEIN 1, TRANSCRIPT VARIANT X3; RAC GTPASE-ACTIVATING PROTEIN 1, TRANSCRIPT VARIANT X2; RAC GTPASE-ACTIVATING PROTEIN 1, TRANSCRIPT VARIANT X1;RACGAP1
11999	PORTHOMCL11999[AjBfLvOjSpXl|(6 genes, 6 taxa)]:	0	0	0	-0.578309	0	0	0	0.76979	-0.861647	-0.792487	-0.699877	-0.784671				TMEM214.L;TMEM214					T214B_XENLA	PUTATIVE TRANSMEMBRANE PROTEIN	T214A_XENLA	TRANSMEMBRANE PROTEIN 214-A
1421	PORTHOMCL1421[AjBfCgCiDrGgLvMmOjOlPsSpXl|(25 genes, 13 taxa)]:	-0.426923	-0.93011	-0.599725	-0.827525	-0.114191	0.149794	-0.662052	0.198529	-0.882824	-0.766581	-0.702206	-0.78387	RTEL1	RTEL1	RTEL1	LOC108700952;RTEL1	BRIP1	RTEL1	REGULATOR OF TELOMERE ELONGATION HELICASE 1, TRANSCRIPT VARIANT X2; REGULATOR OF TELOMERE ELONGATION HELICASE 1, TRANSCRIPT VARIANT X1; REGULATOR OF TELOMERE ELONGATION HELICASE 1, TRANSCRIPT VARIANT X3;RTEL1	RTEL1	FANCJ_HUMAN;ERCC2_HUMAN;DDX11_MOUSE;ERCC2	HYPOTHETICAL PROTEIN;PUTATIVE FANCONI ANEMIA GROUP J PROTEIN-LIKE;PUTATIVE REGULATOR OF TELOMERE ELONGATION HELICASE 1;RTEL1;ERCC2;BRIP1	RTEL1_DANRE;RTEL1	REGULATOR OF TELOMERE ELONGATION HELICASE 1;REGULATOR OF TELOMERE ELONGATION HELICASE 1-LIKE;RTEL1
3497	PORTHOMCL3497[AjBfCgCiDrGgLvMmOjOlPsSp|(17 genes, 12 taxa)]:	-0.0475824	-0.183341	-0.550165	0	0.130196	0.529794	-0.897195	-0.566364	-0.804588	-0.773457	-0.773529	-0.783858	TNPO3	TNPO3	TNPO3		TNPO3	TNPO3	TRANSPORTIN-3-LIKE;TNPO3	TNPO3	TNPO3_MOUSE;TNPO3	TRANSPORTIN-3;PUTATIVE C-JUN-AMINO-TERMINAL KINASE-INTERACTING PROTEIN 1;TNPO3	TNPO3_MOUSE	TRANSPORTIN-3
3044	PORTHOMCL3044[AjBfCgCiDrGgLvMmOjOlPsSpXl|(18 genes, 13 taxa)]:	-0.459231	-0.536264	-0.553352	-0.628701	0.12299	-0.0684178	-0.604896	-0.826447	-0.8875	-0.866522	-0.596569	-0.78353	ABCF2	ABCF2	ABCF2	LOC108695527;ABCF2.L;ABCF2	ABCF2A	ABCF2 (1 OF MANY);ABCF2	ATP-BINDING CASSETTE SUB-FAMILY F MEMBER 2, TRANSCRIPT VARIANT X1; ATP-BINDING CASSETTE SUB-FAMILY F MEMBER 2, TRANSCRIPT VARIANT X2;ATP-BINDING CASSETTE SUB-FAMILY F MEMBER 3;ABCF3	ABCF3	ABCF2_MOUSE;ABCF2	PUTATIVE ATP-BINDING CASSETTE SUB-FAMILY F MEMBER 2;PUTATIVE ATP-BINDING CASSETTE SUB-FAMILY F MEMBER 1;ABCF1;ABCF2	ABCF2_HUMAN;ABCF2	ATP-BINDING CASSETTE SUB-FAMILY F MEMBER 2;ABCF2
4191	PORTHOMCL4191[AjBfCgCiDrGgLvMmOjOlPsSpXl|(16 genes, 13 taxa)]:	-0.392747	-0.788176	-0.560659	-0.154069	-0.617745	-0.180178	-0.913766	0.105175	-0.886441	-0.760495	-0.703064	-0.783333	RAD51A;RAD51	RAD51	RAD51	RAD51.L	RAD51	RAD51	DNA REPAIR PROTEIN RAD51 HOMOLOG 1-LIKE;RAD51	RAD51	RA51B_XENLA	PUTATIVE DNA REPAIR PROTEIN;RAD51	RAD51_CRIGR;RA51A_XENLA	DNA REPAIR PROTEIN RAD51 HOMOLOG 1, TRANSCRIPT VARIANT X1;RAD51
11940	PORTHOMCL11940[AjBfCgLvOjSp|(6 genes, 6 taxa)]:	0	0	0	0	0	0	0	0.356364	-0.768	-0.800124	-0.781495	-0.783206									AUG2_ARATH	HYPOTHETICAL PROTEIN	AUG2_ARATH	UNCHARACTERIZED LOC582814
9335	PORTHOMCL9335[AjCgLvOjPsSp|(9 genes, 6 taxa)]:	0	-0.749582	0	0	0	0	0	0	-0.842471	-0.828091	-0.678799	-0.78312		CLSPN							CLSPN_MOUSE	PUTATIVE CLASPIN	CLSPN_HUMAN	CLASPIN
2478	PORTHOMCL2478[AjBfCgCiDrGgLvMmOjOlPsSpXl|(19 genes, 13 taxa)]:	-0.458791	-0.749011	-0.496648	-0.45973	-0.237574	-0.374941	-0.798026	0.288322	-0.833735	-0.783674	-0.731863	-0.783091	NLE1	NLE1;TBL1X	NLE1	NLE1.S;NLE1	NLE1	NLE1	NOTCHLESS PROTEIN HOMOLOG 1;NLE1		NLE1_XENLA;NLE1	HYPOTHETICAL PROTEIN;PUTATIVE NOTCHLESS PROTEIN-LIKE 1-LIKE;NLE1	NLE1_BOVIN;NLE1_MOUSE	NOTCHLESS PROTEIN HOMOLOG 1;NOTCHLESS PROTEIN HOMOLOG 1-LIKE;NLE1
3804	PORTHOMCL3804[AjBfCgDrGgLvMmOjOlPsSpXl|(16 genes, 12 taxa)]:	-0.26011	-0.844088	0.156374	0.0970588	0.383995	0.685647	0	-0.396448	-0.861059	-0.852611	-0.634926	-0.782865	UGDH	UGDH	UGDH	UGDH.2.L;UGDH.S;UGDH	UGDH	UGDH		UGDH	UGDH_DROME;UGDH	PUTATIVE UDP-GLUCOSE 6-DEHYDROGENASE ISOFORM X2;PUTATIVE UDP-GLUCOSE 6-DEHYDROGENASE ISOFORM X3;UGDH	UGDH_MOUSE;UGDH	UDP-GLUCOSE 6-DEHYDROGENASE, TRANSCRIPT VARIANT X3; UDP-GLUCOSE 6-DEHYDROGENASE, TRANSCRIPT VARIANT X1; UDP-GLUCOSE 6-DEHYDROGENASE, TRANSCRIPT VARIANT X2;UGDH
4600	PORTHOMCL4600[AjBfCgCiDrGgLvMmOjOlPsSpXl|(15 genes, 13 taxa)]:	0.123242	-0.506901	-0.474835	-0.612132	0.0271569	0.602882	-0.46539	-0.537503	-0.787853	-0.743756	-0.816054	-0.782554	HM13	HM13	H13;HM13	HM13.S;HM13.L;HM13	HM13	HM13	PRESENILIN-LIKE PROTEIN 3, TRANSCRIPT VARIANT X1; PRESENILIN-LIKE PROTEIN 3;HM13	HM13	C2D2A_HUMAN	H13-PROV PROTEIN	HM13_HUMAN;HM13	MINOR HISTOCOMPATIBILITY ANTIGEN H13;MINOR HISTOCOMPATIBILITY ANTIGEN H13-LIKE;HM13
6494	PORTHOMCL6494[AjBfDrGgLvMmOjOlPsSpXl|(13 genes, 11 taxa)]:	-0.655934	-0.728703	-0.63	0.381629	-0.0121324	0.567206	0	0.265106	-0.871706	-0.758947	-0.716667	-0.78244	RAD18	RAD18	RAD18	RAD18.L;RAD18	RAD18	RAD18			RAD18_HUMAN	PUTATIVE E3 UBIQUITIN-PROTEIN LIGASE RAD18-LIKE ISOFORM X2;PUTATIVE E3 UBIQUITIN-PROTEIN LIGASE RAD18 ISOFORM X4;RAD18	RAD18_HUMAN	E3 UBIQUITIN-PROTEIN LIGASE RAD18-LIKE, TRANSCRIPT VARIANT X1; E3 UBIQUITIN-PROTEIN LIGASE RAD18-LIKE, TRANSCRIPT VARIANT X2
7951	PORTHOMCL7951[AjBfGgLvMmOjPsSp|(11 genes, 8 taxa)]:	-0.506264	-0.761934	-0.635495	0	0	0	0	0.175385	-0.866559	-0.742618	-0.736161	-0.781779	BLM	BLM	BLM					BLM	BLM_MOUSE;BLM	HYPOTHETICAL PROTEIN	BLM_XENLA	BLOOM SYNDROME PROTEIN HOMOLOG
3136	PORTHOMCL3136[AjBfCgCiDrGgLvMmOjOlPsSpXl|(18 genes, 13 taxa)]:	-0.102747	-0.610637	-0.381044	0.123524	-0.0746078	0.0717059	-0.825247	0.424846	-0.857294	-0.794365	-0.693458	-0.781706		CNTLN	CNTLN	CNTLN.L;CNTLN	CNTLN	CNTLN	CENTLEIN		CNTLN_MOUSE	PUTATIVE CENTLEIN;PUTATIVE CENTLEIN-LIKE	CNTLN_HUMAN	CENTLEIN
5151	PORTHOMCL5151[AjBfCgCiDrGgLvMmOjOlPsSpXl|(14 genes, 13 taxa)]:	-0.300495	-0.670505	-0.551813	0.400931	0.0858824	0.725765	-0.900623	-0.868426	-0.774118	-0.82355	-0.747426	-0.781698	BCAS2	BCAS2	BCAS2	BCAS2.L;BCAS2	BCAS2	BCAS2	PRE-MRNA-SPLICING FACTOR SPF27;BCAS2	BCAS2	SPF27_XENTR;BCAS2	PUTATIVE PRE-MRNA-SPLICING FACTOR SPF27;BCAS2	GCP2_MOUSE	PRE-MRNA-SPLICING FACTOR SPF27;BCAS2
5292	PORTHOMCL5292[AjBfCgCiDrGgLvMmOjOlPsSpXl|(14 genes, 13 taxa)]:	-0.324011	-0.460527	-0.636978	0.407059	-0.0431863	0.168441	-0.886182	0.435505	-0.820059	-0.788132	-0.735907	-0.781366	EDC4	EDC4	EDC4	LOC108715334	EDC4	EDC4	ENHANCER OF MRNA-DECAPPING PROTEIN 4-LIKE, TRANSCRIPT VARIANT X2; ENHANCER OF MRNA-DECAPPING PROTEIN 4-LIKE, TRANSCRIPT VARIANT X1;LOC100177860	EDC4	EDC4_XENLA	PUTATIVE ENHANCER OF MRNA-DECAPPING PROTEIN 4	EDC4_HUMAN	ENHANCER OF MRNA-DECAPPING PROTEIN 4
7496	PORTHOMCL7496[BfCgDrGgLvMmOjOlPsSpXl|(12 genes, 11 taxa)]:	-0.529615	-0.730418	-0.564505	-0.132353	-0.28924	0.529794	0	0.66104	-0.828647	-0.768854	-0.745956	-0.781152	DIS3	DIS3	DIS3	DIS3.L;DIS3	DIS3	DIS3			RRP44_MOUSE;DIS3		RRP44_MOUSE	EXOSOME COMPLEX EXONUCLEASE RRP44
6546	PORTHOMCL6546[AjBfCgCiDrGgLvMmOjOlPsSpXl|(13 genes, 13 taxa)]:	-0.607363	-0.906857	-0.656264	-0.647892	0.0265441	0.512118	-0.785143	-0.159782	-0.858754	-0.77806	-0.704167	-0.780327	BUB1B	BUB1B	BUB1B	BUB1B.L;BUB1B	BUB1B	BUB1BB	MITOTIC CHECKPOINT SERINE/THREONINE-PROTEIN KINASE BUB1		BUB1_HUMAN	HYPOTHETICAL PROTEIN	BUB1B_MOUSE	UNCHARACTERIZED LOC577602
5851	PORTHOMCL5851[AjBfCiDrGgLvMmOjOlPsSpXl|(14 genes, 12 taxa)]:	-0.100495	-0.474066	-0.586758	0.399828	0.117157	0.680529	-0.881753	-0.318821	-0.8965	-0.714551	-0.729609	-0.78022	CDT1	CDT1	CDT1	CDT1.S;CDT1.L;CDT1	CDT1	CDT1	DNA REPLICATION FACTOR CDT1;CDT1	CDT1	CDT1_XENLA;CDT1	PUTATIVE DNA REPLICATION FACTOR CDT1;LOC106177747	CDT1_XENLA	DNA REPLICATION FACTOR CDT1
4978	PORTHOMCL4978[AjBfCgCiDrGgLvMmOjOlPsSpXl|(15 genes, 13 taxa)]:	-0.448516	-0.895341	-0.567253	0.332672	0.0894363	0.224235	-0.916935	0.749301	-0.752059	-0.808875	-0.777083	-0.779339	RBM17	RBM17	RBM17	RBM17.S;RBM17.L;RBM17	RBM17	RBM17	SPLICING FACTOR 45-LIKE, TRANSCRIPT VARIANT X1; SPLICING FACTOR 45-LIKE, TRANSCRIPT VARIANT X2;RBM17	RBM17	SPF45_MOUSE;SPF45_HUMAN;RBM17	PUTATIVE SPLICING FACTOR 45	SPF45_HUMAN	SPLICING FACTOR 45
4261	PORTHOMCL4261[AjBfCgCiDrGgLvMmOjOlPsSpXl|(16 genes, 13 taxa)]:	-0.432802	-0.694462	-0.562253	0.0252941	0.131544	0.611382	-0.904234	-0.162727	-0.893265	-0.803117	-0.641176	-0.779186	NUP54	NUP54	NUP54	NUP54.S;LOC108711158;NUP54	NUP54	CU856510.1;NUP54	NUCLEOPORIN P54-LIKE;NUP54	NUP54	NUP54_MOUSE;NUP54	PUTATIVE NUCLEAR PORE COMPLEX PROTEIN	NUP54_RAT;NUP54	NUCLEAR PORE COMPLEX PROTEIN NUP54;NUP54
1466	PORTHOMCL1466[BfCgCiDrGgLvMmOjOlPsSpXl|(25 genes, 12 taxa)]:	-0.641429	-0.892747	-0.590495	0.306495	-0.654975	0.302441	-0.555494	-0.736016	-0.742765	-0.921445	-0.673039	-0.779083	HNRNPU	HNRNPUL1;HNRNPU	HNRNPUL1;HNRNPU;HNRNPUL2	HNRNPUL1.L;HNRNPU.S;HNRNPUL2.L;HNRNPU;HNRNPUL1	HNRNPUL1;SI:CH211-107M4.1;HNRNPUL2	HNRNPUL1 (1 OF MANY);HNRNPUB;HNRNPUL2;HNRNPUL1;HNRNPUA	HETEROGENEOUS NUCLEAR RIBONUCLEOPROTEIN U-LIKE PROTEIN 1;SERINE/ARGININE REPETITIVE MATRIX PROTEIN 2-LIKE;HNRNPUL1	HNRNPUL1	HNRL1_MOUSE;HNRNPUL1		HNRL1_HUMAN;HNRNPUL1	HETEROGENEOUS NUCLEAR RIBONUCLEOPROTEIN U-LIKE PROTEIN 1, TRANSCRIPT VARIANT X3; HETEROGENEOUS NUCLEAR RIBONUCLEOPROTEIN U-LIKE PROTEIN 1, TRANSCRIPT VARIANT X1; HETEROGENEOUS NUCLEAR RIBONUCLEOPROTEIN U-LIKE PROTEIN 1, TRANSCRIPT VARIANT X2;HNRNPUL1
9237	PORTHOMCL9237[AjCgCiLvOjSpXl|(9 genes, 7 taxa)]:	0	0	0	0.033385	0	0	-0.910052	0	-0.868176	-0.762229	-0.706005	-0.778803				ZNF235.L			ZINC FINGER PROTEIN		CTCF_CHICK	GASTRULA ZINC FINGER PROTEIN XLCGF17.1;ENHANCER BINDING PROTEIN;HYPOTHETICAL PROTEIN	CTCF_CHICK	ZINC FINGER AND BTB DOMAIN-CONTAINING PROTEIN 24, TRANSCRIPT VARIANT X1; ZINC FINGER AND BTB DOMAIN-CONTAINING PROTEIN 24, TRANSCRIPT VARIANT X2; ZINC FINGER AND BTB DOMAIN-CONTAINING PROTEIN 24, TRANSCRIPT VARIANT X4; ZINC FINGER AND BTB DOMAIN-CONTAINING PROTEIN 24, TRANSCRIPT VARIANT X3
6893	PORTHOMCL6893[BfCgCiDrGgLvMmOjOlPsSpXl|(13 genes, 12 taxa)]:	-0.217088	-0.597099	-0.495824	-0.296275	0.0774265	-0.0447941	-0.866091	0.784336	-0.787294	-0.803839	-0.74473	-0.778621	DOLPP1	DOLPP1	DOLPP1	DOLPP1.L	DOLPP1	DOLPP1	DOLICHYLDIPHOSPHATASE 1-LIKE;DOLPP1	DOLPP1	DOPP1_HUMAN;DOLPP1		DOPP1_RHIFE	DOLICHYLDIPHOSPHATASE 1;FORMIN-LIKE PROTEIN 3;DOLPP1
6487	PORTHOMCL6487[AjBfCgDrLvMmOjOlPsSpXl|(13 genes, 11 taxa)]:	0	-0.738286	-0.408516	-0.593235	-0.107672	-0.240618	0	0.231538	-0.877971	-0.760021	-0.697426	-0.778473		HLTF	HLTF	HLTF.L;HLTF	HLTF	HLTF		HLTF	HLTF_HUMAN	PUTATIVE HELICASE-LIKE TRANSCRIPTION FACTOR	HLTF_HUMAN	HELICASE-LIKE TRANSCRIPTION FACTOR;UNCHARACTERIZED LOC100893394
4918	PORTHOMCL4918[AjBfCgCiDrGgLvMmOjOlPsSpXl|(15 genes, 13 taxa)]:	-0.741044	-0.833363	-0.559011	0.150147	0.0543627	0.668324	-0.888468	-0.726543	-0.861676	-0.776244	-0.697304	-0.778408	CWF19L1	CWF19L1	CWF19L1	CWF19L1.L;CWF19L1	CWF19L1	CWF19L1	CWF19-LIKE PROTEIN 1;CWF19L1	CWF19L1	C19L1_XENLA;CWF19L1	PUTATIVE CWF19-LIKE PROTEIN 1-LIKE;CWF19L1	C19L1_DANRE;CWF19L1	CWF19-LIKE PROTEIN 1, TRANSCRIPT VARIANT X2; CWF19-LIKE PROTEIN 1, TRANSCRIPT VARIANT X1; CWF19-LIKE PROTEIN 1, TRANSCRIPT VARIANT X3;CWF19-LIKE PROTEIN 1;CWF19L1
1044	PORTHOMCL1044[AjBfCgCiDrGgLvMmOjOlPsSpXl|(29 genes, 13 taxa)]:	-0.0964835	-0.864747	-0.614176	-0.235392	-0.640564	-0.521029	-0.688156	0.132797	-0.903618	-0.804582	-0.626471	-0.778223	NCAPG2;DNPEP	NCAPG2	NCAPG2;DNPEP	NCAPG2.L;DNPEP.L;NCAPG2	NCAPG2;DNPEP	NCAPG2;DNPEP	CONDENSIN-2 COMPLEX SUBUNIT G2-LIKE;ASPARTYL AMINOPEPTIDASE-LIKE;DNPEP	DNPEP	CNDG2_XENLA;DNPEP_BOVIN;DNPEP_MOUSE;DNPEP	HYPOTHETICAL PROTEIN;PUTATIVE CONDENSIN-2 COMPLEX SUBUNIT G2	CNDG2_MOUSE	CONDENSIN-2 COMPLEX SUBUNIT G2;ASPARTYL AMINOPEPTIDASE;DNPEP
3977	PORTHOMCL3977[AjBfCgCiDrGgLvMmOjOlPsSpXl|(16 genes, 13 taxa)]:	-0.756044	-0.797099	-0.766209	0.084951	-0.399363	0.678882	-0.867844	-0.899395	-0.870559	-0.752962	-0.710662	-0.778061	NCAPH	NCAPH	NCAPH	NCAPH.S;BRRN1;NCAPH	NCAPH	NCAPH	CONDENSIN COMPLEX SUBUNIT 2-LIKE, TRANSCRIPT VARIANT X2; CONDENSIN COMPLEX SUBUNIT 2-LIKE, TRANSCRIPT VARIANT X3; CONDENSIN COMPLEX SUBUNIT 2-LIKE, TRANSCRIPT VARIANT X1;LOC100182561	NCAPH	CND2_XENLA;NCAPH	PUTATIVE CONDENSIN COMPLEX SUBUNIT 2;NCAPH	CND2_XENLA	CONDENSIN COMPLEX SUBUNIT 2;NCAPH
3054	PORTHOMCL3054[AjCgCiDrLvMmOjOlSpXl|(18 genes, 10 taxa)]:	0	0	-0.565	0.146814	-0.583456	0.623618	-0.799532	0	-0.872471	-0.870877	-0.589951	-0.777766			SRSF2;4930595M18RIK	SRSF2.S;SRSF2	SRSF2A;SRSF2B;SRSF2	SRSF10B;SRSF2A;SRSF2B;SRSF2	SERINE/ARGININE-RICH SPLICING FACTOR 2-LIKE, TRANSCRIPT VARIANT X2; SERINE/ARGININE-RICH SPLICING FACTOR 2-LIKE, TRANSCRIPT VARIANT X1;SERINE/ARGININE-RICH SPLICING FACTOR 12, TRANSCRIPT VARIANT X2; SERINE/ARGININE-RICH SPLICING FACTOR 12, TRANSCRIPT VARIANT X1;SRSF2;SRSF10			HYPOTHETICAL PROTEIN;SRSF2	SRSF2_CHICK	SERINE/ARGININE-RICH SPLICING FACTOR 2-LIKE
2278	PORTHOMCL2278[AjBfCgCiDrGgLvMmOjOlPsSpXl|(20 genes, 13 taxa)]:	-0.443516	-0.873055	-0.73544	0.401667	-0.541716	0.360559	-0.485935	-0.698174	-0.886588	-0.874159	-0.572304	-0.777684	FUBP3	FUBP1;FUBP3	FUBP1;FUBP3	FUBP1.L;FUBP3.S;FUBP1.S;FUBP3;FUBP1	FAR UPSTREAM ELEMENT-BINDING PROTEIN 3;FUBP1;FUBP3	FUBP1;FUBP3	FAR UPSTREAM ELEMENT-BINDING PROTEIN, TRANSCRIPT VARIANT X1; FAR UPSTREAM ELEMENT-BINDING PROTEIN, TRANSCRIPT VARIANT X2; FAR UPSTREAM ELEMENT-BINDING PROTEIN, TRANSCRIPT VARIANT X3; FAR UPSTREAM ELEMENT-BINDING PROTEIN		FUBP2_RAT	PUTATIVE FAR UPSTREAM ELEMENT-BINDING PROTEIN 1	FUBP3_HUMAN	FAR UPSTREAM ELEMENT-BINDING PROTEIN 3, TRANSCRIPT VARIANT X2; FAR UPSTREAM ELEMENT-BINDING PROTEIN 3, TRANSCRIPT VARIANT X1; FAR UPSTREAM ELEMENT-BINDING PROTEIN 3, TRANSCRIPT VARIANT X6; FAR UPSTREAM ELEMENT-BINDING PROTEIN 3, TRANSCRIPT VARIANT X3; FAR UPSTREAM ELEMENT-BINDING PROTEIN 3, TRANSCRIPT VARIANT X7; FAR UPSTREAM ELEMENT-BINDING PROTEIN 3, TRANSCRIPT VARIANT X5; FAR UPSTREAM ELEMENT-…
5210	PORTHOMCL5210[AjBfCgCiDrGgLvMmOjOlPsSpXl|(14 genes, 13 taxa)]:	-0.500934	-0.548791	-0.573297	-0.344706	-0.486103	0.0563235	-0.933065	0.488113	-0.856	-0.769143	-0.707108	-0.777417	GMPS	GMPS	GMPS	GMPS.S;GMPS	GMPS	GMPS	GMP SYNTHASE [GLUTAMINE-HYDROLYZING];GMPS	GMPS	GUAA_PONAB;GMPS	PUTATIVE GMP SYNTHASE;GMPS	GUAA_HUMAN;GMPS	GMP SYNTHASE [GLUTAMINE-HYDROLYZING], TRANSCRIPT VARIANT X3; GMP SYNTHASE [GLUTAMINE-HYDROLYZING], TRANSCRIPT VARIANT X1; GMP SYNTHASE [GLUTAMINE-HYDROLYZING], TRANSCRIPT VARIANT X4; GMP SYNTHASE [GLUTAMINE-HYDROLYZING], TRANSCRIPT VARIANT X2;GMPS
4183	PORTHOMCL4183[AjBfCgCiDrGgLvMmOjOlPsSpXl|(16 genes, 13 taxa)]:	-0.467637	-0.694154	-0.550165	-0.467696	-0.152623	-0.299029	-0.874688	0.597133	-0.86	-0.759071	-0.710417	-0.776496	ESF1		ESF1	ESF1.L;ESF1	ESF1	ESF1	ESF1 HOMOLOG, TRANSCRIPT VARIANT X2; ESF1 HOMOLOG, TRANSCRIPT VARIANT X1	ESF1	ESF1_MOUSE	PUTATIVE ESF1-LIKE ISOFORM X3	ESF1_MOUSE;ESF1	ESF1 HOMOLOG, TRANSCRIPT VARIANT X3; ESF1 HOMOLOG, TRANSCRIPT VARIANT X6; ESF1 HOMOLOG, TRANSCRIPT VARIANT X5; ESF1 HOMOLOG, TRANSCRIPT VARIANT X1; ESF1 HOMOLOG, TRANSCRIPT VARIANT X4; ESF1 HOMOLOG, TRANSCRIPT VARIANT X2;ESF1 HOMOLOG;ESF1
3717	PORTHOMCL3717[AjBfCgCiDrGgLvMmOjOlPsSpXl|(16 genes, 13 taxa)]:	-0.454835	-0.663648	-0.558791	-0.110417	0.160735	0.653676	-0.91913	-0.296986	-0.807029	-0.807141	-0.714461	-0.776211	RFWD3;LOC112065183	RFWD3	RFWD3	RFWD3.S;RFWD3.L;RFWD3	RFWD3	RFWD3	E3 UBIQUITIN-PROTEIN LIGASE RFWD3, TRANSCRIPT VARIANT X1; E3 UBIQUITIN-PROTEIN LIGASE RFWD3, TRANSCRIPT VARIANT X2	RFWD3	RFWD3_AILME;RFWD3	PUTATIVE E3 UBIQUITIN-PROTEIN LIGASE RFWD3;RFWD3	RFWD3_AILME	E3 UBIQUITIN-PROTEIN LIGASE RFWD3;RFWD3
3810	PORTHOMCL3810[AjBfCgCiGgLvMmOjOlPsSpXl|(16 genes, 12 taxa)]:	-0.462582	-0.600088	-0.569835	0.395515	0.0905392	0	-0.829818	0.837832	-0.877147	-0.735418	-0.715809	-0.776125	NCBP1	NCBP1	NCBP1	NCBP1.S;NCBP1.L;NCBP1	NCBP1		NUCLEAR CAP-BINDING PROTEIN SUBUNIT 1-A-LIKE;NCBP1	NCBP1	NBP1B_XENLA;NCBP1_SALSA	PUTATIVE NUCLEAR CAP-BINDING PROTEIN SUBUNIT 1-LIKE;NCBP1	NCBP1_SALSA	NUCLEAR CAP-BINDING PROTEIN SUBUNIT 1;NUCLEAR CAP-BINDING PROTEIN SUBUNIT 1-LIKE;NCBP1
4631	PORTHOMCL4631[AjBfCgCiDrGgLvMmOjOlPsSpXl|(15 genes, 13 taxa)]:	-0.510385	-0.608352	-0.624725	0.282083	-0.144583	0.600265	-0.588584	0.505315	-0.889088	-0.734985	-0.703922	-0.775998	MAD1L1	MAD1L1	MAD1L1	MAD1L1.L;MAD1L1	MAD1L1	MAD1L1	MITOTIC SPINDLE ASSEMBLY CHECKPOINT PROTEIN MAD1		MD1L1_HUMAN	PUTATIVE MITOTIC SPINDLE ASSEMBLY CHECKPOINT PROTEIN MAD1 ISOFORM X3	MD1L1_HUMAN;MAD1L1	MITOTIC SPINDLE ASSEMBLY CHECKPOINT PROTEIN MAD1, TRANSCRIPT VARIANT X2; MITOTIC SPINDLE ASSEMBLY CHECKPOINT PROTEIN MAD1, TRANSCRIPT VARIANT X3; MITOTIC SPINDLE ASSEMBLY CHECKPOINT PROTEIN MAD1, TRANSCRIPT VARIANT X1;MITOTIC SPINDLE ASSEMBLY CHECKPOINT PROTEIN MAD1-LIKE
2691	PORTHOMCL2691[AjBfCgCiDrGgLvMmOjOlPsSpXl|(19 genes, 13 taxa)]:	0.611484	-0.0477802	0.502363	0.115686	-0.0802451	0.186941	-0.869675	0.338392	-0.883206	-0.897833	-0.546691	-0.77591	CHPF;CHPF2	CHPF	CHPF;CHPF2	LOC108702913	CHPFA;CHPF	CHPF2;CHPFA;CHPFB;CHPF	CHONDROITIN SULFATE GLUCURONYLTRANSFERASE-LIKE;NOT6 PROTEIN;CHONDROITIN SULFATE SYNTHASE 2-LIKE;CHPF2		ABCB6_XENTR	PUTATIVE CHONDROITIN SULFATE SYNTHASE 2	RUVB2_MOUSE	CHONDROITIN SULFATE SYNTHASE 2
5664	PORTHOMCL5664[AjBfCiDrGgLvMmOjOlPsSpXl|(14 genes, 12 taxa)]:	-0.0898901	-0.884659	-0.822473	0.369926	0.17223	-0.120147	-0.866675	0.598182	-0.815588	-0.736264	-0.77549	-0.775781	IRAK1BP1	IRAK1BP1	IRAK1BP1	IRAK1BP1.S;IRAK1BP1	IRAK1BP1	IRAK1BP1	INTERLEUKIN-1 RECEPTOR-ASSOCIATED KINASE 1-BINDING PROTEIN 1-LIKE	IRAK1BP1	IKBP1_MOUSE	PUTATIVE INTERLEUKIN-1 RECEPTOR-ASSOCIATED KINASE 1-BINDING PROTEIN 1-LIKE;IRAK1BP1	IKBP1_HUMAN;IRAK1BP1	INTERLEUKIN-1 RECEPTOR-ASSOCIATED KINASE 1-BINDING PROTEIN 1-LIKE;IRAK1BP1
3995	PORTHOMCL3995[AjBfCiDrGgLvMmOjOlPsSpXl|(16 genes, 12 taxa)]:	-0.20978	-0.498989	-0.730549	-0.099951	-0.0604167	0.590059	-0.879325	0.422517	-0.887206	-0.743013	-0.696814	-0.775678	WDR76	WDR76	WDR76	WDR76.S;WDR76	WDR76	WDR76	WD REPEAT-CONTAINING PROTEIN 76		WDR76_XENLA;WDR76	PUTATIVE WD REPEAT-CONTAINING PROTEIN 76	WDR76_XENLA	WD REPEAT-CONTAINING PROTEIN 76;WDR76
7108	PORTHOMCL7108[BfCgDrGgLvMmOjOlPsSpXl|(12 genes, 11 taxa)]:	-0.386374	-0.550505	-0.55533	-0.145417	0.161544	0.448912	0	-0.44442	-0.713971	-0.766667	-0.844853	-0.775163	DHX33	DHX33	DHX33	DHX33.L;DHX33	DHX33	DHX33		DHX34	DHX34_MOUSE;DHX33_MOUSE;DHX34;DHX33		DHX33_MOUSE;DHX33	PUTATIVE ATP-DEPENDENT RNA HELICASE DHX33, TRANSCRIPT VARIANT X2; PUTATIVE ATP-DEPENDENT RNA HELICASE DHX33, TRANSCRIPT VARIANT X1;DHX33
13953	PORTHOMCL13953[BfLvOjSp|(5 genes, 4 taxa)]:	0	0	0	0	0	0	0	0.443077	-0.780441	-0.84644	-0.698407	-0.775096									YWIE_CAEEL		SURF6_MOUSE	SURFEIT LOCUS PROTEIN 6 HOMOLOG, TRANSCRIPT VARIANT X1; SURFEIT LOCUS PROTEIN 6 HOMOLOG, TRANSCRIPT VARIANT X2
5230	PORTHOMCL5230[AjBfCgCiDrGgLvMmOjOlPsSpXl|(14 genes, 13 taxa)]:	0.18544	-0.381758	-0.497967	-0.777192	-0.111324	-0.4665	-0.830442	-0.646188	-0.884259	-0.776925	-0.66299	-0.774725	SLC35B4	SLC35B4	SLC35B4	SLC35B4.L;SLC35B4	SLC35B4	SLC35B4	UDP-XYLOSE AND UDP-N-ACETYLGLUCOSAMINE TRANSPORTER, TRANSCRIPT VARIANT X1; UDP-XYLOSE AND UDP-N-ACETYLGLUCOSAMINE TRANSPORTER, TRANSCRIPT VARIANT X2; UDP-XYLOSE AND UDP-N-ACETYLGLUCOSAMINE TRANSPORTER, TRANSCRIPT VARIANT X3;SLC35B4	SLC35B4	S35B4_DANRE	PUTATIVE UDP-XYLOSE AND UDP-N-ACETYLGLUCOSAMINE TRANSPORTER-LIKE;HYPOTHETICAL PROTEIN;SLC35B4	S35B4_DANRE	UDP-XYLOSE AND UDP-N-ACETYLGLUCOSAMINE TRANSPORTER;SLC35B4
3397	PORTHOMCL3397[AjBfCgCiDrGgLvMmOjOlPsSpXl|(17 genes, 13 taxa)]:	-0.352033	-0.670374	-0.571099	-0.0738971	-0.52152	0.0132353	-0.820176	-0.800653	-0.902324	-0.657358	-0.762868	-0.774183	DDX52	DDX52	DDX52	DDX52.L;DDX52.S;DDX52	DDX52	DDX52	PROBABLE ATP-DEPENDENT RNA HELICASE DDX52;DDX52	DDX52	DDX52_RAT;DDX52	PUTATIVE ATP-DEPENDENT RNA HELICASE DDX52	DDX52_MOUSE	PROBABLE ATP-DEPENDENT RNA HELICASE DDX52;DDX52
6658	PORTHOMCL6658[AjBfCgCiDrGgLvMmOjOlPsSpXl|(13 genes, 13 taxa)]:	-0.0823077	-0.63811	-0.569066	0.366446	0.0356863	0.727765	-0.90587	-0.546211	-0.868706	-0.733664	-0.719975	-0.774115	CDC6	CDC6	CDC6	CDC6.S	CDC6	CDC6	CELL DIVISION CONTROL PROTEIN 6 HOMOLOG;CDC6	CDC6	CDC6_HUMAN;CDC6	HYPOTHETICAL PROTEIN;CDC6	CDC6_HUMAN;CDC6	CELL DIVISION CONTROL PROTEIN 6;CDC6
3478	PORTHOMCL3478[AjBfCgCiDrGgLvMmOjOlPsSpXl|(17 genes, 13 taxa)]:	-0.311484	-0.807297	-0.569066	0.539216	-0.0209741	0.0671765	-0.342896	0	-0.793706	-0.786687	-0.740319	-0.773571	CCDC18	CCDC18	CCDC18	CCDC18.L;CCDC18.S;CCDC18		SI:DKEYP-1A11.3;SI:CH73-389B16.1;CCDC18	COILED-COIL DOMAIN-CONTAINING PROTEIN 18-LIKE;LOC100177482		CCD18_HUMAN	PUTATIVE COILED-COIL DOMAIN-CONTAINING PROTEIN	CCD18_HUMAN;SOJO_XENLA	COILED-COIL DOMAIN-CONTAINING PROTEIN 18
5929	PORTHOMCL5929[AjCgCiDrGgLvMmOjOlPsSpXl|(14 genes, 12 taxa)]:	-0.509615	-0.895033	-0.578407	0.307873	0.0506618	0.716206	-0.928597	0	-0.879147	-0.752239	-0.688603	-0.77333	CENPN	CENPN	CENPN	CENPN.L;CENPN.S;CENPN	CENPN	CENPN	CENTROMERE PROTEIN N-LIKE		CENNA_XENLA	PUTATIVE CENTROMERE PROTEIN N	CENPN_BOVIN	CENTROMERE PROTEIN N
6127	PORTHOMCL6127[AjBfCgCiDrGgLvMmOjOlPsSpXl|(13 genes, 13 taxa)]:	0.291648	-0.853626	-0.617308	-0.68402	0.280074	-0.739735	-0.92474	0.315245	-0.793765	-0.746605	-0.778431	-0.772934	MBTPS2	MBTPS2	MBTPS2	MBTPS2.L;MBTPS2	MBTPS2	MBTPS2	MEMBRANE-BOUND TRANSCRIPTION FACTOR SITE-2 PROTEASE, TRANSCRIPT VARIANT X1; MEMBRANE-BOUND TRANSCRIPTION FACTOR SITE-2 PROTEASE, TRANSCRIPT VARIANT X2	MBTPS2	MBTP2_CRIGR;MBTPS2	PUTATIVE MEMBRANE-BOUND TRANSCRIPTION FACTOR SITE-2 PROTEASE;MBTPS2	MBTP2_CRIGR	MEMBRANE-BOUND TRANSCRIPTION FACTOR SITE-2 PROTEASE
5288	PORTHOMCL5288[AjBfCgCiDrGgLvMmOjOlPsSpXl|(14 genes, 13 taxa)]:	-0.0652198	-0.55789	-0.0435165	-0.171789	-0.566495	-0.831765	-0.862286	-0.784587	-0.908059	-0.77259	-0.636887	-0.772512	SLC30A5	SLC30A5	SLC30A5	SLC30A5.L;LOC108707280;SLC30A5	SLC30A5	SLC30A5	ZINC TRANSPORTER 5-LIKE;SLC30A5	SLC30A5	ZNT5_MOUSE;SLC30A5	PUTATIVE ZINC TRANSPORTER 5;SLC30A5	ZNT5_DANRE;SLC30A5	ZINC TRANSPORTER 5;SLC30A5
4546	PORTHOMCL4546[AjBfCgCiDrGgLvMmOjOlPsSpXl|(15 genes, 13 taxa)]:	-0.771044	-0.88	-0.57544	-0.0790196	0.0159804	0.720912	-0.838948	-0.576434	-0.877382	-0.719381	-0.720466	-0.77241	NCAPG	NCAPG	NCAPG	NCAPG.L;NCAPG	NCAPG	NCAPG	CONDENSIN COMPLEX SUBUNIT 3, TRANSCRIPT VARIANT X1; CONDENSIN COMPLEX SUBUNIT 3, TRANSCRIPT VARIANT X2;LOC100176733	NCAPG	CND3_XENLA;NCAPG	PUTATIVE CONDENSIN COMPLEX SUBUNIT 3-LIKE;NCAPG	CND3_XENLA;NCAPG	CONDENSIN COMPLEX SUBUNIT 3-LIKE;CONDENSIN COMPLEX SUBUNIT 3, TRANSCRIPT VARIANT X2; CONDENSIN COMPLEX SUBUNIT 3, TRANSCRIPT VARIANT X1
6480	PORTHOMCL6480[AjBfCgCiDrGgLvMmOjOlPsSpXl|(13 genes, 13 taxa)]:	-0.620824	-0.67833	-0.789341	0.410809	-0.544828	0.523618	-0.73287	0.624965	-0.891441	-0.766687	-0.658456	-0.772195	METTL14	METTL14	METTL14	METTL14.L;METTL14	METTL14	METTL14	METHYLTRANSFERASE-LIKE PROTEIN 14 HOMOLOG;METTL14	METTL14	MET14_DANRE;METTL14	PUTATIVE METHYLTRANSFERASE-LIKE PROTEIN 14-LIKE;METTL14	MET14_DANRE	N6-ADENOSINE-METHYLTRANSFERASE SUBUNIT METTL14;METTL14
4563	PORTHOMCL4563[AjBfCgCiGgLvMmOjOlPsSpXl|(15 genes, 12 taxa)]:	-0.45044	-0.648264	-0.554615	0.148235	-0.0310784	0	-0.782675	-0.93958	-0.920265	-0.585924	-0.809339	-0.771842	DHX37	DHX37	DHX37	DHX37.L;DHX37.S;DHX37	DHX37		PROBABLE ATP-DEPENDENT RNA HELICASE DHX37;DHX37	DHX37	DHX37_HUMAN;DHX37	PUTATIVE ATP-DEPENDENT RNA HELICASE DHX37;DHX37	DHX37_HUMAN	PROBABLE ATP-DEPENDENT RNA HELICASE DHX37;DHX37
2956	PORTHOMCL2956[AjBfCgCiDrGgLvMmOjOlPsSpXl|(18 genes, 13 taxa)]:	-0.558187	-0.684615	-0.572253	0.408554	-0.627941	0.724382	-0.763805	-0.643989	-0.714441	-0.932817	-0.667892	-0.771717	SMC3	SMC3	SMC3	SMC3.S	SMC3	SMC3	STRUCTURAL MAINTENANCE OF CHROMOSOMES PROTEIN 3-LIKE, TRANSCRIPT VARIANT X1; STRUCTURAL MAINTENANCE OF CHROMOSOMES PROTEIN 3-LIKE, TRANSCRIPT VARIANT X2		SMC3_XENLA	PUTATIVE STRUCTURAL MAINTENANCE OF CHROMOSOMES PROTEIN 3;PUTATIVE STRUCTURAL MAINTENANCE OF CHROMOSOMES PROTEIN 3 ISOFORM X3;PUTATIVE STRUCTURAL MAINTENANCE OF CHROMOSOMES PROTEIN 3 ISOFORM X2	SMC3_PONAB	STRUCTURAL MAINTENANCE OF CHROMOSOMES PROTEIN 3, TRANSCRIPT VARIANT X3; STRUCTURAL MAINTENANCE OF CHROMOSOMES PROTEIN 3, TRANSCRIPT VARIANT X2; STRUCTURAL MAINTENANCE OF CHROMOSOMES PROTEIN 3, TRANSCRIPT VARIANT X1;STRUCTURAL MAINTENANCE OF CHROMOSOMES PROTEIN 3
2958	PORTHOMCL2958[AjBfCgCiDrGgLvMmOjOlPsSpXl|(18 genes, 13 taxa)]:	-0.179066	-0.453231	-0.230824	0.369461	0.222868	0.618265	-0.753675	0.767552	-0.842618	-0.748277	-0.723529	-0.771475	TMEM168	TMEM168	TMEM168	TMEM168.S;TMEM168.L;TMEM168	TMEM168B;TMEM168 (1 OF MANY);TMEM168	TMEM168A;TMEM168B;TMEM168	TRANSMEMBRANE PROTEIN 168-A-LIKE	TMEM168	TM168_XENLA;TMEM168	PUTATIVE TRANSMEMBRANE PROTEIN;TMEM168	TM168_BOVIN	TRANSMEMBRANE PROTEIN 168
5333	PORTHOMCL5333[AjBfCgCiDrLvMmOjOlPsSpXl|(14 genes, 12 taxa)]:	0	-0.554125	-0.707088	0.134485	-0.189265	0.475382	0	-0.0456473	-0.894853	-0.711013	-0.706315	-0.770727		ANKLE1	ANKLE1	LOC108712891	ANKYRIN REPEAT AND LEM DOMAIN CONTAINING 1;ANKLE1	ZGC:85936	ANKYRIN REPEAT AND LEM DOMAIN-CONTAINING PROTEIN 1-LIKE		ANKL1_HUMAN	PUTATIVE ANKYRIN REPEAT AND LEM DOMAIN-CONTAINING PROTEIN 1	ANKL1_HUMAN	ANKYRIN REPEAT AND LEM DOMAIN-CONTAINING PROTEIN 1
5624	PORTHOMCL5624[AjBfCgCiDrGgLvMmOjOlPsSpXl|(14 genes, 13 taxa)]:	-0.445604	-0.708088	-0.56456	-0.00539216	0.0633088	0.679176	-0.885169	-0.498125	-0.883529	-0.684293	-0.743873	-0.770565	DCPS	DCPS	DCPS	DCPS.L;DCPS	DCPS	DCPS	M7GPPPX DIPHOSPHATASE-LIKE;DCPS	DCPS	DCPS_HUMAN;DCPS	PUTATIVE M7GPPPX DIPHOSPHATASE ISOFORM X1;DCPS	DCPS_BOVIN	M7GPPPX DIPHOSPHATASE, TRANSCRIPT VARIANT X1; M7GPPPX DIPHOSPHATASE, TRANSCRIPT VARIANT X2;DCPS
2946	PORTHOMCL2946[AjBfDrGgLvMmOjOlPsSpXl|(18 genes, 11 taxa)]:	-0.379451	-0.715165	-0.562253	0.43875	-0.217843	0.698324	0	-0.214948	-0.677294	-0.905965	-0.727574	-0.770278	DDX3X	DDX3X	D1PAS1;DDX3Y;DDX3X	DDX3X.S;LOC108704425	DEAD-BOX HELICASE 3 X-LINKED;DDX3X	DDX4;DDX3B;DDX3A			DDX4_BOVIN;DDX3Y_MOUSE;DDX3_XENLA;DDX4	HYPOTHETICAL PROTEIN	DDX3Y_MOUSE;DDX3X	ATP-DEPENDENT RNA HELICASE DDX3Y
4876	PORTHOMCL4876[AjBfCgCiDrGgLvMmOjOlPsSpXl|(15 genes, 13 taxa)]:	-0.451264	-0.545231	-0.53489	-0.554044	-0.138211	0.0526176	-0.722026	0.334078	-0.853706	-0.873498	-0.582966	-0.770057	NOL6	NOL6	NOL6	NOL6.L;NOL6	NOL6	NOL6	NUCLEOLAR PROTEIN 6-LIKE;NOL6	NOL6	NOL6_XENLA;NOL6	PUTATIVE NUCLEOLAR PROTEIN 6-LIKE;HYPOTHETICAL PROTEIN	NOL6_XENTR	NUCLEOLAR PROTEIN 6;NOL6
6366	PORTHOMCL6366[AjBfCgCiDrGgLvMmOjOlPsSpXl|(13 genes, 13 taxa)]:	-0.569615	-0.865143	-0.693681	0.188873	0.00752451	0.735235	-0.911104	-0.68165	-0.890294	-0.70264	-0.716544	-0.769826	CDC7	CDC7	CDC7	CDC7.L;CDC7	CDC7	CDC7	CELL DIVISION CYCLE 7-RELATED PROTEIN KINASE-LIKE;CDC7	CDC7	CDC7_MOUSE;CDC7	PUTATIVE CELL DIVISION CYCLE 7-RELATED PROTEIN KINASE-LIKE ISOFORM X1;CDC7	CDC7_HUMAN	CELL DIVISION CYCLE 7-RELATED PROTEIN KINASE;CDC7
5760	PORTHOMCL5760[AjBfCgCiDrGgLvMmOjOlPsSpXl|(14 genes, 13 taxa)]:	-0.373077	-0.885055	-0.562527	0.365147	-0.606789	0.721147	-0.26913	-0.562098	-0.83	-0.688896	-0.789338	-0.769411	RBBP5	RBBP5	RBBP5	RBBP5.S;RBBP5	RBBP5	RBBP5	RETINOBLASTOMA-BINDING PROTEIN 5-LIKE;RBBP5	RBBP5	RBBP5_HUMAN;RBBP5	PUTATIVE RETINOBLASTOMA-BINDING PROTEIN 5 ISOFORM X3;RBBP5	RBBP5_HUMAN;RBBP5	RETINOBLASTOMA-BINDING PROTEIN 5;RBBP5
1238	PORTHOMCL1238[AjBfCgCiDrGgLvMmOjOlPsSpXl|(27 genes, 13 taxa)]:	0.369945	-0.660747	-0.819121	-0.0864216	0.226863	0.310118	-0.828416	-0.0122835	-0.899147	-0.852446	-0.556618	-0.769404	PIAS1;PIAS2;PIAS3	PIAS3;PIAS2;PIAS1	PIAS2;PIAS1;PIAS3	PIAS3.L;PIAS1.S;LOC108707347	PIAS1B;PIAS1A;PIAS2;PIAS1	PIAS1B;PIAS1A;PIAS2	PROTEIN INHIBITOR OF ACTIVATED STAT, TRANSCRIPT VARIANT X4; PROTEIN INHIBITOR OF ACTIVATED STAT, TRANSCRIPT VARIANT X3; PROTEIN INHIBITOR OF ACTIVATED STAT, TRANSCRIPT VARIANT X2; PROTEIN INHIBITOR OF ACTIVATED STAT; PROTEIN INHIBITOR OF ACTIVATED STAT, TRANSCRIPT VARIANT X1;PIAS3		PIAS3_MOUSE;PIAS1	PUTATIVE E3 SUMO-PROTEIN LIGASE PIAS3	PIAS2_RAT	E3 SUMO-PROTEIN LIGASE PIAS2, TRANSCRIPT VARIANT X1; E3 SUMO-PROTEIN LIGASE PIAS2, TRANSCRIPT VARIANT X2; E3 SUMO-PROTEIN LIGASE PIAS2, TRANSCRIPT VARIANT X3
3518	PORTHOMCL3518[AjBfCgCiDrGgLvMmOjOlPsSpXl|(17 genes, 13 taxa)]:	-0.475385	-0.718989	-0.720714	0.351936	-0.513529	0.689941	-0.455377	-0.167601	-0.863706	-0.748153	-0.695956	-0.769271	ILF2	ILF2	ILF2	ILF2.L;ILF2.S;ILF2	ILF2	ILF2	NF45 PROTEIN, TRANSCRIPT VARIANT X1; NF45 PROTEIN;UNCHARACTERIZED LOC100186668;ILF2	ILF2	ILF2_XENTR	PUTATIVE INTERLEUKIN ENHANCER-BINDING FACTOR 2 ISOFORM X2;ILF2	ILF2_PONAB	INTERLEUKIN ENHANCER-BINDING FACTOR 2, TRANSCRIPT VARIANT X3; INTERLEUKIN ENHANCER-BINDING FACTOR 2, TRANSCRIPT VARIANT X1; INTERLEUKIN ENHANCER-BINDING FACTOR 2, TRANSCRIPT VARIANT X2;INTERLEUKIN ENHANCER-BINDING FACTOR 2 HOMOLOG;ILF2
3984	PORTHOMCL3984[AjBfCgCiDrGgLvMmOjOlPsSpXl|(16 genes, 13 taxa)]:	-0.664011	-0.809451	-0.74533	0.00821078	-0.717819	0.4205	-0.873273	0.100739	-0.824176	-0.839278	-0.642279	-0.768578	NEDD1	NEDD1	NEDD1	NEDD1.S;NEDD1.L;NEDD1	PROTEIN NEDD1;NEDD1	NEDD1	PROTEIN NEDD1, TRANSCRIPT VARIANT X2; PROTEIN NEDD1, TRANSCRIPT VARIANT X1		NEDD1_HUMAN	HYPOTHETICAL PROTEIN	NEDD1_MOUSE	PROTEIN NEDD1
4144	PORTHOMCL4144[AjBfCgCiDrGgLvMmOjOlPsSpXl|(16 genes, 13 taxa)]:	-0.641923	-0.855429	-0.747967	-0.0939706	0.0211765	0.444471	-0.798896	-0.610572	-0.824265	-0.77548	-0.70576	-0.768501	KIF15	KIF15	KIF15	KIF15.S;KIF15.L;KIF15	KIF15	KIF15	KINESIN-LIKE PROTEIN 2	KIF15	KIF15_STRPU;KIF15	PUTATIVE KINESIN-LIKE PROTEIN KIF15-LIKE;KINESIN-LIKE PROTEIN KIF15;KIF15	KIF15_STRPU	KINESIN-LIKE PROTEIN KRP180;KIF15
4424	PORTHOMCL4424[AjBfCgCiDrGgLvMmOjOlPsSpXl|(15 genes, 13 taxa)]:	-0.506868	-0.823473	-0.623462	0.12076	0.146127	0.701	-0.871286	0.0528671	-0.901088	-0.747761	-0.656373	-0.768407	LIN9	LIN9	LIN9	LIN9.L;LIN9.S;LIN9	LIN9	LIN9	PROTEIN LIN-9 HOMOLOG;LIN9	LIN9	LIN9_HUMAN;LIN9	PUTATIVE PROTEIN LIN-9-LIKE;LIN9	LIN9_MOUSE;LIN9	PROTEIN LIN-9 HOMOLOG
5337	PORTHOMCL5337[AjBfCgCiDrGgLvMmOjOlPsSpXl|(14 genes, 13 taxa)]:	-0.590824	-0.809407	-0.70478	0.380588	0.120466	0.717265	-0.875442	0	-0.869735	-0.719401	-0.715319	-0.768152	CCDC77	CCDC77	CCDC77	CCDC77.L;CCDC77	CCDC77	CCDC77	COILED-COIL DOMAIN-CONTAINING PROTEIN 77;CCDC77		CCD77_XENLA;CCDC77	PUTATIVE COILED-COIL DOMAIN-CONTAINING PROTEIN;CCDC77	CCD77_XENLA;CCDC77	COILED-COIL DOMAIN-CONTAINING PROTEIN 77;CCDC77
1252	PORTHOMCL1252[AjBfCgCiDrGgLvMmOjOlPsSpXl|(26 genes, 13 taxa)]:	-0.551374	-0.677626	-0.607637	0.114608	0.265098	0.590059	-0.920221	-0.785222	-0.879088	-0.749804	-0.672549	-0.767147	PAPD5;PAPD7;TENT4B;TENT4A	PAPD5;TENT4B	PAPD7;PAPD5;TENT4A;TENT4B	PAPD5.L;XELAEV18024710M	TENT4A;TENT4B	PAPD7;PAPD5;TENT4B	NON-CANONICAL POLY(A) RNA POLYMERASE PAPD5-LIKE, TRANSCRIPT VARIANT X2;TENT4A (1 OF MANY)		PAPD5_MOUSE;TENT4B	PUTATIVE NON-CANONICAL POLY(A) RNA POLYMERASE PAPD5;PAPD5	PAPD5_MOUSE	NON-CANONICAL POLY(A) RNA POLYMERASE PAPD5
3295	PORTHOMCL3295[AjBfCgCiDrGgLvMmOjOlPsSpXl|(17 genes, 13 taxa)]:	-0.574286	-0.853275	-0.534011	0.172525	0.133505	0.0855	-0.882675	0	-0.720265	-0.814076	-0.766789	-0.767043	ACTR6	ACTR6	ACTR6	ACTR6.L;ACTR6	ACTR6	ACTR6	ACTIN-RELATED PROTEIN 6-LIKE;ACTR6	ACTR6	ARP6_HUMAN;ACTR6	PUTATIVE ACTIN-RELATED PROTEIN 6;ACTR6	ARP6_CHICK;ACTR6	ACTIN-RELATED PROTEIN 6;ACTR6
2990	PORTHOMCL2990[AjBfCgCiDrGgLvMmOjOlPsSpXl|(18 genes, 13 taxa)]:	-0.494176	-0.600132	-0.563187	0.350564	0.0877696	0.626588	-0.710117	0	-0.813176	-0.751249	-0.736275	-0.7669	U2AF1	U2AF1;U2AF1L4	U2AF1;U2AF1L4	U2AF1.S;U2AF1.L;U2AF1	SPLICING FACTOR U2AF 35 KDA SUBUNIT;U2AF1	U2AF1	ZINC FINGER (C-X8-C-X5-C-X3-H)-16	U2AF1	U2AF1_BOVIN;U2AF1	PUTATIVE SPLICING FACTOR;U2AF1	U2AF1_BOVIN	SPLICING FACTOR U2AF 35 KDA SUBUNIT, TRANSCRIPT VARIANT X2; SPLICING FACTOR U2AF 35 KDA SUBUNIT, TRANSCRIPT VARIANT X1
3842	PORTHOMCL3842[AjBfCgCiDrGgLvMmOjOlPsSpXl|(16 genes, 13 taxa)]:	-0.447143	-0.674813	-0.486264	-0.872108	-0.0767402	0.169118	-0.766169	-0.585906	-0.915118	-0.756656	-0.628922	-0.766899	CHCHD4	CHCHD4	CHCHD4;AU015836	CHCHD4.L	MITOCHONDRIAL INTERMEMBRANE SPACE IMPORT AND ASSEMBLY PROTEIN 40-B;CHCHD4	CHCHD4A;CHCHD4	MITOCHONDRIAL INTERMEMBRANE SPACE IMPORT AND ASSEMBLY PROTEIN 40-A-LIKE	CHCHD4	MIA40_BOVIN;CHCHD4	PUTATIVE MITOCHONDRIAL INTERMEMBRANE SPACE IMPORT AND ASSEMBLY PROTEIN 40-LIKE	MIA40_DANRE	MITOCHONDRIAL INTERMEMBRANE SPACE IMPORT AND ASSEMBLY PROTEIN 40;CHCHD4
2241	PORTHOMCL2241[AjBfCgCiDrGgLvMmOjOlPsSpXl|(20 genes, 13 taxa)]:	0.148681	-0.621187	-0.552363	0.282819	-0.552745	-0.8427	-0.75039	0.0440559	-0.830588	-0.778638	-0.691422	-0.766883	CCDC171	CCDC171	CCDC171	LOC108713715;CCDC171	COILED-COIL DOMAIN CONTAINING 171	CU682355.2;SI:CH211-116M6.4	COILED-COIL DOMAIN-CONTAINING PROTEIN 171-LIKE		CC171_MOUSE	PUTATIVE COILED-COIL DOMAIN-CONTAINING PROTEIN;UNCHARACTERIZED PROTEIN C9ORF93	CC171_HUMAN	COILED-COIL DOMAIN-CONTAINING PROTEIN 171, TRANSCRIPT VARIANT X2; COILED-COIL DOMAIN-CONTAINING PROTEIN 171, TRANSCRIPT VARIANT X1;COILED-COIL DOMAIN-CONTAINING PROTEIN 171;COILED-COIL DOMAIN-CONTAINING PROTEIN 171-LIKE
4811	PORTHOMCL4811[AjBfCgCiDrGgLvMmOjOlPsSpXl|(15 genes, 13 taxa)]:	-0.346099	-0.77556	-0.543242	-0.0682108	-0.0103186	0.0922059	-0.824195	0.402098	-0.906206	-0.847327	-0.546446	-0.76666	ZDHHC6	ZDHHC6	ZDHHC6	ZDHHC6.L;ZDHHC6	ZDHHC6	ZDHHC6	ZINC FINGER (DHHC/FYVE/PHD)-1;ZDHHC6		ZDHC6_PONAB;ZDHHC6	PUTATIVE PALMITOYLTRANSFERASE ZDHHC6-LIKE ISOFORM X2;ZDHHC6	ZDHC6_MOUSE	PALMITOYLTRANSFERASE ZDHHC6;ZDHHC6
4449	PORTHOMCL4449[AjBfCgCiDrGgLvMmOjOlPsSpXl|(15 genes, 13 taxa)]:	0.108407	0.505451	0.0665385	-0.112696	-0.724142	-0.378147	-0.473052	-0.0616084	-0.740471	-0.771125	-0.788113	-0.766569	PSPH	PSPH	PSPH	PSPH.L;PSPH.S;PSPH	PSPH	PSPH	PHOSPHOSERINE PHOSPHATASE-LIKE, TRANSCRIPT VARIANT X2; PHOSPHOSERINE PHOSPHATASE-LIKE, TRANSCRIPT VARIANT X1;PSPH	PSPH	SERB_BOVIN;PSPH	PUTATIVE PHOSPHOSERINE PHOSPHATASE;PSPH	SERB_BOVIN	PHOSPHOSERINE PHOSPHATASE;PSPH
5022	PORTHOMCL5022[AjCgCiDrGgLvMmOjOlPsSpXl|(15 genes, 12 taxa)]:	-0.421429	-0.731692	-0.58978	0.217574	-0.33799	-0.905933	-0.926883	0	-0.723559	-0.75645	-0.81826	-0.76609			HUS1;HUS1B;LOC111156993	HUS1.L	ZGC:162895	HUS1B	CHECKPOINT PROTEIN HUS1-LIKE, TRANSCRIPT VARIANT X2; CHECKPOINT PROTEIN HUS1-LIKE, TRANSCRIPT VARIANT X1;HUS1		HUS1_HUMAN	PUTATIVE CHECKPOINT PROTEIN HUS1	HUS1_MOUSE;HUS1_HUMAN	CHECKPOINT PROTEIN HUS1
5249	PORTHOMCL5249[AjBfCgCiDrGgLvMmOjOlPsSpXl|(14 genes, 13 taxa)]:	-0.581923	-0.907956	-0.681099	0.0400734	0.101593	0.672029	-0.764597	0.795874	-0.84487	-0.743736	-0.709559	-0.766055	SKP2	SKP2	SKP2	SKP2.L;SKP2	SKP2	SKP2	S-PHASE KINASE-ASSOCIATED PROTEIN 2		SKP2_HUMAN	PUTATIVE S-PHASE KINASE-ASSOCIATED PROTEIN 2	SKP2_MOUSE	S-PHASE KINASE-ASSOCIATED PROTEIN 2
13291	PORTHOMCL13291[AjBfLvOjSp|(5 genes, 5 taxa)]:	0	0	0	0	0	0	0	-0.32958	-0.900029	-0.715397	-0.682598	-0.766008									USPL1_MOUSE	PUTATIVE SUMO-SPECIFIC ISOPEPTIDASE USPL1	USPL1_HUMAN	SUMO-SPECIFIC ISOPEPTIDASE USPL1
3538	PORTHOMCL3538[AjCgCiDrGgLvMmOjOlPsSpXl|(17 genes, 12 taxa)]:	-0.793132	-0.817187	-0.614835	0.317377	0.0757108	0.665	-0.921987	0	-0.870176	-0.841816	-0.584314	-0.765436	ARHGAP19		ARHGAP19	ARHGAP19.L;ARHGAP19	RHO GTPASE-ACTIVATING PROTEIN 19;ARHGAP19	ARHGAP19	RHO GTPASE-ACTIVATING PROTEIN 19-LIKE		RHG19_HUMAN	PUTATIVE RHO GTPASE-ACTIVATING PROTEIN 19;ARHGAP19	RHG19_HUMAN	RHO GTPASE-ACTIVATING PROTEIN 19;SERINE/ARGININE REPETITIVE MATRIX PROTEIN 1;RHO GTPASE-ACTIVATING PROTEIN 19-LIKE
3403	PORTHOMCL3403[AjBfCgCiDrGgLvMmOjOlPsSpXl|(17 genes, 13 taxa)]:	-0.556154	-0.854154	-0.765385	0.391201	0.131005	0.733824	-0.767338	0.269231	-0.891679	-0.726233	-0.676961	-0.764958	SASS6	SASS6	SASS6	SASS6.L;SASS6.2.L;SASS6	SASS6	SASS6	SPINDLE ASSEMBLY ABNORMAL PROTEIN 6 HOMOLOG;SASS6	SASS6	SAS6_XENLA;SASS6	PUTATIVE SPINDLE ASSEMBLY ABNORMAL PROTEIN 6-LIKE;SASS6	SAS6_CHICK;SASS6	SPINDLE ASSEMBLY ABNORMAL PROTEIN 6 HOMOLOG, TRANSCRIPT VARIANT X3; SPINDLE ASSEMBLY ABNORMAL PROTEIN 6 HOMOLOG, TRANSCRIPT VARIANT X1; SPINDLE ASSEMBLY ABNORMAL PROTEIN 6 HOMOLOG, TRANSCRIPT VARIANT X2;SASS6
12005	PORTHOMCL12005[AjCiLvOjSp|(6 genes, 5 taxa)]:	0	0	0	0	0	0	-0.235231	0	-0.887588	-0.770753	-0.634926	-0.764423							UNCHARACTERIZED LOC108950157		CEP63_CHICK	HYPOTHETICAL PROTEIN;PUTATIVE CENTROSOMAL PROTEIN	DEUP1_XENTR	CENTROSOMAL PROTEIN OF 63 KDA, TRANSCRIPT VARIANT X1; CENTROSOMAL PROTEIN OF 63 KDA, TRANSCRIPT VARIANT X2
2405	PORTHOMCL2405[AjBfCgDrGgLvMmOjOlPsSpXl|(20 genes, 12 taxa)]:	-0.241154	-0.773714	-0.599945	0.387206	0.218358	0.712265	0	0.013007	-0.844353	-0.809474	-0.639338	-0.764388	PPP4R1	PPP4R1L;PPP4R1	PPP4R1	PPP4R1.S;PPP4R1L.S;PPP4R1.L;PPP4R1	PROTEIN PHOSPHATASE 4 REGULATORY SUBUNIT 1	PPP4R1L;CABZ01104045.1			PP4R1_HUMAN;PPP4R1	PUTATIVE SERINE/THREONINE-PROTEIN PHOSPHATASE 4 REGULATORY SUBUNIT 1	PP4R1_HUMAN	SERINE/THREONINE-PROTEIN PHOSPHATASE 4 REGULATORY SUBUNIT 1;PPP4R1
6405	PORTHOMCL6405[AjBfCgCiDrGgLvMmOjOlPsSpXl|(13 genes, 13 taxa)]:	-0.697967	-0.91367	-0.775385	0.280294	-0.391691	0.0533824	-0.906468	0.387203	-0.872615	-0.689485	-0.729779	-0.76396	CENPI	CENPI	CENPI	CENPI.L;CENPI	CENPI	CENPI	CENTROMERE PROTEIN I-LIKE, TRANSCRIPT VARIANT X1; CENTROMERE PROTEIN I-LIKE, TRANSCRIPT VARIANT X2		CENPI_CHICK	PUTATIVE CENTROMERE PROTEIN I	CENPI_CHICK	CENTROMERE PROTEIN I
5610	PORTHOMCL5610[AjBfCgCiDrGgLvMmOjOlPsSpXl|(14 genes, 13 taxa)]:	-0.521813	-0.628484	-0.534835	-0.213186	-0.231936	-0.118824	-0.758117	-0.906583	-0.750971	-0.835273	-0.705515	-0.76392	EBNA1BP2	EBNA1BP2	EBNA1BP2	EBNA1BP2-A;EBNA1BP2	EBNA1BP2	EBNA1BP2	PROBABLE RRNA-PROCESSING PROTEIN EBP2;LOC100183007	EBNA1BP2	EBP2_MOUSE	PUTATIVE RRNA-PROCESSING PROTEIN EBP2;EBNA1BP2	EBP2_MOUSE;EBNA1BP2	PROBABLE RRNA-PROCESSING PROTEIN EBP2;EBNA1BP2
7979	PORTHOMCL7979[AjBfCiDrGgLvMmOjOlSpXl|(11 genes, 11 taxa)]:	-0.220714	0	-0.650824	-0.188309	0.16951	-0.346618	-0.65087	-0.487904	-0.780147	-0.800475	-0.710049	-0.763557	MMS19		MMS19	MMS19.L;MMS19	MMS19	MMS19	MMS19 NUCLEOTIDE EXCISION REPAIR PROTEIN HOMOLOG, TRANSCRIPT VARIANT X1; MMS19 NUCLEOTIDE EXCISION REPAIR PROTEIN HOMOLOG, TRANSCRIPT VARIANT X2;LOC100179544	MMS19	MMS19_XENTR	HYPOTHETICAL PROTEIN	MMS19_MOUSE	MMS19 NUCLEOTIDE EXCISION REPAIR PROTEIN HOMOLOG
3966	PORTHOMCL3966[AjBfCgCiDrGgLvMmOjOlPsSpXl|(16 genes, 13 taxa)]:	-0.735549	-0.807253	-0.530989	0.261887	0.0457598	0.497794	-0.795338	-0.0272128	-0.829324	-0.795748	-0.665441	-0.763504	SUZ12	SUZ12	SUZ12	SUZ12.S;LOC108701224;SUZ12	SUZ12B;SUZ12A	SUZ12B;SUZ12A;SUZ12	POLYCOMB PROTEIN SUZ12-A	SUZ12	SZ12A_DANRE;SUZ12	PUTATIVE POLYCOMB PROTEIN SUZ12-A	SZ12A_DANRE	POLYCOMB PROTEIN SUZ12-A
64	PORTHOMCL64[AjBfCgCiDrGgLvMmOjOlPsSpXl|(131 genes, 13 taxa)]:	0.28	0.412396	-0.200495	-0.0654412	0.674338	-0.148882	-0.393701	-0.887203	-0.885706	-0.811434	-0.593256	-0.763465	KLHL31;KLHL13;KLHL26;KLHL15;KLHL14;KLHL36;KLHL22;KLHL32	KLHL31;KLHL26;KLHL36;KLHL32;KLHL22;KLHL13;KLHL14	KLHL9;KLHL31;KLHL13;KLHL26;KLHL15;KLHL14;KLHL36;KLHL33;KLHL22;KLHL32	KLHL13.L;KLHL31.S;LOC108700169;KLHL14.L;KLHL31.L;KLHL36.L;KLHL26.S;KLHL14.S;KLHL32.L;KLHL13;KLHL14;KLHL31;KLHL36;KLHL32	KLHL13;KLHL31;KLHL26;KLHL14;KLHL43;SI:RP71-68N21.9;KLHL32;KLHL36;KLHL22;SI:CH211-63P21.8	KLHL13;KLHL31;SI:RP71-68N21.9;KLHL26;KLHL14;KLHL33;KLHL43;KLHL36;SI:CH211-63P21.8;KLHL32;KLHL22	KELCH-LIKE PROTEIN 9;KELCH-LIKE PROTEIN 9, TRANSCRIPT VARIANT X2; KELCH-LIKE PROTEIN 9, TRANSCRIPT VARIANT X1;KELCH-LIKE PROTEIN 13;KELCH-LIKE PROTEIN 9, TRANSCRIPT VARIANT X1; KELCH-LIKE PROTEIN 9, TRANSCRIPT VARIANT X2;KELCH-LIKE PROTEIN 14;KELCH-LIKE PROTEIN 15;KELCH-LIKE PROTEIN 13, TRANSCRIPT VARIANT X1; KELCH-LIKE PROTEIN 13, TRANSCRIPT VARIANT X2;LEUCINE-RICH REPEAT AND IMMUNOGLOBULIN-LIKE…	KLHL9;KLHL14;KLHL13	KLH13_CHICK;KLH26_HUMAN;KLH20_PONAB;KLH13_HUMAN;KLHL14	PUTATIVE KELCH-LIKE PROTEIN 14;PUTATIVE KELCH-LIKE PROTEIN 9;PUTATIVE KELCH-LIKE PROTEIN 22	KLH13_CHICK;KLHL9_MOUSE	KELCH-LIKE PROTEIN 14;KELCH-LIKE PROTEIN 9;KELCH-LIKE PROTEIN 22
3010	PORTHOMCL3010[AjBfCgDrGgLvMmOjOlPsSpXl|(18 genes, 12 taxa)]:	0.202912	0.835907	0.542619	-0.332208	-0.130611	-0.717199	0	-0.475062	-0.772294	-0.806068	-0.71201	-0.763457	G6PC;G6PC2	G6PC2	G6PC2;G6PC	LOC108702724;G6PC2.S;G6PC2.L;G6PC	G6PC2;G6PCA.2	G6PCA.2;G6PCB;G6PC		G6PC3	G6PC2_HUMAN;G6PC2	PUTATIVE GLUCOSE-6-PHOSPHATASE 2-LIKE;G6PC2	G6PC_HAPXE	GLUCOSE-6-PHOSPHATASE
6486	PORTHOMCL6486[AjBfCgCiDrLvMmOjOlSpXl|(13 genes, 11 taxa)]:	0	0	-0.503791	-0.180441	-0.0617157	0.00247059	-0.909429	-0.165951	-0.874735	-0.61257	-0.801961	-0.763089			PPAN	PPAN.S;PPAN.L;PPAN	PPAN	PPAN	PETER PAN HOMOLOG (DROSOPHILA);PPAN	PPAN	SSF1_MOUSE;PPAN	PUTATIVE SUPPRESSOR OF SWI4 1-LIKE;PPAN	SSF1_MOUSE	SUPPRESSOR OF SWI4 1 HOMOLOG;PPAN
4705	PORTHOMCL4705[AjBfCgCiDrGgLvMmOjOlPsSpXl|(15 genes, 13 taxa)]:	-0.456319	-0.554418	-0.790824	-0.0118873	-0.492034	-0.793059	-0.361429	0.38962	-0.820382	-0.707575	-0.760907	-0.762955			ALG10B	ALG10.S;ALG10.L	ALG10	ALG10	PUTATIVE DOL-P-GLC:GLC(2)MAN(9)GLCNAC(2)-PP-DOL ALPHA-1,2-GLUCOSYLTRANSFERASE, TRANSCRIPT VARIANT X1; PUTATIVE DOL-P-GLC:GLC(2)MAN(9)GLCNAC(2)-PP-DOL ALPHA-1,2-GLUCOSYLTRANSFERASE, TRANSCRIPT VARIANT X2		AG10B_MOUSE	PUTATIVE DOL-P-GLC:GLC(2)MAN(9)GLCNAC(2)-PP-DOL ALPHA-1,2-GLUCOSYLTRANSFERASE	AG10B_MOUSE	PUTATIVE DOL-P-GLC:GLC(2)MAN(9)GLCNAC(2)-PP-DOL ALPHA-1,2-GLUCOSYLTRANSFERASE
5976	PORTHOMCL5976[AjBfCgCiDrGgLvMmOjOlPsSpXl|(14 genes, 13 taxa)]:	-0.511813	-0.546725	-0.591593	0.427059	0.0415686	0.476471	-0.87187	-0.917762	-0.874206	-0.732735	-0.680637	-0.762526	PRPF38A	PRPF38A	PRPF38A	LOC108714318;PRPF38A.S;PRPF38A	PRPF38A	PRPF38A	PRE-MRNA-SPLICING FACTOR 38A-LIKE	PRPF38A	PR38A_PONAB;PRPF38A	PUTATIVE PRE-MRNA-SPLICING FACTOR 38A;PRPF38A	PR38A_PONAB;PRPF38A	PRE-MRNA-SPLICING FACTOR 38A;PRPF38A
4949	PORTHOMCL4949[AjBfCgCiDrGgLvMmOjOlPsSpXl|(15 genes, 13 taxa)]:	0.187802	-0.826549	-0.812747	0.0521565	-0.112589	0.632044	-0.313026	-0.770769	-0.684412	-0.807513	-0.794359	-0.762095	YTHDC2	YTHDC2	YTHDC2	YTHDC2.L;YTHDC2	YTHDC2	YTHDC2	PROBABLE ATP-DEPENDENT RNA HELICASE YTHDC2	YTHDC2	YTDC2_MOUSE;YTHDC2	PUTATIVE ATP-DEPENDENT RNA HELICASE YTHDC2;YTHDC2	YTDC2_MOUSE;YTHDC2	PROBABLE ATP-DEPENDENT RNA HELICASE YTHDC2;YTHDC2
2081	PORTHOMCL2081[AjBfCgCiDrGgLvMmOjOlPsSpXl|(21 genes, 13 taxa)]:	-0.66522	-0.906769	-0.673352	0.429828	0.0177696	0.714618	-0.825857	-0.0346154	-0.852588	-0.762456	-0.670343	-0.761796	RAD21;RAD21L1	RAD21;RAD21L1	RAD21;RAD21L;RAD21L1	RAD21.L;RAD21.S;RAD21	RAD21;RAD21L1	RAD21B;RAD21A;RAD21L1;RAD21	DOUBLE-STRAND-BREAK REPAIR PROTEIN RAD21 HOMOLOG	RAD21	RAD21_XENLA	PUTATIVE DOUBLE-STRAND-BREAK REPAIR PROTEIN RAD21-LIKE;RAD21	RAD21_BOVIN;RAD21	DOUBLE-STRAND-BREAK REPAIR PROTEIN RAD21 HOMOLOG;RAD21
4782	PORTHOMCL4782[AjBfCgCiDrGgLvMmOjOlPsSpXl|(15 genes, 13 taxa)]:	-0.559286	-0.659297	-0.550659	-0.145809	-0.0754657	-0.617206	-0.476026	0.383706	-0.819529	-0.646502	-0.819118	-0.761716	NUDCD1	NUDCD1	NUDCD1	NUDCD1.S;NUDCD1	NUDCD1	NUDCD1	NUDC DOMAIN-CONTAINING PROTEIN 1-LIKE;NUDCD1	NUDCD1	NUDC1_MOUSE;NUDCD1	PUTATIVE NUDC DOMAIN-CONTAINING PROTEIN 1 ISOFORM X2;NUDCD1	NUDC1_XENTR	NUDC DOMAIN-CONTAINING PROTEIN 1, TRANSCRIPT VARIANT X2; NUDC DOMAIN-CONTAINING PROTEIN 1, TRANSCRIPT VARIANT X1;NUDC DOMAIN-CONTAINING PROTEIN 1;NUDCD1
9166	PORTHOMCL9166[AjBfCgDrLvOjOlSpXl|(9 genes, 9 taxa)]:	0	0	0	0.183701	0.306201	0.614618	0	-0.0899162	-0.875029	-0.727162	-0.682404	-0.761532				LOC108719469	BMB	BMB			BMBL_DANRE;BMB	PUTATIVE PROTEIN BRAMBLEBERRY	BMBL_DANRE	PROTEIN BRAMBLEBERRY
3242	PORTHOMCL3242[AjBfCgCiDrGgLvMmOjOlPsSpXl|(17 genes, 13 taxa)]:	-0.361868	-0.729451	-0.572747	0.422377	0.0501471	0.725941	-0.925	0.132688	-0.802118	-0.710444	-0.771936	-0.761499	BUD31	BUD31	BUD31	BUD31.L;BUD31.S	BUD31	BUD31	PROTEIN BUD31 HOMOLOG			HYPOTHETICAL PROTEIN	BUD31_BRABE;BUD31_MOUSE	PROTEIN BUD31 HOMOLOG
3601	PORTHOMCL3601[AjCgCiDrGgLvMmOjOlPsSpXl|(17 genes, 12 taxa)]:	-0.349505	-0.893407	0	-0.290711	0.0103922	-0.0139412	-0.726364	0	-0.868912	-0.74937	-0.665196	-0.761159	CCNB3	CCNB1	CCNB3	CCNB3.S;CCNB3.L;CCNB3	CCNB3	CCNB3	G2/MITOTIC-SPECIFIC CYCLIN-B3;CCNB3		CCNB3_CHICK	CYCLIN B3;CCNB3	CCNB3_CHICK;CCA21_ARATH;CCNB3	G2/MITOTIC-SPECIFIC CYCLIN-B3;CYCLIN-A3-1
3595	PORTHOMCL3595[AjBfCgCiDrGgLvMmOjOlPsSpXl|(17 genes, 13 taxa)]:	-0.695769	-0.900967	-0.949725	-0.445588	-0.425858	0.0261765	-0.809078	-0.799345	-0.905176	-0.87676	-0.50098	-0.760972	BAZ1B	BAZ1B	BAZ1B	BAZ1B.L;LOC398269;BAZ1B	BAZ1B	BAZ1B	TYROSINE-PROTEIN KINASE BAZ1B, TRANSCRIPT VARIANT X1; TYROSINE-PROTEIN KINASE BAZ1B, TRANSCRIPT VARIANT X2; TYROSINE-PROTEIN KINASE BAZ1B, TRANSCRIPT VARIANT X4; TYROSINE-PROTEIN KINASE BAZ1B, TRANSCRIPT VARIANT X3;LOC100180873		BAZ1B_MOUSE	PUTATIVE TYROSINE-PROTEIN KINASE	BAZ1B_HUMAN	TYROSINE-PROTEIN KINASE BAZ1B
6194	PORTHOMCL6194[AjBfCgCiDrGgLvMmOjOlPsSpXl|(13 genes, 13 taxa)]:	-0.0625824	-0.273451	-0.558516	0.232353	-0.308162	-0.326853	-0.783325	-0.21258	-0.891912	-0.569948	-0.820466	-0.760775	EXOSC1	EXOSC1	EXOSC1	EXOSC1.L;EXOSC1	EXOSC1	EXOSC1	EXOSOME COMPLEX COMPONENT CSL4-LIKE;EXOSC1	EXOSC1	EXOS1_HUMAN	PUTATIVE EXOSOME COMPLEX COMPONENT CSL4-LIKE;EXOSC1	EXOS1_HUMAN	EXOSOME COMPLEX COMPONENT CSL4;EXOSC1
3829	PORTHOMCL3829[AjBfCgCiDrGgLvMmOjOlPsSpXl|(16 genes, 13 taxa)]:	-0.401209	-0.767604	0	-0.383627	0.100172	0.677824	-0.876195	-0.405035	-0.8995	-0.745346	-0.637132	-0.760659		DDI2	DDI1	DDI2.L;DDI2	DDI2	DDI2	PROTEIN DDI1 HOMOLOG 2-LIKE	DDI2	DDI2_DANRE	DDI1-LIKE PROTEIN 2;DDI2	DDI2_HUMAN;DDI2	PROTEIN DDI1 HOMOLOG 2
6772	PORTHOMCL6772[AjCgCiDrGgLvMmOjOlPsSpXl|(13 genes, 12 taxa)]:	-0.66478	-0.639341	-0.775769	0.427647	0.0397549	0.130559	-0.773545	0	-0.860176	-0.722951	-0.698407	-0.760512	NUDT21	NUDT21	NUDT21	NUDT21.L;NUDT21	NUDT21	NUDT21	CLEAVAGE AND POLYADENYLATION SPECIFICITY FACTOR SUBUNIT 5-LIKE;NUDT21		CPSF5_XENLA;NUDT21	PUTATIVE CLEAVAGE AND POLYADENYLATION SPECIFICITY FACTOR SUBUNIT 5;NUDT21	CPSF5_PONAB	CLEAVAGE AND POLYADENYLATION SPECIFICITY FACTOR SUBUNIT 5;CLEAVAGE AND POLYADENYLATION SPECIFICITY FACTOR SUBUNIT 5-LIKE;NUDT21
4044	PORTHOMCL4044[AjBfCgCiDrGgLvMmOjOlPsSpXl|(16 genes, 13 taxa)]:	-0.0226374	-0.303692	0.525385	0.266299	-0.35723	0.730588	-0.809922	0.357762	-0.918618	-0.72322	-0.639216	-0.760351	BLZF1	BLZF1	BLZF1	BLZF1.S;BLZF1.L;BLZF1	BLZF1	BLZF1	GOLGIN-45		GO45_HUMAN	PUTATIVE GOLGIN-45;BLZF1	GO45_HUMAN	GOLGIN-45;GOLGIN-45-LIKE;BLZF1
5303	PORTHOMCL5303[AjBfCgCiDrGgLvMmOjOlPsSpXl|(14 genes, 13 taxa)]:	-0.367143	-0.672264	-0.55489	0.148333	-0.00764706	-0.0945294	-0.821987	-0.0663804	-0.881382	-0.800929	-0.598093	-0.760135	SPOUT1	C9ORF114;SPOUT1	SPOUT1	C9ORF114.L;SPOUT1	SPOUT1	SPOUT1	PUTATIVE METHYLTRANSFERASE C9ORF114;SPOUT1	SPOUT1	CI114_HUMAN;SPOUT1	HYPOTHETICAL PROTEIN;SPOUT1	CI114_MOUSE	PUTATIVE METHYLTRANSFERASE C9ORF114;SPOUT1
10838	PORTHOMCL10838[AjBfLvOjSp|(7 genes, 5 taxa)]:	0	0	0	0	0	0	0	0.52035	-0.855382	-0.748318	-0.675858	-0.759853									F124B_HUMAN	HYPOTHETICAL PROTEIN		UNCHARACTERIZED LOC100889127
6295	PORTHOMCL6295[AjBfCiDrGgLvMmOjOlPsSpXl|(13 genes, 12 taxa)]:	-0.491593	-0.626857	-0.555659	0.350466	-0.622623	0.626441	-0.809688	0.451399	-0.805706	-0.762477	-0.710172	-0.759451	PHF5A	PHF5A	PHF5A	PHF5A.S;PHF5A.L;PHF5A	PHF5A	PHF5A	PHD FINGER-LIKE DOMAIN-CONTAINING PROTEIN 5A, TRANSCRIPT VARIANT X3; PHD FINGER-LIKE DOMAIN-CONTAINING PROTEIN 5A, TRANSCRIPT VARIANT X1;PHF5A	PHF5A	PHF5A_RAT;PHF5A	PUTATIVE PHD FINGER-LIKE DOMAIN-CONTAINING PROTEIN 5A;PHF5A	PHF5A_RAT	PHD FINGER-LIKE DOMAIN-CONTAINING PROTEIN 5A;PHF5A
3297	PORTHOMCL3297[AjBfCgCiDrGgLvMmOjOlPsSpXl|(17 genes, 13 taxa)]:	0.341978	-0.434242	-0.642033	0.363333	0.389657	0.000705882	-0.873039	0.437902	-0.884765	-0.769412	-0.623897	-0.759358	PPM1D	PPM1D	PPM1D	PPM1D;PPM1D.L	PPM1DA;PROTEIN PHOSPHATASE 1D;PPM1DB	PPM1DB;PPM1DA	PROTEIN PHOSPHATASE 1D, TRANSCRIPT VARIANT X2; PROTEIN PHOSPHATASE 1D, TRANSCRIPT VARIANT X1		PPM1D_HUMAN	HYPOTHETICAL PROTEIN	PPM1D_MOUSE	PROBABLE PROTEIN PHOSPHATASE 2C 64
254	PORTHOMCL254[AjBfCgCiDrGgLvMmOjOlPsSpXl|(65 genes, 13 taxa)]:	-0.425275	-0.959385	-0.782802	0.111846	0.231765	0.714118	-0.914403	0.0727972	-0.848142	-0.745993	-0.683211	-0.759115	PIF1	PIF1	PIF1	LOC108718517;PIF1.L;LOC108704229;LOC108706568;PIF1	UNCHARACTERIZED LOC105356481;PIF1	PIF1	ATP-DEPENDENT DNA HELICASE PIF1-LIKE;PIF1		PIF1_CAMJE;PIF1_XENLA;PIF1_DANRE;PIF1_CANAL	HYPOTHETICAL PROTEIN;PIF1 5'-TO-3' DNA HELICASE;PUTATIVE COILED-COIL DOMAIN-CONTAINING PROTEIN;PIF1	PIF1_XENLA;PIF1_EMENI;PIF1_DANRE;PIF1	UNCHARACTERIZED LOC100888266;ATP-DEPENDENT DNA HELICASE PIF1;UNCHARACTERIZED LOC100890415;ATP-DEPENDENT DNA HELICASE PIF1-LIKE;ATP-DEPENDENT DNA HELICASE PIF1-LIKE, TRANSCRIPT VARIANT X1; ATP-DEPENDENT DNA HELICASE PIF1-LIKE, TRANSCRIPT VARIANT X2;UNCHARACTERIZED LOC100888299;PIF1
5203	PORTHOMCL5203[AjBfCgDrGgLvMmOjOlPsSpXl|(14 genes, 12 taxa)]:	0.340375	0.0578901	0	0.47002	0.357584	0.709636	0	-0.83552	-0.811912	-0.784231	-0.679779	-0.758641		EXD1	EXD1	EXD1.L;EXD1	EXONUCLEASE 3'-5' DOMAIN CONTAINING 1;EXD1	EXD1			EXD1_MOUSE	PUTATIVE EXONUCLEASE 3'-5' DOMAIN-CONTAINING PROTEIN 1	EXD1_XENLA	EXONUCLEASE 3'-5' DOMAIN-CONTAINING PROTEIN 1
3376	PORTHOMCL3376[AjBfCiDrGgLvMmOjOlPsSpXl|(17 genes, 12 taxa)]:	0.216264	-0.684308	-0.356758	-0.041348	-0.590123	-0.132706	-0.847299	-0.183127	-0.860294	-0.886027	-0.529289	-0.758537	EPN2	EPN2	EPN2	MGC81482;EPN1.S;EPN2.S;EPN2;EPN1	EPN2	EPN2;EPN3B	EPSIN-2;EPN2	EPN2	EPN2_RAT;EPN2_HUMAN	PUTATIVE EPSIN-2	EPN2_RAT;EPN2_HUMAN;EPN2	EPSIN-2, TRANSCRIPT VARIANT X1; EPSIN-2, TRANSCRIPT VARIANT X2;EPN2
1642	PORTHOMCL1642[AjBfCgCiDrGgLvMmOjOlPsSpXl|(23 genes, 13 taxa)]:	-0.520165	-0.948	-0.527363	0.453824	0.111176	0.716647	-0.901221	0	-0.871853	-0.756202	-0.646936	-0.75833	CCNA1;CCNA2	CCNA1;CCNA2	CCNA1;CCNA2	CCNA1.S;CCNA2.S;CCNA1.L;CCNA2.L;CCNA2	CCNA2;CCNA1	CCNA2;CCNA1	CYCLIN-A2, TRANSCRIPT VARIANT X1; CYCLIN-A2, TRANSCRIPT VARIANT X2; CYCLIN-A2, TRANSCRIPT VARIANT X3;G2/MITOTIC-SPECIFIC CYCLIN-A-LIKE, TRANSCRIPT VARIANT X2; G2/MITOTIC-SPECIFIC CYCLIN-A-LIKE, TRANSCRIPT VARIANT X1;LOC100187071			CYCLIN A;CYCLIN DOMAIN CONTAINING PROTEIN	CCNA_PATVU	CYCLIN A
1295	PORTHOMCL1295[AjBfCgCiDrGgLvMmOjOlPsSpXl|(26 genes, 13 taxa)]:	0.403187	0.129677	-0.618462	0.33348	-0.285049	0.650382	-0.804039	0.85028	-0.904706	-0.661651	-0.708211	-0.758189	PRMT8	PRMT8	PRMT1;PRMT8	PRMT1.S;PRMT1.L;PRMT8.S;PRMT1;PRMT8	PRMT1;PRMT8;PROTEIN ARGININE N-METHYLTRANSFERASE 8-B	PRMT1;PRMT8B;PRMT8 (1 OF MANY);PRMT8	PROTEIN ARGININE N-METHYLTRANSFERASE 1-LIKE;PRMT1	PRMT1;PRMT8;ART1	ANM1_HUMAN;PRMT1	HYPOTHETICAL PROTEIN;PROTEIN ARGININE N-METHYLTRANSFERASE 1-LIKE;PROTEIN ARGININE N-METHYLTRANSFERASE 1	ANM1_XENTR;PRMT1	PROTEIN ARGININE N-METHYLTRANSFERASE 1;PRMT1
2663	PORTHOMCL2663[AjBfCgCiDrGgLvMmOjOlPsSpXl|(19 genes, 13 taxa)]:	-0.0931868	-0.843824	-0.631154	0.389681	-0.510564	0.495971	-0.87987	0.74993	-0.928588	-0.75065	-0.594363	-0.757867	AMMECR1L;AMMECR1	AMMECR1L;AMMECR1	AMMECR1L;AMMECR1	AMMECR1L.L;AMMECR1.S;AMMECR1.L;AMMECR1	AMMECR1	AMMECR1	UNCHARACTERIZED PROTEIN CG5902;AMMECR1	AMMECR1	AMERL_PONAB	PUTATIVE AMMECR1-LIKE PROTEIN	AMMR1_PONAB	AMMECR1-LIKE PROTEIN;AMMECR1
12088	PORTHOMCL12088[AjCgLvOjSpXl|(6 genes, 6 taxa)]:	0	0	0	0.249608	0	0	0	0	-0.867853	-0.762559	-0.643137	-0.75785				MLLT6.S					AF10_MOUSE	HYPOTHETICAL PROTEIN	AF10_MOUSE	PROTEIN AF-10, TRANSCRIPT VARIANT X4; PROTEIN AF-10, TRANSCRIPT VARIANT X2; PROTEIN AF-10, TRANSCRIPT VARIANT X3; PROTEIN AF-10, TRANSCRIPT VARIANT X1
5842	PORTHOMCL5842[AjBfCgCiDrGgLvMmOjOlPsSpXl|(14 genes, 13 taxa)]:	-0.443077	-0.770418	-0.551648	-0.821961	-0.435588	0.720088	-0.642117	-0.437807	-0.815471	-0.680949	-0.776348	-0.757589	SUPV3L1	SUPV3L1	SUPV3L1	SUPV3L1.S;SUPV3L1	SUPV3L1	SUPV3L1	ATP-DEPENDENT RNA HELICASE SUPV3L1, MITOCHONDRIAL	SUPV3L1	SUV3_DANRE;SUPV3L1	PUTATIVE ATP-DEPENDENT RNA HELICASE SUPV3L1, MITOCHONDRIAL ISOFORM X2	SUV3_CHICK;SUPV3L1	ATP-DEPENDENT RNA HELICASE SUPV3L1, MITOCHONDRIAL, TRANSCRIPT VARIANT X1; ATP-DEPENDENT RNA HELICASE SUPV3L1, MITOCHONDRIAL, TRANSCRIPT VARIANT X3; ATP-DEPENDENT RNA HELICASE SUPV3L1, MITOCHONDRIAL, TRANSCRIPT VARIANT X4; ATP-DEPENDENT RNA HELICASE SUPV3L1, MITOCHONDRIAL, TRANSCRIPT VARIANT X5;SUPV3L1
7604	PORTHOMCL7604[AjBfCiDrGgLvMmOjOlPsSpXl|(12 genes, 12 taxa)]:	-0.378626	-0.676044	0.888407	0.285098	0.242451	0.248647	-0.872286	-0.350541	-0.8625	-0.765139	-0.642525	-0.756721	PWWP2B	PWWP2B	PWWP2B	PWWP2B.S;PWWP2B	PWWP2B	PWWP2B	PWWP DOMAIN-CONTAINING PROTEIN 2A		PWP2A_HUMAN	PUTATIVE PWWP DOMAIN-CONTAINING PROTEIN 2A ISOFORM X1	PWP2B_HUMAN	PWWP DOMAIN-CONTAINING PROTEIN 2A, TRANSCRIPT VARIANT X3; PWWP DOMAIN-CONTAINING PROTEIN 2A, TRANSCRIPT VARIANT X1; PWWP DOMAIN-CONTAINING PROTEIN 2A, TRANSCRIPT VARIANT X2
3909	PORTHOMCL3909[AjBfCgCiDrGgLvMmOjOlPsSpXl|(16 genes, 13 taxa)]:	-0.0556044	-0.526945	-0.566923	0.0546814	0.196863	0.0299412	-0.487377	0.216224	-0.7685	-0.85709	-0.644485	-0.756692	GLYR1	GLYR1	GLYR1	LOC108703250;GLYR1.L;GLYR1	GLYR1	GLYR1	GLYOXYLATE/SUCCINIC SEMIALDEHYDE REDUCTASE 1, TRANSCRIPT VARIANT X1; GLYOXYLATE/SUCCINIC SEMIALDEHYDE REDUCTASE 1, TRANSCRIPT VARIANT X2;GLYR1		GLYR1_RAT	PUTATIVE OXIDOREDUCTASE GLYR1 ISOFORM X2;GLYR1	GLYR1_ARATH	GLYOXYLATE/SUCCINIC SEMIALDEHYDE REDUCTASE 1-LIKE;GLYOXYLATE/SUCCINIC SEMIALDEHYDE REDUCTASE 1
4951	PORTHOMCL4951[AjBfCgCiDrGgLvMmOjOlPsSpXl|(15 genes, 13 taxa)]:	-0.357418	-0.574769	-0.531758	-0.0124265	-0.350294	-0.258324	-0.0160909	-0.45875	-0.852353	-0.754964	-0.661642	-0.75632	PPAT	PPAT	PPAT	PPAT.S;PPAT.L;PPAT	PPAT	PPAT	AMIDOPHOSPHORIBOSYLTRANSFERASE-LIKE, TRANSCRIPT VARIANT X1; AMIDOPHOSPHORIBOSYLTRANSFERASE-LIKE, TRANSCRIPT VARIANT X2;PPAT	PPAT	PUR1_CHICK;PUR1_HUMAN;PPAT	PUTATIVE AMIDOPHOSPHORIBOSYLTRANSFERASE	ATP7B_MOUSE	AMIDOPHOSPHORIBOSYLTRANSFERASE;PPAT
5535	PORTHOMCL5535[AjBfCgCiDrGgLvMmOjOlPsSpXl|(14 genes, 13 taxa)]:	0.601648	0.151033	0.261429	0.072598	0.246618	0.479471	-0.78713	-0.383217	-0.784029	-0.839257	-0.64473	-0.756006	GOLGA2		GOLGA2	GOLGA2.S;GOLGA2	GOLGA2	GOLGA2	GOLGIN SUBFAMILY A MEMBER 2;GOLGIN SUBFAMILY A MEMBER 2-LIKE		GOGA2_RAT	PUTATIVE GOLGIN SUBFAMILY A MEMBER 2	GOGA2_HUMAN	GOLGIN SUBFAMILY A MEMBER 2;LOC106156233
6371	PORTHOMCL6371[AjBfCiDrGgLvMmOjOlPsSpXl|(13 genes, 12 taxa)]:	0.224451	-0.758857	-0.584341	0.252108	0.119583	0.132765	-0.449662	0.75758	-0.762735	-0.735831	-0.768137	-0.755568	MINDY3	FAM188A;MINDY3	FAM188A;MINDY3	FAM188A.S;MINDY3	MINDY3	FAM188A;MINDY3	UBIQUITIN CARBOXYL-TERMINAL HYDROLASE FAM188A, TRANSCRIPT VARIANT X2; UBIQUITIN CARBOXYL-TERMINAL HYDROLASE FAM188A, TRANSCRIPT VARIANT X1; UBIQUITIN CARBOXYL-TERMINAL HYDROLASE FAM188A, TRANSCRIPT VARIANT X3;MINDY3	MINDY3	F188A_DANRE;MINDY3	HYPOTHETICAL PROTEIN	F188A_MACFA;MINDY3	PROTEIN FAM188A;MINDY3
3960	PORTHOMCL3960[AjBfCgCiDrGgLvMmOjOlSpXl|(16 genes, 12 taxa)]:	-0.0975824	0	-0.746319	-0.791373	-0.346005	-0.636	-0.882416	-0.326314	-0.737324	-0.815253	-0.712745	-0.755107	C12ORF10		MYG1	C12ORF10.L;C12ORF10.S	MYG1	MYG1	UPF0160 PROTEIN C27H6.8-LIKE, TRANSCRIPT VARIANT X2; UPF0160 PROTEIN C27H6.8-LIKE, TRANSCRIPT VARIANT X1		MYG1_BOVIN	PUTATIVE UPF0160 PROTEIN MYG1, MITOCHONDRIAL ISOFORM X2;PUTATIVE UPF0160 PROTEIN MYG1, MITOCHONDRIAL	MYG1_MOUSE	UPF0160 PROTEIN MYG1, MITOCHONDRIAL
5840	PORTHOMCL5840[AjBfCgCiDrGgLvMmOjOlPsSpXl|(14 genes, 13 taxa)]:	-0.481044	-0.875341	-0.600604	-0.788431	-0.662696	0.266735	-0.868948	0.594196	-0.642206	-0.813746	-0.808701	-0.754884	MRPS22	MRPS22	MRPS22	LOC108716228;MRPS22	MRPS22	MRPS22	28S RIBOSOMAL PROTEIN S22, MITOCHONDRIAL-LIKE;MRPS22	MRPS22	RT22_MOUSE;MRPS22	PUTATIVE 28S RIBOSOMAL PROTEIN S22, MITOCHONDRIAL;MRPS22	RT22_BOVIN;MRPS22	28S RIBOSOMAL PROTEIN S22, MITOCHONDRIAL;MRPS22
2466	PORTHOMCL2466[AjBfCgCiDrGgLvMmOjOlPsSpXl|(19 genes, 13 taxa)]:	-0.118791	-0.81178	-0.580495	-0.104044	0.0614706	0.102	-0.791	0.0573427	-0.766676	-0.821039	-0.676885	-0.754867	SRBD1	SRBD1	SRBD1	SRBD1.L;SRBD1	SI:CH211-117N7.8;SRBD1	SRBD1	S1 RNA-BINDING DOMAIN-CONTAINING PROTEIN 1-LIKE;SRBD1	SRBD1	SRBD1_HUMAN;SRBD1	PUTATIVE S1 RNA-BINDING DOMAIN-CONTAINING PROTEIN 1;PUTATIVE TRANSCRIPTION ELONGATION FACTOR SPT6	SRBD1_HUMAN	S1 RNA-BINDING DOMAIN-CONTAINING PROTEIN 1;S1 RNA-BINDING DOMAIN-CONTAINING PROTEIN 1-LIKE;SRBD1
6466	PORTHOMCL6466[AjBfCgDrGgLvMmOjOlPsSpXl|(13 genes, 12 taxa)]:	0.10478	-0.491648	-0.576484	0.390613	-0.410441	0.306412	0	0.80007	-0.838206	-0.767492	-0.658824	-0.754841	SNRNP25	SNRNP25	SNRNP25	SNRNP25.S;SNRNP25	SNRNP25	SNRNP25		SNRNP25	SNR25_HUMAN;SNRNP25	PUTATIVE U11/U12 SMALL NUCLEAR RIBONUCLEOPROTEIN 25 KDA PROTEIN	SNR25_HUMAN;SNRNP25	U11/U12 SMALL NUCLEAR RIBONUCLEOPROTEIN 25 KDA PROTEIN, TRANSCRIPT VARIANT X3; U11/U12 SMALL NUCLEAR RIBONUCLEOPROTEIN 25 KDA PROTEIN, TRANSCRIPT VARIANT X1; U11/U12 SMALL NUCLEAR RIBONUCLEOPROTEIN 25 KDA PROTEIN, TRANSCRIPT VARIANT X2;U11/U12 SMALL NUCLEAR RIBONUCLEOPROTEIN 25 KDA PROTEIN, TRANSCRIPT VARIANT X3; U11/U12 SMALL NUCLEAR RIBONUCLEOPROTEIN 25 KDA PROTEIN, TRANSCRIPT VARIANT X5; U11/U…
3836	PORTHOMCL3836[AjBfCgCiDrGgLvMmOjOlPsSpXl|(16 genes, 13 taxa)]:	-0.719231	-0.724044	-0.569286	-0.470123	0.0191176	0.335353	-0.505104	0.161608	-0.804912	-0.809556	-0.649877	-0.754782	KIF14	KIF14	KIF14	LOC108714439;KIF14	KIF14	KIF14	KINESIN-LIKE PROTEIN KIF14, TRANSCRIPT VARIANT X2; KINESIN-LIKE PROTEIN KIF14, TRANSCRIPT VARIANT X1;KIF14		KIF14_HUMAN	PUTATIVE KINESIN-LIKE PROTEIN KIF14 ISOFORM X3	KIF14_HUMAN;KIF14	KINESIN-LIKE PROTEIN KIF14, TRANSCRIPT VARIANT X2; KINESIN-LIKE PROTEIN KIF14, TRANSCRIPT VARIANT X3; KINESIN-LIKE PROTEIN KIF14, TRANSCRIPT VARIANT X1;KINESIN-LIKE PROTEIN KIF14
2173	PORTHOMCL2173[AjBfCgCiDrLvMmOjOlPsSpXl|(20 genes, 12 taxa)]:	0	0.160352	-0.336978	0.616618	0.141152	0.454588	-0.863052	0.0202752	-0.809765	-0.750877	-0.702451	-0.754364		MUS81	MUS81	MUS81.L;MUS81	MUS81	MUS81	CROSSOVER JUNCTION ENDONUCLEASE MUS81-LIKE	MUS81	MUS81_DANRE;MUS81_XENTR	PUTATIVE CROSSOVER JUNCTION ENDONUCLEASE MUS81;MUS81	MUS81_XENTR	CROSSOVER JUNCTION ENDONUCLEASE MUS81
4523	PORTHOMCL4523[AjBfCgCiDrGgLvMmOjOlPsSpXl|(15 genes, 13 taxa)]:	-0.516099	-0.56778	-0.552747	-0.164534	-0.20473	0.417029	-0.742714	0.110571	-0.770412	-0.711662	-0.781005	-0.754359	BRIX1	BRIX1	BRIX1	BRIX1.L;BRIX1.S;BRIX1	BXDC2;BRIX1	BXDC2	RIBOSOME BIOGENESIS PROTEIN BRX1 HOMOLOG, TRANSCRIPT VARIANT X1; RIBOSOME BIOGENESIS PROTEIN BRX1 HOMOLOG, TRANSCRIPT VARIANT X2;BRIX1	BRIX1	BRX1_BOVIN	PUTATIVE RIBOSOME BIOGENESIS PROTEIN BRX1-LIKE ISOFORM X2;BRIX1	BRX1_BOVIN;BRX1_RAT	RIBOSOME BIOGENESIS PROTEIN BRX1 HOMOLOG, TRANSCRIPT VARIANT X1; RIBOSOME BIOGENESIS PROTEIN BRX1 HOMOLOG, TRANSCRIPT VARIANT X2;BRIX1
4194	PORTHOMCL4194[AjBfCgCiDrGgLvMmOjOlPsSpXl|(16 genes, 13 taxa)]:	-0.478022	-0.908703	-0.546868	0.436887	-0.106887	0.719706	-0.346974	-0.803189	-0.832588	-0.768504	-0.661642	-0.754245	NEK2	NEK2	NEK2	NEK2.S;NEK2	NEK2	NEK2	SERINE/THREONINE-PROTEIN KINASE NEK2, TRANSCRIPT VARIANT X2; SERINE/THREONINE-PROTEIN KINASE NEK2, TRANSCRIPT VARIANT X1;NEK2	NEK2	NEK2_HUMAN;PDK1L_HUMAN;NEK2	PUTATIVE SERINE/THREONINE-PROTEIN KINASE NEK2;NEK2	NEK2_HUMAN;NEK2	SERINE/THREONINE-PROTEIN KINASE NEK2;NEK2
3404	PORTHOMCL3404[AjBfCgCiDrGgLvMmOjOlPsSpXl|(17 genes, 13 taxa)]:	-0.0669231	-0.137055	-0.712143	0.382623	0.0751471	0.701971	-0.930078	-0.706503	-0.784235	-0.769185	-0.708211	-0.753877	PAN3	PAN3	PAN3	LOC108708701;PAN3.S;PAN3	PAN3	PAN3	PAB-DEPENDENT POLY(A)-SPECIFIC RIBONUCLEASE SUBUNIT PAN3-LIKE;PAN3	PAN3	PAN3_XENTR;PAN3	PUTATIVE PAB-DEPENDENT POLY(A)-SPECIFIC RIBONUCLEASE SUBUNIT PAN3-LIKE;PAN3	PAN3_MOUSE	PAB-DEPENDENT POLY(A)-SPECIFIC RIBONUCLEASE SUBUNIT PAN3-LIKE;PAN3
8027	PORTHOMCL8027[AjBfCgCiLvMmOjPsSpXl|(11 genes, 10 taxa)]:	0	-0.712044	-0.63989	-0.0112255	0	0	-0.880727	0.70622	-0.637471	-0.740947	-0.882574	-0.753664		CCDC138	CCDC138	CCDC138.L;CCDC138			COILED-COIL DOMAIN-CONTAINING PROTEIN 138;CCDC138	CCDC138	CC138_MOUSE;LOC106158190	PUTATIVE COILED-COIL DOMAIN-CONTAINING PROTEIN;CCDC138	CC138_MOUSE	COILED-COIL DOMAIN-CONTAINING PROTEIN 138;CCDC138
3185	PORTHOMCL3185[AjBfCgCiDrGgLvMmOjOlPsSpXl|(17 genes, 13 taxa)]:	-0.491264	-0.894901	-0.848352	0.226765	-0.148431	0.472471	-0.394091	0.486154	-0.866588	-0.765855	-0.625309	-0.752584	POC5	POC5	POC5	POC5.L;POC5	POC5	POC5	CENTROSOMAL PROTEIN POC5;POC5		POC5_MOUSE	PUTATIVE CENTROSOMAL PROTEIN	POC5_MOUSE;POC5_RAT;POC5	CENTROSOMAL PROTEIN POC5
5858	PORTHOMCL5858[AjCgCiDrGgLvMmOjOlPsSpXl|(14 genes, 12 taxa)]:	-0.330714	-0.717055	-0.577802	0.372132	0.0379902	0.719206	-0.805701	0	-0.801176	-0.778349	-0.678186	-0.752571	PRPF19	PRPF19	PRPF19	LOC108697536	PRPF19	PRP19;PRPF19	PRE-MRNA-PROCESSING FACTOR 19-LIKE;PRPF19		PRP19_HUMAN	PUTATIVE PRE-MRNA-PROCESSING FACTOR 19;PRPF19	PRP19_HUMAN;PRPF19	PRE-MRNA-PROCESSING FACTOR 19
5362	PORTHOMCL5362[AjBfCgDrGgLvMmOjOlPsSpXl|(14 genes, 12 taxa)]:	-0.600055	-0.80844	-0.596209	-0.0599265	0.0479167	0.714382	0	-0.364449	-0.848029	-0.767802	-0.641789	-0.75254	UBP;SSB	SSB	SSB	SSB.L;SSB.S;SSB	SSB	SSB		SSB	LA_HUMAN	PUTATIVE LUPUS LA PROTEIN-LIKE ISOFORM X2;SSB	LA_BOVIN;SSB	LUPUS LA PROTEIN HOMOLOG B-LIKE
3946	PORTHOMCL3946[AjBfCgCiDrGgLvMmOjOlPsSpXl|(16 genes, 13 taxa)]:	0.0636264	-0.464352	-0.922582	-0.0919853	-0.685368	-0.669559	-0.70061	-0.850813	-0.754088	-0.731909	-0.770816	-0.752271	WDR6	WDR6	WDR6	WDR6.L;WDR6	WDR6	WDR6	WD REPEAT-CONTAINING PROTEIN 6-LIKE		WDR6_RAT	PUTATIVE WD REPEAT-CONTAINING PROTEIN 6-LIKE ISOFORM X2;PUTATIVE WD REPEAT-CONTAINING PROTEIN 6-LIKE	WDR6_MOUSE	WD REPEAT-CONTAINING PROTEIN 6
2255	PORTHOMCL2255[AjBfCgCiDrGgLvMmOjOlPsSpXl|(20 genes, 13 taxa)]:	-0.345934	-0.286813	-0.838297	-0.265074	0.100221	0.546176	-0.893896	-0.425315	-0.886765	-0.692652	-0.676593	-0.752003	KDM2A;KDM2B	KDM2A	KDM2A	LOC108697539;KDM2A.L;KDM2A	KDM2AB;KDM2AA	KDM2AA;KDM2AB;KDM2BB	ZINC FINGER PROTEIN; ZINC FINGER PROTEIN, TRANSCRIPT VARIANT X1	KDM2A	KDM2A_HUMAN;KDM2A	PUTATIVE LYSINE-SPECIFIC DEMETHYLASE 2B ISOFORM X1;PUTATIVE LYSINE-SPECIFIC DEMETHYLASE 2B ISOFORM X3	KDM2A_XENTR	LYSINE-SPECIFIC DEMETHYLASE 2B, TRANSCRIPT VARIANT X1; LYSINE-SPECIFIC DEMETHYLASE 2B, TRANSCRIPT VARIANT X3; LYSINE-SPECIFIC DEMETHYLASE 2B, TRANSCRIPT VARIANT X2
3180	PORTHOMCL3180[AjBfCgCiDrGgLvMmOjOlPsSpXl|(17 genes, 13 taxa)]:	-0.56022	-0.770725	0.853352	-0.00281863	0.571005	-0.705088	-0.90661	-0.896133	-0.862735	-0.845428	-0.547549	-0.751904	LPCAT3	LPCAT3	LPCAT3	LPCAT3.S;LPCAT3.L;LPCAT3	LPCAT3	LPCAT3	LYSOPHOSPHOLIPID ACYLTRANSFERASE 5, TRANSCRIPT VARIANT X1; LYSOPHOSPHOLIPID ACYLTRANSFERASE 5, TRANSCRIPT VARIANT X2;LPCAT3	LPCAT3	MBOA5_MOUSE;LPCAT3	LYSOPHOSPHOLIPID ACYLTRANSFERASE 5	MBOA5_BOVIN;MBOA5_RAT;LPCAT3	LYSOPHOSPHOLIPID ACYLTRANSFERASE 5;LYSOPHOSPHOLIPID ACYLTRANSFERASE 5, TRANSCRIPT VARIANT X1; LYSOPHOSPHOLIPID ACYLTRANSFERASE 5, TRANSCRIPT VARIANT X2;LPCAT3
3379	PORTHOMCL3379[AjBfCgDrGgLvMmOjOlPsSpXl|(17 genes, 12 taxa)]:	-0.609231	-0.945714	-0.581593	0.347475	0.058848	0.528235	0	0.854825	-0.843882	-0.780764	-0.630534	-0.751727	PARPBP	PARPBP	PARPBP	PARPBP.S;PARPBP	PARPBP	PARPBP			PARI_MOUSE	PUTATIVE PCNA-INTERACTING PARTNER-LIKE;UPF0419 PROTEIN C12ORF48-LIKE PROTEIN	PARI_BOVIN	PCNA-INTERACTING PARTNER;UNCHARACTERIZED LOC752321;PCNA-INTERACTING PARTNER-LIKE
650	PORTHOMCL650[AjBfCgCiDrGgLvMmOjOlPsSpXl|(36 genes, 13 taxa)]:	0.659725	-0.576747	-0.260165	0.31201	0.715074	0.625147	-0.0625584	0.267832	-0.880294	-0.638246	-0.736275	-0.751605	TM9SF4;TM9SF2	TM9SF4;ABCA13	TM9SF4;ABCA13	TM9SF4.L;TM9SF4.S;TM9SF4	TM9SF4;ABCA1A	TM9SF4;SI:CH211-127L15.5	TRANSMEMBRANE 9 SUPERFAMILY MEMBER 4, TRANSCRIPT VARIANT X1; TRANSMEMBRANE 9 SUPERFAMILY MEMBER 4, TRANSCRIPT VARIANT X2		TM9S4_HUMAN	HYPOTHETICAL PROTEIN;PUTATIVE TRANSMEMBRANE 9 SUPERFAMILY MEMBER 4-LIKE;PUTATIVE TRANSMEMBRANE 9 SUPERFAMILY MEMBER 2;PUTATIVE ATP-BINDING CASSETTE SUB-FAMILY A MEMBER 2-LIKE;CNIH2	TM9S4_HUMAN	TRANSMEMBRANE 9 SUPERFAMILY MEMBER 4;UNCHARACTERIZED LOC100890089;UNCHARACTERIZED LOC100889824
2195	PORTHOMCL2195[AjBfCgCiDrGgLvMmOjOlPsSpXl|(20 genes, 13 taxa)]:	-0.636044	-0.566813	-0.614286	0.234093	-0.486593	-0.417618	-0.655558	-0.803636	-0.712912	-0.784438	-0.756714	-0.751354	RPAP1	RPAP1	RPAP1	RPAP1.L;RPAP1.S;RPAP1	RPAP1	RPAP1	RNA POLYMERASE II-ASSOCIATED PROTEIN 1-LIKE, TRANSCRIPT VARIANT X1; RNA POLYMERASE II-ASSOCIATED PROTEIN 1-LIKE, TRANSCRIPT VARIANT X2	RPAP1	RPAP1_HUMAN	PUTATIVE RNA POLYMERASE II-ASSOCIATED PROTEIN 1;PUTATIVE RNA POLYMERASE II-ASSOCIATED PROTEIN 1-LIKE	RPAP1_HUMAN	RNA POLYMERASE II-ASSOCIATED PROTEIN 1
4048	PORTHOMCL4048[AjBfCgDrGgLvMmOjOlPsSpXl|(16 genes, 12 taxa)]:	0.162198	-0.893495	-0.415714	-0.574635	0.238725	0.0648235	0	0.394755	-0.885471	-0.757585	-0.610907	-0.751321	RTKN2;RTKN	RTKN2	RTKN	LOC108704872;RTKN	SI:DKEY-40C11.1;RTKN2B;RTKN	RTKN;RTKN2B		RTKN2	RTKN2_HUMAN;RTKN	PUTATIVE RHOTEKIN ISOFORM X3;PUTATIVE RHOTEKIN ISOFORM X4	RTKN_RAT;RTKN	RHOTEKIN, TRANSCRIPT VARIANT X1; RHOTEKIN, TRANSCRIPT VARIANT X3; RHOTEKIN, TRANSCRIPT VARIANT X2; RHOTEKIN, TRANSCRIPT VARIANT X4;RTKN
3283	PORTHOMCL3283[AjBfCgCiDrGgLvMmOjOlPsSpXl|(17 genes, 13 taxa)]:	-0.329341	-0.608923	-0.551429	-0.273578	-0.45027	-0.303206	-0.439935	-0.113566	-0.867647	-0.677853	-0.707598	-0.751033	DDX54	DDX54	DDX54	DDX54.L	DDX54	DDX54	ATP-DEPENDENT RNA HELICASE DDX54, TRANSCRIPT VARIANT X2;DDX54	DDX54;DDX27	DDX54_MOUSE;DDX54	PUTATIVE ATP-DEPENDENT RNA HELICASE DDX54;DDX54	DDX54_MOUSE;DDX54	ATP-DEPENDENT RNA HELICASE DDX54;DDX54
2818	PORTHOMCL2818[AjBfCgCiDrGgLvMmOjOlPsSpXl|(18 genes, 13 taxa)]:	0.118846	0.555868	0.552033	-0.0189461	-0.449338	-0.706441	-0.764169	-0.780993	-0.669471	-0.924272	-0.659191	-0.750978		PC	PCX;PC	PC.S	PCXB;PC	PCXB;PCXA;PC	PYRUVATE CARBOXYLASE, MITOCHONDRIAL;PC		PYC_HUMAN;PC	CARBOXYLASE:PYRUVATE/ACETYL-COA/PROPIONYL-COA;PUTATIVE PYRUVATE CARBOXYLASE, MITOCHONDRIAL;PC	PYC_HUMAN;PYC_MOUSE	PYRUVATE CARBOXYLASE, MITOCHONDRIAL
6901	PORTHOMCL6901[AjBfCgCiGgLvMmOjOlPsSpXl|(13 genes, 12 taxa)]:	-0.386978	-0.822549	-0.745495	-0.17098	0.249167	0	-0.595519	0.796014	-0.812882	-0.756451	-0.683211	-0.750848	CEP95	CEP95	CEP95	CEP95.L;CEP95	CENTROSOMAL PROTEIN 95;CEP95		CENTROSOMAL PROTEIN OF 95 KDA-LIKE		CEP95_HUMAN	PUTATIVE CENTROSOMAL PROTEIN	CEP95_MOUSE	CENTROSOMAL PROTEIN OF 95 KDA
5566	PORTHOMCL5566[AjBfCgCiDrGgLvMmOjOlPsSpXl|(14 genes, 13 taxa)]:	0.216581	-0.461451	-0.20544	-0.223178	-0.847811	-0.394914	-0.499961	0.751608	-0.822029	-0.77257	-0.657353	-0.750651	CCDC157	CCDC157	CCDC157	CCDC157.L	CCDC157	CCDC157	COILED-COIL DOMAIN-CONTAINING PROTEIN 157-LIKE		CC157_MOUSE	PUTATIVE COILED-COIL DOMAIN-CONTAINING PROTEIN	CC157_BOVIN	COILED-COIL DOMAIN-CONTAINING PROTEIN 157
4982	PORTHOMCL4982[AjCgDrGgLvMmOjOlPsSpXl|(15 genes, 11 taxa)]:	-0.433571	-0.839033	-0.841484	0.4325	0.142892	0.555176	0	0	-0.815382	-0.740351	-0.696201	-0.750645	ARHGEF39	ARHGEF39	ARHGEF39	LOC108704031;ARHGEF39.L	ARHGEF39	ARHGEF39			ARG39_MOUSE	PUTATIVE RHO GUANINE NUCLEOTIDE EXCHANGE FACTOR 39	SOX6_XENTR	RHO GUANINE NUCLEOTIDE EXCHANGE FACTOR 39
4343	PORTHOMCL4343[AjBfCgDrGgLvMmOjOlPsSpXl|(15 genes, 12 taxa)]:	0.160385	-0.805011	-0.495495	-0.0316176	0.166201	0.131853	0	-0.072028	-0.844735	-0.66419	-0.742525	-0.750483	RP11-403P17.5;TK2	TK2	TK2	TK2.S;TK2	TK2	TK2			KITM_MOUSE;KITM_HUMAN;TK2	HYPOTHETICAL PROTEIN	KITM_MACFA;TK2	THYMIDINE KINASE 2, MITOCHONDRIAL-LIKE;TK2
6603	PORTHOMCL6603[AjBfCgCiDrGgLvOjOlPsSpXl|(13 genes, 12 taxa)]:	-0.311429	-0.297011	0	-0.401961	0.117353	0.0895588	-0.301104	-0.406096	-0.773765	-0.640537	-0.83701	-0.750437	NSUN4	NSUN4		NSUN4.S;LOC108714289;NSUN4	NSUN4	NSUN4	5-METHYLCYTOSINE RRNA METHYLTRANSFERASE NSUN4-LIKE;NSUN4	NSUN4	NSUN4_BOVIN	PUTATIVE 5-METHYLCYTOSINE RRNA METHYLTRANSFERASE NSUN4-LIKE	NSUN4_HUMAN	5-METHYLCYTOSINE RRNA METHYLTRANSFERASE NSUN4
3670	PORTHOMCL3670[AjBfCgCiDrGgLvMmOjOlPsSpXl|(16 genes, 13 taxa)]:	-0.465659	-0.615868	-0.566154	-0.117892	-0.302034	0.269618	-0.290636	0.322937	-0.897324	-0.725015	-0.628676	-0.750338	NOP58	NOP58	NOP58	NOP58.S;NOP58.L;NOP58	NOP58	NOP58	NUCLEOLAR PROTEIN 58, TRANSCRIPT VARIANT X2; NUCLEOLAR PROTEIN 58, TRANSCRIPT VARIANT X1;NOP58	NOP58	NOP58_MOUSE	PUTATIVE NUCLEOLAR PROTEIN 58;NOP58	NOP58_HUMAN;NOP58	NUCLEOLAR PROTEIN 58;NUCLEOLAR PROTEIN 58-LIKE;NOP58
1214	PORTHOMCL1214[AjBfCgCiDrGgLvMmOjOlPsSpXl|(27 genes, 13 taxa)]:	0.333297	0.650725	0.173791	0.564657	0.440735	0.824912	-0.0961688	0.502587	-0.853765	-0.716182	-0.680147	-0.750031	GLUL	GLUL	GLUL	GLUL-LIKE.1.L;GLUL-LIKE.1.S;GLUL.L;GLUL	GLULA;GLUTAMINE SYNTHETASE;GLUL	GLULB;GLULA;GLULC;GLUL	GLUTAMINE SYNTHETASE	GLUL	GLNA_MOUSE	GLUTAMINE SYNTHETASE	GLNA_CANLF	GLUTAMINE SYNTHETASE
5174	PORTHOMCL5174[AjBfCgCiDrGgLvMmOjOlPsSpXl|(14 genes, 13 taxa)]:	-0.396099	-0.56567	-0.583022	0.381789	0.0968382	0.660588	-0.650481	-0.852341	-0.812088	-0.786894	-0.651103	-0.750028	NELFB	NELFB	NELFB	NELFB.L;NELFB	NELFB	NELFB	NEGATIVE ELONGATION FACTOR B;NELFB	NELFB	NELFB_HUMAN;NELFB	PUTATIVE NEGATIVE ELONGATION FACTOR B;NELFB	NELFB_HUMAN;NELFB	NEGATIVE ELONGATION FACTOR B;NELFB
5584	PORTHOMCL5584[AjBfCiDrGgLvMmOjOlPsSpXl|(14 genes, 12 taxa)]:	0.263017	0.323582	-0.863626	0.221789	-0.68299	-0.395176	-0.908013	0.0649611	-0.902441	-0.894551	-0.453064	-0.750019	MPND	MPND	MPND	CDC27.L;MPND.S;CDC27;MPND	MPND	MPND	MPN DOMAIN-CONTAINING PROTEIN-LIKE;MPND	MPND	MPND_MOUSE;MPND	HYPOTHETICAL PROTEIN	CDC27_BOVIN	MPN DOMAIN-CONTAINING PROTEIN;CELL DIVISION CYCLE PROTEIN 27 HOMOLOG;MPND
3855	PORTHOMCL3855[AjBfCgCiDrGgLvMmOjOlPsSpXl|(16 genes, 13 taxa)]:	-0.338956	-0.930549	-0.525769	-0.000245098	-0.119093	-0.600265	-0.830545	0.477762	-0.851794	-0.671579	-0.726348	-0.749907	DPH5	DPH5	DPH5	DPH5.S;DPH5	DPH5	DPH5	DIPHTHINE METHYL ESTER SYNTHASE-LIKE, TRANSCRIPT VARIANT X1; DIPHTHINE METHYL ESTER SYNTHASE-LIKE, TRANSCRIPT VARIANT X2;DPH5	DPH5	DPH5_MOUSE;DPH5	DIPHTHINE SYNTHASE;DPH5	DPH5_HUMAN;DPH5	DPH5 HOMOLOG (S. CEREVISIAE)-LIKE;DPH5 HOMOLOG-LIKE;DPH5
2854	PORTHOMCL2854[AjBfCgCiDrGgLvMmOjOlPsSpXl|(18 genes, 13 taxa)]:	-0.196374	-0.076967	-0.0908791	-0.679632	-0.0267157	-0.957529	-0.893701	-0.617528	-0.825971	-0.867843	-0.555392	-0.749735	SEC22B	SEC22B	SEC22B	SEC22B.L;SEC22B	SEC22BB;VESICLE-TRAFFICKING PROTEIN SEC22B;SEC22B	SEC22BB;SEC22BA;SEC22B	VESICLE-TRAFFICKING PROTEIN SEC22B;SEC22B	SEC22B	SC22B_CHICK;SEC22B	PUTATIVE VESICLE-TRAFFICKING PROTEIN SEC22B;SEC22B	SC22B_RAT;SEC22B	VESICLE-TRAFFICKING PROTEIN SEC22B;SEC22B
2511	PORTHOMCL2511[AjBfCgCiDrGgLvMmOjOlPsSpXl|(19 genes, 13 taxa)]:	-0.471484	-0.550857	-0.525879	-0.143627	-0.631176	-0.4085	-0.704571	0.139381	-0.808412	-0.86743	-0.572917	-0.749586	MYBBP1A	MYBBP1A	MYBBP1A	MYBBP1A.L;MYBBP1A	MYBBP1A	MYBBP1A	MYB-BINDING PROTEIN 1A-LIKE PROTEIN		MBB1A_HUMAN;DPO5_SCHPO	PUTATIVE MYB-BINDING PROTEIN 1A-LIKE PROTEIN;PUTATIVE MYB-BINDING PROTEIN 1A-LIKE PROTEIN-LIKE	MBB1A_MOUSE	MYB-BINDING PROTEIN 1A-LIKE PROTEIN
2627	PORTHOMCL2627[AjBfCgCiDrGgLvMmOjOlPsSpXl|(19 genes, 13 taxa)]:	-0.409286	-0.517582	0.594066	-0.813799	-0.320588	-0.158588	-0.892247	0.0108785	-0.848971	-0.792776	-0.605515	-0.749087	DNAJA3	DNAJA3	DNAJA3	DNAJA3.L;LOC108703192;DNAJA3	DNAJA3A;DNAJA3B	DNAJA3A;DNAJA3B	DNAJ HOMOLOG SUBFAMILY A MEMBER 3, MITOCHONDRIAL;DNAJ HOMOLOG SUBFAMILY C MEMBER 4-LIKE;CHAPERONE PROTEIN DNAJ-LIKE;DNAJA3	DNAJA3	DNJA3_HUMAN;DNAJA3	PUTATIVE DNAJ-LIKE SUBFAMILY A MEMBER 3, MITOCHONDRIAL	DNJA3_HUMAN;DNAJA3	DNAJ HOMOLOG SUBFAMILY A MEMBER 3, MITOCHONDRIAL;DNAJA3
3264	PORTHOMCL3264[AjBfCgCiDrGgLvMmOjOlPsSpXl|(17 genes, 13 taxa)]:	-0.671429	-0.531692	-0.583352	0.361299	0.0555637	0.00588235	0.405013	0.222972	-0.8765	-0.751496	-0.618873	-0.748956	EFTUD2	EFTUD2	EFTUD2	EFTUD2.S	EFTUD2	EFTUD2	116 KDA U5 SMALL NUCLEAR RIBONUCLEOPROTEIN COMPONENT;EFTUD2		U5S1_CHICK;EFTUD2	HYPOTHETICAL PROTEIN;EFTUD2	U5S1_CHICK;U5S1_MOUSE;EFTUD2	116 KDA U5 SMALL NUCLEAR RIBONUCLEOPROTEIN COMPONENT;116 KDA U5 SMALL NUCLEAR RIBONUCLEOPROTEIN COMPONENT-LIKE
6225	PORTHOMCL6225[AjBfCgCiDrGgLvMmOjOlPsSpXl|(13 genes, 13 taxa)]:	-0.621044	-0.759297	-0.647473	0.221618	-0.167574	0.258265	-0.726714	-0.281189	-0.764853	-0.740888	-0.740809	-0.74885	BUB3	BUB3	BUB3	BUB3.L	BUB3	BUB3	MITOTIC CHECKPOINT PROTEIN BUB3-LIKE;BUB3	BUB3	BUB3_MOUSE;BUB3	BUDDING UNINHIBITED BY BENZIMIDAZOLES 3-LIKE;BUB3	BUB3_MOUSE;BUB3	MITOTIC CHECKPOINT PROTEIN BUB3;BUB3
6750	PORTHOMCL6750[AjBfDrGgLvMmOjOlPsSpXl|(13 genes, 11 taxa)]:	-0.501484	-0.807385	-0.641758	0.23906	0.156029	0.203765	0	-0.396448	-0.879526	-0.662085	-0.703554	-0.748388	HAUS6	HAUS6	HAUS6	HAUS6.L;LOC108706930;HAUS6	HAUS AUGMIN LIKE COMPLEX SUBUNIT 6;HAUS6	HAUS6			HAUS6_DANRE;HAUS6_HUMAN	HYPOTHETICAL PROTEIN	HAUS6_HUMAN	UNCHARACTERIZED LOC762945, TRANSCRIPT VARIANT X2; UNCHARACTERIZED LOC762945, TRANSCRIPT VARIANT X1
4561	PORTHOMCL4561[AjBfCgCiDrGgLvMmOjOlPsSpXl|(15 genes, 13 taxa)]:	-0.44511	-0.744923	-0.542253	0.00431373	0.106765	0.606941	-0.65487	-0.788582	-0.753794	-0.80289	-0.688358	-0.748347	TMEM209	TMEM209	TMEM209	TMEM209.S;TMEM209	TMEM209	TMEM209	TRANSMEMBRANE PROTEIN 209;TMEM209		TM209_XENLA	PUTATIVE TRANSMEMBRANE PROTEIN;HYPOTHETICAL PROTEIN;TMEM209	TM209_MOUSE	TRANSMEMBRANE PROTEIN 209;TMEM209
1937	PORTHOMCL1937[AjBfCgCiDrGgLvMmOjOlPsSpXl|(22 genes, 13 taxa)]:	-0.70456	-0.839604	-0.692308	-0.849375	-0.53848	-0.677735	-0.614026	-0.118182	-0.814235	-0.680619	-0.749265	-0.74804	KNTC1		KNTC1	KNTC1.L;KNTC1	KNTC1	KNTC1	KINETOCHORE-ASSOCIATED PROTEIN 1-LIKE		KNTC1_HUMAN;KNTC1_MOUSE	PUTATIVE KINETOCHORE-ASSOCIATED PROTEIN 1	KNTC1_MOUSE;KNTC1_HUMAN	KINETOCHORE-ASSOCIATED PROTEIN 1
15168	PORTHOMCL15168[AjLvOjSp|(4 genes, 4 taxa)]:	0	0	0	0	0	0	0	0	-0.706824	-0.802724	-0.734523	-0.748024									HYLS1_HUMAN	PUTATIVE HYDROLETHALUS SYNDROME PROTEIN 1	HYLS1_HUMAN	HYDROLETHALUS SYNDROME PROTEIN 1
4506	PORTHOMCL4506[AjBfCgCiDrGgLvMmOjOlPsSpXl|(15 genes, 13 taxa)]:	-0.614835	-0.796967	-0.549835	0.0374265	-0.0917647	0.278059	-0.888442	0.707483	-0.871971	-0.712817	-0.659105	-0.747964	POLE2	POLE2	POLE2	POLE2.L;POLE2	POLE2	POLE2	DNA POLYMERASE EPSILON SUBUNIT 2	POLE2	DPOE2_BOVIN;POLE2	PUTATIVE DNA POLYMERASE EPSILON SUBUNIT 2-LIKE;PUTATIVE DNA POLYMERASE EPSILON SUBUNIT 2	DPOE2_HUMAN;POLE2	DNA POLYMERASE EPSILON SUBUNIT 2;POLE2
3884	PORTHOMCL3884[AjBfCgCiDrLvMmOjOlPsSpXl|(16 genes, 12 taxa)]:	0	-0.565275	-0.934341	-0.126275	-0.245711	0.434588	-0.661143	-0.0458741	-0.744294	-0.756388	-0.742157	-0.747613		CCHCR1	CCHCR1	CCHCR1.L	COILED-COIL ALPHA-HELICAL ROD PROTEIN 1;CCHCR1	SI:DKEYP-20G2.1;SI:DKEYP-20G2.3;CCHCR1	COILED-COIL ALPHA-HELICAL ROD PROTEIN 1		CCHCR_PANTR	PUTATIVE COILED-COIL ALPHA-HELICAL ROD PROTEIN 1-LIKE	CCHCR_PANPA	COILED-COIL ALPHA-HELICAL ROD PROTEIN 1;COILED-COIL ALPHA-HELICAL ROD PROTEIN 1, TRANSCRIPT VARIANT X2; COILED-COIL ALPHA-HELICAL ROD PROTEIN 1, TRANSCRIPT VARIANT X1
5164	PORTHOMCL5164[AjBfCgCiDrGgLvMmOjOlSpXl|(14 genes, 12 taxa)]:	-0.0812637	0	-0.46956	-0.705074	-0.139559	0.723088	-0.634636	-0.327343	-0.751294	-0.653973	-0.83701	-0.747426	PIGO		PIGO	PIGO.L;PIGO	PIGO	PIGO	GPI ETHANOLAMINE PHOSPHATE TRANSFERASE 3-LIKE, TRANSCRIPT VARIANT X1; GPI ETHANOLAMINE PHOSPHATE TRANSFERASE 3-LIKE, TRANSCRIPT VARIANT X2;LOC100182379		PIGO_MOUSE	PUTATIVE GPI ETHANOLAMINE PHOSPHATE TRANSFERASE 3	PIGO_HUMAN	GPI ETHANOLAMINE PHOSPHATE TRANSFERASE 3
1374	PORTHOMCL1374[AjBfCgCiDrGgLvMmOjOlPsSpXl|(25 genes, 13 taxa)]:	0.438846	-0.648308	0.340604	-0.223725	0.491789	0.418059	-0.849792	-0.893665	-0.808088	-0.728793	-0.704412	-0.747098	ADARB1;ADARB2	ADARB1	ADARB1;ADARB2	ADARB1.S;ADARB1.L;ADARB1	ADARB1B;DOUBLE-STRANDED RNA-SPECIFIC EDITASE 1	ADARB1B;ADARB1A;ADARB2	DOUBLE-STRANDED RNA-SPECIFIC EDITASE 1-LIKE;ADARB1	ADARB1	RED1_RAT	PUTATIVE DOUBLE-STRANDED RNA-SPECIFIC EDITASE 1-LIKE ISOFORM X2;DOUBLE-STRANDED RNA-SPECIFIC EDITASE 1	RED1_MOUSE;ADARB1	DOUBLE-STRANDED RNA-SPECIFIC EDITASE 1;ADARB1
6256	PORTHOMCL6256[AjBfCgCiDrGgLvMmOjOlPsSpXl|(13 genes, 13 taxa)]:	0.0838462	-0.763429	-0.637363	0.392696	-0.377402	0.653529	-0.932649	0.381049	-0.674765	-0.848194	-0.717892	-0.74695	WTAP	WTAP	WTAP	WTAP.S	WTAP	WTAP	PRE-MRNA-SPLICING REGULATOR WTAP-LIKE	WTAP	FL2D_DANRE;WTAP	PUTATIVE PRE-MRNA-SPLICING REGULATOR WTAP	FL2D_DANRE	FK506-BINDING PROTEIN 5
4599	PORTHOMCL4599[AjBfCgCiDrLvMmOjOlPsSpXl|(15 genes, 12 taxa)]:	0	-0.352	-0.308407	0.375539	0.11027	0.0116765	-0.899182	0.519301	-0.837588	-0.754448	-0.646936	-0.746324		STX5	STX5A;STX5	STX5.S;STX5	STX5A;STX5	STX5A;STX5AL;STX5	SYNTAXIN-5-LIKE;STX5	STX5	STX5_BOVIN;STX5	HYPOTHETICAL PROTEIN;STX5	STX5_MOUSE;STX5_BOVIN;STX5	SYNTAXIN-5;STX5
2129	PORTHOMCL2129[AjBfCgCiDrGgLvMmOjOlPsSpXl|(21 genes, 13 taxa)]:	-0.525495	-0.88233	-0.708407	0.366078	-0.452059	0.673529	0.829494	-0.439333	-0.814471	-0.873829	-0.55049	-0.746263	SYNCRIP;HNRNPR	SYNCRIP;HNRNPR	SYNCRIP;HNRNPR	SYNCRIP.L;SYNCRIP.S;SYNCRIP	SYNCRIPL;HNRNPR;SYNCRIP	HNRNPR;SYNCRIP;SYNCRIPL	HETEROGENEOUS NUCLEAR RIBONUCLEOPROTEIN R, TRANSCRIPT VARIANT X3; HETEROGENEOUS NUCLEAR RIBONUCLEOPROTEIN R, TRANSCRIPT VARIANT X2; HETEROGENEOUS NUCLEAR RIBONUCLEOPROTEIN R, TRANSCRIPT VARIANT X1;SYNCRIP	HNRNPR	HNRPQ_MOUSE;HNRNPR	HETEROGENEOUS NUCLEAR RIBONUCLEOPROTEIN Q	HNRPQ_MOUSE;HNRNPR	HETEROGENEOUS NUCLEAR RIBONUCLEOPROTEIN R;HNRNPR
2974	PORTHOMCL2974[AjBfCgCiDrGgLvMmOjOlPsSpXl|(18 genes, 13 taxa)]:	-0.190824	-0.768396	-0.794011	-0.313578	-0.208873	-0.0542647	-0.747909	0.543846	-0.867	-0.72849	-0.642605	-0.746032	CEP128	CEP128	CEP128	CEP128.L;CEP128	CEP128	CEP128	CENTROSOMAL PROTEIN OF 128 KDA-LIKE		CE128_HUMAN	PUTATIVE CENTROSOMAL PROTEIN;HYPOTHETICAL PROTEIN	CE128_HUMAN	SPINDLE POLE BODY COMPONENT 110;CENTROSOMAL PROTEIN OF 128 KDA
5206	PORTHOMCL5206[AjBfCgCiDrGgLvMmOjOlPsSpXl|(14 genes, 13 taxa)]:	-0.472143	-0.702813	-0.624451	0.282966	0.178652	0.702882	-0.777221	-0.44347	-0.917941	-0.78613	-0.533088	-0.74572	GLE1	GLE1	GLE1	GLE1.L	GLE1, RNA EXPORT MEDIATOR;GLE1	GLE1	NUCLEOPORIN GLE1		GLE1_MOUSE	PUTATIVE NUCLEOPORIN GLE1	GLE1_PONAB	NUCLEOPORIN GLE1
5277	PORTHOMCL5277[AjBfCgCiDrGgLvMmOjOlPsSpXl|(14 genes, 13 taxa)]:	-0.481484	-0.535033	-0.613956	-0.36799	-0.00208333	0.0932647	-0.914792	0.769441	-0.913529	-0.731847	-0.590196	-0.745191	ISY1	ISY1	ISY1;GM45140	ISY1.L;ISY1	ISY1	ISY1	PRE-MRNA-SPLICING FACTOR ISY1 HOMOLOG;ISY1	ISY1	ISY1_HUMAN;ISY1	PUTATIVE PRE-MRNA-SPLICING FACTOR ISY1-LIKE;ISY1	ISY1_RAT	PRE-MRNA-SPLICING FACTOR ISY1 HOMOLOG;ISY1
5718	PORTHOMCL5718[AjBfCgCiDrGgLvMmOjOlPsSpXl|(14 genes, 13 taxa)]:	0.190055	0.349231	0.0113187	0.13348	0.0729167	0.452294	-0.833545	0.153684	-0.765912	-0.862745	-0.606863	-0.745173		TMEM115	TMEM115	TMEM115.L;TMEM115.S;TMEM115	TMEM115	TMEM115	TRANSMEMBRANE PROTEIN 115-LIKE;TMEM115	TMEM115	TM115_HUMAN;TMEM115	PUTATIVE TRANSMEMBRANE PROTEIN;TMEM115	TM115_HUMAN;TMEM115	TRANSMEMBRANE PROTEIN 115;TMEM115
5801	PORTHOMCL5801[BfCgCiDrLvMmOjOlPsSpXl|(14 genes, 11 taxa)]:	0	-0.904571	-0.721758	0.101078	-0.0958333	0.171824	-0.310701	0.798608	-0.860801	-0.82871	-0.545221	-0.74491		POLA1	POLA1	POLA1.S	POLA1	POLA1	DNA POLYMERASE ALPHA CATALYTIC SUBUNIT-LIKE	POLA1	DPOLA_XENLA;DPOA_YEAST;POLA1		DPOLA_XENLA	DNA POLYMERASE ALPHA CATALYTIC SUBUNIT;POLA1
736	PORTHOMCL736[AjBfCgCiDrGgLvMmOjOlPsSpXl|(34 genes, 13 taxa)]:	-0.146978	-0.867824	-0.827308	0.416887	-0.0646814	0.5545	-0.819519	0.607832	-0.787529	-0.767389	-0.679044	-0.744654	EHMT1	EHMT1	EHMT1;EHMT2	EHMT2.L;LOC108698163;EHMT1.S;EHMT2;EHMT1	EHMT1B;EHMT2	EHMT1B;EHMT1A;EHMT2	RECEPTOR-INTERACTING SERINE/THREONINE-PROTEIN KINASE 4-LIKE;HISTONE-LYSINE N-METHYLTRANSFERASE EHMT2		EHMT2_MOUSE;ANR63_HUMAN	PUTATIVE HISTONE-LYSINE N-METHYLTRANSFERASE EHMT1;PUTATIVE ENOLASE-PHOSPHATASE E1-LIKE;HYPOTHETICAL PROTEIN	EHMT2_HUMAN	HISTONE-LYSINE N-METHYLTRANSFERASE EHMT1;ANKYRIN REPEAT, PH AND SEC7 DOMAIN CONTAINING PROTEIN SECG-LIKE;SERINE/THREONINE-PROTEIN PHOSPHATASE 6 REGULATORY ANKYRIN REPEAT SUBUNIT B-LIKE;HISTONE-LYSINE N-METHYLTRANSFERASE EHMT2
13659	PORTHOMCL13659[LvOjSp|(5 genes, 3 taxa)]:	0	0	0	0	0	0	0	0	-0.831159	-0.65908	-0.742525	-0.744254									RMI1_CHICK		RMI1_CHICK;RMI1_HUMAN	RECQ-MEDIATED GENOME INSTABILITY PROTEIN 1
2368	PORTHOMCL2368[AjBfCgCiDrGgLvMmOjOlPsSpXl|(20 genes, 13 taxa)]:	-0.399231	-0.662725	-0.564121	0.431422	0.140515	0.712941	-0.906442	-0.720559	-0.876235	-0.661176	-0.694608	-0.744007	CDC20	CDC20	CDC20	CDC20.L	FZR1B;CDC20	CDC20	CELL DIVISION CYCLE PROTEIN 20 HOMOLOG;CDC20	CDC20	CDC20_HUMAN;CDC20_MOUSE;CDC20	PUTATIVE CELL DIVISION CYCLE PROTEIN 20-LIKE;CDC20	CDC20_HUMAN;CDC20	CELL DIVISION CYCLE PROTEIN 20 HOMOLOG;CDC20
6956	PORTHOMCL6956[BfCgCiDrGgLvMmOjOlPsSpXl|(13 genes, 12 taxa)]:	-0.30989	-0.910022	-0.535385	0.40027	-0.473848	0.441294	-0.863532	-0.354545	-0.833471	-0.709659	-0.688603	-0.743911	TRMT5	TRMT5	TRMT5	TRMT5.L;TRMT5	TRMT5	TRMT5	TRNA (GUANINE(37)-N1)-METHYLTRANSFERASE-LIKE, TRANSCRIPT VARIANT X1; TRNA (GUANINE(37)-N1)-METHYLTRANSFERASE-LIKE, TRANSCRIPT VARIANT X2;TRMT5	TRMT5	TRM5_XENTR;TRMT5		TRM5_DANRE;TRMT5	TRNA (GUANINE(37)-N1)-METHYLTRANSFERASE;TRNA (GUANINE(37)-N1)-METHYLTRANSFERASE, TRANSCRIPT VARIANT X4; TRNA (GUANINE(37)-N1)-METHYLTRANSFERASE, TRANSCRIPT VARIANT X1; TRNA (GUANINE(37)-N1)-METHYLTRANSFERASE, TRANSCRIPT VARIANT X3; TRNA (GUANINE(37)-N1)-METHYLTRANSFERASE, TRANSCRIPT VARIANT X2;TRMT5
2592	PORTHOMCL2592[AjBfCgCiDrGgLvMmOjOlPsSpXl|(19 genes, 13 taxa)]:	-0.236429	-0.778681	-0.425769	0.416667	0.110196	0.667735	-0.189753	-0.702867	-0.834059	-0.723818	-0.672549	-0.743475	JMJD6	JMJD6	JMJD6	JMJD6.L;JMJD6.S;JMJD6	JMJD6	JMJD6	BIFUNCTIONAL ARGININE DEMETHYLASE AND LYSYL-HYDROXYLASE JMJD6-A;JMJD6	JMJD6	JMJD6_DANRE;JMJD6	PUTATIVE BIFUNCTIONAL ARGININE DEMETHYLASE AND LYSYL-HYDROXYLASE JMJD6-B-LIKE;JMJD6	JMJD6_CHICK;JMJD6_DROME;JMJD6	BIFUNCTIONAL ARGININE DEMETHYLASE AND LYSYL-HYDROXYLASE JMJD6;F-BOX PROTEIN AT1G78280
2837	PORTHOMCL2837[AjBfCgCiDrGgLvMmOjOlPsSpXl|(18 genes, 13 taxa)]:	-0.502253	-0.744747	-0.518571	-0.22076	0.00688725	0.142118	-0.928506	0.308951	-0.848794	-0.818101	-0.563235	-0.743377	PPIL4	PPIL4	PPIL4	PPIL4.S;PPIL4	PPIL4	PPIL4	PEPTIDYL-PROLYL CIS-TRANS ISOMERASE-LIKE 4;PPIL4	PPIL4	PPIL4_HUMAN;PPIL4_MOUSE;PPIL4_RHIO9;PPIL4	PUTATIVE PEPTIDYL-PROLYL CIS-TRANS ISOMERASE-LIKE 4-LIKE	PPIL4_HUMAN;PPIL4	PEPTIDYL-PROLYL CIS-TRANS ISOMERASE-LIKE 4;PPIL4
831	PORTHOMCL831[AjBfCgCiDrGgLvMmOjOlPsSpXl|(32 genes, 13 taxa)]:	0.171593	-0.832879	-0.758242	0.423431	-0.110049	0.718235	-0.75439	-0.424834	-0.849735	-0.815108	-0.565196	-0.743347	SMARCD1;SMARCD3;SMARCD2	SMARCD1;SMARCD2;SMARCD3	SMARCD1;SMARCD3;SMARCD2	SMARCD1.S;SMARCD1.L;LOC108704644;LOC108695582;SMARCD1;SMARCD3	SMARCD1;SMARCD3B;SMARCD2;SMARCD3	SMARCD1;SMARCD3B;SMARCD3A;SMARCD2	SWI/SNF-RELATED MATRIX-ASSOCIATED ACTIN-DEPENDENT REGULATOR OF CHROMATIN SUBFAMILY D MEMBER 1	SMARCD1	KAT2B_HUMAN	PUTATIVE REGULATOR OF CHROMATIN SUBFAMILY D MEMBER 1;PUTATIVE REGULATOR OF CHROMATIN SUBFAMILY D MEMBER 1-LIKE	SMRD1_HUMAN	SWI/SNF-RELATED MATRIX-ASSOCIATED ACTIN-DEPENDENT REGULATOR OF CHROMATIN SUBFAMILY D MEMBER 1;SWI/SNF-RELATED MATRIX-ASSOCIATED ACTIN-DEPENDENT REGULATOR OF CHROMATIN SUBFAMILY D MEMBER 1-LIKE;LOC108873437
5712	PORTHOMCL5712[AjBfCgCiDrGgLvMmOjOlPsSpXl|(14 genes, 13 taxa)]:	-0.265824	-0.549538	-0.616703	-0.219289	-0.122034	-0.302735	-0.860623	0	-0.703853	-0.767513	-0.75674	-0.742702	PRIM1	PRIM1	PRIM1	PRIM1.S;PRIM1	PRIM1	PRIM1	DNA PRIMASE SMALL SUBUNIT;PRIM1	PRIM1	PRI1_HUMAN;PRIM1	PUTATIVE DNA PRIMASE SMALL SUBUNIT-LIKE;PRIM1	PRI1_MOUSE;PRIM1	DNA PRIMASE SMALL SUBUNIT-LIKE;PRIM1
3890	PORTHOMCL3890[AjBfCgCiDrGgLvMmOjOlPsSpXl|(16 genes, 13 taxa)]:	-0.189615	-0.513846	-0.124121	-0.536324	-0.197181	-0.00705882	-0.891948	-0.876506	-0.847559	-0.743467	-0.636887	-0.742638	ARMC6	ARMC6	ARMC6	ARMC6.L;ARMC6	ARMC6	ARMC6	ARMADILLO REPEAT-CONTAINING PROTEIN 6, TRANSCRIPT VARIANT X1; ARMADILLO REPEAT-CONTAINING PROTEIN 6, TRANSCRIPT VARIANT X2;ARMC6	ARMC6	ARMC6_MOUSE;ARMC6	PUTATIVE ARMADILLO REPEAT-CONTAINING PROTEIN 6-LIKE;HYPOTHETICAL PROTEIN;ARMC6	ARMC6_MOUSE;ARMC6	ARMADILLO REPEAT-CONTAINING PROTEIN 6, TRANSCRIPT VARIANT X2; ARMADILLO REPEAT-CONTAINING PROTEIN 6, TRANSCRIPT VARIANT X1; ARMADILLO REPEAT-CONTAINING PROTEIN 6, TRANSCRIPT VARIANT X3; ARMADILLO REPEAT-CONTAINING PROTEIN 6, TRANSCRIPT VARIANT X4;ARMC6
3203	PORTHOMCL3203[AjBfCgCiDrGgLvMmOjOlPsSpXl|(17 genes, 13 taxa)]:	-0.252747	-0.944176	-0.447527	-0.823456	-0.622328	-0.205529	-0.0881429	0.896224	-0.738588	-0.9013	-0.58799	-0.742626	C5ORF22	C5ORF22	6030458C11RIK	C5ORF22.L	ZGC:56556	ZGC:56556	UPF0489 PROTEIN C5ORF22 HOMOLOG		CE022_DANRE	PUTATIVE UPF0489 PROTEIN C5ORF22-LIKE;HYPOTHETICAL PROTEIN	CE022_MOUSE	UPF0489 PROTEIN C5ORF22 HOMOLOG
1334	PORTHOMCL1334[AjBfCgCiDrGgLvMmOjOlPsSpXl|(26 genes, 13 taxa)]:	-0.352363	-0.860967	-0.614011	-0.233235	-0.00541667	-0.0217353	-0.750506	-0.656501	-0.851735	-0.764954	-0.609338	-0.742009	RECQL5	RECQL5	RECQL5	RECQL5.L;BLM.L;RECQL5;BLM	RECQL5	RECQL5	ATP-DEPENDENT DNA HELICASE Q5-LIKE	RECQL5	RECQ5_HUMAN	PUTATIVE ATP-DEPENDENT DNA HELICASE Q5	RECQ5_HUMAN	ATP-DEPENDENT DNA HELICASE Q5;ATP-DEPENDENT DNA HELICASE Q5-LIKE, TRANSCRIPT VARIANT X1; ATP-DEPENDENT DNA HELICASE Q5-LIKE, TRANSCRIPT VARIANT X2
4053	PORTHOMCL4053[AjBfCgCiDrGgLvMmOjOlPsSpXl|(16 genes, 13 taxa)]:	-0.525055	-0.578989	-0.486429	-0.275882	-0.371005	-0.288382	0.653675	-0.178462	-0.890412	-0.722621	-0.612377	-0.741803	GNL2	GNL2	GNL2	GNL2.L;GNL2	GNL2	GNL2	NUCLEOLAR GTP-BINDING PROTEIN 2-LIKE		NOG2_MOUSE;GNL2	PUTATIVE NUCLEOLAR GTP-BINDING PROTEIN 2 ISOFORM X2;PUTATIVE NUCLEOLAR GTP-BINDING PROTEIN 2 ISOFORM X4;HYPOTHETICAL PROTEIN;GNL2	NOG2_MOUSE;GNL2	NUCLEOLAR GTP-BINDING PROTEIN 2, TRANSCRIPT VARIANT X4; NUCLEOLAR GTP-BINDING PROTEIN 2, TRANSCRIPT VARIANT X3; NUCLEOLAR GTP-BINDING PROTEIN 2, TRANSCRIPT VARIANT X1; NUCLEOLAR GTP-BINDING PROTEIN 2, TRANSCRIPT VARIANT X2;GNL2
3786	PORTHOMCL3786[AjBfCgCiDrGgLvMmOjOlPsSpXl|(16 genes, 13 taxa)]:	-0.0303846	-0.261758	-0.370769	-0.161054	-0.527475	-0.117618	-0.563688	-0.789785	-0.691735	-0.757606	-0.77549	-0.74161	DHDDS	DHDDS	DHDDS	DHDDS.L;DHDDS.S;DHDDS	DHDDS	DHDDS	DEHYDRODOLICHYL DIPHOSPHATE SYNTHASE COMPLEX SUBUNIT DHDDS-LIKE;DHDDS	DHDDS	DHDDS_HUMAN;DHDDS	PUTATIVE DEHYDRODOLICHYL DIPHOSPHATE SYNTASE COMPLEX SUBUNIT DHDDS;DHDDS	DHDDS_HUMAN;DHDDS	DEHYDRODOLICHYL DIPHOSPHATE SYNTASE COMPLEX SUBUNIT DHDDS;DHDDS
2181	PORTHOMCL2181[AjBfCgCiDrGgLvMmOjOlPsSpXl|(20 genes, 13 taxa)]:	-0.286923	-0.558462	-0.611923	0.0338971	-0.120711	0.693912	-0.642312	-0.13252	-0.782706	-0.852817	-0.588358	-0.741294	CSTF2	CSTF2	CSTF2;CSTF2T	CSTF2.L;XETROV90003756M.S;CSTF2	CSTF2	CSTF2	CLEAVAGE STIMULATION FACTOR SUBUNIT 2;CSTF2	CSTF2	CSTF2_MOUSE	PUTATIVE CLEAVAGE STIMULATION FACTOR SUBUNIT 2;CLEAVAGE STIMULATION FACTOR SUBUNIT 2;HYPOTHETICAL PROTEIN	CSTF2_BOVIN;CSTF2	CLEAVAGE STIMULATION FACTOR SUBUNIT 2
3939	PORTHOMCL3939[AjBfCgCiDrGgLvMmOjOlPsSpXl|(16 genes, 13 taxa)]:	-0.409121	-0.630989	-0.544451	0.258775	-0.0369608	0.568382	-0.944896	-0.716303	-0.849912	-0.701321	-0.672549	-0.741261	KAT7	KAT7	KAT7	MYST2;KAT7	HISTONE ACETYLTRANSFERASE KAT7;KAT7B;KAT7	KAT7A;KAT7B;KAT7	ZINC FINGER PROTEIN;KAT7	KAT7	KAT7_HUMAN	PUTATIVE HISTONE ACETYLTRANSFERASE KAT7-LIKE ISOFORM X5;PUTATIVE HISTONE ACETYLTRANSFERASE KAT7;KAT7	KAT7_RAT	HISTONE ACETYLTRANSFERASE KAT7;KAT7
641	PORTHOMCL641[AjBfCgCiDrGgLvMmOjOlPsSpXl|(36 genes, 13 taxa)]:	0.733132	-0.47389	-0.55033	0.0105882	0.437917	0.3325	-0.739286	-0.025035	-0.877882	-0.758204	-0.584559	-0.740215	TAOK1;TAOK3	TAOK1;TAOK3	TAOK1;TAOK3;TAOK2	TAOK1.S;TAOK3.S;TAOK3.L;TAOK2.S;TAOK1.L;TAOK1;TAOK3	SERINE/THREONINE-PROTEIN KINASE TAO1;TAOK2A;TAOK1;SERINE/THREONINE-PROTEIN KINASE TAO2;TAO KINASE 3;TAOK3B;TAOK3	TAOK1B;TAOK2A;TAOK2B;TAOK3A;TAOK1A;TAOK3B;TAOK1;TAOK3	SERINE/THREONINE-PROTEIN KINASE TAO3-LIKE, TRANSCRIPT VARIANT X3; SERINE/THREONINE-PROTEIN KINASE TAO3-LIKE, TRANSCRIPT VARIANT X2; SERINE/THREONINE-PROTEIN KINASE TAO3-LIKE, TRANSCRIPT VARIANT X1	TAOK3	TAOK1_RAT	PUTATIVE SERINE/THREONINE-PROTEIN KINASE TAO1;PUTATIVE SERINE/THREONINE-PROTEIN KINASE TAO1 ISOFORM X2;PUTATIVE SERINE/THREONINE-PROTEIN KINASE TAO1 ISOFORM X1	TAOK1_RAT;TAOK3_CHICK	SERINE/THREONINE-PROTEIN KINASE TAO1;SERINE/THREONINE-PROTEIN KINASE TAO1, TRANSCRIPT VARIANT X2; SERINE/THREONINE-PROTEIN KINASE TAO1, TRANSCRIPT VARIANT X1;TAOK3
5572	PORTHOMCL5572[AjBfCgCiDrGgLvMmOjOlPsSpXl|(14 genes, 13 taxa)]:	-0.281209	-0.727253	0.49956	0.0113235	-0.0176225	0.250559	-0.817636	0.397483	-0.776529	-0.808586	-0.634804	-0.739973	DNAJC25	DNAJC25	DNAJC25	DNAJC25.S;DNAJC25	DNAJC25	DNAJC25	DNAJ HOMOLOG SUBFAMILY C MEMBER 25-LIKE;DNAJC25	DNAJC25	DJC25_XENLA;DNAJ	HYPOTHETICAL PROTEIN;PUTATIVE DNAJ-LIKE SUBFAMILY C MEMBER 25;DNAJC25	DJC25_DROME	DNAJ HOMOLOG SUBFAMILY C MEMBER 25 HOMOLOG
6369	PORTHOMCL6369[AjBfCgCiDrGgLvMmOjPsSpXl|(13 genes, 12 taxa)]:	-0.381044	-0.611824	-0.542637	0.410417	0	0.583353	-0.81639	0	-0.821441	-0.729742	-0.667034	-0.739406	DBR1	DBR1	DBR1	DBR1.L;DBR1.S;DBR1		DBR1	LARIAT DEBRANCHING ENZYME-LIKE;DBR1	DBR1	DBR1A_XENLA;DBR1	PUTATIVE LARIAT DEBRANCHING ENZYME A ISOFORM X1;DBR1	DBR1A_XENLA;DBR1	LARIAT DEBRANCHING ENZYME A, TRANSCRIPT VARIANT X3; LARIAT DEBRANCHING ENZYME A, TRANSCRIPT VARIANT X2; LARIAT DEBRANCHING ENZYME A, TRANSCRIPT VARIANT X1;DBR1
6672	PORTHOMCL6672[AjBfDrGgLvMmOjOlPsSpXl|(13 genes, 11 taxa)]:	-0.406099	-0.721758	-0.572363	0.418529	0.00892157	0.543206	0	0.011958	-0.719647	-0.729928	-0.767647	-0.739074	POLR2B	POLR2B	POLR2B	POLR2B.L;LOC108712074;POLR2B	POLR2B	CABZ01048453.1;RPII140		POLR2B	RPB2_HUMAN;POLR2B	PUTATIVE DNA-DIRECTED RNA POLYMERASE II SUBUNIT RPB2-LIKE	RPB2_MOUSE	DNA-DIRECTED RNA POLYMERASE II SUBUNIT RPB2;DNA-DIRECTED RNA POLYMERASE II SUBUNIT RPB2-LIKE;RPB2
3474	PORTHOMCL3474[AjCiDrGgLvMmOjOlPsSp|(17 genes, 10 taxa)]:	-0.482527	-0.895297	-0.727473	0	0.118211	0.552794	-0.695364	0	-0.737881	-0.81323	-0.66401	-0.738374	KIF18A;KIF18B	KIF18A	KIF18A;KIF18B		KIF18A	KIF18A	KINESIN-LIKE PROTEIN KIF3A, TRANSCRIPT VARIANT X1; KINESIN-LIKE PROTEIN KIF3A, TRANSCRIPT VARIANT X2;KINESIN HEAVY CHAIN;LOC100178231		KI18A_HUMAN	HYPOTHETICAL PROTEIN;PUTATIVE KINESIN-LIKE PROTEIN KIF18A-LIKE	KI18A_HUMAN	KINESIN-LIKE PROTEIN KIF18B
5286	PORTHOMCL5286[AjBfCgCiDrGgLvMmOjOlSpXl|(14 genes, 12 taxa)]:	-0.59467	0	-0.551154	0.410735	0.0689461	0.700324	-0.895468	-0.815105	-0.884118	-0.782126	-0.548775	-0.738339			ANLN	ANLN.L	ANLN	ANLN	ACTIN-BINDING PROTEIN ANILLIN-LIKE, TRANSCRIPT VARIANT X1; ACTIN-BINDING PROTEIN ANILLIN-LIKE, TRANSCRIPT VARIANT X2; ACTIN-BINDING PROTEIN ANILLIN-LIKE, TRANSCRIPT VARIANT X3		ANLN_XENLA	PUTATIVE ACTIN-BINDING PROTEIN ANILLIN-LIKE ISOFORM X2	ANLN_XENLA	ACTIN-BINDING PROTEIN ANILLIN-LIKE, TRANSCRIPT VARIANT X2; ACTIN-BINDING PROTEIN ANILLIN-LIKE, TRANSCRIPT VARIANT X1
5344	PORTHOMCL5344[AjBfCgCiDrGgLvMmOjOlPsSpXl|(14 genes, 13 taxa)]:	-0.608956	-0.730769	-0.583352	0.0986275	0.128701	-0.478059	-0.767182	-0.163471	-0.911147	-0.706708	-0.596569	-0.738141	CHORDC1	CHORDC1	CHORDC1	CHORDC1.S;CHORDC1	CHORDC1	CHORDC1B;CHORDC1A;CHORDC1	CYSTEINE AND HISTIDINE-RICH DOMAIN-CONTAINING PROTEIN 1-LIKE;CHORDC1	CHORDC1	CHRD1_DANRE;CHORDC1	PUTATIVE CYSTEINE AND HISTIDINE-RICH DOMAIN-CONTAINING PROTEIN 1;CHORDC1	CHRD1_MOUSE	CYSTEINE AND HISTIDINE-RICH DOMAIN-CONTAINING PROTEIN 1;CHORDC1
5175	PORTHOMCL5175[AjBfCiDrGgLvMmOjPsSpXl|(14 genes, 11 taxa)]:	-0.536209	-0.592396	-0.83522	-0.212843	0	0.295966	-0.831052	0.777832	-0.822971	-0.753787	-0.6375	-0.738086	STXBP4	STXBP4	STXBP4	LOC108701009;STXBP4		STXBP4	SYNTAXIN-BINDING PROTEIN 4-LIKE		STXB4_HUMAN	HYPOTHETICAL PROTEIN;PUTATIVE SYNTAXIN-BINDING PROTEIN 4;PUTATIVE SYNTAXIN-BINDING PROTEIN 4-LIKE	STXB4_HUMAN	SYNTAXIN-BINDING PROTEIN 4
659	PORTHOMCL659[AjBfCgCiDrGgLvMmOjOlPsSpXl|(36 genes, 13 taxa)]:	-0.477527	-0.526549	-0.507143	0.0686029	0.25598	0.360735	-0.808987	-0.865455	-0.861559	-0.835686	-0.516789	-0.738011	DNAJA1;DNAJA4;DNAJB11	DNAJA1;DNAJB11;DNAJA4	DNAJA1;DNAJB11;DNAJA4	DNAJA4.1.L;DNAJB11.S;DNAJA1.L;DNAJA1.S;DNAJB11.L;DNAJA1;DNAJB11	DNAJA4;DNAJA1	DNAJA1;DNAJB11;DNAJA4	DNAJ HOMOLOG SUBFAMILY A MEMBER 1-LIKE;DNAJ HOMOLOG SUBFAMILY B MEMBER 11-LIKE;DNAJ HOMOLOG SUBFAMILY A MEMBER 2-LIKE;DNAJA1;DNAJB11	DNAJA1;DNAJB11	DNJA1_RAT;DJB11_PONAB;DNAJA1;DNAJB11	PUTATIVE DNAJ-LIKE SUBFAMILY A MEMBER 1;PUTATIVE DNAJ-LIKE SUBFAMILY B MEMBER 11;DNAJA1;DNAJB11	DNJA1_PONAB	DNAJ HOMOLOG SUBFAMILY A MEMBER 1;DNAJ HOMOLOG SUBFAMILY B MEMBER 11;DNAJA1;DNAJB11
4388	PORTHOMCL4388[AjBfCgCiDrGgLvMmOjOlPsSpXl|(15 genes, 13 taxa)]:	-0.072967	-0.53178	-0.602198	0.0517892	-0.604265	-0.0395882	-0.846364	0.0988685	-0.770206	-0.902002	-0.540441	-0.73755	CHTF18	CHTF18	CHTF18	CHTF18.L;CHTF18	CHROMOSOME TRANSMISSION FIDELITY FACTOR 18;CHTF18	CHTF18	CHROMOSOME TRANSMISSION FIDELITY PROTEIN 18 HOMOLOG, TRANSCRIPT VARIANT X1; CHROMOSOME TRANSMISSION FIDELITY PROTEIN 18 HOMOLOG, TRANSCRIPT VARIANT X2;CHTF18		CTF18_XENLA;CHTF18	PUTATIVE CHROMOSOME TRANSMISSION FIDELITY PROTEIN 18-LIKE	CTF18_XENLA	CHROMOSOME TRANSMISSION FIDELITY PROTEIN 18 HOMOLOG
5357	PORTHOMCL5357[AjBfCgCiDrLvMmOjOlSpXl|(14 genes, 11 taxa)]:	0	0	-0.857637	-0.911936	0.101348	0.104647	-0.873506	-0.793846	-0.900471	-0.767616	-0.544485	-0.737524			BAG6	BAG6.S;BAG6.L;BAG6	BAG6	BAG6L;BAG6	LARGE PROLINE-RICH PROTEIN BAG6-LIKE		BAG6_DANRE	PUTATIVE LARGE PROLINE-RICH PROTEIN BAG6-LIKE	BAG6_DANRE	LARGE PROLINE-RICH PROTEIN BAG6, TRANSCRIPT VARIANT X1; LARGE PROLINE-RICH PROTEIN BAG6, TRANSCRIPT VARIANT X2;LARGE PROLINE-RICH PROTEIN BAG6
59	PORTHOMCL59[AjBfCgCiDrGgLvMmOjOlPsSpXl|(138 genes, 13 taxa)]:	-0.127473	-0.810813	-0.925934	0.370304	-0.0168137	0.10085	-0.259608	-0.562378	-0.894824	-0.742539	-0.575063	-0.737475	HIST2H3A;CENPA	HIST2H3A	HIST1H3B;HIST1H3C;HIST1H3D;HIST1H3E;HIST1H3F;HIST2H3B;HIST2H3C1;HIST2H3C2;HIST1H3A;HIST1H3G;HIST1H3I;HIST1H3H;CENPA	LOC108695575;LOC108704296;LOC108704297;XELAEV18028555M;LOC108705672;LOC108716541;LOC108704298;HIST1H3G.L;LOC108716540;XELAEV18028550M;LOC108705881;LOC108703785;LOC108703784;XELAEV18001465M;CENPA.L;CENPA	HISTONE H3;HISTONE H3.3;SI:DKEY-23A13.21;CENPA	SI:CH211-113A14.8;SI:DKEY-261M9.10;SI:DKEY-261M9.8;SI:CH73-36P18.2;SI:DKEY-108K21.25;ZGC:113983;HIST2H3C;SI:CH1073-159D7.4;SI:CH1073-159D7.3;SI:CH73-368J24.7;HIST2H3A;SI:CH73-368J24.5;SI:DKEY-23A13.21;HIST2H3PS2 (1 OF MANY);SI:DKEY-108K21.24	HISTONE H3		H3_URECA;CENPA_NEUCR;CENPA_DANRE	HYPOTHETICAL PROTEIN	H3_STRDR;CENPA_DANRE;CENPA	HISTONE H3, EMBRYONIC;LATE EMBRYONIC HISTONE H3;HISTONE H3, EMBRYONIC-LIKE;PUTATIVE HISTONE H3.3-LIKE TYPE 3;HISTONE H3;HISTONE H3.3
2917	PORTHOMCL2917[AjBfCgCiDrGgLvMmOjOlPsSpXl|(18 genes, 13 taxa)]:	-0.183187	0.0347692	0.259286	-0.120049	-0.0281053	-0.335577	-0.469688	-0.313706	-0.839735	-0.794861	-0.577696	-0.737431	LARGE2	B3GNT1;B4GAT1	B4GAT1	B4GAT1.L;B4GAT1	B4GAT1	B4GAT1	BETA-1,4-GLUCURONYLTRANSFERASE 1;BETA-1,4-GLUCURONYLTRANSFERASE 1-LIKE;BETA-1,4-GLUCURONYLTRANSFERASE 1, TRANSCRIPT VARIANT X2; BETA-1,4-GLUCURONYLTRANSFERASE 1, TRANSCRIPT VARIANT X1;BETA-1,4-GLUCURONYLTRANSFERASE 1-LIKE, TRANSCRIPT VARIANT X2; BETA-1,4-GLUCURONYLTRANSFERASE 1-LIKE, TRANSCRIPT VARIANT X1;LOC100181707	B4GAT1	B4GA1_DANRE;B4GAT1	PUTATIVE BETA-1,4-GLUCURONYLTRANSFERASE 1	B4GA1_DANRE;B4GAT1	BETA-1,4-GLUCURONYLTRANSFERASE 1;B4GAT1
6966	PORTHOMCL6966[BfCgCiDrGgLvMmOjOlPsSpXl|(13 genes, 12 taxa)]:	-0.548242	-0.736747	-0.408297	-0.361471	0.206838	0.321029	-0.778455	0.648182	-0.750794	-0.728854	-0.73223	-0.737293	TMEM33	TMEM33	TMEM33	TMEM33.S;TMEM33.L;TMEM33	TMEM33	TMEM33	TRANSMEMBRANE PROTEIN 33, TRANSCRIPT VARIANT X2; TRANSMEMBRANE PROTEIN 33, TRANSCRIPT VARIANT X1	TMEM33	TMM33_RAT;TMEM33		TMM33_RAT	TRANSMEMBRANE PROTEIN 33, TRANSCRIPT VARIANT X1; TRANSMEMBRANE PROTEIN 33, TRANSCRIPT VARIANT X2;TMEM33
4001	PORTHOMCL4001[AjBfCgCiDrGgLvMmOjOlPsSpXl|(16 genes, 13 taxa)]:	-0.199011	-0.610945	-0.749011	-0.0336275	-0.0589461	0.45	-0.849286	-0.28979	-0.859706	-0.786965	-0.564706	-0.737126	HDAC8	HDAC8	HDAC8	HDAC8.L;HDAC8	HDAC8	HDAC8;CITED1	HISTONE DEACETYLASE 8-LIKE;HDAC8	HDAC8	HDAC3_CHICK;HDAC1_STRPU;HDAC3;HDAC1	PUTATIVE HISTONE DEACETYLASE 8;HDAC8	HDAC8_DANRE;HDAC8_XENTR;HDAC8	HISTONE DEACETYLASE 8;HDAC8
758	PORTHOMCL758[AjBfCgCiDrGgLvMmOjOlPsSpXl|(33 genes, 13 taxa)]:	-0.215714	-0.604132	-0.317692	0.325858	0.122279	0.711265	-0.892338	0.717985	-0.870471	-0.737358	-0.602819	-0.736882	KMT5A	SETD8	KMT5A	KMT5A.L	KMT5AB;KMT5AA	SETD8A;SETD8B;KMT5A	N-LYSINE METHYLTRANSFERASE KMT5A-A		KMT5A_XENTR	HYPOTHETICAL PROTEIN;PUTATIVE N-LYSINE METHYLTRANSFERASE SETD8-B;PUTATIVE N-LYSINE METHYLTRANSFERASE SETD8-A-LIKE;PUTATIVE HISTONE-LYSINE N-METHYLTRANSFERASE PR-SET7-LIKE;PUTATIVE N-LYSINE METHYLTRANSFERASE SETD8-LIKE;PUTATIVE N-LYSINE METHYLTRANSFERASE SETD8-B ISOFORM X2;KMT5A	NSD2_MOUSE;KMT5A_HUMAN	N-LYSINE METHYLTRANSFERASE SETD8-B;N-LYSINE METHYLTRANSFERASE SETD8-B, TRANSCRIPT VARIANT X2; N-LYSINE METHYLTRANSFERASE SETD8-B, TRANSCRIPT VARIANT X1;UNCHARACTERIZED LOC105437736;KMT5A
6652	PORTHOMCL6652[AjBfCiDrGgLvMmOjPsSpXl|(13 genes, 11 taxa)]:	-0.672692	-0.797582	-0.621154	0.216078	0	-0.456824	-0.80439	0.0618881	-0.827941	-0.634902	-0.746904	-0.736582	PRIMPOL	CCDC111;PRIMPOL	PRIMPOL	PRIMPOL.L;PRIMPOL		PRIMPOL	DNA-DIRECTED PRIMASE/POLYMERASE PROTEIN-LIKE	PRIMPOL	PRIPO_MOUSE;PRIMPOL	PUTATIVE DNA-DIRECTED PRIMASE/POLYMERASE PROTEIN;PRIMPOL	PRIPO_HUMAN	DNA-DIRECTED PRIMASE/POLYMERASE PROTEIN;PRIMPOL
2983	PORTHOMCL2983[AjBfCgCiDrGgLvMmOjOlPsSpXl|(18 genes, 13 taxa)]:	-0.0898901	-0.570681	-0.525385	-0.0575	0.334069	0.667147	-0.916909	0	-0.716559	-0.775501	-0.717324	-0.736461	MYO5A	MYO19	MYO19	MYO19.S;MYO19	MYO19	MYO5B;MYO19	UNCONVENTIONAL MYOSIN-XIX, TRANSCRIPT VARIANT X2; UNCONVENTIONAL MYOSIN-XIX, TRANSCRIPT VARIANT X1;LOC100184296		MYO19_XENLA;MYO19	PUTATIVE UNCONVENTIONAL MYOSIN-XIX-LIKE;HYPOTHETICAL PROTEIN;MYO19	MYO19_MOUSE;MYO19	UNCONVENTIONAL MYOSIN-XIX;MYO19
4583	PORTHOMCL4583[AjBfCgCiDrGgLvMmOjOlPsSpXl|(15 genes, 13 taxa)]:	-0.483187	-0.694242	-0.882088	-0.114853	0.085	0.587029	-0.729805	0.461608	-0.877147	-0.71387	-0.616667	-0.735895	TCHP	TCHP	TCHP	TCHP.L;TCHP	TCHP	TCHP	TRICHOPLEIN KERATIN FILAMENT-BINDING PROTEIN-LIKE;TCHP	TCHP	TCHP_DANRE;TCHP	PUTATIVE TRICHOPLEIN KERATIN FILAMENT-BINDING PROTEIN-LIKE ISOFORM X2;TCHP	TCHP_DANRE	TRICHOPLEIN KERATIN FILAMENT-BINDING PROTEIN, TRANSCRIPT VARIANT X3; TRICHOPLEIN KERATIN FILAMENT-BINDING PROTEIN, TRANSCRIPT VARIANT X1; TRICHOPLEIN KERATIN FILAMENT-BINDING PROTEIN, TRANSCRIPT VARIANT X2;TCHP
3697	PORTHOMCL3697[AjBfCiDrGgLvMmOjOlPsSpXl|(16 genes, 12 taxa)]:	-0.10533	-0.813846	-0.707582	0.365172	0.330931	-0.264529	-0.929494	0.362587	-0.824353	-0.75709	-0.62598	-0.735808	MBTPS1	MBTPS1	MBTPS1	MBTPS1.L;MBTPS1	MBTPS1	MBTPS1	MEMBRANE-BOUND TRANSCRIPTION FACTOR SITE-1 PROTEASE;MBTPS1	MBTPS1	MBTP1_HUMAN;MBTPS1	PUTATIVE MEMBRANE-BOUND TRANSCRIPTION FACTOR SITE-1 PROTEASE	MBTP1_HUMAN;MBTPS1	MEMBRANE-BOUND TRANSCRIPTION FACTOR SITE-1 PROTEASE-LIKE;MEMBRANE-BOUND TRANSCRIPTION FACTOR SITE-1 PROTEASE;MBTPS1
1366	PORTHOMCL1366[AjBfCgCiDrGgLvMmOjOlPsSpXl|(25 genes, 13 taxa)]:	0.292802	-0.636615	-0.42522	-0.0641667	-0.000220588	0.0401471	-0.883468	0.575661	-0.858441	-0.746625	-0.602206	-0.735757	HEATR5B	HEATR5A;HEATR5B	HEATR5A;HEATR5B	LOC108699234;HEATR5B.L;HEATR5A;HEATR5B	HEATR5B	HEATR5B;HEATR5A	HEAT REPEAT-CONTAINING PROTEIN 5B-LIKE, TRANSCRIPT VARIANT X1; HEAT REPEAT-CONTAINING PROTEIN 5B-LIKE, TRANSCRIPT VARIANT X2;HEATR5B	HEATR5B	HTR5B_XENTR	PUTATIVE HEAT REPEAT-CONTAINING PROTEIN 5B	HTR5B_XENTR;HEATR5B	HEAT REPEAT-CONTAINING PROTEIN 5B;HEAT REPEAT-CONTAINING PROTEIN 5B-LIKE;HEATR5B
2591	PORTHOMCL2591[AjBfCgCiDrGgLvMmOjOlPsSpXl|(19 genes, 13 taxa)]:	-0.750934	-0.943912	-0.609396	-0.0468137	-0.221716	0.294265	-0.866364	0.25979	-0.755441	-0.803612	-0.646936	-0.73533	KIF11	KIF11	KIF11	KIF11.L;KIF11.S;KIF11	KIF11	KIF11;KIF3A	KINESIN-LIKE PROTEIN KIF11;KIF11		KIF11_HUMAN;KIF11	KINESIN-LIKE BOURSIN;PUTATIVE CENTROMERE-ASSOCIATED PROTEIN E;KIF11	KIF11_HUMAN;KIF11	KRP170, TRANSCRIPT VARIANT X1; KRP170;KIF11
4980	PORTHOMCL4980[AjCgCiDrGgLvMmOjOlPsSpXl|(15 genes, 12 taxa)]:	0.0312637	-0.418286	-0.578736	0.147941	-0.134804	0.699059	-0.867532	0	-0.776265	-0.828215	-0.600613	-0.735031	AEBP2	AEBP2	AEBP2	LOC108710174;LOC108706198;AEBP2	AEBP2;ZINC FINGER PROTEIN AEBP2-LIKE	AEBP2	ZINC FINGER PROTEIN		AEBP2_HUMAN	PUTATIVE ZINC FINGER PROTEIN;AEBP2	AEBP2_BOVIN;AEBP2	ZINC FINGER PROTEIN AEBP2;AEBP2
4538	PORTHOMCL4538[AjBfCgDrGgLvMmOjOlPsSpXl|(15 genes, 12 taxa)]:	0.168956	0.792835	0.456154	-0.355947	-0.760196	0.592265	0	0.793415	-0.872088	-0.816429	-0.516544	-0.735021	SLC45A3	SLC45A3	SLC45A3	SLC45A3.L;SLC45A3	ZGC:77158;SLC45A3	SLC45A3;ZGC:77158		SLC45A3	S45A3_HUMAN	PUTATIVE SOLUTE CARRIER FAMILY 45 MEMBER 3	S45A3_HUMAN	SOLUTE CARRIER FAMILY 45 MEMBER 3, TRANSCRIPT VARIANT X1; SOLUTE CARRIER FAMILY 45 MEMBER 3, TRANSCRIPT VARIANT X3; SOLUTE CARRIER FAMILY 45 MEMBER 3, TRANSCRIPT VARIANT X2
3602	PORTHOMCL3602[AjBfCgCiDrGgLvMmOjOlPsSpXl|(17 genes, 13 taxa)]:	-0.573187	-0.823516	-0.556044	-0.261544	-0.590711	-0.336324	-0.384636	-0.378574	-0.909029	-0.546398	-0.749632	-0.73502	PWP1	PWP1	PWP1	PWP1.S;PWP1	PWP1	PWP1	PERIODIC TRYPTOPHAN PROTEIN 1 HOMOLOG		PWP1_MOUSE;PWP1	HYPOTHETICAL PROTEIN;PWP1	PWP1_BOVIN;PWP1_MOUSE;PWP1	PERIODIC TRYPTOPHAN PROTEIN 1 HOMOLOG, TRANSCRIPT VARIANT X2; PERIODIC TRYPTOPHAN PROTEIN 1 HOMOLOG, TRANSCRIPT VARIANT X1;PERIODIC TRYPTOPHAN PROTEIN 1 HOMOLOG;PWP1
8778	PORTHOMCL8778[CiDrGgLvMmOjOlPsSpXl|(10 genes, 10 taxa)]:	-0.652198	-0.521275	-0.672582	-0.66625	-0.241373	0.113147	-0.833987	0	-0.781127	-0.744927	-0.678836	-0.734963	RAD54L	RAD54L	RAD54L	LOC108715578;RAD54L	RAD54L	RAD54L	DNA REPAIR AND RECOMBINATION PROTEIN RAD54-LIKE		RAD54_CHICK;RAD54L		RAD54_MOUSE	DNA REPAIR AND RECOMBINATION PROTEIN RAD54-LIKE
2088	PORTHOMCL2088[AjBfCgCiDrGgLvMmOjOlPsSpXl|(21 genes, 13 taxa)]:	0.0792857	-0.643121	-0.927308	0.134975	-0.0514706	0.448	-0.895623	-0.479033	-0.857294	-0.787472	-0.559069	-0.734611	ZCCHC11;ZCCHC6;TUT4;TUT7	ZCCHC11;ZCCHC6;TUT4;TUT7	ZCCHC11;ZCCHC6;TUT4;TUT7	ZCCHC11.L;ZCCHC6.L;TUT4;TUT7	TUT4;TUT7	CABZ01065131.1;CABZ01032476.1;TUT4;ZCCHC6	ZINC FINGER (CCHC/C2H2)-1, TRANSCRIPT VARIANT X1; ZINC FINGER (CCHC/C2H2)-1, TRANSCRIPT VARIANT X3; ZINC FINGER (CCHC/C2H2)-1, TRANSCRIPT VARIANT X4; ZINC FINGER (CCHC/C2H2)-1, TRANSCRIPT VARIANT X2;TERMINAL URIDYLYLTRANSFERASE 7-LIKE, TRANSCRIPT VARIANT X1; TERMINAL URIDYLYLTRANSFERASE 7-LIKE, TRANSCRIPT VARIANT X2;ZCCHC11		TUT4_MOUSE	PUTATIVE TERMINAL URIDYLYLTRANSFERASE 4 ISOFORM X4	TUT4_MOUSE	TERMINAL URIDYLYLTRANSFERASE 7
8834	PORTHOMCL8834[DrGgLvMmOjOlPsSpXl|(10 genes, 9 taxa)]:	-0.1454	-0.619912	-0.558077	0.145882	-0.180466	-0.691029	0	0	-0.834118	-0.702766	-0.666789	-0.734558	DCP1A	DCP1A	DCP1A	LOC108704027;DCP1A.S;DCP1A	DCP1A	DCP1A			DCP1A_MOUSE		DCP1B_BOVIN	MRNA-DECAPPING ENZYME 1B
4443	PORTHOMCL4443[AjBfCgCiDrGgLvMmOjOlPsSpXl|(15 genes, 13 taxa)]:	-0.0228571	-0.833626	-0.593132	-0.287672	-0.773922	0.358529	-0.0470909	0.869301	-0.849029	-0.656347	-0.697672	-0.734349	TELO2	TELO2	TELO2	TELO2.L;TELO2	TELO2	TELO2	TELOMERE LENGTH REGULATION PROTEIN TEL2 HOMOLOG, TRANSCRIPT VARIANT X1; TELOMERE LENGTH REGULATION PROTEIN TEL2 HOMOLOG, TRANSCRIPT VARIANT X2	TELO2	TELO2_XENLA;TELO2	PUTATIVE TELOMERE LENGTH REGULATION PROTEIN TEL2-LIKE ISOFORM X1;TELO2	TELO2_MOUSE	TELOMERE LENGTH REGULATION PROTEIN TEL2 HOMOLOG, TRANSCRIPT VARIANT X2; TELOMERE LENGTH REGULATION PROTEIN TEL2 HOMOLOG, TRANSCRIPT VARIANT X1;TELO2
6817	PORTHOMCL6817[AjBfCgCiDrGgLvMmOjOlPsSpXl|(13 genes, 13 taxa)]:	-0.427143	-0.581275	-0.913187	0.54299	-0.469093	0.462824	-0.843234	-0.632463	-0.723265	-0.828916	-0.650735	-0.734305	SMG6	SMG6	SMG6	LOC108707965;SMG6	SMG6	SMG6	TELOMERASE-BINDING PROTEIN EST1A	SMG6	EST1A_HUMAN	PUTATIVE TELOMERASE-BINDING PROTEIN EST1A ISOFORM X2	EST1A_MOUSE;SMG6	TELOMERASE-BINDING PROTEIN EST1A, TRANSCRIPT VARIANT X1; TELOMERASE-BINDING PROTEIN EST1A, TRANSCRIPT VARIANT X2
5579	PORTHOMCL5579[AjBfCgDrLvMmOjOlPsSpXl|(14 genes, 11 taxa)]:	0	-0.30356	-0.58956	0.222843	0.142451	0.136206	0	-0.0852448	-0.883088	-0.644809	-0.674877	-0.734258		RNASEH2A	RNASEH2A	RNASEH2A.L;RNASEH2A	RNASEH2A	RNASEH2A		RNASEH2A	RNH2A_BOVIN;RNASEH2A	PUTATIVE RIBONUCLEASE H2 SUBUNIT A	RNH2A_BOVIN	RIBONUCLEASE H2 SUBUNIT A
15359	PORTHOMCL15359[LvOjSp|(4 genes, 3 taxa)]:	0	0	0	0	0	0	0	0	-0.626412	-0.860764	-0.715319	-0.734165									CDC26_DANRE		CDC26_DANRE	ANAPHASE-PROMOTING COMPLEX SUBUNIT CDC26-LIKE
3039	PORTHOMCL3039[AjBfCgCiDrGgLvMmOjOlPsSpXl|(18 genes, 13 taxa)]:	-0.0447802	-0.585495	-0.052967	0.392328	-0.420343	0.450206	-0.838948	-0.774263	-0.699029	-0.837688	-0.665196	-0.733971	CCDC47	CCDC47	CCDC47	CCDC47.L;CCDC47.S;CCDC47	CCDC47	CCDC47	COILED-COIL DOMAIN-CONTAINING PROTEIN 47-LIKE;CCDC47	CCDC47	CCD47_PONAB	PUTATIVE COILED-COIL DOMAIN-CONTAINING PROTEIN;CCDC47	CCD47_DANRE;CCD47_PONAB	COILED-COIL DOMAIN-CONTAINING PROTEIN 47;CCDC47
4287	PORTHOMCL4287[BfCgCiDrGgLvMmOjOlPsSpXl|(16 genes, 12 taxa)]:	0.435165	-0.54167	-0.00247253	0.173814	0.0768137	0.792353	-0.644182	-0.0846154	-0.861618	-0.811992	-0.527574	-0.733728	AAK1	AAK1	AAK1;BMP2K	LOC108712220	BMP2K;AAK1A;AAK1B	BMP2K;AAK1B	AP2-ASSOCIATED PROTEIN KINASE 1-LIKE;BMP2K		AAK1_HUMAN		AAK1_BOVIN	AP2-ASSOCIATED PROTEIN KINASE 1;BMP2K
7231	PORTHOMCL7231[AjCgCiDrGgLvMmOjOlPsSpXl|(12 genes, 12 taxa)]:	0.637857	0.0404396	0.479822	-0.327203	-0.148799	-0.339362	-0.90087	0	-0.937118	-0.610733	-0.653309	-0.73372		RPS6KL1	RPS6KL1	LOC108698674	RPS6KL1	RPS6KL1	RIBOSOMAL PROTEIN S6 KINASE DELTA-1-LIKE		KS6C1_HUMAN	PUTATIVE RIBOSOMAL PROTEIN S6 KINASE DELTA-1	KS6C1_MOUSE	RIBOSOMAL PROTEIN S6 KINASE DELTA-1
3565	PORTHOMCL3565[AjBfCgCiDrGgLvMmOjOlPsSpXl|(17 genes, 13 taxa)]:	0.0408242	-0.856176	-0.779011	0.410784	0.764583	0.433853	-0.663896	0.432867	-0.589882	-0.914448	-0.695343	-0.733224	TMEM237	TMEM237	TMEM237	LOC108701441;TMEM237.L;TMEM237	TMEM237B;TMEM237 (1 OF MANY)	TMEM237A;TMEM237B	TRANSMEMBRANE PROTEIN 237, TRANSCRIPT VARIANT X2; TRANSMEMBRANE PROTEIN 237, TRANSCRIPT VARIANT X3; TRANSMEMBRANE PROTEIN 237, TRANSCRIPT VARIANT X1;LOC100180281		T237A_DANRE	PUTATIVE TRANSMEMBRANE PROTEIN	TM237_CHICK	TRANSMEMBRANE PROTEIN 237
6819	PORTHOMCL6819[AjBfCgCiDrGgLvMmOjOlPsSpXl|(13 genes, 13 taxa)]:	-0.39478	-0.762725	-0.572967	-0.193922	0.135564	0.0444412	-0.887091	-0.0102098	-0.770765	-0.776326	-0.65049	-0.732527	LIN54	LIN54	LIN54	LIN54.S;LIN54	LIN54	LIN54	PROTEIN LIN-54 HOMOLOG		LIN54_HUMAN;LIN54	HYPOTHETICAL PROTEIN	LIN54_PONAB	PROTEIN LIN-54 HOMOLOG, TRANSCRIPT VARIANT X2; PROTEIN LIN-54 HOMOLOG, TRANSCRIPT VARIANT X1; PROTEIN LIN-54 HOMOLOG, TRANSCRIPT VARIANT X3;LIN54
4774	PORTHOMCL4774[AjBfCgCiDrGgLvMmOjOlPsSpXl|(15 genes, 13 taxa)]:	-0.621209	-0.876659	-0.730989	0.376078	0.0388971	0.71	-0.823299	0.241329	-0.789147	-0.778142	-0.629779	-0.732356	TPX2	TPX2	TPX2	TPX2.S;TPX2.L;TPX2	TPX2	TPX2	TARGETING PROTEIN FOR XKLP2, TRANSCRIPT VARIANT X1; TARGETING PROTEIN FOR XKLP2, TRANSCRIPT VARIANT X2	TPX2	TPX2_PATPE	TARGETING PROTEIN FOR XKLP2-LIKE	TPX2_PATPE	TARGETING PROTEIN FOR XKLP2 HOMOLOG;TPX2
5534	PORTHOMCL5534[AjBfCgCiDrGgLvMmOjOlPsSpXl|(14 genes, 13 taxa)]:	-0.533846	-0.830769	-0.550495	-0.0642721	-0.149681	0.0717941	-0.758857	-0.214965	-0.856848	-0.810526	-0.529486	-0.732287	POP1	POP1	POP1	POP1-LIKE.L;POP1	POP1	POP1	RIBONUCLEASES P/MRP PROTEIN SUBUNIT POP1, TRANSCRIPT VARIANT X2; RIBONUCLEASES P/MRP PROTEIN SUBUNIT POP1, TRANSCRIPT VARIANT X1;LOC100175786		POP1_HUMAN	PUTATIVE RIBONUCLEASES P/MRP PROTEIN SUBUNIT POP1-LIKE	POP1_HUMAN	RIBONUCLEASES P/MRP PROTEIN SUBUNIT POP1
3948	PORTHOMCL3948[AjCiDrGgLvMmOjOlSp|(16 genes, 9 taxa)]:	-0.696264	0	0	0	-0.718941	-0.376353	-0.640896	0	-0.798588	-0.664066	-0.733824	-0.732159	TBL1X		DAW1		DAW1	TBL1XR1A;TBL1X	DYNEIN ASSEMBLY FACTOR WITH WDR REPEAT DOMAINS 1-LIKE;DAW1		DAW1_XENTR	HYPOTHETICAL PROTEIN;PUTATIVE F-BOX-LIKE/WD REPEAT-CONTAINING PROTEIN TBL1XR1;DAW1;TBL1X	DAW1_XENTR;DAW1_BOVIN;DAW1	DYNEIN ASSEMBLY FACTOR WITH WDR REPEAT DOMAINS 1;DYNEIN ASSEMBLY FACTOR WITH WDR REPEAT DOMAINS 1-LIKE;DAW1
5864	PORTHOMCL5864[AjBfCgCiDrGgLvMmOjOlPsSpXl|(14 genes, 13 taxa)]:	-0.501703	-0.809231	-0.539176	0.113186	-0.557892	-0.415706	0.417312	0.678811	-0.878294	-0.744933	-0.570098	-0.731108	PAK1IP1	PAK1IP1	PAK1IP1	PAK1IP1.S;MGC114939;PAK1IP1	PAK1IP1	PAK1IP1	P21-ACTIVATED PROTEIN KINASE-INTERACTING PROTEIN 1-LIKE		PK1IP_XENLA;PAK1IP1	PUTATIVE P21-ACTIVATED PROTEIN KINASE-INTERACTING PROTEIN 1-LIKE ISOFORM X1;PAK1IP1	PK1IP_XENLA;PAK1IP1	P21-ACTIVATED PROTEIN KINASE-INTERACTING PROTEIN 1-LIKE, TRANSCRIPT VARIANT X2; P21-ACTIVATED PROTEIN KINASE-INTERACTING PROTEIN 1-LIKE, TRANSCRIPT VARIANT X1;PAK1IP1
3215	PORTHOMCL3215[AjBfCgCiDrGgLvMmOjOlPsSpXl|(17 genes, 13 taxa)]:	-0.185989	-0.802286	-0.522637	-0.0499755	0.118873	-0.238402	-0.669987	-0.74825	-0.719765	-0.845071	-0.628309	-0.731048	EFL1	EFTUD1;EFL1	EFL1	EFL1.L	EEF2B;EFL1	EFTUD1;EFL1	ELONGATION FACTOR-LIKE GTPASE 1, TRANSCRIPT VARIANT X2; ELONGATION FACTOR-LIKE GTPASE 1, TRANSCRIPT VARIANT X1;EFL1	EFL1	EFL1_HUMAN;EFL1	PUTATIVE ELONGATION FACTOR TU GTP-BINDING DOMAIN-CONTAINING PROTEIN 1;PUTATIVE ELONGATION FACTOR TU GTP-BINDING DOMAIN-CONTAINING PROTEIN 1-LIKE;EFTUD1	EFL1_HUMAN	ELONGATION FACTOR TU GTP-BINDING DOMAIN-CONTAINING PROTEIN 1
2604	PORTHOMCL2604[AjBfCgCiDrGgLvMmOjOlPsSpXl|(19 genes, 13 taxa)]:	-0.586099	-0.892308	0.385386	-0.0769118	-0.21896	-0.670445	0.0858831	0.70972	-0.883471	-0.754386	-0.554657	-0.730838	MAPK15	MAPK15	MAPK15	MAPK15.L	MAPK15	MAPK15	EXTRACELLULAR SIGNAL-REGULATED KINASE 2-LIKE, TRANSCRIPT VARIANT X1; EXTRACELLULAR SIGNAL-REGULATED KINASE 2-LIKE, TRANSCRIPT VARIANT X2		YPC2_CAEEL	PUTATIVE EXTRACELLULAR SIGNAL-REGULATED KINASE 2;PUTATIVE SERINE/THREONINE-PROTEIN KINASE	YPC2_CAEEL;MK15_HUMAN	EXTRACELLULAR SIGNAL-REGULATED KINASE 2;PUTATIVE SERINE/THREONINE-PROTEIN KINASE C05D10.2
5004	PORTHOMCL5004[AjBfCgCiDrGgLvMmOjOlPsSpXl|(15 genes, 13 taxa)]:	-0.423516	-0.515077	0.47511	-0.204779	0.00980392	-0.388324	-0.592494	0.447762	-0.842912	-0.737399	-0.612132	-0.730814	DLST	DLST	DLST	DLST.S;LOC108698673;DLST	DLST	DLST	DIHYDROLIPOYLLYSINE-RESIDUE SUCCINYLTRANSFERASE COMPONENT OF 2-OXOGLUTARATE DEHYDROGENASE COMPLEX, MITOCHONDRIAL;DLST		ODO2_PIG	HYPOTHETICAL PROTEIN;PUTATIVE DIHYDROLIPOYLLYSINE-RESIDUE SUCCINYLTRANSFERASE;DLST	ODO2_TAKRU	DIHYDROLIPOYLLYSINE-RESIDUE SUCCINYLTRANSFERASE COMPONENT OF 2-OXOGLUTARATE DEHYDROGENASE COMPLEX, MITOCHONDRIAL
3232	PORTHOMCL3232[AjBfCgCiDrGgLvMmOjOlPsSpXl|(17 genes, 13 taxa)]:	-0.44511	-0.725934	-0.543352	-0.136275	0.113578	0.343235	-0.859338	-0.462966	-0.865088	-0.599628	-0.727451	-0.730723	DDX10	DDX10	DDX10	DDX10.L;DDX10	DDX10	DDX18;DDX10	PROBABLE ATP-DEPENDENT RNA HELICASE DDX10;DDX10	DDX10	DDX10_MOUSE;DDX10	PUTATIVE ATP-DEPENDENT RNA HELICASE DDX10;PUTATIVE ATP-DEPENDENT RNA HELICASE DDX10-LIKE;DDX10	DDX10_MOUSE;DDX10	PROBABLE ATP-DEPENDENT RNA HELICASE DDX10;DDX10
6242	PORTHOMCL6242[AjBfDrGgLvMmOjOlPsSpXl|(13 genes, 11 taxa)]:	0.296264	-0.521846	-0.83	-0.883824	0.183015	-0.0557353	0	-0.701678	-0.685912	-0.755497	-0.750554	-0.730654	DHX30	DHX30	DHX30	DHX30.S;DHX30	DHX30	DHX30		DHX36	DHX30_CHICK;DHX30	PUTATIVE ATP-DEPENDENT RNA HELICASE DHX30;DHX30	DHX30_RAT;DHX30	PUTATIVE ATP-DEPENDENT RNA HELICASE DHX30;DHX30
6412	PORTHOMCL6412[AjBfCgCiDrGgLvMmOjOlPsSpXl|(13 genes, 13 taxa)]:	0.173352	0.00127473	-0.763846	0	0.0671814	0.221735	-0.710506	0.635245	-0.763706	-0.702188	-0.722672	-0.729522	PPP2R4;PTPA	PPP2R4;PTPA	PTPA	PPP2R4-LIKE.S	PTPA	PPP2R4;PTPA	SERINE/THREONINE-PROTEIN PHOSPHATASE 2A ACTIVATOR-LIKE;PTPA	PTPA	PTPA_MOUSE;PTPA	PUTATIVE SERINE/THREONINE-PROTEIN PHOSPHATASE 2A ACTIVATOR-LIKE;PTPA	PTPA_MOUSE	SERINE/THREONINE-PROTEIN PHOSPHATASE 2A ACTIVATOR;PTPA
3886	PORTHOMCL3886[AjBfCgCiDrGgLvMmOjOlPsSpXl|(16 genes, 13 taxa)]:	-0.500989	-0.570418	-0.551374	-0.665417	-0.546544	-0.237088	-0.706468	-0.509161	-0.922912	-0.852405	-0.413235	-0.729517	MAK16	MAK16	MAK16	MAK16.S;MAK16.L	MAK16	MAK16	PROTEIN MAK16 HOMOLOG		MAK16_HUMAN	HYPOTHETICAL PROTEIN	MAK16_BOVIN	PROTEIN MAK16 HOMOLOG
4649	PORTHOMCL4649[AjBfCgCiDrGgLvMmOjOlPsSpXl|(15 genes, 13 taxa)]:	-0.636813	-0.80378	-0.76511	0.101275	-0.371814	0.208912	-0.745584	-0.155105	-0.857176	-0.732962	-0.598162	-0.729433	GINS2	GINS2	GINS2	GINS2.L;GINS2	GINS2	GINS2	DNA REPLICATION COMPLEX GINS PROTEIN PSF2-LIKE, TRANSCRIPT VARIANT X2;GINS2	GINS2	PSF2_HUMAN;GINS2	PUTATIVE DNA REPLICATION COMPLEX GINS PROTEIN PSF2-LIKE;GINS2	PSF2_XENLA;GINS2	DNA REPLICATION COMPLEX GINS PROTEIN PSF2-LIKE;GINS2
6729	PORTHOMCL6729[AjBfDrGgLvMmOjOlPsSpXl|(13 genes, 11 taxa)]:	-0.529725	-0.765582	-0.502802	-0.87652	-0.741789	0.0111471	0	-0.495241	-0.661765	-0.891847	-0.632721	-0.728778	LRPPRC	LRPPRC	LRPPRC	LRPPRC.L;LRPPRC	LRPPRC	LRPPRC			LPPRC_XENTR	PUTATIVE LEUCINE-RICH PPR MOTIF-CONTAINING PROTEIN	LPPRC_XENTR	LEUCINE-RICH PPR MOTIF-CONTAINING PROTEIN, MITOCHONDRIAL;LRPPRC
8651	PORTHOMCL8651[AjBfCgDrLvOjOlSpXl|(10 genes, 9 taxa)]:	0	0	0	-0.156078	0.0351716	0.719382	0	0.661174	-0.728618	-0.812817	-0.644608	-0.728681				LOC100126636.S	KRCP	KRCP			LPH_RABIT	HYPOTHETICAL PROTEIN	TEA1_SCHPO	UNCHARACTERIZED LOC588391
3385	PORTHOMCL3385[AjBfDrGgLvMmOjOlPsSpXl|(17 genes, 11 taxa)]:	-0.317418	-0.546418	-0.587582	-0.0274265	0.130564	0.0439118	0	-0.480384	-0.820353	-0.603488	-0.761029	-0.72829	METTL8	METTL8	METTL2;METTL8	METTL6.L;METTL6	METTL2A;METTL8	METTL8			MEL2A_DANRE	HYPOTHETICAL PROTEIN;PUTATIVE METHYLTRANSFERASE-LIKE PROTEIN 2-A-LIKE	MEL2A_DANRE	METHYLTRANSFERASE-LIKE PROTEIN 2;METTL2A
3983	PORTHOMCL3983[AjBfCgCiDrGgLvMmOjOlPsSpXl|(16 genes, 13 taxa)]:	-0.0309341	-0.330505	-0.0464286	-0.145245	-0.567868	0.338765	-0.594558	0.153007	-0.877706	-0.768091	-0.538603	-0.728133	TMEM259	TMEM259	TMEM259	TMEM259.S;TMEM259.L;TMEM259	TMEM259	TMEM259	MEMBRALIN-LIKE, TRANSCRIPT VARIANT X2; MEMBRALIN-LIKE, TRANSCRIPT VARIANT X1	TMEM259	MBRL_HUMAN;TMEM259	PUTATIVE MEMBRALIN;PUTATIVE MEMBRALIN-LIKE;TMEM259	MBRL_HUMAN;TMEM259	MEMBRALIN;TMEM259
7363	PORTHOMCL7363[AjBfCgCiDrGgLvMmOjOlPsSp|(12 genes, 12 taxa)]:	-0.393846	-0.91578	-0.518352	0	0.112353	0.546559	0.360693	-0.268112	-0.883412	-0.732887	-0.564461	-0.72692	TRMT11	TRMT11	TRMT11		TRMT11	TRMT11	TRNA (GUANINE(10)-N2)-METHYLTRANSFERASE HOMOLOG, TRANSCRIPT VARIANT X1; TRNA (GUANINE(10)-N2)-METHYLTRANSFERASE HOMOLOG, TRANSCRIPT VARIANT X2;TRMT11	TRMT11	TRM11_HUMAN;TRMT11	PUTATIVE TRNA (GUANINE(10)-N2)-METHYLTRANSFERASE-LIKE;TRMT11	TRM11_MOUSE	TRNA (GUANINE(10)-N2)-METHYLTRANSFERASE HOMOLOG;TRMT11
4099	PORTHOMCL4099[AjBfCgCiDrGgLvMmOjOlPsSpXl|(16 genes, 13 taxa)]:	-0.132483	0.463034	0.856783	-0.282794	0.652574	0.244088	-0.936143	0.237902	-0.711088	-0.917385	-0.550735	-0.726403	SLC17A9	SLC17A9	SLC17A9	SLC17A9.L;SLC17A9.S;SLC17A9	SLC17A9B;SLC17A9 (1 OF MANY)	SLC17A9B;SLC17A9A	SOLUTE CARRIER FAMILY 17 MEMBER 9-LIKE;SLC17A9		S17A9_MOUSE	PUTATIVE SOLUTE CARRIER FAMILY 17 MEMBER 9 ISOFORM X3	S17A9_HUMAN	SOLUTE CARRIER FAMILY 17 MEMBER 9, TRANSCRIPT VARIANT X2; SOLUTE CARRIER FAMILY 17 MEMBER 9, TRANSCRIPT VARIANT X9; SOLUTE CARRIER FAMILY 17 MEMBER 9, TRANSCRIPT VARIANT X4; SOLUTE CARRIER FAMILY 17 MEMBER 9, TRANSCRIPT VARIANT X1; SOLUTE CARRIER FAMILY 17 MEMBER 9, TRANSCRIPT VARIANT X5; SOLUTE CARRIER FAMILY 17 MEMBER 9, TRANSCRIPT VARIANT X3; SOLUTE CARRIER FAMILY 17 MEMBER 9, TRANSCRIPT VARIA…
1563	PORTHOMCL1563[AjBfCgCiDrGgLvMmOjOlPsSpXl|(24 genes, 13 taxa)]:	0.14478	-0.713714	-0.822363	-0.269665	-0.647097	0.383265	-0.71361	0.389632	-0.813265	-0.711538	-0.65371	-0.726171	MINDY4;MINDY4B	FAM188B;FAM188B2;MINDY4	FAM188B;MINDY4	LOC108717589;LOC108717059;MINDY4B	SI:DKEY-30H22.11;MINDY4	MINDY4;FAM188B2;MINDY4B	PROBABLE UBIQUITIN CARBOXYL-TERMINAL HYDROLASE FAM188B;PROTEIN FAM188B2-LIKE;MINDY4	MINDY4	F188B_XENTR;MINDY4	HYPOTHETICAL PROTEIN;MINDY4	F188B_MOUSE	PROTEIN FAM188B
4614	PORTHOMCL4614[AjBfCgCiDrGgLvMmOjOlPsSpXl|(15 genes, 13 taxa)]:	-0.401154	-0.788879	-0.544011	-0.0804902	-0.380441	-0.135647	-0.691091	0.381958	-0.896882	-0.590691	-0.690686	-0.726087	KRR1	KRR1	KRR1	KRR1.S;KRR1	KRR1	KRR1	KRR1 SMALL SUBUNIT PROCESSOME COMPONENT HOMOLOG, TRANSCRIPT VARIANT X1; KRR1 SMALL SUBUNIT PROCESSOME COMPONENT HOMOLOG, TRANSCRIPT VARIANT X2;KRR1	KRR1	KRR1_MOUSE	PUTATIVE KRR1 SMALL SUBUNIT PROCESSOME COMPONENT-LIKE;KRR1	KRR1_MOUSE;KRR1_DROGR;KRR1	KRR1 SMALL SUBUNIT PROCESSOME COMPONENT HOMOLOG;KRR1
4568	PORTHOMCL4568[AjBfCiDrGgLvMmOjOlPsSpXl|(15 genes, 12 taxa)]:	-0.000384615	-0.634418	-0.412857	-0.543407	0.0660784	0.646559	-0.728026	-0.761531	-0.877118	-0.578555	-0.722502	-0.726058		PORCN	PORCN	PORCN.L;PORCN	PROTEIN-SERINE O-PALMITOLEOYLTRANSFERASE PORCUPINE;PORCN	PORCNL;PORCN	PROTEIN-SERINE O-PALMITOLEOYLTRANSFERASE PORCUPINE	PORCN	PORCN_HUMAN	PUTATIVE PROTEIN-CYSTEINE N-PALMITOYLTRANSFERASE PORCUPINE	PORCN_HUMAN	PROTEIN-CYSTEINE N-PALMITOYLTRANSFERASE PORCUPINE, TRANSCRIPT VARIANT X2; PROTEIN-CYSTEINE N-PALMITOYLTRANSFERASE PORCUPINE, TRANSCRIPT VARIANT X1;PROTEIN-CYSTEINE N-PALMITOYLTRANSFERASE PORCUPINE-LIKE
4755	PORTHOMCL4755[AjBfCgCiDrGgLvMmOjOlPsSpXl|(15 genes, 13 taxa)]:	-0.493407	-0.692527	-0.539505	-0.121176	-0.0543873	-0.134265	-0.773779	0.377273	-0.817353	-0.784954	-0.575858	-0.726055	NOP14	NOP14	NOP14	NOP14.L;NOP14	NOP14	NOP14	NUCLEOLAR PROTEIN 14-LIKE;NOP14		NOP14_HUMAN;NOP14	PUTATIVE NUCLEOLAR PROTEIN 14;NOP14	NOP14_HUMAN;NOP14	NUCLEOLAR PROTEIN 14;NOP14
4432	PORTHOMCL4432[AjBfCgCiDrGgLvMmOjOlPsSpXl|(15 genes, 13 taxa)]:	0.0215385	-0.51978	-0.575769	0.42375	0.0152941	0.662971	-0.322818	0.503497	-0.853382	-0.808277	-0.515319	-0.725659	METTL3	METTL3	METTL3	METTL3.L;METTL3	METTL3	METTL3	N6-ADENOSINE-METHYLTRANSFERASE SUBUNIT METTL3-LIKE	METTL3	MTA70_HUMAN;METTL3	PUTATIVE N6-ADENOSINE-METHYLTRANSFERASE SUBUNIT METTL3;METTL3	MTA70_HUMAN	N6-ADENOSINE-METHYLTRANSFERASE SUBUNIT METTL3;METTL3
2137	PORTHOMCL2137[AjBfCgCiDrGgLvMmOjOlPsSpXl|(21 genes, 13 taxa)]:	-0.426429	-0.679516	-0.575165	0.364632	-0.0129167	-0.517912	-0.771234	-0.642542	-0.824941	-0.810877	-0.540686	-0.725502	TAF4;TAF4B	TAF4B;TAF4	TAF4;TAF4B	TAF4B.S;LOC108702623;TAF4B.L;TAF4;TAF4B	TRANSCRIPTION INITIATION FACTOR TFIID SUBUNIT 4;TAF4A	TAF4A;TAF4B;TAF4	TRANSCRIPTION INITIATION FACTOR TFIID SUBUNIT 4-LIKE, TRANSCRIPT VARIANT X1; TRANSCRIPTION INITIATION FACTOR TFIID SUBUNIT 4-LIKE, TRANSCRIPT VARIANT X2; TRANSCRIPTION INITIATION FACTOR TFIID SUBUNIT 4-LIKE, TRANSCRIPT VARIANT X3	TAF4	TAF4_HUMAN	PUTATIVE TRANSCRIPTION INITIATION FACTOR TFIID SUBUNIT 4-LIKE ISOFORM X2	TAF4_HUMAN	TRANSCRIPTION INITIATION FACTOR TFIID SUBUNIT 4;TAF4
5716	PORTHOMCL5716[AjBfCgLvOjSpXl|(14 genes, 7 taxa)]:	0	0	0	0	0	0	0	-0.031198	-0.847572	-0.771104	-0.557598	-0.725425				LOC105946344.L						HYPOTHETICAL PROTEIN		UNCHARACTERIZED LOC575928, TRANSCRIPT VARIANT X1; UNCHARACTERIZED LOC575928, TRANSCRIPT VARIANT X2
14990	PORTHOMCL14990[AjLvOjSp|(4 genes, 4 taxa)]:	0	0	0	0	0	0	0	0	-0.725088	-0.779319	-0.671691	-0.725366										HYPOTHETICAL PROTEIN		UNCHARACTERIZED LOC100893940
16594	PORTHOMCL16594[LvOjSp|(3 genes, 3 taxa)]:	0	0	0	0	0	0	0	0	-0.736029	-0.734283	-0.705515	-0.725276									DSRAD_RAT		ADAD1_RAT	UNCHARACTERIZED LOC764750
9952	PORTHOMCL9952[AjBfCgLvOjSp|(8 genes, 6 taxa)]:	0	0	0	0	0	0	0	0.47965	-0.80959	-0.75461	-0.610662	-0.724954									SLF1_HUMAN	PUTATIVE ANKYRIN REPEAT DOMAIN-CONTAINING PROTEIN 32-LIKE	SLF1_MOUSE	ANKYRIN REPEAT DOMAIN-CONTAINING PROTEIN 32;TANKYRASE-2
5767	PORTHOMCL5767[AjBfCgCiDrGgLvMmOjOlPsSp|(14 genes, 12 taxa)]:	-0.267637	-0.33789	-0.518846	0	-0.619828	0.120618	-0.83326	-0.134559	-0.708206	-0.775315	-0.690564	-0.724695	NOB1	NOB1	NOB1		NOB1	NOB1	RNA-BINDING PROTEIN NOB1-LIKE;NOB1	NOB1	NOB1_HUMAN;NOB1	PUTATIVE RNA-BINDING PROTEIN NOB1	NOB1_PONAB	RNA-BINDING PROTEIN NOB1
6542	PORTHOMCL6542[AjBfCgDrLvMmOjPsSpXl|(13 genes, 10 taxa)]:	0	-0.625109	-0.918407	-0.128162	0	-0.735147	0	-0.722442	-0.808147	-0.742766	-0.622672	-0.724528		TTC23L	TTC23;TTC23L	TTC23L.L;TTC23L		TTC23			TTC23_RAT	PUTATIVE TETRATRICOPEPTIDE REPEAT PROTEIN 23;HYPOTHETICAL PROTEIN	TTC23_RAT	TETRATRICOPEPTIDE REPEAT PROTEIN 23
10952	PORTHOMCL10952[AjBfCgLvOjSp|(7 genes, 6 taxa)]:	0	0	0	0	0	0	0	0.43993	-0.804441	-0.719112	-0.648775	-0.724109									PF23B_DANRE	PUTATIVE PHD FINGER PROTEIN 13	PHF13_HUMAN	PHD FINGER PROTEIN 13
6531	PORTHOMCL6531[AjBfCgCiDrGgLvMmOjOlPsSpXl|(13 genes, 13 taxa)]:	-0.425495	-0.725275	-0.551868	-0.0161275	0.0809314	0.0190882	-0.876975	0.687343	-0.848088	-0.750774	-0.573407	-0.72409	TRIP13	TRIP13	TRIP13	TRIP13.L;TRIP13	TRIP13	TRIP13	PACHYTENE CHECKPOINT PROTEIN 2 HOMOLOG;TRIP13	TRIP13	PCH2_CHICK;TRIP13	PACHYTENE CHECKPOINT 2-LIKE PROTEIN;TRIP13	PCH2_CHICK;TRIP13	PACHYTENE CHECKPOINT PROTEIN 2 HOMOLOG, TRANSCRIPT VARIANT X1; PACHYTENE CHECKPOINT PROTEIN 2 HOMOLOG, TRANSCRIPT VARIANT X2;TRIP13
14876	PORTHOMCL14876[AjLvOjSp|(4 genes, 4 taxa)]:	0	0	0	0	0	0	0	0	-0.897941	-0.544877	-0.729167	-0.723995									CEP70_RAT	HYPOTHETICAL PROTEIN	CEP70_MACFA	UNCHARACTERIZED LOC579733, TRANSCRIPT VARIANT X1; UNCHARACTERIZED LOC579733, TRANSCRIPT VARIANT X4; UNCHARACTERIZED LOC579733, TRANSCRIPT VARIANT X2; UNCHARACTERIZED LOC579733, TRANSCRIPT VARIANT X3
2258	PORTHOMCL2258[AjBfCgCiDrGgLvMmOjOlPsSpXl|(20 genes, 13 taxa)]:	0.344451	-0.430901	-0.792198	-0.138897	-0.193652	0.684588	-0.878013	-0.574543	-0.825441	-0.818266	-0.528186	-0.723965	HCFC2	HCFC2	HCFC1;HCFC2	HCFC1.S;HCFC2.L;HCFC2	HCFC1A;HCFC2	HCFC1B;HCFC1A;HCFC2;HCFC1	HOST CELL FACTOR 2-LIKE		HCFC1_HUMAN;LOC106180476	PUTATIVE HOST CELL FACTOR 1 ISOFORM X2	HCFC1_HUMAN	HOST CELL FACTOR 2, TRANSCRIPT VARIANT X3; HOST CELL FACTOR 2, TRANSCRIPT VARIANT X4; HOST CELL FACTOR 2, TRANSCRIPT VARIANT X2; HOST CELL FACTOR 2, TRANSCRIPT VARIANT X1
5506	PORTHOMCL5506[AjBfCgCiDrGgLvMmOjOlSpXl|(14 genes, 12 taxa)]:	-0.356758	0	-0.549396	-0.111103	0.0722304	0.302294	-0.328701	-0.424871	-0.906882	-0.663983	-0.600858	-0.723908			NOP9	NOP9.L;NOP9	NOP9 NUCLEOLAR PROTEIN;NOP9	NOP9	NUCLEOLAR PROTEIN 9;LOC100184690		NOP9_HUMAN	PUTATIVE NUCLEOLAR PROTEIN 9	NOP9_MOUSE	NUCLEOLAR PROTEIN 9
5341	PORTHOMCL5341[AjBfCgCiDrLvOjOlPsSpXl|(14 genes, 11 taxa)]:	0	-0.691429	0	0.20973	-0.147917	0.501412	-0.866805	0.744406	-0.8585	-0.736182	-0.576961	-0.723881		ATF7IP		ATF7IP.S	ATF7IP	ATF7IP;ATF7IP2	ACTIVATING TRANSCRIPTION FACTOR 7-INTERACTING PROTEIN 1-LIKE		MCAF1_CHICK	HYPOTHETICAL PROTEIN;PUTATIVE ACTIVATING TRANSCRIPTION FACTOR 7-INTERACTING PROTEIN 1 ISOFORM X1	MCAF1_CHICK	UNCHARACTERIZED LOC577080, TRANSCRIPT VARIANT X3; UNCHARACTERIZED LOC577080, TRANSCRIPT VARIANT X1; UNCHARACTERIZED LOC577080, TRANSCRIPT VARIANT X2
369	PORTHOMCL369[AjBfCgCiDrGgLvMmOjOlPsSpXl|(51 genes, 13 taxa)]:	-0.480385	-0.930242	-0.614725	0.188946	0.0446569	0.720735	-0.909403	-0.0884615	-0.865706	-0.686481	-0.618995	-0.723727	RRM2;RRM2B	RRM2;RRM2B	RRM2;RRM2B	RRM2.2.L;RRM2.2.S;RRM2.1.L;RRM2B.S;RRM2;RRM2B	RIBONUCLEOSIDE-DIPHOSPHATE REDUCTASE SUBUNIT M2-LIKE;RIBONUCLEOSIDE-DIPHOSPHATE REDUCTASE SUBUNIT M2;RRM2B;RRM2 (1 OF MANY)	RRM2;RRM2B	RIBONUCLEOSIDE-DIPHOSPHATE REDUCTASE SUBUNIT M2, TRANSCRIPT VARIANT X1; RIBONUCLEOSIDE-DIPHOSPHATE REDUCTASE SUBUNIT M2, TRANSCRIPT VARIANT X2;RRM2	RRM2B;RNRS;RRM2	RIR2_SPISO;RIR2_CAEEL;RIR2B_PONAB;RIR2B_HUMAN;RIR2_YLDV;RIR2_MESAU;RRM2B	RIBONUCLEOSIDE-DIPHOSPHATE REDUCTASE SUBUNIT M2	RIR2_MOUSE;RIR2_DANRE;RRM2	RIBONUCLEOSIDE-DIPHOSPHATE REDUCTASE SUBUNIT M2;RIBONUCLEOSIDE-DIPHOSPHATE REDUCTASE SUBUNIT M2 B;RIBONUCLEOSIDE-DIPHOSPHATE REDUCTASE SUBUNIT M2-LIKE;RRM2
4113	PORTHOMCL4113[AjBfCgCiDrGgLvMmOjOlPsSpXl|(16 genes, 13 taxa)]:	-0.452912	-0.532703	-0.487637	-0.341397	-0.100931	-0.331382	-0.801208	-0.302797	-0.658882	-0.793829	-0.718382	-0.723698	GET4	GET4	GET4	GET4.S;GET4	GET4	GET4	GOLGI TO ER TRAFFIC PROTEIN 4 HOMOLOG	GET4	GET4_ORYLA;GET4	GOLGI TO ER TRAFFIC PROTEIN 4-LIKE;PUTATIVE GOLGI TO ER TRAFFIC PROTEIN 4-LIKE B;GET4	GET4_HUMAN;GET4	GOLGI TO ER TRAFFIC PROTEIN 4 HOMOLOG B, TRANSCRIPT VARIANT X3; GOLGI TO ER TRAFFIC PROTEIN 4 HOMOLOG B, TRANSCRIPT VARIANT X2; GOLGI TO ER TRAFFIC PROTEIN 4 HOMOLOG B, TRANSCRIPT VARIANT X1;GET4
6474	PORTHOMCL6474[AjBfCgDrGgLvMmOjOlPsSpXl|(13 genes, 12 taxa)]:	0.393187	0.202945	-0.141154	-0.127157	0.474044	0.313794	0	-0.468036	-0.774765	-0.757399	-0.638725	-0.72363	AKTIP	AKTIP	AKTIP	AKTIP.S;AKTIP.L;AKTIP	AKTIP	AKTIP		AKTIP	AKTIP_PONAB;AKTIP	PUTATIVE AKT-INTERACTING PROTEIN ISOFORM X2;AKTIP	AKTIP_RAT;AKTIP	AKT-INTERACTING PROTEIN, TRANSCRIPT VARIANT X4; AKT-INTERACTING PROTEIN, TRANSCRIPT VARIANT X2; AKT-INTERACTING PROTEIN, TRANSCRIPT VARIANT X1; AKT-INTERACTING PROTEIN, TRANSCRIPT VARIANT X3;AKTIP
3868	PORTHOMCL3868[AjBfCgCiDrGgLvMmOjOlPsSpXl|(16 genes, 13 taxa)]:	-0.131484	-0.536615	-0.71522	0.0382108	-0.518113	0.723676	-0.171351	-0.678462	-0.872324	-0.762353	-0.536029	-0.723569		SRRT	SRRT	SRRT.L;SRRT.S;SRRT	SRRT	SRRT	SERRATE RNA EFFECTOR MOLECULE HOMOLOG, TRANSCRIPT VARIANT X2; SERRATE RNA EFFECTOR MOLECULE HOMOLOG, TRANSCRIPT VARIANT X1;SRRT	SRRT	SRRTA_XENLA;SRRT_CRIGR;SRRT	PUTATIVE SERRATE RNA EFFECTOR MOLECULE-LIKE ISOFORM X6;SERRATE RNA EFFECTOR MOLECULE-LIKE PROTEIN	SRRT_AEDAE	SERRATE RNA EFFECTOR MOLECULE HOMOLOG, TRANSCRIPT VARIANT X5; SERRATE RNA EFFECTOR MOLECULE HOMOLOG, TRANSCRIPT VARIANT X1; SERRATE RNA EFFECTOR MOLECULE HOMOLOG, TRANSCRIPT VARIANT X3; SERRATE RNA EFFECTOR MOLECULE HOMOLOG, TRANSCRIPT VARIANT X4; SERRATE RNA EFFECTOR MOLECULE HOMOLOG, TRANSCRIPT VARIANT X2; SERRATE RNA EFFECTOR MOLECULE HOMOLOG, TRANSCRIPT VARIANT X6
1105	PORTHOMCL1105[AjBfCgCiDrGgLvMmOjOlPsSpXl|(28 genes, 13 taxa)]:	-0.534451	-0.504352	-0.52978	-0.433578	0.118873	0.634324	-0.715026	-0.350839	-0.878529	-0.680949	-0.611152	-0.723544	ASNSD1;SLC35D1	ASNSD1;SLC35D1	ASNSD1;SLC35D1;GM28551	ASNSD1.L;LOC108715520;ASNSD1	ASNSD1;SLC35D1A	ASNSD1;SLC35D1A;SLC35D1	ASPARAGINE SYNTHETASE DOMAIN-CONTAINING PROTEIN 1-LIKE;UDP-N-ACETYLGLUCOSAMINE/UDP-GLUCOSE/GDP-MANNOSE TRANSPORTER;SOLUTE CARRIER FAMILY 35 MEMBER D3;ASNSD1	ASNSD1;SLC35D1	S35D2_PONAB;ASND1_BOVIN	HYPOTHETICAL PROTEIN;PUTATIVE UDP-N-ACETYLGLUCOSAMINE/UDP-GLUCOSE/GDP-MANNOSE TRANSPORTER-LIKE;ASNSD1	ASND1_MACFA;S35D2_PONAB	ASPARAGINE SYNTHETASE DOMAIN-CONTAINING PROTEIN 1-LIKE;UDP-N-ACETYLGLUCOSAMINE/UDP-GLUCOSE/GDP-MANNOSE TRANSPORTER, TRANSCRIPT VARIANT X2; UDP-N-ACETYLGLUCOSAMINE/UDP-GLUCOSE/GDP-MANNOSE TRANSPORTER, TRANSCRIPT VARIANT X1;SLC35D1
9758	PORTHOMCL9758[CiDrLvMmOjOlPsSpXl|(9 genes, 9 taxa)]:	0	-0.838769	-0.376099	0	-0.431583	0.428294	-0.754193	0	-0.856265	-0.575557	-0.738687	-0.723503		SWI5	SWI5	LOC108700511;SWI5	SWI5	SWI5	DNA REPAIR PROTEIN SWI5 HOMOLOG;SWI5		SWI5_SALSA			DNA REPAIR PROTEIN SWI5 HOMOLOG
1660	PORTHOMCL1660[BfCgCiDrGgLvMmOjOlPsSpXl|(23 genes, 12 taxa)]:	-0.354505	-0.557495	-0.860659	0.347304	0.632549	0.455029	-0.817857	-0.503318	-0.898559	-0.724025	-0.547794	-0.723459	USP4;USP15	USP15	USP4;USP15;USP11	USP15.S;USP4.L;USP4.S;USP15.L;USP15;USP4	USP15	USP4;USP11;CABZ01074304.1;USP15	UBIQUITIN CARBOXYL-TERMINAL HYDROLASE 15;USP11	USP4	UBP15_XENTR;UBP15_HUMAN		UBP4_RAT;USP4	UBIQUITIN CARBOXYL-TERMINAL HYDROLASE 4, TRANSCRIPT VARIANT X2; UBIQUITIN CARBOXYL-TERMINAL HYDROLASE 4, TRANSCRIPT VARIANT X1;USP4
10848	PORTHOMCL10848[AjBfCgCiLvOjSp|(7 genes, 7 taxa)]:	0	0	0	0	0	0	-0.908325	0.574685	-0.896735	-0.710877	-0.5625	-0.723371							AMINO ACID TRANSPORTER ANTL1, TRANSCRIPT VARIANT X1; AMINO ACID TRANSPORTER ANTL1, TRANSCRIPT VARIANT X2		ANTL2_ARATH	PUTATIVE PROTON-COUPLED AMINO ACID TRANSPORTER 3 ISOFORM X2	ANTL1_ARATH	PROTON-COUPLED AMINO ACID TRANSPORTER 1
2530	PORTHOMCL2530[AjBfCgCiDrGgLvMmOjOlPsSpXl|(19 genes, 13 taxa)]:	0.415879	0.528088	0.11489	0.403211	-0.231863	-0.208882	-0.863078	-0.217273	-0.488147	-0.910568	-0.770833	-0.723183	CANT1	CANT1	CANT1	CANT1.L;CANT1	CANT1A;CANT1B;CANT1	CANT1A;CANT1B	SOLUBLE CALCIUM-ACTIVATED NUCLEOTIDASE 1, TRANSCRIPT VARIANT X3; SOLUBLE CALCIUM-ACTIVATED NUCLEOTIDASE 1, TRANSCRIPT VARIANT X1; SOLUBLE CALCIUM-ACTIVATED NUCLEOTIDASE 1, TRANSCRIPT VARIANT X2;CANT1	CANT1	CANT1_RAT	SOLUBLE CALCIUM-ACTIVATED NUCLEOTIDASE 1;PUTATIVE SOLUBLE CALCIUM-ACTIVATED NUCLEOTIDASE 1	CANT1_MOUSE;CANT1_RAT;CANT1	SOLUBLE CALCIUM-ACTIVATED NUCLEOTIDASE 1;CANT1A
5809	PORTHOMCL5809[AjBfCgCiDrGgLvMmOjOlPsSpXl|(14 genes, 13 taxa)]:	-0.671758	-0.883912	-0.62522	0.214706	0.128775	0.124618	-0.887545	0.000503555	-0.866471	-0.775686	-0.526593	-0.722917	VRK1	VRK1	VRK1	VRK1.L;VRK1.S;VRK1	VRK1	VRK1	SERINE/THREONINE-PROTEIN KINASE VRK1	VRK1	VRK1_MOUSE	HYPOTHETICAL PROTEIN	VRK1_DANRE	SERINE/THREONINE-PROTEIN KINASE VRK1-LIKE;VRK1
6128	PORTHOMCL6128[AjBfDrGgLvMmOjOlPsSpXl|(13 genes, 11 taxa)]:	-0.423681	-0.564484	-0.310879	-0.491887	0.185123	-0.596033	0	0.168392	-0.865176	-0.66644	-0.635784	-0.722467	TFB2M	TFB2M	GM1818;TFB2M	TFB2M.L;TFB2M	TFB2M	TFB2M		TFB2M	TFB2M_BOVIN	MITOCHONDRIAL TRANSCRIPTION FACTOR 2M	TFB2M_HUMAN	DIMETHYLADENOSINE TRANSFERASE 2, MITOCHONDRIAL
3111	PORTHOMCL3111[AjBfCgCiDrGgLvMmOjOlPsSpXl|(18 genes, 13 taxa)]:	0.315604	-0.807736	-0.676978	-0.114093	0.089951	0.00332353	-0.829948	0.404406	-0.903265	-0.804499	-0.459314	-0.722359	BAZ1A	BAZ1A	BAZ1A	BAZ1A.L;BAZ1A.S;BAZ1A	BAZ1A	BAZ1A;IM:6907928	BROMODOMAIN ADJACENT TO ZINC FINGER DOMAIN PROTEIN 1A, TRANSCRIPT VARIANT X1; BROMODOMAIN ADJACENT TO ZINC FINGER DOMAIN PROTEIN 1A, TRANSCRIPT VARIANT X2; BROMODOMAIN ADJACENT TO ZINC FINGER DOMAIN PROTEIN 1A, TRANSCRIPT VARIANT X3;LOC100186225		BAZ1A_MOUSE	PUTATIVE BROMODOMAIN ADJACENT TO ZINC FINGER DOMAIN PROTEIN 1A ISOFORM X3;HYPOTHETICAL PROTEIN	BAZ1A_HUMAN	BROMODOMAIN ADJACENT TO ZINC FINGER DOMAIN PROTEIN 1A, TRANSCRIPT VARIANT X3; BROMODOMAIN ADJACENT TO ZINC FINGER DOMAIN PROTEIN 1A, TRANSCRIPT VARIANT X1; BROMODOMAIN ADJACENT TO ZINC FINGER DOMAIN PROTEIN 1A, TRANSCRIPT VARIANT X2
3589	PORTHOMCL3589[BfCgCiDrGgLvMmOjOlPsSpXl|(17 genes, 12 taxa)]:	-0.563187	-0.653011	0.142308	0.294583	-0.0715686	-0.405235	-0.803182	-0.70595	-0.7425	-0.771084	-0.652941	-0.722175	EXT2	EXT2	EXT2	EXT2.S;EXT2.L;EXT2	EXT2	EXT2	EXOSTOSIN-2-LIKE;PROBABLE GLYCOSYLTRANSFERASE AT5G11130;EXT2		EXT2_MOUSE		EXT2_BOVIN;EXT2_MOUSE;EXT2	EXOSTOSIN-2;EXT2
5527	PORTHOMCL5527[AjBfCgCiDrGgLvMmOjOlPsSpXl|(14 genes, 13 taxa)]:	-0.421044	-0.645758	-0.541429	0.400637	0.0915196	0.0478235	-0.912545	-0.766728	-0.800706	-0.789536	-0.57402	-0.72142	POLR2F	POLR2F	POLR2F	LOC108714542;POLR2F.S;POLR2F	POLR2F	POLR2F	DNA-DIRECTED RNA POLYMERASES I, II, AND III SUBUNIT RPABC2-LIKE;POLR2F	POLR2F	RPAB2_RAT	PUTATIVE DNA-DIRECTED RNA POLYMERASES I, II, AND III SUBUNIT RPABC2;POLR2F	RPAB2_RAT;POLR2F	DNA-DIRECTED RNA POLYMERASES I, II, AND III SUBUNIT RPABC2-LIKE
1914	PORTHOMCL1914[AjBfCgCiDrGgLvMmOjOlPsSpXl|(22 genes, 13 taxa)]:	-0.471264	-0.565626	-0.627473	0.0734559	-0.508873	0.493059	-0.675247	-0.110839	-0.769912	-0.731992	-0.662255	-0.721386	SF3A1	C6L2K5_PELSI;SF3A1	SF3A1	SF3A1.L;LOC108707057;SF3A1	SF3A1	SF3A1	SPLICING FACTOR 3A SUBUNIT 1-LIKE, TRANSCRIPT VARIANT X4; SPLICING FACTOR 3A SUBUNIT 1-LIKE, TRANSCRIPT VARIANT X3; SPLICING FACTOR 3A SUBUNIT 1-LIKE, TRANSCRIPT VARIANT X1; SPLICING FACTOR 3A SUBUNIT 1-LIKE, TRANSCRIPT VARIANT X2;SF3A1	SF3A1	SF3A1_BOVIN;SF3A1	PUTATIVE SPLICING FACTOR 3A SUBUNIT 1-LIKE;PUTATIVE SPLICING FACTOR 3A SUBUNIT 1;SPLICING FACTOR 3A SUBUNIT 1;SF3A1	SF3A1_HUMAN;SF3A1_MOUSE	SPLICING FACTOR 3A SUBUNIT 1;SPLICING FACTOR 3A SUBUNIT 1-LIKE
2260	PORTHOMCL2260[AjBfCgCiDrGgLvMmOjOlPsSpXl|(20 genes, 13 taxa)]:	0.394835	0.626725	-0.343407	-0.407549	0.27375	0.554618	-0.716247	-0.90049	-0.712618	-0.760743	-0.690564	-0.721308	SFXN3;SFXN1	SFXN3	SFXN1;SFXN3	SFXN1.L;SFXN3.L;SFXN1	SFXN1;SFXN3	SFXN1;SFXN3	SIDEROFLEXIN-1-LIKE;SFXN3	SFXN1	SFXN1_RAT;SFXN3	PUTATIVE SIDEROFLEXIN-1;SFXN1	SFXN1_MOUSE	SIDEROFLEXIN-1, TRANSCRIPT VARIANT X1; SIDEROFLEXIN-1, TRANSCRIPT VARIANT X2;SIDEROFLEXIN-1;SFXN1
2294	PORTHOMCL2294[AjBfCgCiDrGgLvMmOjOlPsSpXl|(20 genes, 13 taxa)]:	-0.53989	-0.726462	-0.536703	-0.812328	-0.811152	0.218618	-0.95613	-0.446923	-0.779618	-0.642085	-0.742034	-0.721246	NMT1;NMT2	NMT2	NMT1;NMT2	NMT2.L;NMT1.L;NMT2	NMT2;NMT1A;NMT1B	NMT2;NMT1A;NMT1B	GLYCYLPEPTIDE N-TETRADECANOYLTRANSFERASE 1	NMT2	NMT2_HUMAN	PUTATIVE GLYCYLPEPTIDE N-TETRADECANOYLTRANSFERASE 1 ISOFORM X2	NMT2_HUMAN;NMT2	GLYCYLPEPTIDE N-TETRADECANOYLTRANSFERASE 2
2826	PORTHOMCL2826[AjBfCgCiDrGgLvMmOjOlPsSpXl|(18 genes, 13 taxa)]:	-0.466813	-0.892571	-0.550549	-0.685147	-0.0645833	-0.610647	-0.880403	-0.406643	-0.703088	-0.809639	-0.650858	-0.721195	CDK1	CDK1	CDK1	CDK1.S;CDK1.L;CDK1	CDK1	CDK1	CYCLIN-DEPENDENT KINASE 1-LIKE;CDK1	CDK1	CDK1_CARAU;CDK1	PUTATIVE CYCLIN-DEPENDENT KINASE 8;CELL DIVISION CYCLE 2;CDK1	CDK1_RAT	CYCLIN-DEPENDENT KINASE 1;CDK1
8769	PORTHOMCL8769[CiDrGgLvMmOjOlPsSpXl|(10 genes, 10 taxa)]:	0.67956	-0.464615	-0.336923	-0.330001	-0.186544	-0.321059	-0.0659027	0	-0.8165	-0.72227	-0.62402	-0.72093	LARGE1	LARGE;LARGE1	LARGE1	LARGE.L;LARGE1	LARGE2	GYLTL1B	GLYCOSYLTRANSFERASE-LIKE PROTEIN LARGE1		LARG2_DANRE;LARGE2		LARG2_DANRE;LARGE1	GLYCOSYLTRANSFERASE-LIKE PROTEIN LARGE1;LARGE1
1674	PORTHOMCL1674[AjBfCgCiLvOjSp|(23 genes, 7 taxa)]:	0	0	0	0	0	0	0.607596	0.0941259	-0.793559	-0.741495	-0.627681	-0.720911							AMMONIUM TRANSPORTER 2, TRANSCRIPT VARIANT X1; AMMONIUM TRANSPORTER 2; AMMONIUM TRANSPORTER 2, TRANSCRIPT VARIANT X2;AMMONIUM TRANSPORTER 1; AMMONIUM TRANSPORTER 1, TRANSCRIPT VARIANT X1		AMT1_CAEEL;AMT	HYPOTHETICAL PROTEIN;AMMONIUM TRANSPORTER-LIKE PROTEIN;PUTATIVE AMMONIUM TRANSPORTER 1 ISOFORM X2;PUTATIVE AMMONIUM TRANSPORTER 1 ISOFORM X1	AMT1_CAEEL	PUTATIVE AMMONIUM TRANSPORTER 1, TRANSCRIPT VARIANT X2; PUTATIVE AMMONIUM TRANSPORTER 1, TRANSCRIPT VARIANT X1
12238	PORTHOMCL12238[AjBfCgLvOjSp|(6 genes, 6 taxa)]:	0	0	0	0	0	0	0	0.453427	-0.810853	-0.681631	-0.66924	-0.720575										PUTATIVE DYNACTIN SUBUNIT 1		DYNACTIN SUBUNIT 1
5270	PORTHOMCL5270[AjBfCgCiDrLvMmOjOlSpXl|(14 genes, 11 taxa)]:	0	0	-0.552582	-0.361225	-0.23375	-0.348529	-0.857039	-0.292587	-0.619853	-0.804954	-0.735662	-0.720156			WDR46	WDR46.L;WDR46.S;WDR46	WDR46	WDR46	WD REPEAT-CONTAINING PROTEIN 46-LIKE, TRANSCRIPT VARIANT X2; WD REPEAT-CONTAINING PROTEIN 46-LIKE, TRANSCRIPT VARIANT X1;WDR46	WDR46	WDR46_HUMAN;WDR46	PUTATIVE WD REPEAT-CONTAINING PROTEIN 46 ISOFORM X2;PUTATIVE WD REPEAT-CONTAINING PROTEIN 46 ISOFORM X1;WDR46	WDR46_HUMAN	WD REPEAT-CONTAINING PROTEIN 46, TRANSCRIPT VARIANT X1; WD REPEAT-CONTAINING PROTEIN 46, TRANSCRIPT VARIANT X2; WD REPEAT-CONTAINING PROTEIN 46, TRANSCRIPT VARIANT X3;WD REPEAT-CONTAINING PROTEIN 46-LIKE;WDR46
8119	PORTHOMCL8119[AjLvMmOjOlPsSpXl|(11 genes, 8 taxa)]:	0	0.332747	0.799447	0.289618	-0.24555	0	0	0	-0.844765	-0.557977	-0.757572	-0.720105		CPS1	CPS1	CPS1.L;CPS1	CPS1				CPSM_HUMAN;CPS1	PUTATIVE CAD PROTEIN;CAD	CPSM_HUMAN;CPS1	CARBAMOYL-PHOSPHATE SYNTHASE [AMMONIA], MITOCHONDRIAL;CPS1;CARA
6677	PORTHOMCL6677[AjBfCgCiDrGgLvOjOlPsSpXl|(13 genes, 12 taxa)]:	-0.441264	-0.566066	0	0.282451	-0.130319	-0.405029	-0.903286	0.192238	-0.847059	-0.524272	-0.78799	-0.719774	CHTF8;DERPC	CHTF8;DERPC		CHTF8.L	CHTF8;DERPC	CHTF8;DERPC	CHROMOSOME TRANSMISSION FIDELITY PROTEIN 8 HOMOLOG;DERPC		CTF8_MOUSE	PUTATIVE CHROMOSOME TRANSMISSION FIDELITY PROTEIN 8-LIKE;DERPC	CTF8_BOVIN	CHROMOSOME TRANSMISSION FIDELITY PROTEIN 8 HOMOLOG
4253	PORTHOMCL4253[AjBfCgCiDrGgLvMmOjOlPsSpXl|(16 genes, 13 taxa)]:	0.0443407	-0.192352	0.161154	0.286078	0.12598	0.119647	0.341156	-0.0925175	-0.801441	-0.822312	-0.535294	-0.719682	TRIP11	TRIP11	TRIP11	TRIP11.L;TRIP11	TRIP11	TRIP11	THYROID RECEPTOR-INTERACTING PROTEIN 11		TRIPB_HUMAN	PUTATIVE THYROID RECEPTOR-INTERACTING PROTEIN 11	TRIPB_HUMAN	THYROID RECEPTOR-INTERACTING PROTEIN 11
3345	PORTHOMCL3345[AjBfCgCiDrGgLvMmOjOlPsSpXl|(17 genes, 13 taxa)]:	-0.386923	-0.541363	-0.883901	-0.748039	0.169853	-0.0722647	-0.894688	0	-0.868382	-0.728277	-0.561642	-0.719434	DPP9	DPP9;DPP8	DPP8;DPP9	DPP8.L;DPP8.S;DPP9.L;DPP8;DPP9	DPP9	DPP9	DIPEPTIDYL PEPTIDASE 8-LIKE, TRANSCRIPT VARIANT X1; DIPEPTIDYL PEPTIDASE 8-LIKE, TRANSCRIPT VARIANT X2;DPP8	DPP9	DPP9_HUMAN	PUTATIVE DIPEPTIDYL PEPTIDASE 9;DPP9	DPP9_HUMAN	DIPEPTIDYL PEPTIDASE 9;DPP9
4915	PORTHOMCL4915[AjBfCgDrGgLvMmOjOlPsSpXl|(15 genes, 12 taxa)]:	-0.619231	-0.794154	-0.553736	-0.0183333	-0.134706	0.3445	0	-0.0287413	-0.795765	-0.74805	-0.612132	-0.718649	CPSF2	CPSF2	CPSF2	CPSF2.S;CPSF2.L;CPSF2	CPSF2	CPSF2		CPSF2	CPSF2_BOVIN	HYPOTHETICAL PROTEIN	CPSF2_MOUSE;CPSF2	CLEAVAGE AND POLYADENYLATION SPECIFICITY FACTOR SUBUNIT 2;CPSF2
4965	PORTHOMCL4965[AjBfDrGgLvMmOjOlPsSpXl|(15 genes, 11 taxa)]:	-0.698791	-0.762022	-0.46511	-0.0032598	0.0930882	-0.503059	0	0.157758	-0.894882	-0.55226	-0.708645	-0.718596	HEATR3	HEATR3	HEATR3	LOC108713990;HEATR3	HEATR3	HEATR3			HEAT3_HUMAN	PUTATIVE HEAT REPEAT-CONTAINING PROTEIN 3	HEAT3_HUMAN;HEATR3	HEAT REPEAT-CONTAINING PROTEIN 3;HEAT REPEAT-CONTAINING PROTEIN 3-LIKE
6705	PORTHOMCL6705[AjBfCgCiDrGgLvMmOjOlPsSpXl|(13 genes, 13 taxa)]:	-0.130989	0.284308	-0.591484	-0.0326716	0.123897	-0.464559	-0.678104	0.424618	-0.884176	-0.817214	-0.454044	-0.718478	DPH2	DPH2	DPH2	DPH2.L;DPH2	DPH2	DPH2	DIPHTHAMIDE BIOSYNTHESIS PROTEIN 2	DPH2	DPH2_DANRE;DPH2	PUTATIVE DIPHTHAMIDE BIOSYNTHESIS PROTEIN 2-LIKE;DPH2	DPH2_DANRE	DIPHTHAMIDE BIOSYNTHESIS PROTEIN 2, TRANSCRIPT VARIANT X2; DIPHTHAMIDE BIOSYNTHESIS PROTEIN 2, TRANSCRIPT VARIANT X1
10935	PORTHOMCL10935[AjBfCgCiLvOjSp|(7 genes, 7 taxa)]:	0	0	0	0	0	0	-0.560675	0.0963636	-0.853794	-0.631042	-0.670343	-0.718393							CENTROSOMAL PROTEIN OF 72 KDA-LIKE		CEP72_HUMAN	PUTATIVE CENTROSOMAL PROTEIN	CEP72_HUMAN	CENTROSOMAL PROTEIN OF 72 KDA
2150	PORTHOMCL2150[BfCgCiDrGgLvMmOjOlPsSpXl|(21 genes, 12 taxa)]:	0.0410989	-0.546769	-0.712802	-0.200613	-0.25277	0.142735	-0.808065	-0.277312	-0.864265	-0.722456	-0.566054	-0.717592	CREBBP;EP300	CREBBP;EP300	CREBBP	CREBBP.S;LOC108715729;EP300	CREBBPB;CREBBPA	CREBBPB;CREBBPA	HISTONE ACETYLTRANSFERASE P300		CBP_HUMAN;LOC106601244		CBP_HUMAN;LOC106607167	CREB-BINDING PROTEIN, TRANSCRIPT VARIANT X12; CREB-BINDING PROTEIN, TRANSCRIPT VARIANT X11; CREB-BINDING PROTEIN, TRANSCRIPT VARIANT X10; CREB-BINDING PROTEIN, TRANSCRIPT VARIANT X2; CREB-BINDING PROTEIN, TRANSCRIPT VARIANT X14; CREB-BINDING PROTEIN, TRANSCRIPT VARIANT X13; CREB-BINDING PROTEIN, TRANSCRIPT VARIANT X4; CREB-BINDING PROTEIN, TRANSCRIPT VARIANT X9; CREB-BINDING PROTEIN, TRANSCRIPT V…
3249	PORTHOMCL3249[AjBfCgDrGgLvMmOjOlPsSpXl|(17 genes, 12 taxa)]:	-0.390165	-0.861407	-0.493791	0.348505	-0.371863	-0.0569118	0	0.276923	-0.646735	-0.850878	-0.652696	-0.71677	CRNKL1	CRNKL1	CRNKL1	CRNKL1.S;CRNKL1.L;CRNKL1	CRNKL1	XAB2;CRNKL1			CRNL1_RAT;CRNKL1	PUTATIVE CROOKED NECK-LIKE PROTEIN 1-LIKE	CRNL1_HUMAN	CROOKED NECK-LIKE PROTEIN 1, TRANSCRIPT VARIANT X3; CROOKED NECK-LIKE PROTEIN 1, TRANSCRIPT VARIANT X2; CROOKED NECK-LIKE PROTEIN 1, TRANSCRIPT VARIANT X1;CROOKED NECK-LIKE PROTEIN 1;CRNKL1
5139	PORTHOMCL5139[AjBfCiDrGgLvMmOjOlPsSpXl|(14 genes, 12 taxa)]:	-0.00527473	-0.803648	0.811593	-0.155637	0.219706	-0.261152	-0.742065	0.32	-0.819471	-0.74902	-0.58174	-0.716743	SLC25A16	SLC25A16	SLC25A16	SLC25A16.L;SLC25A16.S;SLC25A16	SLC25A16	SLC25A16	GRAVES DISEASE CARRIER PROTEIN HOMOLOG;SLC25A16	SLC25A16	CCDC6_HUMAN	PUTATIVE GRAVES DISEASE CARRIER PROTEIN-LIKE ISOFORM X1;SLC25A16	GDC_MOUSE	GRAVES DISEASE CARRIER PROTEIN HOMOLOG, TRANSCRIPT VARIANT X2; GRAVES DISEASE CARRIER PROTEIN HOMOLOG, TRANSCRIPT VARIANT X1;GRAVES DISEASE CARRIER PROTEIN-LIKE;SLC25A16
14952	PORTHOMCL14952[AjLvOjSp|(4 genes, 4 taxa)]:	0	0	0	0	0	0	0	0	-0.845706	-0.746584	-0.557353	-0.716548									BCA1_CAEBR	BETA CARBONIC ANHYDRASE 1	BCA1_CAEBR	BETA CARBONIC ANHYDRASE 1, TRANSCRIPT VARIANT X1; BETA CARBONIC ANHYDRASE 1, TRANSCRIPT VARIANT X2
5637	PORTHOMCL5637[AjBfCgCiDrGgLvMmOjOlSpXl|(14 genes, 12 taxa)]:	-0.39478	0	-0.521868	0.292034	-0.105098	0.463059	-0.617416	-0.878438	-0.752412	-0.742807	-0.653554	-0.716258	EPB41L5;EPB41L4B		EPB41L5	EPB41L5.S;LOC108720029;EPB41L5;EPB41L4B	EPB41L5	EPB41L5	BAND 4.1-LIKE PROTEIN 5, TRANSCRIPT VARIANT X1; BAND 4.1-LIKE PROTEIN 5, TRANSCRIPT VARIANT X2;EPB41L5		E41L5_MOUSE;EPB41L5	PUTATIVE BAND 4.1-LIKE PROTEIN 5 ISOFORM X3	E41L5_HUMAN	BAND 4.1-LIKE PROTEIN 5, TRANSCRIPT VARIANT X1; BAND 4.1-LIKE PROTEIN 5, TRANSCRIPT VARIANT X6; BAND 4.1-LIKE PROTEIN 5, TRANSCRIPT VARIANT X3; BAND 4.1-LIKE PROTEIN 5, TRANSCRIPT VARIANT X5; BAND 4.1-LIKE PROTEIN 5, TRANSCRIPT VARIANT X2; BAND 4.1-LIKE PROTEIN 5, TRANSCRIPT VARIANT X4;EPB41L5
2775	PORTHOMCL2775[AjBfCgCiDrGgLvMmOjOlPsSpXl|(18 genes, 13 taxa)]:	-0.518022	-0.600527	-0.560055	-0.194902	-0.363676	-0.0262059	-0.677506	-0.334196	-0.811235	-0.49257	-0.843873	-0.715893	EXOSC2	EXOSC2	EXOSC2	EXOSC2.L;EXOSC2	EXOSC2	EXOSC2	EXOSOME COMPLEX COMPONENT RRP4;EXOSC2	EXOSC2	EXOS2_BOVIN;EXOSC2	PUTATIVE EXOSOME COMPLEX COMPONENT RRP4;PUTATIVE EXOSOME COMPLEX COMPONENT RRP4-LIKE;EXOSC2	EXOS2_BOVIN;EXOSC2	EXOSOME COMPLEX COMPONENT RRP4;EXOSC2
2183	PORTHOMCL2183[AjBfCgCiDrGgLvMmOjOlPsSpXl|(20 genes, 13 taxa)]:	0.0346703	-0.627429	-0.335495	0.288676	0.683725	0.717676	-0.840481	-0.0544755	-0.835088	-0.677152	-0.634681	-0.71564	WDR26	WDR26	WDR26	WDR26.L;WDR26.S;WDR26	WD REPEAT-CONTAINING PROTEIN 26;WDR26B;WDR26	WDR26B;WDR26	WD REPEAT-CONTAINING PROTEIN 26;WDR26	WDR26	WDR26_XENTR;WDR26	PUTATIVE WD REPEAT-CONTAINING PROTEIN 26;PUTATIVE WD REPEAT-CONTAINING PROTEIN 26-LIKE;WDR26	WDR26_XENTR	WD REPEAT-CONTAINING PROTEIN 26;WDR26
4805	PORTHOMCL4805[AjBfCgCiDrGgLvMmOjOlPsSpXl|(15 genes, 13 taxa)]:	-0.177143	-0.447121	0.273901	0.153529	0.451201	0.474059	-0.592338	-0.402937	-0.781618	-0.834241	-0.530637	-0.715499	TM9SF3	TM9SF3	TM9SF1	TM9SF1.S;TM9SF1	TM9SF1	TM9SF1	TRANSMEMBRANE 9 SUPERFAMILY MEMBER 1;TM9SF1	TM9SF1	TM9S1_MOUSE;TM9SF1	PUTATIVE TRANSMEMBRANE 9 SUPERFAMILY MEMBER 1-LIKE;TM9SF1	TM9S3_HUMAN;TM9S1_RAT;TM9SF3	TRANSMEMBRANE 9 SUPERFAMILY MEMBER 1;TM9SF1
5808	PORTHOMCL5808[AjBfCgCiDrGgLvMmOjOlPsSpXl|(14 genes, 13 taxa)]:	-0.454835	-0.686725	-0.525	0.384191	0.0705147	0.0758529	-0.810156	-0.66909	-0.707265	-0.646254	-0.792892	-0.71547	AATF	AATF	AATF	LOC108707484;AATF.S;AATF	AATF	AATF	PROTEIN AATF	AATF	AATF_RAT	HYPOTHETICAL PROTEIN;AATF	AATF_MOUSE	PROTEIN AATF;AATF
1909	PORTHOMCL1909[AjBfCgCiDrGgLvMmOjOlPsSpXl|(22 genes, 13 taxa)]:	0.00021978	-0.681714	-0.957418	0.187304	0.0105637	0.486618	-0.897649	-0.654778	-0.872088	-0.91257	-0.36152	-0.715393	MEX3B	MEX3B;MEX3C	MEX3B;MEX3C	MEX3B.L;MEX3B.S;MEX3C.L;MEX3C.S;MEX3B	RNA-BINDING PROTEIN MEX3B;MEX3D;MEX3C	MEX3B;MEX3A;CABZ01080015.1;MEX3D	RNA-BINDING PROTEIN MEX3B	MEX3B	MEX3B_XENLA;MEX3D	PUTATIVE RNA-BINDING PROTEIN MEX3B-LIKE;MEX3D	MEX3B_XENLA	RNA-BINDING PROTEIN MEX3B-LIKE
5697	PORTHOMCL5697[AjBfCgCiDrGgLvMmOjOlPsSpXl|(14 genes, 13 taxa)]:	0.0985714	-0.875516	-0.761209	0.377132	-0.448137	0.713735	-0.895701	-0.441337	-0.843853	-0.742518	-0.558701	-0.715024	RCC2	RCC2	RCC2	RCC2.L	RCC2	RCC2	PROTEIN RCC2 HOMOLOG		RCC2_MOUSE	HYPOTHETICAL PROTEIN	RCC2_XENLA	PROTEIN RCC2 HOMOLOG
2171	PORTHOMCL2171[AjBfCgCiDrGgLvMmOjOlPsSpXl|(20 genes, 13 taxa)]:	-0.70044	-0.893538	-0.508956	0.0925735	0.164779	0.330647	-0.783714	-0.744389	-0.606412	-0.838101	-0.70049	-0.715001	VPS26B;VPS26A	VPS26B;VPS26A	VPS26B;VPS26A	VPS26B.L;VPS26B.S;VPS26B	VPS26B;VPS26A	VPS26BL;VPS26A;VPS26B	VACUOLAR PROTEIN SORTING-ASSOCIATED PROTEIN 26B, TRANSCRIPT VARIANT X1; VACUOLAR PROTEIN SORTING-ASSOCIATED PROTEIN 26B, TRANSCRIPT VARIANT X2;VPS26A	VPS26B	V26BL_DANRE;VPS26B	PUTATIVE VACUOLAR PROTEIN SORTING-ASSOCIATED PROTEIN 26B-LIKE;VPS26B	V26BL_DANRE;VPS26B	VACUOLAR PROTEIN SORTING-ASSOCIATED PROTEIN 26B-LIKE;VPS26B
4214	PORTHOMCL4214[AjBfCgCiDrGgLvMmOjOlPsSpXl|(16 genes, 13 taxa)]:	0.101538	-0.601626	-0.560714	0.422328	-0.187672	0.0905588	-0.813455	-0.577692	-0.748529	-0.68774	-0.708211	-0.714827	ING3	ING3	ING3	ING3.L;LOC108713101;ING3	ING3	ING3	INHIBITOR OF GROWTH PROTEIN 3, TRANSCRIPT VARIANT X1; INHIBITOR OF GROWTH PROTEIN 3, TRANSCRIPT VARIANT X2;ING3		ING3_XENTR;ING3	PUTATIVE INHIBITOR OF GROWTH PROTEIN 3;PUTATIVE INHIBITOR OF GROWTH PROTEIN 3-LIKE;ING3	ING3_MOUSE;ING3	INHIBITOR OF GROWTH PROTEIN 3;ING3
1560	PORTHOMCL1560[AjBfCgCiDrGgLvMmOjOlPsSpXl|(24 genes, 13 taxa)]:	-0.597418	-0.552615	-0.592473	-0.10348	0.0997304	0.829824	-0.711208	0.149496	-0.893588	-0.650485	-0.59951	-0.714528	UBP1;TFCP2L1;TFCP2	UBP1;TFCP2;TFCP2L1	TFCP2;UBP1;TFCP2L1	LSF;TFCP2.L;TFCP2	TFCP2;UBP1	TFCP2;UBP1;TFCP2L1	TRANSCRIPTION FACTOR CP2-LIKE;UBP1		UBIP1_MOUSE	PUTATIVE TRANSCRIPTION FACTOR CP2	TFCP2_XENLA	TRANSCRIPTION FACTOR CP2
6912	PORTHOMCL6912[BfCgCiDrGgLvMmOjOlPsSpXl|(13 genes, 12 taxa)]:	-0.441703	-0.768659	-0.513956	-0.8175	-0.559436	-0.67847	-0.677351	0.335175	-0.636235	-0.669329	-0.837132	-0.714232	EIF2A	EIF2A	EIF2A	EIF2A.L;EIF2A.S;EIF2A	EIF3BB;EIF3B	EIF2A	EUKARYOTIC TRANSLATION INITIATION FACTOR 2A, TRANSCRIPT VARIANT X2; EUKARYOTIC TRANSLATION INITIATION FACTOR 2A, TRANSCRIPT VARIANT X1;EIF2A		EIF2A_XENLA		EIF2A_XENLA;EIF2A	EUKARYOTIC TRANSLATION INITIATION FACTOR 2A;EIF2A
774	PORTHOMCL774[AjBfCgCiDrGgLvMmOjOlPsSpXl|(33 genes, 13 taxa)]:	0.210165	-0.729451	-0.540824	0.196275	0.487623	0.272676	-0.877558	-0.844488	-0.741529	-0.875996	-0.524632	-0.714053	TNKS2	TNKS	TNKS2	TNKS.L;TNKS2.S;TNKS2	TNKSA;TNKSB	TNKSB;TNKSA;TNKS	TANKYRASE-1;TANKYRASE-2, TRANSCRIPT VARIANT X2; TANKYRASE-2, TRANSCRIPT VARIANT X1		TNKS1_HUMAN;SRO5_ARATH	PUTATIVE TANKYRASE-2;PUTATIVE TANKYRASE-1-LIKE;HYPOTHETICAL PROTEIN	AQR_HUMAN;TNKS1_HUMAN	TANKYRASE-2;UNCHARACTERIZED LOC581115, TRANSCRIPT VARIANT X1; UNCHARACTERIZED LOC581115, TRANSCRIPT VARIANT X3; UNCHARACTERIZED LOC581115, TRANSCRIPT VARIANT X2; UNCHARACTERIZED LOC581115, TRANSCRIPT VARIANT X4; UNCHARACTERIZED LOC581115, TRANSCRIPT VARIANT X9; UNCHARACTERIZED LOC581115, TRANSCRIPT VARIANT X6; UNCHARACTERIZED LOC581115, TRANSCRIPT VARIANT X5; UNCHARACTERIZED LOC581115, TRANSCRIPT…
3388	PORTHOMCL3388[AjBfCiDrGgLvMmOjOlPsSpXl|(17 genes, 12 taxa)]:	0.430879	0.442549	-0.365604	0.274926	0.119019	-0.401765	-0.585143	0.211229	-0.769529	-0.839174	-0.532721	-0.713808	KAZN	KAZN	KAZN	KAZN.L;KAZN	KAZN (1 OF MANY);KAZNB;KAZN	KAZNB;KAZNA;KAZN	KAZRIN, TRANSCRIPT VARIANT X3; KAZRIN, TRANSCRIPT VARIANT X2; KAZRIN, TRANSCRIPT VARIANT X1; KAZRIN, TRANSCRIPT VARIANT X5; KAZRIN, TRANSCRIPT VARIANT X4		KAZRN_RAT;KAZN	PUTATIVE KAZRIN ISOFORM X4;PUTATIVE KAZRIN ISOFORM X6;KAZN		KAZRIN, TRANSCRIPT VARIANT X4; KAZRIN, TRANSCRIPT VARIANT X3; KAZRIN, TRANSCRIPT VARIANT X2; KAZRIN, TRANSCRIPT VARIANT X1; KAZRIN, TRANSCRIPT VARIANT X5; KAZRIN, TRANSCRIPT VARIANT X6;KAZN
4733	PORTHOMCL4733[AjBfCgCiDrGgLvMmOjOlPsSpXl|(15 genes, 13 taxa)]:	-0.435495	-0.682901	-0.555275	-0.272574	-0.11098	0.581059	0.60139	0.119441	-0.740382	-0.583633	-0.816912	-0.713642	WDR75	WDR75	WDR75	WDR75.L	WDR75	WDR75	WD REPEAT-CONTAINING PROTEIN 75	WDR75	WDR75_HUMAN;WDR75	PUTATIVE WD REPEAT-CONTAINING PROTEIN 75-LIKE	WDR75_MOUSE	UNCHARACTERIZED LOC593812
3218	PORTHOMCL3218[AjBfCgCiDrGgLvMmOjOlPsSpXl|(17 genes, 13 taxa)]:	-0.59489	-0.91433	-0.497857	0.353848	-0.125343	0.23944	-0.848792	-0.548042	-0.875735	-0.553581	-0.71152	-0.713612	DNAAF5	HEATR2;DNAAF5	DNAAF5	DNAAF5.S;DNAAF5.L;DNAAF5	DNAAF5	DNAAF5	DYNEIN ASSEMBLY FACTOR 5, AXONEMAL;DNAAF5	DNAAF5	DAAF5_MOUSE;DNAAF5	PUTATIVE DYNEIN ASSEMBLY FACTOR 5, AXONEMAL;DNAAF5	DAAF5_HUMAN	DYNEIN ASSEMBLY FACTOR 5, AXONEMAL;DNAAF5
4172	PORTHOMCL4172[AjBfCgCiDrLvMmOjOlPsSpXl|(16 genes, 12 taxa)]:	0	-0.800967	-0.583956	0.00818627	0.119559	0.132147	-0.83113	0.416993	-0.863294	-0.752644	-0.524316	-0.713418			RECQL4	RECQL4.L;RECQL4	RECQL4	RECQL4	ATP-DEPENDENT DNA HELICASE Q4	CABZ01066436.1	RECQ4_HUMAN	HYPOTHETICAL PROTEIN;PUTATIVE ATP-DEPENDENT DNA HELICASE Q4;RECQL4	RECQ4_HUMAN	ATP-DEPENDENT DNA HELICASE Q4;ATP-DEPENDENT DNA HELICASE Q4-LIKE, TRANSCRIPT VARIANT X1; ATP-DEPENDENT DNA HELICASE Q4-LIKE, TRANSCRIPT VARIANT X2;ATP-DEPENDENT DNA HELICASE Q4-LIKE;RECQL4
8175	PORTHOMCL8175[AjCgCiDrGgLvOjOlPsSpXl|(11 genes, 11 taxa)]:	-0.471868	-0.95367	0	0.389167	0.0908333	0.566294	-0.887558	0	-0.654231	-0.771044	-0.714933	-0.713403		ACRC		ACRC.L	GCNA	ACRC	UNCHARACTERIZED LOC100181834		ACRC_HUMAN	PUTATIVE ACIDIC REPEAT-CONTAINING PROTEIN	ACRC_HUMAN	ACIDIC REPEAT-CONTAINING PROTEIN
7903	PORTHOMCL7903[AjBfCgCiDrLvMmOjOlSpXl|(11 genes, 11 taxa)]:	0	0	0.580769	-0.209461	-0.462549	0.613353	-0.831364	-0.581851	-0.765382	-0.683158	-0.691054	-0.713198			KAT2B	KAT2A.L	KAT2A	KAT2A	HISTONE ACETYLTRANSFERASE KAT2A;KAT2B		KAT2B	HISTONE ACETYLTRANSFERASE KAT2B	KAT2B_HUMAN	HISTONE ACETYLTRANSFERASE KAT2B;KAT2B
2800	PORTHOMCL2800[AjBfCgCiDrGgLvMmOjOlPsSpXl|(18 genes, 13 taxa)]:	0.045	-0.657934	-0.788956	0.0601471	-0.0253676	0.541	-0.721052	-0.337107	-0.828029	-0.771249	-0.539583	-0.712954	EXTL3	EXTL3	EXTL3	EXTL3.L;EXTL3.S;EXTL3	EXTL3	EXTL3	EXOSTOSIN-LIKE 3, TRANSCRIPT VARIANT X1; EXOSTOSIN-LIKE 3, TRANSCRIPT VARIANT X2;EXTL3	EXTL3	EXTL3_HUMAN;EXTL3	PUTATIVE EXOSTOSIN-LIKE 3;EXTL3	EXTL3_HUMAN;EXTL3	EXOSTOSIN-LIKE 3, TRANSCRIPT VARIANT X2; EXOSTOSIN-LIKE 3, TRANSCRIPT VARIANT X1;EXTL3
1607	PORTHOMCL1607[BfCgCiDrGgLvMmOjOlPsSpXl|(24 genes, 12 taxa)]:	0.0573626	-0.736923	-0.826758	-0.115025	-0.129828	0.483588	-0.675065	0.702867	-0.719206	-0.855975	-0.563603	-0.712928	RBM4B	RBM4B	RBM4B;RBM4;GM21992	RBM4.L;RBM4B.S;RBM4B.L;RBM4B	RBM4.3 (1 OF MANY);RBM4.1;RNA-BINDING PROTEIN 4;RBM14A	ZGC:77262;RBM4.1;RBM4.2;CABZ01058031.1;RBM14B	RNA-BINDING PROTEIN 4B-LIKE		LARK_DROME		RBM4_MACFA	RNA-BINDING PROTEIN 4.1, TRANSCRIPT VARIANT X4; RNA-BINDING PROTEIN 4.1, TRANSCRIPT VARIANT X5; RNA-BINDING PROTEIN 4.1, TRANSCRIPT VARIANT X3; RNA-BINDING PROTEIN 4.1, TRANSCRIPT VARIANT X1; RNA-BINDING PROTEIN 4.1, TRANSCRIPT VARIANT X2
2583	PORTHOMCL2583[AjBfCgCiDrGgLvMmOjOlPsSpXl|(19 genes, 13 taxa)]:	-0.597198	-0.824176	-0.798956	0.305858	0.0809804	0.724912	-0.765442	0.43	-0.710735	-0.750237	-0.677206	-0.712726	NCAPD2	NCAPD2	NCAPD2	NCAPD2.S;NCAPD2	NCAPD2	NCAPD2	CONDENSIN COMPLEX SUBUNIT 1;LOC100185221	NCAPD2	CND1_XENLA;NCAPD2	PUTATIVE CONDENSIN COMPLEX SUBUNIT 1;PUTATIVE CALMODULIN-BINDING TRANSCRIPTION ACTIVATOR 1-LIKE	CND1_XENLA	CONDENSIN COMPLEX SUBUNIT 1;CONDENSIN COMPLEX SUBUNIT 1-LIKE
4972	PORTHOMCL4972[AjBfCgCiDrGgLvMmOjOlPsSpXl|(15 genes, 13 taxa)]:	-0.417418	-0.614242	-0.601758	-0.311348	-0.251912	-0.124618	-0.275558	-0.61127	-0.836647	-0.535996	-0.765196	-0.712613	NOC2L	NOC2L	NOC2L	NOC2L.S;NOC2L.L;NOC2L	NOC2L	NOC2L	NUCLEOLAR COMPLEX PROTEIN 2 HOMOLOG, TRANSCRIPT VARIANT X1; NUCLEOLAR COMPLEX PROTEIN 2 HOMOLOG, TRANSCRIPT VARIANT X2;NOC2L	NOC2L	NOC2L_MOUSE;NOC2L	PUTATIVE NUCLEOLAR COMPLEX PROTEIN 2-LIKE	NOC2L_BOVIN;NOC2L	NUCLEOLAR COMPLEX PROTEIN 2 HOMOLOG;NOC2L
7333	PORTHOMCL7333[AjBfCgDrGgLvMmOjOlPsSpXl|(12 genes, 12 taxa)]:	-0.291154	-0.599868	-0.502253	-0.204632	0.180711	-0.458029	0	-0.881672	-0.817353	-0.783117	-0.537132	-0.712534	UBIAD1	UBIAD1	UBIAD1	UBIAD1.L;UBIAD1	UBIAD1	UBIAD1		UBIAD1	UBIA1_DANRE	PUTATIVE UBIA PRENYLTRANSFERASE DOMAIN-CONTAINING PROTEIN 1-LIKE;UBIAD1	UBIA1_AILME;UBIAD1	UBIA PRENYLTRANSFERASE DOMAIN-CONTAINING PROTEIN 1-LIKE;UBIAD1
1638	PORTHOMCL1638[AjBfCgCiDrGgLvMmOjOlPsSpXl|(23 genes, 13 taxa)]:	-0.472637	-0.333582	0.249615	-0.202794	0.0193627	0.353441	-0.482156	-0.618639	-0.898324	-0.850526	-0.38848	-0.712443	CYCS	CYCS	GM10053;CYCS;CYCT	CYCS.S;CYCT.L;CYCS	CYTOCHROME C ISO-1/ISO-2	CYCSB	CYTOCHROME C-LIKE;CYTOCHROME C, SOMATIC;CYCS	CYCS	CYC_PECGU;CYC	PUTATIVE CYTOCHROME C;PUTATIVE CYTOCHROME C, SOMATIC-LIKE;CYC	CYC_PECGU	CYTOCHROME C;CYTOCHROME C, SOMATIC-LIKE
3526	PORTHOMCL3526[AjBfCgCiDrGgLvMmOjOlPsSpXl|(17 genes, 13 taxa)]:	-0.36989	-0.587033	-0.561099	0.369289	0.110539	0.718294	-0.878234	-0.366643	-0.7365	-0.674799	-0.725368	-0.712222	SNRNP40	SNRNP40	SNRNP40	SNRNP40.L;SNRNP40.S;SNRNP40	SNRNP40	SNRNP40	U5 SMALL NUCLEAR RIBONUCLEOPROTEIN 40 KDA PROTEIN-LIKE;SNRNP40	SNRNP40	SNR40_HUMAN;SNRNP40	PUTATIVE U5 SMALL NUCLEAR RIBONUCLEOPROTEIN 40 KDA PROTEIN;SNRNP40	HETE1_PODAS;SNR40_HUMAN;SNRNP40	U5 SMALL NUCLEAR RIBONUCLEOPROTEIN 40 KDA PROTEIN;SNRNP40
5570	PORTHOMCL5570[AjBfCgCiDrGgLvMmOjOlPsSpXl|(14 genes, 13 taxa)]:	-0.610934	-0.526989	-0.544286	0.220025	0.280221	-0.0301176	-0.771	0	-0.871824	-0.775707	-0.488603	-0.712044	AFDN	MLLT4;AFDN	AFDN	LOC496335;MLLT4.L;MLLT4;AFDN	AFDNA;MLLT4	MLLT4A;MLLT4	AFADIN, TRANSCRIPT VARIANT X1; AFADIN, TRANSCRIPT VARIANT X2		AFAD_HUMAN	PUTATIVE AFADIN ISOFORM X3	AFAD_HUMAN	AFADIN, TRANSCRIPT VARIANT X1; AFADIN, TRANSCRIPT VARIANT X2; AFADIN, TRANSCRIPT VARIANT X3
6178	PORTHOMCL6178[AjCgDrGgLvMmOjOlPsSpXl|(13 genes, 11 taxa)]:	0.0969231	-0.193978	-0.489451	-0.0504902	-0.0178922	0.0973529	0	0	-0.870324	-0.783839	-0.48174	-0.711968	ING1	ING1	ING1	ING1.S;LOC108708460;ING1	ING1	ING1			ING1_MOUSE;ING2	PUTATIVE INHIBITOR OF GROWTH PROTEIN 1-LIKE;ING2	ING1_MOUSE;ING2	INHIBITOR OF GROWTH PROTEIN 1-LIKE;ING2
1790	PORTHOMCL1790[AjBfCgCiDrGgLvMmOjOlPsSpXl|(22 genes, 13 taxa)]:	0.568297	0.043956	-0.725934	-0.344755	0.132132	0.0824706	-0.907688	-0.532867	-0.7235	-0.747678	-0.663235	-0.711471	MIGA2;MIGA1	FAM73A;MIGA1;MIGA2	MIGA2;MIGA1	FAM73B.L;LOC108699951;MIGA2	MIGA2;MIGA1	FAM73B;FAM73A;MIGA2;MIGA1	MITOGUARDIN-2-LIKE, TRANSCRIPT VARIANT X1; MITOGUARDIN-2-LIKE, TRANSCRIPT VARIANT X2; MITOGUARDIN-2-LIKE, TRANSCRIPT VARIANT X3; MITOGUARDIN-2-LIKE, TRANSCRIPT VARIANT X4		MIGA2_DANRE	HYPOTHETICAL PROTEIN	MIGA2_DANRE	PROTEIN FAM73B
7617	PORTHOMCL7617[AjBfCgCiDrLvMmOjOlSpXl|(12 genes, 11 taxa)]:	0	0	-0.552418	-0.115466	-0.237598	0.158706	-0.84461	0.206014	-0.712618	-0.831806	-0.589461	-0.711295			DNTTIP2	DNTTIP2.L;DNTTIP2	DNTTIP2	DNTTIP2	DEOXYNUCLEOTIDYLTRANSFERASE TERMINAL-INTERACTING PROTEIN 2		TDIF2_HUMAN;DNTTIP2	PUTATIVE DEOXYNUCLEOTIDYLTRANSFERASE TERMINAL-INTERACTING PROTEIN 2	TDIF2_HUMAN	DEOXYNUCLEOTIDYLTRANSFERASE TERMINAL-INTERACTING PROTEIN 2
3971	PORTHOMCL3971[AjBfCgCiDrGgLvMmOjOlPsSpXl|(16 genes, 13 taxa)]:	-0.551374	-0.791385	-0.56478	-0.249118	-0.0910294	0.0450588	-0.872208	-0.671888	-0.863971	-0.813684	-0.454412	-0.710689	RPF1	RPF1	RPF1	RPF1.S;RPF1.L;RPF1	RPF1	RPF1	RIBOSOME PRODUCTION FACTOR 1-LIKE;RPF1	RPF1	RPF1_XENLA;RPF1	HYPOTHETICAL PROTEIN;PUTATIVE RIBOSOME PRODUCTION FACTOR 1;RPF1	RPF1_RAT	RIBOSOME PRODUCTION FACTOR 1;RPF1
3569	PORTHOMCL3569[AjBfCgCiDrGgLvMmOjOlPsSpXl|(17 genes, 13 taxa)]:	-0.699066	-0.730505	-0.545385	-0.691054	-0.0248529	0.359235	-0.0114286	-0.44442	-0.827794	-0.622208	-0.681863	-0.710622	TTC27	TTC27	TTC27	TTC27.L;TTC27	TTC27	TTC27	TETRATRICOPEPTIDE REPEAT PROTEIN 27;TTC27	TTC27	TTC27_CHICK	PUTATIVE TETRATRICOPEPTIDE REPEAT PROTEIN 27;TTC27	TTC27_BOVIN;TTC27	TETRATRICOPEPTIDE REPEAT PROTEIN 27;TETRATRICOPEPTIDE REPEAT PROTEIN 27-LIKE;TTC27
3053	PORTHOMCL3053[AjCiDrGgLvMmOjOlPsSpXl|(18 genes, 11 taxa)]:	-0.431429	-0.543473	-0.550495	-0.678111	-0.558578	0.0514118	-0.649532	0	-0.728676	-0.89354	-0.509578	-0.710598	GEMIN5	GEMIN5	GEMIN5	LOC108710817;GEMIN5.L;LOC108710194;GEMIN5	GEMIN5	GEMIN5	GEM-ASSOCIATED PROTEIN 5		GEMI5_MOUSE	PUTATIVE GEM-ASSOCIATED PROTEIN 5-LIKE;PUTATIVE GEM-ASSOCIATED PROTEIN 5	GEMI5_HUMAN	GEM-ASSOCIATED PROTEIN 5
3718	PORTHOMCL3718[AjBfCgCiDrLvMmOjOlPsSpXl|(16 genes, 12 taxa)]:	0	-0.0632088	-0.552967	-0.353848	-0.362059	0.0393824	-0.904169	0	-0.868811	-0.636987	-0.62598	-0.710593		GRWD1	GRWD1	GRWD1-B;GRWD1.L;GRWD1	GRWD1	GRWD1	GLUTAMATE-RICH WD REPEAT-CONTAINING PROTEIN 1-LIKE;GRWD1	GRWD1	GRWD1_RAT;GRWD1	PUTATIVE GLUTAMATE-RICH WD REPEAT-CONTAINING PROTEIN 1 ISOFORM X2;PUTATIVE GLUTAMATE-RICH WD REPEAT-CONTAINING PROTEIN 1 ISOFORM X1;GRWD1	GRWD1_MOUSE	GLUTAMATE-RICH WD REPEAT-CONTAINING PROTEIN 1, TRANSCRIPT VARIANT X2; GLUTAMATE-RICH WD REPEAT-CONTAINING PROTEIN 1, TRANSCRIPT VARIANT X1;GRWD1
6853	PORTHOMCL6853[CgDrGgLvMmOjOlPsSpXl|(13 genes, 10 taxa)]:	0.61956	-0.201319	-0.121429	-0.628064	0.481005	-0.76	0	0	-0.724853	-0.86066	-0.545588	-0.710367	CYFIP2	CYFIP2	CYFIP2	CYFIP2.S;CYFIP2	CYFIP1;CYFIP2	CYFIP2			CYFP2_MOUSE		CYFP2_MOUSE;CYFP2_HUMAN	CYTOPLASMIC FMR1-INTERACTING PROTEIN 2, TRANSCRIPT VARIANT X6; CYTOPLASMIC FMR1-INTERACTING PROTEIN 2, TRANSCRIPT VARIANT X5; CYTOPLASMIC FMR1-INTERACTING PROTEIN 2, TRANSCRIPT VARIANT X4; CYTOPLASMIC FMR1-INTERACTING PROTEIN 2, TRANSCRIPT VARIANT X1; CYTOPLASMIC FMR1-INTERACTING PROTEIN 2, TRANSCRIPT VARIANT X2; CYTOPLASMIC FMR1-INTERACTING PROTEIN 2, TRANSCRIPT VARIANT X3;CYTOPLASMIC FMR1-INTER…
4115	PORTHOMCL4115[AjBfCgCiDrGgLvMmOjOlPsSpXl|(16 genes, 13 taxa)]:	-0.478736	-0.482945	-0.452308	-0.235319	-0.00620098	0.474382	-0.78626	-0.746432	-0.877206	-0.500144	-0.753676	-0.710342	ANAPC10	ANAPC10	ANAPC10	ANAPC10.L;ANAPC10.S;ANAPC10	ANAPC10	ANAPC10	ANAPHASE-PROMOTING COMPLEX SUBUNIT 10-LIKE;ANAPC10	ANAPC10	APC10_MOUSE;ANAPC10	PUTATIVE ANAPHASE-PROMOTING COMPLEX SUBUNIT 10;ANAPC10	APC10_MOUSE;ANAPC10	ANAPHASE-PROMOTING COMPLEX SUBUNIT 10;ANAPC10
6862	PORTHOMCL6862[AjBfCiDrGgLvMmOjOlPsSpXl|(13 genes, 12 taxa)]:	-0.453022	-0.737934	-0.518626	-0.0757843	-0.313554	-0.253794	-0.772701	0.0698601	-0.656147	-0.662436	-0.811765	-0.710116	MTPAP	MTPAP	MTPAP	LOC108718472;MTPAP	MTPAP	MTPAP	POLY(A) RNA POLYMERASE, MITOCHONDRIAL			PUTATIVE POLY(A) RNA POLYMERASE, MITOCHONDRIAL	PAPD1_HUMAN;MTPAP	POLY(A) RNA POLYMERASE, MITOCHONDRIAL;MTPAP
5347	PORTHOMCL5347[AjBfCgCiDrGgLvMmOjOlPsSpXl|(14 genes, 13 taxa)]:	-0.463022	-0.953714	-0.682253	-0.0868382	0.318897	0.288912	-0.880013	0	-0.746235	-0.803013	-0.580147	-0.709799	PEX13	PEX13	PEX13	LOC108716596;PEX13	PEX13	PEX13	PEROXISOMAL MEMBRANE PROTEIN PEX13;PEX13	PEX13	PEX13_HUMAN;PEX13	PUTATIVE PEROXISOMAL MEMBRANE PROTEIN PEX13 ISOFORM X2;PEX13	PEX13_MOUSE	PEROXISOMAL MEMBRANE PROTEIN PEX13, TRANSCRIPT VARIANT X2; PEROXISOMAL MEMBRANE PROTEIN PEX13, TRANSCRIPT VARIANT X1;PEROXISOMAL MEMBRANE PROTEIN PEX13;PEX13
1526	PORTHOMCL1526[AjBfCgCiDrGgLvMmOjOlPsSpXl|(24 genes, 13 taxa)]:	0.220714	-0.705407	-0.803901	0.29625	0.00259804	0.0887647	-0.901299	-0.602859	-0.867029	-0.818328	-0.44375	-0.709703	PPP6R3;PPP6R2	PPP6R3;PPP6R2	PPP6R3;PPP6R2;PPP6R1	PPP6R3.L;PPP6R2.L;PPP6R3.S;PPP6R1.L;PPP6R1.S;PPP6R2;PPP6R3;PPP6R1	PPP6R3;PPP6R2A	PPP6R3;PPP6R2A;PPP6R2B;PPP6R2	SERINE/THREONINE-PROTEIN PHOSPHATASE 6 REGULATORY SUBUNIT 3, TRANSCRIPT VARIANT X1; SERINE/THREONINE-PROTEIN PHOSPHATASE 6 REGULATORY SUBUNIT 3, TRANSCRIPT VARIANT X2; SERINE/THREONINE-PROTEIN PHOSPHATASE 6 REGULATORY SUBUNIT 3, TRANSCRIPT VARIANT X3;PPP6R2	PPP6R3	P6R3A_XENLA;PPP6R3	PUTATIVE SERINE/THREONINE-PROTEIN PHOSPHATASE 6 REGULATORY SUBUNIT 3 ISOFORM X1;PPP6R3	PP6R3_HUMAN	SERINE/THREONINE-PROTEIN PHOSPHATASE 6 REGULATORY SUBUNIT 3, TRANSCRIPT VARIANT X3; SERINE/THREONINE-PROTEIN PHOSPHATASE 6 REGULATORY SUBUNIT 3, TRANSCRIPT VARIANT X2; SERINE/THREONINE-PROTEIN PHOSPHATASE 6 REGULATORY SUBUNIT 3, TRANSCRIPT VARIANT X4
5612	PORTHOMCL5612[AjBfCgCiDrGgLvMmOjOlPsSpXl|(14 genes, 13 taxa)]:	-0.431099	-0.801363	-0.623791	0.411814	0.0972059	0.688412	-0.72661	0.235229	-0.775941	-0.773044	-0.579044	-0.709343		PRPF4B	PRPF4B	PRPF4B.S	PRPF4BB	PRPF4BB	SERINE/THREONINE-PROTEIN KINASE PRP4 HOMOLOG, TRANSCRIPT VARIANT X2;PRPF4B	PRPF4B	PRP4B_HUMAN;PRPF4B	PUTATIVE SERINE/THREONINE-PROTEIN KINASE PRP4-LIKE	PRP4B_BOVIN;PRPF4B	SERINE/THREONINE-PROTEIN KINASE PRP4 HOMOLOG;PRPF4B
1209	PORTHOMCL1209[AjBfCgCiDrGgLvMmOjOlPsSpXl|(27 genes, 13 taxa)]:	-0.348462	-0.691121	-0.541648	-0.262549	-0.00205882	0.6925	-0.663494	0.282995	-0.8745	-0.409061	-0.844022	-0.709194	PARN;PNLDC1	PARN;PNLDC1	PARN;PNLDC1	PARN.L;PARN.S;PARN		PARN	POLY(A)-SPECIFIC RIBONUCLEASE PARN;PARN	PARN	PARN_BOVIN;PARN_DANRE;PARN	CHAIN D, NATIVE PARN NUCLEASE DOMAIN;PUTATIVE POLY(A)-SPECIFIC RIBONUCLEASE PARN-LIKE ISOFORM X2;PUTATIVE POLY(A)-SPECIFIC RIBONUCLEASE PARN-LIKE DOMAIN-CONTAINING PROTEIN 1;PUTATIVE POLY(A)-SPECIFIC RIBONUCLEASE PARN ISOFORM X2	PARN_BOVIN;PNDC1_HUMAN;PARN	POLY(A)-SPECIFIC RIBONUCLEASE PARN;POLY(A)-SPECIFIC RIBONUCLEASE PARN-LIKE DOMAIN-CONTAINING PROTEIN 1;POLY(A)-SPECIFIC RIBONUCLEASE PARN-LIKE
1846	PORTHOMCL1846[AjBfCgCiDrGgLvMmOjOlPsSpXl|(22 genes, 13 taxa)]:	-0.551429	-0.850242	-0.680934	0.153088	-0.71872	0.412481	-0.602909	-0.408487	-0.750118	-0.648648	-0.728309	-0.709025	ULK4	ULK4	ULK4	ULK4.L;ULK4	ULK4	ULK4	SERINE/THREONINE-PROTEIN KINASE ULK4-LIKE	ULK4	ULK4_PONAB	PUTATIVE SERINE/THREONINE-PROTEIN KINASE ULK4-LIKE;PUTATIVE SERINE/THREONINE-PROTEIN KINASE ULK4;SERINE/THREONINE-PROTEIN KINASE ULK4	ULK4_PONAB;ULK4	SERINE/THREONINE-PROTEIN KINASE ULK4;ULK4
2163	PORTHOMCL2163[BfCiDrGgLvMmOjOlPsSpXl|(21 genes, 11 taxa)]:	-0.687308	-0.751692	-0.777802	-0.240123	-0.512328	0.498324	-0.746753	-0.477832	-0.862735	-0.838493	-0.425735	-0.708988	RBM12B;RBM12	RBM12B;RBM12	RBM12B1;GM28036;RBM12;RBM12B2;RBM12B	XELAEV18032193M;XELAEV18032190M;RBM12.L;MGC115235;RBM12	RBM12B	RBM12B;RBM12;ZGC:153215	SWAN		RBM12_HUMAN		RBM12_PONAB	UNCHARACTERIZED LOC100888204
4922	PORTHOMCL4922[AjCgCiDrGgLvMmOjOlSpXl|(15 genes, 11 taxa)]:	0.397152	0	0.0102198	0.110439	0.528333	0.0277139	0.141234	0	-0.869441	-0.74194	-0.515074	-0.708818	KLHDC8B		KLHDC8A;KLHDC8B	LOC108715044;LOC108714687;KLHDC8B	KELCH-LIKE PROTEIN 7;KLHDC8B	KLHDC8B	KELCH DOMAIN-CONTAINING PROTEIN 8A-LIKE;F-BOX/KELCH-REPEAT PROTEIN AT1G74510-LIKE		KLD8A_HUMAN	PUTATIVE KELCH DOMAIN-CONTAINING PROTEIN 8A	KLD8A_MOUSE	KELCH DOMAIN-CONTAINING PROTEIN 8A, TRANSCRIPT VARIANT X1; KELCH DOMAIN-CONTAINING PROTEIN 8A, TRANSCRIPT VARIANT X2
4562	PORTHOMCL4562[AjBfCgCiDrLvMmOjOlPsSpXl|(15 genes, 12 taxa)]:	0	-0.26967	-0.592143	0.327279	-0.743725	-0.0632059	-0.642078	0.854266	-0.853471	-0.776264	-0.495221	-0.708318		CARM1	CARM1	CARM1.L;CARM1	CARM1;HISTONE-ARGININE METHYLTRANSFERASE CARM1	CARM1;CARM1L	HISTONE-ARGININE METHYLTRANSFERASE CARM1-LIKE;CARM1	CARM1	CARM1_DANRE;CARM1	PUTATIVE HISTONE-ARGININE METHYLTRANSFERASE CARM1;CARM1	CARM1_XENLA;CARM1	HISTONE-ARGININE METHYLTRANSFERASE CARM1;HISTONE-ARGININE METHYLTRANSFERASE CARM1-LIKE;CARM1
7368	PORTHOMCL7368[BfCiDrGgLvMmOjOlPsSpXl|(12 genes, 11 taxa)]:	-0.6	-0.48633	-0.542143	0.158652	-0.201569	0.558941	-0.938753	0.73007	-0.917588	-0.569536	-0.637745	-0.70829	ARL5B	ARL5B	ARL5B;ARL5C	LOC108718811;ARL5B	ARL8;ARL5B	ARL8;ARL5B	ADP-RIBOSYLATION FACTOR-LIKE PROTEIN 5A;ARL5B		ARL5B_MOUSE;ARL5A		ARL5B_MOUSE	ADP-RIBOSYLATION FACTOR-LIKE PROTEIN 5B, TRANSCRIPT VARIANT X1
2679	PORTHOMCL2679[AjBfCgCiDrGgLvMmOjOlPsSpXl|(19 genes, 13 taxa)]:	-0.141484	-0.440791	-0.653352	0.41076	0.116324	0.443853	-0.067	0.528098	-0.865941	-0.678762	-0.577451	-0.707385	UCK2	UCK2	UCK2	LOC108714503;UCK2.S;UCK2	UCK2B;UCKL1B;UCKL1	UCK2B;UCK2A	URIDINE-CYTIDINE KINASE 2-B-LIKE		UCK2A_DANRE;UCK1	URIDINE-CYTIDINE KINASE 2-B;PUTATIVE URIDINE-CYTIDINE KINASE 2-B;UCK2	UCK2_XENTR	URIDINE-CYTIDINE KINASE 2-B;UCK2
3448	PORTHOMCL3448[AjBfCgCiDrGgLvMmOjOlPsSpXl|(17 genes, 13 taxa)]:	0.298956	-0.427692	-0.858187	0.458848	0.400858	-0.349901	-0.607429	0.375594	-0.616088	-0.785366	-0.720466	-0.707307	B3GLCT	B3GALTL;B3GLCT	B3GLCT	B3GLCT.L;LOC108709947;B3GLCT	B3GLCTA;B3GLCTB	B3GLCTB;B3GLCTA	BETA-1,3-GLUCOSYLTRANSFERASE-LIKE;B3GLCT		B3GLT_MOUSE	HYPOTHETICAL PROTEIN;PUTATIVE BETA-1,3-GLUCOSYLTRANSFERASE-LIKE;B3GLCT	B3GLT_MOUSE;B3GALTLA	BETA-1,3-GLUCOSYLTRANSFERASE
1356	PORTHOMCL1356[AjBfCgCiDrGgLvMmOjOlPsSpXl|(25 genes, 13 taxa)]:	0.349121	-0.408923	-0.420385	0.352157	-0.725392	0.545324	-0.891273	-0.497622	-0.634647	-0.85162	-0.634804	-0.707024	ADPGK	ADPGK	ADPGK	LOC108717798;ADPGK.L;LOC108716645;ADPGK	ADPGK2;ADPGK	ADPGK2;ADPGK	ADP-DEPENDENT GLUCOKINASE-LIKE;ADP-DEPENDENT GLUCOKINASE;ADPGK		ADPGK_MOUSE;ADPGK_BOVIN;ADPGK2;ADPGK	PUTATIVE ADP-DEPENDENT GLUCOKINASE;HYPOTHETICAL PROTEIN;PUTATIVE ADP-DEPENDENT GLUCOKINASE-LIKE;ADPGK	ADPGK_MOUSE	ADP-DEPENDENT GLUCOKINASE;ADP-DEPENDENT GLUCOKINASE-LIKE;ADPGK
3585	PORTHOMCL3585[AjBfCgCiDrLvMmOjOlSpXl|(17 genes, 11 taxa)]:	0	0	0.0751648	0.308652	-0.475172	0.00241176	-0.295234	-0.578671	-0.647743	-0.829327	-0.643799	-0.706956			TONSL	TONSL.L;TONSL.S;TONSL	TONSL	TONSL	TONSOKU-LIKE PROTEIN, TRANSCRIPT VARIANT X1; TONSOKU-LIKE PROTEIN, TRANSCRIPT VARIANT X2		TONSL_DANRE;TONSL_MOUSE	PUTATIVE TONSOKU-LIKE PROTEIN	TONSL_DANRE	TONSOKU-LIKE PROTEIN;UNCHARACTERIZED LOC105436887
5323	PORTHOMCL5323[AjBfCgCiDrGgLvMmOjOlPsSpXl|(14 genes, 13 taxa)]:	-0.0342308	-0.611253	-0.608132	0.182843	-0.624166	-0.0466471	-0.246419	0.418129	-0.894588	-0.659773	-0.564461	-0.706274	POLB	POLB	POLB	POLB.S;POLB	POLB	POLB	DNA POLYMERASE BETA-LIKE, TRANSCRIPT VARIANT X1; DNA POLYMERASE BETA-LIKE, TRANSCRIPT VARIANT X2;POLB	POLB	DPOLB_RAT;POLB	PUTATIVE DNA POLYMERASE BETA;POLB	DPOLB_BOVIN	DNA POLYMERASE BETA, TRANSCRIPT VARIANT X1; DNA POLYMERASE BETA, TRANSCRIPT VARIANT X2;DNA POLYMERASE BETA;POLB
7442	PORTHOMCL7442[AjCiDrGgLvMmOjOlPsSpXl|(12 genes, 11 taxa)]:	-0.367473	-0.634198	-0.569945	0.166814	-0.350245	0.679118	-0.871052	0	-0.831206	-0.748999	-0.53799	-0.706065	XRN2	XRN2	XRN2	XRN2.L	XRN2	XRN2	5'-3' EXORIBONUCLEASE 2, TRANSCRIPT VARIANT X1; 5'-3' EXORIBONUCLEASE 2, TRANSCRIPT VARIANT X3; 5'-3' EXORIBONUCLEASE 2, TRANSCRIPT VARIANT X2;XRN2		XRN2_MOUSE	PUTATIVE 5'-3' EXORIBONUCLEASE 2 ISOFORM X1;XRN2	XRN2_HUMAN;XRN2_PONAB;XRN2	5'-3' EXORIBONUCLEASE 2, TRANSCRIPT VARIANT X1; 5'-3' EXORIBONUCLEASE 2, TRANSCRIPT VARIANT X2; 5'-3' EXORIBONUCLEASE 2, TRANSCRIPT VARIANT X3;XRN2
9302	PORTHOMCL9302[AjBfCgLvOjSp|(9 genes, 6 taxa)]:	0	0	0	0	0	0	0	-0.815267	-0.718176	-0.758885	-0.639216	-0.705426									UBP4_HUMAN	HYPOTHETICAL PROTEIN	UBP4_RAT	UNCHARACTERIZED LOC583829
6451	PORTHOMCL6451[AjBfCgCiDrGgLvMmOjOlPsSpXl|(13 genes, 13 taxa)]:	-0.681978	-0.798901	-0.609231	0.420221	-0.322426	-0.230206	-0.451896	-0.514825	-0.678588	-0.900846	-0.536765	-0.7054	SNRPE	SNRPE	SNRPE	SNRPE.L;SNRPE	SNRPE	SNRPE	SMALL NUCLEAR RIBONUCLEOPROTEIN E-LIKE;SNRPE	SNRPE	RUXE_DANRE	PUTATIVE SMALL NUCLEAR RIBONUCLEOPROTEIN E-LIKE	RUXE_PIG	SMALL NUCLEAR RIBONUCLEOPROTEIN POLYPEPTIDE E-LIKE;SNRPE
2219	PORTHOMCL2219[AjBfCgCiDrGgLvMmOjOlPsSpXl|(20 genes, 13 taxa)]:	-0.0431868	0.466505	-0.214451	-0.0934804	0.436887	-0.336176	-0.107584	-0.214782	-0.826618	-0.737255	-0.552206	-0.705359	UXS1	UXS1	UXS1	UXS1.L;UXS1.S;UXS1	UXS1	UXS1	UDP-GLUCURONIC ACID DECARBOXYLASE 1-LIKE;UXS1	UXS1	UXS1_MOUSE;UXS1	PUTATIVE UDP-GLUCURONIC ACID DECARBOXYLASE 1 ISOFORM X7;PUTATIVE UDP-GLUCURONIC ACID DECARBOXYLASE 1-LIKE;PUTATIVE UDP-GLUCURONIC ACID DECARBOXYLASE 1 ISOFORM X9;PUTATIVE UDP-GLUCURONIC ACID DECARBOXYLASE 1;UXS1	UXS1_MOUSE;UXS1_RAT	UDP-GLUCURONIC ACID DECARBOXYLASE 1-LIKE;UDP-GLUCURONIC ACID DECARBOXYLASE 1;UXS1
2944	PORTHOMCL2944[AjBfCgCiDrGgLvMmOjOlPsSpXl|(18 genes, 13 taxa)]:	-0.792912	-0.821495	-0.589945	0.0215931	-0.491863	0.485441	-0.649844	0.293706	-0.615412	-0.732776	-0.767525	-0.705237	ACTL6A;ACTL6B	ACTL6A	ACTL6A;ACTL6B	ACTL6A.S;LOC108703569;ACTL6B	ACTL6A	ACTL6A;ACTL6B	ACTIN-LIKE PROTEIN 6B, TRANSCRIPT VARIANT X2; ACTIN-LIKE PROTEIN 6B, TRANSCRIPT VARIANT X1;ACTL6B		ACL6A_HUMAN;ACTL6A	PUTATIVE ACTIN-LIKE PROTEIN 6B;PUTATIVE ACTIN-LIKE PROTEIN 6A;ACTL6A	ACL6A_HUMAN	ACTIN-LIKE PROTEIN 6B;ACTL6B
6851	PORTHOMCL6851[AjBfDrGgLvMmOjOlPsSpXl|(13 genes, 11 taxa)]:	0.233297	-0.410286	-0.371154	-0.711544	-0.278799	-0.679647	0	0.400699	-0.900176	-0.702766	-0.512623	-0.705188	NANP	NANP	GM6741;NANP	NANP.L;NANP	NANP	NANP			NANP_MOUSE;NANP	PUTATIVE N-ACYLNEURAMINATE-9-PHOSPHATASE-LIKE;NANP	NANP_RAT;NANP	N-ACYLNEURAMINATE-9-PHOSPHATASE-LIKE;NANP
5200	PORTHOMCL5200[AjBfCgCiDrGgLvMmOjOlPsSpXl|(14 genes, 13 taxa)]:	-0.503791	-0.764484	-0.608681	0.169093	-0.601275	0.150765	-0.850896	-0.324685	-0.714441	-0.780144	-0.61973	-0.704772	GINS1	GINS1	GINS1	GINS1.S;GINS1	GINS1	GINS1	DNA REPLICATION COMPLEX GINS PROTEIN PSF1	GINS1	PSF1_BOVIN;GINS1	PUTATIVE DNA REPLICATION COMPLEX GINS PROTEIN PSF1;GINS1	PSF1_MOUSE	DNA REPLICATION COMPLEX GINS PROTEIN PSF1;GINS1
1614	PORTHOMCL1614[AjBfCgCiDrGgLvMmOjOlPsSpXl|(23 genes, 13 taxa)]:	-0.423407	-0.717846	-0.75978	0.116985	-0.419559	0.191324	-0.717896	0	-0.7525	-0.806543	-0.555147	-0.70473		SRSF4	SRSF4	SRSF4.L;KRT5.1-LIKE.2.S;LOC108709565;KRT5.1B;SRSF4;GRM6	SRSF5A;SRSF6A;SRSF6	SRSF5A;SRSF4	SERINE/ARGININE-RICH SPLICING FACTOR 5, TRANSCRIPT VARIANT X1; SERINE/ARGININE-RICH SPLICING FACTOR 5, TRANSCRIPT VARIANT X2;SERINE/ARGININE-RICH SPLICING FACTOR 6-LIKE	SRSF4	SRSF4_MOUSE;SRSF5	PUTATIVE SERINE/ARGININE-RICH SPLICING FACTOR 6 ISOFORM X2;SRSF4	SRSF4_MOUSE	SERINE/ARGININE-RICH SPLICING FACTOR 6, TRANSCRIPT VARIANT X2; SERINE/ARGININE-RICH SPLICING FACTOR 6, TRANSCRIPT VARIANT X1
5244	PORTHOMCL5244[AjBfCgCiDrGgLvMmOjOlPsSpXl|(14 genes, 13 taxa)]:	-0.0635165	0.0901978	-0.286319	-0.29701	-0.30924	-0.678971	-0.753519	-0.706091	-0.8935	-0.72194	-0.498529	-0.704657	NTMT1	NTMT1	NTMT1	NTMT1.S;NTMT1	NTMT1	NTMT1	N-TERMINAL XAA-PRO-LYS N-METHYLTRANSFERASE 1-LIKE;NTMT1	NTMT1	NTM1A_DANRE;NTMT1	PUTATIVE N-TERMINAL XAA-PRO-LYS N-METHYLTRANSFERASE 1-LIKE;NTMT1	NTM1A_DANRE	N-TERMINAL XAA-PRO-LYS N-METHYLTRANSFERASE 1-LIKE
6909	PORTHOMCL6909[AjBfCgCiDrGgLvMmOjOlPsSpXl|(13 genes, 13 taxa)]:	-0.210714	-0.823165	-0.623132	0.347157	0.0968137	-0.386618	-0.874883	0.335035	-0.785176	-0.756842	-0.570833	-0.704284	TAF11	TAF11	TAF11	TAF11.S;TAF11	TAF11	TAF11	TRANSCRIPTION INITIATION FACTOR TFIID SUBUNIT 11-LIKE;TAF11	TAF11	TAF11_HUMAN	PUTATIVE TRANSCRIPTION INITIATION FACTOR TFIID SUBUNIT 11-LIKE	TAF11_PONAB	TRANSCRIPTION INITIATION FACTOR TFIID SUBUNIT 11
8198	PORTHOMCL8198[AjCgCiDrLvMmOjOlSpXl|(11 genes, 10 taxa)]:	0	0	-0.563242	-0.0557843	-0.52223	0.264206	-0.822545	0	-0.787676	-0.797441	-0.527328	-0.704149			HAUS7	HAUS7.S	HAUS7	HAUS7	UNCHARACTERIZED LOC100175780		HAUS7_MOUSE	HYPOTHETICAL PROTEIN	HAUS7_MOUSE	UNCHARACTERIZED LOC581318, TRANSCRIPT VARIANT X2; UNCHARACTERIZED LOC581318, TRANSCRIPT VARIANT X1
903	PORTHOMCL903[AjBfCgCiDrGgLvMmOjOlPsSpXl|(31 genes, 13 taxa)]:	-0.544341	-0.200571	-0.558132	-0.193088	-0.468946	0.720029	0.285571	-0.817406	-0.771412	-0.875893	-0.464461	-0.703922	EIF4A2;EIF4A1	EIF4A2;EIF4A1	EIF4A2;EIF4A1	EIF4A1.S;EIF4A2.L;EIF4A1.L;EIF4A3.S;EIF4A1;EIF4A2	EIF4A1B;EIF4A1	EIF4A1A;EIF4A2;EIF4A1B;EIF4A1	EUKARYOTIC INITIATION FACTOR 4A-I	EIF4A1	IF4A3_RAT;IF4A3_DROME;EIF4A3	EUKARYOTIC TRANSLATION INITIATION FACTOR 4A ISOFORM 1B;TRANSLATION INITIATION FACTOR EIF4A II;EIF4A2	IF4A3_RAT;IF4A_SCHPO;FAL1_MAGO7;EIF4A3	EUKARYOTIC INITIATION FACTOR 4A;EIF4A2
266	PORTHOMCL266[AjBfCgDrGgLvMmOjOlPsSpXl|(63 genes, 12 taxa)]:	0.180879	0.894022	0.491593	-0.469804	-0.441127	-0.792865	0	-0.786643	-0.765676	-0.733395	-0.612377	-0.703816	KRT20	KRT23;KRT17	KRT13;VIM;KRT42;KRT17;KRT20;KRT23;KRT34;KRT16;KRT33A;KRT36;KRT31;KRT33B;KRT40;KRT10;KRT24;KRT35;KRT15	LMNB2.L;KRT19.L;KRT19;KRT12.S;LOC108702471;LOC108700757	KERATIN, TYPE I CYTOSKELETAL 13;DESMB;VIML;NESTIN;VIM;NES	DESMB;KRT15;DESMA;VIML;KRTT1C19E;CYT1L;KRT1-19D;KRT17;KRT91;KRT92;CYT1;CABZ01118678.1;VIM			LMNB1_MOUSE;LMNA	B-TYPE NUCLEAR LAMIN	LMNA_XENLA	NUCLEAR INTERMEDIATE FILAMENT PROTEIN
6618	PORTHOMCL6618[AjBfCgCiDrGgLvMmOjOlSpXl|(13 genes, 12 taxa)]:	-0.46989	0	-0.421099	0.342353	-0.229289	-0.740735	-0.734636	-0.330085	-0.874471	-0.62227	-0.614216	-0.703652	MRPS10		MRPS10	MRPS10.S;MRPS10	MRPS10	MRPS10	28S RIBOSOMAL PROTEIN S10, MITOCHONDRIAL-LIKE;MRPS10	MRPS10	RT10_DANRE;MRPS10	PUTATIVE 28S RIBOSOMAL PROTEIN S10, MITOCHONDRIAL;MRPS10	RT10_DANRE;MRPS10	28S RIBOSOMAL PROTEIN S10, MITOCHONDRIAL;MRPS10
5071	PORTHOMCL5071[AjBfCgCiDrLvMmOjOlSpXl|(15 genes, 11 taxa)]:	0	0	-0.414066	0.272941	0.61519	0.833382	-0.220571	0.51028	-0.726758	-0.740051	-0.643808	-0.703539			PCED1A;PCED1B	PCED1A.S;PCED1A.L;PCED1A	FAM113	FAM113;PCED1A	UNCHARACTERIZED LOC100187110		PED1A_MOUSE	PUTATIVE PC-ESTERASE DOMAIN-CONTAINING PROTEIN 1A	PED1A_HUMAN;PED1A_MOUSE;PCED1A	PC-ESTERASE DOMAIN-CONTAINING PROTEIN 1A
7401	PORTHOMCL7401[AjBfCgCiDrGgLvMmOjOlSpXl|(12 genes, 12 taxa)]:	-0.215659	0	-0.522637	-0.113799	-0.423113	-0.194265	-0.672312	-0.641633	-0.906941	-0.743096	-0.460417	-0.703485	IMP4		IMP4	IMP4.S;IMP4	IMP4	IMP4	U3 SMALL NUCLEOLAR RIBONUCLEOPROTEIN PROTEIN IMP4-LIKE;IMP4	IMP4	IMP4_RAT;IMP4	HYPOTHETICAL PROTEIN	IMP4_HUMAN;IMP4	U3 SMALL NUCLEOLAR RIBONUCLEOPROTEIN PROTEIN IMP4;IMP4
1494	PORTHOMCL1494[AjBfCgCiDrGgLvMmOjOlPsSpXl|(24 genes, 13 taxa)]:	0.083956	-0.674374	-0.744505	0.174608	-0.421348	-0.516868	-0.498623	0.323497	-0.916824	-0.687843	-0.50507	-0.703245	MCAT	MCAT	MCAT	MCAT.S;MCAT.L;MCAT	MCAT	MCAT	MALONYL-COA-ACYL CARRIER PROTEIN TRANSACYLASE, MITOCHONDRIAL;MCAT	MCAT	FABD_HUMAN;FABD_DROME	PUTATIVE MALONYL-COA-ACYL CARRIER PROTEIN TRANSACYLASE, MITOCHONDRIAL-LIKE;MCAT	FABD_MOUSE;MCAT	MALONYL-COA-ACYL CARRIER PROTEIN TRANSACYLASE, MITOCHONDRIAL-LIKE;MCAT
8165	PORTHOMCL8165[AjCgCiGgLvMmOjPsSpXl|(11 genes, 10 taxa)]:	-0.434231	-0.918462	-0.461044	-0.25402	0	0	-0.828558	0	-0.771765	-0.839897	-0.496936	-0.702866	TOMM22	TOMM22	TOMM22	CBY1.S;LOC108715774			MITOCHONDRIAL IMPORT RECEPTOR SUBUNIT TOM22 HOMOLOG;TOMM22		TOM22_MACFA;TOMM22	PUTATIVE MITOCHONDRIAL IMPORT RECEPTOR SUBUNIT TOM22-LIKE;TOMM22	TOM22_RAT	PININ
1170	PORTHOMCL1170[AjBfCgCiDrGgLvMmOjOlPsSpXl|(27 genes, 13 taxa)]:	-0.448956	-0.852308	-0.778352	0.0568873	-0.669412	0.206176	-0.167208	-0.622893	-0.697324	-0.795521	-0.615686	-0.702844	ZFR	ZFR	ZFR;STRBP;ZFR2	ZFR.S;LOC108718421;ZFR	ZFR2;ZFR	ZFR2;ZFR	UNCHARACTERIZED LOC100181347, TRANSCRIPT VARIANT X1; UNCHARACTERIZED LOC100181347, TRANSCRIPT VARIANT X2;ZINC FINGER RNA-BINDING PROTEIN, TRANSCRIPT VARIANT X3; ZINC FINGER RNA-BINDING PROTEIN, TRANSCRIPT VARIANT X1; ZINC FINGER RNA-BINDING PROTEIN, TRANSCRIPT VARIANT X2;UNCHARACTERIZED LOC100180184, TRANSCRIPT VARIANT X3; UNCHARACTERIZED LOC100180184, TRANSCRIPT VARIANT X2; UNCHARACTERIZED LOC10…		ZFR_HUMAN	PUTATIVE ZINC FINGER RNA-BINDING PROTEIN ISOFORM X2;PUTATIVE ZINC FINGER RNA-BINDING PROTEIN ISOFORM X1	ZFR_XENTR;ZFR	ZINC FINGER RNA-BINDING PROTEIN, TRANSCRIPT VARIANT X2; ZINC FINGER RNA-BINDING PROTEIN, TRANSCRIPT VARIANT X1;ZFR
6363	PORTHOMCL6363[AjBfCgDrGgLvMmOjOlSpXl|(13 genes, 11 taxa)]:	0.00643048	0	-0.349121	-0.501936	-0.0803431	-0.873735	0	-0.765883	-0.848176	-0.672693	-0.5875	-0.70279	RABIF		RABIF	RABIF.S;RABIF	RABIF	RABIF		RABIF	MSS4_HUMAN;RABIF	HYPOTHETICAL PROTEIN;RABIF	MSS4_MOUSE;RABIF	GUANINE NUCLEOTIDE EXCHANGE FACTOR MSS4-LIKE;RABIF
5239	PORTHOMCL5239[AjBfCgCiDrGgLvMmOjOlPsSpXl|(14 genes, 13 taxa)]:	-0.0989011	-0.511165	-0.538571	-0.49027	0.0446324	-0.226853	-0.80339	0.451748	-0.739471	-0.649164	-0.718015	-0.702216	AAR2	AAR2	AAR2	AAR2.L;AAR2	AAR2	AAR2	PROTEIN AAR2 HOMOLOG;AAR2	AAR2	AAR2_BOVIN;AAR2	HYPOTHETICAL PROTEIN;AAR2	AAR2_BOVIN	PROTEIN AAR2 HOMOLOG;AAR2
3172	PORTHOMCL3172[AjBfCgCiDrGgLvMmOjOlPsSpXl|(17 genes, 13 taxa)]:	-0.540714	-0.626066	-0.553297	0.0805147	0.0587255	0.533059	-0.749156	-0.374825	-0.687412	-0.814551	-0.604412	-0.702125	PRPF3	PRPF3	PRPF3	PRPF3.S;PRPF3	PRPF3	PRPF3	U4/U6 SMALL NUCLEAR RIBONUCLEOPROTEIN PRP3-LIKE, TRANSCRIPT VARIANT X2;PRPF3	PRPF3	PRPF3_CHICK;PRPF3	PUTATIVE U4/U6 SMALL NUCLEAR RIBONUCLEOPROTEIN PRP3	PRPF3_CHICK;PRPF3	U4/U6 SMALL NUCLEAR RIBONUCLEOPROTEIN PRP3;PRPF3
3042	PORTHOMCL3042[AjBfCiDrGgLvMmOjOlPsSpXl|(18 genes, 12 taxa)]:	0.044011	-0.495165	-0.507253	-0.37799	-0.477892	-0.547147	-0.789	0.0553147	-0.848882	-0.559071	-0.698407	-0.70212	ABCF3	ABCF3	ABCF3	ABCF3.L;ABCF3.S;ABCF3	ABCF3	CABZ01084566.2	ATP-BINDING CASSETTE SUB-FAMILY F MEMBER 1-LIKE;ATP-BINDING CASSETTE SUB-FAMILY F MEMBER 3		ABCF3_MOUSE;ABCF3_HUMAN	PUTATIVE ATP-BINDING CASSETTE SUB-FAMILY F MEMBER 3-LIKE	ABCF3_HUMAN;ABCF1_PIG;ABCF1	ATP-BINDING CASSETTE SUB-FAMILY F MEMBER 3;ABCF3
14877	PORTHOMCL14877[LvOjSp|(4 genes, 3 taxa)]:	0	0	0	0	0	0	0	0	-0.712294	-0.749556	-0.644118	-0.701989									RBM42_XENTR;RBM42		RBM42_XENLA	RNA-BINDING PROTEIN 42;RBM42
4895	PORTHOMCL4895[AjBfCgCiDrGgLvMmOjOlPsSpXl|(15 genes, 13 taxa)]:	-0.36533	-0.811429	-0.541429	0.121936	-0.336495	0.143706	-0.80113	-0.547864	-0.826059	-0.689886	-0.589461	-0.701802	ICMT	ICMT	ICMT	ICMT.S;ICMT.L;ICMT	ICMT	ICMT	PROTEIN-S-ISOPRENYLCYSTEINE O-METHYLTRANSFERASE-LIKE, TRANSCRIPT VARIANT X2; PROTEIN-S-ISOPRENYLCYSTEINE O-METHYLTRANSFERASE-LIKE, TRANSCRIPT VARIANT X1	ICMT	ICMT_XENLA;ICMT	PUTATIVE PROTEIN-S-ISOPRENYLCYSTEINE O-METHYLTRANSFERASE;ICMT	ICMT_XENLA;ICMT	PROTEIN-S-ISOPRENYLCYSTEINE O-METHYLTRANSFERASE;PROTEIN-S-ISOPRENYLCYSTEINE O-METHYLTRANSFERASE-LIKE;ICMT;EOG090X0CFU
1222	PORTHOMCL1222[AjBfCgCiDrGgLvMmOjOlPsSpXl|(27 genes, 13 taxa)]:	-0.838407	-0.677363	-0.193571	-0.563676	0.552598	0.106471	0.244597	-0.0538462	-0.797765	-0.741135	-0.566054	-0.701651	PCTP	STARD7;PCTP	STARD7;PCTP	STARD7.L;STARD7.S;STARD7	STARD7;PCTP	STARD7;PCTP	STAR-RELATED LIPID TRANSFER PROTEIN 7, MITOCHONDRIAL-LIKE;PHOSPHATIDYLCHOLINE TRANSFER PROTEIN-LIKE	STARD7;PCTP	STAR7_MOUSE;PPCT_HUMAN;PCTP	PUTATIVE STAR-RELATED LIPID TRANSFER PROTEIN 7, MITOCHONDRIAL;STARD7	STAR7_MOUSE;PPCT_RAT;STARD7	STAR-RELATED LIPID TRANSFER PROTEIN 7, MITOCHONDRIAL;PHOSPHATIDYLCHOLINE TRANSFER PROTEIN;STARD7;PCTP
1311	PORTHOMCL1311[AjBfCgCiDrGgLvMmOjOlPsSpXl|(26 genes, 13 taxa)]:	-0.00483516	-0.173802	-0.537637	0.416078	0.16402	0.626294	-0.910156	-0.75212	-0.866147	-0.607203	-0.629779	-0.701043	ECSIT	ECSIT;PRPF31	ECSIT;PRPF31	ECSIT.S;PRPF31.S;PRPF31.L;ECSIT;PRPF31	ECSIT;PRPF31	ECSIT;PRPF31	EVOLUTIONARILY CONSERVED SIGNALING INTERMEDIATE IN TOLL PATHWAY, MITOCHONDRIAL-LIKE;U4/U6 SMALL NUCLEAR RIBONUCLEOPROTEIN PRP31;PRPF31	ECSIT;PRPF31	NOTC1_HUMAN	PUTATIVE EVOLUTIONARILY CONSERVED SIGNALING INTERMEDIATE IN TOLL PATHWAY, MITOCHONDRIAL;PUTATIVE U4/U6 SMALL NUCLEAR RIBONUCLEOPROTEIN PRP31;ECSIT;PRPF31	ECSIT_MACFA;PRP31_DANRE;PRPF31	EVOLUTIONARILY CONSERVED SIGNALING INTERMEDIATE IN TOLL PATHWAY, MITOCHONDRIAL;U4/U6 SMALL NUCLEAR RIBONUCLEOPROTEIN PRP31, TRANSCRIPT VARIANT X1; U4/U6 SMALL NUCLEAR RIBONUCLEOPROTEIN PRP31, TRANSCRIPT VARIANT X2;ECSIT;PRPF31
5141	PORTHOMCL5141[AjBfCgCiDrGgLvMmOjOlPsSpXl|(14 genes, 13 taxa)]:	-0.456264	-0.508835	-0.55989	-0.837525	0.0122549	-0.0660588	-0.908545	-0.576224	-0.842294	-0.45775	-0.801103	-0.700382	PIGU	PIGU	PIGU	LOC108701063;LOC108702210;PIGU	PIGU	PIGU	PHOSPHATIDYLINOSITOL GLYCAN ANCHOR BIOSYNTHESIS CLASS U PROTEIN	PIGU	PIGU_HUMAN;PIGU	PUTATIVE PHOSPHATIDYLINOSITOL GLYCAN ANCHOR BIOSYNTHESIS CLASS U PROTEIN-LIKE;PIGU	PIGU_HUMAN;PIGU	PHOSPHATIDYLINOSITOL GLYCAN ANCHOR BIOSYNTHESIS CLASS U PROTEIN
1228	PORTHOMCL1228[AjBfCgCiDrGgLvMmOjOlPsSpXl|(27 genes, 13 taxa)]:	0.130604	-0.707033	-0.825495	-0.251912	-0.490956	-0.0161765	-0.807844	-0.889113	-0.680676	-0.758019	-0.662132	-0.700276	PHLDB1;PHLDB2	PHLDB2;PHLDB1	PHLDB2;PHLDB1	PHLDB1.S;LOC108696447;PHLDB1	PHLDB2B;PHLDB1A;PHLDB1B	PHLDB1B;PHLDB2B;PHLDB2A;PHLDB1A;LOC106612531;LOC106603077	PLECKSTRIN HOMOLOGY-LIKE DOMAIN FAMILY B MEMBER 1, TRANSCRIPT VARIANT X1; PLECKSTRIN HOMOLOGY-LIKE DOMAIN FAMILY B MEMBER 1, TRANSCRIPT VARIANT X5; PLECKSTRIN HOMOLOGY-LIKE DOMAIN FAMILY B MEMBER 1, TRANSCRIPT VARIANT X3; PLECKSTRIN HOMOLOGY-LIKE DOMAIN FAMILY B MEMBER 1, TRANSCRIPT VARIANT X4; PLECKSTRIN HOMOLOGY-LIKE DOMAIN FAMILY B MEMBER 1, TRANSCRIPT VARIANT X2;LOC100186226		PHLB2_HUMAN	PUTATIVE PLECKSTRIN-LIKEY-LIKE DOMAIN FAMILY B MEMBER 1 ISOFORM X2;PUTATIVE PLECKSTRIN-LIKEY-LIKE DOMAIN FAMILY B MEMBER 1 ISOFORM X3	PHLB2_MOUSE	PLECKSTRIN HOMOLOGY-LIKE DOMAIN FAMILY B MEMBER 1, TRANSCRIPT VARIANT X2; PLECKSTRIN HOMOLOGY-LIKE DOMAIN FAMILY B MEMBER 1, TRANSCRIPT VARIANT X1; PLECKSTRIN HOMOLOGY-LIKE DOMAIN FAMILY B MEMBER 1, TRANSCRIPT VARIANT X3; PLECKSTRIN HOMOLOGY-LIKE DOMAIN FAMILY B MEMBER 1, TRANSCRIPT VARIANT X4
4604	PORTHOMCL4604[AjBfCgCiGgLvMmOjOlPsSpXl|(15 genes, 12 taxa)]:	-0.625165	-0.743983	-0.678846	0.349534	0.0551471	0	-0.904818	0.779189	-0.842912	-0.650136	-0.607406	-0.700151	GEN1	GEN1	GEN1	LOC108717192;GEN1	GEN1, HOLLIDAY JUNCTION 5' FLAP ENDONUCLEASE;GEN1		FLAP ENDONUCLEASE GEN HOMOLOG 1		GEN_MOUSE	FLAP ENDONUCLEASE GEN-LIKE 1;PUTATIVE FLAP ENDONUCLEASE GEN-LIKE 1-LIKE;GEN1	GEN_HUMAN	UNCHARACTERIZED LOC100889325
5518	PORTHOMCL5518[AjBfCgCiDrGgLvMmOjOlPsSpXl|(14 genes, 13 taxa)]:	-0.329945	0.0228571	-0.167418	-0.0903676	-0.294191	-0.893775	-0.645065	0	-0.503559	-0.809763	-0.787132	-0.700151	BCS1L	BCS1L	BCS1L	BCS1L.L;BCS1L	BCS1L	BCS1L	MITOCHONDRIAL CHAPERONE BCS1-LIKE;BCS1L		BCS1L	PUTATIVE MITOCHONDRIAL CHAPERONE BCS1;BCS1L	BCS1_DANRE;BCS1L	MITOCHONDRIAL CHAPERONE BCS1;BCS1L
1541	PORTHOMCL1541[AjBfCgCiDrGgLvMmOjOlPsSpXl|(24 genes, 13 taxa)]:	0.370824	-0.724484	-0.806923	-0.150441	0.135343	0.240441	-0.866039	-0.0436713	-0.8225	-0.766543	-0.511275	-0.700106	RCBTB1;RCBTB2	RCBTB1	RCBTB1;RCBTB2	RCBTB2.S;RCBTB1.L;RCBTB1.S;RCBTB2;RCBTB1	RCBTB2;RCBTB1	RCBTB2;RCBTB1	RCC1 AND BTB DOMAIN-CONTAINING PROTEIN 1;RCBTB1	RCBTB1	RCBT1_HUMAN;RCBTB1	PUTATIVE RCC1 AND BTB DOMAIN-CONTAINING PROTEIN 1	RCBT1_HUMAN	RCC1 AND BTB DOMAIN-CONTAINING PROTEIN 1;RCBTB1
4843	PORTHOMCL4843[AjBfCgCiDrGgLvMmOjOlPsSpXl|(15 genes, 13 taxa)]:	-0.593791	-0.77578	-0.489945	-0.129069	-0.0992892	-0.196618	-0.841948	0.542867	-0.773176	-0.626419	-0.700613	-0.700069	RPF2	RPF2	RPF2	RPF2.S;RPF2	RPF2	RPF2	RIBOSOME PRODUCTION FACTOR 2 HOMOLOG, TRANSCRIPT VARIANT X1; RIBOSOME PRODUCTION FACTOR 2 HOMOLOG, TRANSCRIPT VARIANT X2;RPF2	RPF2	RPF2_MOUSE	PUTATIVE RIBOSOME PRODUCTION FACTOR 2-LIKE;RPF2	RPF2_MOUSE;RPF2	RIBOSOME PRODUCTION FACTOR 2 HOMOLOG;RPF2
4364	PORTHOMCL4364[AjBfCgCiDrGgLvMmOjOlPsSpXl|(15 genes, 13 taxa)]:	0.157308	-0.692352	-0.426484	0.190882	-0.0846814	-0.215794	-0.870169	-0.0746853	-0.619353	-0.77193	-0.707108	-0.699464	MND1	MND1	MND1	MND1.L	MND1	MND1	MEIOTIC NUCLEAR DIVISION PROTEIN 1 HOMOLOG;MND1	MND1	MND1_MOUSE;MND1	HYPOTHETICAL PROTEIN;MND1	MND1_MOUSE;MND1	MEIOTIC NUCLEAR DIVISION PROTEIN 1 HOMOLOG;MND1
6903	PORTHOMCL6903[AjBfCgCiDrGgLvMmOjOlPsSp|(13 genes, 12 taxa)]:	-0.424176	-0.596484	-0.880495	0	-0.137549	-0.0328529	-0.911558	0.303497	-0.847765	-0.697379	-0.553186	-0.699443		ZNF407	ZFP407;ZNF407		ZNF407	ZNF407	ZINC FINGER PROTEIN 260, TRANSCRIPT VARIANT X1; ZINC FINGER PROTEIN 260, TRANSCRIPT VARIANT X2;LOC100181901		ZN407_HUMAN	PUTATIVE ZINC FINGER PROTEIN	ZN407_HUMAN	ZINC FINGER PROTEIN 37
2929	PORTHOMCL2929[AjBfCgCiDrGgLvMmOjOlPsSpXl|(18 genes, 13 taxa)]:	0.280275	-0.684132	-0.311923	0.122525	-0.0592157	0.492735	-0.899221	-0.078079	-0.869647	-0.794613	-0.433456	-0.699239	CDYL2;CDYL	CDYL	CDYL;CDYL2	LOC108719116;LOC108720069;CDYL	CDYL;CDYL2	CDYL	CHROMODOMAIN Y-LIKE PROTEIN 2		CDYL_RAT	PUTATIVE CHROMODOMAIN Y-LIKE PROTEIN	CDYL_MOUSE	CHROMODOMAIN Y-LIKE PROTEIN
2881	PORTHOMCL2881[AjBfCgCiDrGgLvMmOjOlPsSpXl|(18 genes, 13 taxa)]:	-0.193022	-0.593407	-0.824835	0.139926	0.185735	-0.136588	-0.856481	-0.581125	-0.824676	-0.665408	-0.607108	-0.699064	COG2	COG2	COG2	LOC108717859;COG2	COG2	COG2	CONSERVED OLIGOMERIC GOLGI COMPLEX SUBUNIT 2-LIKE;COG2	COG2	COG2_HUMAN;COG2	PUTATIVE CONSERVED OLIGOMERIC GOLGI COMPLEX SUBUNIT 2;COG2	COG2_HUMAN;COG2	CONSERVED OLIGOMERIC GOLGI COMPLEX SUBUNIT 2;COG2
4956	PORTHOMCL4956[AjBfCgCiDrGgLvMmOjOlPsSpXl|(15 genes, 13 taxa)]:	0.164945	-0.436747	-0.521758	0.310711	0.00105392	0.509529	-0.908247	0.555874	-0.777794	-0.713106	-0.606127	-0.699009	ZDHHC16	ZDHHC16	ZDHHC16	ZDHHC16.S;ZDHHC16	ZDHHC16B;ZDHHC16A	ZDHHC16A;ZDHHC16B	ZINC FINGER (DHHC)-8, TRANSCRIPT VARIANT X2		ZDH16_MACFA	PUTATIVE PALMITOYLTRANSFERASE ZDHHC16	ZDH16_MOUSE	PROBABLE PALMITOYLTRANSFERASE ZDHHC16
1780	PORTHOMCL1780[AjBfCgCiDrGgLvMmOjOlPsSpXl|(22 genes, 13 taxa)]:	-0.444615	-0.899736	-0.662747	-0.567377	0.0921569	0.232912	-0.766208	-0.0436713	-0.837118	-0.759587	-0.49951	-0.698738	NCAPD3	NCAPD3	NCAPD3	NCAPD3.L;NCAPD3	NCAPD3	NCAPD3	CONDENSIN-2 COMPLEX SUBUNIT D3, TRANSCRIPT VARIANT X1; CONDENSIN-2 COMPLEX SUBUNIT D3, TRANSCRIPT VARIANT X2;LOC100187019		CNDD3_HUMAN	PUTATIVE CONDENSIN-2 COMPLEX SUBUNIT D3-LIKE;PUTATIVE CONDENSIN-2 COMPLEX SUBUNIT D3;PUTATIVE CONDENSIN-2 COMPLEX SUBUNIT D3-LIKE ISOFORM X2;HYPOTHETICAL PROTEIN	CNDD3_HUMAN	CONDENSIN-2 COMPLEX SUBUNIT D3-LIKE;CONDENSIN-2 COMPLEX SUBUNIT D3
3706	PORTHOMCL3706[AjBfCgCiDrGgLvMmOjOlSpXl|(16 genes, 12 taxa)]:	-0.36989	0	-0.607198	0.279044	0.0175245	-0.0881176	-0.879545	-0.262783	-0.846588	-0.736244	-0.511765	-0.698199	IK		IK	IK.L;IK		IK	PROTEIN RED-LIKE;IK	IK	RED_RAT;IK	HYPOTHETICAL PROTEIN;IK	MTMR2_BOVIN;RED_HUMAN	PROTEIN RED, TRANSCRIPT VARIANT X3; PROTEIN RED, TRANSCRIPT VARIANT X2; PROTEIN RED, TRANSCRIPT VARIANT X1; PROTEIN RED, TRANSCRIPT VARIANT X5; PROTEIN RED, TRANSCRIPT VARIANT X6; PROTEIN RED, TRANSCRIPT VARIANT X4
3762	PORTHOMCL3762[AjBfCgCiDrLvMmOjOlPsSpXl|(16 genes, 12 taxa)]:	0	-0.332044	0	-0.0131837	0.298378	0.30197	-0.514026	-0.348392	-0.802382	-0.74128	-0.550123	-0.697928		FRMPD4	FRMPD4	FRMPD4.S;LOC108707528;FRMPD4	TLR7	TLR7	FERM AND PDZ DOMAIN-CONTAINING PROTEIN 4-LIKE, TRANSCRIPT VARIANT X2; FERM AND PDZ DOMAIN-CONTAINING PROTEIN 4-LIKE, TRANSCRIPT VARIANT X1		FRPD4_HUMAN	PUTATIVE FERM AND PDZ DOMAIN-CONTAINING PROTEIN 4-LIKE;HYPOTHETICAL PROTEIN	FRPD4_HUMAN	UNCHARACTERIZED LOC764891
3425	PORTHOMCL3425[AjBfCgCiDrGgLvMmOjOlPsSpXl|(17 genes, 13 taxa)]:	-0.282637	-0.432	-0.481868	-0.0965931	-0.0925245	0.589588	-0.874935	0.434256	-0.579971	-0.791496	-0.721814	-0.69776	ALDH18A1	ALDH18A1	ALDH18A1	ALDH18A1.L;ALDH18A1	ALDH18A1	ALDH18A1	DELTA-1-PYRROLINE-5-CARBOXYLATE SYNTHASE-LIKE;ALDH18A1	ALDH18A1	P5CS_MOUSE;ALDH18A1	PUTATIVE DELTA-1-PYRROLINE-5-CARBOXYLATE SYNTHASE ISOFORM X1;PUTATIVE DELTA-1-PYRROLINE-5-CARBOXYLATE SYNTHASE;PUTATIVE DELTA-1-PYRROLINE-5-CARBOXYLATE SYNTHASE ISOFORM X2	P5CS_MOUSE;ALDH18A1	DELTA-1-PYRROLINE-5-CARBOXYLATE SYNTHASE, TRANSCRIPT VARIANT X2; DELTA-1-PYRROLINE-5-CARBOXYLATE SYNTHASE, TRANSCRIPT VARIANT X1;ALDH18A1
4451	PORTHOMCL4451[AjBfCgCiDrGgLvMmOjOlPsSpXl|(15 genes, 13 taxa)]:	-0.447088	-0.594286	-0.525549	0.281716	0.0504657	0.588235	-0.717286	-0.163471	-0.7995	-0.743901	-0.549877	-0.697759		TYW1	TYW1	TYW1.S;TYW1	TYW1	TYW1	S-ADENOSYL-L-METHIONINE-DEPENDENT TRNA 4-DEMETHYLWYOSINE SYNTHASE	TYW1	TYW1_XENLA	HYPOTHETICAL PROTEIN;PUTATIVE S-ADENOSYL-L-METHIONINE-DEPENDENT TRNA 4-DEMETHYLWYOSINE SYNTHASE	TYW1_DANRE	S-ADENOSYL-L-METHIONINE-DEPENDENT TRNA 4-DEMETHYLWYOSINE SYNTHASE;LARGE2
6354	PORTHOMCL6354[AjBfCgCiDrGgLvMmOjOlSpXl|(13 genes, 12 taxa)]:	0.0524176	0	0.00945055	-0.0223039	-0.459436	0.116529	-0.751481	0.464895	-0.703353	-0.74355	-0.646078	-0.69766	F8A2		F8A	F8A1.L;F8A2	ZGC:101679;F8A2	F8A2	FACTOR VIII INTRON 22 PROTEIN	F8A2	F8I2_MOUSE	PUTATIVE FACTOR VIII INTRON 22 PROTEIN;HYPOTHETICAL PROTEIN;F8A2	F8I2_HUMAN	FACTOR VIII INTRON 22 PROTEIN;F8A2
5393	PORTHOMCL5393[AjBfCgCiDrGgLvMmOjOlPsSpXl|(14 genes, 13 taxa)]:	-0.501078	-0.61833	-0.551648	-0.790368	-0.474412	-0.361235	-0.42613	0.307413	-0.900824	-0.538993	-0.652941	-0.697586		GINS4	GINS4	GINS4.L;GINS4	GINS4	GINS4	DNA REPLICATION COMPLEX GINS PROTEIN SLD5-LIKE, TRANSCRIPT VARIANT X1; DNA REPLICATION COMPLEX GINS PROTEIN SLD5-LIKE, TRANSCRIPT VARIANT X2;GINS4		SLD5_RAT;GINS4	PUTATIVE DNA REPLICATION COMPLEX GINS PROTEIN SLD5;GINS4	SLD5_MOUSE;GINS4	DNA REPLICATION COMPLEX GINS PROTEIN SLD5;GINS4
7839	PORTHOMCL7839[AjBfCgCiLvOjSp|(11 genes, 7 taxa)]:	0	0	0	0	0	0	0.688131	0.488462	-0.856941	-0.830464	-0.405025	-0.697477							PROTEIN ROLLING STONE-LIKE		ROST_DROME	HYPOTHETICAL PROTEIN	ROST_DROME	PROTEIN ROLLING STONE
3749	PORTHOMCL3749[AjBfCgCiDrGgLvMmOjOlPsSpXl|(16 genes, 13 taxa)]:	-0.483352	-0.874462	-0.828571	-0.43598	-0.156397	-0.205118	-0.775818	-0.125064	-0.837824	-0.813519	-0.43848	-0.696608	RFC3	RFC3	RFC3	RFC3.L;RFC3	RFC3	RFC3	REPLICATION FACTOR C SUBUNIT 3-LIKE;RFC3	RFC3	RFC3_HUMAN;RFC3	PUTATIVE REPLICATION FACTOR C SUBUNIT 3;RFC3	RFC3_HUMAN;RFC3	REPLICATION FACTOR C SUBUNIT 3;REPLICATION FACTOR C SUBUNIT 3-LIKE;RFC3
4395	PORTHOMCL4395[AjBfCgCiDrGgLvMmOjOlPsSpXl|(15 genes, 13 taxa)]:	-0.143132	-0.482198	-0.571593	0.0209069	0.084902	0.0695294	-0.81174	-0.799108	-0.788676	-0.713003	-0.588113	-0.696597	SNRPD2	SNRPD2	SNRPD2;GM5449	SNRPD2.L;SNRPD2	SNRPD2	SNRPD2	SMALL NUCLEAR RIBONUCLEOPROTEIN SM D2-LIKE	SNRPD2	SMD2_CAEEL;SNRPD2	PUTATIVE SMALL NUCLEAR RIBONUCLEOPROTEIN SM D2	SMD2_CAEEL	SMALL NUCLEAR RIBONUCLEOPROTEIN SM D2;SNRPD2
1975	PORTHOMCL1975[AjBfCgCiDrGgLvMmOjOlPsSpXl|(21 genes, 13 taxa)]:	0.213297	-0.241495	0.517143	-0.815515	-0.270417	-0.951235	-0.211675	-0.195385	-0.707824	-0.801218	-0.579534	-0.696192	RCN1	RCN1	RCN3;RCN1	RCN3.L;RCN1.S;RCN1.L;RCN3.S;RCN1	RCN3;RCN1	RCN3;RCN1	CALUMENIN HOMOLOGUE		RCN3_BOVIN	PUTATIVE CALUMENIN;CALUMENIN-B	RCN1_TAKRU	CALUMENIN;CALUMENIN, TRANSCRIPT VARIANT X3; CALUMENIN, TRANSCRIPT VARIANT X1; CALUMENIN, TRANSCRIPT VARIANT X2; CALUMENIN, TRANSCRIPT VARIANT X4
9140	PORTHOMCL9140[AjBfCgDrLvOjOlSp|(9 genes, 8 taxa)]:	0	0	0	0	0.6157	0.134284	0	0.680979	-0.837441	-0.687781	-0.562255	-0.695826					CHROMOSOME 22 C14ORF180 HOMOLOG	SI:DKEY-206P8.1			CNST_HUMAN	HYPOTHETICAL PROTEIN		UNCHARACTERIZED LOC100893473
6146	PORTHOMCL6146[AjBfCgDrLvMmOjOlPsSpXl|(13 genes, 11 taxa)]:	0	0.290945	-0.638187	0.516348	-0.799044	0.396147	0	-0.781737	-0.672618	-0.740949	-0.673897	-0.695821			0610010K14RIK	C17ORF49.L;C17ORF49.S	ZGC:92664;RNASEK-C17ORF49	ZGC:103508;ZGC:92664;RNASEK-C17ORF49			BAP18_BOVIN	PUTATIVE CHROMATIN COMPLEXES SUBUNIT BAP18-LIKE	BAP18_BOVIN	CHROMATIN COMPLEXES SUBUNIT BAP18, TRANSCRIPT VARIANT X1; CHROMATIN COMPLEXES SUBUNIT BAP18, TRANSCRIPT VARIANT X2
3017	PORTHOMCL3017[AjBfCgCiDrGgLvMmOjOlSpXl|(18 genes, 12 taxa)]:	0.309231	0	0.153022	0.0931882	0.554142	0.271794	-0.791766	0.368182	-0.716029	-0.709928	-0.661152	-0.695703	PGAP1		PGAP1	PGAP1.L;PGAP1	PGAP1	PGAP1	GPI INOSITOL-DEACYLASE	PGAP1	PGAP1_HUMAN	HYPOTHETICAL PROTEIN	PGAP1_HUMAN	GPI INOSITOL-DEACYLASE;GPI INOSITOL-DEACYLASE-LIKE
6362	PORTHOMCL6362[AjBfCgDrLvMmOjPsSpXl|(13 genes, 10 taxa)]:	0	-0.467253	-0.362198	-0.52826	0	-0.295706	0	0.397343	-0.8555	-0.690258	-0.540931	-0.695563		CLPTM1	CLPTM1	LOC108698525;LOC108700204;CLPTM1		CLPTM1		CLPTM1	CLPT1_DANRE;CLPTM1	PUTATIVE CLEFT LIP AND PALATE TRANSMEMBRANE PROTEIN 1-LIKE	CLPT1_DANRE;CLPTM1	CLEFT LIP AND PALATE TRANSMEMBRANE PROTEIN 1 HOMOLOG;CLPTM1
5405	PORTHOMCL5405[AjCgCiDrGgLvMmOjOlPsSpXl|(14 genes, 12 taxa)]:	-0.0541758	-0.579209	-0.566374	0.290784	-0.498995	0.652618	-0.787844	0	-0.778382	-0.526522	-0.781495	-0.695467	PPIH	PPIH	GM7879;PPIH	PPIH.L;PPIH	PPIH	PPIH	PEPTIDYL-PROLYL CIS-TRANS ISOMERASE CYP22-LIKE, TRANSCRIPT VARIANT X1; PEPTIDYL-PROLYL CIS-TRANS ISOMERASE CYP22-LIKE, TRANSCRIPT VARIANT X2		PPIH_MOUSE;PPIH	PUTATIVE PEPTIDYL-PROLYL CIS-TRANS ISOMERASE H-LIKE;HYPOTHETICAL PROTEIN;PPIH	PPIH_HUMAN	PEPTIDYL-PROLYL CIS-TRANS ISOMERASE H;PPIH
4815	PORTHOMCL4815[AjBfCgCiDrGgLvMmOjOlPsSpXl|(15 genes, 13 taxa)]:	-0.110604	-0.507121	-0.788022	0.0566026	0.0765441	0.215588	-0.701143	0	-0.872265	-0.495302	-0.718382	-0.695316	SREK1	SREK1	SREK1	SREK1.L;SREK1	SRSF11	SREK1	SPLICING REGULATORY GLUTAMINE/LYSINE-RICH PROTEIN 1-LIKE	SREK1	SREK1_RAT;SREK1	HYPOTHETICAL PROTEIN;PUTATIVE SPLICING REGULATORY GLUTAMINE/LYSINE-RICH PROTEIN 1-LIKE;SREK1	SREK1_HUMAN;SREK1	SPLICING REGULATORY GLUTAMINE/LYSINE-RICH PROTEIN 1-LIKE;SREK1
5709	PORTHOMCL5709[AjBfCiDrGgLvMmOjOlPsSpXl|(14 genes, 12 taxa)]:	-0.00263736	-0.814066	-0.512088	-0.0131863	-0.476446	-0.591324	0.328013	-0.866409	-0.5625	-0.868958	-0.653064	-0.69484	SLC35A1	SLC35A1	SLC35A1	SLC35A1.S;SLC35A1.L;SLC35A1	SLC35A1	SLC35A1	CMP-SIALIC ACID TRANSPORTER-LIKE;SLC35A1	SLC35A1	S35A1_HUMAN;SLC35A1	PUTATIVE CMP-SIALIC ACID TRANSPORTER-LIKE;SLC35A2	S35A1_HUMAN;SLC35A1	CMP-SIALIC ACID TRANSPORTER-LIKE;CMP-SIALIC ACID TRANSPORTER, TRANSCRIPT VARIANT X4; CMP-SIALIC ACID TRANSPORTER, TRANSCRIPT VARIANT X2; CMP-SIALIC ACID TRANSPORTER, TRANSCRIPT VARIANT X1; CMP-SIALIC ACID TRANSPORTER, TRANSCRIPT VARIANT X3;SLC35A1;SLC35A3
11961	PORTHOMCL11961[AjBfLvOjSp|(6 genes, 5 taxa)]:	0	0	0	0	0	0	0	0.450888	-0.885794	-0.393557	-0.805147	-0.694833										HYPOTHETICAL PROTEIN		CENTROMERE PROTEIN H
2694	PORTHOMCL2694[AjBfCgCiDrGgLvMmOjOlPsSpXl|(19 genes, 13 taxa)]:	-0.0875824	-0.421758	0.526923	-0.387328	-0.218407	0.157118	-0.869364	-0.192352	-0.668853	-0.766109	-0.649387	-0.694783	LMBRD2	LMBRD2	LMBRD2	LMBRD2.L;LMBRD2.S;LMBRD2	LMBRD2B;LMBRD2	LMBRD2B;LMBRD2A;LMBRD2	LMBR1 DOMAIN-CONTAINING PROTEIN 2-LIKE, TRANSCRIPT VARIANT X2; LMBR1 DOMAIN-CONTAINING PROTEIN 2-LIKE, TRANSCRIPT VARIANT X1;LMBRD2	LMBRD2	LMBD2_XENLA	PUTATIVE LMBR1 DOMAIN-CONTAINING PROTEIN 2;LMBRD2	LMBD2_HUMAN;LMBD2_XENLA	LMBR1 DOMAIN-CONTAINING PROTEIN 2;LMBRD2
5638	PORTHOMCL5638[AjCgCiDrGgLvMmOjOlPsSpXl|(14 genes, 12 taxa)]:	-0.464011	-0.547912	-0.538352	-0.334314	-0.118799	-0.328029	-0.823247	0	-0.931118	-0.540702	-0.61201	-0.69461		NOP2	NOP2	NOP2.L;NOP2	NOP2 NUCLEOLAR PROTEIN;NOP2	NOP2	PROBABLE 28S RRNA (CYTOSINE-C(5))-METHYLTRANSFERASE;NOP2		NOP2_HUMAN	HYPOTHETICAL PROTEIN;NOP2	NOP2_MOUSE;NOP2	25S RRNA (CYTOSINE-C(5))-METHYLTRANSFERASE NOP2;PROBABLE 28S RRNA (CYTOSINE-C(5))-METHYLTRANSFERASE;NOP2;CG8545
1330	PORTHOMCL1330[AjBfCgCiDrGgLvMmOjOlPsSpXl|(26 genes, 13 taxa)]:	0.310495	-0.46022	-0.550385	-0.0373775	-0.00678922	0.123441	-0.662052	0.413007	-0.754353	-0.673416	-0.655147	-0.694305	SPAG9;MAPK8IP3	SPAG9;MAPK8IP3	MAPK8IP3;SPAG9	SPAG9.S;LOC108701159;LOC108696683;SPAG9	MAPK8IP3;C-JUN-AMINO-TERMINAL KINASE-INTERACTING PROTEIN 4;SI:DKEY-17M8.1;SPAG9;SPAG9A	MAPK8IP3;SPAG9A;SPAG9 (1 OF MANY);SI:DKEY-17M8.1	C-JUN-AMINO-TERMINAL KINASE-INTERACTING PROTEIN 4;MAPK8IP3	SPAG9	JIP4_MOUSE	PUTATIVE C-JUN-AMINO-TERMINAL KINASE-INTERACTING PROTEIN 4	JIP4_MOUSE;JIP4_HUMAN	C-JUN-AMINO-TERMINAL KINASE-INTERACTING PROTEIN 4
9200	PORTHOMCL9200[AjBfCgDrLvOjOlSp|(9 genes, 8 taxa)]:	0	0	0	0	-0.100809	0.378088	0	0.0782517	-0.789118	-0.765614	-0.526593	-0.693775					SI:DKEY-122A22.2	SI:DKEY-122A22.2				HYPOTHETICAL PROTEIN		UNCHARACTERIZED LOC100889523, TRANSCRIPT VARIANT X2; UNCHARACTERIZED LOC100889523, TRANSCRIPT VARIANT X1
1104	PORTHOMCL1104[AjBfCgCiDrGgLvMmOjOlPsSpXl|(28 genes, 13 taxa)]:	-0.119945	-0.88211	-0.756703	-0.26152	0.0154902	0.595824	-0.912896	0.809301	-0.876971	-0.685593	-0.51875	-0.693771	CDK2;CDK5;CDK3	CDK3;CDK2	CDK2;CDK5;CDK3-PS;CDK3	CDK5.L;CDK2.L;CDK5;CDK2	CDK2;CDK5	CDK5;CDK2	CYCLIN-DEPENDENT KINASE 2-LIKE, TRANSCRIPT VARIANT X1; CYCLIN-DEPENDENT KINASE 2-LIKE, TRANSCRIPT VARIANT X2;CYCLIN-DEPENDENT-LIKE KINASE 5;CDK2;CDK5		CDK2_HUMAN;CDK5_XENLA;CDK2;CDK5	PUTATIVE CYCLIN-DEPENDENT KINASE 2;CYCLING-DEPENDENT KINASE 5;CDK2;CDK5	CDK2_RAT;CDK5_XENLA;CDK2	CYCLIN-DEPENDENT KINASE 2;CYCLIN-DEPENDENT-LIKE KINASE 5;CDK2
6136	PORTHOMCL6136[AjBfCgCiDrGgLvMmOjOlSpXl|(13 genes, 12 taxa)]:	-0.242857	0	-0.482473	-0.590735	-0.398995	-0.328324	-0.574208	-0.646853	-0.920765	-0.598906	-0.56152	-0.69373	DHODH		DHODH	DHODH.L;DHODH	DHODH	DHODH	DIHYDROOROTATE DEHYDROGENASE (QUINONE), MITOCHONDRIAL-LIKE;DHODH	DHODH	PYRD_MOUSE;DHODH	HYPOTHETICAL PROTEIN	PYRD_BOVIN;DHODH	DIHYDROOROTATE DEHYDROGENASE (QUINONE), MITOCHONDRIAL;DHODH
2904	PORTHOMCL2904[AjBfCgCiDrGgLvMmOjOlPsSpXl|(18 genes, 13 taxa)]:	-0.617143	-0.917846	-0.692308	-0.672623	-0.212966	0.147824	-0.616442	-0.685325	-0.660553	-0.809309	-0.610662	-0.693508	ECT2	ECT2	ECT2	ECT2.S	ECT2	ECT2	PROTEIN ECT2, TRANSCRIPT VARIANT X2; PROTEIN ECT2, TRANSCRIPT VARIANT X1;PROTEIN ECT2-LIKE, TRANSCRIPT VARIANT X1; PROTEIN ECT2-LIKE, TRANSCRIPT VARIANT X2; PROTEIN ECT2-LIKE, TRANSCRIPT VARIANT X3	ECT2	ECT2_HUMAN;ECT2	HYPOTHETICAL PROTEIN;ECT2	ECT2_HUMAN;ECT2	PROTEIN ECT2, TRANSCRIPT VARIANT X1; PROTEIN ECT2, TRANSCRIPT VARIANT X2;PROTEIN ECT2-LIKE;ECT2
16640	PORTHOMCL16640[LvOjSp|(3 genes, 3 taxa)]:	0	0	0	0	0	0	0	0	-0.923118	-0.810877	-0.346324	-0.693439									ATD3A_XENLA;ATAD3A		ATD3B_XENLA	ATPASE FAMILY AAA DOMAIN-CONTAINING PROTEIN 3-B;ATAD3A
1578	PORTHOMCL1578[AjBfCgDrGgLvMmOjOlPsSpXl|(24 genes, 12 taxa)]:	0.294176	-0.114286	-0.434396	0.0726181	0.56098	-0.718234	0	-0.522506	-0.889088	-0.655624	-0.535172	-0.693295	SFMBT2;SFMBT1	SFMBT1;SFMBT2	SFMBT1;SFMBT2	SFMBT2.L;SFMBT2.S;SFMBT2	SFMBT2;SFMBT1	SFMBT2;SFMBT1		SFMBT2	SMBT2_HUMAN	PUTATIVE SCM-LIKE WITH FOUR MBT DOMAINS PROTEIN 2 ISOFORM X3;PUTATIVE SCM-LIKE WITH FOUR MBT DOMAINS PROTEIN 2 ISOFORM X4;SFMBT1	SMBT2_HUMAN	SCM-LIKE WITH FOUR MBT DOMAINS PROTEIN 1;SCM-LIKE WITH FOUR MBT DOMAINS PROTEIN 2, TRANSCRIPT VARIANT X3; SCM-LIKE WITH FOUR MBT DOMAINS PROTEIN 2, TRANSCRIPT VARIANT X1; SCM-LIKE WITH FOUR MBT DOMAINS PROTEIN 2, TRANSCRIPT VARIANT X2; SCM-LIKE WITH FOUR MBT DOMAINS PROTEIN 2, TRANSCRIPT VARIANT X4;NASCENT POLYPEPTIDE-ASSOCIATED COMPLEX SUBUNIT ALPHA, MUSCLE-SPECIFIC FORM, TRANSCRIPT VARIANT X2; …
3865	PORTHOMCL3865[AjBfCgCiDrLvMmOjOlSpXl|(16 genes, 11 taxa)]:	0	0	0.61033	-0.278431	0.000882353	-0.0816176	-0.434065	-0.787563	-0.796029	-0.635893	-0.647794	-0.693239			SLC35A2	SLC35A2.S;SLC35A2.L;SLC35A2	SLC35A2	SLC35A2;SI:DKEY-83K24.5	UDP-GALACTOSE TRANSLOCATOR;SLC35A2	SLC35A2	S35A2_CANLF;SLC35A2	PUTATIVE UDP-GALACTOSE TRANSLOCATOR ISOFORM X1;HYPOTHETICAL PROTEIN	S35A2_BOVIN;SLC35A2	UDP-GALACTOSE TRANSLOCATOR, TRANSCRIPT VARIANT X3; UDP-GALACTOSE TRANSLOCATOR, TRANSCRIPT VARIANT X2; UDP-GALACTOSE TRANSLOCATOR, TRANSCRIPT VARIANT X1;SLC35A2
1832	PORTHOMCL1832[AjBfCgCiDrGgLvMmOjOlPsSpXl|(22 genes, 13 taxa)]:	-0.297692	-0.85622	-0.630055	0.333431	-0.040098	0.710765	-0.863	-0.427918	-0.836647	-0.761672	-0.479657	-0.692659	SRSF1	SRSF1	SRSF1	LOC108708917;SRSF1.L;SRSF1	SERINE/ARGININE-RICH SPLICING FACTOR 1B;SRSF1A;SRSF1	SRSF1A;SRSF1B;SRSF1	SERINE/ARGININE-RICH SPLICING FACTOR 1B, TRANSCRIPT VARIANT X3; SERINE/ARGININE-RICH SPLICING FACTOR 1B, TRANSCRIPT VARIANT X2; SERINE/ARGININE-RICH SPLICING FACTOR 1B, TRANSCRIPT VARIANT X1;SERINE/ARGININE-RICH SPLICING FACTOR 1A;SRSF1		SRSF1_CHICK	PUTATIVE SERINE/ARGININE-RICH SPLICING FACTOR 1B-LIKE ISOFORM X3;PUTATIVE SERINE/ARGININE-RICH SPLICING FACTOR 1B ISOFORM X2;ARGININE/SERINE-RICH SPLICING FACTOR;SRSF1	SRSF1_CHICK;SRSF1	SERINE/ARGININE-RICH SPLICING FACTOR 1, TRANSCRIPT VARIANT X1; SERINE/ARGININE-RICH SPLICING FACTOR 1, TRANSCRIPT VARIANT X2;SRSF1
2965	PORTHOMCL2965[AjBfCgCiDrGgLvMmOjOlPsSpXl|(18 genes, 13 taxa)]:	-0.403791	-0.639121	-0.517198	0.419265	-0.114926	0.187735	-0.92639	-0.847745	-0.422647	-0.795666	-0.858333	-0.692215	RCL1	RCL1	RCL1	RCL1.L;RCL1.S;RCL1	RCL1	RCL1	RNA 3'-TERMINAL PHOSPHATE CYCLASE-LIKE PROTEIN;RCL1	RCL1	RCL1_BOVIN	PUTATIVE RNA 3'-TERMINAL PHOSPHATE CYCLASE-LIKE PROTEIN;HYPOTHETICAL PROTEIN;RNA 3'-TERMINAL PHOSPHATE CYCLASE-LIKE PROTEIN;RCL1	RCL1_HUMAN;RCL1_MOUSE;RCL1	RNA 3'-TERMINAL PHOSPHATE CYCLASE-LIKE PROTEIN;RCL1
4894	PORTHOMCL4894[AjBfCgCiDrGgLvOjOlPsSpXl|(15 genes, 12 taxa)]:	-0.412473	-0.767824	0	-0.146152	-0.566029	-0.377441	-0.616844	-0.207921	-0.891382	-0.51773	-0.666544	-0.691885	RIOK2	RIOK2		RIOK2.L;RIOK2.S;RIOK2	RIO KINASE 2;RIOK2	RIOK2	SERINE/THREONINE-PROTEIN KINASE RIO2-LIKE;RIOK2	RIOK2	RIOK2_HUMAN;RIOK2	RIO KINASE 2;RIOK2	RIOK2_HUMAN;RIOK2_MOUSE;RIOK2	SERINE/THREONINE-PROTEIN KINASE RIO2;RIOK2
7847	PORTHOMCL7847[AjBfCgGgLvOjPsSpXl|(11 genes, 9 taxa)]:	0.129316	-0.0639121	0	0.114632	0	0	0	0.618252	-0.864412	-0.793767	-0.416789	-0.691656		LOC102374835		LOC108717416					VAC8_ASPFU;VAC8	PUTATIVE VACUOLAR PROTEIN 8-LIKE ISOFORM X2;PUTATIVE VACUOLAR PROTEIN 8;PUTATIVE VACUOLAR PROTEIN 8-LIKE ISOFORM X1	VAC8_PICPA;VAC8	VACUOLAR PROTEIN 8
7293	PORTHOMCL7293[AjBfCiDrLvMmOjOlPsSpXl|(12 genes, 11 taxa)]:	0	-0.604	-0.619231	0.404216	0.151765	0.720735	-0.283623	0	-0.878324	-0.7329	-0.462745	-0.691323		KIF22	KIF22	KIF22.L;KIF22.S	KIF22	KIF22	KINESIN-LIKE PROTEIN KIF18B		KIF22_RAT	PUTATIVE KINESIN-LIKE PROTEIN KIF22	KIF22_DANRE	KINESIN-LIKE PROTEIN KIF22
4921	PORTHOMCL4921[AjBfCgCiDrGgLvMmOjOlPsSpXl|(15 genes, 13 taxa)]:	0.273956	-0.0888352	-0.721264	-0.189583	0.331544	0.117706	-0.833351	-0.647343	-0.678912	-0.783075	-0.611275	-0.691087	SLC9A8	SLC9A8	SLC9A8	LOC108702590;SLC9A8	SLC9A8	SLC9A8	SODIUM/HYDROGEN EXCHANGER 8-LIKE;SLC9A8	SLC9A8	RBL1_HUMAN;RBL1	PUTATIVE SODIUM/HYDROGEN EXCHANGER 8;SLC9A8	SL9A8_CHICK;SLC9A8	SODIUM/HYDROGEN EXCHANGER 8;SLC9A8;NHEL
486	PORTHOMCL486[AjBfCgCiDrGgLvMmOjOlPsSpXl|(43 genes, 13 taxa)]:	-0.508352	-0.653767	-0.394011	0.409338	-0.265123	0.587853	0.0432078	-0.619193	-0.657559	-0.741692	-0.673897	-0.691049			UBB;UBC;UBD;ISG15	LOC108707934;LOC108707155	UBB	SI:CH211-202A12.4;UBB;UBC	POLYUBIQUITIN-A, TRANSCRIPT VARIANT X7; POLYUBIQUITIN-A, TRANSCRIPT VARIANT X2; POLYUBIQUITIN-A, TRANSCRIPT VARIANT X6; POLYUBIQUITIN-A, TRANSCRIPT VARIANT X8; POLYUBIQUITIN-A, TRANSCRIPT VARIANT X3; POLYUBIQUITIN-A, TRANSCRIPT VARIANT X4; POLYUBIQUITIN-A, TRANSCRIPT VARIANT X9; POLYUBIQUITIN-A, TRANSCRIPT VARIANT X5; POLYUBIQUITIN-A, TRANSCRIPT VARIANT X1	UBB	UBB_PONPY	POLYUBIQUITIN;HYPOTHETICAL PROTEIN;PUTATIVE UBIQUITIN C VARIANT 2;UBIQUITIN;PUTATIVE POLYUBIQUITIN-C-LIKE ISOFORM X1;PUTATIVE POLYUBIQUITIN-B ISOFORM X2;UBIQUITIN C VARIANT;POLYUBIQUTIN 4;PUTATIVE POLYUBIQUITIN-C;CHAIN F, USP21 IN COMPLEX WITH LINEAR DIUBIQUITIN-ALDEHYDE;UBIQUITIN C;PUTATIVE POLYUBIQUITIN-C ISOFORM X3	UBB_PONPY;UBI4P_NEUCR	POLYUBIQUITIN-C, TRANSCRIPT VARIANT X1; POLYUBIQUITIN-C, TRANSCRIPT VARIANT X2;UNCHARACTERIZED LOC105444320, TRANSCRIPT VARIANT X2; UNCHARACTERIZED LOC105444320, TRANSCRIPT VARIANT X1;POLYUBIQUITIN-LIKE
614	PORTHOMCL614[AjBfCgCiDrGgLvMmOjOlPsSpXl|(37 genes, 13 taxa)]:	0.02	0.703912	0.898901	-0.581985	-0.690466	-0.586029	-0.208883	0.702867	-0.771912	-0.837358	-0.463725	-0.690998	LAMC1	LAMC1;LAMC2	LAMC1;LAMC2	LAMC1.S;LAMC1.L;LAMC2.L;LAMC1;LAMC2	LAMC1;LAMININ SUBUNIT GAMMA-2	LAMC1;LAMB1B;LAMC2	LAMININ SUBUNIT GAMMA-1-LIKE;LAMC1		LAMC1_HUMAN;LAMC1	PUTATIVE LAMININ SUBUNIT ALPHA-2-LIKE;PUTATIVE LAMININ SUBUNIT GAMMA-1;PUTATIVE LAMININ SUBUNIT GAMMA-1 ISOFORM X1;PUTATIVE LAMININ SUBUNIT GAMMA-1-LIKE;HYPOTHETICAL PROTEIN;PUTATIVE LAMININ SUBUNIT BETA-1 ISOFORM X2	LAMC1_MOUSE;LAMC1	LAMININ SUBUNIT GAMMA-1;LAMININ SUBUNIT GAMMA-1, TRANSCRIPT VARIANT X2; LAMININ SUBUNIT GAMMA-1, TRANSCRIPT VARIANT X1;LAMININ SUBUNIT GAMMA-1-LIKE;LAMININ SUBUNIT GAMMA-3-LIKE;LAMC1
1515	PORTHOMCL1515[AjBfCgCiDrGgLvMmOjOlPsSpXl|(24 genes, 13 taxa)]:	-0.716154	-0.814593	-0.561374	0.392426	-0.46027	0.718471	-0.787338	0.57028	-0.656559	-0.751063	-0.663603	-0.690408	THOC1	THOC1	THOC1	THOC1.L;THOC1	THOC1	THOC1	THO COMPLEX SUBUNIT 1, TRANSCRIPT VARIANT X1; THO COMPLEX SUBUNIT 1, TRANSCRIPT VARIANT X2;THOC1	THOC1	THOC1_MOUSE;THOC1	PUTATIVE SERINE/THREONINE-PROTEIN KINASE PATS1-LIKE;PUTATIVE THO COMPLEX SUBUNIT 1;PUTATIVE THO COMPLEX SUBUNIT 1-LIKE;IMD-LIKE PROTEIN;HYPOTHETICAL PROTEIN	THOC1_HUMAN;THOC1	THO COMPLEX SUBUNIT 1;UNCHARACTERIZED LOC100891154;THO COMPLEX SUBUNIT 1-LIKE
230	PORTHOMCL230[AjBfCgCiDrGgLvMmOjOlPsSpXl|(68 genes, 13 taxa)]:	0.703352	-0.0298022	0.208077	-0.428991	0.372206	-0.407854	0.30793	-0.915624	-0.883647	-0.909329	-0.278064	-0.690347	GRIA1;GRIA2;GRIA4;GRIA3	GRIA3;GRIA4;GRIA2;GRIA1	GRIA3;GRIA1;GRIA4;GRIA2	LOC108709985;LOC108712610;LOC108699208;GRIA3.L;GRIA2.S;GRIA3.S;GRIA4;GRIA1;GRIA2;GRIA3	GRIA2;GRIA3;GRIA4B;GLUTAMATE RECEPTOR 4;GRIA3 (1 OF MANY);GRIA4	GRIA4A;GRIA2B;GRIA3A;GRIA1A;GRIA3B;GRIA2A;GRIA1B;GRIA4;GRIA3 (1 OF MANY)	GLUTAMATE RECEPTOR 2-LIKE	GRIA2	GRIA4_HUMAN;GRIA1_MACFA;GRIA3_MOUSE;GRIA2_PONAB	PUTATIVE GLUTAMATE RECEPTOR 2-LIKE;HYPOTHETICAL PROTEIN;PUTATIVE GLUTAMATE RECEPTOR 1;PUTATIVE GLUTAMATE RECEPTOR 2;PUTATIVE GLUTAMATE RECEPTOR 3;GRIK2	GRIA2_HUMAN;GRIA4_HUMAN;GRIA1_MOUSE	GLUTAMATE RECEPTOR 2-LIKE;GLUTAMATE RECEPTOR 1;GLUTAMATE RECEPTOR 2
4480	PORTHOMCL4480[AjBfCgCiDrGgLvMmOjOlPsSpXl|(15 genes, 13 taxa)]:	-0.301209	0.321582	-0.559396	-0.0771324	-0.213137	-0.464471	-0.435558	-0.401958	-0.926324	-0.649577	-0.494485	-0.690129	BYSL	BYSL	BYSL	BYSL.S;BYSL	BYSL	BYSL	BYSTIN-LIKE;BYSL	BYSL	BYST_NEMVE;BYSL	PUTATIVE BYSTIN-LIKE;BYSL	BYST_BOVIN;BYSL	BYSTIN;BYSL
2629	PORTHOMCL2629[AjBfCgCiDrGgLvMmOjOlPsSpXl|(19 genes, 13 taxa)]:	-0.702912	-0.739033	-0.787143	0.143434	0.121936	0.602618	-0.761234	0.308811	-0.812979	-0.5416	-0.714425	-0.689668	CCNJ;CCNJL	CCNJ;CCNJL	CCNJ;CCNJL	CCNJ.S;CCNJ.L;CCNJ	CCNJ;CCNJL	CCNJ;CCNJL	CYCLIN-J-LIKE;CCNJ	CCNJL	CCNJ_HUMAN	PUTATIVE CYCLIN-J	CCNJ_XENLA;CCNJL	CYCLIN-J;CCNJL
14743	PORTHOMCL14743[AjLvOjSp|(4 genes, 4 taxa)]:	0	0	0	0	0	0	0	0	-0.734	-0.78516	-0.549142	-0.689434									LYSM3_HUMAN	PUTATIVE LYSM AND PUTATIVE PEPTIDOGLYCAN-BINDING DOMAIN-CONTAINING PROTEIN 3-LIKE	LYSM3_XENTR	LYSM AND PUTATIVE PEPTIDOGLYCAN-BINDING DOMAIN-CONTAINING PROTEIN 3-LIKE, TRANSCRIPT VARIANT X1; LYSM AND PUTATIVE PEPTIDOGLYCAN-BINDING DOMAIN-CONTAINING PROTEIN 3-LIKE, TRANSCRIPT VARIANT X2
7715	PORTHOMCL7715[BfCgCiDrGgLvMmOjOlPsSpXl|(12 genes, 12 taxa)]:	-0.459945	-0.688396	-0.541593	0.431569	0.128873	-0.409882	-0.875325	0.831119	-0.630353	-0.66194	-0.775613	-0.689302	UTP23	UTP23	UTP23	UTP23.L;UTP23	UTP23	UTP23	RRNA-PROCESSING PROTEIN UTP23 HOMOLOG;UTP23	UTP23	UTP23_HUMAN;UTP23		UTP23_HUMAN;UTP23	RRNA-PROCESSING PROTEIN UTP23 HOMOLOG, TRANSCRIPT VARIANT X3; RRNA-PROCESSING PROTEIN UTP23 HOMOLOG, TRANSCRIPT VARIANT X1; RRNA-PROCESSING PROTEIN UTP23 HOMOLOG, TRANSCRIPT VARIANT X2;UTP23
4819	PORTHOMCL4819[AjBfCgCiDrGgLvMmOjOlSpXl|(15 genes, 12 taxa)]:	0.291209	0	-0.839286	0.12098	-0.10902	0.591	-0.885273	-0.116643	-0.848353	-0.830114	-0.388725	-0.689064	WDR82		WDR82	WDR82.S;WDR82	WDR82	WDR82;TWF2A	WD REPEAT-CONTAINING PROTEIN 82-LIKE		WDR82_DANRE;WDR82	PUTATIVE WD REPEAT-CONTAINING PROTEIN 82-LIKE;WDR82	WDR82_MOUSE;WDR82	WD REPEAT-CONTAINING PROTEIN 82;WDR82
92	PORTHOMCL92[AjBfCgCiDrGgLvMmOjOlPsSpXl|(107 genes, 13 taxa)]:	0.432486	-0.00639109	-0.0700549	-0.467039	0.489468	-0.363934	-0.533753	0.397972	-0.736206	-0.904355	-0.426593	-0.689051	B3GALT1	B3GALT1	B3GALT1	LOC108701359;B3GNT7.L;LOC108703687;B3GALT1.S;LOC108710164	B3GALT1A (1 OF MANY)	B3GALT1A;B3GALT1	BETA-1,3-GALACTOSYLTRANSFERASE 1-LIKE;LACTOSYLCERAMIDE 1,3-N-ACETYL-BETA-D-GLUCOSAMINYLTRANSFERASE A-LIKE;BETA-1,3-GALACTOSYLTRANSFERASE 5-LIKE;BETA-1,3-GALACTOSYLTRANSFERASE 4-LIKE;BETA-1,3-GALACTOSYLTRANSFERASE BRN-LIKE;B3GNT7;LOC101242996;LOC100180134;LOC100181500	B3GNT5;B3GALT2 (1 OF MANY);B3GALT1;B3GALT5	B3GT1_PONPY;B3GT5_PANPA;B3GALT1	HYPOTHETICAL PROTEIN;PUTATIVE BETA-1,3-GALACTOSYLTRANSFERASE 1-LIKE;PUTATIVE BETA-1,3-GALACTOSYLTRANSFERASE 5;B3GALT1	B3GT1_PONPY;B3GALT1	BETA-1,3-GALACTOSYLTRANSFERASE 1-LIKE;UNCHARACTERIZED LOC590948;UNCHARACTERIZED LOC100892581;UNCHARACTERIZED LOC105437068;UNCHARACTERIZED LOC105441590;UDP-GLCNAC:BETAGAL BETA-1,3-N-ACETYLGLUCOSAMINYLTRANSFERASE 7-LIKE;UNCHARACTERIZED LOC105441343;BETA-1,3-GALACTOSYLTRANSFERASE 5-LIKE;LACTOSYLCERAMIDE 1,3-N-ACETYL-BETA-D-GLUCOSAMINYLTRANSFERASE-LIKE
10102	PORTHOMCL10102[CiLvMmOjOlPsSpXl|(8 genes, 8 taxa)]:	0	-0.551121	-0.597747	0.0259804	-0.0346814	0	-0.844714	0	-0.653206	-0.72935	-0.683701	-0.688752		UBE4B	UBE4B	UBE4B.L;UBE4B	UBE4B		UBIQUITIN CONJUGATION FACTOR E4 B, TRANSCRIPT VARIANT X1; UBIQUITIN CONJUGATION FACTOR E4 B, TRANSCRIPT VARIANT X2;UBE4B		UBE4B_MOUSE;UBE4B		UBE4B_MOUSE	UBIQUITIN CONJUGATION FACTOR E4 B
4460	PORTHOMCL4460[AjBfCgCiDrLvMmOjOlSpXl|(15 genes, 11 taxa)]:	0	0	-0.442637	-0.806642	0.292304	-0.827374	-0.858325	0.336573	-0.877735	-0.502477	-0.686029	-0.688747			OXA1L	OXA1L.L;OXA1L.S;OXA1L	OXA1L	OXA1L	MITOCHONDRIAL INNER MEMBRANE PROTEIN OXA1L;MITOCHONDRIAL INNER MEMBRANE PROTEIN OXA1L-LIKE	OXA1L	OXA1L_MOUSE	PUTATIVE MITOCHONDRIAL INNER MEMBRANE PROTEIN OXA1L;OXA1L	OXA1L_MOUSE;OXA1L	MITOCHONDRIAL INNER MEMBRANE PROTEIN OXA1L;OXA1L
3724	PORTHOMCL3724[AjBfCgCiDrGgLvMmOjOlPsSpXl|(16 genes, 13 taxa)]:	0.0268681	-0.63433	-0.861099	0.415686	0.0758088	0.433235	-0.810558	-0.261259	-0.555441	-0.844727	-0.665972	-0.688713	CEP120	CEP120	CEP120	CEP120.L;CEP120	CEP120	CEP120	CENTROSOMAL PROTEIN OF 120 KDA;CEP120	CEP120	CE120_BOVIN	PUTATIVE CENTROSOMAL PROTEIN;CEP120	CE120_BOVIN;CEP120	CENTROSOMAL PROTEIN OF 120 KDA;CENTROSOMAL PROTEIN OF 120 KDA, TRANSCRIPT VARIANT X1; CENTROSOMAL PROTEIN OF 120 KDA, TRANSCRIPT VARIANT X4; CENTROSOMAL PROTEIN OF 120 KDA, TRANSCRIPT VARIANT X3; CENTROSOMAL PROTEIN OF 120 KDA, TRANSCRIPT VARIANT X2;CEP120
5473	PORTHOMCL5473[AjBfCgCiDrGgLvMmOjOlSpXl|(14 genes, 12 taxa)]:	-0.598516	0	-0.0936264	-0.640956	-0.848333	0.158412	-0.690429	0.858322	-0.762529	-0.846873	-0.45625	-0.688551	UROD		UROD	UROD.L;UROD	UROD	UROD	UROPORPHYRINOGEN DECARBOXYLASE;UROD	UROD	DCUP_SHEEP;UROD	PUTATIVE UROPORPHYRINOGEN DECARBOXYLASE;UROD	DCUP_DANRE	UROPORPHYRINOGEN DECARBOXYLASE;UROD
15042	PORTHOMCL15042[AjLvOjSp|(4 genes, 4 taxa)]:	0	0	0	0	0	0	0	0	-0.749059	-0.773251	-0.542034	-0.688115										HYPOTHETICAL PROTEIN		UNCHARACTERIZED LOC100890428
562	PORTHOMCL562[AjBfCgCiDrGgLvMmOjOlPsSpXl|(40 genes, 13 taxa)]:	-0.337802	-0.572396	-0.802308	0.405098	-0.518922	0.322794	-0.829416	0.490559	-0.823618	-0.752528	-0.487868	-0.688005	AXIN1;CEP112;AXIN2	AXIN1;AXIN2;CEP112	CEP112;AXIN2	LOC108701206;AXIN1.L;XARP-LIKE.S;XARP.L;AXIN1.S;CEP112;AXIN1	CEP112;AXIN1;AXIN2	CEP112;AXIN1;AXIN2	CENTROSOMAL PROTEIN OF 112 KDA-LIKE;AXIN PROTEIN;CEP112		CE112_HUMAN	PUTATIVE AXIN-1;PUTATIVE CENTROSOMAL PROTEIN;CEP112	CE112_HUMAN	CENTROSOMAL PROTEIN OF 112 KDA;AXIN-1, TRANSCRIPT VARIANT X4; AXIN-1, TRANSCRIPT VARIANT X3; AXIN-1, TRANSCRIPT VARIANT X1; AXIN-1, TRANSCRIPT VARIANT X2
4706	PORTHOMCL4706[AjBfCgCiDrGgLvMmOjOlPsSpXl|(15 genes, 13 taxa)]:	-0.49978	-0.874901	-0.52989	0.419779	-0.625735	0.258235	-0.776584	0.0933463	-0.893676	-0.857977	-0.311642	-0.687765	ASH2L	ASH2L	ASH2L	ASH2L.S;ASH2L.L;ASH2L	ASH2L	ASH2L	ASH2-LIKE PROTEIN;ASH2L	ASH2L	ASH2L_MOUSE;ASH2L	PUTATIVE SET1/ASH2 HISTONE METHYLTRANSFERASE COMPLEX SUBUNIT ASH2-LIKE;ASH2L	ASH2L_MOUSE	SET1/ASH2 HISTONE METHYLTRANSFERASE COMPLEX SUBUNIT ASH2-LIKE;ASH2L
3237	PORTHOMCL3237[AjBfCgCiDrGgLvMmOjOlPsSpXl|(17 genes, 13 taxa)]:	0.319341	-0.696791	-0.907033	-0.00515486	0.622892	0.136088	-0.753519	0.0246824	-0.846	-0.768813	-0.447917	-0.687577	RNF144A	RNF144A	RNF144A	RNF144A.L;RNF144A.S;RNF144A	RNF144AA;RNF144A	RNF144AA;RNF144AB;RNF144A	PROBABLE E3 UBIQUITIN-PROTEIN LIGASE RNF144A, TRANSCRIPT VARIANT X2; PROBABLE E3 UBIQUITIN-PROTEIN LIGASE RNF144A, TRANSCRIPT VARIANT X1;RNF144B	RNF144A	R1441_DANRE;SMAP2_CHICK	HYPOTHETICAL PROTEIN	R1441_DANRE	PROBABLE E3 UBIQUITIN-PROTEIN LIGASE RNF144A-A
5411	PORTHOMCL5411[AjBfCgCiDrGgLvMmOjOlPsSpXl|(14 genes, 13 taxa)]:	-0.464011	-0.739912	-0.525824	0.238333	-0.506593	-0.192206	-0.79826	-0.68047	-0.833	-0.77711	-0.451961	-0.687357	CMSS1	CMSS1	CMSS1	CMSS1.L;CMSS1	CMSS1	CMSS1	PROTEIN CMSS1-LIKE	CMSS1	CMS1_XENLA	HYPOTHETICAL PROTEIN;CMSS1	CC026_BOVIN;CMSS1	UNCHARACTERIZED PROTEIN C3ORF26 HOMOLOG;CMSS1
5915	PORTHOMCL5915[AjBfCgCiDrGgLvMmOjOlPsSpXl|(14 genes, 13 taxa)]:	-0.70989	-0.977099	-0.639725	0.0851471	-0.453382	-0.006	-0.864532	0.487203	-0.757299	-0.851909	-0.452328	-0.687179	CHAF1B	CHAF1B	CHAF1B	CHAF1B.L;CHAF1B	CHAF1B	CHAF1B	CHROMATIN ASSEMBLY FACTOR 1 SUBUNIT B-LIKE, TRANSCRIPT VARIANT X1; CHROMATIN ASSEMBLY FACTOR 1 SUBUNIT B-LIKE, TRANSCRIPT VARIANT X2;CHAF1B		CAF1B_MOUSE	PUTATIVE CHROMATIN ASSEMBLY FACTOR 1 SUBUNIT B-LIKE	CAF1B_MOUSE	PROTEIN HIR1;CHROMATIN ASSEMBLY FACTOR 1 SUBUNIT B
2599	PORTHOMCL2599[AjBfCgCiDrGgLvMmOjOlPsSpXl|(19 genes, 13 taxa)]:	-0.316209	-0.879033	-0.570824	-0.00419118	0.0721814	0.465235	-0.916766	0.0695804	-0.678647	-0.764788	-0.616667	-0.686701	RANBP3	RANBP3	RANBP3	RANBP3.L;RANBP3.S;RANBP3	RANBP3	RANBP3A;RANBP3B;RANBP3	RAN-BINDING PROTEIN 3		ANR44_CHICK;RANB3_PONAB	PUTATIVE ANKYRIN-3;PUTATIVE RAN-BINDING PROTEIN 3	RANB3_PONAB	RAN-BINDING PROTEIN 3;ANKYRIN-3;RANBP3
5614	PORTHOMCL5614[AjBfCgDrGgLvMmOjOlPsSpXl|(14 genes, 12 taxa)]:	-0.511978	-0.643516	-0.547582	-0.867083	-0.907255	0.417618	0	0.29951	-0.752588	-0.673849	-0.633578	-0.686672	DTYMK	DTYMK	DTYMK	DTYMK.S	DTYMK	DTYMK			KTHY_HUMAN	PUTATIVE THYMIDYLATE KINASE;DTYMK	KTHY_HUMAN;DTYMK	THYMIDYLATE KINASE;DTYMK
929	PORTHOMCL929[AjBfCgCiDrGgLvMmOjOlPsSpXl|(30 genes, 13 taxa)]:	-0.326154	0.672923	0.57478	-0.773064	0.545025	-0.176676	-0.628571	-0.683427	-0.513588	-0.894262	-0.651103	-0.686318	ACAD9	ACADVL;ACAD9	ACADVL;ACAD9	ACADVL.L;ACAD9.S;ACADVL;ACAD9	ACADVL;ACAD9	ACADVL;ACAD9	VERY LONG-CHAIN SPECIFIC ACYL-COA DEHYDROGENASE, MITOCHONDRIAL-LIKE;ACYL-COA DEHYDROGENASE FAMILY MEMBER 9, MITOCHONDRIAL-LIKE, TRANSCRIPT VARIANT X2; ACYL-COA DEHYDROGENASE FAMILY MEMBER 9, MITOCHONDRIAL-LIKE, TRANSCRIPT VARIANT X1;ACADVL;ACAD9		ACADV_BOVIN;ACAD9_HUMAN;ACADV_RAT;ACADV_MOUSE;ACAD9	PUTATIVE VERY LONG-CHAIN SPECIFIC ACYL-COA DEHYDROGENASE, MITOCHONDRIAL;PUTATIVE ACYL-COA DEHYDROGENASE FAMILY MEMBER 9, MITOCHONDRIAL;ACAD9;ACADVL	ACADV_MOUSE;ACAD9_HUMAN;ACADVL	VERY LONG-CHAIN SPECIFIC ACYL-COA DEHYDROGENASE, MITOCHONDRIAL;ACYL-COA DEHYDROGENASE FAMILY MEMBER 9, MITOCHONDRIAL;ACADVL;ACAD9
6109	PORTHOMCL6109[AjBfCiDrGgLvMmOjPsSpXl|(13 genes, 11 taxa)]:	-0.057033	0.701407	0.461154	0.256127	0	-0.131353	-0.426623	0.195734	-0.831853	-0.743447	-0.482843	-0.686048	SLC39A11	SLC39A11	SLC39A11	SLC39A11.L;SLC39A11		CABZ01100870.1;SLC39A11	ZINC TRANSPORTER ZIP11-LIKE;SLC39A11	SLC39A11	S39AB_BOVIN;SLC39A11	PUTATIVE ZINC TRANSPORTER ZIP11 ISOFORM X2;PUTATIVE ZINC TRANSPORTER ZIP11 ISOFORM 2;SLC39A11	S39AB_BOVIN;SLC39A11	ZINC TRANSPORTER ZIP11, TRANSCRIPT VARIANT X2; ZINC TRANSPORTER ZIP11, TRANSCRIPT VARIANT X1;ZINC TRANSPORTER ZIP11;SLC39A11
2590	PORTHOMCL2590[AjBfCgCiDrGgLvMmOjOlPsSpXl|(19 genes, 13 taxa)]:	-0.551374	-0.841934	-0.631374	0.311667	-0.25576	-0.141824	-0.795532	0.596244	-0.908794	-0.675253	-0.472059	-0.685369	TOP1	TOP1	TOP1	TOP1.2.S;TOP1MT-LIKE.L;TOP1	TOP1L;TOP1	TOP1L;TOP1MT	DNA TOPOISOMERASE I, MITOCHONDRIAL-LIKE;TOP1		TOP1_CHLAE	PUTATIVE DNA TOPOISOMERASE 1;TOP1	TOP1_CHLAE	DNA TOPOISOMERASE 1
8842	PORTHOMCL8842[AjGgLvMmOjPsSpXl|(10 genes, 8 taxa)]:	-0.72	-0.499077	-0.534121	-0.160907	0	0	0	0	-0.829471	-0.783179	-0.442892	-0.68518	SALL1	SALL1;SALL4	SALL3	SALL1.L;SALL1					SALL3_HUMAN;SALL3	PUTATIVE SAL-LIKE PROTEIN 4 ISOFORM X2;PUTATIVE SPALT-LIKE TRANSCRIPTION FACTOR ISOFORM X1	SALL1_HUMAN	SAL-LIKE PROTEIN 3, TRANSCRIPT VARIANT X2; SAL-LIKE PROTEIN 3, TRANSCRIPT VARIANT X1
4795	PORTHOMCL4795[AjCgDrGgLvMmOjOlPsSpXl|(15 genes, 11 taxa)]:	-0.313242	-0.486462	-0.845769	0.42299	-0.690343	-0.274278	0	0	-0.869647	-0.713251	-0.472549	-0.685149	SOX2	SOX3	SOX2;SOX3	SOX3.L	SOX2;SOX3	SOX2;SOX3			SOX3_DANRE;SOX2	SOXB1	SOX2_CHICK;SOX2	TRANSCRIPTION FACTOR SOXB1;SOX2
10903	PORTHOMCL10903[AjBfCgCiLvOjSp|(7 genes, 7 taxa)]:	0	0	0	0	0	0	-0.891455	-0.344196	-0.863118	-0.763901	-0.428309	-0.685109							UNCHARACTERIZED LOC100187022, TRANSCRIPT VARIANT X1; UNCHARACTERIZED LOC100187022, TRANSCRIPT VARIANT X2; UNCHARACTERIZED LOC100187022, TRANSCRIPT VARIANT X3; UNCHARACTERIZED LOC100187022, TRANSCRIPT VARIANT X5; UNCHARACTERIZED LOC100187022, TRANSCRIPT VARIANT X6; UNCHARACTERIZED LOC100187022, TRANSCRIPT VARIANT X4		HAUS4_HUMAN	PUTATIVE HAUS AUGMIN-LIKE COMPLEX SUBUNIT 4	HAUS4_MOUSE	HAUS AUGMIN-LIKE COMPLEX SUBUNIT 4
2380	PORTHOMCL2380[AjBfCgCiDrGgLvMmOjOlPsSpXl|(20 genes, 13 taxa)]:	-0.477967	0.361187	-0.542418	-0.0518873	0.156225	-0.165735	-0.785792	0.0207692	-0.501882	-0.889742	-0.663603	-0.685076	DDX21	DDX21	DDX50;DDX21	LOC398189;DDX21.L;DDX21	DDX21	DDX21	NUCLEOLAR RNA HELICASE 2;DDX21	DDX21	DDX27_HUMAN;DDX27	PUTATIVE NUCLEOLAR RNA HELICASE 2-LIKE ISOFORM X2;PUTATIVE NUCLEOLAR RNA HELICASE 2-LIKE;PUTATIVE NUCLEOLAR RNA HELICASE 2;DDX50	DDX50_HUMAN;DDX21_HUMAN	NUCLEOLAR RNA HELICASE 2;DDX21
6744	PORTHOMCL6744[AjBfCgDrGgLvMmOjOlPsSpXl|(13 genes, 12 taxa)]:	0.550879	-0.724967	-0.392912	-0.715882	0.148015	-0.419559	0	-0.204126	-0.738352	-0.751868	-0.564906	-0.685042	POLG2	POLG2	POLG2	POLG2.L;POLG2	POLG2	POLG2				PUTATIVE DNA POLYMERASE SUBUNIT GAMMA-2, MITOCHONDRIAL-LIKE	DPOG2_XENLA	DNA POLYMERASE SUBUNIT GAMMA-2, MITOCHONDRIAL-LIKE, TRANSCRIPT VARIANT X1; DNA POLYMERASE SUBUNIT GAMMA-2, MITOCHONDRIAL-LIKE, TRANSCRIPT VARIANT X2
2680	PORTHOMCL2680[AjBfCgCiDrGgLvMmOjOlPsSpXl|(19 genes, 13 taxa)]:	-0.517802	-0.0443516	-0.391154	0.0932108	0.121397	-0.233	-0.420558	-0.115175	-0.634029	-0.812239	-0.608824	-0.685031	BTBD10;KCTD20	BTBD10;KCTD20	BTBD10;KCTD20	BTBD10.S;BTBD10.L;BTBD10	BTBD10B;BTB/POZ DOMAIN-CONTAINING PROTEIN 10;BTBD10	BTBD10A;BTBD10B;BTBD10	BTB/POZ DOMAIN-CONTAINING PROTEIN 10	BTBD10	BTBDA_MOUSE;BTBD10	PUTATIVE BTB/POZ DOMAIN-CONTAINING PROTEIN KCTD20 ISOFORM X1	KCD20_HUMAN;BTBD10A	BTB/POZ DOMAIN-CONTAINING PROTEIN KCTD20, TRANSCRIPT VARIANT X2; BTB/POZ DOMAIN-CONTAINING PROTEIN KCTD20, TRANSCRIPT VARIANT X1
1572	PORTHOMCL1572[AjBfCgCiDrGgLvMmOjOlPsSpXl|(24 genes, 13 taxa)]:	-0.406593	-0.532	0.0926923	-0.646176	-0.0910294	0.0374118	-0.71139	-0.175455	-0.639235	-0.748111	-0.667647	-0.684998	SEC31A;SEC31B	RBBP7;SEC31A	SEC31A;SEC31B	SEC31B.S;SEC31A.L;SEC31B.L;SEC31B;SEC31A	SEC31B;SEC31A	SEC31A;SEC31B	PROTEIN TRANSPORT PROTEIN SEC31A;SEC31B		SC31A_MOUSE	HYPOTHETICAL PROTEIN	SC31A_PONAB	PROTEIN TRANSPORT PROTEIN SEC31A
3330	PORTHOMCL3330[AjBfCgCiDrGgLvMmOjOlPsSpXl|(17 genes, 13 taxa)]:	-0.0158242	-0.482286	-0.183132	-0.510417	-0.75076	-0.848059	-0.859532	-0.329161	-0.836824	-0.41614	-0.801961	-0.684975	UFL1	UFL1	UFL1	UFL1.L;UFL1	UFL1	UFL1	E3 UFM1-PROTEIN LIGASE 1;UFL1	UFL1	UFL1_MACFA;UFL1	PUTATIVE E3 UFM1-PROTEIN LIGASE 1;PUTATIVE E3 UFM1-PROTEIN LIGASE 1-LIKE;UFL1	UFL1_CHICK;UFL1	E3 UFM1-PROTEIN LIGASE 1;UFL1
1438	PORTHOMCL1438[AjBfCgCiDrGgLvMmOjOlPsSpXl|(25 genes, 13 taxa)]:	-0.374505	-0.652659	-0.646978	-0.151985	-0.432549	0.155882	-0.713039	-0.882312	-0.815029	-0.751496	-0.48652	-0.684348	SMCHD1	SMCHD1	SMCHD1	SMCHD1.L;SMCHD1	SMCHD1	SMCHD1	STRUCTURAL MAINTENANCE OF CHROMOSOMES FLEXIBLE HINGE DOMAIN-CONTAINING PROTEIN 1-LIKE, TRANSCRIPT VARIANT X2; STRUCTURAL MAINTENANCE OF CHROMOSOMES FLEXIBLE HINGE DOMAIN-CONTAINING PROTEIN 1-LIKE, TRANSCRIPT VARIANT X1; STRUCTURAL MAINTENANCE OF CHROMOSOMES FLEXIBLE HINGE DOMAIN-CONTAINING PROTEIN 1-LIKE, TRANSCRIPT VARIANT X3;STRUCTURAL MAINTENANCE OF CHROMOSOMES FLEXIBLE HINGE DOMAIN-CONTAINING…	SMCHD1	SMHD1_MOUSE	PUTATIVE STRUCTURAL MAINTENANCE OF CHROMOSOMES FLEXIBLE HINGE DOMAIN-CONTAINING PROTEIN 1	SMHD1_MOUSE;SMCHD1	STRUCTURAL MAINTENANCE OF CHROMOSOMES FLEXIBLE HINGE DOMAIN-CONTAINING PROTEIN 1;STRUCTURAL MAINTENANCE OF CHROMOSOMES FLEXIBLE HINGE DOMAIN-CONTAINING PROTEIN 1-LIKE
3245	PORTHOMCL3245[AjBfCgCiDrGgLvMmOjOlPsSpXl|(17 genes, 13 taxa)]:	-0.636484	-0.848703	-0.640495	-0.838505	-0.628456	-0.529853	-0.78961	-0.856432	-0.681676	-0.778019	-0.593137	-0.684277	ZW10	ZW10	ZW10	ZW10.S;ZW10.L;ZW10	ZW10	ZW10	CENTROMERE/KINETOCHORE PROTEIN ZW10 HOMOLOG	ZW10	ZW10_HUMAN;ZW10	HYPOTHETICAL PROTEIN;PUTATIVE CENTROMERE/KINETOCHORE PROTEIN ZW10-LIKE	ZW10_PONAB;ZW10_HUMAN	CENTROMERE/KINETOCHORE PROTEIN ZW10 HOMOLOG;ZW10
4858	PORTHOMCL4858[AjBfCgCiDrGgLvMmOjOlPsSpXl|(15 genes, 13 taxa)]:	-0.208022	-0.152527	-0.548242	0.244804	-0.554363	0.768353	-0.854039	0.141189	-0.699912	-0.693891	-0.658701	-0.684168	SRPRB	SRPRB	SRPRB	SRPRB.S;SRPRB.L;SRPRB	SRPRB	SRPRB	SIGNAL RECOGNITION PARTICLE RECEPTOR SUBUNIT BETA, TRANSCRIPT VARIANT X1; SIGNAL RECOGNITION PARTICLE RECEPTOR SUBUNIT BETA, TRANSCRIPT VARIANT X2;SRPRB	SRPRB	SRPRB_MOUSE	SIGNAL RECOGNITION PARTICLE RECEPTOR SUBUNIT BETA	SRPRB_RAT	SIGNAL RECOGNITION PARTICLE RECEPTOR SUBUNIT BETA, TRANSCRIPT VARIANT X2; SIGNAL RECOGNITION PARTICLE RECEPTOR SUBUNIT BETA, TRANSCRIPT VARIANT X1;SIGNAL RECOGNITION PARTICLE RECEPTOR SUBUNIT BETA-LIKE
2960	PORTHOMCL2960[AjBfCiDrGgLvMmOjOlSpXl|(18 genes, 11 taxa)]:	0.221978	0	-0.716813	-0.302451	-0.586103	0.669765	-0.896571	0.848112	-0.746794	-0.763013	-0.541544	-0.683784	UBTF		UBTF;UBTFL1	UBTF.L;UBTF.S;UBTF	UBTFL;UBTF;NUCLEOLAR TRANSCRIPTION FACTOR 1	UBTFL;UBTF	TRANSCRIPTION FACTOR PROTEIN, TRANSCRIPT VARIANT X5; TRANSCRIPTION FACTOR PROTEIN; TRANSCRIPTION FACTOR PROTEIN, TRANSCRIPT VARIANT X6; TRANSCRIPTION FACTOR PROTEIN, TRANSCRIPT VARIANT X4; TRANSCRIPTION FACTOR PROTEIN, TRANSCRIPT VARIANT X3; TRANSCRIPTION FACTOR PROTEIN, TRANSCRIPT VARIANT X2; TRANSCRIPTION FACTOR PROTEIN, TRANSCRIPT VARIANT X7; TRANSCRIPTION FACTOR PROTEIN, TRANSCRIPT VARIANT X1		UBF1_HUMAN	PUTATIVE NUCLEOLAR TRANSCRIPTION FACTOR 1-A ISOFORM X4;PUTATIVE NUCLEOLAR TRANSCRIPTION FACTOR 1-A ISOFORM X3	UBF1B_XENLA	NUCLEOLAR TRANSCRIPTION FACTOR 1-A, TRANSCRIPT VARIANT X4; NUCLEOLAR TRANSCRIPTION FACTOR 1-A, TRANSCRIPT VARIANT X2; NUCLEOLAR TRANSCRIPTION FACTOR 1-A, TRANSCRIPT VARIANT X3; NUCLEOLAR TRANSCRIPTION FACTOR 1-A, TRANSCRIPT VARIANT X1
16044	PORTHOMCL16044[LvOjSp|(4 genes, 3 taxa)]:	0	0	0	0	0	0	0	0	-0.842206	-0.577585	-0.630882	-0.683558									NOL12_HUMAN		NOL12_XENTR	PROTHYMOSIN ALPHA-B;NUCLEOLAR PROTEIN 12
3509	PORTHOMCL3509[AjBfCgCiDrGgLvMmOjOlPsSpXl|(17 genes, 13 taxa)]:	0.515385	-0.0353846	-0.0512088	-0.142623	0.287966	0.472176	-0.557208	-0.485848	-0.668324	-0.828297	-0.553676	-0.683432	WDR47	WDR47	WDR47	WDR47.L;WDR47.S;WDR47	WDR47;WD REPEAT-CONTAINING PROTEIN 47	WDR47A;WDR47B;WDR47	WD REPEAT-CONTAINING PROTEIN 47-LIKE	WDR47	WDR47_MOUSE;WDR47	HYPOTHETICAL PROTEIN;PUTATIVE WD REPEAT-CONTAINING PROTEIN 47-LIKE;WDR47	WDR47_HUMAN	WD REPEAT-CONTAINING PROTEIN 47
3876	PORTHOMCL3876[AjBfCgDrGgLvMmOjOlPsSpXl|(16 genes, 12 taxa)]:	-0.777363	-0.590945	-0.559396	0.301863	0.077549	-0.0695882	0	0.111259	-0.584235	-0.732962	-0.732721	-0.683306		HAUS3	HAUS3	HAUS3.L;HAUS3	HAUS3	HAUS3			HAUS3_HUMAN	PUTATIVE HAUS AUGMIN-LIKE COMPLEX SUBUNIT 3	HAUS3_HUMAN	HAUS AUGMIN-LIKE COMPLEX SUBUNIT 3;HAUS AUGMIN-LIKE COMPLEX SUBUNIT 3, TRANSCRIPT VARIANT X2; HAUS AUGMIN-LIKE COMPLEX SUBUNIT 3, TRANSCRIPT VARIANT X1
3182	PORTHOMCL3182[AjBfCgCiDrGgLvMmOjOlPsSpXl|(17 genes, 13 taxa)]:	0.026044	-0.57156	-0.152033	0.38875	-0.31875	0.289471	-0.910156	0.113287	-0.878059	-0.748421	-0.423284	-0.683255	CLP1	CLP1	CLP1	CLP1.L	CLP1	CLP1	POLYRIBONUCLEOTIDE 5'-HYDROXYL-KINASE CLP1;CLP1	CLP1	CLP1_CHICK;CLP1	PUTATIVE POLYRIBONUCLEOTIDE 5'-HYDROXYL-KINASE CLP1-LIKE;PUTATIVE POLYRIBONUCLEOTIDE 5'-HYDROXYL-KINASE CLP1;HYPOTHETICAL PROTEIN;CLP1	CLP1_CHICK;CLP1	POLYRIBONUCLEOTIDE 5'-HYDROXYL-KINASE CLP1;CLP1
6382	PORTHOMCL6382[AjBfCgCiDrGgLvMmOjOlPsSpXl|(13 genes, 13 taxa)]:	-0.528791	-0.521363	-0.606923	-0.343211	0.302843	0.282971	-0.935922	0.687622	-0.615676	-0.712425	-0.721324	-0.683142	TWISTNB	TWISTNB	TWISTNB	TWISTNB.L;TWISTNB	TWISTNB	TWISTNB	DNA LIGASE 1	TWISTNB		PUTATIVE DNA-DIRECTED RNA POLYMERASE I SUBUNIT RPA43-LIKE	RPA43_HUMAN	DNA-DIRECTED RNA POLYMERASE I SUBUNIT RPA43-LIKE
4490	PORTHOMCL4490[AjBfCgCiDrGgLvMmOjOlPsSpXl|(15 genes, 13 taxa)]:	-0.265604	-0.621363	-0.549451	-0.199093	-0.486422	0.158235	-0.859688	0.551918	-0.709471	-0.618266	-0.720833	-0.682857	DDX31	DDX31	DDX31	LOC108702873;DDX18.L;DDX18	DDX31	DDX31	PROBABLE ATP-DEPENDENT RNA HELICASE DDX31;DDX31		DDX31_HUMAN;DDX31	PUTATIVE ATP-DEPENDENT RNA HELICASE DDX31;DDX31	DDX31_MOUSE;DDX31	PROBABLE ATP-DEPENDENT RNA HELICASE DDX31
1784	PORTHOMCL1784[AjBfCiDrGgLvMmOjOlPsSpXl|(22 genes, 12 taxa)]:	0.428242	-0.354901	-0.772253	0.410907	0.427206	0.759412	-0.881351	0.142308	-0.842059	-0.750485	-0.456005	-0.68285	ZDHHC15	ZDHHC2;ZDHHC15	ZDHHC15;ZDHHC20	ZDHHC2.L;ZDHHC2.S;ZDHHC20.L;ZDHHC2;ZDHHC20	ZDHHC2;ZDHHC15B;PROBABLE PALMITOYLTRANSFERASE ZDHHC20;ZDHHC15	ZDHHC2;ZDHHC15B;ZDHHC15A;ZDHHC15;ZDHHC20	ZINC FINGER PROTEIN, TRANSCRIPT VARIANT X1; ZINC FINGER PROTEIN		ZDHC2_MOUSE	PUTATIVE PALMITOYLTRANSFERASE ZDHHC2 ISOFORM X2	ZDHC2_RAT	PALMITOYLTRANSFERASE ZDHHC2, TRANSCRIPT VARIANT X1; PALMITOYLTRANSFERASE ZDHHC2, TRANSCRIPT VARIANT X3; PALMITOYLTRANSFERASE ZDHHC2, TRANSCRIPT VARIANT X2; PALMITOYLTRANSFERASE ZDHHC2, TRANSCRIPT VARIANT X4; PALMITOYLTRANSFERASE ZDHHC2, TRANSCRIPT VARIANT X5
5928	PORTHOMCL5928[AjCgCiDrGgLvMmOjOlPsSpXl|(14 genes, 12 taxa)]:	-0.0374725	-0.68189	-0.635659	0.327721	-0.591275	0.319647	-0.78887	0	-0.728059	-0.804603	-0.515319	-0.68266	MRGBP	MRGBP	MRGBP	MRGBP.L	MRGBP	MRGBP	MRG/MORF4L-BINDING PROTEIN-LIKE		MRGBP_HUMAN;MRGBP	PUTATIVE MRG/MORF4L-BINDING PROTEIN ISOFORM X1;PUTATIVE MRG/MORF4L-BINDING PROTEIN	MRGBP_MOUSE;MRGBP	MRG/MORF4L-BINDING PROTEIN, TRANSCRIPT VARIANT X1; MRG/MORF4L-BINDING PROTEIN, TRANSCRIPT VARIANT X2;MRGBP
6395	PORTHOMCL6395[AjBfCgCiDrLvMmOjOlSpXl|(13 genes, 11 taxa)]:	0	0	-0.570714	-0.12049	-0.847353	-0.0530588	-0.881221	0.864685	-0.892559	-0.532652	-0.621936	-0.682382			APEX1	APEX1.L;LOC108707047;APEX1	APEX1	APEX1	DNA-(APURINIC OR APYRIMIDINIC SITE) LYASE-LIKE;APEX1	APEX1	APEX1_DANRE;APEX1	PUTATIVE DNA-(APURINIC OR APYRIMIDINIC SITE) LYASE ISOFORM X1;PUTATIVE DNA-(APURINIC OR APYRIMIDINIC SITE) LYASE ISOFORM X2;APEX1	APEX1_DANRE;APEX1	DNA-(APURINIC OR APYRIMIDINIC SITE) LYASE, TRANSCRIPT VARIANT X2; DNA-(APURINIC OR APYRIMIDINIC SITE) LYASE, TRANSCRIPT VARIANT X1;XTH
4213	PORTHOMCL4213[AjCgCiDrGgLvMmOjOlPsSpXl|(16 genes, 12 taxa)]:	0.447033	-0.0738022	0.303791	-0.485735	-0.0551716	0.286636	-0.566545	0	-0.633235	-0.807038	-0.606618	-0.682297	SMARCA2	SMARCA2	SMARCA2	LOC432089	SMARCA2;SMARCA4A;SI:DKEY-226M8.10;SMARCA4	SMARCA2;SI:DKEY-226M8.10	TRANSCRIPTION ACTIVATOR BRG1		SMCA4_HUMAN	PUTATIVE TRANSCRIPTION ACTIVATOR BRG1	SMCA4_HUMAN	TRANSCRIPTION ACTIVATOR BRG1
4005	PORTHOMCL4005[AjBfCiDrGgLvMmOjOlPsSpXl|(16 genes, 12 taxa)]:	-0.761758	-0.810154	-0.681703	-0.254608	-0.0293873	0.713824	-0.794948	0.771049	-0.797118	-0.662002	-0.586397	-0.681839	CBX1	CBX1	CBX1	CBX1.L;CBX1.S;CBX1	CHROMOBOX PROTEIN HOMOLOG 1;CBX1B;CBX1	CBX1A;CBX1B;CBX1	CHROMOBOX PROTEIN HOMOLOG 1-LIKE		CBX5_HUMAN	HETEROCHROMATIN-ASSOCIATED PROTEIN;PUTATIVE CHROMOBOX PROTEIN-LIKE 1;CBX1	CBX3_PONAB;CBX1	CHROMOBOX PROTEIN HOMOLOG 1
3004	PORTHOMCL3004[AjBfCgCiDrGgLvMmOjOlPsSpXl|(18 genes, 13 taxa)]:	-0.178681	-0.916879	-0.802802	0.335882	0.0154657	0.123941	-0.905558	-0.70076	-0.666588	-0.820541	-0.55723	-0.681453	UHMK1	UHMK1;TTK	UHMK1	LOC108704169	UHMK1	UHMK1;TTK;LOC106605052	DUAL SPECIFICITY PROTEIN KINASE TTK-LIKE;LOC100176899	DYRK2	DYRK2_CHICK;TTK_DANRE;DYRK2	PUTATIVE SERINE/THREONINE-PROTEIN KINASE KIST-LIKE	TTK_DANRE;UHMK1_RAT	CYCLIN-DEPENDENT KINASE 13;DUAL SPECIFICITY PROTEIN KINASE TTK
2789	PORTHOMCL2789[AjBfCgCiDrGgLvMmOjOlPsSpXl|(18 genes, 13 taxa)]:	-0.546978	-0.651473	-0.569835	0.342132	-0.274436	-0.151529	-0.903584	-0.838531	-0.858294	-0.472074	-0.713358	-0.681242	PARP1	PARP1	PARP2	PARP2.S;PARP2.L;PARP2	PARP2	PARP2	POLY [ADP-RIBOSE] POLYMERASE 2-LIKE	PARP2	PARP2_MOUSE	PUTATIVE POLY;PARP1	PARP2_MOUSE;PARP2	POLY [ADP-RIBOSE] POLYMERASE 2
5415	PORTHOMCL5415[AjBfCgDrGgLvMmOjOlPsSpXl|(14 genes, 12 taxa)]:	0.43044	0.0805714	-0.134451	-0.37174	-0.101054	-0.109	0	-0.874045	-0.895941	-0.679112	-0.46826	-0.681104	GOLGA3	GOLGA3	GOLGA3	GOLGA3.S;GOLGA3	GOLGA3	GOLGA3			GOGA3_MOUSE	PUTATIVE GOLGIN SUBFAMILY A MEMBER 3-LIKE;PUTATIVE GOLGIN SUBFAMILY A MEMBER 3	GOGA3_MOUSE	GOLGIN SUBFAMILY A MEMBER 3-LIKE;GOLGIN SUBFAMILY A MEMBER 3
4621	PORTHOMCL4621[AjBfCgCiDrGgLvMmOjOlPsSpXl|(15 genes, 13 taxa)]:	-0.665659	-0.808967	-0.662527	0.357377	-0.76527	0.240735	-0.729156	0.183568	-0.822	-0.644814	-0.575858	-0.680891	CEP83	CCDC41;CEP83	CEP83	CEP83.L;CEP83	CEP83	CEP83	CENTROSOMAL PROTEIN OF 83 KDA	CEP83	CEP83_DANRE;CEP83	PUTATIVE CENTROSOMAL PROTEIN;HYPOTHETICAL PROTEIN	CEP83_MOUSE	CENTROSOMAL PROTEIN OF 83 KDA
8070	PORTHOMCL8070[AjBfCiDrLvMmOjOlPsSpXl|(11 genes, 11 taxa)]:	0	-0.755648	-0.756923	-0.27553	-0.298417	0.0285193	-0.413779	0.0439161	-0.750647	-0.736945	-0.554752	-0.680781		FBXO16	FBXO16	FBXO16.L;FBXO16	FBXO16	FBXO16	F-BOX ONLY PROTEIN 16-LIKE;FBXO16	FBXO16	FBX16_HUMAN;FBXO16	PUTATIVE F-BOX ONLY PROTEIN 16;FBXO16	FBX16_HUMAN;FBXO16	F-BOX ONLY PROTEIN 16
1432	PORTHOMCL1432[AjBfCgCiDrGgLvMmOjOlPsSpXl|(25 genes, 13 taxa)]:	-0.626484	-0.762681	-0.577418	0.380588	-0.474142	0.445941	-0.636662	-0.474056	-0.657265	-0.790836	-0.593995	-0.680699	SRSF3	SRSF3	SRSF3;GM12355	LOC108708069	SRSF3B;SRSF3	SRSF3A;SRSF3B;SRSF3	SERINE/ARGININE-RICH SPLICING FACTOR 3-LIKE;SRSF3	SRSF3	SRSF3_MOUSE	PUTATIVE SERINE/ARGININE-RICH SPLICING FACTOR 7 ISOFORM X1;PUTATIVE RNA-BINDING PROTEIN RSF1 ISOFORM X2;HYPOTHETICAL PROTEIN	RBP1_DROME	RNA-BINDING PROTEIN RSF1, TRANSCRIPT VARIANT X1; RNA-BINDING PROTEIN RSF1, TRANSCRIPT VARIANT X2;SERINE/ARGININE-RICH SPLICING FACTOR 3, TRANSCRIPT VARIANT X1; SERINE/ARGININE-RICH SPLICING FACTOR 3, TRANSCRIPT VARIANT X2
7202	PORTHOMCL7202[AjBfCgDrGgLvMmOjOlPsSpXl|(12 genes, 12 taxa)]:	0.388846	0.547077	0.409375	0.222351	0.0223529	-0.698626	0	-0.72824	-0.5625	-0.712528	-0.765665	-0.680231	SLC25A43	SLC25A43	SLC25A43	LOC108698439;SLC25A43	SLC25A43	SLC25A43		SLC25A43	S2543_DANRE;SLC25A43	PUTATIVE SOLUTE CARRIER FAMILY 25 MEMBER 43;SLC25A43	S2543_DANRE;SLC25A43	SOLUTE CARRIER FAMILY 25 MEMBER 43;SLC25A43
7045	PORTHOMCL7045[AjBfCgDrGgLvMmOjOlPsSpXl|(12 genes, 12 taxa)]:	-0.0272527	-0.59411	-0.565659	0.440098	0.0884314	0.116353	0	-0.439333	-0.757118	-0.744066	-0.538913	-0.680032	OFD1	OFD1	OFD1	OFD1.L;OFD1	OFD1	OFD1			OFD1_MOUSE	PUTATIVE ORAL-FACIAL-DIGITAL SYNDROME 1 PROTEIN-LIKE	OFD1_MOUSE	ORAL-FACIAL-DIGITAL SYNDROME 1 PROTEIN
6219	PORTHOMCL6219[AjBfCgCiDrGgLvMmOjOlPsSpXl|(13 genes, 13 taxa)]:	0.357143	-0.552264	-0.499451	0.187426	-0.762147	-0.823353	-0.175195	0.0123776	-0.689559	-0.764396	-0.585049	-0.679668	ADSL	ADSL	ADSL	ADSL.L;ADSL	ADSL	ADSL	ADENYLOSUCCINATE LYASE-LIKE;ADSL	ADSL	PUR8_CHICK;ADSL	PUTATIVE ADENYLOSUCCINATE LYASE ISOFORM X1;ADSL	PUR8_CHICK	ADENYLOSUCCINATE LYASE, TRANSCRIPT VARIANT X2; ADENYLOSUCCINATE LYASE, TRANSCRIPT VARIANT X1;ADSL
2302	PORTHOMCL2302[AjBfCgCiDrGgLvMmOjOlPsSpXl|(20 genes, 13 taxa)]:	-0.520495	-0.763912	-0.651758	0.362721	-0.751324	0.208294	-0.680844	0.796364	-0.626676	-0.742436	-0.669853	-0.679655	DNAJC10	DNAJC10	DNAJC10	DNAJC10.L;DNAJC10.S;DNAJC10	DNAJC10	DNAJC10	DNAJ HOMOLOG SUBFAMILY C MEMBER 10;DNAJC10	DNAJC10	DJC10_XENLA	PUTATIVE DNAJ-LIKE SUBFAMILY C MEMBER 10;PUTATIVE THIOREDOXIN DOMAIN-CONTAINING PROTEIN;DNAJC10	DJC10_XENLA	DNAJ HOMOLOG SUBFAMILY C MEMBER 10
7071	PORTHOMCL7071[AjBfCgCiDrGgLvMmOjOlSp|(12 genes, 11 taxa)]:	0.275769	0	-0.611044	0	-0.612525	0.212353	-0.772117	-0.710818	-0.875069	-0.799613	-0.363971	-0.679551	HELQ		HELQ		HELQ	HELQ	HELICASE POLQ-LIKE;HELQ	HELQ	DPOLQ_HUMAN;POLQ	PUTATIVE HELICASE POLQ-LIKE;HELQ	HELQ_HUMAN	HELICASE POLQ-LIKE;HELQ
6411	PORTHOMCL6411[AjBfCgCiDrLvMmOjOlPsSpXl|(13 genes, 12 taxa)]:	0	-0.632791	-0.598516	0.336299	0.0394608	0.627235	-0.784844	-0.472412	-0.812618	-0.825903	-0.399877	-0.679466		SF3B2	SF3B2	SF3B2.S;SF3B2	SF3B2	SF3B2	SPLICING FACTOR 3B SUBUNIT 2-LIKE;SF3B2	SF3B2	SF3B2_HUMAN;SF3B2	PUTATIVE SPLICING FACTOR 3B SUBUNIT 2-LIKE;HYPOTHETICAL PROTEIN;SF3B2	SF3B2_HUMAN	UNCHARACTERIZED LOC580638
866	PORTHOMCL866[AjBfCgCiDrGgLvMmOjOlPsSpXl|(31 genes, 13 taxa)]:	0.275549	-0.728176	-0.558352	0.00955882	-0.816985	-0.344794	-0.121519	0.0320979	-0.822029	-0.786749	-0.429534	-0.679438	NDST1;NDST4;NDST2;NDST3	NDST3;NDST1	NDST1;NDST2;NDST3	NDST2.L;NDST1.L;NDST4.S;NDST3.S;NDST2;NDST4	NDST1A;NDST2A;NDST3;NDST2;NDST4	NDST2A;NDST3;NDST1 (1 OF MANY);NDST1A;NDST2;NDST4	BIFUNCTIONAL HEPARAN SULFATE N-DEACETYLASE/N-SULFOTRANSFERASE 4		NDST4_MOUSE	PUTATIVE BIFUNCTIONAL HEPARAN SULFATE N-DEACETYLASE/N-SULFOTRANSFERASE-LIKE	NDST1_XENTR;NDST2_HUMAN	BIFUNCTIONAL HEPARAN SULFATE N-DEACETYLASE/N-SULFOTRANSFERASE 1, TRANSCRIPT VARIANT X2; BIFUNCTIONAL HEPARAN SULFATE N-DEACETYLASE/N-SULFOTRANSFERASE 1, TRANSCRIPT VARIANT X1;NDST4
1498	PORTHOMCL1498[AjBfCgCiDrGgLvMmOjOlPsSpXl|(24 genes, 13 taxa)]:	-0.205659	0.130374	-0.661593	0.21625	0.49951	-0.886324	-0.499675	-0.575282	-0.628206	-0.826316	-0.583211	-0.679244	MTHFD2;MTHFD2L	MTHFD2;MTHFD2L	MTHFD2L;MTHFD2	MTHFD2.S;MTHFD2L.L;MTHFD2.L;MTHFD2;MTHFD2L	MTHFD2;MTHFD2L	MTHFD2;MTHFD2L	BIFUNCTIONAL METHYLENETETRAHYDROFOLATE DEHYDROGENASE/CYCLOHYDROLASE, MITOCHONDRIAL-LIKE;MTHFD2	MTHFD2	MTDC_MOUSE;MTHFD2	PUTATIVE BIFUNCTIONAL METHYLENETETRAHYDROFOLATE DEHYDROGENASE/CYCLOHYDROLASE, MITOCHONDRIAL-LIKE;PUTATIVE BIFUNCTIONAL METHYLENETETRAHYDROFOLATE DEHYDROGENASE/CYCLOHYDROLASE 2-LIKE;MTHFD2	C1TC_RAT;MTDC_CHICK;MTDC_DROME;MTHFD1	BIFUNCTIONAL METHYLENETETRAHYDROFOLATE DEHYDROGENASE/CYCLOHYDROLASE, MITOCHONDRIAL;MTHFD2
6048	PORTHOMCL6048[BfCgCiDrGgLvMmOjOlPsSpXl|(14 genes, 12 taxa)]:	-0.288626	-0.641275	0.56978	-0.128431	-0.759877	-0.848265	-0.851675	-0.567069	-0.678235	-0.737276	-0.622181	-0.679231	LIPT1	LIPT1	LIPT1	LIPT1.L;LIPT1	LIPT1	LIPT1	LIPOYLTRANSFERASE 1, MITOCHONDRIAL-LIKE		LIPT_BOVIN;LIPT_MOUSE		LIPT_BOVIN;LIPT_HUMAN	LIPOYLTRANSFERASE 1, MITOCHONDRIAL;LIPT1
4212	PORTHOMCL4212[AjBfCgCiDrGgLvMmOjPsSpXl|(16 genes, 12 taxa)]:	0.296968	0.26573	0.652965	-0.637458	0	0	-0.740558	-0.266551	-0.776088	-0.678514	-0.582598	-0.679067	FAM81A;FAM81B	FAM81A;FAM81B	FAM81A;FAM81B	FAM81B.L		BX942837.1	PROTEIN FAM81A		FA81A_MOUSE	HYPOTHETICAL PROTEIN	FA81A_HUMAN	PROTEIN FAM81A
5932	PORTHOMCL5932[CgCiDrGgLvMmOjOlPsSpXl|(14 genes, 11 taxa)]:	-0.682527	-0.75978	-0.804286	-0.199828	0.0570098	0.322971	-0.698494	0	-0.7935	-0.77806	-0.465564	-0.679041	TRRAP	TRRAP	TRRAP	LOC108701575	TRRAP	TRRAP	TRANSFORMATION/TRANSCRIPTION DOMAIN-ASSOCIATED PROTEIN, TRANSCRIPT VARIANT X2; TRANSFORMATION/TRANSCRIPTION DOMAIN-ASSOCIATED PROTEIN, TRANSCRIPT VARIANT X1; TRANSFORMATION/TRANSCRIPTION DOMAIN-ASSOCIATED PROTEIN, TRANSCRIPT VARIANT X3;TRANSFORMATION/TRANSCRIPTION DOMAIN-ASSOCIATED PROTEIN-LIKE;TRRAP		TRRAP		TRRAP_MOUSE	TRANSFORMATION/TRANSCRIPTION DOMAIN-ASSOCIATED PROTEIN-LIKE;TRANSFORMATION/TRANSCRIPTION DOMAIN-ASSOCIATED PROTEIN;TRRAP
2083	PORTHOMCL2083[AjBfCgCiDrGgLvMmOjOlPsSpXl|(21 genes, 13 taxa)]:	-0.272198	-0.816484	-0.206813	-0.350098	0.293426	-0.0815657	-0.599571	-0.0796503	-0.822176	-0.73581	-0.478799	-0.678929	KIF3B	KIF3B;KIF17	KIF3C	KIF17.L		KIF17;KIF3CB	KINESIN-LIKE PROTEIN KIF17;KIF17		KIF17_MOUSE	PUTATIVE KINESIN-LIKE PROTEIN KIF17-LIKE;PUTATIVE KINESIN-LIKE PROTEIN KIF17	OSM3_CAEEL	KINESIN-LIKE PROTEIN KIF17;KINESIN II, 85 KDA
6799	PORTHOMCL6799[AjCgDrGgLvMmOjOlPsSpXl|(13 genes, 11 taxa)]:	0.248516	-0.675824	0.66044	0.383824	0.310074	-0.254484	0	0	-0.878147	-0.793209	-0.365196	-0.678851	NAB1	NAB1	NAB1	NAB1.S	NAB1A	NAB1B;NAB1A;NAB1			NAB1_RAT;NAB1	PUTATIVE NUCLEAR TRANSCRIPTION FACTOR Y SUBUNIT GAMMA ISOFORM X2;PUTATIVE NUCLEAR TRANSCRIPTION FACTOR Y SUBUNIT GAMMA ISOFORM X1	NAB1_MESAU	NUCLEAR TRANSCRIPTION FACTOR Y SUBUNIT GAMMA, TRANSCRIPT VARIANT X1; NUCLEAR TRANSCRIPTION FACTOR Y SUBUNIT GAMMA, TRANSCRIPT VARIANT X2
2371	PORTHOMCL2371[AjBfCgCiDrGgLvMmOjOlPsSpXl|(20 genes, 13 taxa)]:	-0.126154	-0.252835	-0.707253	0.393358	0.576814	0.527382	-0.933792	0.0802888	-0.624118	-0.749329	-0.66299	-0.678812	ARFGAP3;ARFGAP2	ARFGAP3	ARFGAP3;ARFGAP2	ARFGAP3.L;ARFGAP2.L;ARFGAP3.S;ARFGAP3	ARFGAP3	ARFGAP3	ARF GTPASE ACTIVATING PROTEIN 10, TRANSCRIPT VARIANT X1; ARF GTPASE ACTIVATING PROTEIN 10, TRANSCRIPT VARIANT X3; ARF GTPASE ACTIVATING PROTEIN 10, TRANSCRIPT VARIANT X2; ARF GTPASE ACTIVATING PROTEIN 10;ADP-RIBOSYLATION FACTOR GTPASE-ACTIVATING PROTEIN 3-LIKE		ARFG2_RAT	PUTATIVE ADP-RIBOSYLATION FACTOR GTPASE-ACTIVATING PROTEIN 2-LIKE ISOFORM X1;ADP-RIBOSYLATION FACTOR GTPASE-ACTIVATING PROTEIN 2	ARFG2_RAT	ADP-RIBOSYLATION FACTOR GTPASE-ACTIVATING PROTEIN 2;ARFGAP2
3363	PORTHOMCL3363[AjBfCgCiDrGgLvMmOjOlPsSpXl|(17 genes, 13 taxa)]:	-0.473132	-0.678418	-0.535824	0.131863	0.0969118	0.192206	-0.710675	0.146264	-0.823059	-0.888916	-0.32402	-0.678665	AHCTF1	AHCTF1	AHCTF1	AHCTF1.L;MGC83673;AHCTF1	AHCTF1	AHCTF1	PROTEIN ELYS-LIKE		ELYS_XENLA	HYPOTHETICAL PROTEIN	ELYS_XENLA	PROTEIN ELYS;PROTEIN ELYS-LIKE, TRANSCRIPT VARIANT X2; PROTEIN ELYS-LIKE, TRANSCRIPT VARIANT X1
3954	PORTHOMCL3954[AjBfCgCiDrGgLvMmOjPsSpXl|(16 genes, 12 taxa)]:	-0.481813	-0.792103	-0.0303846	-0.475527	0	-0.591513	-0.763558	-0.228767	-0.871941	-0.389205	-0.774142	-0.67843		TTC12	TTC12	TTC12.L;TTC12		TTC12	TETRATRICOPEPTIDE REPEAT PROTEIN 12-LIKE		TTC12_HUMAN	PUTATIVE TETRATRICOPEPTIDE REPEAT PROTEIN 12	TTC12_HUMAN	TETRATRICOPEPTIDE REPEAT PROTEIN 12
9790	PORTHOMCL9790[DrGgLvMmOjOlPsSpXl|(9 genes, 9 taxa)]:	-0.271978	-0.640044	-0.845824	-0.143137	-0.30973	-0.120294	0	0	-0.863	-0.870918	-0.300613	-0.678177	NCOA5	NCOA5	NCOA5	NCOA5.L;NCOA5	NCOA5	NCOA5			NCOA5_HUMAN		NCOA5_HUMAN	NUCLEAR RECEPTOR COACTIVATOR 5, TRANSCRIPT VARIANT X1; NUCLEAR RECEPTOR COACTIVATOR 5, TRANSCRIPT VARIANT X2
1714	PORTHOMCL1714[AjCgCiDrGgLvMmOjOlPsSpXl|(23 genes, 12 taxa)]:	0.782363	-0.0586374	-0.153791	-0.363775	-0.338922	-0.745765	-0.77061	0	-0.554441	-0.802443	-0.677451	-0.678112	SLC22A15		SLC22A15	LOC108719657;SLC22A15.2.S	SLC22A15	SLC22A15	SOLUTE CARRIER FAMILY 22 MEMBER 15-LIKE, TRANSCRIPT VARIANT X2; SOLUTE CARRIER FAMILY 22 MEMBER 15-LIKE, TRANSCRIPT VARIANT X1;SOLUTE CARRIER FAMILY 22 MEMBER 15-LIKE;SOLUTE CARRIER FAMILY 22 MEMBER 15-LIKE, TRANSCRIPT VARIANT X1; SOLUTE CARRIER FAMILY 22 MEMBER 15-LIKE, TRANSCRIPT VARIANT X2;SLC22A15		S22FL_XENLA;S22FL_XENTR;SLC22A15	PUTATIVE SOLUTE CARRIER FAMILY 22 MEMBER 15-LIKE	S22FL_XENLA	SOLUTE CARRIER FAMILY 22 MEMBER 15-LIKE
2041	PORTHOMCL2041[AjBfCgCiDrGgLvMmOjOlPsSpXl|(21 genes, 13 taxa)]:	-0.461209	-0.55178	-0.548462	-0.220711	-0.317475	-0.316676	0.431571	-0.276195	-0.802941	-0.487719	-0.743627	-0.678096	WDR3	WDR3	WDR3	WDR3.S;WDR3		WDR3	WD REPEAT-CONTAINING PROTEIN 3;WDR3	WDR3	WDR3_MOUSE;WDR3_HUMAN;WDR3	HYPOTHETICAL PROTEIN;PUTATIVE WD REPEAT-CONTAINING PROTEIN 3;WDR3	WDR3_MOUSE;WDR3	WD REPEAT-CONTAINING PROTEIN 3;WD REPEAT-CONTAINING PROTEIN 3-LIKE;WDR3
2847	PORTHOMCL2847[AjBfCgDrGgLvMmOjOlPsSpXl|(18 genes, 12 taxa)]:	-0.169176	-0.37156	0.939451	-0.194461	0.085	0.140559	0	-0.776683	-0.727471	-0.755851	-0.549755	-0.677692	RREB1	RREB1	RREB1	LOC108719123;RREB1.S;RREB1	RREB1A	RREB1A			RREB1_CHICK	PUTATIVE RAS-RESPONSIVE ELEMENT-BINDING PROTEIN 1	RREB1_CHICK	RAS-RESPONSIVE ELEMENT-BINDING PROTEIN 1
701	PORTHOMCL701[AjBfCgCiDrGgLvMmOjOlPsSpXl|(35 genes, 13 taxa)]:	0.0558242	-0.235253	0.539835	-0.0701961	0.164583	-0.604542	-0.873792	-0.224406	-0.657618	-0.761631	-0.611765	-0.677004	SLC36A4;SLC36A1	SLC36A1;SLC36A4	SLC36A1;SLC36A3;SLC36A4;SLC36A2	SLC36A1.L;SLC36A4.L;SLC36A1.S;SLC36A4;SLC36A1	SLC36A1	SLC36A4;SLC36A1	PROTON-COUPLED AMINO ACID TRANSPORTER 1, TRANSCRIPT VARIANT X6; PROTON-COUPLED AMINO ACID TRANSPORTER 1, TRANSCRIPT VARIANT X4; PROTON-COUPLED AMINO ACID TRANSPORTER 1, TRANSCRIPT VARIANT X3; PROTON-COUPLED AMINO ACID TRANSPORTER 1, TRANSCRIPT VARIANT X2; PROTON-COUPLED AMINO ACID TRANSPORTER 1, TRANSCRIPT VARIANT X1; PROTON-COUPLED AMINO ACID TRANSPORTER 1, TRANSCRIPT VARIANT X5	SLC36A1	ANTL1_ARATH;S36A4_MOUSE;S36A1_HUMAN;LOC108100988	PUTATIVE PROTON-COUPLED AMINO ACID TRANSPORTER 1;PUTATIVE PROTON-COUPLED AMINO ACID TRANSPORTER 1 ISOFORM X3	S36A1_HUMAN;S36A4_MOUSE	PROTON-COUPLED AMINO ACID TRANSPORTER 1;PROTON-COUPLED AMINO ACID TRANSPORTER 1, TRANSCRIPT VARIANT X5; PROTON-COUPLED AMINO ACID TRANSPORTER 1, TRANSCRIPT VARIANT X2; PROTON-COUPLED AMINO ACID TRANSPORTER 1, TRANSCRIPT VARIANT X3; PROTON-COUPLED AMINO ACID TRANSPORTER 1, TRANSCRIPT VARIANT X4; PROTON-COUPLED AMINO ACID TRANSPORTER 1, TRANSCRIPT VARIANT X1;SLC36A1
5634	PORTHOMCL5634[AjBfCgCiDrGgLvMmOjOlPsSpXl|(14 genes, 13 taxa)]:	0.393242	-0.870418	0.140549	-0.735123	0.188848	-0.00255882	-0.929688	-0.325466	-0.752088	-0.758989	-0.519608	-0.676895	RNF139	RNF139	RNF139	RNF139.S;RNF139.L;RNF139	RNF139	RNF139	E3 UBIQUITIN-PROTEIN LIGASE RNF139-LIKE	RNF139	RN139_HUMAN;RNF139	PUTATIVE E3 UBIQUITIN-PROTEIN LIGASE;RNF139	RN139_HUMAN;RNF139	E3 UBIQUITIN-PROTEIN LIGASE RNF139-LIKE;RNF139
1933	PORTHOMCL1933[AjCgCiDrGgLvMmOjOlPsSpXl|(22 genes, 12 taxa)]:	0.63544	-0.16844	-0.257088	0.00328431	-0.163922	0.149588	-0.914416	0	-0.689176	-0.756718	-0.584559	-0.676818	NRBP1;NRBP2	NRBP1;NRBP2	NRBP1;NRBP2	NRBP1.S;NRBP1.L;NRBP2.L;NRBP1;NRBP2	NUCLEAR RECEPTOR-BINDING PROTEIN;NRBP1;NRBP2B	NRBP1;NRBP2A;NRBP2B;NRBP2	NUCLEAR RECEPTOR-BINDING PROTEIN-LIKE, TRANSCRIPT VARIANT X1; NUCLEAR RECEPTOR-BINDING PROTEIN-LIKE, TRANSCRIPT VARIANT X2;NRBP1		NRBP_PONAB;NRBP1	PUTATIVE NUCLEAR RECEPTOR-BINDING PROTEIN-LIKE	NRBP_PONAB	NUCLEAR RECEPTOR-BINDING PROTEIN;NRBP2
6739	PORTHOMCL6739[AjBfCgCiDrGgLvMmOjOlPsSpXl|(13 genes, 13 taxa)]:	0.344011	-0.12189	0.771433	0.245294	-0.182721	-0.556811	-0.781584	0.315315	-0.906676	-0.749329	-0.373529	-0.676512	AMDHD1	AMDHD1	AMDHD1	AMDHD1.L;AMDHD1	SI:CH73-71D17.1;AMDHD1	AMDHD1	PROBABLE IMIDAZOLONEPROPIONASE;AMDHD1	AMDHD1	HUTI_NEMVE;AMDHD1	PUTATIVE IMIDAZOLONEPROPIONASE;AMDHD1	HUTI_NEMVE;AMDHD1	PROBABLE IMIDAZOLONEPROPIONASE;AMDHD1
10195	PORTHOMCL10195[GgLvMmOjOlSpXl|(8 genes, 7 taxa)]:	-0.17022	0	-0.549286	-0.551593	0.205686	0	0	0	-0.467706	-0.81032	-0.751225	-0.676417			COG4	LOC108714149;COG4	COG4				COG4_MOUSE;COG4		COG4_BOVIN;COG4	CONSERVED OLIGOMERIC GOLGI COMPLEX SUBUNIT 4-LIKE;COG4
6300	PORTHOMCL6300[AjBfCgCiDrGgLvMmOjOlPsSpXl|(13 genes, 13 taxa)]:	-0.682363	-0.717626	-0.759725	0.40813	-0.401544	0.517647	-0.769883	0.598881	-0.751	-0.74613	-0.530637	-0.675922		CEP152	CEP152	LOC108712907;CEP152	CEP152	CEP152	CENTROSOMAL PROTEIN OF 152 KDA-LIKE		CE152_XENLA	PUTATIVE CENTROSOMAL PROTEIN	CE152_XENLA	CENTROSOMAL PROTEIN OF 152 KDA, TRANSCRIPT VARIANT X1; CENTROSOMAL PROTEIN OF 152 KDA, TRANSCRIPT VARIANT X3; CENTROSOMAL PROTEIN OF 152 KDA, TRANSCRIPT VARIANT X2
2531	PORTHOMCL2531[AjBfCgCiDrGgLvMmOjOlPsSpXl|(19 genes, 13 taxa)]:	-0.247363	-0.79222	-0.742692	0.405074	0.0970098	0.720941	-0.795013	0.0436313	-0.662735	-0.80291	-0.56201	-0.675885	MCM3AP	MCM3AP	MCM3AP	MCM3AP.L;MCM3AP	MCM3AP	MCM3AP	GERMINAL-CENTER ASSOCIATED NUCLEAR PROTEIN;LOC100178754		GANP_MOUSE	PUTATIVE GERMINAL-CENTER ASSOCIATED NUCLEAR PROTEIN;HYPOTHETICAL PROTEIN;PUTATIVE 80 KDA MCM3-ASSOCIATED PROTEIN	GANP_MOUSE	GERMINAL-CENTER ASSOCIATED NUCLEAR PROTEIN
4890	PORTHOMCL4890[AjBfCgCiDrGgLvMmOjOlPsSpXl|(15 genes, 13 taxa)]:	-0.421648	-0.607033	-0.526044	-0.0911029	-0.189828	0.320206	-0.913052	-0.548577	-0.645647	-0.73354	-0.648284	-0.675824	ESCO2	ESCO2	ESCO2	ESCO2.S	ESCO2;UNCHARACTERIZED LOC101163936	ESCO2	N-ACETYLTRANSFERASE ESCO2	ESCO1	ESCO1_HUMAN	PUTATIVE SERINE/ARGININE REPETITIVE MATRIX PROTEIN 1 ISOFORM X2	ESCO1_HUMAN	N-ACETYLTRANSFERASE ESCO2, TRANSCRIPT VARIANT X2; N-ACETYLTRANSFERASE ESCO2, TRANSCRIPT VARIANT X1
15394	PORTHOMCL15394[BfLvOjSp|(4 genes, 4 taxa)]:	0	0	0	0	0	0	0	-0.796955	-0.795232	-0.77368	-0.458407	-0.675773									PRSR3_MOUSE		PRSR3_MOUSE	UNCHARACTERIZED LOC100891275
2782	PORTHOMCL2782[AjBfCgCiDrGgLvMmOjOlPsSpXl|(18 genes, 13 taxa)]:	-0.320055	-0.526374	0.231455	0.420693	0.689885	0.038905	0.294819	-0.476311	-0.751739	-0.704879	-0.570498	-0.675706	HORMAD1;HORMAD2	HORMAD2	HORMAD1;HORMAD2	HORMAD1.S;HORMAD1	HORMAD1	HORMAD1	HORMA DOMAIN-CONTAINING PROTEIN 2-LIKE		HORM1_XENLA	PUTATIVE HORMA DOMAIN-CONTAINING PROTEIN 1-LIKE	HORM1_MOUSE;HORM1_RAT	HORMA DOMAIN-CONTAINING PROTEIN 2;UNCHARACTERIZED LOC100892924
4224	PORTHOMCL4224[AjBfCgCiDrGgLvMmOjOlPsSpXl|(16 genes, 13 taxa)]:	-0.299286	-0.656132	-0.488846	-0.243946	0.0688971	-0.323	-0.852416	0.117203	-0.810735	-0.643509	-0.572794	-0.675679	TAF12	TAF12	TAF12	TAF12.L;TAF12.S;TAF12	TAF12	TAF12	TRANSCRIPTION INITIATION FACTOR TFIID SUBUNIT 12-LIKE		TAF12_MOUSE;TAF12	PUTATIVE TRANSCRIPTION INITIATION FACTOR TFIID SUBUNIT 12;TAF12	TAF12_HUMAN	TRANSCRIPTION INITIATION FACTOR TFIID SUBUNIT 12
2938	PORTHOMCL2938[AjBfCgCiDrGgLvMmOjOlPsSpXl|(18 genes, 13 taxa)]:	-0.229011	-0.599604	-0.70489	-0.224657	0.130417	0.722412	-0.765065	-0.864545	-0.641647	-0.797337	-0.5875	-0.675495	CNOT7;CNOT8	CNOT7	CNOT7;CNOT8	CNOT7.S;CNOT7	CNOT7	CNOT7;CNOT8	CNOT7/8 PROTEIN;CNOT7	CNOT7	CNOT7_HUMAN;ASGL1_MACFA;CNOT7	PUTATIVE CCR4-NOT TRANSCRIPTION COMPLEX SUBUNIT 7 ISOFORM X2;CNOT7	CNOT7_HUMAN;CNOT7	CCR4-NOT TRANSCRIPTION COMPLEX SUBUNIT 7, TRANSCRIPT VARIANT X1; CCR4-NOT TRANSCRIPTION COMPLEX SUBUNIT 7, TRANSCRIPT VARIANT X2;CNOT7
4003	PORTHOMCL4003[AjBfCgCiDrGgLvMmOjOlPsSpXl|(16 genes, 13 taxa)]:	-0.219505	-0.0461099	-0.48033	-0.471691	-0.659877	-0.724235	-0.811117	0.824126	-0.930412	-0.385181	-0.710784	-0.675459	AAMP	AAMP	AAMP	AAMP.L;AAMP.S;AAMP	AAMP	AAMP	ANGIO-ASSOCIATED MIGRATORY CELL PROTEIN-LIKE, TRANSCRIPT VARIANT X2; ANGIO-ASSOCIATED MIGRATORY CELL PROTEIN-LIKE, TRANSCRIPT VARIANT X1; ANGIO-ASSOCIATED MIGRATORY CELL PROTEIN-LIKE, TRANSCRIPT VARIANT X3;AAMP	AAMP	AAMP_BOVIN	PUTATIVE ANGIO-ASSOCIATED MIGRATORY CELL PROTEIN;AAMP	AAMP_CANLF;AAMP_HUMAN;AAMP	ANGIO-ASSOCIATED MIGRATORY CELL PROTEIN;AAMP
2955	PORTHOMCL2955[AjBfCgCiDrGgLvMmOjOlPsSpXl|(18 genes, 13 taxa)]:	-0.15	-0.650505	-0.738846	-0.164142	-0.204877	0.190676	-0.753961	-0.0378694	-0.863559	-0.736409	-0.42598	-0.675316	DNMT1	DNMT1	DNMT1	DNMT1.L;DNMT1.S;DNMT1	DNMT1	DNMT1	ZN-FINGER (CXXC)-5;DNMT1	DNMT1	DNMT1_PARLI;DNMT1	DNA (CYTOSINE-5)-METHYTRANSFERASE 1	DNMT1_PARLI;DNMT1	DNA (CYTOSINE-5)-METHYLTRANSFERASE PLIMCI, TRANSCRIPT VARIANT X2; DNA (CYTOSINE-5)-METHYLTRANSFERASE PLIMCI, TRANSCRIPT VARIANT X1;DNMT1
7162	PORTHOMCL7162[AjBfCiDrGgLvMmOjOlPsSpXl|(12 genes, 12 taxa)]:	-0.117088	-0.318462	-0.561044	0.017402	-0.122157	-0.875353	-0.832208	0.495664	-0.619971	-0.700125	-0.705515	-0.675203	AAAS	AAAS	AAAS	AAAS.L;AAAS	AAAS	AAAS	ALADIN-LIKE	AAAS	AAAS_HUMAN;AAAS	PUTATIVE ALADIN;AAAS	AAAS_MOUSE;AAAS	ALADIN;AAAS
5472	PORTHOMCL5472[AjBfCgCiDrGgLvMmOjOlPsSpXl|(14 genes, 13 taxa)]:	-0.345934	-0.848835	-0.573901	-0.178015	-0.54424	-0.249529	0.110584	-0.837349	-0.778971	-0.642828	-0.602206	-0.674668	INTS8	INTS8	INTS8	INTS8.S;INTS8	INTS8	INTS8	INTEGRATOR COMPLEX SUBUNIT 8-LIKE	INTS8	INT8_HUMAN	PUTATIVE INTEGRATOR COMPLEX SUBUNIT 8 ISOFORM X2	INT8_XENLA	INTEGRATOR COMPLEX SUBUNIT 8, TRANSCRIPT VARIANT X1; INTEGRATOR COMPLEX SUBUNIT 8, TRANSCRIPT VARIANT X2
4579	PORTHOMCL4579[AjBfCgDrGgLvMmOjOlPsSpXl|(15 genes, 12 taxa)]:	-0.40511	-0.729846	-0.564011	0.343407	0.127377	0.0374118	0	-0.169833	-0.863412	-0.738679	-0.421446	-0.674512	DNAJA2	DNAJA2	DNAJA2	DNAJA2.S	DNAJA2A;DNAJA2B;DNAJA2	DNAJA2L;DNAJA2		DNAJA2	DNJA2_BOVIN	PUTATIVE DNAJ-LIKE SUBFAMILY A MEMBER 2 ISOFORM X2;DNAJA2	DNJA2_BOVIN	DNAJ HOMOLOG SUBFAMILY A MEMBER 2, TRANSCRIPT VARIANT X1; DNAJ HOMOLOG SUBFAMILY A MEMBER 2, TRANSCRIPT VARIANT X2;DNAJA2
4810	PORTHOMCL4810[AjBfCgCiDrGgLvMmOjOlPsSpXl|(15 genes, 13 taxa)]:	-0.581374	-0.579341	-0.548516	-0.851225	-0.584902	-0.324206	-0.415312	-0.15485	-0.852353	-0.522312	-0.648284	-0.674316	PSMD6	PSMD6	PSMD6	PSMD6.L;PSMD6	PSMD6	PSMD6	26S PROTEASOME NON-ATPASE REGULATORY SUBUNIT 6;PSMD6	PSMD6	PSMD6_HUMAN;GDAP1_HUMAN;PSMD6	PUTATIVE 26S PROTEASOME NON-ATPASE REGULATORY SUBUNIT 6;PSMD6	PSMD6_HUMAN;PSMD6	26S PROTEASOME NON-ATPASE REGULATORY SUBUNIT 6;PSMD6
6904	PORTHOMCL6904[AjBfCgCiDrLvMmOjOlPsSpXl|(13 genes, 12 taxa)]:	0	-0.129011	-0.796154	-0.212525	0.13674	0.345941	-0.837325	-0.722797	-0.722235	-0.79515	-0.50527	-0.674218		GPS2	GPS2	GPS2.S;GPS2	GPS2	GPS2	G PROTEIN PATHWAY SUPPRESSOR 2, TRANSCRIPT VARIANT X1; G PROTEIN PATHWAY SUPPRESSOR 2, TRANSCRIPT VARIANT X2;LOC100185651		GPS2_HUMAN;GPS2	PUTATIVE G PROTEIN PATHWAY SUPPRESSOR 2	GPS2_HUMAN	G PROTEIN PATHWAY SUPPRESSOR 2
5832	PORTHOMCL5832[AjBfCgCiDrGgLvMmOjOlPsSpXl|(14 genes, 13 taxa)]:	0.258736	-0.530593	-0.549725	0.377892	0.087451	0.518206	-0.769675	0.29	-0.781971	-0.686791	-0.553186	-0.673982	PAF1	PAF1	PAF1	PAF1.L;PAF1	PAF1	PAF1	RNA POLYMERASE II-ASSOCIATED FACTOR 1 HOMOLOG	PAF1	PAF1_XENTR;PAF1	PUTATIVE RNA POLYMERASE II-ASSOCIATED FACTOR 1-LIKE;PAF1	PAF1_XENTR	RNA POLYMERASE II-ASSOCIATED FACTOR 1 HOMOLOG;PAF1
4126	PORTHOMCL4126[AjBfCgCiDrGgLvMmOjOlPsSpXl|(16 genes, 13 taxa)]:	-0.516264	-0.48211	-0.557473	-0.319926	0.036348	-0.194618	-0.84274	0.146294	-0.762529	-0.851703	-0.40723	-0.673821	RBM19	RBM19	RBM19	RBM19.L;RBM19.S;RBM19	RBM19	RBM19	PROBABLE RNA-BINDING PROTEIN 19;RBM19		RBM19_HUMAN;RBM19	PUTATIVE RNA-BINDING PROTEIN 19 ISOFORM X2;RBM19	RBM19_HUMAN;RBM19	PROBABLE RNA-BINDING PROTEIN 19
5376	PORTHOMCL5376[AjBfCgCiDrGgLvMmOjOlPsSpXl|(14 genes, 13 taxa)]:	0.0246154	-0.0208791	-0.859396	-0.498873	-0.558181	-0.705234	-0.840558	0.0728734	-0.665618	-0.791682	-0.564093	-0.673798	WDR54	WDR54	WDR54	WDR54.L;WDR54	WDR54	WDR54	WD REPEAT-CONTAINING PROTEIN 54-LIKE	WDR54	WDR54_MOUSE	PUTATIVE WD REPEAT-CONTAINING PROTEIN 54 ISOFORM X2	WDR54_MOUSE	WD REPEAT-CONTAINING PROTEIN 54, TRANSCRIPT VARIANT X1; WD REPEAT-CONTAINING PROTEIN 54, TRANSCRIPT VARIANT X2
5642	PORTHOMCL5642[AjBfCgCiDrGgLvMmOjOlPsSpXl|(14 genes, 13 taxa)]:	-0.363132	-0.718945	-0.735	0.183676	0.161618	0.395059	-0.168494	-0.890982	-0.862441	-0.56902	-0.589706	-0.673722	VPS54	VPS54	VPS54	LOC108716588;VPS54	VPS54	VPS54	VACUOLAR PROTEIN SORTING-ASSOCIATED PROTEIN 54;VPS54		VPS54_MOUSE;VPS54	PUTATIVE VACUOLAR PROTEIN SORTING-ASSOCIATED PROTEIN 54;VPS54	VPS54_HUMAN	VACUOLAR PROTEIN SORTING-ASSOCIATED PROTEIN 54;VPS54
1164	PORTHOMCL1164[AjBfCgCiDrGgLvMmOjOlPsSpXl|(27 genes, 13 taxa)]:	-0.453571	-0.802813	-0.806813	-0.575662	0.0736765	-0.682	-0.752857	-0.14028	-0.515265	-0.84533	-0.660076	-0.673557	ANAPC1	ANAPC1	ANAPC1	ANAPC1.S;ANAPC1	ANAPC1	ANAPC1	ANAPHASE-PROMOTING COMPLEX SUBUNIT 1-LIKE	ANAPC1	APC1_HUMAN;ANAPC1	PUTATIVE ANAPHASE-PROMOTING COMPLEX SUBUNIT 1-LIKE;PUTATIVE ANAPHASE-PROMOTING COMPLEX SUBUNIT 1 ISOFORM X3;PUTATIVE ANAPHASE-PROMOTING COMPLEX SUBUNIT 1	APC1_MOUSE	ANAPHASE-PROMOTING COMPLEX SUBUNIT 1-LIKE;ANAPHASE-PROMOTING COMPLEX SUBUNIT 1;UNCHARACTERIZED LOC105445018;ANAPC1
15400	PORTHOMCL15400[BfLvOjSp|(4 genes, 4 taxa)]:	0	0	0	0	0	0	0	0.714126	-0.664353	-0.84064	-0.514828	-0.673274											KHDC3_RAT	MYOSIN-9
4100	PORTHOMCL4100[AjBfCgCiDrGgLvMmOjOlPsSpXl|(16 genes, 13 taxa)]:	-0.411538	-0.493978	-0.583681	-0.160882	0.125833	0.714941	-0.331156	-0.439301	-0.881324	-0.748504	-0.389583	-0.673137	NUP98	NUP98	NUP98	LOC100174804;NUP98	NUP98	NUP98	NUCLEAR PORE COMPLEX PROTEIN NUP98-NUP96-LIKE		NUP98_RAT	PUTATIVE NUCLEAR PORE COMPLEX PROTEIN;HYPOTHETICAL PROTEIN	NUP98_HUMAN	NUCLEAR PORE COMPLEX PROTEIN NUP98-NUP96
3996	PORTHOMCL3996[AjBfCgCiDrGgLvMmOjOlPsSpXl|(16 genes, 13 taxa)]:	-0.25044	-0.122857	-0.516813	0.356667	-0.887549	0.371882	0.387909	0.563427	-0.788706	-0.772466	-0.458233	-0.673135	B4GAL-T7;B4GALT7	B4GALT7	B4GALT7	B4GALT7.L;B4GALT7.S;B4GALT7	B4GALT7	B4GALT7	BETA-1,4-GALACTOSYLTRANSFERASE 7;B4GALT7	B4GALT7	B4GT7_MOUSE	PUTATIVE BETA-1,4-GALACTOSYLTRANSFERASE 7;B4GALT7	B4GT7_MOUSE;B4GALT7	BETA-1,4-GALACTOSYLTRANSFERASE 7, TRANSCRIPT VARIANT X2; BETA-1,4-GALACTOSYLTRANSFERASE 7, TRANSCRIPT VARIANT X1;UNCHARACTERIZED LOC105443131;B4GALT7
3108	PORTHOMCL3108[AjBfCgCiDrGgLvMmOjOlPsSpXl|(18 genes, 13 taxa)]:	-0.316923	-0.690901	-0.547637	0.402402	0.0848529	0.703265	-0.871351	-0.185978	-0.739	-0.697822	-0.582353	-0.673058	WAPL	WAPAL;WAPL	WAPL	WAPL.L;WAPL.S;WAPL	WAPLA;WAPLB;WAPL	WAPLA;WAPLB;WAPL	WINGS APART-LIKE PROTEIN HOMOLOG, TRANSCRIPT VARIANT X1; WINGS APART-LIKE PROTEIN HOMOLOG, TRANSCRIPT VARIANT X2;LOC100184743		WAPL_HUMAN	PUTATIVE WINGS APART-LIKE PROTEIN-LIKE	WAPL_HUMAN	WINGS APART-LIKE PROTEIN HOMOLOG
1368	PORTHOMCL1368[AjBfCgDrGgLvMmOjOlPsSpXl|(25 genes, 12 taxa)]:	0.555989	-0.44044	-0.320769	-0.360466	-0.429706	0.195344	0	0.884266	-0.783265	-0.540351	-0.695343	-0.672986	FAM69B;DIPK1A;DIPK1B	FAM69A;FAM69B;DIPK1A;DIPK1B	FAM69A;FAM69B;DIPK1A;DIPK1B	FAM69A.L;FAM69A.S;FAM69B.L;FAM69B.S;DIPK1A;DIPK1B	DIPK1A (1 OF MANY);FAM69B;FAM69AA;DIPK1B	FAM69AA;FAM69B;FAM69AB;DIPK1B;DIPK1A (1 OF MANY)			FA69B_XENTR;DIPK1B	HYPOTHETICAL PROTEIN	FA69A_MOUSE;DIPK1B	PROTEIN FAM69A, TRANSCRIPT VARIANT X3; PROTEIN FAM69A, TRANSCRIPT VARIANT X4; PROTEIN FAM69A, TRANSCRIPT VARIANT X1; PROTEIN FAM69A, TRANSCRIPT VARIANT X2
7330	PORTHOMCL7330[AjBfCgDrGgLvMmOjOlPsSpXl|(12 genes, 12 taxa)]:	0.252363	0.396615	-0.24967	-0.227819	-0.000980392	0.0292647	0	0	-0.898294	-0.735005	-0.383088	-0.672129	TCF25	TCF25	TCF25	TCF25.L;TCF25	TCF25	TCF25		TCF25	TCF25_MOUSE;TCF25	PUTATIVE TRANSCRIPTION FACTOR 25;TCF25	TCF25_HUMAN;TCF25	TRANSCRIPTION FACTOR 25;TCF25
11085	PORTHOMCL11085[LvMmOjOlSpXl|(7 genes, 6 taxa)]:	0	0	-0.631099	-0.318873	-0.268064	0	0	0	-0.441412	-0.895439	-0.679044	-0.671965			SMC2	SMC2.L	SMC2				SMC2_XENLA		SMC2_XENLA;SMC2_CHICK	STRUCTURAL MAINTENANCE OF CHROMOSOMES PROTEIN 2-LIKE
0	PORTHOMCL0[AjBfCgCiDrGgLvMmOjOlPsSpXl|(2037 genes, 13 taxa)]:	0.163956	-0.732088	-0.87011	0.159461	-0.292132	0.0392353	-0.879299	-0.892098	-0.751941	-0.736244	-0.527328	-0.671838	PRDM5;ZNF319;PRDM15;ZBTB17;ZNF142;ZBTB11;ZNF710;ZNF292;ZBTB21;PATZ1;ZNF639;ZNF462;ZNF322;ZNF776;LOC102387328;ZNF696;ZBTB41;ZNF282;ZNF74;LOC102380602;ZNF777	ZNF787;ZNF319;ZBTB11;PRDM15;ZNF835;ZFP92;ZNF22;PRDM5;ZNF711;ZNF292;ZNF398;ZBTB17;ZBTB40;ZNF639;ZNF282;ZNF781;ZNF783;ZNF436;ZNF746;ZNF212;ZNF554;ZNF485;ZNF354A;ZNF135;ZNF268;ZNF572;ZNF613;ZFX;LOC102377053;LOC103657314;ZNF2;ZNF34;LOC106722842;ZNF777;ZNF605;ZNF771;ZNF570;ZNF334;ZNF213	ZFP2;ZFP101;ZFP37;GM14419;GM2004;ZFP934;ZFP27;ZFP160;ZFP53;2610044O15RIK8;ZFP935;GM15446;GM14443;ZFP563;ZFP808;GM29106;GM13212;GM14124;ZFP950;5430403G16RIK;ZFP712;ZFP420;ZFP51;GM17655;ZFP433;GM6710;GM14391;GM14326;ZFP454;ZFP169;ZFP763;ZFP871;GM5141;ZFP963;AU041133;PRDM15;GM3604;ZFP931;ZFP943;GM14412;ZFP93;ZFP933;ZFP970;ZFP317;D3ERTD254E;ZFP932;ZFP930;ZFP560;ZFP637;ZFP184;GM14403;ZFP629;ZFP235;ZFP…	LOC108713540;LOC108695545;LOC108718442;LOC108711632;LOC108713124;LOC108695583;LOC108695511;LOC108705846;LOC108703741;LOC108706892;LOC108719569;LOC108719517;LOC108697729;LOC108695504;ZNF177.S;LOC108704241;PRDM15.L;XELAEV18045008M;LOC108697732;ZNF628.L;ZNF229.S;XELAEV18030392M;LOC108695538;LOC108697025;ZNF71.L;LOC108703839;LOC108695525;LOC108719645;LOC108719566;LOC108719533;LOC108719527;LOC10869551…	ZINC FINGER PROTEIN 782-LIKE;ZNF319;ZINC FINGER PROTEIN 62;PRDM15;PRDM5;GASTRULA ZINC FINGER PROTEIN XLCGF57.1;ZNF1064;ZINC FINGER PROTEIN OZF-LIKE;ZINC FINGER PROTEIN 345;ZINC FINGER PROTEIN 11;ZINC FINGER PROTEIN 709;ZINC FINGER PROTEIN 208;ZINC FINGER X-CHROMOSOMAL PROTEIN;ZBTB41;ZNF319B;ZNF711;ZNF710B;ZNF710A;ZNF536;SI:CH211-198A12.6;ZINC FINGER PROTEIN 883;UNCHARACTERIZED LOC110016280;ZINC F…	SI:CH211-207I20.2;CU672268.1;SI:DKEY-20I20.8;ZGC:113886;ZNF1004;ZNF1028;ZNF1017;SI:CH211-89O9.6;SI:CH211-235I11.6;SI:DKEY-111K8.5;ZNF1144;CABZ01084612.1;BX000701.2;CABZ01084613.1;SI:DKEY-253D23.11;PRDM5;ZNF45L;ZNF1014;SI:CH73-158P21.2;SI:CABZ01071911.4;SI:CH211-234C11.2;ZNF970;ZNF1013;ZNF1132;ZNF1029;ZNF1021;ZNF992;ZBTB17;ZNF985;ZNF1009;CABZ01054394.1;SI:CH211-202H22.10;SI:DKEY-172K15.11;ZNF980;Z…	ZINC FINGER PROTEIN;NUCLEAR MIGRATION PROTEIN NUDC-LIKE, TRANSCRIPT VARIANT X2; NUCLEAR MIGRATION PROTEIN NUDC-LIKE, TRANSCRIPT VARIANT X1;ZINC FINGER PROTEIN 626-LIKE;ZINC FINGER PROTEIN CI-ZF(U1LIKE)-9, TRANSCRIPT VARIANT X1; ZINC FINGER PROTEIN CI-ZF(U1LIKE)-9;ZINC FINGER PROTEIN ZF(C2H2)-82, TRANSCRIPT VARIANT X1; ZINC FINGER PROTEIN ZF(C2H2)-82;GASTRULA ZINC FINGER PROTEIN XLCGF67.1-LIKE;ZIN…	ZFP760;ZNF226;ZNF22;ZFP934	ZN135_HUMAN;ZN726_HUMAN;ZN596_HUMAN;ZFP26_MOUSE;ZN391_HUMAN;AEF1_DROME;ZN677_HUMAN;ZNF85_HUMAN;ZN624_HUMAN;ZN436_HUMAN;Z286A_HUMAN;ZNF32	HYPOTHETICAL PROTEIN;PUTATIVE ZINC FINGER PROTEIN;PUTATIVE OOCYTE ZINC FINGER PROTEIN XLCOF6-LIKE;HISTONE-LYSINE N-METHYLTRANSFERASE PRDM9;PUTATIVE GASTRULA ZINC FINGER PROTEIN XLCGF52.1-LIKE;PUTATIVE KRAB BOX AND ZINC FINGER, C2H2 TYPE DOMAIN CONTAINING PROTEIN;PUTATIVE GASTRULA ZINC FINGER PROTEIN XLCGF26.1-LIKE;PUTATIVE PR DOMAIN ZINC FINGER PROTEIN 15;PUTATIVE ZINC FINGER AND SCAN DOMAIN-CONT…	ZN596_HUMAN;ZFP26_MOUSE;ZNF91_HUMAN;ZN436_MOUSE;GLAS_DROVI;Z585B_PONAB;ZN264_HUMAN;ZNF84_HUMAN;ZN329_HUMAN;ZFP27_MOUSE;PRDM9_MOUSE;ZN567_HUMAN;ZNF16_GORGO;ZN629_HUMAN;ZN337_HUMAN;ZG8_XENLA;ZNF311	ZINC FINGER PROTEIN OZF, TRANSCRIPT VARIANT X6; ZINC FINGER PROTEIN OZF, TRANSCRIPT VARIANT X7; ZINC FINGER PROTEIN OZF, TRANSCRIPT VARIANT X8; ZINC FINGER PROTEIN OZF, TRANSCRIPT VARIANT X3; ZINC FINGER PROTEIN OZF, TRANSCRIPT VARIANT X4; ZINC FINGER PROTEIN OZF, TRANSCRIPT VARIANT X5; ZINC FINGER PROTEIN OZF, TRANSCRIPT VARIANT X1; ZINC FINGER PROTEIN OZF, TRANSCRIPT VARIANT X2; ZINC FINGER PRO…
4332	PORTHOMCL4332[AjBfCgCiDrGgLvMmOjOlPsSpXl|(15 genes, 13 taxa)]:	-0.00763736	0.308703	-0.12967	-0.831201	0.242181	-0.0339118	-0.570117	-0.439333	-0.711412	-0.76452	-0.538725	-0.671552	ACP6	ACP6	ACP6	ACP6.S;ACP6	ACP6	ACP6	LYSOPHOSPHATIDIC ACID PHOSPHATASE TYPE 6-LIKE;LYSOPHOSPHATIDIC ACID PHOSPHATASE TYPE 6-LIKE, TRANSCRIPT VARIANT X3; LYSOPHOSPHATIDIC ACID PHOSPHATASE TYPE 6-LIKE, TRANSCRIPT VARIANT X1; LYSOPHOSPHATIDIC ACID PHOSPHATASE TYPE 6-LIKE, TRANSCRIPT VARIANT X2;ACP6	ACP6	PPA6_HUMAN	PUTATIVE LYSOPHOSPHATIDIC ACID PHOSPHATASE TYPE 6 ISOFORM X2;PUTATIVE LYSOPHOSPHATIDIC ACID PHOSPHATASE TYPE 6	PPA6_MOUSE	LYSOPHOSPHATIDIC ACID PHOSPHATASE TYPE 6, TRANSCRIPT VARIANT X1; LYSOPHOSPHATIDIC ACID PHOSPHATASE TYPE 6, TRANSCRIPT VARIANT X2
7547	PORTHOMCL7547[AjBfCgCiDrLvMmOjOlSpXl|(12 genes, 11 taxa)]:	0	0	-0.503132	0.164461	0.0605392	0.701588	-0.843377	-0.157425	-0.820029	-0.745243	-0.449142	-0.671471			DAXX	DAXX.L;DAXX	DAXX	DAXX	DEATH DOMAIN-ASSOCIATED PROTEIN 6-LIKE;LOC100184540		DAXX_MOUSE	PUTATIVE DEATH DOMAIN-ASSOCIATED PROTEIN 6	DAXX_MOUSE	DEATH DOMAIN-ASSOCIATED PROTEIN 6-LIKE
15006	PORTHOMCL15006[AjLvOjSp|(4 genes, 4 taxa)]:	0	0	0	0	0	0	0	0	-0.645971	-0.772116	-0.596201	-0.671429										PUTATIVE RESISTANCE TO INHIBITORS OF CHOLINESTERASE PROTEIN 3	RIC3_CAEEL	RESISTANCE TO INHIBITORS OF CHOLINESTERASE PROTEIN 3
5567	PORTHOMCL5567[AjBfCgCiDrGgLvMmOjOlPsSpXl|(14 genes, 13 taxa)]:	-0.0778571	-0.577451	-0.739451	0.408848	0.160662	0.0106471	-0.742662	0	-0.803647	-0.83356	-0.376348	-0.671185	MKS1	MKS1	MKS1	MKS1.L;MKS1	MKS1	MKS1	MECKEL SYNDROME TYPE 1 PROTEIN-LIKE, TRANSCRIPT VARIANT X2; MECKEL SYNDROME TYPE 1 PROTEIN-LIKE, TRANSCRIPT VARIANT X1;MKS1	MKS1	MKS1_MOUSE;MKS1	PUTATIVE MECKEL SYNDROME TYPE 1 PROTEIN ISOFORM X3;MECKEL SYNDROME TYPE 1 PROTEIN;MKS1	MKS1_HUMAN;MKS1	MECKEL SYNDROME TYPE 1 PROTEIN, TRANSCRIPT VARIANT X1; MECKEL SYNDROME TYPE 1 PROTEIN, TRANSCRIPT VARIANT X2; MECKEL SYNDROME TYPE 1 PROTEIN, TRANSCRIPT VARIANT X3;MKS1
2401	PORTHOMCL2401[AjCgCiGgLvMmOjOlPsSpXl|(20 genes, 11 taxa)]:	-0.749341	-0.783868	-0.938022	-0.188873	-0.732672	0	-0.580701	0	-0.663559	-0.875851	-0.47402	-0.671143	PBRM1	PBRM1	PBRM1	LOC108705353;PBRM1	PBRM1;PBRM1L		PROTEIN POLYBROMO-1, TRANSCRIPT VARIANT X1; PROTEIN POLYBROMO-1, TRANSCRIPT VARIANT X2		PB1_HUMAN;PBRM1	HYPOTHETICAL PROTEIN	PB1_HUMAN;PB1_MOUSE;PBRM1	PROTEIN POLYBROMO-1, TRANSCRIPT VARIANT X2; PROTEIN POLYBROMO-1, TRANSCRIPT VARIANT X8; PROTEIN POLYBROMO-1, TRANSCRIPT VARIANT X4; PROTEIN POLYBROMO-1, TRANSCRIPT VARIANT X1; PROTEIN POLYBROMO-1, TRANSCRIPT VARIANT X6; PROTEIN POLYBROMO-1, TRANSCRIPT VARIANT X7; PROTEIN POLYBROMO-1, TRANSCRIPT VARIANT X3; PROTEIN POLYBROMO-1, TRANSCRIPT VARIANT X5
7818	PORTHOMCL7818[AjBfCgCiLvOjOlSpXl|(11 genes, 9 taxa)]:	0	0	0	0.568713	0.508509	0	-0.938714	0.299214	-0.677511	-0.608338	-0.727328	-0.671059				LOC108698330	UNCHARACTERIZED LOC101161666		UNCHARACTERIZED LOC100176859			HYPOTHETICAL PROTEIN		UNCHARACTERIZED LOC100889163
11935	PORTHOMCL11935[AjBfCgLvOjSp|(6 genes, 6 taxa)]:	0	0	0	0	0	0	0	0.417413	-0.648324	-0.68758	-0.676103	-0.670669									IL18R_HUMAN	PUTATIVE MYOSIN HEAVY CHAIN, SKELETAL MUSCLE, ADULT-LIKE	ANKK1_MOUSE	COILED-COIL DOMAIN-CONTAINING PROTEIN 160-LIKE
5358	PORTHOMCL5358[AjBfCgCiDrGgLvMmOjOlPsSpXl|(14 genes, 13 taxa)]:	-0.69	-0.880088	-0.759231	-0.291691	-0.211765	0.287588	-0.762039	-0.408392	-0.578506	-0.828111	-0.604412	-0.670343	KIF4A	KIF4A	KIF4;KIF4A	KIF4A.L;KIF4A	KIF4;KIF4A	KIF4;KIF4A	CHROMOSOME-ASSOCIATED KINESIN KIF4A, TRANSCRIPT VARIANT X1; CHROMOSOME-ASSOCIATED KINESIN KIF4A, TRANSCRIPT VARIANT X2;KIF4A	KIF4A	KIF4_XENLA;KIF4A	HYPOTHETICAL PROTEIN;KIF4A	KIF4_XENLA;KIF4_CHICK	CHROMOSOME-ASSOCIATED KINESIN KIF4
9982	PORTHOMCL9982[AjBfCiLvOjSp|(8 genes, 6 taxa)]:	0	0	0	0	0	0	-0.89787	0.825035	-0.865324	-0.471579	-0.673039	-0.669981							UNCHARACTERIZED LOC100184007			PUTATIVE A-KINASE-INTERACTING PROTEIN 1		A-KINASE-INTERACTING PROTEIN 1, TRANSCRIPT VARIANT X2; A-KINASE-INTERACTING PROTEIN 1, TRANSCRIPT VARIANT X1;A-KINASE-INTERACTING PROTEIN 1
4089	PORTHOMCL4089[AjBfCgCiDrLvMmOjOlPsSpXl|(16 genes, 12 taxa)]:	0	-0.492659	-0.641044	0.354926	0.0647304	0.622088	-0.795753	0.513566	-0.891471	-0.779319	-0.338848	-0.669879		SART1	SART1	SART1.S;SART1	SART1	SART1	U4/U6.U5 TRI-SNRNP-ASSOCIATED PROTEIN 1-LIKE, TRANSCRIPT VARIANT X2; U4/U6.U5 TRI-SNRNP-ASSOCIATED PROTEIN 1-LIKE, TRANSCRIPT VARIANT X1	SART1	SNUT1_HUMAN	PUTATIVE U4/U6.U5 TRI-SNRNP-ASSOCIATED PROTEIN 1;SART1	SNUT1_HUMAN;SART1	U4/U6.U5 TRI-SNRNP-ASSOCIATED PROTEIN 1;U4/U6.U5 TRI-SNRNP-ASSOCIATED PROTEIN 1-LIKE;SART1
2792	PORTHOMCL2792[AjBfCgCiDrGgLvMmOjOlPsSpXl|(18 genes, 13 taxa)]:	-0.63511	-0.656879	-0.782143	-0.00257353	-0.389485	0.166324	-0.463506	-0.50668	-0.785559	-0.566997	-0.656985	-0.669847	RBM39	RBM39	RBM39	RBM39.L;MGC81970;RBM39	RBM39B;RNA-BINDING PROTEIN 39	RBM39A;RBM39B;RBM39	RNA-BINDING PROTEIN 39-LIKE, TRANSCRIPT VARIANT X4; RNA-BINDING PROTEIN 39-LIKE, TRANSCRIPT VARIANT X7; RNA-BINDING PROTEIN 39-LIKE, TRANSCRIPT VARIANT X9; RNA-BINDING PROTEIN 39-LIKE, TRANSCRIPT VARIANT X3; RNA-BINDING PROTEIN 39-LIKE, TRANSCRIPT VARIANT X1; RNA-BINDING PROTEIN 39-LIKE, TRANSCRIPT VARIANT X2; RNA-BINDING PROTEIN 39-LIKE, TRANSCRIPT VARIANT X8; RNA-BINDING PROTEIN 39-LIKE, TRANSC…	RBM23	RBM39_HUMAN;RBG2_ARATH;RBM39	PUTATIVE RNA-BINDING PROTEIN 39-LIKE;PUTATIVE RNA-BINDING PROTEIN 39-LIKE ISOFORM X4;RBM39	RBM39_PONAB	RNA-BINDING PROTEIN 39;RBM23
2643	PORTHOMCL2643[AjBfCgCiDrGgLvMmOjOlPsSpXl|(19 genes, 13 taxa)]:	0.00884615	-0.772	0.945385	-0.303456	-0.406152	-0.292824	-0.0905195	-0.107551	-0.869235	-0.426935	-0.713113	-0.669761	LACE1	LACE1;AFG1L	LACE1;AFG1L	LACE1.L;AFG1L	AFG1LA;AFG1LB	LACE1A;LACE1B;AFG1L	3-KETOSTEROID-9-ALPHA-MONOOXYGENASE OXYGENASE SUBUNIT-LIKE, TRANSCRIPT VARIANT X1; 3-KETOSTEROID-9-ALPHA-MONOOXYGENASE OXYGENASE SUBUNIT-LIKE, TRANSCRIPT VARIANT X4; 3-KETOSTEROID-9-ALPHA-MONOOXYGENASE OXYGENASE SUBUNIT-LIKE, TRANSCRIPT VARIANT X3; 3-KETOSTEROID-9-ALPHA-MONOOXYGENASE OXYGENASE SUBUNIT-LIKE		LACE1_MOUSE	PUTATIVE LACTATION ELEVATED PROTEIN 1;HYPOTHETICAL PROTEIN	YLAT2_HUMAN	LACTATION ELEVATED PROTEIN 1
3908	PORTHOMCL3908[AjBfCgCiDrGgLvMmOjOlPsSpXl|(16 genes, 13 taxa)]:	-0.523352	-0.0472527	-0.220385	-0.223284	-0.582353	0.6765	-0.838571	-0.843007	-0.866735	-0.40677	-0.735417	-0.669641	EIF4E2	EIF4E2	EIF4E2	MGC116437;LOC108718046	EIF4E2	EIF4E2;EIF4E2RS1	EUKARYOTIC TRANSLATION INITIATION FACTOR 4E TYPE 2-LIKE;EIF4E2	EIF4E2	IF4E2_MOUSE;EIF4E2	EUKARYOTIC TRANSLATION INITIATION FACTOR 4E MEMBER 2;EIF4E2	IF4E2_MOUSE;EIF4E2	EUKARYOTIC TRANSLATION INITIATION FACTOR 4E MEMBER 2;EIF4E2
2535	PORTHOMCL2535[AjBfCgCiDrGgLvMmOjOlPsSpXl|(19 genes, 13 taxa)]:	-0.481758	-0.678681	-0.507473	-0.253725	-0.459608	-0.0287941	-0.714364	0.793706	-0.913882	-0.409102	-0.683701	-0.668895	NAT10	NAT10	NAT10	NAT10.L;NAT10	NAT10	NAT10	RNA CYTIDINE ACETYLTRANSFERASE;NAT10	NAT10	NAT10_MOUSE	PUTATIVE N-ACETYLTRANSFERASE 10;PUTATIVE N-ACETYLTRANSFERASE 10-LIKE;HYPOTHETICAL PROTEIN;NAT10	NAT10_HUMAN	N-ACETYLTRANSFERASE 10;NAT10
3406	PORTHOMCL3406[AjBfCgCiDrGgLvMmOjOlPsSpXl|(17 genes, 13 taxa)]:	-0.276044	-0.73156	-0.552088	-0.379093	-0.261324	0.322176	-0.732169	-0.756988	-0.696059	-0.578535	-0.729779	-0.668124	BOP1	PLRG1	BOP1	BOP1.S;BOP1.L;BOP1	BOP1	BOP1	RIBOSOME BIOGENESIS PROTEIN BOP1-A-LIKE;BOP1	BOP1	BOP1A_XENLA;BOP1	PUTATIVE RIBOSOME BIOGENESIS PROTEIN BOP1-B;BOP1	BOP1B_XENLA;BOP1	RIBOSOME BIOGENESIS PROTEIN BOP1-B;BOP1
4849	PORTHOMCL4849[AjBfCgCiDrGgLvMmOjOlPsSpXl|(15 genes, 13 taxa)]:	-0.461209	-0.474549	0.654231	0.748309	0.698971	0.515324	-0.64613	-0.587325	-0.711941	-0.789102	-0.503186	-0.668077	MKRN1	MKRN1	MKRN1;MKRN3	MKRN1.S;LOC108710734;MKRN1	MKRN1	MKRN1	ZINC FINGER PROTEIN ZF(C3H/RING)-1		MKRN1_MACEU;MKRN1	PUTATIVE E3 UBIQUITIN-PROTEIN LIGASE MAKORIN-1;MKRN1	MKRN1_MACEU	PROBABLE E3 UBIQUITIN-PROTEIN LIGASE MAKORIN-1
2858	PORTHOMCL2858[AjBfCgCiDrLvMmOjOlSpXl|(18 genes, 11 taxa)]:	0	0	-0.550549	-0.664681	0.0168627	0.0222353	-0.696299	-0.660596	-0.593235	-0.690175	-0.720711	-0.668041			PRMT5	PRMT5.L;PRMT5.S;PRMT5	PRMT5	PRMT5	PROTEIN ARGININE N-METHYLTRANSFERASE 5-LIKE;PRMT5	PRMT5	ANM5_HUMAN;PRMT5	HYPOTHETICAL PROTEIN;PRMT5	ANM5_HUMAN;PRMT5	PROTEIN ARGININE N-METHYLTRANSFERASE 5-LIKE;PRMT5
2815	PORTHOMCL2815[AjBfDrGgLvMmOjOlPsSpXl|(18 genes, 11 taxa)]:	-0.616429	-0.402549	-0.465769	0.0433578	0.0140447	-0.790471	0	-0.745441	-0.731559	-0.748999	-0.523039	-0.667866	GPC4	GPC2	GPC4;GPC2;GM43720	GPC4.L;LOC108708487	GPC6B;GPC2	GPC6B;GPC2;GPC6		GPC6	GPC6_PONAB	PUTATIVE GLYPICAN-4	GPC6_HUMAN	GLYPICAN-6
5730	PORTHOMCL5730[AjBfCgCiDrGgLvMmOjOlPsSpXl|(14 genes, 13 taxa)]:	-0.506209	-0.812835	0.462967	-0.071152	0.312451	-0.461939	-0.75213	-0.43917	-0.831206	-0.762332	-0.408578	-0.667372	FAM161A	FAM161A	FAM161A	FAM161A.L;FAM161A	FAM161A;PROTEIN FAM161A-LIKE	FAM161A	PROTEIN FAM161B		F161A_XENTR;FAM161A	HYPOTHETICAL PROTEIN	F161A_XENTR	PROTEIN FAM161B;FAM161A
1492	PORTHOMCL1492[AjBfCgCiDrGgLvMmOjOlPsSpXl|(24 genes, 13 taxa)]:	-0.596978	-0.499824	-0.668956	0.0180192	0.281029	0.856235	-0.774234	0.693338	-0.63749	-0.757131	-0.607475	-0.667366	STK38;CIT	CDC42BPB	CIT	CIT.S;CIT	CITB;CITA	STK38A;STK38B;FO818716.1;STK38;CIT	CITRON RHO-INTERACTING KINASE-LIKE, TRANSCRIPT VARIANT X2; CITRON RHO-INTERACTING KINASE-LIKE, TRANSCRIPT VARIANT X1;LOC100186229		CTRO_MOUSE	PUTATIVE CITRON RHO-INTERACTING KINASE;PUTATIVE SERINE/THREONINE-PROTEIN KINASE TRICORNER;CIT;STK38L	CTRO_MOUSE;CTRO_HUMAN;CIT	CITRON RHO-INTERACTING KINASE
2779	PORTHOMCL2779[AjBfCgCiDrGgLvMmOjOlSpXl|(18 genes, 12 taxa)]:	-0.28511	0	-0.0177473	-0.686446	0.0430147	-0.678206	-0.736325	0.224895	-0.511735	-0.788627	-0.701716	-0.667359			NOMO1	NOMO3.L;LOC108703113	NOMO	NOMO	NODAL MODULATOR 1		NOMO2_HUMAN	PUTATIVE NODAL MODULATOR 1	NOMO2_HUMAN;NOMO1_MOUSE;NOMO1_HUMAN	NODAL MODULATOR 1
6973	PORTHOMCL6973[BfCiDrGgLvMmOjOlPsSpXl|(13 genes, 11 taxa)]:	-0.483846	-0.705934	-0.564505	-0.209093	-0.403897	0.111706	-0.771338	0.700629	-0.864735	-0.529845	-0.60527	-0.666617	NCL	NCL	NCL	NCL.S;NCL	NCL;NUCLEOLIN-LIKE	NCL	NUCLEOLIN LIKE PROTEIN CIRGG1		NUCL_XENLA		NUCL_CHICK	NUCLEOLIN, TRANSCRIPT VARIANT X1; NUCLEOLIN, TRANSCRIPT VARIANT X2; NUCLEOLIN, TRANSCRIPT VARIANT X3
2403	PORTHOMCL2403[AjBfCgCiDrGgLvMmOjOlPsSpXl|(20 genes, 13 taxa)]:	-0.451374	-0.875077	-0.921374	0.343309	-0.360417	-0.00297059	-0.664117	0.498462	-0.847949	-0.788124	-0.361599	-0.665891	C2CD3	C2CD3	C2CD3	LOC108710059;C2CD3		C2CD3	C2 DOMAIN-CONTAINING PROTEIN 3, TRANSCRIPT VARIANT X2; C2 DOMAIN-CONTAINING PROTEIN 3, TRANSCRIPT VARIANT X1;LOC100184665		C2CD3_HUMAN	PUTATIVE C2 DOMAIN-CONTAINING PROTEIN 3;PUTATIVE C2 DOMAIN-CONTAINING PROTEIN 3 ISOFORM X4	C2CD3_XENTR	C2 DOMAIN-CONTAINING PROTEIN 3;C2 DOMAIN-CONTAINING PROTEIN 3-LIKE
8544	PORTHOMCL8544[AjBfCgDrGgLvMmOjSp|(10 genes, 9 taxa)]:	-0.396593	0	-0.842582	0	0	0.199794	0	0.786783	-0.797971	-0.734799	-0.464093	-0.665621	TAF1		TAF1			TAF1		TAF1	TAF1_MESAU;TAF1	PUTATIVE TRANSCRIPTION INITIATION FACTOR TFIID SUBUNIT 1;DYSTONIA 3 (WITH PARKINSONISM)	TAF1_MESAU;TAF1	TRANSCRIPTION INITIATION FACTOR TFIID SUBUNIT 1
1716	PORTHOMCL1716[AjBfCgCiDrGgLvMmOjOlPsSpXl|(23 genes, 13 taxa)]:	-0.0635714	0.0448352	0.940824	-0.27576	0.0183088	0.153059	-0.381039	-0.218349	-0.677735	-0.716883	-0.601349	-0.665323	PAFAH2;PLA2G7	PLA2G7;PAFAH2	PAFAH2;PLA2G7	PLA2G7.L;PAFAH2.L;PLA2G7;PAFAH2	PLA2G7	PLA2G7	PLATELET-ACTIVATING FACTOR ACETYLHYDROLASE 2, CYTOPLASMIC-LIKE, TRANSCRIPT VARIANT X1; PLATELET-ACTIVATING FACTOR ACETYLHYDROLASE 2, CYTOPLASMIC-LIKE, TRANSCRIPT VARIANT X2;PLA2G7	PLA2G7	PAFA_CHICK;PLA2G7	PUTATIVE PLATELET-ACTIVATING FACTOR ACETYLHYDROLASE-LIKE;PLATELET-ACTIVATING FACTOR ACETYLHYDROLASE;PLA2G7	PAFA_CAVPO;PAFA_CHICK	PLATELET-ACTIVATING FACTOR ACETYLHYDROLASE, TRANSCRIPT VARIANT X5; PLATELET-ACTIVATING FACTOR ACETYLHYDROLASE, TRANSCRIPT VARIANT X4; PLATELET-ACTIVATING FACTOR ACETYLHYDROLASE, TRANSCRIPT VARIANT X1; PLATELET-ACTIVATING FACTOR ACETYLHYDROLASE, TRANSCRIPT VARIANT X3; PLATELET-ACTIVATING FACTOR ACETYLHYDROLASE, TRANSCRIPT VARIANT X2;PLATELET-ACTIVATING FACTOR ACETYLHYDROLASE;PLATELET-ACTIVATING FA…
3612	PORTHOMCL3612[AjBfCgCiDrGgLvMmOjOlPsSpXl|(17 genes, 13 taxa)]:	-0.52033	-0.737846	-0.553022	-0.266642	-0.487157	-0.0907941	-0.809948	0.316573	-0.313647	-0.918246	-0.763848	-0.665247	PUM3	KIAA0020;PUM3	PUM3	PUM3.S;PUM3.L;PUM3	PUM3	PUM3	PUMILIO HOMOLOG 3, TRANSCRIPT VARIANT X1; PUMILIO HOMOLOG 3, TRANSCRIPT VARIANT X2; PUMILIO HOMOLOG 3, TRANSCRIPT VARIANT X3;PUM3	PUM3	PUM3_RAT;PUM3_DANRE	HYPOTHETICAL PROTEIN	PUM3_RAT;PUM3	PUMILIO DOMAIN-CONTAINING PROTEIN KIAA0020 HOMOLOG;PUM3
5424	PORTHOMCL5424[AjBfCgCiDrGgLvMmOjOlPsSpXl|(14 genes, 13 taxa)]:	-0.575714	-0.708879	-0.665989	-0.094951	-0.00723039	0.603588	-0.939831	0.596224	-0.794206	-0.699443	-0.501225	-0.664958	CXORF56	CXORF56	C330007P06RIK	CXORF56.L	ZGC:103697	ZGC:103697	UPF0428 PROTEIN CXORF56 HOMOLOG		CX056_XENTR	PUTATIVE UPF0428 PROTEIN CXORF56-LIKE	CX056_XENTR	UPF0428 PROTEIN CXORF56 HOMOLOG
5194	PORTHOMCL5194[AjBfCgCiDrGgLvMmOjOlPsSpXl|(14 genes, 13 taxa)]:	-0.369121	-0.725495	-0.795	0.272206	-0.0934804	0.565294	-0.803208	0	-0.821824	-0.708277	-0.464461	-0.664854	PPIL2	PPIL2	PPIL2	PPIL2.S;PPIL2	PPIL2	PPIL2	PEPTIDYL-PROLYL CIS-TRANS ISOMERASE-LIKE 2;PPIL2		PPIL2_MOUSE;PPIL2	PUTATIVE PEPTIDYL-PROLYL CIS-TRANS ISOMERASE-LIKE 2-LIKE;PPIL2	PPIL2_MOUSE;PPIL2	PEPTIDYL-PROLYL CIS-TRANS ISOMERASE-LIKE 2;PPIL2
5032	PORTHOMCL5032[BfCgCiDrGgLvMmOjOlPsSpXl|(15 genes, 12 taxa)]:	-0.426209	-0.753099	-0.804945	-0.154975	-0.41076	0.674176	-0.757351	-0.625389	-0.666559	-0.71162	-0.616176	-0.664785	DDX5	DDX17;DDX5	DDX5	DDX5.L	DDX5	DDX5	ATP-DEPENDENT RNA HELICASE DBP2;DEAD-BOX ATP-DEPENDENT RNA HELICASE 20-LIKE		DDX5_MOUSE		DDX17_MOUSE;DDX17	ATP-DEPENDENT RNA HELICASE DBP2;UNCHARACTERIZED LOC100892978;DDX17
6157	PORTHOMCL6157[AjCgCiDrGgLvMmOjOlPsSpXl|(13 genes, 12 taxa)]:	-0.44033	-0.775868	-0.581484	0.105123	0.211471	0.534029	-0.900727	0	-0.599441	-0.81065	-0.583701	-0.664597	ELP3	ELP3	ELP3	ELP3.L;ELP3	ELP3	ELP3	ELONGATOR COMPLEX PROTEIN 3		ELP3_CHICK;ELP3	PUTATIVE ELONGATOR COMPLEX PROTEIN 3;ELP3	ELP3_XENTR;ELP3_CHICK	ELONGATOR COMPLEX PROTEIN 3
2237	PORTHOMCL2237[AjBfCgDrGgLvMmOjOlPsSpXl|(20 genes, 12 taxa)]:	0.0515934	-0.664484	-0.895989	-0.253775	-0.104118	-0.293477	0	-0.278392	-0.792735	-0.738452	-0.460907	-0.664031	CEP162	KIAA1009;CEP162	CEP162	LOC108716877;CEP162	CEP162	CEP162			CE162_HUMAN	PUTATIVE CENTROSOMAL PROTEIN	CE162_HUMAN	CENTROSOMAL PROTEIN OF 162 KDA
455	PORTHOMCL455[AjBfCgCiDrGgLvMmOjOlPsSpXl|(45 genes, 13 taxa)]:	0.703956	-0.424571	-0.74456	0.145025	0.591495	0.5125	-0.872766	-0.758119	-0.684971	-0.835212	-0.471078	-0.663754	MAP4K4;TNIK	MAP4K4;TNIK;MYO3A;NRK;MINK1	TNIK;MINK1;MAP4K4;NRK	MAP4K4-LIKE.S;TNIK.S;MINK1.L;NRK.L;TNIK;MINK1	TNIKA;MITOGEN-ACTIVATED PROTEIN KINASE KINASE KINASE KINASE 4;TNIK (1 OF MANY);MINK1;MAP4K4;MAP4K4 (1 OF MANY)	TNIKA;MINK1;TNIKB;MAP4K4;SI:ZFOS-2326C3.2;TNIK;MAP4K4 (1 OF MANY)	TRAF2 AND NCK-INTERACTING PROTEIN KINASE-LIKE, TRANSCRIPT VARIANT X1; TRAF2 AND NCK-INTERACTING PROTEIN KINASE-LIKE, TRANSCRIPT VARIANT X3; TRAF2 AND NCK-INTERACTING PROTEIN KINASE-LIKE, TRANSCRIPT VARIANT X2; TRAF2 AND NCK-INTERACTING PROTEIN KINASE-LIKE, TRANSCRIPT VARIANT X4	LOC108258915		PUTATIVE MISSHAPEN-LIKE KINASE 1 ISOFORM X1;PUTATIVE MITOGEN-ACTIVATED PROTEIN KINASE KINASE KINASE KINASE 4-LIKE;HYPOTHETICAL PROTEIN	MIG15_CAEEL;M4K4_MOUSE	MISSHAPEN-LIKE KINASE 1, TRANSCRIPT VARIANT X3; MISSHAPEN-LIKE KINASE 1, TRANSCRIPT VARIANT X1; MISSHAPEN-LIKE KINASE 1, TRANSCRIPT VARIANT X2;MITOGEN-ACTIVATED PROTEIN KINASE KINASE KINASE KINASE 4-LIKE
5450	PORTHOMCL5450[AjBfCgDrGgLvMmOjOlPsSpXl|(14 genes, 12 taxa)]:	-0.67489	-0.927604	-0.492363	-0.214284	-0.722328	0.334882	0	0.68986	-0.800206	-0.611146	-0.579902	-0.663751	XRCC3	XRCC3	XRCC3	XRCC3.L;XRCC3	XRCC3	XRCC3		XRCC3	XRCC3_HUMAN;XRCC3	PUTATIVE DNA REPAIR PROTEIN;XRCC3	XRCC3_MOUSE	DNA REPAIR PROTEIN XRCC3;XRCC3
5731	PORTHOMCL5731[AjCgDrGgLvMmOjOlPsSpXl|(14 genes, 11 taxa)]:	-0.273022	0.0695385	-0.585659	0.250141	-0.596814	-0.834147	0	0	-0.699059	-0.753519	-0.53848	-0.663686	ANKRD54	ANKRD54	ANKRD54	ANKRD54.L;ANKRD54.S;ANKRD54	ANKRD54	ANKRD54			ANR54_DANRE;ANKRD54	PUTATIVE ANKYRIN REPEAT DOMAIN-CONTAINING PROTEIN 54 ISOFORM X3	ANR54_DANRE	ANKYRIN REPEAT DOMAIN-CONTAINING PROTEIN 54, TRANSCRIPT VARIANT X2; ANKYRIN REPEAT DOMAIN-CONTAINING PROTEIN 54, TRANSCRIPT VARIANT X3; ANKYRIN REPEAT DOMAIN-CONTAINING PROTEIN 54, TRANSCRIPT VARIANT X1;ANKRD54
5420	PORTHOMCL5420[AjBfCgCiDrGgLvMmOjOlPsSpXl|(14 genes, 13 taxa)]:	-0.376758	-0.690945	-0.417198	-0.794706	0.0213235	-0.713661	-0.266675	-0.203071	-0.921882	-0.389742	-0.678554	-0.663393	COX10	COX10	COX10	COX10.L;COX10.S;COX10	COX10	COX10	PROTOHEME IX FARNESYLTRANSFERASE, MITOCHONDRIAL;COX10	COX10	COX10_MOUSE;COX10	PUTATIVE PROTOHEME IX FARNESYLTRANSFERASE, MITOCHONDRIAL	COX10_MOUSE;COX10	PROTOHEME IX FARNESYLTRANSFERASE, MITOCHONDRIAL;COX10
2624	PORTHOMCL2624[AjBfCgCiDrGgLvMmOjOlPsSpXl|(19 genes, 13 taxa)]:	-0.145495	-0.488967	-0.812857	0.268946	0.362892	0.0829412	-0.780532	-0.239371	-0.690441	-0.771909	-0.527328	-0.663226	DNAJC7	DNAJC7	DNAJC7	DNAJC7.S;DNAJC7.L;DNAJC7	DNAJC7	DNAJC7	DNAJ HOMOLOG SUBFAMILY C MEMBER 7-LIKE	DNAJC7	DNJC7_HUMAN;DNAJC7	PUTATIVE DNAJ-LIKE SUBFAMILY C MEMBER 7;DNAJC7	DNJC7_HUMAN;DNAJC7	DNAJ HOMOLOG SUBFAMILY C MEMBER 7;DNAJC7
5263	PORTHOMCL5263[AjBfCgCiDrGgLvMmOjOlSpXl|(14 genes, 12 taxa)]:	-0.391374	0	0.230659	0.380784	0.184804	-0.0712941	-0.845571	0.086014	-0.540912	-0.819856	-0.628676	-0.663148	KIAA2013		2510039O18RIK	KIAA2013.S;KIAA2013.L	SI:DKEYP-104H9.5	SI:DKEYP-104H9.5	UNCHARACTERIZED PROTEIN KIAA2013 HOMOLOG		K2013_XENTR	HYPOTHETICAL PROTEIN	K2013_XENLA	UNCHARACTERIZED PROTEIN KIAA2013 HOMOLOG
6455	PORTHOMCL6455[AjBfCgCiDrLvMmOjOlPsSpXl|(13 genes, 12 taxa)]:	0	-0.302066	-0.710824	0.458456	-0.587108	0.418971	-0.763506	-0.893968	-0.791029	-0.781094	-0.415931	-0.662685		SNRNP70	SNRNP70	SNRNP70.S;SNRNP70	SNRNP70	SNRNP70	U1 SMALL NUCLEAR RIBONUCLEOPROTEIN 70 KDA-LIKE, TRANSCRIPT VARIANT X2; U1 SMALL NUCLEAR RIBONUCLEOPROTEIN 70 KDA-LIKE, TRANSCRIPT VARIANT X1;SNRNP70	SNRNP70	RU17_XENTR;SNRNP70	PUTATIVE U1 SMALL NUCLEAR RIBONUCLEOPROTEIN 70 KDA;HYPOTHETICAL PROTEIN;SNRNP70	RU17_HUMAN;SNRNP70	U1 SMALL NUCLEAR RIBONUCLEOPROTEIN 70 KDA;SNRNP70
5740	PORTHOMCL5740[AjBfCiDrGgLvMmOjOlPsSpXl|(14 genes, 12 taxa)]:	-0.0999451	-0.271868	-0.0625275	-0.413848	0.174461	0.361471	-0.89313	0.144476	-0.816941	-0.663137	-0.507721	-0.6626	PAK4	PAK4	PAK4;PAK6	LOC108700290;PAK4.L;PAK4	PAK4	PAK4	SERINE/THREONINE-PROTEIN KINASE PAK 4;PAK7		PAK4_MOUSE;PAK4	PUTATIVE SERINE/THREONINE-PROTEIN KINASE PAK 4 ISOFORM X1	PAK7_MOUSE;PAK4	SERINE/THREONINE-PROTEIN KINASE PAK 4, TRANSCRIPT VARIANT X5; SERINE/THREONINE-PROTEIN KINASE PAK 4, TRANSCRIPT VARIANT X1; SERINE/THREONINE-PROTEIN KINASE PAK 4, TRANSCRIPT VARIANT X2; SERINE/THREONINE-PROTEIN KINASE PAK 4, TRANSCRIPT VARIANT X3; SERINE/THREONINE-PROTEIN KINASE PAK 4, TRANSCRIPT VARIANT X4;PAK4
4714	PORTHOMCL4714[AjBfCgCiDrGgLvMmOjOlPsSpXl|(15 genes, 13 taxa)]:	-0.433132	-0.506637	-0.582912	0.298766	-0.38674	-0.138647	-0.918104	0.627343	-0.598059	-0.879628	-0.509926	-0.662538	NLK	NLK	NLK	NLK.L;NLK.S	NLK2;NLK	NLK2;NLK1;NLK	NEMO-LIKE KINASE;NLK	NLK	NLK_RAT;NLK	PUTATIVE SERINE/THREONINE-PROTEIN KINASE NLK2 ISOFORM X1;NLK	NLK_HUMAN	SERINE/THREONINE-PROTEIN KINASE NLK, TRANSCRIPT VARIANT X1; SERINE/THREONINE-PROTEIN KINASE NLK, TRANSCRIPT VARIANT X2;NLK
914	PORTHOMCL914[AjBfCgCiDrGgLvMmOjOlPsSpXl|(31 genes, 13 taxa)]:	0.382967	0.156044	0.723681	-0.690515	-0.590662	0.0370882	-0.691273	0.55645	-0.812882	-0.820516	-0.353554	-0.662317	MAN1A1;MAN1C1;MAN1A2	MAN1A2;MAN1A1;MAN1C1	MAN1A2;MAN1A;MAN1C1;MAN1A1	MAN1A2.L;LOC108716798;MAN1C1.L;MAN1C1.S;MAN1A2;MAN1C1	MAN1A2;MAN1A1;SI:CH73-373M9.1;MAN1C1	MAN1A2;MAN1A1;SI:CH73-373M9.1;MAN1C1	MANNOSYL-OLIGOSACCHARIDE 1,2-ALPHA-MANNOSIDASE IA;MAN1A2	MAN1A2	MA1A1_PIG;MA1A2_HUMAN	PUTATIVE MANNOSYL-OLIGOSACCHARIDE 1,2-ALPHA-MANNOSIDASE IB-LIKE;MAN1A2	MA1A2_MOUSE;MA1A2_HUMAN	MANNOSYL-OLIGOSACCHARIDE ALPHA-1,2-MANNOSIDASE ISOFORM B;MANNOSYL-OLIGOSACCHARIDE 1,2-ALPHA-MANNOSIDASE IB-LIKE
4054	PORTHOMCL4054[AjBfCgCiDrGgLvMmOjOlPsSpXl|(16 genes, 13 taxa)]:	-0.32489	-0.742637	-0.710769	-0.69848	-0.873529	-0.412	-0.779584	0.248252	-0.882	-0.44066	-0.663113	-0.661924		ANAPC4	ANAPC4	ANAPC4.L;ANAPC4	ANAPC4	ANAPC4	ANAPHASE-PROMOTING COMPLEX SUBUNIT 4;LOC100186302	ANAPC4	APC4_MOUSE;ANAPC4	PUTATIVE ANAPHASE-PROMOTING COMPLEX SUBUNIT 4-LIKE	APC4_MOUSE	ANAPHASE-PROMOTING COMPLEX SUBUNIT 4;ANAPHASE-PROMOTING COMPLEX SUBUNIT 4-LIKE;ANAPC4
3689	PORTHOMCL3689[AjBfCgDrGgLvOjOlPsSpXl|(16 genes, 11 taxa)]:	-0.329451	0.346505	0	-0.0239216	0.162083	0.428471	0	-0.742577	-0.749853	-0.784293	-0.450368	-0.661505				PHR.L	ZGC:66475	ZGC:66475			PHR_POTTR	DEOXYRIBODIPYRIMIDINE PHOTO-LYASE;CPD PHOTOLYASE;PHOTOLYASE;OLA.95	PHR_POTTR;PHR_CARAU	DEOXYRIBODIPYRIMIDINE PHOTO-LYASE
6284	PORTHOMCL6284[AjBfCgCiDrGgLvMmOjOlPsSpXl|(13 genes, 13 taxa)]:	-0.0565385	-0.830066	-0.900385	-0.162598	-0.202181	-0.174912	-0.852169	0.594196	-0.855206	-0.79453	-0.334559	-0.661432	PPP2R3C	PPP2R3C	PPP2R3C	PPP2R3C.L;PPP2R3C	PPP2R3C	PPP2R3C	SERINE/THREONINE-PROTEIN PHOSPHATASE 2A REGULATORY SUBUNIT B'' SUBUNIT GAMMA;PPP2R3C	PPP2R3C	P2R3C_BOVIN;PPP2R3C	PUTATIVE SERINE/THREONINE-PROTEIN PHOSPHATASE 2A REGULATORY SUBUNIT B'' SUBUNIT GAMMA	P2R3C_BOVIN	SERINE/THREONINE-PROTEIN PHOSPHATASE 2A REGULATORY SUBUNIT B'' SUBUNIT GAMMA;PPP2R3C
2605	PORTHOMCL2605[AjBfCgCiDrGgLvMmOjOlPsSpXl|(19 genes, 13 taxa)]:	-0.354615	-0.642462	-0.471319	-0.848775	-0.127672	-0.914912	-0.89874	0.0348252	-0.834441	-0.589329	-0.560417	-0.661396	EIF2B3	EIF2B3	EIF2B3	EIF2B3.L;EIF2B3	EIF2B3	EIF2B3	TRANSLATION INITIATION FACTOR EIF-2B SUBUNIT GAMMA-LIKE;EIF2B3	EIF2B3	EI2BG_RAT;EI2BG_BOVIN;LOC106174057	HYPOTHETICAL PROTEIN;PUTATIVE TRANSLATION INITIATION FACTOR EIF-2B SUBUNIT GAMMA	EI2BG_RAT;EIF2B3	TRANSLATION INITIATION FACTOR EIF-2B SUBUNIT GAMMA;EIF2B3
4129	PORTHOMCL4129[AjBfCgCiDrGgLvMmOjOlPsSpXl|(16 genes, 13 taxa)]:	-0.368132	-0.618066	-0.552637	-0.917721	-0.000539216	0.311206	-0.810597	-0.0653147	-0.620706	-0.858328	-0.505025	-0.661353	UBLCP1	UBLCP1	UBLCP1	UBLCP1.S;UBLCP1	UBLCP1	UBLCP1;UBLCP1 (1 OF MANY)	UBIQUITIN-LIKE DOMAIN-CONTAINING CTD PHOSPHATASE 1;UBLCP1	UBLCP1	UBCP1_DANRE	PUTATIVE UBIQUITIN-LIKE DOMAIN-CONTAINING CTD PHOSPHATASE 1 ISOFORM X1;UBLCP1	UBCP1_CHICK;UBCP1_DANRE;UBLCP1	UBIQUITIN-LIKE DOMAIN-CONTAINING CTD PHOSPHATASE 1, TRANSCRIPT VARIANT X1; UBIQUITIN-LIKE DOMAIN-CONTAINING CTD PHOSPHATASE 1, TRANSCRIPT VARIANT X2;UBIQUITIN-LIKE DOMAIN-CONTAINING CTD PHOSPHATASE 1;UBLCP1
2552	PORTHOMCL2552[AjCgCiDrGgLvMmOjOlPsSpXl|(19 genes, 12 taxa)]:	-0.628132	-0.855121	-0.730659	-0.0646814	0.0946814	-0.191324	-0.760091	0	-0.772206	-0.579092	-0.63223	-0.661176	PAPOLA;PAPOLG	PAPOLG;PAPOLA	PAPOLG;PAPOLA	PAPOLA.S;PAPOLG.L;PAPOLG	PAPOLG	PAPOLG;PAPOLA	POLY(A) POLYMERASE BETA;PAPOLA		PAPOG_HUMAN;PAPOLG	PUTATIVE POLY(A) POLYMERASE GAMMA	PAPOG_MOUSE;PAPOLG	POLY(A) POLYMERASE GAMMA;PAPOLG
6016	PORTHOMCL6016[BfCgCiDrGgLvMmOjOlPsSpXl|(14 genes, 12 taxa)]:	-0.373297	-0.627648	-0.550659	0.198775	0.161422	0.727118	-0.79274	-0.804825	-0.770912	-0.445986	-0.765441	-0.660779	EMC8	EMC8	EMC8;EMC9	EMC8.S	EMC8	EMC8	ER MEMBRANE PROTEIN COMPLEX SUBUNIT 8/9 HOMOLOG	EMC8	S5A3A_DANRE		EMC8_HUMAN	ER MEMBRANE PROTEIN COMPLEX SUBUNIT 8;EMC8
2350	PORTHOMCL2350[AjBfCgCiDrGgLvMmOjOlPsSpXl|(20 genes, 13 taxa)]:	0.512692	0.483956	0.697637	0.200809	0.894534	0.6755	-0.88261	-0.436267	-0.814794	-0.722642	-0.444485	-0.66064	SLC37A2;SLC37A1	SLC37A1	SLC37A2;SLC37A1	SLC37A2.L;LOC108704935;SLC37A2	SLC37A2;SLC37A1	SLC37A2;SLC37A1	GLUCOSE-6-PHOSPHATE EXCHANGER SLC37A2;SLC37A2		G6PT3_MOUSE	PUTATIVE SUGAR PHOSPHATE EXCHANGER 2 ISOFORM X3;PUTATIVE SUGAR PHOSPHATE EXCHANGER 2;GPP	G6PT3_DANRE	SUGAR PHOSPHATE EXCHANGER 2, TRANSCRIPT VARIANT X7; SUGAR PHOSPHATE EXCHANGER 2, TRANSCRIPT VARIANT X8; SUGAR PHOSPHATE EXCHANGER 2, TRANSCRIPT VARIANT X3; SUGAR PHOSPHATE EXCHANGER 2, TRANSCRIPT VARIANT X6; SUGAR PHOSPHATE EXCHANGER 2, TRANSCRIPT VARIANT X1; SUGAR PHOSPHATE EXCHANGER 2, TRANSCRIPT VARIANT X5; SUGAR PHOSPHATE EXCHANGER 2, TRANSCRIPT VARIANT X2; SUGAR PHOSPHATE EXCHANGER 2, TRANSC…
11117	PORTHOMCL11117[LvMmOjOlPsSpXl|(7 genes, 7 taxa)]:	0	-0.688747	-0.310659	-0.0332353	-0.365196	0	0	0	-0.708353	-0.661085	-0.61152	-0.660319		COPB1	COPB1	COPB1.S	COPB1				COPB_CHICK;COPB1		COPB_CHICK	COATOMER SUBUNIT BETA
6821	PORTHOMCL6821[BfCgCiDrGgLvMmOjOlPsSpXl|(13 genes, 12 taxa)]:	-0.119615	-0.565978	0.497253	0.0160539	-0.485858	-0.354378	-0.572675	0.797694	-0.612206	-0.761775	-0.606863	-0.660281	VWA8	VWA8	VWA8	VWA8.L;VWA8	VWA8	VWA8	VON WILLEBRAND FACTOR A DOMAIN-CONTAINING PROTEIN 8;VWA8		VWA8_DANRE;VWA8		VWA8_HUMAN;VWA8	VON WILLEBRAND FACTOR A DOMAIN-CONTAINING PROTEIN 8;VON WILLEBRAND FACTOR A DOMAIN-CONTAINING PROTEIN 8-LIKE;VWA8
10827	PORTHOMCL10827[AjDrLvOjSpXl|(7 genes, 6 taxa)]:	0	0	0	-0.380131	0	-0.729916	0	0	-0.770147	-0.680351	-0.530147	-0.660215				BMPR2.S		BMPR2A			BMPR2_MOUSE	BONE MORPHOGENETIC PROTEIN RECEPTOR TYPE-2;PUTATIVE BONE MORPHOGENETIC PROTEIN RECEPTOR TYPE-2	BMPR2_HUMAN	BONE MORPHOGENETIC PROTEIN RECEPTOR TYPE-2;BMPR2
3795	PORTHOMCL3795[AjBfCgCiDrGgLvMmOjOlPsSpXl|(16 genes, 13 taxa)]:	-0.430879	-0.863253	-0.530989	0.44	-0.181765	0.751118	-0.853169	-0.889909	-0.754941	-0.60904	-0.615481	-0.659821	TBC1D31	WDR67;TBC1D31	TBC1D31	TBC1D31.L;TBC1D31	TBC1D31	TBC1D31	TBC1 DOMAIN FAMILY MEMBER 31;TBC1D31	TBC1D31	TBC31_XENTR;TBC1D31	PUTATIVE TBC1 DOMAIN FAMILY MEMBER 31-LIKE	TBC31_XENTR;TBC31_PONAB;TBC1D31	TBC1 DOMAIN FAMILY MEMBER 31
17107	PORTHOMCL17107[LvOjSp|(3 genes, 3 taxa)]:	0	0	0	0	0	0	0	0	-0.696294	-0.7716	-0.511275	-0.659723									EFC14_MOUSE		EFC14_MOUSE	UNCHARACTERIZED LOC579014
2000	PORTHOMCL2000[AjBfCgCiDrGgLvMmOjOlPsSpXl|(21 genes, 13 taxa)]:	0.348846	-0.558462	-0.245769	0.281299	0.383333	0.701529	-0.790286	-0.258252	-0.771471	-0.742234	-0.464461	-0.659388	ZDHHC14;ZDHHC18	ZDHHC14;ZDHHC18	ZDHHC14;ZDHHC18	LOC108717854;ZDHHC14	ZDHHC14;ZDHHC18A;ZDHHC18 (1 OF MANY)	ZDHHC18A;ZDHHC14;ZDHHC18B	PALMITOYLTRANSFERASE ZDHHC9		ZDH14_MOUSE	PUTATIVE PALMITOYLTRANSFERASE ZDHHC18 ISOFORM X2	ZDH18_MOUSE;ZDH14_MOUSE;ZDHHC9	PALMITOYLTRANSFERASE ZDHHC18, TRANSCRIPT VARIANT X2; PALMITOYLTRANSFERASE ZDHHC18, TRANSCRIPT VARIANT X1
3383	PORTHOMCL3383[AjBfCgCiDrGgLvMmOjOlSpXl|(17 genes, 12 taxa)]:	-0.17533	0	-0.662253	-0.108676	-0.731299	0.0167219	-0.708818	-0.891448	-0.737529	-0.785363	-0.455091	-0.659328	AASDH		AASDH	AASDH.L;AASDH	AASDH	AASDH	ACYL-COA SYNTHETASE FAMILY MEMBER 4, TRANSCRIPT VARIANT X2; ACYL-COA SYNTHETASE FAMILY MEMBER 4, TRANSCRIPT VARIANT X1;UNCHARACTERIZED LOC108949712, TRANSCRIPT VARIANT X3; UNCHARACTERIZED LOC108949712, TRANSCRIPT VARIANT X2; UNCHARACTERIZED LOC108949712, TRANSCRIPT VARIANT X1	AASDH	ACSF4_HUMAN;AASDH	PUTATIVE ACYL-COA SYNTHETASE FAMILY MEMBER 4-LIKE	ACSF4_HUMAN;AASDH	ACYL-COA SYNTHETASE FAMILY MEMBER 4-LIKE
993	PORTHOMCL993[AjBfCgCiDrGgLvMmOjOlPsSpXl|(29 genes, 13 taxa)]:	-0.383407	-0.604132	-0.674505	0.360858	0.105392	0.4515	-0.842844	0.0794861	-0.538206	-0.773705	-0.664828	-0.658913	RNGTT;DUSP11	DUSP11;RNGTT	DUSP11;RNGTT	DUSP11.L;DUSP11.S;DUSP11	DUSP11;RNGTT	DUSP11;RNGTT	RNA/RNP COMPLEX-1-INTERACTING PHOSPHATASE, TRANSCRIPT VARIANT X1; RNA/RNP COMPLEX-1-INTERACTING PHOSPHATASE, TRANSCRIPT VARIANT X3; RNA/RNP COMPLEX-1-INTERACTING PHOSPHATASE, TRANSCRIPT VARIANT X4; RNA/RNP COMPLEX-1-INTERACTING PHOSPHATASE, TRANSCRIPT VARIANT X2;MRNA-CAPPING ENZYME-LIKE;RNA/RNP COMPLEX-1-INTERACTING PHOSPHATASE-LIKE;RNGTT	RNGTT	DUS11_MOUSE;MCE1_DANRE;RNGTT	HYPOTHETICAL PROTEIN;PUTATIVE MRNA-CAPPING ENZYME;RNGTT	MCE1_MOUSE;DUS11_HUMAN;RNGTT	RNA/RNP COMPLEX-1-INTERACTING PHOSPHATASE;MRNA-CAPPING ENZYME;DUSP11;RNGTT
1641	PORTHOMCL1641[AjBfDrGgLvMmOjOlPsSpXl|(23 genes, 11 taxa)]:	0.14011	-0.176571	-0.117033	-0.55214	-0.616057	-0.747926	0	-0.374406	-0.600588	-0.702064	-0.673897	-0.65885	ST6GALNAC3	ST6GALNAC3;ST6GALNAC4	ST6GALNAC4;ST6GALNAC3	ST6GALNAC3.L;ST6GALNAC3	ST6GALNAC3	ST6GALNAC3		ST6GALNAC4	SIA7E_MOUSE;SIA7D_HUMAN	ST8 ALPHA-N-ACETYL-NEURAMINIDE ALPHA-2,8-SIALYLTRANSFERASE 3;PUTATIVE ALPHA-N-ACETYLGALACTOSAMINIDE ALPHA-2,6-SIALYLTRANSFERASE 3-LIKE ISOFORM X3;ALPHA-N-ACETYLGALACTOSAMINIDE ALPHA-2,6-SIALYLTRANSFERASE 3;PUTATIVE ALPHA-N-ACETYLGALACTOSAMINIDE ALPHA-2,6-SIALYLTRANSFERASE 5-LIKE ISOFORM X2	SIA7D_HUMAN;SIA7E_MOUSE	ALPHA-N-ACETYL-NEURAMINYL-2,3-BETA-GALACTOSYL-1,3-N-ACETYL-GALACTOSAMINIDE ALPHA-2,6-SIALYLTRANSFERASE, TRANSCRIPT VARIANT X1; ALPHA-N-ACETYL-NEURAMINYL-2,3-BETA-GALACTOSYL-1,3-N-ACETYL-GALACTOSAMINIDE ALPHA-2,6-SIALYLTRANSFERASE, TRANSCRIPT VARIANT X2;UNCHARACTERIZED LOC586641, TRANSCRIPT VARIANT X2; UNCHARACTERIZED LOC586641, TRANSCRIPT VARIANT X1
5181	PORTHOMCL5181[AjBfCgCiDrLvMmOjOlPsSpXl|(14 genes, 12 taxa)]:	0	0.481714	-0.174286	0.12	-0.0558824	0.562676	-0.851442	0.485245	-0.932441	-0.738246	-0.302696	-0.657794		C19ORF47	2310022A10RIK	C19ORF47.L;MGC130975	SI:CH211-160D20.3	SI:CH211-160D20.3	UNCHARACTERIZED PROTEIN C19ORF47 HOMOLOG, TRANSCRIPT VARIANT X2; UNCHARACTERIZED PROTEIN C19ORF47 HOMOLOG, TRANSCRIPT VARIANT X1		CS047_HUMAN	HYPOTHETICAL PROTEIN	CS047_RAT	UNCHARACTERIZED PROTEIN C19ORF47 HOMOLOG, TRANSCRIPT VARIANT X3; UNCHARACTERIZED PROTEIN C19ORF47 HOMOLOG, TRANSCRIPT VARIANT X1; UNCHARACTERIZED PROTEIN C19ORF47 HOMOLOG, TRANSCRIPT VARIANT X2
3583	PORTHOMCL3583[AjBfCgCiDrLvMmOjOlPsSpXl|(17 genes, 12 taxa)]:	0	0.382549	0.259286	-0.279779	0.38826	0.229735	0	0.849161	-0.675147	-0.817234	-0.48076	-0.657714		MGAT1	MGAT1	MGAT1.L	MGAT1A;MGAT1B	MGAT1A;MGAT1B	ALPHA-1,3-MANNOSYL-GLYCOPROTEIN 2-BETA-N-ACETYLGLUCOSAMINYLTRANSFERASE-LIKE	MGAT1	MGAT1_MOUSE;MGAT1	PUTATIVE ALPHA-1,3-MANNOSYL-GLYCOPROTEIN 2-BETA-N-ACETYLGLUCOSAMINYLTRANSFERASE;ALPHA-1,3-MANNOSYL-GLYCOPROTEIN 2-BETA-N-ACETYLGLUCOSAMINYLTRANSFERASE	MGAT1_RAT	ALPHA-1,3-MANNOSYL-GLYCOPROTEIN 2-BETA-N-ACETYLGLUCOSAMINYLTRANSFERASE
3639	PORTHOMCL3639[AjBfCgCiDrGgLvMmOjOlPsSpXl|(17 genes, 13 taxa)]:	-0.849835	-0.899385	-0.61978	0.484559	0.398946	0.773382	-0.898545	-0.377063	-0.559235	-0.728194	-0.685662	-0.657697	CAPRIN1	CAPRIN1	CAPRIN1	CAPRIN1.S;CAPRIN1.L;CAPRIN1	CAPRIN1B;CAPRIN1A;CAPRIN1	CAPRIN1B;CAPRIN1A;CAPRIN1	UNCHARACTERIZED LOC100179738		CAPR2_HUMAN	RNA GRANULE PROTEIN INVERTEBRATE	CAPR1_BOVIN	RNA GRANULE PROTEIN INVERTEBRATE
6308	PORTHOMCL6308[AjBfCgCiDrLvMmOjOlPsSpXl|(13 genes, 12 taxa)]:	0	0.208527	-0.773516	-0.22125	-0.424779	-0.806294	-0.732935	0.36007	-0.330059	-0.855686	-0.787255	-0.657667		C19ORF52;TIMM29	TIMM29	C19ORF52.S;C19ORF52.L;TIMM29	TIMM29	TIMM29	UNCHARACTERIZED PROTEIN C19ORF52-LIKE		CS052_HUMAN	HYPOTHETICAL PROTEIN	CS052_HUMAN	UNCHARACTERIZED PROTEIN C19ORF52-LIKE
4080	PORTHOMCL4080[AjBfCgCiDrGgLvMmOjOlPsSpXl|(16 genes, 13 taxa)]:	-0.450495	-0.863516	-0.583516	0.316103	-0.0373529	0.172647	-0.785	-0.480384	-0.878	-0.743839	-0.351103	-0.657647	SMC5	SMC5	SMC5	SMC5.S	SMC5	SMC5	STRUCTURAL MAINTENANCE OF CHROMOSOMES PROTEIN 5-LIKE		SMC5_CHICK	PUTATIVE STRUCTURAL MAINTENANCE OF CHROMOSOMES PROTEIN 5-LIKE	SMC5_HUMAN	STRUCTURAL MAINTENANCE OF CHROMOSOMES PROTEIN 5;STRUCTURAL MAINTENANCE OF CHROMOSOMES PROTEIN 5-LIKE
3192	PORTHOMCL3192[AjBfCgCiDrGgLvMmOjOlPsSpXl|(17 genes, 13 taxa)]:	-0.343407	-0.577934	-0.546593	0.128995	0.0588235	-0.227324	0.110091	0.61274	-0.8305	-0.58192	-0.560172	-0.65753	SMG8	SMG8	SMG8	LOC108708313;SMG8.S;SMG8	SMG8	SMG8	PROTEIN SMG8-LIKE	SMG8	SMG8_XENTR;SMG8	HYPOTHETICAL PROTEIN	SMG8_XENTR	PROTEIN SMG8
1188	PORTHOMCL1188[AjBfCgCiDrGgLvMmOjOlPsSpXl|(27 genes, 13 taxa)]:	-0.0901099	-0.327121	0.0351099	-0.472426	-0.141863	0.0806628	-0.780338	-0.0588112	-0.935824	-0.664995	-0.371569	-0.657462	DIAPH3;DIAPH1	DIAPH3;DIAPH1;DIAPH2	DIAPH2;DIAPH1;DIAPH3	LOC108708510;LOC108698412;DIAPH1.L;DIAPH3;DIAPH2	DIAPH3;DIAPH2;DIAPH1	DIAPH2;DIAPH3	PROTEIN DIAPHANOUS HOMOLOG 2-LIKE;DIAPH2		DIAP3_MOUSE	HYPOTHETICAL PROTEIN;DIAPH1	DIAP3_MOUSE	PROTEIN DIAPHANOUS HOMOLOG 2;PROTEIN DIAPHANOUS HOMOLOG 2-LIKE
3205	PORTHOMCL3205[AjBfCgCiDrGgLvMmOjOlPsSpXl|(17 genes, 13 taxa)]:	-0.389176	-0.298989	-0.690495	0.391324	-0.338407	0.470706	-0.435078	0.790699	-0.475382	-0.743467	-0.753186	-0.657345	RBM22	RBM22	RBM22	RBM22.S;RBM22	RBM22	RBM22	ZINC FINGER PROTEIN;RBM22	RBM22	RBM22_XENLA;RBM22_DANRE	PUTATIVE PRE-MRNA-SPLICING FACTOR RBM22-LIKE;PRE-MRNA-SPLICING FACTOR RBM22;HYPOTHETICAL PROTEIN	RBM22_CHICK	PRE-MRNA-SPLICING FACTOR RBM22;RBM22
6501	PORTHOMCL6501[AjBfCiDrLvMmOjOlPsSpXl|(13 genes, 11 taxa)]:	0	-0.315033	-0.589231	-0.100319	-0.650025	0.0565588	-0.795883	0.496508	-0.753118	-0.462188	-0.754779	-0.656695		TIMM50	TIMM50	TIMM50.L;TIMM50.S;TIMM50	TIMM50	TIMM50	MITOCHONDRIAL IMPORT INNER MEMBRANE TRANSLOCASE SUBUNIT TIM50-LIKE	TIMM50	TIM50_DANRE;TIMM50	PUTATIVE MITOCHONDRIAL IMPORT INNER MEMBRANE TRANSLOCASE SUBUNIT TIM50;TIMM50	TIM50_DANRE;TIMM50	MITOCHONDRIAL IMPORT INNER MEMBRANE TRANSLOCASE SUBUNIT TIM50;TIMM50
474	PORTHOMCL474[AjBfCgCiDrGgLvMmOjOlPsSpXl|(44 genes, 13 taxa)]:	-0.357967	-0.853846	-0.869011	0.367132	-0.433725	0.640824	-0.756558	0	-0.903735	-0.799876	-0.265196	-0.656269	ZMYM4;ZMYM3;ZMYM2	ZMYM3;ZMYM4;ZMYM2	ZMYM4;ZMYM3;ZMYM6;ZMYM2;ZMYM5	ZMYM4.S;ZMYM4.L;ZMYM3.L;ZMYM2.L;ZMYM2.S;ZMYM4;ZMYM3;ZMYM2	SI:CH211-173P18.3;ZMYM2	ZMYM4;ZMYM2;SI:CH211-266O15.1;SI:CH211-173P18.3	ZINC FINGER MYM-TYPE PROTEIN 3-LIKE;UNCHARACTERIZED PROTEIN KIAA1958-LIKE		ZMYM3_MOUSE	PUTATIVE ZINC FINGER MYM-TYPE PROTEIN 3;PUTATIVE ZINC FINGER MYM-TYPE PROTEIN 2	ZMYM4_MOUSE	ZINC FINGER MYM-TYPE PROTEIN 3
1865	PORTHOMCL1865[AjBfCgCiDrGgLvMmOjOlPsSpXl|(22 genes, 13 taxa)]:	0.129725	0.138549	0.697143	-0.46473	-0.0953676	0.0877353	-0.883312	0	-0.578412	-0.832425	-0.557843	-0.656227	MCU;MCUB	MCU;CCDC109B;MCUB	MCU;MCUB	MCU.L;MCU.S;CCDC109B.L;MCU;MCUB	MCU;MCUB;CALCIUM UNIPORTER PROTEIN, MITOCHONDRIAL-LIKE	MCU	CALCIUM UNIPORTER PROTEIN, MITOCHONDRIAL;MCU	MCU	MCU_DANRE;MCU	PUTATIVE CALCIUM UNIPORTER PROTEIN, MITOCHONDRIAL	MCU_DANRE	CALCIUM UNIPORTER PROTEIN, MITOCHONDRIAL;MCU
11154	PORTHOMCL11154[LvMmOjOlPsSpXl|(7 genes, 7 taxa)]:	0	-0.80844	-0.545769	0.12473	-0.208382	0	0	0	-0.887794	-0.615173	-0.465701	-0.656223		CPSF3L;INTS11	INTS11	LOC108696560;INTS11	INTS11;CPSF3L				INT11_CHICK		INT11_DANRE	UNCHARACTERIZED LOC763955
5324	PORTHOMCL5324[AjBfCgCiDrGgLvMmOjPsSpXl|(14 genes, 12 taxa)]:	0.472912	-0.575297	-0.736593	0.755368	0	0.297059	-0.793779	-0.796564	-0.4185	-0.816388	-0.733676	-0.656188	CCDC57	CCDC57	CCDC57	LOC108700999;CCDC57		CCDC57	COILED-COIL DOMAIN-CONTAINING PROTEIN 57-LIKE		CCD57_MOUSE	PUTATIVE COILED-COIL DOMAIN-CONTAINING PROTEIN	CCD57_MOUSE	COILED-COIL DOMAIN-CONTAINING PROTEIN 57;COILED-COIL DOMAIN-CONTAINING PROTEIN 57-LIKE
6534	PORTHOMCL6534[AjBfCiDrGgLvMmOjOlPsSpXl|(13 genes, 12 taxa)]:	-0.128352	-0.462813	-0.591978	-0.220711	0.0190196	0.537824	-0.862766	-0.0889601	-0.805294	-0.580289	-0.582353	-0.655979	CCDC94;YJU2	CCDC94;YJU2	CCDC94;YJU2	CCDC94.L;YJU2	YJU2	CCDC94	COILED-COIL DOMAIN-CONTAINING PROTEIN 94	YJU2	CCD94_MOUSE	PUTATIVE COILED-COIL DOMAIN-CONTAINING PROTEIN;YJU2	CCD94_MOUSE;YJU2	COILED-COIL DOMAIN-CONTAINING PROTEIN 94;YJU2
7663	PORTHOMCL7663[BfCgCiDrGgLvMmOjOlPsSpXl|(12 genes, 12 taxa)]:	-0.275714	-0.631868	-0.620604	0.208113	0.0134559	-0.749765	-0.878584	0.84979	-0.898324	-0.602642	-0.466054	-0.655673	PGGT1B	PGGT1B	PGGT1B	PGGT1B.S;PGGT1B	PGGT1B	PGGT1B	GERANYLGERANYL TRANSFERASE TYPE-1 SUBUNIT BETA-LIKE;PGGT1B	PGGT1B	PGTB1_BOVIN;PGGT1B		PGTB1_BOVIN;PGGT1B	GERANYLGERANYL TRANSFERASE TYPE-1 SUBUNIT BETA;PGGT1B
4708	PORTHOMCL4708[AjBfCgCiDrGgLvMmOjOlPsSpXl|(15 genes, 13 taxa)]:	-0.541429	-0.70378	-0.542088	0.379951	0.170441	-0.390676	-0.915299	-0.625628	-0.740647	-0.466481	-0.759681	-0.655603	EXOSC3	EXOSC3	EXOSC3	EXOSC3.L;EXOSC3	EXOSC3	EXOSC3	EXOSOME COMPLEX COMPONENT RRP40-LIKE, TRANSCRIPT VARIANT X2; EXOSOME COMPLEX COMPONENT RRP40-LIKE, TRANSCRIPT VARIANT X1;EXOSC3	EXOSC3	EXOS3_HUMAN;EXOSC3	PUTATIVE EXOSOME COMPLEX COMPONENT RRP40-LIKE;EXOSC3	EXOS3_BOVIN;EXOSC3	EXOSOME COMPLEX COMPONENT RRP40, TRANSCRIPT VARIANT X2; EXOSOME COMPLEX COMPONENT RRP40, TRANSCRIPT VARIANT X1;EXOSC3
10767	PORTHOMCL10767[AjBfCgLvOjSp|(7 genes, 6 taxa)]:	0	0	0	0	0	0	0	0.441958	-0.585882	-0.85678	-0.521078	-0.65458									CENPF_HUMAN	PUTATIVE CENTROMERE PROTEIN F	CENPF_HUMAN	CENTROMERE PROTEIN F
1234	PORTHOMCL1234[AjBfCgCiDrGgLvMmOjOlPsSpXl|(27 genes, 13 taxa)]:	-0.164011	-0.778066	-0.670549	0.0846078	-0.607721	0.330676	-0.303753	-0.190919	-0.621676	-0.79711	-0.543995	-0.654261	HNRNPLL;HNRNPL	HNRPLL;HNRNPL;HNRNPLL	HNRNPLL;HNRNPL	HNRNPLL.L;LOC108700287;HNRNPL.L;HNRNPLL.S;HNRNPLL;HNRNPL	HNRNPLL;HETEROGENEOUS NUCLEAR RIBONUCLEOPROTEIN L;HNRNPL	HNRPL;HNRNPL2;HNRNPL	HETEROGENEOUS NUCLEAR RIBONUCLEOPROTEIN L-LIKE, TRANSCRIPT VARIANT X1; HETEROGENEOUS NUCLEAR RIBONUCLEOPROTEIN L-LIKE, TRANSCRIPT VARIANT X2	HNRNPL	HNRPL_RAT;HNRNPL	HYPOTHETICAL PROTEIN;PUTATIVE HETEROGENEOUS NUCLEAR RIBONUCLEOPROTEIN L	HNRPL_HUMAN	HETEROGENEOUS NUCLEAR RIBONUCLEOPROTEIN L;HNRNPL
3059	PORTHOMCL3059[AjBfCgCiDrGgLvMmOjOlPsSpXl|(18 genes, 13 taxa)]:	-0.225824	-0.186418	-0.477253	-0.0540196	-0.60848	-0.797676	-0.761403	-0.853487	-0.846912	-0.783364	-0.33223	-0.654169	RNF10	RNF10	RNF10	RNF10.S;LOC108716017;RNF10	RNF10	RNF10	RING FINGER PROTEIN 10, TRANSCRIPT VARIANT X1; RING FINGER PROTEIN 10, TRANSCRIPT VARIANT X2		RNF10_XENLA	PUTATIVE RING FINGER PROTEIN 10-LIKE;HYPOTHETICAL PROTEIN	RNF10_XENLA	RING FINGER PROTEIN 10
7142	PORTHOMCL7142[AjBfCgCiDrLvMmOjOlPsSpXl|(12 genes, 12 taxa)]:	0	-0.406718	-0.460249	-0.402966	-0.438553	-0.779241	-0.110383	0.737692	-0.748824	-0.681115	-0.530392	-0.653443		FOXN4	FOXN4	FOXN4.S;FOXN4	FOXN4	FOXN4	FORKHEAD BOX PROTEIN N4-LIKE		FOXN4_DANRE	FORKHEAD TRANSCRIPTION FACTOR N1/4 TRANSCRIPT VARIANT 2	FOXN4_XENLA	FORKHEAD TRANSCRIPTION FACTOR N1/4
794	PORTHOMCL794[AjBfCgCiDrGgLvMmOjOlPsSpXl|(33 genes, 13 taxa)]:	0.174286	0.128326	-0.59044	0.40826	-0.123015	0.764118	-0.622571	-0.524825	-0.916088	-0.773519	-0.270711	-0.653439	LRRC7;ERBIN;LRRC8A	LRRC7	LRRC7;GM28035;LRRC8A;LRRC8C;LRRC8B;ERBIN	LOC108718091;LOC108711675;ERBIN;LRRC8D	LRRC7;LRRC8AA;LRRC8AB;LRRC8C;LRRC8A	LRRC7;LRRC8AA;ERBB2IP;LRRC8AB;LRRC8C;LRRC8A	UNCHARACTERIZED LOC100178027, TRANSCRIPT VARIANT X2; UNCHARACTERIZED LOC100178027, TRANSCRIPT VARIANT X1		LRRC7_MOUSE;LAP1_DROME	HYPOTHETICAL PROTEIN;LRRC7	LRRC7_RAT	LEUCINE-RICH REPEAT-CONTAINING PROTEIN 7-LIKE;PROTEIN LAP2-LIKE
8235	PORTHOMCL8235[AjDrGgLvMmOjOlPsSpXl|(11 genes, 10 taxa)]:	-0.716264	-0.917099	-0.798462	-0.0799755	0.0498284	-0.948462	0	0	-0.810971	-0.78258	-0.366652	-0.653401	CENPO	CENPO	CENPO	CENPO.L;CENPO	CENPO	CENPO			CENPO_CHICK	PUTATIVE CENTROMERE PROTEIN O-LIKE	AGO2_MOUSE	CENTROMERE PROTEIN O-LIKE
5317	PORTHOMCL5317[AjBfCgCiDrGgLvMmOjOlPsSpXl|(14 genes, 13 taxa)]:	-0.597527	-0.700527	-0.763681	0.350172	0.0905147	0.491235	-0.847519	0.89341	-0.790765	-0.777647	-0.391176	-0.653196		RTF1	RTF1	RTF1.L;RTF1	RTF1	RTF1	RNA POLYMERASE-ASSOCIATED PROTEIN RTF1 HOMOLOG;RTF1	RTF1	RTF1_HUMAN;RTF1	PUTATIVE RNA POLYMERASE-ASSOCIATED PROTEIN RTF1-LIKE;RTF1	RTF1_MOUSE;RTF1	RNA POLYMERASE-ASSOCIATED PROTEIN RTF1 HOMOLOG;RTF1
4496	PORTHOMCL4496[AjBfCgCiDrGgLvMmOjOlPsSpXl|(15 genes, 13 taxa)]:	-0.143242	-0.450066	-0.411758	-0.0690441	0.220221	0.115	-0.808545	-0.666084	-0.878647	-0.673251	-0.407475	-0.653124	GAPVD1	GAPVD1	GAPVD1	GAPVD1.L;GAPVD1.S;GAPVD1	GAPVD1	GAPVD1	GTPASE-ACTIVATING PROTEIN AND VPS9 DOMAIN-CONTAINING PROTEIN 1, TRANSCRIPT VARIANT X3; GTPASE-ACTIVATING PROTEIN AND VPS9 DOMAIN-CONTAINING PROTEIN 1, TRANSCRIPT VARIANT X2; GTPASE-ACTIVATING PROTEIN AND VPS9 DOMAIN-CONTAINING PROTEIN 1, TRANSCRIPT VARIANT X1	GAPVD1	GAPD1_MOUSE	PUTATIVE GTPASE-ACTIVATING PROTEIN AND VPS9 DOMAIN-CONTAINING PROTEIN 1	GAPD1_MOUSE	GTPASE-ACTIVATING PROTEIN AND VPS9 DOMAIN-CONTAINING PROTEIN 1
3293	PORTHOMCL3293[AjBfCgCiDrGgLvMmOjOlPsSpXl|(17 genes, 13 taxa)]:	-0.675604	-0.427077	-0.510055	0.233494	0.0527206	-0.665971	-0.766494	-0.814917	-0.849735	-0.782601	-0.325368	-0.652568	HLCS	HLCS	HLCS	HLCS.L;HLCS	HLCS	HLCS	BIOTIN--PROTEIN LIGASE;BIOTIN--PROTEIN LIGASE-LIKE;LOC100179742	HLCS	BPL1_HUMAN	PUTATIVE BIOTIN--PROTEIN LIGASE;HYPOTHETICAL PROTEIN;HLCS	BPL1_HUMAN;BPL1_MOUSE	BIOTIN--PROTEIN LIGASE
3246	PORTHOMCL3246[AjBfCgCiDrGgLvMmOjOlPsSpXl|(17 genes, 13 taxa)]:	-0.709341	-0.98	-0.780989	0.289926	-0.0105637	0.534176	-0.813532	0.0079021	-0.898588	-0.600186	-0.458456	-0.65241	SPSB4	SPSB4	SPSB4;SPSB2	SPSB4.L;SPSB4.S;SPSB4	SPSB4A (1 OF MANY);SPSB4	SPSB4A;SPSB4B;SPSB4	CI-META3;SPSB4	SPSB4	GUS_DROME	PUTATIVE SPRY DOMAIN-CONTAINING SOCS BOX PROTEIN 4;SPSB4	GUS_DROME	SPRY DOMAIN-CONTAINING SOCS BOX PROTEIN 4, TRANSCRIPT VARIANT X5; SPRY DOMAIN-CONTAINING SOCS BOX PROTEIN 4, TRANSCRIPT VARIANT X4; SPRY DOMAIN-CONTAINING SOCS BOX PROTEIN 4, TRANSCRIPT VARIANT X6; SPRY DOMAIN-CONTAINING SOCS BOX PROTEIN 4, TRANSCRIPT VARIANT X3; SPRY DOMAIN-CONTAINING SOCS BOX PROTEIN 4, TRANSCRIPT VARIANT X2; SPRY DOMAIN-CONTAINING SOCS BOX PROTEIN 4, TRANSCRIPT VARIANT X1
653	PORTHOMCL653[AjBfCgCiDrGgLvMmOjOlPsSpXl|(36 genes, 13 taxa)]:	-0.525	-0.724044	-0.55511	0.196348	-0.0174755	0.418706	-0.746494	0.633077	-0.819263	-0.900722	-0.23701	-0.652332	RANBP2	RANBP2	RANBP2	RANBP2.L;RANBP2.S;RANBP2	SI:CH1073-55A19.2	RANBP2;SI:ZFOS-979F1.2	E3 SUMO-PROTEIN LIGASE RANBP2-LIKE		RGPD4_HUMAN;RBP2_MOUSE	PUTATIVE E3 SUMO-PROTEIN LIGASE RANBP2-LIKE;PUTATIVE E3 SUMO-PROTEIN LIGASE RANBP2	RBP2_PANTR	E3 SUMO-PROTEIN LIGASE RANBP2, TRANSCRIPT VARIANT X1; E3 SUMO-PROTEIN LIGASE RANBP2, TRANSCRIPT VARIANT X2; E3 SUMO-PROTEIN LIGASE RANBP2, TRANSCRIPT VARIANT X3; E3 SUMO-PROTEIN LIGASE RANBP2, TRANSCRIPT VARIANT X4;E3 SUMO-PROTEIN LIGASE RANBP2-LIKE;E3 SUMO-PROTEIN LIGASE RANBP2, TRANSCRIPT VARIANT X2; E3 SUMO-PROTEIN LIGASE RANBP2, TRANSCRIPT VARIANT X1;RANBP2-LIKE AND GRIP DOMAIN-CONTAINING PRO…
7078	PORTHOMCL7078[AjBfCiDrGgLvMmOjOlPsSpXl|(12 genes, 12 taxa)]:	-0.341923	-0.382725	-0.387418	-0.446593	0.253873	0.245265	-0.693623	0.151066	-0.716765	-0.710526	-0.528922	-0.652071	GNPTG	GNPTG	GNPTG	GNPTG.L;GNPTG	GNPTG	GNPTG	N-ACETYLGLUCOSAMINE-1-PHOSPHOTRANSFERASE SUBUNIT GAMMA-LIKE;GNPTG	GNPTG	GNPTG_BOVIN;GNPTG	N-ACETYLGLUCOSAMINE-1-PHOSPHOTRANSFERASE SUBUNIT GAMMA;GNPTG	GNPTG_HUMAN	N-ACETYLGLUCOSAMINE-1-PHOSPHOTRANSFERASE SUBUNIT GAMMA;GNPTG
2549	PORTHOMCL2549[AjBfCgCiDrGgLvMmOjOlPsSpXl|(19 genes, 13 taxa)]:	-0.0936264	-0.716088	-0.773571	-0.250588	-0.445662	-0.0955882	-0.776195	-0.20604	-0.794647	-0.886151	-0.27451	-0.651769	NF1	NF1	NF1	LOC108709669	NF1	NF1B;NF1A	NEUROFIBROMIN-LIKE;NEUROFIBROMIN	NF1	NF1_RAT	PUTATIVE NEUROFIBROMIN;PUTATIVE NEUROFIBROMIN-LIKE	NF1_RAT;NF1_HUMAN	NEUROFIBROMIN-LIKE;NEUROFIBROMIN
10112	PORTHOMCL10112[AjBfCgCiLvOjSpXl|(8 genes, 8 taxa)]:	0	0	0	0.0426968	0	0	-0.870948	-0.0436713	-0.757147	-0.781218	-0.416912	-0.651759				RNF168.S;RNF168			ZINC FINGER PROTEIN		RN168_DANRE	HYPOTHETICAL PROTEIN	RN168_XENLA	E3 UBIQUITIN-PROTEIN LIGASE RNF168-LIKE
1318	PORTHOMCL1318[AjBfCgCiDrGgLvMmOjOlPsSpXl|(26 genes, 13 taxa)]:	-0.437527	-0.86422	-0.552857	-0.312941	-0.335245	0.339029	-0.875597	-0.0699529	-0.572088	-0.774035	-0.609069	-0.651731	UTP6	UTP6;TEFM	TEFM;UTP6	UTP6.L;TEFM.L;UTP6;TEFM	UTP6	TEFM;UTP6	U3 SMALL NUCLEOLAR RNA-ASSOCIATED PROTEIN 6 HOMOLOG;UTP6	UTP6	UTP6_MOUSE;TEFM_MOUSE;UTP6	PUTATIVE U3 SMALL NUCLEOLAR RNA-ASSOCIATED PROTEIN 6-LIKE;PUTATIVE TRANSCRIPTION ELONGATION FACTOR, MITOCHONDRIAL ISOFORM X2;HYPOTHETICAL PROTEIN	UTP6_HUMAN;TEFM_MOUSE;UTP6_MOUSE;UTP6	U3 SMALL NUCLEOLAR RNA-ASSOCIATED PROTEIN 6 HOMOLOG;TRANSCRIPTION ELONGATION FACTOR, MITOCHONDRIAL, TRANSCRIPT VARIANT X1; TRANSCRIPTION ELONGATION FACTOR, MITOCHONDRIAL, TRANSCRIPT VARIANT X2
41	PORTHOMCL41[AjBfCgCiDrGgLvMmOjOlPsSpXl|(165 genes, 13 taxa)]:	-0.359286	-0.945802	-0.890549	0.583714	-0.370931	-0.0706493	0.135014	0.572797	-0.861581	-0.682266	-0.410784	-0.651544	H2B-VII;H2B-VIII;HIST1H2B5		HIST1H2BB;HIST1H2BH;HIST1H2BF;HIST1H2BJ;HIST1H2BN;HIST1H2BL;HIST1H2BC;HIST1H2BE;HIST1H2BG;HIST1H2BK;HIST1H2BA;HIST1H2BM;HIST2H2BB;HIST2H2BE;HIST1H2BP;HIST3H2BA;1700024P04RIK;HIST1H2BR;H2BFM;HIST1H2BQ;H2BC1	LOC108703940;XELAEV18001466M;LOC108703794;LOC108695577;LOC108703797;LOC108703795;LOC108703793;LOC108703796;LOC108704304;LOC108716547;LOC108716546;LOC108716545;LOC108716548;LOC108695579;LOC108704302;LOC108705274	HISTONE H2B 1/2	HIST2H2L;ZGC:173585;SI:DKEY-261M9.19;SI:CH211-190P8.2;SI:DKEY-261M9.6;SI:DKEY-108K21.11;FP236812.9;SI:CH211-113A14.28;SI:CH73-368J24.8;ANO9A;SI:CH211-113A14.15;ZGC:173587;FP236812.8;SI:DKEY-23A13.22;HIST1H2BA;SI:CH1073-159D7.6;SI:CH73-368J24.9;SI:DKEY-108K21.17;SI:DKEY-23A13.16;ZGC:114046;SI:DKEY-108K21.13;ZGC:194989;SI:CH211-113A14.22;SI:CH73-368J24.10;ZGC:110434;SI:CH1073-153I20.3;FP236812.10;S…	LATE HISTONE H2B.L4-LIKE;HISTONE H2B-LIKE		H2B1_DANRE;H2BE1_PSAMI	HYPOTHETICAL PROTEIN	H2BE1_PSAMI;H2BE2_PSAMI;H2BL2_PSAMI;H2BL1_PSAMI;H2BE_STRPU;H2BS2_LYTPI;H2BL4_STRPU	LATE HISTONE H2B.L4-LIKE;LATE HISTONE L3 H2B;LATE HISTONE H2B.L4;HISTONE H2B.2, EMBRYONIC;LATE HISTONE H2B.L3-LIKE;LATE HISTONE L1 H2B, TRANSCRIPT VARIANT X1; LATE HISTONE L1 H2B;HISTONE H2B.2, EMBRYONIC-LIKE;HISTONE H2B;HISTONE H2B-LIKE;UNCHARACTERIZED LOC592703
6661	PORTHOMCL6661[AjBfCgCiDrGgLvMmOjOlPsSpXl|(13 genes, 13 taxa)]:	0.172308	-0.257319	-0.587582	-0.262771	0.0827206	-0.487618	-0.819078	-0.51475	-0.846647	-0.865614	-0.242157	-0.651473		TTI1	TTI1	LOC108704602	TTI1	TTI1	TELO2-INTERACTING PROTEIN 1 HOMOLOG	TTI1	TTI1_HUMAN	HYPOTHETICAL PROTEIN	TTI1_MOUSE	TELO2-INTERACTING PROTEIN 1 HOMOLOG
5449	PORTHOMCL5449[AjBfCgCiDrGgLvMmOjOlPsSpXl|(14 genes, 13 taxa)]:	-0.183956	-0.188132	-0.531044	0.128897	-0.0795343	-0.132118	-0.846325	0.738112	-0.524	-0.761899	-0.668015	-0.651305	NSUN5	NSUN5	NSUN5	LOC108707994;NSUN5	NSUN5	NSUN5	PROBABLE 28S RRNA (CYTOSINE-C(5))-METHYLTRANSFERASE;NSUN5	NSUN5	NSUN5_HUMAN;NSUN5	PUTATIVE METHYLTRANSFERASE NSUN5-LIKE;PUTATIVE 28S RRNA (CYTOSINE-C(5))-METHYLTRANSFERASE;NSUN5	NSUN5_HUMAN	PROBABLE 28S RRNA (CYTOSINE-C(5))-METHYLTRANSFERASE;NSUN5
9951	PORTHOMCL9951[AjBfLvMmOjSpXl|(8 genes, 7 taxa)]:	0	0	-0.721429	0.334142	0	0	0	0.593916	-0.839265	-0.710836	-0.403431	-0.651177			DOT1L	LOC108706873					DOT1L_HUMAN	PUTATIVE HISTONE-LYSINE N-METHYLTRANSFERASE, H3 LYSINE-79 SPECIFIC ISOFORM X3;PUTATIVE HISTONE-LYSINE N-METHYLTRANSFERASE, H3 LYSINE-79 SPECIFIC ISOFORM X2	DOT1L_HUMAN	HISTONE-LYSINE N-METHYLTRANSFERASE, H3 LYSINE-79 SPECIFIC, TRANSCRIPT VARIANT X2; HISTONE-LYSINE N-METHYLTRANSFERASE, H3 LYSINE-79 SPECIFIC, TRANSCRIPT VARIANT X3; HISTONE-LYSINE N-METHYLTRANSFERASE, H3 LYSINE-79 SPECIFIC, TRANSCRIPT VARIANT X1
2384	PORTHOMCL2384[AjBfCgCiDrGgLvMmOjOlPsSpXl|(20 genes, 13 taxa)]:	0.455549	-0.0938462	0.534505	0.421667	0.153015	0.744059	-0.931299	-0.648403	-0.892206	-0.589639	-0.471201	-0.651015	ACVR1;ACVRL1	ACVR1;ACVRL1	ACVR1;ACVRL1	ACVR1.L;ACVR1.S;ACVR1	ACTIVIN A RECEPTOR TYPE 1;ACVR1L;ACVRL1;ACVR1	ACVR1L;ACVRL1	TRANSFORMING GROWTH FACTOR BETA RECEPTOR		ACVR1_CHICK;ACVR1	PUTATIVE ACTIVIN RECEPTOR TYPE-1-LIKE	ACVR1_HUMAN	ACTIVIN RECEPTOR TYPE-1, TRANSCRIPT VARIANT X3; ACTIVIN RECEPTOR TYPE-1, TRANSCRIPT VARIANT X2; ACTIVIN RECEPTOR TYPE-1, TRANSCRIPT VARIANT X1
3923	PORTHOMCL3923[AjBfCgCiDrGgLvMmOjOlPsSpXl|(16 genes, 13 taxa)]:	0.237692	-0.819912	-0.702582	-0.645956	-0.301863	-0.177441	-0.730649	-0.314196	-0.844118	-0.594407	-0.514338	-0.650954	TTC21B	TTC21B	TTC21B	LOC108701356;TTC21B	TTC21B	TTC21B;TTC21A	TETRATRICOPEPTIDE REPEAT PROTEIN 21B	TTC21B	TT21B_HUMAN;TTC21B	PUTATIVE TETRATRICOPEPTIDE REPEAT PROTEIN 21B-LIKE;PUTATIVE TETRATRICOPEPTIDE REPEAT PROTEIN 21B	TT21B_HUMAN;TTC21B	TETRATRICOPEPTIDE REPEAT PROTEIN 21B;TTC21B
13269	PORTHOMCL13269[AjBfLvOjSp|(5 genes, 5 taxa)]:	0	0	0	0	0	0	0	0.266713	-0.831382	-0.477337	-0.64326	-0.65066										HYPOTHETICAL PROTEIN		UNCHARACTERIZED LOC105436842
5140	PORTHOMCL5140[AjBfCgCiDrGgLvMmOjOlPsSpXl|(14 genes, 13 taxa)]:	-0.230165	-0.0653187	0.128242	0.478333	-0.912843	-0.518765	-0.702208	0.20965	-0.760118	-0.633602	-0.558088	-0.650603	AHI1	AHI1	AHI1	LOC108716153;AHI1	AHI1	AHI1	JOUBERIN-LIKE, TRANSCRIPT VARIANT X1; JOUBERIN-LIKE, TRANSCRIPT VARIANT X2		AHI1_HUMAN;AHI1	PUTATIVE JOUBERIN;PUTATIVE JOUBERIN-LIKE;AHI1	AHI1_RAT	JOUBERIN
3306	PORTHOMCL3306[AjBfCgCiDrGgLvMmOjOlPsSpXl|(17 genes, 13 taxa)]:	-0.515055	-0.454549	-0.543187	0.202132	-0.352304	-0.368882	-0.743831	-0.559811	-0.759706	-0.711207	-0.479779	-0.650231	ZPR1	ZNF259;ZPR1	ZPR1	ZPR1.L;ZPR1	ZPR1	ZPR1	ZINC FINGER PROTEIN ZPR1;ZPR1	ZPR1	ZPR1_MOUSE	PUTATIVE ZINC FINGER PROTEIN;ZPR1	ZPR1_MOUSE	UNCHARACTERIZED LOC100891249;INTRAFLAGELLAR TRANSPORT PROTEIN 57 HOMOLOG, TRANSCRIPT VARIANT X3; INTRAFLAGELLAR TRANSPORT PROTEIN 57 HOMOLOG, TRANSCRIPT VARIANT X2; INTRAFLAGELLAR TRANSPORT PROTEIN 57 HOMOLOG, TRANSCRIPT VARIANT X4
1706	PORTHOMCL1706[AjBfCgCiDrGgLvMmOjOlPsSpXl|(23 genes, 13 taxa)]:	0.226648	-0.537538	-0.717692	0.0744141	0.292121	0.120147	-0.724221	-0.433147	-0.598176	-0.807554	-0.54424	-0.64999	ZFYVE9	ZFYVE9	ZFYVE9	ZFYVE9.S;ZFYVE9.L;ZFYVE9	ZFYVE9B	ZFYVE9A;ZFYVE16;ZFYVE9B;ZFYVE9	ZINC FINGER (FYVE)-3	ZFYVE9	ZFYV9_HUMAN	HYPOTHETICAL PROTEIN;ZFYVE9	ZFYV9_HUMAN	UNCHARACTERIZED LOC575625, TRANSCRIPT VARIANT X1; UNCHARACTERIZED LOC575625, TRANSCRIPT VARIANT X2
2698	PORTHOMCL2698[AjBfCgDrGgLvMmOjOlPsSpXl|(19 genes, 12 taxa)]:	-0.11967	-0.627385	-0.240714	-0.337077	0.507279	0.0866176	0	0.327972	-0.698941	-0.712178	-0.538725	-0.649948	PDP1;PDP2	PDP1;PDP2	PDP1;PDP2	PDP2.L	PDP1;PDP2;SI:CH211-15P9.2	PDP1;PDP2;SI:CH211-15P9.2		PDP1	PDP1_BOVIN;PDP2	PUTATIVE PYRUVATE DEHYDROGENASE	PDP1_HUMAN;PDP1	PYRUVATE DEHYDROGENASE [ACETYL-TRANSFERRING]-PHOSPHATASE 1, MITOCHONDRIAL-LIKE;PDP2
4638	PORTHOMCL4638[AjBfCgCiDrLvMmOjOlSpXl|(15 genes, 11 taxa)]:	0	0	-0.626868	0.427672	0.0520588	0.0621176	-0.549	-0.566978	-0.599676	-0.842043	-0.508088	-0.649936			ELOB;GM15698	TCEB2.L	ELOB	TCEB2;ELOB	TRANSCRIPTION ELONGATION FACTOR B POLYPEPTIDE 2-LIKE	ELOB	ELOB_RAT;ELOB	PUTATIVE TRANSCRIPTION ELONGATION FACTOR B POLYPEPTIDE 2;PUTATIVE TRANSCRIPTION ELONGATION FACTOR B POLYPEPTIDE 2-LIKE;ELOB	ELOB_RAT;ELOB	TRANSCRIPTION ELONGATION FACTOR B POLYPEPTIDE 2;TRANSCRIPTION ELONGATION FACTOR B POLYPEPTIDE 2-LIKE;ELOB
2202	PORTHOMCL2202[AjBfCgCiDrGgLvMmOjOlPsSpXl|(20 genes, 13 taxa)]:	0.48967	-0.83978	-0.325934	-0.307525	0.4075	0.252912	-0.0225584	-0.677413	-0.772382	-0.687059	-0.490074	-0.649838	CELF1;CELF2	CELF1;CELF2	CELF1;CELF2	CELF1.L;CELF2.L;CELF1.S;CELF1;CELF2	CUGBP ELAV-LIKE FAMILY MEMBER 2;CELF2	CELF1;CELF2	CUGBP ELAV-LIKE FAMILY MEMBER 1, TRANSCRIPT VARIANT X1; CUGBP ELAV-LIKE FAMILY MEMBER 1, TRANSCRIPT VARIANT X2	CELF2	CELF2_RAT	PUTATIVE CUGBP ELAV-LIKE FAMILY MEMBER 2-LIKE	CEL3A_XENLA;CELF2	CUGBP ELAV-LIKE FAMILY MEMBER 2
3391	PORTHOMCL3391[AjBfCgCiDrGgLvMmOjOlPsSpXl|(17 genes, 13 taxa)]:	-0.45956	-0.565714	-0.56022	-0.0451716	0.107941	-0.512318	-0.881597	0.773566	-0.564647	-0.642456	-0.741544	-0.649549	THUMPD1	THUMPD1	THUMPD1	THUMPD1.L;THUMPD1.S;THUMPD1	THUMPD1	THUMPD1	THUMP DOMAIN-CONTAINING PROTEIN 1-LIKE;UNCHARACTERIZED LOC100181043	THUMPD1	THUM1_HUMAN	PUTATIVE THUMP DOMAIN-CONTAINING PROTEIN 1	THUM1_BOVIN;ERI2	THUMP DOMAIN-CONTAINING PROTEIN 1;THUMP DOMAIN-CONTAINING PROTEIN 1-LIKE;ERI2
4267	PORTHOMCL4267[BfCgCiDrGgLvMmOjOlPsSpXl|(16 genes, 12 taxa)]:	-0.0647806	0.554659	0.933715	-0.0437175	-0.336299	-0.688166	-0.604104	0.303098	-0.738882	-0.516533	-0.692892	-0.649436		SLC22A18	SLC22A18	SLC22A18.L;SLC22A18	SLC22A18	SLC22A18	SOLUTE CARRIER FAMILY 22 MEMBER 18;SLC22A18		S22AI_MOUSE;SLC22A18		S22AI_MOUSE;SLC22A18	SOLUTE CARRIER FAMILY 22 MEMBER 18, TRANSCRIPT VARIANT X1
3198	PORTHOMCL3198[AjBfCgCiDrGgLvMmOjOlPsSpXl|(17 genes, 13 taxa)]:	-0.44956	-0.935429	-0.415055	0.327917	-0.268775	0.234353	-0.664948	-0.123003	-0.641118	-0.835108	-0.471569	-0.649265	TARDBP	TARDBP	TARDBP	TARDBP.S;TARDBP	TARDBPL	TARDBPL	TARDBP PROTEIN;TARDBP		TADBP_HUMAN	PUTATIVE TAR DNA-BINDING PROTEIN 43 ISOFORM X2	TADBP_HUMAN	TAR DNA-BINDING PROTEIN 43, TRANSCRIPT VARIANT X2; TAR DNA-BINDING PROTEIN 43, TRANSCRIPT VARIANT X1
3737	PORTHOMCL3737[AjBfCgCiDrGgLvMmOjOlPsSpXl|(16 genes, 13 taxa)]:	-0.0989011	-0.25178	-0.646648	-0.672966	-0.285637	0.683059	-0.810961	-0.885422	-0.793882	-0.748256	-0.404534	-0.648891	USP19	USP4	USP19	USP19.S;USP19.L;USP19	USP19	USP19	ZINC FINGER PROTEIN		UBP19_RAT	PUTATIVE UBIQUITIN CARBOXYL-TERMINAL HYDROLASE 19	UBP19_HUMAN	UBIQUITIN CARBOXYL-TERMINAL HYDROLASE 19
4009	PORTHOMCL4009[AjBfCgCiDrGgLvMmOjOlPsSpXl|(16 genes, 13 taxa)]:	-0.472363	-0.83644	-0.625165	-0.836103	-0.320147	0.173206	-0.551026	-0.732876	-0.9075	-0.79393	-0.243691	-0.648374	FANCI	FANCI	FANCI	FANCI.L;FANCI	FANCI	FANCI	FANCONI ANEMIA GROUP I PROTEIN-LIKE, TRANSCRIPT VARIANT X2; FANCONI ANEMIA GROUP I PROTEIN-LIKE, TRANSCRIPT VARIANT X1	FANCI	FANCI_MOUSE;FANCI	PUTATIVE FANCONI ANEMIA GROUP I PROTEIN	FANCI_HUMAN;FANCI	FANCONI ANEMIA GROUP I PROTEIN;FANCI
4148	PORTHOMCL4148[AjBfCgCiDrGgLvMmOjOlPsSpXl|(16 genes, 13 taxa)]:	-0.393077	-0.543648	-0.599396	0.246152	-0.726716	0.0473824	-0.890844	0.235193	-0.849412	-0.561754	-0.533088	-0.648085		NCAPH2	NCAPH2;GM7535	NCAPH2.L;NCAPH2.S;NCAPH2	NCAPH2	NCAPH2	CONDENSIN-2 COMPLEX SUBUNIT H2-LIKE, TRANSCRIPT VARIANT X1	NCAPH2	CNDH2_XENLA;NCAPH2	PUTATIVE CONDENSIN-2 COMPLEX SUBUNIT H2 ISOFORM X3	CNDH2_XENLA	CONDENSIN-2 COMPLEX SUBUNIT H2, TRANSCRIPT VARIANT X5; CONDENSIN-2 COMPLEX SUBUNIT H2, TRANSCRIPT VARIANT X4; CONDENSIN-2 COMPLEX SUBUNIT H2, TRANSCRIPT VARIANT X3; CONDENSIN-2 COMPLEX SUBUNIT H2, TRANSCRIPT VARIANT X2; CONDENSIN-2 COMPLEX SUBUNIT H2, TRANSCRIPT VARIANT X1;NCAPH2
7314	PORTHOMCL7314[AjCiGgLvMmOjOlPsSpXl|(12 genes, 10 taxa)]:	-0.0442857	0.468703	-0.401813	0.340784	-0.400784	0	0.239377	0	-0.864	-0.7116	-0.367647	-0.647749		DYRK1B	DYRK1B	DYRK1A.2.L;DYRK1B	DYRK1B		DUAL SPECIFICITY TYROSINE-PHOSPHORYLATION-REGULATED KINASE 1A, TRANSCRIPT VARIANT X1; DUAL SPECIFICITY TYROSINE-PHOSPHORYLATION-REGULATED KINASE 1A, TRANSCRIPT VARIANT X2		DYR1A_RAT	PUTATIVE DUAL SPECIFICITY TYROSINE-PHOSPHORYLATION-REGULATED KINASE 1A	DYR1A_RAT	DUAL SPECIFICITY TYROSINE-PHOSPHORYLATION-REGULATED KINASE 1A
3149	PORTHOMCL3149[BfCgDrGgLvMmOjOlPsSpXl|(18 genes, 11 taxa)]:	0.411044	-0.601934	-0.486319	-0.67098	-0.0509069	0.296618	0	0.945245	-0.803118	-0.649474	-0.490196	-0.647596	RAP1GDS1	RAP1GDS1	RAP1GDS1	RAP1GDS1.L;LOC108703389;RAP1GDS1.S;RAP1GDS1	RAP1GDS1;SI:DKEY-191G9.5	RAP1GDS1;SI:DKEY-191G9.5;SI:DKEY-21E13.3		RAP1GDS1	GDS1B_XENLA;RAP1GDS1		GDS1B_XENLA;RAP1GDS1	RAP1 GTPASE-GDP DISSOCIATION STIMULATOR 1-B;RAP1GDS1
5348	PORTHOMCL5348[AjBfCgCiDrGgLvMmOjOlPsSpXl|(14 genes, 13 taxa)]:	0.312088	-0.474857	-0.465055	0.30674	0.111471	0.247529	-0.703442	-0.604148	-0.638588	-0.725452	-0.578554	-0.647532	SIRT7	SIRT7	SIRT7	SIRT7.L;SIRT7	SIRT7	SIRT7	NAD-DEPENDENT PROTEIN DEACETYLASE SIRTUIN-7;SIRT7	SIRT7	SIR7_HUMAN;SIRT7	PUTATIVE NAD-DEPENDENT PROTEIN DEACETYLASE SIRTUIN-7-LIKE;SIRT7	SIR7_HUMAN;SIRT7	NAD-DEPENDENT PROTEIN DEACETYLASE SIRTUIN-7;SIRT7
4861	PORTHOMCL4861[AjBfCgCiDrGgLvMmOjOlPsSpXl|(15 genes, 13 taxa)]:	-0.806264	-0.383648	-0.48044	-0.307083	-0.199167	-0.110382	-0.799026	-0.816321	-0.837029	-0.702394	-0.402819	-0.647414	NUDT1	NUDT1	NUDT1	NUDT1.S;NUDT1	NUDT1	NUDT1	7,8-DIHYDRO-8-OXOGUANINE TRIPHOSPHATASE-LIKE;NUDT1	NUDT1	8ODP_RAT;NUDT1	PUTATIVE 7,8-DIHYDRO-8-OXOGUANINE TRIPHOSPHATASE;NUDT1	8ODP_RAT;NUDT1	7,8-DIHYDRO-8-OXOGUANINE TRIPHOSPHATASE;NUDT1
4750	PORTHOMCL4750[AjBfCgCiDrGgLvMmOjOlPsSpXl|(15 genes, 13 taxa)]:	-0.470604	-0.717538	-0.877088	-0.752353	-0.190735	0.153824	-0.807519	-0.562945	-0.689941	-0.628359	-0.622426	-0.646909	HEATR6	HEATR6	HEATR6	HEATR6.S;HEATR6	HEATR6	HEATR6	HEAT REPEAT-CONTAINING PROTEIN 6-LIKE		HEAT6_DANRE;HEATR6	PUTATIVE HEAT REPEAT-CONTAINING PROTEIN 6;HEATR6	HEAT6_RAT	HEAT REPEAT-CONTAINING PROTEIN 6;HEATR6
5267	PORTHOMCL5267[AjBfCgCiDrGgLvMmOjOlPsSpXl|(14 genes, 13 taxa)]:	-0.199286	-0.483956	-0.252418	0.222647	0.294926	0.6715	0.719974	-0.762788	-0.459735	-0.850196	-0.630637	-0.646856	C6ORF106;ILRUN	C6ORF106;ILRUN	D17WSU92E;ILRUN	C6ORF106.S;ILRUN	C6ORF106 (1 OF MANY);ZGC:101577;ILRUN (1 OF MANY)	ZGC:101577	UNCHARACTERIZED PROTEIN C6ORF106 HOMOLOG, TRANSCRIPT VARIANT X2; UNCHARACTERIZED PROTEIN C6ORF106 HOMOLOG, TRANSCRIPT VARIANT X1;ILRUN	ILRUN	CF106_MOUSE;ILRUN	HYPOTHETICAL PROTEIN	CF106_DANRE;ILRUN	UNCHARACTERIZED PROTEIN C6ORF106 HOMOLOG;ILRUN
6448	PORTHOMCL6448[AjBfCgCiDrGgLvMmOjOlPsSpXl|(13 genes, 13 taxa)]:	-0.439725	-0.811385	-0.627912	0.250294	-0.166152	0.421324	-0.685429	-0.770024	-0.742324	-0.765738	-0.431863	-0.646641	CEP192	CEP192	CEP192	CEP192.L;CEP192		CEP192	CENTROSOMAL PROTEIN OF 192 KDA;LOC100185324		CE192_HUMAN	HYPOTHETICAL PROTEIN	CE192_HUMAN	CENTROSOMAL PROTEIN OF 192 KDA
8177	PORTHOMCL8177[AjCiGgLvMmOjPsSpXl|(11 genes, 9 taxa)]:	-0.188297	-0.439208	-0.805934	-0.0412876	0	0	-0.650792	0	-0.790844	-0.660289	-0.487431	-0.646188		C4ORF21	ZGRF1	LOC108710251			PROTEIN ZGRF1-LIKE, TRANSCRIPT VARIANT X1; PROTEIN ZGRF1-LIKE, TRANSCRIPT VARIANT X2;PROTEIN ZGRF1-LIKE, TRANSCRIPT VARIANT X2; PROTEIN ZGRF1-LIKE, TRANSCRIPT VARIANT X1		ZGRF1_HUMAN	HYPOTHETICAL PROTEIN	ZGRF1_MOUSE	PROTEIN ZGRF1
4461	PORTHOMCL4461[AjBfCgCiDrGgLvMmOjOlPsSpXl|(15 genes, 13 taxa)]:	-0.0905495	-0.828396	-0.805275	0.222518	-4.51185e-05	-0.823252	0.610532	0.401189	-0.529971	-0.76258	-0.645956	-0.646169	C11ORF70;CFAP300	C11ORF70;CFAP300	9230110C19RIK;CFAP300	C11ORF70.L;CFAP300	CFAP300	SI:RP71-1P14.7;CFAP300	UNCHARACTERIZED PROTEIN C11ORF70 HOMOLOG, TRANSCRIPT VARIANT X1; UNCHARACTERIZED PROTEIN C11ORF70 HOMOLOG, TRANSCRIPT VARIANT X2; UNCHARACTERIZED PROTEIN C11ORF70 HOMOLOG, TRANSCRIPT VARIANT X3		CK070_XENTR	HYPOTHETICAL PROTEIN;CFAP300	CK070_RAT;CFAP300	UNCHARACTERIZED PROTEIN C11ORF70 HOMOLOG;CFAP300
5224	PORTHOMCL5224[AjBfCiDrGgLvMmOjOlPsSpXl|(14 genes, 12 taxa)]:	-0.575385	-0.733934	-0.663297	-0.307794	-0.160564	-0.460706	-0.909948	0.855524	-0.744059	-0.738762	-0.455515	-0.646112	ORC4	ORC4	ORC4	ORC4.L;ORC4	ORC4	ORC4	ORIGIN RECOGNITION COMPLEX SUBUNIT 4;ORC4	ORC4	ORC4_XENLA;ORC4	PUTATIVE ORIGIN RECOGNITION COMPLEX SUBUNIT 4-LIKE;ORC4	ORC4_HUMAN;ORC4	ORIGIN RECOGNITION COMPLEX SUBUNIT 4, TRANSCRIPT VARIANT X2; ORIGIN RECOGNITION COMPLEX SUBUNIT 4, TRANSCRIPT VARIANT X1;ORIGIN RECOGNITION COMPLEX SUBUNIT 4-LIKE;ORC4
5416	PORTHOMCL5416[AjBfCgDrGgLvMmOjOlPsSpXl|(14 genes, 12 taxa)]:	0.135	-0.739033	-0.808736	-0.652324	-0.479397	-0.746143	0	0.272448	-0.7955	-0.754324	-0.388358	-0.646061	DIXDC1	DIXDC1	DIXDC1	DIXDC1.L	DIXDC1A	DIXDC1A			DIXC1_HUMAN;DIXDC1	PUTATIVE DIXIN-LIKE;PUTATIVE DIXIN;DIXDC1	DIXC1_HUMAN	DIXIN
2425	PORTHOMCL2425[AjBfCgCiDrGgLvMmOjOlPsSpXl|(20 genes, 13 taxa)]:	0.434945	-0.769714	-0.11978	0.134632	0.295895	-0.557201	-0.904662	0.587203	-0.626471	-0.811538	-0.500123	-0.646044	RIC8A	RIC8A	RIC8A	RIC8A.L;RIC8A	RIC8A;SI:DKEY-94F20.4	SI:CH211-195B15.7;RIC8A;SI:DKEY-94F20.4	SYNEMBRYN-A		RIC8A_DANRE;RIC8A	PUTATIVE SYNEMBRYN-A	RIC8A_DANRE;RIC8B_MOUSE;RIC8A	SYNEMBRYN-A;RIC8A
6690	PORTHOMCL6690[AjBfCgCiDrGgLvMmOjOlPsSpXl|(13 genes, 13 taxa)]:	-0.417418	-0.689978	-0.63989	0.032402	0.548162	-0.521822	-0.333169	-0.608322	-0.691824	-0.667637	-0.578064	-0.645841	ISPD;CRPPA	ISPD;CRPPA	ISPD;CRPPA	ISPD.L;CRPPA	ISPD	ISPD	ISOPRENOID SYNTHASE DOMAIN-CONTAINING PROTEIN-LIKE, TRANSCRIPT VARIANT X2; ISOPRENOID SYNTHASE DOMAIN-CONTAINING PROTEIN-LIKE, TRANSCRIPT VARIANT X1;CRPPA	CRPPA	ISPD_XENTR	PUTATIVE ISOPRENOID SYNTHASE DOMAIN-CONTAINING PROTEIN-LIKE	ISPD_XENTR	ISOPRENOID SYNTHASE DOMAIN-CONTAINING PROTEIN;ISPD
731	PORTHOMCL731[AjBfCgCiDrGgLvMmOjOlSpXl|(34 genes, 12 taxa)]:	0.00774725	0	0.124341	-0.414339	-0.000416667	-0.352183	-0.701325	0.359231	-0.905265	-0.479684	-0.551593	-0.645514	HYKK		HYKK	HYKK.L;HYKK	HYKK.1;HYKK	HYKK.2;HYKK.1;HYKK	HYDROXYLYSINE KINASE-LIKE;HYDROXYLYSINE KINASE, TRANSCRIPT VARIANT X2; HYDROXYLYSINE KINASE, TRANSCRIPT VARIANT X1;HYDROXYLYSINE KINASE-LIKE, TRANSCRIPT VARIANT X2; HYDROXYLYSINE KINASE-LIKE, TRANSCRIPT VARIANT X4; HYDROXYLYSINE KINASE-LIKE, TRANSCRIPT VARIANT X3	HYKK	HYKK_XENLA;HYKK_HUMAN	PUTATIVE HYDROXYLYSINE KINASE;HYPOTHETICAL PROTEIN;PUTATIVE HYDROXYLYSINE KINASE-LIKE	HYKK_HUMAN	HYDROXYLYSINE KINASE, TRANSCRIPT VARIANT X1; HYDROXYLYSINE KINASE, TRANSCRIPT VARIANT X2
4817	PORTHOMCL4817[AjBfCgCiDrGgLvMmOjOlPsSpXl|(15 genes, 13 taxa)]:	-0.506264	-0.570388	0	-0.489597	-0.479534	0.1575	-0.877532	-0.623844	-0.688618	-0.552842	-0.694666	-0.645375	HENMT1	HENMT1	HENMT1	HENMT1.L;HENMT1	HENMT1	HENMT1	SMALL RNA 2'-O-METHYLTRANSFERASE-LIKE, TRANSCRIPT VARIANT X2; SMALL RNA 2'-O-METHYLTRANSFERASE-LIKE, TRANSCRIPT VARIANT X1		HENMT_XENTR	PUTATIVE SMALL RNA 2'-O-METHYLTRANSFERASE-LIKE	HENMT_MOUSE;HENMT_XENTR	UNCHARACTERIZED LOC100893990;UNCHARACTERIZED LOC589300
3961	PORTHOMCL3961[AjBfCgCiDrGgLvMmOjOlPsSpXl|(16 genes, 13 taxa)]:	-0.402637	-0.321538	-0.611374	0.389118	0.0665686	-0.388206	-0.802325	-0.801119	-0.753853	-0.747946	-0.434314	-0.645371	PGAM5	PGAM5	PGAM5	PGAM5.L;PGAM5.S;PGAM5	PGAM5	PGAM5	SERINE/THREONINE-PROTEIN PHOSPHATASE PGAM5, MITOCHONDRIAL-LIKE;PGAM5		PGAM5_RAT;PGAM5	PUTATIVE SERINE/THREONINE-PROTEIN PHOSPHATASE PGAM5;PGAM5	PGAM5_DANRE	SERINE/THREONINE-PROTEIN PHOSPHATASE PGAM5, MITOCHONDRIAL, TRANSCRIPT VARIANT X2; SERINE/THREONINE-PROTEIN PHOSPHATASE PGAM5, MITOCHONDRIAL, TRANSCRIPT VARIANT X1;PGAM5
8170	PORTHOMCL8170[CgLvMmOjOlPsSpXl|(11 genes, 8 taxa)]:	0	0.247956	-0.74044	-0.0153922	-0.386054	0	0	0	-0.767353	-0.36516	-0.802083	-0.644865		SBNO2	SBNO1	SBNO1.S;SBNO2.S;SBNO1	SBNO1;SI:CH73-63E15.2;SBNO2				SBNO1_CHICK		SBNO1_CHICK	PROTEIN STRAWBERRY NOTCH HOMOLOG 1, TRANSCRIPT VARIANT X2; PROTEIN STRAWBERRY NOTCH HOMOLOG 1, TRANSCRIPT VARIANT X3; PROTEIN STRAWBERRY NOTCH HOMOLOG 1, TRANSCRIPT VARIANT X1
628	PORTHOMCL628[AjBfCgCiDrGgLvMmOjOlPsSpXl|(37 genes, 13 taxa)]:	0.17022	-0.581231	-0.658462	0.24375	-0.680368	0.178441	-0.625831	-0.627622	-0.874265	-0.470898	-0.589216	-0.644793	CHSY1;CHSY3	CHSY1;CHSY3	CHSY1;CHSY3	CHSY1.S;LOC108717241;CHSY1.L;CHSY3.S;CHSY1;CHSY3	CHSY1;CHPF2	CHSY3;CHSY1	CHONDROITIN SULFATE SYNTHASE 1;CHONDROITIN SULFATE SYNTHASE 1-LIKE;CHONDROITIN SULFATE SYNTHASE 3-LIKE;CHONDROITIN SULFATE SYNTHASE SQV-5-LIKE	CHSY1;CHSS1;CHSY3	CHSS1_MOUSE;CHSY1	PUTATIVE CHONDROITIN SULFATE SYNTHASE 1;CHSY3	CHSS1_MOUSE;CHSS1_HUMAN	CHONDROITIN SULFATE SYNTHASE 1;CHSY1
2248	PORTHOMCL2248[AjBfCgCiDrGgLvMmOjOlPsSpXl|(20 genes, 13 taxa)]:	-0.419396	-0.757231	-0.347033	-0.268015	0.126446	0.685618	-0.894221	0.737762	-0.878088	-0.317337	-0.73701	-0.644145	PI4K2B;PI4K2A	PI4K2B	PI4K2A;PI4K2B	PI4K2B.S;PI4K2B.L;PI4K2A.L;PI4K2B;PI4K2A	PI4K2B;PI4K2A	PI4K2B;PI4K2A	PHOSPHATIDYLINOSITOL 4-KINASE TYPE 2-ALPHA-LIKE, TRANSCRIPT VARIANT X1; PHOSPHATIDYLINOSITOL 4-KINASE TYPE 2-ALPHA-LIKE, TRANSCRIPT VARIANT X2	PI4K2A	P4K2B_XENTR;PI4K2B	PUTATIVE PHOSPHATIDYLINOSITOL 4-KINASE TYPE 2-BETA	P4K2B_XENTR;PI4K2B	PHOSPHATIDYLINOSITOL 4-KINASE TYPE 2-BETA;PI4K2B
7434	PORTHOMCL7434[AjBfCgCiDrGgLvMmOjOlPsSp|(12 genes, 12 taxa)]:	-0.652637	-0.926154	-0.809286	0	0.212167	-0.22601	-0.673922	0.210779	-0.782706	-0.740846	-0.408578	-0.644044	KATNAL2	KATNAL2	KATNAL2		KATNAL2	KATNAL2	KATANIN P60 ATPASE-CONTAINING SUBUNIT A-LIKE 2, TRANSCRIPT VARIANT X1; KATANIN P60 ATPASE-CONTAINING SUBUNIT A-LIKE 2, TRANSCRIPT VARIANT X2;KATNAL2	KATNAL2	KATL2_XENTR;KATNAL2	PUTATIVE KATANIN P60 ATPASE-CONTAINING SUBUNIT A-LIKE 2;KATNAL2	KATL2_XENTR;KATNAL2	KATANIN P60 ATPASE-CONTAINING SUBUNIT A-LIKE 2;KATNAL2
5503	PORTHOMCL5503[AjBfCgCiDrGgLvMmOjOlPsSpXl|(14 genes, 13 taxa)]:	0.339725	0.0849231	0.228571	0.309216	0.154706	0.736118	-0.928519	-0.791189	-0.687324	-0.728854	-0.515686	-0.643955	UBE2J1	UBE2J1	UBE2J1	UBE2J1.S;UBE2J1.L;UBE2J1	UBE2J1	UBE2J1	UBIQUITIN-CONJUGATING ENZYME E2 J1-LIKE;UBE2J1		UB2J1_HUMAN;UBE2J1	PUTATIVE UBIQUITIN-CONJUGATING ENZYME E2 J1;UBE2J1		UBIQUITIN-CONJUGATING ENZYME E2 J1;UBE2J1
7070	PORTHOMCL7070[AjBfCiDrGgLvMmOjOlPsSpXl|(12 genes, 12 taxa)]:	-0.439176	-0.538505	-0.542692	-0.271961	0.144069	-0.353441	-0.742347	-0.808276	-0.806088	-0.354159	-0.771446	-0.643898	UTP18	UTP18	UTP18	UTP18.L;UTP18	UTP18, SMALL SUBUNIT PROCESSOME COMPONENT;UTP18	UTP18	U3 SMALL NUCLEOLAR RNA-ASSOCIATED PROTEIN 18 HOMOLOG;UTP18	UTP18	UTP18_MOUSE;UTP18	PUTATIVE U3 SMALL NUCLEOLAR RNA-ASSOCIATED PROTEIN 18-LIKE;UTP18	UTP18_MOUSE	U3 SMALL NUCLEOLAR RNA-ASSOCIATED PROTEIN 18 HOMOLOG;UTP18
2503	PORTHOMCL2503[AjBfCgCiDrGgLvMmOjOlPsSpXl|(19 genes, 13 taxa)]:	0.201464	0.0901099	0.479011	0.0187745	-0.0720588	0.373324	0.543675	-0.44958	-0.887088	-0.751723	-0.292525	-0.643779		ILVBL	ILVBL	ILVBL.L;ILVBL	ILVBL	ILVBL	ACETOLACTATE SYNTHASE-LIKE PROTEIN	ILVBL	ILVBL_DANRE;ILVBL	PUTATIVE ACETOLACTATE SYNTHASE-LIKE PROTEIN;PUTATIVE ACETOLACTATE SYNTHASE;HYPOTHETICAL PROTEIN;ILVBL	ILVBL_DANRE;ILVBL	ACETOLACTATE SYNTHASE-LIKE PROTEIN;ILVBL
4823	PORTHOMCL4823[AjBfCgCiDrGgLvMmOjOlPsSpXl|(15 genes, 13 taxa)]:	-0.0147253	-0.586813	-0.600165	0.421936	0.0542402	0.629882	-0.661844	-0.203846	-0.759971	-0.794097	-0.37598	-0.643349	UBE2S	UBE2S	UBE2S	UBE2S.L;UBE2S.S;UBE2S	UBE2S	UBE2S	UBIQUITIN-CONJUGATING ENZYME E2 S;UBE2S		UBE2S_BRAFL	PUTATIVE UBIQUITIN-CONJUGATING ENZYME E2 S-LIKE	UBE2S_BRAFL	UBIQUITIN-CONJUGATING ENZYME E2 S-LIKE
144	PORTHOMCL144[AjBfCgCiDrGgLvMmOjOlPsSpXl|(87 genes, 13 taxa)]:	0.359451	0.575648	0.523187	0.362181	-0.189755	-0.662824	-0.626494	-0.847413	-0.810971	-0.738803	-0.38027	-0.643348	ITGA8;ITGAV;ITGA3;ITGA6;ITGA7	ITGAV;ITGA8;ITGA5;ITGA7	ITGA8;ITGA5;ITGA6;ITGA3;ITGAV;ITGA7;ITGA2B	LOC108718824;ITGA7.L;ITGA5.L;ITGA2B.2.L;ITGA7.S;LOC108702994;LOC397842;ITGA7;ITGA5	ITGA8;ITGA5;INTEGRIN ALPHA-5;ITGA6B;ITGAV;ITGA7;ITGA6A;INTEGRIN ALPHA-6;ITGA3B	ITGA8;ITGAV;ITGA5;ITGA6A;ITGA10;ITGA6L;ITGA2B;ITGA3B;ITGA3A;ITGA6	INTEGRIN ALPHA-8;INTEGRIN ALPHA-6-LIKE;INTEGRIN ALPHA-7-LIKE;INTEGRIN ALPHA-2-LIKE		ITA6_CHICK;ITA6_HUMAN	ALPHA INTEGRIN SUBUNIT SU2;PUTATIVE ALPHAP INTEGRIN ISOFORM X1;PUTATIVE INTEGRIN ALPHA-9 ISOFORM X3;PUTATIVE INTEGRIN ALPHA-V;PUTATIVE INTEGRIN ALPHA-9 ISOFORM X2;PUTATIVE INTEGRIN ALPHA-6;HYPOTHETICAL PROTEIN;PUTATIVE INTEGRIN ALPHA-9-LIKE;PUTATIVE INTEGRIN ALPHA-6-LIKE ISOFORM X3	ITA8_MOUSE;ITA6_HUMAN;ITA8_HUMAN;ITA7_RAT;ITAV_MOUSE;ITA8_CHICK;ITGA8	ALPHAP INTEGRIN; ALPHAP INTEGRIN, TRANSCRIPT VARIANT X1;INTEGRIN ALPHA-6;INTEGRIN ALPHA-5
3608	PORTHOMCL3608[AjBfCgCiDrGgLvMmOjOlPsSpXl|(17 genes, 13 taxa)]:	0.405934	-0.564484	0.00516484	0.396936	-0.193897	-0.878647	-0.810013	0.731678	-0.653941	-0.763034	-0.512868	-0.643281	ARFGAP1	ARFGAP1	ARFGAP1	ARFGAP1.L;ARFGAP1.S;ARFGAP1	ARFGAP1	CABZ01117173.1;CABZ01091853.1;ARFGAP1	ADP-RIBOSYLATION FACTOR GTPASE-ACTIVATING PROTEIN 1		TAF2_CHICK;ARFGAP1	PUTATIVE ADP-RIBOSYLATION FACTOR GTPASE-ACTIVATING PROTEIN 1	ARFG1_HUMAN	ADP-RIBOSYLATION FACTOR GTPASE-ACTIVATING PROTEIN 1
4571	PORTHOMCL4571[AjBfCgCiDrLvMmOjOlPsSpXl|(15 genes, 12 taxa)]:	0	0	0.190549	-0.42049	-0.793456	-0.0489412	-0.674662	0	-0.789529	-0.900206	-0.238971	-0.642902		ABHD16B;ABHD16A	ABHD16A;ABHD16B	ABHD16A.S;ABHD16A.L;ABHD16A	ABHD16A	ABHD16A	PROTEIN ABHD16A-LIKE;ABHD16A	ABHD16A	ABHGA_HUMAN;ABHD16A	HYPOTHETICAL PROTEIN	ABHGA_RAT;ABHGA_BOVIN;ABHD16A	ABHYDROLASE DOMAIN-CONTAINING PROTEIN 16A;ABHD16A
3212	PORTHOMCL3212[AjBfCgCiDrGgLvMmOjOlPsSpXl|(17 genes, 13 taxa)]:	-0.0201648	-0.614242	-0.702418	0.346324	0.0184069	0.575	-0.834584	-0.847184	-0.878971	-0.640681	-0.408946	-0.642866	SETDB1	SETDB1	SETDB1	SETDB1.S;SETDB1.L;SETDB1	SETDB1B	SETDB1B;SETDB1A	HISTONE-LYSINE N-METHYLTRANSFERASE SETDB1-LIKE, TRANSCRIPT VARIANT X2; HISTONE-LYSINE N-METHYLTRANSFERASE SETDB1-LIKE, TRANSCRIPT VARIANT X4; HISTONE-LYSINE N-METHYLTRANSFERASE SETDB1-LIKE, TRANSCRIPT VARIANT X5; HISTONE-LYSINE N-METHYLTRANSFERASE SETDB1-LIKE, TRANSCRIPT VARIANT X3; HISTONE-LYSINE N-METHYLTRANSFERASE SETDB1-LIKE, TRANSCRIPT VARIANT X1		STB1B_DANRE	PUTATIVE HISTONE-LYSINE N-METHYLTRANSFERASE SETDB1-LIKE ISOFORM X6;PUTATIVE HISTONE-LYSINE N-METHYLTRANSFERASE, SETB1	SETB1_HUMAN	HISTONE-LYSINE N-METHYLTRANSFERASE SETDB1;UNCHARACTERIZED LOC764341
3588	PORTHOMCL3588[AjBfCgCiDrGgLvMmOjOlPsSpXl|(17 genes, 13 taxa)]:	-0.158626	0.0409705	0.231455	0.498091	0.366045	0.783929	-0.681286	0.764056	-0.689088	-0.707492	-0.53125	-0.64261	FKBP6	FKBP6	FKBP6	FKBP6.L;FKBP6	FKBP6	FKBP6;FKBP6 (1 OF MANY)	INACTIVE PEPTIDYL-PROLYL CIS-TRANS ISOMERASE FKBP6, TRANSCRIPT VARIANT X1; INACTIVE PEPTIDYL-PROLYL CIS-TRANS ISOMERASE FKBP6, TRANSCRIPT VARIANT X2		FKBP6_HORSE	PUTATIVE INACTIVE PEPTIDYL-PROLYL CIS-TRANS ISOMERASE FKBP6;PUTATIVE PEPTIDYL-PROLYL CIS-TRANS ISOMERASE FKBP6-LIKE	FKBP6_HORSE	INACTIVE PEPTIDYL-PROLYL CIS-TRANS ISOMERASE FKBP6
1154	PORTHOMCL1154[AjBfCgCiDrGgLvMmOjOlPsSpXl|(27 genes, 13 taxa)]:	0	-0.650725	-0.428202	0.325587	0.313407	-0.563103	-0.785312	-0.131958	-0.690265	-0.676698	-0.560393	-0.642452	KIF6		KIF6	LOC108716514	KIF6	KIF6	KINESIN-LIKE PROTEIN KIF6;KIF6		KIF6_HUMAN	PUTATIVE KINESIN-LIKE PROTEIN KIF6	KIF6_HUMAN	KINESIN-LIKE PROTEIN KIF6;UNCHARACTERIZED LOC763216
5824	PORTHOMCL5824[AjBfCgCiDrGgLvMmOjOlPsSpXl|(14 genes, 13 taxa)]:	-0.145055	-0.361538	-0.539725	0.404363	0.0221814	-0.650441	0.411403	0.0668531	-0.8335	-0.801775	-0.291299	-0.642191	EEF1E1	EEF1E1	EEF1E1	EEF1E1.L;EEF1E1	EEF1E1	EEF1E1	EUKARYOTIC TRANSLATION ELONGATION FACTOR 1 EPSILON-1-LIKE	EEF1E1	MCA3_MOUSE;EEF1E1	PUTATIVE EUKARYOTIC TRANSLATION ELONGATION FACTOR 1 EPSILON-1	MCA3_CRIGR;EEF1E1	EUKARYOTIC TRANSLATION ELONGATION FACTOR 1 EPSILON-1;EEF1E1
4828	PORTHOMCL4828[AjBfCgCiDrGgLvMmOjOlPsSpXl|(15 genes, 13 taxa)]:	-0.76956	-0.802681	0.641374	0.382402	-0.0567402	-0.790092	-0.797675	-0.44021	-0.784324	-0.512921	-0.628922	-0.642055	PARP16	PARP16	PARP16	PARP16.L;PARP16	PARP16	PARP16	MONO [ADP-RIBOSE] POLYMERASE PARP16;PARP16	PARP16	PAR16_RAT;PARP16	PUTATIVE MONO;PARP16	PAR16_RAT;PARP16	MONO [ADP-RIBOSE] POLYMERASE PARP16;PARP16
2813	PORTHOMCL2813[AjBfCgCiDrGgLvMmOjOlPsSpXl|(18 genes, 13 taxa)]:	-0.47011	-0.789055	-0.551813	-0.214191	-0.459632	-0.225265	-0.765727	-0.440909	-0.7285	-0.512033	-0.684191	-0.641575	RIOK1	RIOK1	RIOK1	LOC108720060;RIOK1.L;RIOK1	RIOK1	RIOK1	SERINE/THREONINE-PROTEIN KINASE RIO1-LIKE;RIOK1	RIOK1	RIOK1_HUMAN;RIOK1	PUTATIVE SERINE/THREONINE-PROTEIN KINASE RIO1;RIOK1	RIOK1_HUMAN;RIOK1	SERINE/THREONINE-PROTEIN KINASE RIO1;RIOK1
2107	PORTHOMCL2107[AjBfCgCiDrGgLvMmOjOlPsSpXl|(21 genes, 13 taxa)]:	-0.503956	-0.802022	-0.602198	0.403554	0.12549	0.304676	-0.836714	0	-0.394441	-0.830526	-0.698897	-0.641288	CEP57;CEP57L1	CEP57;CEP57L1	CEP57;CEP57L1	CEP57.S;CEP57.L;CEP57L1.L;CEP57;CEP57L1	CEP57L1	CEP57L1	CENTROSOMAL PROTEIN OF 57 KDA-LIKE, TRANSCRIPT VARIANT X2; CENTROSOMAL PROTEIN OF 57 KDA-LIKE, TRANSCRIPT VARIANT X1		CEP57_MOUSE	PUTATIVE CENTROSOMAL PROTEIN	CEP57_HUMAN;CEP57_RAT;CEP57;CEP57L1	CENTROSOMAL PROTEIN OF 57 KDA;CEP57
1558	PORTHOMCL1558[AjBfCgCiDrGgLvMmOjOlPsSpXl|(24 genes, 13 taxa)]:	0.166868	-0.600967	-0.42456	0.340245	0.597941	0.398147	-0.83839	-0.667413	-0.696941	-0.753003	-0.472917	-0.640954	HOOK3;HOOK1	HOOK3;HOOK1	HOOK3;HOOK1	HOOK3.L;LOC445863;HOOK1.S;HOOK3;HOOK1	HOOK3;HOOK1	HOOK1;HOOK2	PROTEIN HOOK HOMOLOG 3;HOOK3	HOOK3	HOOK3_HUMAN;HOOK_BRAFL;HOOK3	HYPOTHETICAL PROTEIN	HOOK3_HUMAN	PROTEIN HOOK HOMOLOG 3;HOOK3
3372	PORTHOMCL3372[AjBfCgCiDrGgLvMmOjOlPsSpXl|(17 genes, 13 taxa)]:	0.721429	-0.32633	0.547692	0.277966	0.546544	-0.602588	-0.350377	0.227413	-0.602912	-0.738762	-0.581127	-0.640934	SLC25A19	SLC25A19	SLC25A19	SLC25A19.L;SLC25A19	SLC25A19	SLC25A19	MITOCHONDRIAL THIAMINE PYROPHOSPHATE CARRIER-LIKE;SLC25A19	SLC25A19	TPC_HUMAN;SLC25A19	PUTATIVE MITOCHONDRIAL THIAMINE PYROPHOSPHATE CARRIER;SLC25A19	TPC_BOVIN;SLC25A19	MITOCHONDRIAL THIAMINE PYROPHOSPHATE CARRIER;MITOCHONDRIAL THIAMINE PYROPHOSPHATE CARRIER-LIKE;SLC25A19
7458	PORTHOMCL7458[AjBfCgCiDrGgLvOjPsSpXl|(12 genes, 11 taxa)]:	-0.256593	-0.555385	0	-0.217421	0	0.733147	-0.566403	-0.793706	-0.702971	-0.7142	-0.504534	-0.640568	CTNNA1	CTNNA1		LOC108706501		CTNNA1	UNCHARACTERIZED LOC100184888		CTNA2_CHICK	HYPOTHETICAL PROTEIN	CTNA_DROME	UNCHARACTERIZED LOC100889191
5012	PORTHOMCL5012[AjCgCiDrGgLvMmOjOlPsSpXl|(15 genes, 12 taxa)]:	-0.373297	-0.642769	-0.353681	-0.505172	-0.740245	0.295765	-0.857247	0	-0.898382	-0.542931	-0.48027	-0.640528	SRM	SRM	SRM	SRM.L;SRM	SRM	SRM	SPERMIDINE SYNTHASE;SPERMIDINE SYNTHASE-LIKE;SRM		SPEE_MOUSE;SRM	PUTATIVE SPERMIDINE SYNTHASE;SPERMIDINE SYNTHASE;SRM	SPEE_HUMAN	SPERMIDINE SYNTHASE;SRM
4533	PORTHOMCL4533[AjBfCgCiDrGgLvMmOjPsSpXl|(15 genes, 12 taxa)]:	-0.463846	-0.641626	-0.515659	-0.524142	0	-0.117676	-0.809766	0.225944	-0.923706	-0.469866	-0.527941	-0.640504	SDAD1	SDAD1	SDAD1	SDAD1.S		SDAD1	PROTEIN SDA1 HOMOLOG, TRANSCRIPT VARIANT X2; PROTEIN SDA1 HOMOLOG, TRANSCRIPT VARIANT X1		SDA1_HUMAN	HYPOTHETICAL PROTEIN	SDA1_HUMAN	PROTEIN SDA1 HOMOLOG
5817	PORTHOMCL5817[AjBfCgCiDrGgLvMmOjOlPsSpXl|(14 genes, 13 taxa)]:	-0.465055	-0.745495	-0.549011	-0.219265	0.115245	0.383471	-0.862364	0.31042	-0.680059	-0.832363	-0.408946	-0.640456	DDX20	DDX20	DDX20	DDX20.L;DDX20	DDX20	DDX20	PROBABLE ATP-DEPENDENT RNA HELICASE DDX20, TRANSCRIPT VARIANT X2; PROBABLE ATP-DEPENDENT RNA HELICASE DDX20, TRANSCRIPT VARIANT X1		DDX20_DANRE	HYPOTHETICAL PROTEIN	DDX20_DANRE;DDX20	UNCHARACTERIZED LOC588813
4128	PORTHOMCL4128[AjBfCgCiDrGgLvMmOjOlPsSpXl|(16 genes, 13 taxa)]:	-0.170989	-0.58356	0.103846	-0.502745	0.359387	0.758088	-0.888156	0.0788811	-0.800765	-0.570877	-0.549632	-0.640425	GID8	GID8	GID8	GID8.L	GID8 (1 OF MANY);GID8B	GID8B;GID8A;GID8 (1 OF MANY)	GLUCOSE-INDUCED DEGRADATION PROTEIN 8 HOMOLOG	GID8	GID8_MOUSE;GID8	PUTATIVE GLUCOSE-INDUCED DEGRADATION PROTEIN 8-LIKE	GID8_HUMAN;GID8	GLUCOSE-INDUCED DEGRADATION PROTEIN 8 HOMOLOG;GID8
4609	PORTHOMCL4609[AjBfCgCiDrGgLvMmOjOlPsSpXl|(15 genes, 13 taxa)]:	-0.0385714	0.200659	0.365769	-0.241765	-0.309583	-0.536353	-0.692571	-0.637444	-0.519029	-0.800537	-0.601471	-0.640346	FBXO9	FBXO9	FBXO9	FBXO9.L;FBXO9.S;FBXO9	FBXO9	FBXO9	F-BOX ONLY PROTEIN 9-LIKE;FBXO9	FBXO9	FBX9_RAT;FBXO9	PUTATIVE F-BOX ONLY PROTEIN 9-LIKE;FBXO9	FBX9_DANRE	F-BOX ONLY PROTEIN 9
3524	PORTHOMCL3524[AjBfCgCiDrGgLvMmOjOlPsSpXl|(17 genes, 13 taxa)]:	0.043022	-0.82444	-0.657527	-0.175931	0.233309	0.129588	-0.812883	0.397225	-0.534206	-0.769886	-0.614828	-0.63964	TRIM37	TRIM37	TRIM37	TRIM37.S;TRIM37.L;TRIM37	TRIM37	TRIM37	ZINC FINGER PROTEIN;TRIM37		TRI37_MOUSE;TRI37_HUMAN;TRIM37	HYPOTHETICAL PROTEIN	TRI37_HUMAN;TRIM37	E3 UBIQUITIN-PROTEIN LIGASE TRIM37;TRIM37
3857	PORTHOMCL3857[AjBfCgCiDrGgLvMmOjOlPsSpXl|(16 genes, 13 taxa)]:	-0.585824	-0.818242	-0.543736	0.182304	-0.0438971	0.5885	-0.569896	-0.36993	-0.883235	-0.338142	-0.696814	-0.639397	DUT	DUT	DUT	LOC108712910;DUT.L	DUT	CABZ01074745.1;DUT	DEOXYURIDINE 5'-TRIPHOSPHATE NUCLEOTIDOHYDROLASE-LIKE, TRANSCRIPT VARIANT X2; DEOXYURIDINE 5'-TRIPHOSPHATE NUCLEOTIDOHYDROLASE-LIKE, TRANSCRIPT VARIANT X1;DUT	DUT	DUT_HUMAN	PUTATIVE DEOXYURIDINE 5'-TRIPHOSPHATE NUCLEOTIDOHYDROLASE-LIKE ISOFORM X1;DUT	DUT_RAT	DEOXYURIDINE 5'-TRIPHOSPHATE NUCLEOTIDOHYDROLASE;DUT
5641	PORTHOMCL5641[AjBfCgCiDrGgLvMmOjOlPsSpXl|(14 genes, 13 taxa)]:	-0.299011	0.349978	0.236538	-0.0754657	-0.526373	-0.596647	-0.115416	0.143007	-0.674824	-0.57872	-0.664583	-0.639376	PSAT1	PSAT1	PSAT1	LOC108706978;PSAT1.L;PSAT1	PSAT1	PSAT1	PHOSPHOSERINE AMINOTRANSFERASE-LIKE;PSAT1	PSAT1	SERC_MOUSE;PSAT1	PUTATIVE PHOSPHOSERINE AMINOTRANSFERASE-LIKE ISOFORM X1;PSAT1	SERC_MOUSE;PSAT1	PHOSPHOSERINE AMINOTRANSFERASE;PSAT1
2325	PORTHOMCL2325[AjBfCgDrGgLvMmOjOlPsSpXl|(20 genes, 12 taxa)]:	0.104505	0.538154	0.263297	-0.227475	0.427598	0.193412	0	-0.560584	-0.811971	-0.674384	-0.431495	-0.639283	AGPAT2;AGPAT1	AGPAT2	AGPAT1;AGPAT2	AGPAT1.S;AGPAT1.L;AGPAT2.S;AGPAT1	AGPAT2	AGPAT2		AGPAT1	PLCB_HUMAN;PLCA_HUMAN	PUTATIVE 1-ACYL-SN-GLYCEROL-3-PHOSPHATE ACYLTRANSFERASE ALPHA	PLCA_HUMAN	1-ACYL-SN-GLYCEROL-3-PHOSPHATE ACYLTRANSFERASE ALPHA;AGPAT2
1749	PORTHOMCL1749[AjBfCgCiDrGgLvMmOjOlPsSpXl|(23 genes, 13 taxa)]:	-0.503297	-0.758681	-0.89467	-0.53348	0.167255	-0.727412	-0.819961	0.845455	-0.881412	-0.548524	-0.487868	-0.639268	FARP2;FARP1	FARP1	FARP2;FARP1	LOC108709752;LOC108708478;FARP1	FARP2;FARP1 (1 OF MANY);FARP1	FARP1;FO704845.2	FERM, RHOGEF AND PLECKSTRIN DOMAIN-CONTAINING PROTEIN 1-LIKE;FARP1		FARP1_MOUSE	PUTATIVE FERM, RHOGEF AND PLECKSTRIN DOMAIN-CONTAINING PROTEIN 1-LIKE;PUTATIVE FERM, RHOGEF AND PLECKSTRIN DOMAIN-CONTAINING PROTEIN 2;FARP2	FARP1_MOUSE	FERM, RHOGEF AND PLECKSTRIN DOMAIN-CONTAINING PROTEIN 1-LIKE;FERM, RHOGEF AND PLECKSTRIN DOMAIN-CONTAINING PROTEIN 1
5163	PORTHOMCL5163[AjBfCgDrGgLvMmOjOlPsSpXl|(14 genes, 12 taxa)]:	-0.323791	-0.797626	-0.563846	0.125025	0.119142	0.384559	0	0.374991	-0.768324	-0.461306	-0.687377	-0.639002	PMS1	PMS1	PMS1	PMS1.S;PMS1	PMS1	PMS1		PMS1	PMS1_HUMAN	PUTATIVE PMS1 PROTEIN-LIKE 1		PMS1 PROTEIN HOMOLOG 1
10912	PORTHOMCL10912[AjGgLvOjOlSp|(7 genes, 6 taxa)]:	-0.155604	0	0	0	-0.913897	0	0	0	-0.720706	-0.716512	-0.479534	-0.638917					WDR35				WDR35_RAT;WDR35	PUTATIVE WD REPEAT-CONTAINING PROTEIN 35 ISOFORM X2	WDR35_RAT	WD REPEAT-CONTAINING PROTEIN 35, TRANSCRIPT VARIANT X3; WD REPEAT-CONTAINING PROTEIN 35, TRANSCRIPT VARIANT X1; WD REPEAT-CONTAINING PROTEIN 35, TRANSCRIPT VARIANT X2;WDR35
4056	PORTHOMCL4056[AjBfCgCiDrGgLvOjOlPsSpXl|(16 genes, 12 taxa)]:	0.239877	0.719912	0	0.715074	-0.250049	0.179824	-0.641	0.838671	-0.869412	-0.760165	-0.286029	-0.638535				DNZ1.L	ZGC:77880	ZGC:77880	PALMITOYLTRANSFERASE ZDHHC3		ZDHC3_MOUSE	PUTATIVE PALMITOYLTRANSFERASE ZDHHC7	ZDHC7_RAT	PALMITOYLTRANSFERASE ZDHHC7
1689	PORTHOMCL1689[AjBfCgCiDrGgLvMmOjOlPsSpXl|(23 genes, 13 taxa)]:	-0.325275	-0.543165	-0.522253	0.237274	-0.464436	-0.239618	-0.695065	-0.678392	-0.806588	-0.658844	-0.448039	-0.637824	THOP1;NLN	THOP1;NLN	THOP1;NLN	THOP1.L	THOP1;NLN	THOP1;NLN	THIMET OLIGOPEPTIDASE, TRANSCRIPT VARIANT X1; THIMET OLIGOPEPTIDASE, TRANSCRIPT VARIANT X2;THOP1	THOP1;PRLC	THOP1_MOUSE;COPDA_ARATH;THOP1;PRLC	PUTATIVE THIMET OLIGOPEPTIDASE-LIKE;PUTATIVE ORGANELLAR OLIGOPEPTIDASE A, CHLOROPLASTIC/MITOCHONDRIAL-LIKE;THOP1;PRLC	THOP1_MOUSE;THOP1	THIMET OLIGOPEPTIDASE-LIKE
9266	PORTHOMCL9266[AjBfCgCiLvOjSp|(9 genes, 7 taxa)]:	0	0	0	0	0	0	-0.906221	-0.908322	-0.552206	-0.754592	-0.605899	-0.637566							HAUS AUGMIN-LIKE COMPLEX SUBUNIT 8, TRANSCRIPT VARIANT X1; HAUS AUGMIN-LIKE COMPLEX SUBUNIT 8, TRANSCRIPT VARIANT X2;LOC100186201			HYPOTHETICAL PROTEIN	HAUS8_HUMAN	UNCHARACTERIZED SERINE-RICH PROTEIN C215.13
832	PORTHOMCL832[AjBfCgCiDrGgLvMmOjOlPsSpXl|(32 genes, 13 taxa)]:	-0.323626	-0.300967	-0.554231	-0.582623	0.618039	0.282	-0.898208	-0.80021	-0.5745	-0.729701	-0.608211	-0.637471	FEM1B;FEM1C	FEM1C;FEM1A	FEM1C	LOC108712797;FEM1C.L;FEM1B	FEM1C	FEM1B;FEM1C;FEM1A	PROTEIN FEM-1 HOMOLOG B-LIKE;PROTEIN FEM-1 HOMOLOG CG6966-LIKE;FEM1B	FEM1B	FEM1C_XENLA;FEM1C	HYPOTHETICAL PROTEIN;FEM1B;FEM1A	FEM1C_MOUSE;FEM1C	PROTEIN FEM-1 HOMOLOG C-LIKE;PROTEIN FEM-1 HOMOLOG B-LIKE, TRANSCRIPT VARIANT X2; PROTEIN FEM-1 HOMOLOG B-LIKE, TRANSCRIPT VARIANT X1;PROTEIN FEM-1 HOMOLOG B-LIKE, TRANSCRIPT VARIANT X1; PROTEIN FEM-1 HOMOLOG B-LIKE, TRANSCRIPT VARIANT X2;ANKYRIN REPEAT DOMAIN-CONTAINING PROTEIN 50-LIKE;FEM1C
2892	PORTHOMCL2892[AjBfCgCiDrGgLvMmOjOlPsSpXl|(18 genes, 13 taxa)]:	-0.618791	-0.638681	-0.54989	0.291887	-0.124706	0.6475	-0.557948	-0.245035	-0.476382	-0.838328	-0.596814	-0.637175	UNG	UNG	UNG	UNG.L;UNG	UNGA;UNG	UNGA;UNGB;UNG	URACIL-DNA GLYCOSYLASE, TRANSCRIPT VARIANT X2; URACIL-DNA GLYCOSYLASE, TRANSCRIPT VARIANT X1;UNG	UNG	UNG_MOUSE;UNG	PUTATIVE URACIL-DNA GLYCOSYLASE ISOFORM X2;PUTATIVE URACIL-DNA GLYCOSYLASE;UNG	UNG_MOUSE	URACIL-DNA GLYCOSYLASE;UNG
512	PORTHOMCL512[AjBfCgCiDrGgLvMmOjOlPsSpXl|(42 genes, 13 taxa)]:	-0.413462	0.0752088	0.338407	-0.546765	-0.76695	-0.768723	0.103753	-0.232517	-0.716441	-0.807595	-0.387255	-0.637097	LAMA1;LAMA2	LAMA5;GAS6	LAMA5	LAMA5.L;LOC108702189;LOC108717424;LAMA5;LAMA4	LAMA5;LAMA3	LAMA5;LAMA4	LAMININ SUBUNIT ALPHA-5, TRANSCRIPT VARIANT X1; LAMININ SUBUNIT ALPHA-5, TRANSCRIPT VARIANT X3; LAMININ SUBUNIT ALPHA-5, TRANSCRIPT VARIANT X2; LAMININ SUBUNIT ALPHA-5, TRANSCRIPT VARIANT X4; LAMININ SUBUNIT ALPHA-5, TRANSCRIPT VARIANT X5		EPI1_CAEEL;LAMA_DROME	PUTATIVE LAMININ-LIKE PROTEIN EPI-1;PUTATIVE LAMININ SUBUNIT ALPHA;PUTATIVE LAMININ SUBUNIT ALPHA-5-LIKE;PUTATIVE LAMININ SUBUNIT ALPHA-LIKE	EPI1_CAEEL;LAMA_DROME	LAMININ-LIKE PROTEIN EPI-1;LAMININ SUBUNIT ALPHA;LAMININ SUBUNIT BETA-2-LIKE
4477	PORTHOMCL4477[AjBfCgCiDrGgLvMmOjOlPsSpXl|(15 genes, 13 taxa)]:	-0.38533	-0.857934	-0.541868	-0.0549265	0.115196	0.0377941	-0.884857	-0.349371	-0.787441	-0.42	-0.703309	-0.636917	MTRR	MTRR	MTRR	LOC108719055;MTRR	MTRR	MTRR	METHIONINE SYNTHASE REDUCTASE-LIKE;MTRR		MTRR_MOUSE;MTRR_HUMAN	PUTATIVE METHIONINE SYNTHASE REDUCTASE ISOFORM X2;MTRR	MTRR_MOUSE;MTRR	METHIONINE SYNTHASE REDUCTASE, TRANSCRIPT VARIANT X3; METHIONINE SYNTHASE REDUCTASE, TRANSCRIPT VARIANT X2; METHIONINE SYNTHASE REDUCTASE, TRANSCRIPT VARIANT X1;MTRR
2312	PORTHOMCL2312[AjBfCgCiDrGgLvMmOjOlPsSpXl|(20 genes, 13 taxa)]:	-0.518736	0.221582	-0.881374	0.0754412	0.344534	0.108088	-0.294519	0.301888	-0.644441	-0.770444	-0.495833	-0.636906	MARCH5	MARCH5	MARCH5	MARCH5.L;LOC108697401;MARCH5	MARCH5;MARCH5L	MARCH5;MARCH5L	E3 UBIQUITIN-PROTEIN LIGASE MARCH5;MARCH5	MARCH5	MARH5_CHICK;MARCH5	PUTATIVE E3 UBIQUITIN-PROTEIN LIGASE MARCH5 ISOFORM X2;MARCH5	MARH5_MOUSE;MARCH5	E3 UBIQUITIN-PROTEIN LIGASE MARCH5, TRANSCRIPT VARIANT X2; E3 UBIQUITIN-PROTEIN LIGASE MARCH5, TRANSCRIPT VARIANT X1;MARCH5
7220	PORTHOMCL7220[AjBfDrGgLvMmOjOlPsSpXl|(12 genes, 11 taxa)]:	0.137088	-0.388659	-0.395	0.341716	-0.132862	-0.148882	0	0.404406	-0.878649	-0.597688	-0.433456	-0.636598	CCNG2	CCNG2	CCNG2	CCNG2.S	CCNG2	CCNG2			CCNG1_RAT	PUTATIVE CYCLIN-G1	CCNG2_HUMAN	CYCLIN-G1
5231	PORTHOMCL5231[AjBfCgCiDrLvMmOjOlPsSpXl|(14 genes, 12 taxa)]:	0	0.215516	-0.833077	-0.194387	0.0489951	0.0627353	0.630623	-0.862735	-0.835794	-0.326605	-0.746324	-0.636241		TTC5	TTC5	TTC5.L;LOC108707043;TTC5	TTC5	TTC5	TETRATRICOPEPTIDE REPEAT PROTEIN 5-LIKE;TTC5	TTC5	TTC5_MOUSE;TTC5	PUTATIVE TETRATRICOPEPTIDE REPEAT PROTEIN 5 ISOFORM X1;PUTATIVE TETRATRICOPEPTIDE REPEAT PROTEIN 5 ISOFORM X3	TTC5_HUMAN	TETRATRICOPEPTIDE REPEAT PROTEIN 5, TRANSCRIPT VARIANT X1; TETRATRICOPEPTIDE REPEAT PROTEIN 5, TRANSCRIPT VARIANT X3; TETRATRICOPEPTIDE REPEAT PROTEIN 5, TRANSCRIPT VARIANT X2;TTC5
13616	PORTHOMCL13616[AjCgLvOjSp|(5 genes, 5 taxa)]:	0	0	0	0	0	0	0	0	-0.547176	-0.716285	-0.644118	-0.63586										HYPOTHETICAL PROTEIN		UNCHARACTERIZED LOC591573
10823	PORTHOMCL10823[AjBfCgLvOjSp|(7 genes, 6 taxa)]:	0	0	0	0	0	0	0	-0.435053	-0.706441	-0.7271	-0.473652	-0.635731									TDRD5_XENTR	HYPOTHETICAL PROTEIN;TUDOR DOMAIN-CONTAINING PROTEIN 5		UNCHARACTERIZED LOC100892920, TRANSCRIPT VARIANT X1; UNCHARACTERIZED LOC100892920, TRANSCRIPT VARIANT X3; UNCHARACTERIZED LOC100892920, TRANSCRIPT VARIANT X2
10863	PORTHOMCL10863[AjLvOjSp|(7 genes, 4 taxa)]:	0	0	0	0	0	0	0	0	-0.808854	-0.729317	-0.368995	-0.635722										HYPOTHETICAL PROTEIN	TSEAR_MOUSE;TECTA_HUMAN	UNCHARACTERIZED LOC100891537;UNCHARACTERIZED LOC100888867
3957	PORTHOMCL3957[AjBfCgCiDrGgLvMmOjOlPsSpXl|(16 genes, 13 taxa)]:	-0.478846	-0.841187	-0.714835	-0.284559	0.130241	-0.434147	-0.0517273	0.525741	-0.733912	-0.72258	-0.45	-0.635497	CDK5RAP2	CDK5RAP2	CDK5RAP2	CDK5RAP2.L;LOC108715740		ZGC:55582	MYOMEGALIN, TRANSCRIPT VARIANT X1; MYOMEGALIN, TRANSCRIPT VARIANT X4; MYOMEGALIN, TRANSCRIPT VARIANT X3; MYOMEGALIN, TRANSCRIPT VARIANT X2;LOC100183006		MYOME_HUMAN	PUTATIVE CENTROSOME-ASSOCIATED PROTEIN	CK5P2_PANTR	CENTROSOME-ASSOCIATED PROTEIN CEP250-LIKE, TRANSCRIPT VARIANT X1; CENTROSOME-ASSOCIATED PROTEIN CEP250-LIKE, TRANSCRIPT VARIANT X2; CENTROSOME-ASSOCIATED PROTEIN CEP250-LIKE, TRANSCRIPT VARIANT X3;CDK5 REGULATORY SUBUNIT-ASSOCIATED PROTEIN 2-LIKE
4720	PORTHOMCL4720[AjBfCgCiDrGgLvMmOjOlPsSpXl|(15 genes, 13 taxa)]:	0.631209	-0.755516	-0.62956	0.443039	-0.140784	-0.908353	-0.775675	0.0903329	-0.748588	-0.702691	-0.455091	-0.635457	ITFG2	ITFG2	ITFG2	ITFG2.L;ITFG2	ITFG2	ITFG2	INTEGRIN-ALPHA FG-GAP REPEAT-CONTAINING PROTEIN 2	ITFG2	ITFG2_MOUSE	PUTATIVE INTEGRIN-ALPHA FG-GAP REPEAT-CONTAINING PROTEIN 2-LIKE	ITFG2_MOUSE;ITFG2	INTEGRIN-ALPHA FG-GAP REPEAT-CONTAINING PROTEIN 2-LIKE;ITFG2
5491	PORTHOMCL5491[AjBfCgCiDrGgLvMmOjOlPsSpXl|(14 genes, 13 taxa)]:	0.264396	-0.453319	-0.658516	-0.0287745	0.592892	-0.120794	-0.792597	-0.764776	-0.693941	-0.784933	-0.426593	-0.635156	ZRANB1	ZRANB1	ZRANB1	ZRANB1.L;ZRANB1	ZRANB1B	ZRANB1B;ZRANB1A;ZRANB1	ZN-FINGER (RAN-BINDING)-3; ZN-FINGER (RAN-BINDING)-3, TRANSCRIPT VARIANT X1	ZRANB1	ZRAN1_MOUSE	PUTATIVE UBIQUITIN THIOESTERASE ZRANB1 ISOFORM X2	ZRAN1_XENTR	UBIQUITIN THIOESTERASE ZRANB1, TRANSCRIPT VARIANT X2; UBIQUITIN THIOESTERASE ZRANB1, TRANSCRIPT VARIANT X1; UBIQUITIN THIOESTERASE ZRANB1, TRANSCRIPT VARIANT X3
5242	PORTHOMCL5242[AjBfCgCiDrGgLvMmOjOlPsSpXl|(14 genes, 13 taxa)]:	-0.0934615	-0.542066	-0.571154	-0.139142	-0.0845098	0.374882	-0.788455	-0.477762	-0.851294	-0.753437	-0.300613	-0.635114	GFER	GFER	GFER	GFER.L;GFER	GFER	GFER	FAD-LINKED SULFHYDRYL OXIDASE ALR-LIKE;GFER	GFER	ALR_MOUSE;GFER	PUTATIVE FAD-LINKED SULFHYDRYL OXIDASE ALR-LIKE;GFER	ALR_MOUSE;GFER	FAD-LINKED SULFHYDRYL OXIDASE ALR-LIKE;GFER
739	PORTHOMCL739[AjBfCgCiDrGgLvMmOjOlPsSpXl|(34 genes, 13 taxa)]:	-0.501209	-0.526989	-0.315	-0.494069	0.779461	0.822647	0.292013	0.0132168	-0.852559	-0.747802	-0.304044	-0.634802	PPP1CB;PPP1CA;PPP1CC	PPP1CB;PPP1CA	PPP1CB	PPP1CB.L;PPP1CB.S;PPP1CB	PPP1CB;SERINE/THREONINE-PROTEIN PHOSPHATASE PP1-BETA CATALYTIC SUBUNIT	PPP1CB;PPP1CAB;PPP1CAA;PPP1CBL	SERINE/THREONINE-PROTEIN PHOSPHATASE PP1-BETA CATALYTIC SUBUNIT;PPP1CB	PPP1CB	PP1B_RAT;PPIG_XENTR;PPP1CB	SERINE/THREONINE-PROTEIN PHOSPHATASE PP1-BETA CATALYTIC SUBUNIT;PUTATIVE SERINE/THREONINE-PROTEIN PHOSPHATASE PP1;PUTATIVE SERINE/THREONINE-PROTEIN PHOSPHATASE PP1-ALPHA CATALYTIC SUBUNIT-LIKE;SERINE/THREONINE-PROTEIN PHOSPHATASE PP1-ALPHA CATALYTIC SUBUNIT;PPP1CC	PP11_DROME;PP1B_RAT	SERINE/THREONINE-PROTEIN PHOSPHATASE PP1-BETA CATALYTIC SUBUNIT, TRANSCRIPT VARIANT X2; SERINE/THREONINE-PROTEIN PHOSPHATASE PP1-BETA CATALYTIC SUBUNIT, TRANSCRIPT VARIANT X1;SERINE/THREONINE-PROTEIN PHOSPHATASE ALPHA-2 ISOFORM;PPP1CB;PPP1CA
10204	PORTHOMCL10204[GgLvMmOjOlSpXl|(8 genes, 7 taxa)]:	-0.294748	0	-0.591758	-0.197941	0.084951	0	0	0	-0.611794	-0.543509	-0.747794	-0.634366			SF3B3	SF3B3.S	SF3B3				SF3B3_DANRE		SF3B3_MOUSE	SPLICING FACTOR 3B SUBUNIT 3-LIKE
6223	PORTHOMCL6223[AjBfCgDrGgLvMmOjOlPsSpXl|(13 genes, 12 taxa)]:	0.388571	0.588088	-0.195385	-0.494657	0.331275	-0.632353	0	-0.609441	-0.878235	-0.704211	-0.320343	-0.634263	VPS37A	VPS37A	VPS37A	VPS37A.L;LOC100036869;VPS37A	VPS37A	VPS37A			VP37A_MOUSE	PUTATIVE VACUOLAR PROTEIN SORTING-ASSOCIATED PROTEIN 37A	VP37A_HUMAN	VACUOLAR PROTEIN SORTING-ASSOCIATED PROTEIN 37A
1921	PORTHOMCL1921[AjBfCgCiDrGgLvMmOjOlPsSpXl|(22 genes, 13 taxa)]:	-0.0786813	-0.230549	-0.812582	-0.0829902	0.435784	0.692176	-0.869532	-0.435455	-0.831647	-0.81839	-0.252696	-0.634244	STRN	STRN	STRN3;STRN;STRN4	STRN3.S;STRN.S;LOC108716119;STRN	STRN;STRN3	STRN;STRN3;STRN4	STRIATIN-3, TRANSCRIPT VARIANT X1; STRIATIN-3, TRANSCRIPT VARIANT X2;STRN	STRN	STRN3_MOUSE;STRN	HYPOTHETICAL PROTEIN	STRN3_MOUSE;STRN3	STRIATIN
4280	PORTHOMCL4280[BfCgCiDrGgLvMmOjOlPsSpXl|(16 genes, 12 taxa)]:	-0.496209	-0.543473	-0.546154	0.181863	0.13424	-0.0740294	-0.919844	0.660629	-0.808206	-0.278865	-0.815451	-0.634174	TOE1	TOE1	TOE1	TOE1.L;TOE1.S;TOE1	TOE1	TOE1	TARGET OF EGR1 PROTEIN 1-LIKE;TOE1	TOE1	TOE1_BOVIN		TOE1_PONAB	TARGET OF EGR1 PROTEIN 1;TOE1
9590	PORTHOMCL9590[BfDrLvMmOjOlSpXl|(9 genes, 8 taxa)]:	0	0	-0.648352	-0.79729	-0.700956	-0.317882	0	-0.423665	-0.709382	-0.758947	-0.433946	-0.634092			ADCK5	ADCK5.L;ADCK5	ADCK5	ADCK5			ADCK5_MOUSE;ADCK5		ADCK5_MOUSE;ADCK5	UNCHARACTERIZED AARF DOMAIN-CONTAINING PROTEIN KINASE 5;UNCHARACTERIZED AARF DOMAIN-CONTAINING PROTEIN KINASE 5-LIKE;ADCK5
7452	PORTHOMCL7452[AjBfCgCiDrGgLvMmOjOlPsSp|(12 genes, 12 taxa)]:	-0.432582	-0.603341	-0.525824	0	0.0144853	0.148529	-0.848935	-0.818944	-0.705676	-0.704685	-0.491912	-0.634091	CWF19L2	CWF19L2	CWF19L2		CWF19L2	CWF19L2	CWF19-LIKE PROTEIN 2;CWF19L2	CWF19L2	C19L2_XENTR;CWF19L2	PUTATIVE CWF19-LIKE PROTEIN 2-LIKE;CWF19L2	C19L2_DANRE;CWF19L2	CWF19-LIKE PROTEIN 2;CWF19L2
2288	PORTHOMCL2288[AjBfCgCiDrGgLvMmOjOlPsSpXl|(20 genes, 13 taxa)]:	-0.53544	-0.790945	-0.571044	0.356397	0.0577451	0.708176	-0.596455	-0.479077	-0.868824	-0.705077	-0.327819	-0.633907	TPR	TPR	TPR	TPR.S;TPR	TPRB;NUCLEOPROTEIN TPR;TPR;TPRA	TPRB;TPRA;TPR	NUCLEOPROTEIN TPR;LOC100185005		TPR_HUMAN;TPR	PUTATIVE NUCLEOPROTEIN TPR-LIKE	TPR_MOUSE;TPR_XENLA	NUCLEOPROTEIN TPR-LIKE;NUCLEOPROTEIN TPR
4882	PORTHOMCL4882[AjBfCgCiDrGgLvMmOjOlPsSpXl|(15 genes, 13 taxa)]:	0.00989011	-0.387516	-0.800989	0.429216	-0.202549	-0.142235	0.499338	-0.720521	-0.820176	-0.746398	-0.334804	-0.633793	SFSWAP	SFSWAP	SFSWAP	SFSWAP.S;SFSWAP.L;SFSWAP	SFSWAP	SFSWAP	SPLICING FACTOR, SUPPRESSOR OF WHITE-APRICOT HOMOLOG, TRANSCRIPT VARIANT X1; SPLICING FACTOR, SUPPRESSOR OF WHITE-APRICOT HOMOLOG, TRANSCRIPT VARIANT X4; SPLICING FACTOR, SUPPRESSOR OF WHITE-APRICOT HOMOLOG, TRANSCRIPT VARIANT X5; SPLICING FACTOR, SUPPRESSOR OF WHITE-APRICOT HOMOLOG, TRANSCRIPT VARIANT X2; SPLICING FACTOR, SUPPRESSOR OF WHITE-APRICOT HOMOLOG, TRANSCRIPT VARIANT X3		SFSWA_RAT	PUTATIVE SPLICING FACTOR, SUPPRESSOR OF WHITE-APRICOT-LIKE	SFSWA_HUMAN;SFSWAP	SPLICING FACTOR, SUPPRESSOR OF WHITE-APRICOT HOMOLOG
7441	PORTHOMCL7441[AjBfCgCiDrGgLvMmOjPsSpXl|(12 genes, 12 taxa)]:	0.0712637	-0.801055	-0.0227339	-0.393601	0	-0.193232	-0.52287	0.482028	-0.787235	-0.505986	-0.607475	-0.633565	CCDC103	CCDC103	CCDC103	CCDC103		CCDC103	COILED-COIL DOMAIN-CONTAINING PROTEIN 103-LIKE, TRANSCRIPT VARIANT X2; COILED-COIL DOMAIN-CONTAINING PROTEIN 103-LIKE, TRANSCRIPT VARIANT X1;CCDC103	CCDC103	CC103_XENTR;CCDC103	PUTATIVE COILED-COIL DOMAIN-CONTAINING PROTEIN;CCDC103	CC103_MOUSE	COILED-COIL DOMAIN-CONTAINING PROTEIN 103
4503	PORTHOMCL4503[AjBfCgCiDrGgLvMmOjOlPsSpXl|(15 genes, 13 taxa)]:	-0.28967	-0.542286	-0.594231	-0.179779	-0.16826	0.326529	0.167195	0	-0.643441	-0.611682	-0.645343	-0.633489	SNRNP200	SNRNP200	SNRNP200	SNRNP200.S;SNRNP200	SNRNP200	SNRNP200	U5 SMALL NUCLEAR RIBONUCLEOPROTEIN 200 KDA HELICASE;SNRNP200	SNRNP200	U520_HUMAN;SNRNP200	HYPOTHETICAL PROTEIN	U520_HUMAN;SNRNP200	U5 SMALL NUCLEAR RIBONUCLEOPROTEIN 200 KDA HELICASE-LIKE;U5 SMALL NUCLEAR RIBONUCLEOPROTEIN 200 KDA HELICASE;SNRNP200
5616	PORTHOMCL5616[AjBfGgLvMmOjOlPsSpXl|(14 genes, 10 taxa)]:	-0.133571	-0.605758	-0.943681	-0.404167	0.0533578	0	0	-0.764942	-0.877206	-0.740578	-0.28174	-0.633175	BRWD3	BRWD3;BRWD1	BRWD3;PHIP	PHIP.L	BRWD3;PHIP					PUTATIVE BROMODOMAIN AND WD REPEAT-CONTAINING PROTEIN 3-LIKE	BRWD3_HUMAN;BRWD1	PH-INTERACTING PROTEIN
1522	PORTHOMCL1522[AjBfCgCiDrGgLvMmOjOlPsSpXl|(24 genes, 13 taxa)]:	0.333571	-0.081011	-0.654396	-0.805025	0.399167	0.286294	-0.859234	-0.476434	-0.748882	-0.652446	-0.497794	-0.633041	FAM135A;FAM135B	FAM135A;FAM135B	FAM135A;FAM135B	LOC108716929;FAM135A.S;FAM135B.L;FAM135A	FAM135A;FAM135B	FAM135A;FAM135B	PROTEIN FAM135B-LIKE		F135A_PONAB	HYPOTHETICAL PROTEIN	F135A_PONAB	PROTEIN FAM135A
4374	PORTHOMCL4374[AjBfCgDrGgLvMmOjOlPsSpXl|(15 genes, 12 taxa)]:	0.26967	0.537758	-0.562363	-0.666324	-0.699461	-0.843824	0	-0.537191	-0.399029	-0.753519	-0.746324	-0.632957	SUMF2	SUMF2	SUMF2	SUMF2.L;SUMF2	SUMF2	SUMF2			SUMF2_MOUSE;SUMF2	PUTATIVE SULFATASE-MODIFYING FACTOR 2-LIKE	SUMF2_BOVIN;SUMF2	SULFATASE-MODIFYING FACTOR 2;SULFATASE MODIFYING FACTOR 2
2046	PORTHOMCL2046[AjBfCiDrGgLvMmOjOlPsSpXl|(21 genes, 12 taxa)]:	-0.0563187	-0.482242	0.0120879	-0.659902	-0.0794118	0.113676	-0.909039	0.402867	-0.775382	-0.618184	-0.50527	-0.632945	TRAPPC10	TRAPPC10	TRAPPC10	TRAPPC10.S;LOC108707793;TRAPPC10	TRAPPC10	TRAPPC10	TRAFFICKING PROTEIN PARTICLE COMPLEX SUBUNIT 10-LIKE		TPC10_MOUSE	PUTATIVE TRAFFICKING PROTEIN PARTICLE COMPLEX SUBUNIT 10;HYPOTHETICAL PROTEIN;TRAPPC10	TPC10_MOUSE;TPC10_HUMAN	TRAFFICKING PROTEIN PARTICLE COMPLEX SUBUNIT 10
3669	PORTHOMCL3669[AjBfCgDrGgLvMmOjOlPsSpXl|(16 genes, 12 taxa)]:	-0.658462	-0.856396	-0.622198	-0.110539	-0.0982353	0.531794	0	0.549798	-0.418794	-0.72805	-0.751716	-0.632853	BARD1	BARD1	BARD1	BARD1.L;BARD1	BARD1	BARD1			BARD1_HUMAN	PUTATIVE BRCA1-ASSOCIATED RING DOMAIN PROTEIN 1;PUTATIVE BRCA1-ASSOCIATED RING DOMAIN PROTEIN 1-LIKE	BARD1_RAT;BARD1_HUMAN	BRCA1-ASSOCIATED RING DOMAIN PROTEIN 1;ANKYRIN REPEAT DOMAIN-CONTAINING PROTEIN 42-LIKE
948	PORTHOMCL948[AjBfCgCiDrGgLvMmOjOlPsSpXl|(30 genes, 13 taxa)]:	0.279121	-0.545714	-0.342692	-0.49576	0.282868	0.0923235	-0.826182	-0.130699	-0.554559	-0.683983	-0.659926	-0.632823	TRPM2	NUDT9	NUDT9	NUDT9.L;NUDT9	NUDT9	NUDT9	TRANSIENT RECEPTOR POTENTIAL CATION CHANNEL SUBFAMILY M MEMBER 2-LIKE	NUDT9	TRPM4_MOUSE;NUDT9_MOUSE;NUDT9	PUTATIVE ADP-RIBOSE PYROPHOSPHATASE, MITOCHONDRIAL-LIKE;PUTATIVE TRANSIENT RECEPTOR POTENTIAL CATION CHANNEL SUBFAMILY M MEMBER 2 ISOFORM X7	NUDT9_MOUSE;NUDT9	ADP-RIBOSE PYROPHOSPHATASE, MITOCHONDRIAL;NUDT9
5483	PORTHOMCL5483[AjBfCgCiDrGgLvMmOjOlPsSpXl|(14 genes, 13 taxa)]:	-0.201813	-0.639868	-0.380385	-0.485417	0.0124265	-0.00170588	-0.72739	-0.776154	-0.706088	-0.482415	-0.709559	-0.632687	TMEM161B	TMEM161B	TMEM161B	LOC108707238;TMEM161B-LIKE.L;TMEM161B	TMEM161B	TMEM161B	TRANSMEMBRANE PROTEIN 161B-LIKE;TMEM161B			PUTATIVE TRANSMEMBRANE PROTEIN;TMEM161B	T161B_MOUSE	TRANSMEMBRANE PROTEIN 161B;TMEM161B
2396	PORTHOMCL2396[AjBfCgCiDrGgLvMmOjOlPsSpXl|(20 genes, 13 taxa)]:	-0.271923	-0.507077	-0.619286	0.411324	0.183015	0.437118	-0.925104	0	-0.793706	-0.607245	-0.497059	-0.63267	UBE2Q1;UBE2Q2	UBE2Q1;UBE2Q2	UBE2Q1;UBE2Q2;E330021D16RIK	UBE2Q2.S;UBE2Q2.L;UBE2Q2	UBE2Q1;UBE2Q2	UBE2Q2;UBE2Q1	UBIQUITIN-CONJUGATING ENZYME E2 Q2		UB2Q1_HUMAN	PUTATIVE UBIQUITIN-CONJUGATING ENZYME E2 Q1;UBE2Q1	UB2Q1_HUMAN	UBIQUITIN-CONJUGATING ENZYME E2 Q1;UBE2Q1
8298	PORTHOMCL8298[BfCgCiDrLvMmOjOlSpXl|(11 genes, 10 taxa)]:	0	0	0.00818681	-0.815662	-0.278725	-0.778147	-0.430078	0.606977	-0.428912	-0.786291	-0.682353	-0.632518			EMC10	EMC10.S;EMC10.L;EMC10	EMC10	EMC10	ER MEMBRANE PROTEIN COMPLEX SUBUNIT 10, TRANSCRIPT VARIANT X2; ER MEMBRANE PROTEIN COMPLEX SUBUNIT 10, TRANSCRIPT VARIANT X1;LOC100181673	EMC10	EMC10_XENLA;EMC10		EMC10_HUMAN	ER MEMBRANE PROTEIN COMPLEX SUBUNIT 10
5030	PORTHOMCL5030[AjBfCgCiDrGgLvMmOjOlPsSpXl|(15 genes, 13 taxa)]:	0.420714	-0.758154	-0.767692	0.195858	-0.175441	0.190353	-0.839052	-0.424196	-0.7035	-0.549247	-0.643627	-0.632125	MIIP	MIIP	MIIP	MIIP.L;MIIP	MIIP	MIIP	MIGRATION AND INVASION-INHIBITORY PROTEIN-LIKE		MIIP_HUMAN;MIIP	HYPOTHETICAL PROTEIN	MIIP_HUMAN	UNCHARACTERIZED LOC575588, TRANSCRIPT VARIANT X1; UNCHARACTERIZED LOC575588, TRANSCRIPT VARIANT X3; UNCHARACTERIZED LOC575588, TRANSCRIPT VARIANT X4; UNCHARACTERIZED LOC575588, TRANSCRIPT VARIANT X2
12256	PORTHOMCL12256[AjCiLvOjSp|(6 genes, 5 taxa)]:	0	0	0	0	0	0	-0.889221	0	-0.630794	-0.507926	-0.757353	-0.632024							NUCLEAR TRANSCRIPTION FACTOR Y SUBUNIT GAMMA, TRANSCRIPT VARIANT X2; NUCLEAR TRANSCRIPTION FACTOR Y SUBUNIT GAMMA, TRANSCRIPT VARIANT X3; NUCLEAR TRANSCRIPTION FACTOR Y SUBUNIT GAMMA, TRANSCRIPT VARIANT X1;NFYC		NFYC_PONAB;NFYC	PUTATIVE NUCLEAR TRANSCRIPTION FACTOR Y SUBUNIT GAMMA ISOFORM X2;NFYC	NFYC_MOUSE;NFYC	NUCLEAR TRANSCRIPTION FACTOR Y SUBUNIT GAMMA, TRANSCRIPT VARIANT X2; NUCLEAR TRANSCRIPTION FACTOR Y SUBUNIT GAMMA, TRANSCRIPT VARIANT X1;NFYC
6418	PORTHOMCL6418[AjBfCgCiDrGgLvMmOjOlPsSpXl|(13 genes, 13 taxa)]:	-0.628187	-0.943121	-0.456923	-0.270858	0.0475245	0.567618	-0.913039	0.283217	-0.318735	-0.848751	-0.728064	-0.63185	CHEK2	CHEK2	CHEK2	CHEK2.L;CHEK2	CHEK2	CHEK2	MYOSIN LIGHT CHAIN KINASE A;CHEK2	CHEK2	CHK2_MOUSE;CHEK2	PUTATIVE SERINE/THREONINE-PROTEIN KINASE CHK2 ISOFORM X2;CHEK2	CHK2_HUMAN	SERINE/THREONINE-PROTEIN KINASE CHK2, TRANSCRIPT VARIANT X2; SERINE/THREONINE-PROTEIN KINASE CHK2, TRANSCRIPT VARIANT X1;CHEK2
11126	PORTHOMCL11126[LvMmOjOlPsSpXl|(7 genes, 7 taxa)]:	0	-0.791253	-0.552637	0.293922	-0.181373	0	0	0	-0.804971	-0.697234	-0.39277	-0.631658		TNPO1	TNPO1	TNPO1.L	TNPO2 (1 OF MANY)				TNPO1_MOUSE;TNPO1		TNPO1_MOUSE	TRANSPORTIN-1
1969	PORTHOMCL1969[AjBfCgCiDrGgLvMmOjOlPsSpXl|(21 genes, 13 taxa)]:	-0.677253	-0.841231	-0.917857	0.182917	-0.773701	0.5085	-0.0692078	0.51007	-0.695824	-0.780433	-0.417402	-0.63122	CEP135;TSGA10	CEP135;TSGA10	CEP135;TSGA10	CEP135.L;TSGA10.L;CEP135;TSGA10	CEP135	CEP135;TSGA10	CENTROSOMAL PROTEIN OF 135 KDA, TRANSCRIPT VARIANT X2; CENTROSOMAL PROTEIN OF 135 KDA, TRANSCRIPT VARIANT X1;CEP135	LOC100177609	CP135_HUMAN	PUTATIVE CENTROSOMAL PROTEIN;PUTATIVE TESTIS-SPECIFIC PROTEIN 10 PROTEIN ISOFORM X4	CP135_HUMAN;CEP135	CENTROSOMAL PROTEIN OF 135 KDA, TRANSCRIPT VARIANT X3; CENTROSOMAL PROTEIN OF 135 KDA, TRANSCRIPT VARIANT X2; CENTROSOMAL PROTEIN OF 135 KDA, TRANSCRIPT VARIANT X4; CENTROSOMAL PROTEIN OF 135 KDA, TRANSCRIPT VARIANT X5; CENTROSOMAL PROTEIN OF 135 KDA, TRANSCRIPT VARIANT X1
6403	PORTHOMCL6403[AjBfCgCiDrLvMmOjOlPsSpXl|(13 genes, 12 taxa)]:	0	-0.510901	-0.418022	-0.329994	0.163186	-0.245412	-0.656799	0.204476	-0.838912	-0.61356	-0.439117	-0.63053		ZNHIT2	ZNHIT2	ZNHIT2.L	ZNHIT2	ZNHIT2	ZINC FINGER HIT DOMAIN-CONTAINING PROTEIN 2-LIKE		ZNHI2_MOUSE	PUTATIVE ZINC FINGER HIT DOMAIN-CONTAINING PROTEIN 2-LIKE ISOFORM X2;PUTATIVE ZINC FINGER HIT DOMAIN-CONTAINING PROTEIN 2-LIKE	ZNHI2_MOUSE	ZINC FINGER HIT DOMAIN-CONTAINING PROTEIN 2
3974	PORTHOMCL3974[AjBfCgCiDrGgLvMmOjOlPsSpXl|(16 genes, 13 taxa)]:	-0.369835	-0.723648	-0.796374	0.171667	0.0808578	0.0332059	-0.891909	-0.853103	-0.706353	-0.786625	-0.398407	-0.630462	EDC3	EDC3	EDC3	EDC3.L;EDC3.S;EDC3	ENHANCER OF MRNA-DECAPPING PROTEIN 3;EDC3	EDC3	ENHANCER OF MRNA-DECAPPING PROTEIN 3-LIKE	EDC3	EDC3_DANRE;EDC3_XENLA	PUTATIVE ENHANCER OF MRNA-DECAPPING PROTEIN 3 ISOFORM X3;EDC3	EDC3_MOUSE	ENHANCER OF MRNA-DECAPPING PROTEIN 3
9319	PORTHOMCL9319[AjCgDrLvOjOlSpXl|(9 genes, 8 taxa)]:	0	0	0	-0.600711	-0.261054	-0.283059	0	0	-0.470971	-0.7129	-0.707353	-0.630408				LOC108718825	SI:DKEY-12J5.1	SI:DKEY-12J5.1			ACL4_SCHPO	PUTATIVE UPF0661 TPR REPEAT-CONTAINING PROTEIN C16D10.01C ISOFORM X2	ACL4_SCHPO	UPF0661 TPR REPEAT-CONTAINING PROTEIN C16D10.01C, TRANSCRIPT VARIANT X2; UPF0661 TPR REPEAT-CONTAINING PROTEIN C16D10.01C, TRANSCRIPT VARIANT X1
5412	PORTHOMCL5412[AjBfCgCiDrGgLvMmOjOlPsSpXl|(14 genes, 13 taxa)]:	-0.445055	-0.392396	-0.407253	-0.135196	-0.138015	-0.0756765	-0.823065	0.397902	-0.508794	-0.763364	-0.6187	-0.630286	SDCCAG8	SDCCAG8	SDCCAG8	SCLT1.S	SDCCAG8	SDCCAG8	SEROLOGICALLY DEFINED COLON CANCER ANTIGEN 8 HOMOLOG		SDCG8_MOUSE	PUTATIVE SEROLOGICALLY DEFINED COLON CANCER ANTIGEN 8	SDCG8_MOUSE	SEROLOGICALLY DEFINED COLON CANCER ANTIGEN 8
5699	PORTHOMCL5699[AjBfCgDrGgLvMmOjOlPsSpXl|(14 genes, 12 taxa)]:	0.434011	-0.0407033	-0.107747	-0.333578	-0.0422794	0.805059	0	-0.635566	-0.433441	-0.910671	-0.546691	-0.630268	PDXDC1	PDXDC1	PDXDC1	PDXDC1.L;PDXDC1	PDXDC1	PDXDC1			PDXD1_XENLA	PUTATIVE PYRIDOXAL-DEPENDENT DECARBOXYLASE DOMAIN-CONTAINING PROTEIN 2 ISOFORM X7;PDXDC1	PDXD1_DANRE;PDXD1_XENLA	PUTATIVE PYRIDOXAL-DEPENDENT DECARBOXYLASE DOMAIN-CONTAINING PROTEIN 2
5733	PORTHOMCL5733[AjBfCgCiDrLvMmOjOlPsSpXl|(14 genes, 12 taxa)]:	0	-0.481055	-0.511099	-0.172304	0.0345343	0.516794	-0.740558	0.363846	-0.852765	-0.380619	-0.653431	-0.628938		TRMT1	TRMT1	LOC108703489;TRMT1.L;TRMT1	TRMT1	TRMT1	TRNA (GUANINE(26)-N(2))-DIMETHYLTRANSFERASE;TRMT1	TRMT1	TRM1_HUMAN;TRMT1	PUTATIVE TRNA (GUANINE(26)-N(2))-DIMETHYLTRANSFERASE ISOFORM X2;TRMT1	TRM1_HUMAN;TRMT1	TRNA (GUANINE(26)-N(2))-DIMETHYLTRANSFERASE, TRANSCRIPT VARIANT X1; TRNA (GUANINE(26)-N(2))-DIMETHYLTRANSFERASE, TRANSCRIPT VARIANT X2;TRMT1
1781	PORTHOMCL1781[AjCgCiDrGgLvMmOjOlPsSpXl|(22 genes, 12 taxa)]:	0.122088	-0.555385	-0.710934	-0.146446	-0.275	-0.2285	-0.881727	0	-0.862147	-0.875831	-0.148775	-0.628917	GBF1	GBF1	GBF1	GBF1.S;GBF1.L;GBF1	GBF1	GBF1	GOLGI-SPECIFIC BREFELDIN A-RESISTANCE GUANINE NUCLEOTIDE EXCHANGE FACTOR 1, TRANSCRIPT VARIANT X2; GOLGI-SPECIFIC BREFELDIN A-RESISTANCE GUANINE NUCLEOTIDE EXCHANGE FACTOR 1, TRANSCRIPT VARIANT X1;GBF1		GBF1_CRIGR	PUTATIVE GOLGI-SPECIFIC BREFELDIN A-RESISTANCE GUANINE NUCLEOTIDE EXCHANGE FACTOR 1;PUTATIVE GOLGI-SPECIFIC BREFELDIN A-RESISTANCE GUANINE NUCLEOTIDE EXCHANGE FACTOR 1 ISOFORM X2;PUTATIVE GOLGI-SPECIFIC BREFELDIN A-RESISTANCE GUANINE NUCLEOTIDE EXCHANGE FACTOR 1 ISOFORM X4	GBF1_CRIGR;GBF1	GOLGI-SPECIFIC BREFELDIN A-RESISTANCE GUANINE NUCLEOTIDE EXCHANGE FACTOR 1;GOLGI-SPECIFIC BREFELDIN A-RESISTANCE GUANINE NUCLEOTIDE EXCHANGE FACTOR 1, TRANSCRIPT VARIANT X4; GOLGI-SPECIFIC BREFELDIN A-RESISTANCE GUANINE NUCLEOTIDE EXCHANGE FACTOR 1, TRANSCRIPT VARIANT X1; GOLGI-SPECIFIC BREFELDIN A-RESISTANCE GUANINE NUCLEOTIDE EXCHANGE FACTOR 1, TRANSCRIPT VARIANT X2; GOLGI-SPECIFIC BREFELDIN A-…
7160	PORTHOMCL7160[AjBfCgDrGgLvMmOjOlSpXl|(12 genes, 11 taxa)]:	0.407637	0	-0.379341	-0.468646	0.221887	0.369735	0	0.43979	-0.739529	-0.429504	-0.717525	-0.628853	SERGEF		SERGEF	SERGEF.L;SERGEF	SERGEF	SERGEF		SERGEF	SRGEF_MOUSE;SERGEF	PUTATIVE SECRETION-REGULATING GUANINE NUCLEOTIDE EXCHANGE FACTOR;SERGEF	NHX7_ARATH	SECRETION-REGULATING GUANINE NUCLEOTIDE EXCHANGE FACTOR;SERGEF
4227	PORTHOMCL4227[AjBfCiDrGgLvMmOjOlPsSpXl|(16 genes, 12 taxa)]:	0.0614286	-0.695121	-0.704396	0.412696	-0.737525	0.603265	-0.906442	0.564965	-0.556912	-0.771084	-0.558088	-0.628695	NFYB	NFYB	NFYB	NFYB.S;NFYB.L;NFYB	NFYBB;NFYB	NFYBB;NFYBA;NFYB	NUCLEAR TRANSCRIPTION FACTOR Y SUBUNIT BETA-LIKE;TRANSCRIPTION FACTOR PROTEIN; TRANSCRIPTION FACTOR PROTEIN, TRANSCRIPT VARIANT X1;NFYB		NFYB_PETMA;NFYB	CCAAT-BINDING TRANSCRIPTION FACTOR SUBUNIT A;NFYB	NFYB_PETMA	CCAAT-BINDING TRANSCRIPTION FACTOR SUBUNIT A;NFYB
4531	PORTHOMCL4531[AjBfCgCiDrGgLvMmOjOlPsSpXl|(15 genes, 13 taxa)]:	-0.327143	-0.823033	-0.831813	0.208015	0.164412	-0.084	-0.478701	0.421469	-0.844353	-0.675645	-0.365441	-0.62848	ARL6	ARL6	ARL6	ARL6.L;ARL6	ADP-RIBOSYLATION FACTOR-LIKE PROTEIN 6;ARL6	ARL6	ADP-RIBOSYLATION FACTOR-LIKE PROTEIN 6;ARL6	ARL6	ARL6_MOUSE	ADP-RIBOSYLATION FACTOR-LIKE PROTEIN 6;ARL6	ARL6_MOUSE;ARL6	ADP-RIBOSYLATION FACTOR-LIKE PROTEIN 6;ARL6
6336	PORTHOMCL6336[AjBfCgCiDrGgLvMmOjOlSpXl|(13 genes, 12 taxa)]:	-0.401703	0	-0.545879	-0.334142	-0.593431	-0.312118	-0.60839	0.685524	-0.800176	-0.623901	-0.461275	-0.628451	RRP12		RRP12	RRP12.S;RRP12	RRP12	RRP12	RRP12-LIKE PROTEIN;RRP12	RRP12	RRP12_CHICK;RRP12	PUTATIVE RRP12-LIKE PROTEIN ISOFORM X2	RRP12_CHICK;RRP12	RRP12-LIKE PROTEIN, TRANSCRIPT VARIANT X1; RRP12-LIKE PROTEIN, TRANSCRIPT VARIANT X2; RRP12-LIKE PROTEIN, TRANSCRIPT VARIANT X3;RRP12
2934	PORTHOMCL2934[AjBfCgCiDrGgLvMmOjOlPsSpXl|(18 genes, 13 taxa)]:	-0.691484	-0.614725	-0.794286	0.299583	-0.474412	0.413588	-0.461377	0.281022	-0.631324	-0.657276	-0.595956	-0.628185	PUF60	PUF60	PUF60	LOC108719497;PUF60	POLY(U)-BINDING-SPLICING FACTOR PUF60-LIKE;PUF60B;PUF60	PUF60A;PUF60B;PUF60	POLY(U)-BINDING-SPLICING FACTOR PUF60-LIKE, TRANSCRIPT VARIANT X1; POLY(U)-BINDING-SPLICING FACTOR PUF60-LIKE, TRANSCRIPT VARIANT X2;PUF60	PUF60	PU60B_DANRE;PUF60_BOVIN	PUTATIVE POLY(U)-BINDING-SPLICING FACTOR PUF60 ISOFORM X3;HYPOTHETICAL PROTEIN	PUF60_RAT;PUF60	POLY(U)-BINDING-SPLICING FACTOR PUF60, TRANSCRIPT VARIANT X1; POLY(U)-BINDING-SPLICING FACTOR PUF60, TRANSCRIPT VARIANT X2; POLY(U)-BINDING-SPLICING FACTOR PUF60, TRANSCRIPT VARIANT X4; POLY(U)-BINDING-SPLICING FACTOR PUF60, TRANSCRIPT VARIANT X6; POLY(U)-BINDING-SPLICING FACTOR PUF60, TRANSCRIPT VARIANT X3; POLY(U)-BINDING-SPLICING FACTOR PUF60, TRANSCRIPT VARIANT X7; POLY(U)-BINDING-SPLICING FA…
5791	PORTHOMCL5791[AjBfCgCiDrGgLvMmOjOlPsSpXl|(14 genes, 13 taxa)]:	-0.284451	-0.376352	0.746209	0.350441	-0.534804	0.615765	-0.810013	0.076014	-0.625324	-0.703179	-0.554044	-0.627515	PEX16	PEX16	PEX16	PEX16.S;PEX16	PEX16	PEX16	PEROXISOMAL MEMBRANE PROTEIN PEX16-LIKE	PEX16	PEX16_DANRE	PUTATIVE PEROXISOMAL MEMBRANE PROTEIN PEX16	PEX16_BOVIN;PEX16	PEROXISOMAL MEMBRANE PROTEIN PEX16;PEX16
3065	PORTHOMCL3065[AjBfCiDrGgLvMmOjOlPsSpXl|(18 genes, 12 taxa)]:	-0.658846	-0.709802	-0.568462	0.410466	-0.439167	0.708324	-0.813831	0.712168	-0.621118	-0.516912	-0.744118	-0.627382	ERH	ERH	GM10131;ERH	ERH.L;ERH.S;ERH	ERH;ENHANCER OF RUDIMENTARY HOMOLOG	ERH	ENHANCER OF RUDIMENTARY HOMOLOG;ERH	ERH	ERH_AEDAE	PUTATIVE ENHANCER OF RUDIMENTARY-LIKE;ERH	ERH_MOUSE	ENHANCER OF RUDIMENTARY HOMOLOG;ENHANCER OF RUDIMENTARY HOMOLOG, TRANSCRIPT VARIANT X2; ENHANCER OF RUDIMENTARY HOMOLOG, TRANSCRIPT VARIANT X1;ERH
7276	PORTHOMCL7276[AjBfCgDrGgLvMmOjOlPsSpXl|(12 genes, 12 taxa)]:	0.533681	-0.493319	0.80627	0.0466667	0.50424	0.0999706	0	-0.585637	-0.524059	-0.749647	-0.608088	-0.627265	ZDHHC23	ZDHHC23	ZDHHC23	ZDHHC23.L;ZDHHC23	ZDHHC23B	ZDHHC23B;ZDHHC23		ZDHHC23	ZDH23_RAT	PUTATIVE PALMITOYLTRANSFERASE ZDHHC23 ISOFORM X2;ZDHHC23B		PALMITOYLTRANSFERASE ZDHHC23, TRANSCRIPT VARIANT X1; PALMITOYLTRANSFERASE ZDHHC23, TRANSCRIPT VARIANT X2
14694	PORTHOMCL14694[AjLvOjSp|(4 genes, 4 taxa)]:	0	0	0	0	0	0	0	0	-0.747559	-0.763963	-0.36973	-0.627084									DAG1_PIG	PUTATIVE CELL WALL PROTEIN DAN4 ISOFORM X3	DAG1_RABIT	MUCIN-3A, TRANSCRIPT VARIANT X1; MUCIN-3A, TRANSCRIPT VARIANT X3; MUCIN-3A, TRANSCRIPT VARIANT X4; MUCIN-3A, TRANSCRIPT VARIANT X2
4716	PORTHOMCL4716[AjBfCgCiDrGgLvMmOjOlPsSpXl|(15 genes, 13 taxa)]:	-0.31456	-0.844879	-0.892418	-0.300172	-0.579877	0.0551765	-0.713338	-0.238473	-0.826324	-0.580021	-0.474265	-0.62687	XPC	XPC	XPC	LOC108714651;XPC	XPC	XPC	DNA REPAIR PROTEIN COMPLEMENTING XP-C CELLS-LIKE	XPC	XPC_HUMAN	PUTATIVE DNA REPAIR PROTEIN	XPC_HUMAN;XPC_DROME	DNA REPAIR PROTEIN COMPLEMENTING XP-C CELLS HOMOLOG
14776	PORTHOMCL14776[AjLvOjSp|(4 genes, 4 taxa)]:	0	0	0	0	0	0	0	0	-0.678059	-0.744912	-0.457353	-0.626775									MSL1_DANRE	PUTATIVE MALE-SPECIFIC LETHAL 1-LIKE 1	MSL1_DANRE	MALE-SPECIFIC LETHAL 1-LIKE 1
[truncated: 1,593 more rows]
