# Supplementary material for: Derivedness Index for Estimating Degree of Phenotypic Evolution of Embryos: A Study of Comparative Transcriptomic Analyses of Chordates and Echinoderms
Source: Front Cell Dev Biol. 2021 Nov 26;9:749963. doi: 10.3389/fcell.2021.749963 (PMC8661034; doi:10.3389/fcell.2021.749963)
Supplement: Supplementary file 4 [file Table1.XLSX]

## Sheet: Sheet1
ortholog-group ID		Correlation in each species											Mean correlation	Annotation in vertebrates						Annotation in chordates		Annotation in echinoderms
ortho_id	ortho_id_full	Gg	Ps	Mm	Xl	Ol	Dr	Ci	Bf	Oj	Lv	Sp	vertebrates_mean	chicken(Gg)	turtle(Ps)	mouse(Mm)	frog(Xl)	medaka(Ol)	zebrafish(Dr)	tunicate(Ci)	amphioxus(Bf)	feather star(Oj)	sea cucumber (Aj)	green sea urchin (Lv)	purple sea urchin (Sp)
10578	PORTHOMCL10578[DrGgMmOlPsXl|(8 genes, 6 taxa)]:	-0.772033	-0.900264	-0.681538	-0.60627	-0.876749	-0.951486	0	0	0	0	0	-0.798057	FIGNL2	FIGN;FIGNL2	FIGN;FIGNL2	LOC108708614	FIGNL2	SI:DKEY-157G16.6;FIGNL2
3598	PORTHOMCL3598[BfCgDrGgLvMmOjOlPsSpXl|(17 genes, 11 taxa)]:	-0.613516	-0.95811	-0.906538	-0.368742	-0.916899	-0.919858	0	-0.370699	0.357574	-0.0731211	-0.561847	-0.780611	RFX4	RFX4	RFX4	RFX4.L;LOC108712585;RFX4	RFX4	RFX4			RFX4_MOUSE;RFX4_HUMAN		RFX4_HUMAN;RFX4_DANRE	TRANSCRIPTION FACTOR RFX4-LIKE;TRANSCRIPTION FACTOR RFX4-LIKE, TRANSCRIPT VARIANT X1;DNA-BINDING PROTEIN RFX6, TRANSCRIPT VARIANT X1; DNA-BINDING PROTEIN RFX6, TRANSCRIPT VARIANT X2
12574	PORTHOMCL12574[DrGgMmOlPsXl|(6 genes, 6 taxa)]:	-0.727198	-0.882242	-0.767143	-0.605892	-0.758601	-0.923357	0	0	0	0	0	-0.777405	HOXB9	HOXB9	HOXB9	LOC108700809;HOXB9	HOXB9A	HOXB9A
2615	PORTHOMCL2615[AjBfCgCiDrGgLvMmOjOlPsSpXl|(19 genes, 13 taxa)]:	-0.647857	-0.923385	-0.573571	-0.614532	-0.882051	-0.969666	0.554247	0.139727	-0.6295	-0.597853	0.136765	-0.768511	PTCH1;PTCH2	PTCH1	PTCH1	PTCH1.L;PTCH2.S	PTCH1;PTCH2	PTCH1;PTCH2	PROTEIN PATCHED HOMOLOG 1, TRANSCRIPT VARIANT X2; PROTEIN PATCHED HOMOLOG 1, TRANSCRIPT VARIANT X1	PTCH1	PTC1_MOUSE;PTCH1	HYPOTHETICAL PROTEIN	PTC1_DANRE;PTCH1	PROTEIN PATCHED HOMOLOG 1, TRANSCRIPT VARIANT X2; PROTEIN PATCHED HOMOLOG 1, TRANSCRIPT VARIANT X1;PTCH1
4273	PORTHOMCL4273[BfCgCiDrGgLvMmOjOlPsSpXl|(16 genes, 12 taxa)]:	-0.378792	-0.839824	-0.950922	-0.650037	-0.844948	-0.923868	0.701625	0.0158741	0.567127	0.572545	0.509544	-0.764732	DBX1	DBX1	DBX1	DBX1.S;DBX1.L;DBX1	DBX1;DEVELOPING BRAIN HOMEOBOX 1B	DBX1B;DBX1A;DBX1	HOMEOBOX PROTEIN HOX-C12A	DBX1	DBX1_XENLA;DBX1		DBX1A_DANRE;DBX1B_DANRE	HOMEOBOX PROTEIN DBX1-LIKE
7744	PORTHOMCL7744[DrGgMmOjOlPsXl|(12 genes, 7 taxa)]:	-0.760769	-0.848835	-0.765495	-0.435298	-0.797467	-0.942403	0	0	0.614239	0	0	-0.758378	HOXD4	HOXD4	HOXD4;GM28230;OBOX8	LOC108703007;HOXD4.L;HOXD4	HOXD4A;HOXD4B;HOMEOBOX PROTEIN HOX-A5	HOXD4A
10645	PORTHOMCL10645[DrGgMmOlPsXl|(8 genes, 6 taxa)]:	-0.851484	-0.804264	-0.721209	-0.445533	-0.668854	-0.968675	0	0	0	0	0	-0.743336	HOXB8	HOXB8	HOXB8	LOC108700806;LOC108702520;HOXB8	HOXB8A	HOXB8A;HOXB8B
12949	PORTHOMCL12949[DrGgMmOlPsXl|(6 genes, 6 taxa)]:	-0.659066	-0.786022	-0.904176	-0.49594	-0.645703	-0.954763	0	0	0	0	0	-0.740945	HOXB3	HOXB3	HOXB3	HOXB3.S	HOXB3A;HOXB3	HOXB3A;HOXB3
3096	PORTHOMCL3096[BfCgCiDrGgLvMmOjOlPsSpXl|(18 genes, 12 taxa)]:	-0.730659	-0.881714	-0.858187	-0.487738	-0.627353	-0.859029	-0.407857	0.289244	-0.221118	-0.783096	-0.494363	-0.74078	TBCD	TBCD	TBCD	TBCD.L;LOC108702845;TBCD	TBCD	TBCD	TUBULIN-SPECIFIC CHAPERONE D-LIKE, TRANSCRIPT VARIANT X2; TUBULIN-SPECIFIC CHAPERONE D-LIKE, TRANSCRIPT VARIANT X1;TBCD		TBCD_MOUSE;TBCD		TBCD_CHICK;TBCD_HUMAN;TBCD	TUBULIN-SPECIFIC CHAPERONE D;TBCD
5645	PORTHOMCL5645[AjBfCgCiDrGgLvMmOjOlPsSpXl|(14 genes, 13 taxa)]:	-0.681044	-0.865143	-0.549286	-0.855025	-0.579681	-0.895647	-0.630779	-0.37014	-0.847412	-0.491785	-0.51348	-0.737638	C14ORF166;RTRAF	C14ORF166;RTRAF	2700060E02RIK;RTRAF	C14ORF166.S;C14ORF166.L;RTRAF	RTRAF	ZGC:56576;RTRAF	UPF0568 PROTEIN C14ORF166 HOMOLOG;RTRAF	RTRAF	CN166_DANRE	HYPOTHETICAL PROTEIN;RTRAF	CN166_PONAB	UPF0568 PROTEIN C14ORF166 HOMOLOG
5647	PORTHOMCL5647[AjBfCgCiDrGgLvMmOlPsSpXl|(14 genes, 12 taxa)]:	-0.437527	-0.858374	-0.819615	-0.694877	-0.710809	-0.895441	-0.598169	-0.762196	0	-0.104665	-0.562868	-0.736107	TUBGCP4	TUBGCP4	TUBGCP4	LOC108712877;TUBGCP4.L;TUBGCP4	TUBGCP4	TUBGCP4	GAMMA-TUBULIN COMPLEX COMPONENT 4-LIKE;TUBGCP4	TUBGCP4		PUTATIVE GAMMA-TUBULIN COMPLEX COMPONENT 4-LIKE;PUTATIVE GAMMA-TUBULIN COMPLEX COMPONENT 4 ISOFORM X2;TUBGCP4	GCP4_HUMAN;TUBGCP4	GAMMA-TUBULIN COMPLEX COMPONENT 4, TRANSCRIPT VARIANT X1; GAMMA-TUBULIN COMPLEX COMPONENT 4, TRANSCRIPT VARIANT X2;TUBGCP4
4349	PORTHOMCL4349[AjBfCgCiDrGgLvMmOjOlPsSpXl|(15 genes, 13 taxa)]:	-0.572857	-0.929582	-0.507692	-0.925107	-0.569804	-0.910471	-0.816299	-0.783077	0.202059	-0.0313313	-0.661765	-0.735919	EIF2D	EIF2D	EIF2D	EIF2D.S;EIF2D	EIF2D	EIF2D	EUKARYOTIC TRANSLATION INITIATION FACTOR 2D-LIKE	EIF2D	EIF2D_RABIT;EIF2D	PUTATIVE EUKARYOTIC TRANSLATION INITIATION FACTOR 2D-LIKE;LIGATIN;EIF2D	EIF2D_RABIT;EIF2D	EUKARYOTIC TRANSLATION INITIATION FACTOR 2D;EIF2D
9083	PORTHOMCL9083[DrGgMmOlPsXl|(10 genes, 6 taxa)]:	-0.613352	-0.493626	-0.638352	-0.814343	-0.909902	-0.935381	0	0	0	0	0	-0.734159	ILDR2	ILDR2	ILDR2	ILDR2.L;LOC108707390;LOC108709272;ILDR2	ILDR2;IMMUNOGLOBULIN-LIKE DOMAIN-CONTAINING RECEPTOR 2	ILDR2;SI:ZFOS-1011F11.2
5339	PORTHOMCL5339[AjBfCgCiDrGgLvMmOlPsSpXl|(14 genes, 12 taxa)]:	-0.468736	-0.812527	-0.553297	-0.911667	-0.802034	-0.846147	0.275039	-0.643217	0	-0.258865	0.00637255	-0.732401	PSMA1	PSMA1	PSMA1	PSMA1.L;LOC446975;PSMA1	PSMA1	PSMA1	PROTEASOME SUBUNIT ALPHA TYPE-1-LIKE;PSMA1	PSMA1		PUTATIVE PROTEASOME SUBUNIT ALPHA TYPE-1-LIKE;PSMA1	PSA1_MOUSE	PROTEASOME SUBUNIT ALPHA TYPE-1;PROTEASOME SUBUNIT ALPHA TYPE-1-LIKE;PSMA1
5944	PORTHOMCL5944[AjBfCgCiDrGgLvMmOjOlPsSpXl|(14 genes, 13 taxa)]:	-0.70467	-0.716703	-0.836276	-0.355686	-0.894369	-0.883621	0.789531	-0.440567	0.654138	0.683496	0.469205	-0.731888	NKX6-2	NKX6-2	NKX6-2	NKX6-2.S;NKX6-2.L;NKX6-2	NKX6.2;NKX6-2	NKX6.2;NKX6-2	HOMEOBOX PROTEIN DTH-2	NKX6-3	NKX62_HUMAN	PUTATIVE HOMEOBOX PROTEIN NKX-6.2-LIKE	NKX61_MESAU	HOMEOBOX PROTEIN NKX-6.2;NKX6-1
9731	PORTHOMCL9731[DrGgMmOlPsXl|(9 genes, 6 taxa)]:	-0.664011	-0.833978	-0.44967	-0.651941	-0.856949	-0.922371	0	0	0	0	0	-0.72982	RASL11A	RASL11A	RASL11A	LOC108698376;LOC108708709	RASL11A	RASL11A
8246	PORTHOMCL8246[BfCiDrGgLvMmOlPsXl|(11 genes, 9 taxa)]:	-0.667363	-0.90022	-0.60022	-0.588535	-0.662811	-0.958382	0.352737	-0.0127972	0	0.783816	0	-0.729588	LRRN1	LRRN1	LINGO3;LRRN1	LRRN1.S	LEUCINE RICH REPEAT NEURONAL 1;LRRN1	LRRN1	LEUCINE-RICH REPEAT NEURONAL PROTEIN 1-LIKE				LIGO2_HUMAN
2266	PORTHOMCL2266[AjBfCgCiDrGgLvMmOjOlPsSpXl|(20 genes, 13 taxa)]:	-0.453462	-0.677055	-0.550879	-0.906887	-0.880466	-0.904471	0.701896	-0.57035	-0.262441	-0.332508	-0.393873	-0.72887	CCT2	CCT2	CCT2	CCT2.L;CCT2.S;CCT2	CCT2	CABZ01075268.2;CCT2	T-COMPLEX PROTEIN 1 SUBUNIT BETA-LIKE;CCT2	CCT2	TCPB_BOVIN	PUTATIVE T-COMPLEX PROTEIN 1 SUBUNIT BETA-LIKE ISOFORM X2;T-COMPLEX PROTEIN 1 SUBUNIT BETA	TCPB_MACFA;CCT2	T-COMPLEX PROTEIN 1 SUBUNIT BETA
4235	PORTHOMCL4235[AjBfCgCiDrGgLvMmOjOlPsSpXl|(16 genes, 13 taxa)]:	-0.328571	-0.906813	-0.747473	-0.840931	-0.595833	-0.944281	-0.773377	-0.61839	-0.103206	0.130114	-0.677574	-0.727317	GUF1	GUF1	GUF1	GUF1.L;GUF1	GUF1	GUF1	TRANSLATION FACTOR GUF1, MITOCHONDRIAL-LIKE;GUF1	GUF1	GUF1_BOVIN;GUF1_MOUSE;GUF1	PUTATIVE TRANSLATION FACTOR GUF1, MITOCHONDRIAL	GUF1_HUMAN;LEPA_RHOP5	TRANSLATION FACTOR GUF1, MITOCHONDRIAL;GUF1
11566	PORTHOMCL11566[DrGgMmOlPsXl|(7 genes, 6 taxa)]:	-0.748846	-0.73578	-0.66011	-0.831587	-0.556357	-0.824882	0	0	0	0	0	-0.72626	CXXC5	CXXC5	CXXC5	CXXC4.S;CXXC4	CXXC5A;CXXC5	CXXC5B;CXXC5A;CXXC5
2873	PORTHOMCL2873[AjBfCgCiDrGgLvMmOjOlPsSpXl|(18 genes, 13 taxa)]:	-0.514945	-0.834286	-0.557857	-0.92777	-0.705882	-0.805824	0.744584	-0.552813	0.302324	0.204768	-0.154412	-0.724427	PSMA7	PSMA7;PSMA8	PSMA8;PSMA7	PSMA7.L;PSMA7.S;PSMA7	PSMA8	PSMA8	PROTEASOME SUBUNIT ALPHA TYPE-7	PSMA7	PSA7_CARAU;PSMA7	PUTATIVE PROTEASOME SUBUNIT ALPHA TYPE-7-LIKE ISOFORM X3	PSA7L_MOUSE;PSMA8	PROTEASOME SUBUNIT ALPHA TYPE-7;PROTEASOME SUBUNIT ALPHA TYPE-7-LIKE;PSMA8
10682	PORTHOMCL10682[DrGgMmOlPsXl|(8 genes, 6 taxa)]:	-0.558681	-0.627341	-0.810549	-0.606103	-0.825319	-0.917526	0	0	0	0	0	-0.724253	MDK	MDK	MDK	MDK.S;MDK.L;MDK	MDKB	MDKA;MDKB;MDK
2309	PORTHOMCL2309[AjBfCgCiDrGgLvMmOjOlPsSpXl|(20 genes, 13 taxa)]:	-0.47522	-0.774022	-0.551264	-0.856176	-0.827083	-0.827912	-0.80274	0.321888	-0.191941	0.0635707	-0.503186	-0.718613	AMD1	AMD1	AMD1;AMD2	AMD1.S;AMD1.L;AMD1	AMD1	AMD1	S-ADENOSYLMETHIONINE DECARBOXYLASE PROENZYME;AMD1		DCAM_XENLA;DCAM_DROME	PUTATIVE S-ADENOSYLMETHIONINE DECARBOXYLASE PROENZYME-LIKE;S-ADENOSYLMETHIONINE DECARBOXYLASE PROENZYME;AMD1	DCAM_DROME	S-ADENOSYLMETHIONINE DECARBOXYLASE PROENZYME-LIKE
12890	PORTHOMCL12890[DrGgMmOlPsXl|(6 genes, 6 taxa)]:	-0.617857	-0.656791	-0.794121	-0.789608	-0.666691	-0.777749	0	0	0	0	0	-0.717136	QSER1	QSER1	QSER1	QSER1.S;QSER1	QSER1	QSER1
1937	PORTHOMCL1937[AjBfCgCiDrGgLvMmOjOlPsSpXl|(22 genes, 13 taxa)]:	-0.70456	-0.839604	-0.692308	-0.849375	-0.53848	-0.677735	-0.614026	-0.118182	-0.814235	-0.680619	-0.749265	-0.717011	KNTC1		KNTC1	KNTC1.L;KNTC1	KNTC1	KNTC1	KINETOCHORE-ASSOCIATED PROTEIN 1-LIKE		KNTC1_HUMAN;KNTC1_MOUSE	PUTATIVE KINETOCHORE-ASSOCIATED PROTEIN 1	KNTC1_MOUSE;KNTC1_HUMAN	KINETOCHORE-ASSOCIATED PROTEIN 1
6026	PORTHOMCL6026[BfCgDrGgMmOlPsXl|(14 genes, 8 taxa)]:	-0.887033	-0.766505	-0.792967	-0.370562	-0.564676	-0.900429	0	0.664615	0	0	0	-0.713695	HOXC4;HOXB4	HOXC4;HOXB4	HOXC4;HOXB4	LOC108709892	HOXC4;HOXA4A	HOXB4A;HOXC4A
3221	PORTHOMCL3221[AjBfCgCiDrGgLvMmOjOlPsSpXl|(17 genes, 13 taxa)]:	-0.609725	-0.793846	-0.53489	-0.9425	-0.899093	-0.494794	-0.0620519	0.00972	-0.0940294	-0.558927	0.139093	-0.712475	CCT8	CCT8;CCT8L2	CCT8;CCT8L1;CCT8L2	CCT8.S;CCT8.L;CCT8	CCT8	CCT8	T-COMPLEX PROTEIN 1 SUBUNIT THETA-LIKE;CCT8	CCT8	TCPQ_CHICK;CCT8	PUTATIVE T-COMPLEX PROTEIN 1 SUBUNIT THETA	TCPQ_CHICK;CCT8	T-COMPLEX PROTEIN 1 SUBUNIT THETA;CCT8
3965	PORTHOMCL3965[AjBfCgCiDrGgLvMmOjOlPsSpXl|(16 genes, 13 taxa)]:	-0.766319	-0.876308	-0.552033	-0.765319	-0.548873	-0.752706	0.454532	-0.206434	-0.240265	0.282663	-0.057598	-0.710259	TCP1	TCP1	TCP1	TCP1.S;TCP1.L;TCP1	TCP1	TCP1	T-COMPLEX PROTEIN 1 SUBUNIT ALPHA-LIKE;TCP1	TCP1	TCPA_HUMAN	PUTATIVE T-COMPLEX PROTEIN 1 SUBUNIT ALPHA-LIKE;CHAPERONIN	TCPA_PALPA;TCP1	T-COMPLEX PROTEIN 1 SUBUNIT ALPHA;TCP1
6688	PORTHOMCL6688[AjBfCgDrGgMmOlPsSpXl|(13 genes, 10 taxa)]:	-0.533297	-0.687253	-0.848407	-0.701246	-0.53258	-0.953842	0	-0.640562	0	0	0.504753	-0.709437	HOXA3	HOXA3	HOXA3	HOXA3.S;HOXB3.L;HOXA3.L;HOXB3;HOXA3	HOXA3A	HOXA3A				PUTATIVE HOMEOBOX PROTEIN HOX-A3		PANCREAS/DUODENUM HOMEOBOX PROTEIN 1-LIKE
9670	PORTHOMCL9670[CiDrGgMmOlPsSpXl|(9 genes, 8 taxa)]:	-0.767527	-0.878769	-0.595549	-0.766259	-0.650605	-0.582441	0.0991948	0	0	0	-0.277696	-0.706859	MYCN	MYCN	MYCN;MYCS	MYCN.L	MYCN	MYCN	TRANSCRIPTION FACTOR PROTEIN, TRANSCRIPT VARIANT X1; TRANSCRIPTION FACTOR PROTEIN					MYC PROTEIN
6472	PORTHOMCL6472[AjBfCgCiDrGgLvMmOlPsSpXl|(13 genes, 12 taxa)]:	-0.468022	-0.828352	-0.538681	-0.724828	-0.751716	-0.901059	0.265351	-0.317061	0	-0.778927	-0.679657	-0.70211	GARS	GARS	GARS	GARS.L	GARS	GARS	GLYCINE--TRNA LIGASE, TRANSCRIPT VARIANT X2; GLYCINE--TRNA LIGASE, TRANSCRIPT VARIANT X1;GARS	GARS		GLYCINE--TRNA LIGASE	SYG_MOUSE	GLYCINE--TRNA LIGASE;GLYCINE--TRNA LIGASE-LIKE;GARS
1389	PORTHOMCL1389[AjBfCgCiDrGgMmOjOlPsSpXl|(25 genes, 12 taxa)]:	-0.513242	-0.682154	-0.574231	-0.850539	-0.776495	-0.815794	0.757753	-0.714615	0.406765	0	0.592279	-0.702076	MYH10;MYH9	MYH10	MYH10;MYH9	MYH10.S;LOC108701185;MYH9.L	MYH9B;MYOSIN-10;MYH9;MYH10	MYH11A;MYH10	MYOSIN-10, TRANSCRIPT VARIANT X5; MYOSIN-10, TRANSCRIPT VARIANT X4; MYOSIN-10, TRANSCRIPT VARIANT X2; MYOSIN-10, TRANSCRIPT VARIANT X1; MYOSIN-10, TRANSCRIPT VARIANT X6; MYOSIN-10, TRANSCRIPT VARIANT X3		MYH10_HUMAN	PUTATIVE MYOSIN-10		MYOSIN II
1807	PORTHOMCL1807[AjBfCgCiDrGgLvMmOjOlPsSpXl|(22 genes, 13 taxa)]:	-0.447637	-0.744791	-0.535549	-0.844926	-0.720539	-0.911529	-0.195182	-0.203846	-0.420588	-0.403756	-0.448039	-0.700829	IARS	IARS	IARS	IARS.L;IARS.S;IARS	IARS	IARS	ISOLEUCINE--TRNA LIGASE, CYTOPLASMIC;ISOLEUCINE--TRNA LIGASE, CYTOPLASMIC-LIKE;IARS		SYIC_HUMAN;IARS	PUTATIVE ISOLEUCINE--TRNA LIGASE, CYTOPLASMIC ISOFORM X2;PUTATIVE ISOLEUCINE--TRNA LIGASE, CYTOPLASMIC-LIKE;PUTATIVE ISOLEUCINE--TRNA LIGASE, CYTOPLASMIC	SYIC_MOUSE;IARS	ISOLEUCINE--TRNA LIGASE, CYTOPLASMIC;IARS
4198	PORTHOMCL4198[AjBfDrGgLvMmOlPsSpXl|(16 genes, 10 taxa)]:	-0.564011	-0.905143	-0.942747	-0.341887	-0.901972	-0.523794	0	0.226175	0	-0.533478	0.399877	-0.696592	MSI1	MSI1	MSI1	MSI1.S;LOC397764;MSI1	MUSASHI RNA BINDING PROTEIN 1;MSI1	MSI1;ZGC:110796;CABZ01037298.1				HYPOTHETICAL PROTEIN	MSI1H_HUMAN	RNA-BINDING PROTEIN MUSASHI HOMOLOG 2, TRANSCRIPT VARIANT X5; RNA-BINDING PROTEIN MUSASHI HOMOLOG 2, TRANSCRIPT VARIANT X7; RNA-BINDING PROTEIN MUSASHI HOMOLOG 2, TRANSCRIPT VARIANT X1; RNA-BINDING PROTEIN MUSASHI HOMOLOG 2, TRANSCRIPT VARIANT X2; RNA-BINDING PROTEIN MUSASHI HOMOLOG 2, TRANSCRIPT VARIANT X3; RNA-BINDING PROTEIN MUSASHI HOMOLOG 2, TRANSCRIPT VARIANT X6; RNA-BINDING PROTEIN MUSASHI…
10599	PORTHOMCL10599[DrGgMmOjOlPsXl|(8 genes, 7 taxa)]:	-0.403901	-0.978505	-0.923681	-0.61723	-0.386863	-0.865176	0	0	0.736735	0	0	-0.695893	H2AFY2	H2AFY2	H2AFY2	H2AFY2.S;H2AFY2.L;H2AFY2	H2AFY2	H2AFY2			H2A1_PSAMI
4952	PORTHOMCL4952[AjBfCgCiDrGgLvMmOjOlPsSpXl|(15 genes, 13 taxa)]:	-0.507912	-0.849978	-0.541429	-0.894314	-0.696054	-0.658118	0.264234	0.575035	-0.0475588	0.4387	-0.115319	-0.691301	PSMA4	PSMA4	PSMA4	PSMA4.L;PSMA4.S;PSMA4	PSMA4	PSMA4	PROTEASOME SUBUNIT ALPHA TYPE-4-LIKE	PSMA4	PSA4_MOUSE;PSMA4	PUTATIVE PROTEASOME SUBUNIT ALPHA TYPE-4 ISOFORM X2;PSMA4	PSA4_RAT	PROTEASOME SUBUNIT ALPHA TYPE-4, TRANSCRIPT VARIANT X1; PROTEASOME SUBUNIT ALPHA TYPE-4, TRANSCRIPT VARIANT X2;PSMA4
10594	PORTHOMCL10594[DrGgMmOlPsXl|(8 genes, 6 taxa)]:	-0.72478	-0.932615	-0.895824	-0.477849	-0.632721	-0.480147	0	0	0	0	0	-0.690656	DACH2	DACH2	DACH2	DACH2.L;LOC108700148;DACH2	DACHB;DACH2	DACHA;DACHB;DACH2
9840	PORTHOMCL9840[DrGgMmOlPsXl|(9 genes, 6 taxa)]:	-0.440815	-0.818879	-0.815769	-0.721023	-0.393073	-0.945417	0	0	0	0	0	-0.689163	SOX1	SOX1	SOX1	SOX1.L;SOX1.S;SOX1	SOX1;TRANSCRIPTION FACTOR SOX-1A-LIKE	SOX1A;SOX1B
740	PORTHOMCL740[AjBfCgDrGgLvMmOjOlPsSpXl|(34 genes, 12 taxa)]:	-0.856593	-0.649978	-0.673462	-0.551304	-0.914534	-0.485971	0	-0.844438	0.530912	0.0679463	-0.137377	-0.68864	PRTG;IGDCC3	IGDCC4;PRTG	IGDCC3;PRTG	PRTG.L;IGDCC4.L;PRTG.S;LOC108712808;PRTG;IGDCC4	PRTG;PRTGB;SI:CH211-57N23.4	IGDCC3;SI:CH211-57N23.4;CABZ01080518.1;IGDCC4;PRTGB;PRTGA;PRTG			PRTGA_DANRE;PRTG_HUMAN;L1CA1_DANRE;NEO1_RAT	IMMUNOGLOBULIN SUPERFAMILY DCC SUBCLASS MEMBER 4;PUTATIVE PROTOGENIN;PROTOGENIN;HYPOTHETICAL PROTEIN	PRTG_HUMAN	PROTOGENIN B;FIBRONECTIN TYPE III DOMAIN-CONTAINING PROTEIN-LIKE
11755	PORTHOMCL11755[DrGgMmOlPsXl|(7 genes, 6 taxa)]:	-0.63978	-0.792703	-0.711813	-0.593358	-0.725245	-0.666147	0	0	0	0	0	-0.688174	MLLT3	MLLT3	MLLT3	MLLT3.L;MLLT3.S;MLLT3	MLLT3	MLLT3
3245	PORTHOMCL3245[AjBfCgCiDrGgLvMmOjOlPsSpXl|(17 genes, 13 taxa)]:	-0.636484	-0.848703	-0.640495	-0.838505	-0.628456	-0.529853	-0.78961	-0.856432	-0.681676	-0.778019	-0.593137	-0.687083	ZW10	ZW10	ZW10	ZW10.S;ZW10.L;ZW10	ZW10	ZW10	CENTROMERE/KINETOCHORE PROTEIN ZW10 HOMOLOG	ZW10	ZW10_HUMAN;ZW10	HYPOTHETICAL PROTEIN;PUTATIVE CENTROMERE/KINETOCHORE PROTEIN ZW10-LIKE	ZW10_PONAB;ZW10_HUMAN	CENTROMERE/KINETOCHORE PROTEIN ZW10 HOMOLOG;ZW10
6906	PORTHOMCL6906[AjBfCgCiDrGgLvMmOjOlPsSpXl|(13 genes, 13 taxa)]:	-0.519945	-0.637451	-0.567802	-0.756912	-0.825588	-0.810294	-0.580519	0.471608	-0.0791765	0.175728	0.172181	-0.686332	MRPS11	MRPS11	MRPS11	MRPS11.L	MRPS11	MRPS11	28S RIBOSOMAL PROTEIN S11, MITOCHONDRIAL-LIKE		RT11_MOUSE;MRPS11	HYPOTHETICAL PROTEIN	RT11_BOVIN	28S RIBOSOMAL PROTEIN S11, MITOCHONDRIAL;MRPS11
847	PORTHOMCL847[AjBfCgCiDrGgLvMmOjOlPsSpXl|(32 genes, 13 taxa)]:	-0.249011	-0.80233	-0.926868	-0.591159	-0.659363	-0.884324	0.591965	-0.586713	0.531235	0.81072	0.773633	-0.685509	MEIS2A.1;MEIS1;MEIS2	MEIS2;MEIS1;MEIS3	MEIS1;MEIS2;MEIS3	MEIS3.L;LOC108699226;MEIS3.S;MEIS1.L;MEIS1.S;MEIS2.S;MEIS3;MEIS2;MEIS1	MEIS1B;MEIS HOMEOBOX 2;MEIS2A;MEIS3;MEIS1;MEIS2	MEIS1B;MEIS2A;MEIS2B;MEIS1A;MEIS3;MEIS1;MEIS2	TRANSCRIPTION FACTOR PROTEIN, TRANSCRIPT VARIANT X3; TRANSCRIPTION FACTOR PROTEIN; TRANSCRIPTION FACTOR PROTEIN, TRANSCRIPT VARIANT X2; TRANSCRIPTION FACTOR PROTEIN, TRANSCRIPT VARIANT X1		MEIS1_MOUSE	PUTATIVE HOMEOBOX PROTEIN MEIS1 ISOFORM X2	MEIS1_XENLA;MEIS1	HOMEOBOX PROTEIN MEIS1, TRANSCRIPT VARIANT X2; HOMEOBOX PROTEIN MEIS1, TRANSCRIPT VARIANT X1
10515	PORTHOMCL10515[DrGgMmOlPsXl|(8 genes, 6 taxa)]:	-0.658516	-0.729758	-0.833571	-0.621023	-0.4682	-0.797343	0	0	0	0	0	-0.684735	HOXB5	HOXB5;HOXA5	HOXB5	HOXB5.S;HOXB5	HOXB5B;HOXB5A	HOXB5A;HOXB5B;HOXB5
5340	PORTHOMCL5340[AjBfDrGgLvMmOjOlPsSpXl|(14 genes, 11 taxa)]:	-0.233033	-0.705172	-0.863169	-0.532748	-0.861886	-0.904116	0	-0.480384	0.735351	0.762957	0.388762	-0.683354	EN2	EN2	EN2	EN2.L	EN2	ENG2A;ENG2B		EN	HME2B_XENLA	HOMEOBOX PROTEIN ENGRAILED;ENGRAILED;PUTATIVE ARGININE-FIFTY HOMEOBOX-LIKE	HMEN_TRIGR	HOMEOBOX PROTEIN ENGRAILED-LIKE
645	PORTHOMCL645[AjBfCgDrGgLvMmOjOlPsSpXl|(36 genes, 12 taxa)]:	-0.0114919	-0.684907	-0.964536	-0.751805	-0.869907	-0.799234	0	-0.780658	-0.769294	-0.690978	-0.128676	-0.680314	ADGRV1	GPR98	ADGRV1	LOC108695679;ADGRV1	ADGRV1	ADGRV1;FREM2B;FREM2			GPR98_HUMAN;GPR98_DANRE	PUTATIVE G-PROTEIN COUPLED RECEPTOR;PUTATIVE G PROTEIN COUPLED RECEPTOR 98-LIKE PROTEIN ISOFORM X1;HYPOTHETICAL PROTEIN;PUTATIVE SODIUM/CALCIUM EXCHANGER	GPR98_DANRE;GPR98_HUMAN;GPR98_MOUSE	G-PROTEIN COUPLED RECEPTOR 98;G-PROTEIN COUPLED RECEPTOR 98-LIKE
10414	PORTHOMCL10414[DrGgMmOjOlPsXl|(8 genes, 7 taxa)]:	-0.746209	-0.716396	-0.679231	-0.388243	-0.703533	-0.84602	0	0	0.71295	0	0	-0.679939	NKX2-5	NKX2-5	NKX2-5	NKX2-5.S;NKX2-5.L;NKX2-5	NKX2-5	NKX2.5;NKX2-5			NKX26_HUMAN;NKX2-5
2232	PORTHOMCL2232[AjBfCgCiDrGgLvMmOlPsSpXl|(20 genes, 12 taxa)]:	-0.737857	-0.850901	-0.772692	-0.386691	-0.840931	-0.486176	-0.769169	-0.367097	0	-0.194613	-0.507475	-0.679208	DICER1	DICER1	DICER1	DICER1.L;DICER1.S;DICER1	DICER1	DICER1	ENDORIBONUCLEASE DICER			DICER;PUTATIVE ENDORIBONUCLEASE DICER-LIKE;PUTATIVE ENDORIBONUCLEASE DICER ISOFORM X1	DICER_DANRE;DICER_CRIGR	ENDORIBONUCLEASE DICER, TRANSCRIPT VARIANT X1; ENDORIBONUCLEASE DICER, TRANSCRIPT VARIANT X2
4190	PORTHOMCL4190[AjBfCgCiDrGgLvMmOjOlPsSpXl|(16 genes, 13 taxa)]:	-0.372912	-0.685011	-0.55544	-0.880637	-0.92799	-0.647353	-0.626455	-0.778571	-0.315647	0.214056	0.0919118	-0.678224	CCT3	CCT3	CCT3	CCT3.L;CCT3	CCT3	CCT3	T-COMPLEX PROTEIN 1 SUBUNIT GAMMA-LIKE;CCT3	CCT3	TCPG_XENLA	PUTATIVE T-COMPLEX PROTEIN 1 SUBUNIT GAMMA	TCPG_BOVIN	T-COMPLEX PROTEIN 1 SUBUNIT GAMMA
5918	PORTHOMCL5918[AjBfCgCiDrGgLvMmOjOlPsSpXl|(14 genes, 13 taxa)]:	-0.522033	-0.853319	-0.545549	-0.461373	-0.73777	-0.946412	-0.668961	0.0767133	-0.0288235	-0.14937	-0.852083	-0.677743	MRPL47	MRPL47	MRPL47	MRPL47.L;MRPL47	MRPL47	MRPL47	39S RIBOSOMAL PROTEIN L47, MITOCHONDRIAL-LIKE	MRPL47	RM47_HUMAN;MRPL47	PUTATIVE 39S RIBOSOMAL PROTEIN L47, MITOCHONDRIAL	RM47_MOUSE	39S RIBOSOMAL PROTEIN L47, MITOCHONDRIAL;MRPL47
1971	PORTHOMCL1971[AjBfCgCiDrGgLvMmOjOlPsSpXl|(21 genes, 13 taxa)]:	-0.428352	-0.565363	-0.575989	-0.889093	-0.90701	-0.696706	0.650948	-0.44347	-0.866765	0.299876	-0.0908088	-0.677085	CCT7	CCT7	CCT7	LOC495278;CCT7.S;CCT7	CCT7	CCT7	T-COMPLEX PROTEIN 1 SUBUNIT ETA;CCT7	CCT7	TCPH_MOUSE;TCPH_BOVIN;CCT7	HYPOTHETICAL PROTEIN;PUTATIVE T-COMPLEX PROTEIN 1 SUBUNIT ETA;PUTATIVE T-COMPLEX PROTEIN 1 SUBUNIT ETA ISOFORM X1;PUTATIVE T-COMPLEX PROTEIN 1 SUBUNIT ETA ISOFORM X2;CCT7	TCPH_MOUSE;TCPD_MOUSE;CCT4	T-COMPLEX PROTEIN 1 SUBUNIT ETA, TRANSCRIPT VARIANT X2; T-COMPLEX PROTEIN 1 SUBUNIT ETA, TRANSCRIPT VARIANT X1;CCT7
4626	PORTHOMCL4626[AjBfCgCiDrGgLvMmOjOlPsSpXl|(15 genes, 13 taxa)]:	-0.51956	-0.74844	-0.529176	-0.807157	-0.885172	-0.567118	-0.810221	-0.16	0.642206	0.500743	-0.682598	-0.676104	UCHL5	UCHL5	UCHL5	UCHL5.S;UCHL5.L;UCHL5	UCHL5	UCHL5	UBIQUITIN CARBOXYL-TERMINAL HYDROLASE ISOZYME L5-LIKE;UCHL5	UCHL5	UCHL5_MOUSE	UBIQUITIN CARBOXYL-TERMINAL HYDROLASE ISOZYME L5-LIKE PROTEIN	UCHL5_HUMAN;UCHL5	UBIQUITIN CARBOXYL-TERMINAL HYDROLASE ISOZYME L5;UCHL5
3229	PORTHOMCL3229[AjBfCgDrGgLvMmOjOlPsSpXl|(17 genes, 12 taxa)]:	-0.675549	-0.801714	-0.547802	-0.351863	-0.726446	-0.942088	0	0	-0.282853	-0.00175439	-0.388848	-0.674244	PPID	PPID	PPID	PPID.L;PPID.S;PPID	PPID	PPID		PPID	PPID_MOUSE;PPID	PUTATIVE PEPTIDYL-PROLYL CIS-TRANS ISOMERASE D;PUTATIVE NK-TUMOR RECOGNITION PROTEIN;PPIG;CPR6	PPID_HUMAN	PEPTIDYL-PROLYL CIS-TRANS ISOMERASE D;PEPTIDYL-PROLYL CIS-TRANS ISOMERASE-LIKE, TRANSCRIPT VARIANT X1; PEPTIDYL-PROLYL CIS-TRANS ISOMERASE-LIKE, TRANSCRIPT VARIANT X2;CPR6
10423	PORTHOMCL10423[BfDrGgMmOlPsXl|(8 genes, 7 taxa)]:	-0.44011	-0.674888	-0.763187	-0.581269	-0.760555	-0.823883	0	-0.0947552	0	0	0	-0.673982	HOXA9	HOXA9	HOXA9	HOXA9.L	HOXA9	HOXA9A
5793	PORTHOMCL5793[AjBfCgCiDrGgLvMmOjOlPsSpXl|(14 genes, 13 taxa)]:	-0.749011	-0.88567	-0.581374	-0.496303	-0.511103	-0.795948	-0.551008	-0.566863	0.326911	0.412663	-0.366652	-0.669902	TBX20	TBX20	TBX20	TBX20.L;TBX20	TBX20	TBX20	T-BOX TRANSCRIPTION FACTOR CI-TBX20;TBX20		TBX20_DANRE;TBX20	PUTATIVE T-BOX TRANSCRIPTION FACTOR TBX20 ISOFORM X2	TBX20_MOUSE	UNCHARACTERIZED LOC100889015
6745	PORTHOMCL6745[AjBfCgCiDrGgLvMmOjOlPsSpXl|(13 genes, 13 taxa)]:	-0.438736	-0.745714	-0.52489	-0.660882	-0.785441	-0.863647	0.490455	-0.396084	0.337	0.0213829	-0.697426	-0.669885	MRPL39	MRPL39	MRPL39	MRPL39.L;MRPL39	MRPL39	MRPL39	39S RIBOSOMAL PROTEIN L39, MITOCHONDRIAL		RM39_MOUSE;MRPL39	PUTATIVE 39S RIBOSOMAL PROTEIN L39, MITOCHONDRIAL ISOFORM X2	RM39_MOUSE	39S RIBOSOMAL PROTEIN L39, MITOCHONDRIAL, TRANSCRIPT VARIANT X2; 39S RIBOSOMAL PROTEIN L39, MITOCHONDRIAL, TRANSCRIPT VARIANT X4; 39S RIBOSOMAL PROTEIN L39, MITOCHONDRIAL, TRANSCRIPT VARIANT X5; 39S RIBOSOMAL PROTEIN L39, MITOCHONDRIAL, TRANSCRIPT VARIANT X1; 39S RIBOSOMAL PROTEIN L39, MITOCHONDRIAL, TRANSCRIPT VARIANT X3
8438	PORTHOMCL8438[DrGgMmOlPsXl|(11 genes, 6 taxa)]:	-0.429176	-0.706936	-0.889396	-0.36458	-0.811433	-0.816718	0	0	0	0	0	-0.669706	HOXA6;HOXC6	Q588G2_PELSI;HOXC6	HOXC6;HOXA6	HOXC6.S;LOC108708639;LOC108718898;HOXC6	HOXC6A	HOXC6B;HOXC6A
1982	PORTHOMCL1982[AjBfCgCiDrGgLvMmOjOlPsSpXl|(21 genes, 13 taxa)]:	-0.458022	-0.704132	-0.552143	-0.854755	-0.616348	-0.830176	-0.44687	-0.864126	-0.712853	0.486958	0.0492647	-0.669263	RTCB	C22ORF28;RTCB	RTCB	RTCB.S;RTCB.L;RTCB	RTCB	RTCB	TRNA-SPLICING LIGASE RTCB HOMOLOG;RTCB	RTCB	RTCB_DANRE;RTCB_RAT;RTCB	HYPOTHETICAL PROTEIN;PUTATIVE TRNA-SPLICING LIGASE RTCB-LIKE	RTCB_DANRE;RTCB	TRNA-SPLICING LIGASE RTCB HOMOLOG, TRANSCRIPT VARIANT X1; TRNA-SPLICING LIGASE RTCB HOMOLOG, TRANSCRIPT VARIANT X2;RTCB
9076	PORTHOMCL9076[DrGgMmOlPsXl|(10 genes, 6 taxa)]:	-0.554066	-0.663341	-0.959451	-0.393848	-0.53348	-0.897674	0	0	0	0	0	-0.666977	NKD1	NKD1	NKD2;NKD1	NKD1.L;NKD1	NKD2A;NKD1;NKD2	NKD1;NKD2A;NKD3;NKD2
6082	PORTHOMCL6082[AjBfCgCiDrGgMmOjOlPsSpXl|(13 genes, 12 taxa)]:	-0.786209	-0.377846	-0.70956	-0.863358	-0.539559	-0.722147	-0.851117	-0.661189	-0.470971	0	-0.662132	-0.666447	B3GALNT2	B3GALNT2	B3GALNT2	B3GALNT2.L;B3GALNT2	B3GALNT2	B3GALNT2	UDP-GALNAC:BETA-1,3-N-ACETYLGALACTOSAMINYLTRANSFERASE 2	B3GALNT2	B3GL2_XENLA	PUTATIVE UDP-GALNAC:BETA-1,3-N-ACETYLGALACTOSAMINYLTRANSFERASE 2;PUTATIVE UDP-GALNAC:BETA-1,3-N-ACETYLGALACTOSAMINYLTRANSFERASE 2-LIKE ISOFORM X2;B3GALNT2		UDP-GALNAC:BETA-1,3-N-ACETYLGALACTOSAMINYLTRANSFERASE 2
12703	PORTHOMCL12703[DrGgMmOlPsXl|(6 genes, 6 taxa)]:	-0.167863	-0.753055	-0.889973	-0.831768	-0.386307	-0.968367	0	0	0	0	0	-0.666222	NKX6-1;NKX6-2	NKX6-1	NKX6-1	NKX6-1.L;NKX6-1	NKX6.1;NKX6-1	NKX6.1
6622	PORTHOMCL6622[AjBfCgCiDrGgLvMmOjOlPsSpXl|(13 genes, 13 taxa)]:	-0.640275	-0.945011	-0.577143	-0.836716	-0.785172	-0.208294	-0.876636	-0.859388	-0.860588	-0.785635	-0.748529	-0.665435		ZWILCH	ZWILCH	ZWILCH.S;ZWILCH	ZWILCH	ZWILCH	PROTEIN ZWILCH HOMOLOG		ZWILC_XENLA	HYPOTHETICAL PROTEIN	ZWILC_XENTR	PROTEIN ZWILCH HOMOLOG
2482	PORTHOMCL2482[AjBfCgCiDrGgLvMmOjOlPsSpXl|(19 genes, 13 taxa)]:	-0.665934	-0.858286	-0.574835	-0.688309	-0.550784	-0.652618	-0.754584	0.215846	-0.8325	-0.846316	-0.760539	-0.665128	IPO7	IPO7;IPO8	IPO7	IPO7.S;LOC108710748;IPO8;IPO7	IPO7;IPO8	IPO7	IMPORTIN-7;IPO8	IPO7	IPO7_HUMAN;IPO7	PUTATIVE IMPORTIN-7;PUTATIVE IMPORTIN-7 ISOFORM X2	IPO7_MOUSE	IMPORTIN-7, TRANSCRIPT VARIANT X2; IMPORTIN-7, TRANSCRIPT VARIANT X1;IPO7
999	PORTHOMCL999[AjBfCgCiDrGgLvMmOjOlPsSpXl|(29 genes, 13 taxa)]:	-0.396813	-0.797451	-0.568901	-0.857802	-0.47348	-0.894252	-0.394623	-0.523147	-0.423176	-0.811887	-0.10172	-0.664783	ATM	ATM	ATM	ATM.L	ATM	ATM	SERINE-PROTEIN KINASE ATM-LIKE;UNCHARACTERIZED LOC104266343;LOC104266316	ATM	ATM_PIG	PUTATIVE SERINE-PROTEIN KINASE ATM-LIKE;PUTATIVE SERINE-PROTEIN KINASE ATM;ATAXIA TELANGIECTASIA MUTATED	ATM_MOUSE;ATM_HUMAN	SERINE-PROTEIN KINASE ATM;ATAXIA TELANGIECTASIA MUTATED;SERINE-PROTEIN KINASE ATM-LIKE
4504	PORTHOMCL4504[AjBfCgCiDrGgMmOjOlPsSpXl|(15 genes, 12 taxa)]:	-0.657253	-0.85622	-0.580934	-0.525221	-0.453652	-0.896471	-0.737234	-0.673775	-0.301559	0	-0.677696	-0.661625	NAP1L1	NAP1L1	NAP1L1;NAP1L2;NAP1L3	NAP1L1.L	NAP1L1	NAP1L1	NUCLEOSOME ASSEMBLY PROTEIN 1-LIKE 1;NAP1L1		NP1L1_MOUSE;NAP1L4	NUCLEOSOME ASSEMBLY PROTEIN;NAP1L4		NUCLEOSOME ASSEMBLY PROTEIN 1-LIKE 1, TRANSCRIPT VARIANT X5; NUCLEOSOME ASSEMBLY PROTEIN 1-LIKE 1, TRANSCRIPT VARIANT X3; NUCLEOSOME ASSEMBLY PROTEIN 1-LIKE 1, TRANSCRIPT VARIANT X4; NUCLEOSOME ASSEMBLY PROTEIN 1-LIKE 1, TRANSCRIPT VARIANT X2; NUCLEOSOME ASSEMBLY PROTEIN 1-LIKE 1, TRANSCRIPT VARIANT X1;NUCLEOSOME ASSEMBLY PROTEIN 1-LIKE 1
2802	PORTHOMCL2802[AjBfCgCiDrGgLvMmOjOlPsSpXl|(18 genes, 13 taxa)]:	-0.438846	-0.549319	-0.553571	-0.88049	-0.740392	-0.806059	-0.574844	0.11979	0.215676	0.264293	-0.50049	-0.661446	PSMD4	PSMD4	PSMD4	PSMD4.L;PSMD4	PSMD4B;PSMD4A	PSMD4A;PSMD4B	26S PROTEASOME NON-ATPASE REGULATORY SUBUNIT 4-LIKE		PSMD4_HUMAN;PSMD4	26S PROTEASOME NON-ATPASE SUBUNIT 4-LIKE PROTEIN	PSMD4_BOVIN	26S PROTEASOME NON-ATPASE REGULATORY SUBUNIT 4, TRANSCRIPT VARIANT X2; 26S PROTEASOME NON-ATPASE REGULATORY SUBUNIT 4, TRANSCRIPT VARIANT X1
11064	PORTHOMCL11064[DrGgLvMmOlPsXl|(7 genes, 7 taxa)]:	-0.0764286	-0.76022	-0.698516	-0.607231	-0.914485	-0.904871	0	0	0	-0.024066	0	-0.660292		WTIP	WTIP	WTIP.L;WTIP	WTIP	WTIP					AJUBA_DROME
4764	PORTHOMCL4764[AjBfCgCiDrGgLvMmOjOlPsSpXl|(15 genes, 13 taxa)]:	-0.401758	-0.732967	-0.545824	-0.922647	-0.642132	-0.714529	-0.353545	-0.718761	-0.113176	-0.466419	-0.613848	-0.659976	LARS	LARS	LARS	LARS.L;LARS	LARSB	LARSA	LEUCINE--TRNA LIGASE, CYTOPLASMIC, TRANSCRIPT VARIANT X2; LEUCINE--TRNA LIGASE, CYTOPLASMIC, TRANSCRIPT VARIANT X1;LARS	LARS	SYLC_HUMAN;LARS	PUTATIVE LEUCINE--TRNA LIGASE, CYTOPLASMIC-LIKE	SYLC_HUMAN	LEUCINE--TRNA LIGASE, CYTOPLASMIC-LIKE;LEUCINE--TRNA LIGASE, CYTOPLASMIC
2496	PORTHOMCL2496[AjBfCgCiDrGgLvMmOjOlPsSpXl|(19 genes, 13 taxa)]:	-0.408132	-0.552044	-0.566099	-0.972745	-0.810245	-0.634912	0.148299	-0.281958	0.447853	-0.441775	-0.646201	-0.657363	PSMD2	PSMD2	PSMD2	PSMD2.L	PSMD2	CABZ01113954.1;CABZ01067681.1;PSMD2	26S PROTEASOME NON-ATPASE REGULATORY SUBUNIT 2-LIKE, TRANSCRIPT VARIANT X1; 26S PROTEASOME NON-ATPASE REGULATORY SUBUNIT 2-LIKE, TRANSCRIPT VARIANT X2	PSMD2	PSMD2_PONAB;PSMD2	26S PROTEASOME NON-ATPASE REGULATORY SUBUNIT 2-LIKE PROTEIN;PUTATIVE 26S PROTEASOME NON-ATPASE REGULATORY SUBUNIT 2;HYPOTHETICAL PROTEIN;PSMD2	PSMD2_RAT;PSMD2_MOUSE	26S PROTEASOME NON-ATPASE REGULATORY SUBUNIT 2
4123	PORTHOMCL4123[AjBfCgCiDrGgLvMmOjOlPsSpXl|(16 genes, 13 taxa)]:	-0.463956	-0.765758	-0.709615	-0.875049	-0.65	-0.479176	-0.564727	-0.498741	-0.497588	-0.494923	0.0405637	-0.657259	USP5;USP13	USP5	USP5	USP5.L;USP5.S;USP5	USP5	USP5	ZINC FINGER (UBIQUITIN THIOLESTERASE TYPE)-1;USP5	USP5	UBP5_HUMAN;USP5	PUTATIVE UBIQUITIN CARBOXYL-TERMINAL HYDROLASE 5;PUTATIVE UBIQUITIN CARBOXYL-TERMINAL HYDROLASE 5-LIKE	UBP5_MOUSE;USP5	UBIQUITIN CARBOXYL-TERMINAL HYDROLASE 5;USP5
3673	PORTHOMCL3673[AjBfCgDrGgLvMmOjOlPsSpXl|(16 genes, 12 taxa)]:	-0.427802	-0.711341	-0.57967	-0.847353	-0.436961	-0.920118	0	-0.931368	-0.689735	-0.269544	-0.65674	-0.653874	PTCD3	PTCD3	PTCD3	PTCD3.L;PTCD3	PTCD3	PTCD3		PTCD3	PTCD3_MOUSE	PUTATIVE PENTATRICOPEPTIDE REPEAT DOMAIN-CONTAINING PROTEIN 3, MITOCHONDRIAL	PTCD3_BOVIN	PENTATRICOPEPTIDE REPEAT DOMAIN-CONTAINING PROTEIN 3, MITOCHONDRIAL;PENTATRICOPEPTIDE REPEAT DOMAIN-CONTAINING PROTEIN 3, MITOCHONDRIAL-LIKE
4923	PORTHOMCL4923[AjBfCgCiDrGgLvMmOjOlPsSpXl|(15 genes, 13 taxa)]:	-0.349011	-0.600923	-0.560385	-0.699093	-0.874485	-0.830353	-0.781662	-0.218085	0.156206	0.0118679	0.0498775	-0.652375	DCTN5	DCTN5	DCTN5	LOC108701903;DCTN5.S;DCTN5	DCTN5	DCTN5	DYNACTIN SUBUNIT 5-LIKE;DCTN5	DCTN5	DCTN5_MOUSE;DCTN5	PUTATIVE DYNACTIN SUBUNIT 5 ISOFORM X2;DCTN5	DCTN5_MOUSE	DYNACTIN SUBUNIT 5, TRANSCRIPT VARIANT X1; DYNACTIN SUBUNIT 5, TRANSCRIPT VARIANT X2;MEMBRANE PROGESTIN RECEPTOR GAMMA-A, TRANSCRIPT VARIANT X2; MEMBRANE PROGESTIN RECEPTOR GAMMA-A, TRANSCRIPT VARIANT X1;DCTN5
9523	PORTHOMCL9523[DrGgMmOlPsSpXl|(9 genes, 7 taxa)]:	-0.091978	-0.843165	-0.790165	-0.696882	-0.59625	-0.888912	0	0	0	0	-0.594853	-0.651225	TMEFF1		TMEFF1	TMEFF1.S;TMEFF1	TRANSMEMBRANE PROTEIN WITH EGF LIKE AND TWO FOLLISTATIN LIKE DOMAINS 1;TOMOREGULIN-1;TMEFF1;TMEFF1A	TMEFF1A;TMEFF1B						AGRIN
5682	PORTHOMCL5682[AjBfCgCiDrGgLvMmOjOlPsSpXl|(14 genes, 13 taxa)]:	-0.205714	-0.697319	-0.567253	-0.892618	-0.656127	-0.873419	-0.768974	-0.603643	0.754647	0.260599	-0.355882	-0.648742	NIF3L1	NIF3L1	NIF3L1	NIF3L1.S;NIF3L1	NIF3L1	NIF3L1	NIF3-LIKE PROTEIN 1;NIF3L1	NIF3L1	NIF3L_BOVIN;NIF3L1	PUTATIVE GTP CYCLOHYDROLASE 1 TYPE 2 NIF3L1	NIF3L_BOVIN;NIF3L_HUMAN;NIF3L1	PUTATIVE GTP CYCLOHYDROLASE 1 TYPE 2 NIF3L1;NIF3L1
1987	PORTHOMCL1987[AjBfCgCiDrGgLvMmOjOlPsSpXl|(21 genes, 13 taxa)]:	-0.501484	-0.585055	-0.55989	-0.927451	-0.627132	-0.686206	-0.389091	0	-0.141706	-0.424582	-0.495466	-0.64787	PSMD1	PSMD1	PSMD1;GM21972	PSMD1.S;PSMD1.L;PSMD1	PSMD1	PSMD1	26S PROTEASOME NON-ATPASE REGULATORY SUBUNIT 1	PSMD1	PSMD1_MOUSE	PUTATIVE 26S PROTEASOME NON-ATPASE REGULATORY SUBUNIT 1-LIKE;26S PROTEASOME NON-ATPASE REGULATORY SUBUNIT 1;PSMD1	PSMD1_HUMAN;PSMD1_MOUSE;PSMD1_CHICK;PSMD1_PONAB;PSMD1	26S PROTEASOME NON-ATPASE REGULATORY SUBUNIT 1-LIKE
6370	PORTHOMCL6370[AjBfCiDrGgMmOjOlPsSpXl|(13 genes, 11 taxa)]:	-0.339341	-0.924044	-0.674615	-0.219534	-0.847585	-0.875647	-0.532571	-0.655944	-0.582559	0	-0.652941	-0.646794	IFT46	IFT46	IFT46	IFT46.S	IFT46	IFT46	INTRAFLAGELLAR TRANSPORT PROTEIN 46 HOMOLOG;IFT46	IFT46	IFT46_DANRE;IFT46	HYPOTHETICAL PROTEIN;PUTATIVE INTRAFLAGELLAR TRANSPORT PROTEIN;IFT46		INTRAFLAGELLAR TRANSPORT PROTEIN 46 HOMOLOG;IFT46
6293	PORTHOMCL6293[AjCgCiDrGgMmOjOlPsXl|(13 genes, 10 taxa)]:	-0.171758	-0.826681	-0.949231	-0.398231	-0.670241	-0.859713	0.481255	0	0.52994	0	0	-0.645976	LMX1B	LMX1B	LMX1B	LMX1B.1.S;LOC108698243;LMX1B	LMX1BB;LMX1BA	LMX1BB;LMX1BA	TRANSCRIPTION FACTOR PROTEIN		LMX1B_HUMAN	PUTATIVE LIM HOMEOBOX TRANSCRIPTION FACTOR 1-BETA ISOFORM X3
2383	PORTHOMCL2383[AjBfCgCiDrGgLvMmOjOlPsSpXl|(20 genes, 13 taxa)]:	-0.663516	-0.634418	-0.650659	-0.512819	-0.568064	-0.832856	-0.91274	0.418392	-0.884235	-0.32033	-0.163971	-0.643722	WARS	WARS	WARS	WARS.L;WARS.S;WARS	WARS	WARS;CABZ01109604.1	TRYPTOPHAN--TRNA LIGASE, CYTOPLASMIC-LIKE;WARS	WARS	SYWC_HUMAN	PUTATIVE TRYPTOPHAN--TRNA LIGASE, CYTOPLASMIC;WARS	SYWC_BOVIN;WARS	TRYPTOPHAN--TRNA LIGASE, CYTOPLASMIC;TRYPTOPHAN--TRNA LIGASE, CYTOPLASMIC-LIKE;WARS;WARS1
6844	PORTHOMCL6844[AjBfCiDrGgMmOjOlPsSpXl|(13 genes, 11 taxa)]:	-0.478462	-0.925011	-0.563022	-0.778725	-0.191078	-0.915	-0.757117	0.497483	-0.724147	0	-0.119363	-0.641883	TFAM	TFAM	TFAM	TFAM.L;TFAM.S;TFAM	TFAM	TFAM	TRANSCRIPTION FACTOR PROTEIN		TFAM_RAT;TFAM_TRACR	PUTATIVE TRANSCRIPTION FACTOR A, MITOCHONDRIAL		TRANSCRIPTION FACTOR A, MITOCHONDRIAL
2984	PORTHOMCL2984[AjBfCgCiDrGgLvMmOjOlPsSpXl|(18 genes, 13 taxa)]:	-0.543242	-0.876615	-0.559945	-0.561103	-0.879804	-0.426882	-0.77926	-0.58021	-0.263118	-0.272054	-0.757721	-0.641265	XRCC5	XRCC5	XRCC5	XRCC5.L;XRCC5	XRCC5	XRCC5	ZINC FINGER PROTEIN ZF(C2H2)-102	XRCC5	XRCC5_HUMAN;XRCC5_MOUSE	PUTATIVE X-RAY REPAIR CROSS-COMPLEMENTING PROTEIN 5;XRCC5	XRCC5_HUMAN	X-RAY REPAIR CROSS-COMPLEMENTING PROTEIN 5;XRCC5
4062	PORTHOMCL4062[AjBfCgCiDrGgLvMmOjOlPsSpXl|(16 genes, 13 taxa)]:	-0.539725	-0.883516	-0.87022	-0.340833	-0.496078	-0.713824	-0.77387	-0.276285	-0.400941	-0.186233	-0.444485	-0.640699	IFT74	IFT74	IFT74	LOC108706942;IFT74.L;IFT74	IFT74	IFT74	INTRAFLAGELLAR TRANSPORT PROTEIN 74 HOMOLOG, TRANSCRIPT VARIANT X1; INTRAFLAGELLAR TRANSPORT PROTEIN 74 HOMOLOG, TRANSCRIPT VARIANT X2;IFT74	IFT74	IFT74_MOUSE;IFT74	PUTATIVE INTRAFLAGELLAR TRANSPORT PROTEIN;IFT74	IFT74_MOUSE;IFT74	INTRAFLAGELLAR TRANSPORT PROTEIN 74 HOMOLOG;IFT74
4305	PORTHOMCL4305[DrGgMmOlPsXl|(16 genes, 6 taxa)]:	-0.196868	-0.675297	-0.909725	-0.34865	-0.752049	-0.957748	0	0	0	0	0	-0.640056	HES5	HES5	HES5	HES8.L;HES5.1.L;HES8.S	HER4.2	HER4.2;HER4.4;HER4.3;HER4.1
3951	PORTHOMCL3951[AjBfCgCiDrGgLvMmOjOlPsSpXl|(16 genes, 13 taxa)]:	-0.582692	-0.737802	-0.517363	-0.718284	-0.602157	-0.678706	-0.0851429	-0.6417	0.413559	-0.643529	0.239338	-0.639501	PFDN4	PFDN4	PFDN4	PFDN4.S;LOC108700907;PFDN4	PFDN4	PFDN4	PREFOLDIN SUBUNIT 4-LIKE, TRANSCRIPT VARIANT X1; PREFOLDIN SUBUNIT 4-LIKE, TRANSCRIPT VARIANT X2;PFDN4	EOG090X0JBP	PFD4_BOVIN	HYPOTHETICAL PROTEIN;PUTATIVE PREFOLDIN SUBUNIT 4;PFDN4	PFD4_HUMAN	PREFOLDIN SUBUNIT 4;PFDN4
8885	PORTHOMCL8885[CiDrGgMmOlPsXl|(10 genes, 7 taxa)]:	-0.229656	-0.882635	-0.655055	-0.300775	-0.855441	-0.89906	-0.441392	0	0	0	0	-0.637104	ZIC5	ZIC5	ZIC5	ZIC5.S;ZIC5.L;ZIC5	ZIC5;ZINC FINGER PROTEIN ZIC 4	ZIC5	ZIC-LIKE PROTEIN 1
4680	PORTHOMCL4680[AjBfCgCiDrGgMmOjOlPsSpXl|(15 genes, 12 taxa)]:	-0.425165	-0.559736	-0.544615	-0.688039	-0.650588	-0.932853	-0.802104	0	-0.827971	0	-0.261152	-0.633499	NUBP2	NUBP2	NUBP2	NUBP2.L;NUBP2	NUBP2	NUBP2	CYTOSOLIC FE-S CLUSTER ASSEMBLY FACTOR NUBP2 HOMOLOG;NUBP2	NUBP2	NUBP2_NEMVE;NUBP2	PUTATIVE CYTOSOLIC FE-S CLUSTER ASSEMBLY FACTOR NUBP2-LIKE;NUBP2		CYTOSOLIC FE-S CLUSTER ASSEMBLY FACTOR NUBP2 HOMOLOG;NUBP2
4282	PORTHOMCL4282[CgCiDrGgLvMmOjOlPsSpXl|(16 genes, 11 taxa)]:	-0.290587	-0.69628	-0.834998	-0.831159	-0.368125	-0.772444	0.709724	0	0.76402	0.649174	0	-0.632265	TLX1	TLX1	TLX3;TLX1;TLX2	TLX1.L;LOC108697427;TLX1	TLX1	TLX1;TLX2;TLX3	TRANSCRIPTION FACTOR PROTEIN; TRANSCRIPTION FACTOR PROTEIN, TRANSCRIPT VARIANT X1		TLX3_CHICK;TLX1		TLX3_MOUSE	T-CELL LEUKEMIA HOMEOBOX PROTEIN 3
6912	PORTHOMCL6912[BfCgCiDrGgLvMmOjOlPsSpXl|(13 genes, 12 taxa)]:	-0.441703	-0.768659	-0.513956	-0.8175	-0.559436	-0.67847	-0.677351	0.335175	-0.636235	-0.669329	-0.837132	-0.629954	EIF2A	EIF2A	EIF2A	EIF2A.L;EIF2A.S;EIF2A	EIF3BB;EIF3B	EIF2A	EUKARYOTIC TRANSLATION INITIATION FACTOR 2A, TRANSCRIPT VARIANT X2; EUKARYOTIC TRANSLATION INITIATION FACTOR 2A, TRANSCRIPT VARIANT X1;EIF2A		EIF2A_XENLA		EIF2A_XENLA;EIF2A	EUKARYOTIC TRANSLATION INITIATION FACTOR 2A;EIF2A
3178	PORTHOMCL3178[AjBfCgCiDrGgMmOjOlPsSpXl|(17 genes, 12 taxa)]:	-0.607527	-0.587473	-0.552802	-0.835858	-0.550441	-0.641735	-0.174545	0	-0.145413	0	-0.864338	-0.629306	AARS	AARS	AARS	AARS.L;AARS	AARS	AARS	ALANINE--TRNA LIGASE, CYTOPLASMIC;AARS	AARS	SYAC_CAEEL	PUTATIVE ALANINE--TRNA LIGASE, CYTOPLASMIC;ALANINE--TRNA LIGASE, CYTOPLASMIC;ALANYL-TRNA SYNTHETASE;AATS		ALANINE--TRNA LIGASE, CYTOPLASMIC;UNCHARACTERIZED LOC100893837, TRANSCRIPT VARIANT X1; UNCHARACTERIZED LOC100893837, TRANSCRIPT VARIANT X2;ALANINE--TRNA LIGASE, CYTOPLASMIC-LIKE
9613	PORTHOMCL9613[CiDrGgMmOlPsXl|(9 genes, 7 taxa)]:	-0.292747	-0.785407	-0.849505	-0.423214	-0.587778	-0.83266	0.77718	0	0	0	0	-0.628552	HOXD3	HOXD3	HOXD3	HOXD3.S;HOXD3.L;HOXD3	HOXD3A	HOXC3A;HOXD3A	HOMEOPROTEIN 3, TRANSCRIPT VARIANT X1; HOMEOPROTEIN 3; HOMEOPROTEIN 3, TRANSCRIPT VARIANT X2
6788	PORTHOMCL6788[AjCgCiDrGgLvMmOjOlPsSpXl|(13 genes, 12 taxa)]:	-0.430385	-0.815648	-0.430769	-0.43201	-0.737525	-0.921941	-0.769247	0	-0.689882	-0.0513106	-0.492402	-0.628046		OGFOD1	OGFOD1	OGFOD1.L;OGFOD1	OGFOD1	OGFOD1	PROLYL 3-HYDROXYLASE OGFOD1-LIKE;OGFOD1		OGFD1_BOVIN;OGFOD1	PUTATIVE 2-OXOGLUTARATE AND IRON-DEPENDENT OXYGENASE DOMAIN-CONTAINING PROTEIN 1 ISOFORM 1;OGFOD1	OGFD1_BOVIN	PROLYL 3-HYDROXYLASE OGFOD1, TRANSCRIPT VARIANT X1; PROLYL 3-HYDROXYLASE OGFOD1, TRANSCRIPT VARIANT X2
4741	PORTHOMCL4741[AjBfCgCiDrGgLvMmOjOlPsSpXl|(15 genes, 13 taxa)]:	-0.41978	-0.518637	-0.509176	-0.892598	-0.62625	-0.801353	0.0437403	-0.251425	0.0558824	-0.00875129	-0.0128676	-0.627966	PSMB2	PSMB2	PSMB2	PSMB2.S;PSMB2.L;PSMB2	PSMB2	PSMB2	PROTEASOME SUBUNIT BETA TYPE-2-LIKE;PSMB2	PSMB2	PSB2_RAT;PSMB2	PUTATIVE PROTEASOME SUBUNIT BETA TYPE-2;PSMB2	PSB2_BOVIN;PSMB2	PROTEASOME SUBUNIT BETA TYPE-2;PSMB2
2067	PORTHOMCL2067[AjBfCgCiDrGgLvMmOjOlPsSpXl|(21 genes, 13 taxa)]:	-0.492912	-0.798769	-0.547637	-0.649559	-0.750417	-0.526412	-0.831195	0.781958	-0.894647	-0.790588	-0.687255	-0.627618	RANGAP1	RANGAP1	RANGAP1	RANGAP1.L;LOC108701885;RANGAP1.S;RANGAP1	RANGAP1B;RANGAP1A;RANGAP1	RANGAP1A;RANGAP1B	RAN GTPASE-ACTIVATING PROTEIN 1-LIKE;RANGAP1			PUTATIVE RAN GTPASE-ACTIVATING PROTEIN 1	RAGP1_XENLA;RANGAP1	GTPASE ACTIVATING PROTEIN RANGAP1;RAN GTPASE-ACTIVATING PROTEIN 1
4054	PORTHOMCL4054[AjBfCgCiDrGgLvMmOjOlPsSpXl|(16 genes, 13 taxa)]:	-0.32489	-0.742637	-0.710769	-0.69848	-0.873529	-0.412	-0.779584	0.248252	-0.882	-0.44066	-0.663113	-0.627051		ANAPC4	ANAPC4	ANAPC4.L;ANAPC4	ANAPC4	ANAPC4	ANAPHASE-PROMOTING COMPLEX SUBUNIT 4;LOC100186302	ANAPC4	APC4_MOUSE;ANAPC4	PUTATIVE ANAPHASE-PROMOTING COMPLEX SUBUNIT 4-LIKE	APC4_MOUSE	ANAPHASE-PROMOTING COMPLEX SUBUNIT 4;ANAPHASE-PROMOTING COMPLEX SUBUNIT 4-LIKE;ANAPC4
2393	PORTHOMCL2393[AjBfCgCiDrGgMmOjOlPsSpXl|(20 genes, 12 taxa)]:	-0.436429	-0.384484	-0.477802	-0.727328	-0.879363	-0.856	0.840416	-0.459108	0.495971	0	0.234681	-0.626901	EIF5A2;EIF5A	EIF5A	EIF5A;EIF5A2	EIF5A.L;EIF5A.S;EIF5A	EIF5A2;EIF5AL1;EUKARYOTIC TRANSLATION INITIATION FACTOR 5A-1;EIF5A	EIF5A;EIF5A2	EUKARYOTIC TRANSLATION INITIATION FACTOR 5A, TRANSCRIPT VARIANT X1; EUKARYOTIC TRANSLATION INITIATION FACTOR 5A, TRANSCRIPT VARIANT X2		IF5A1_RABIT;EIF5A2	EUKARYOTIC TRANSLATION INITIATION FACTOR 5A		EUKARYOTIC TRANSLATION INITIATION FACTOR 5A-1
1327	PORTHOMCL1327[AjBfCgCiDrGgLvMmOjOlPsSpXl|(26 genes, 13 taxa)]:	-0.196813	-0.691253	-0.681593	-0.528596	-0.73826	-0.923412	-0.87274	0	-0.163	0.471269	-0.0515931	-0.626654	BCAR1;NEDD9;CASS4	NEDD9;CASS4	BCAR1;NEDD9;CASS4	NEDD9.L;BCAR1.L;NEDD9.S;CASS4.L;BCAR1.S;NEDD9;BCAR1	NEDD9;BCAR1;CASS4	NEDD9;BCAR1;CASS4	BREAST CANCER ANTI-ESTROGEN RESISTANCE PROTEIN 1-LIKE		CASL_MOUSE	PUTATIVE BREAST CANCER ANTI-ESTROGEN RESISTANCE PROTEIN 1-LIKE ISOFORM X1	BCAR1_HUMAN	BREAST CANCER ANTI-ESTROGEN RESISTANCE PROTEIN 1, TRANSCRIPT VARIANT X3; BREAST CANCER ANTI-ESTROGEN RESISTANCE PROTEIN 1, TRANSCRIPT VARIANT X1; BREAST CANCER ANTI-ESTROGEN RESISTANCE PROTEIN 1, TRANSCRIPT VARIANT X2; BREAST CANCER ANTI-ESTROGEN RESISTANCE PROTEIN 1, TRANSCRIPT VARIANT X5; BREAST CANCER ANTI-ESTROGEN RESISTANCE PROTEIN 1, TRANSCRIPT VARIANT X4
3949	PORTHOMCL3949[AjBfCgCiDrGgLvMmOjOlPsSpXl|(16 genes, 13 taxa)]:	-0.44978	-0.581055	-0.554396	-0.937794	-0.272059	-0.964445	-0.919468	-0.331189	0.398441	-0.609494	-0.51348	-0.626588	EIF2B2	EIF2B2	EIF2B2	EIF2B2.L;EIF2B2	EIF2B2	EIF2B2	TRANSLATION INITIATION FACTOR EIF-2B SUBUNIT BETA-LIKE;EIF2B2	EIF2B2	EI2BB_BOVIN;EIF2B2	PUTATIVE TRANSLATION INITIATION FACTOR EIF-2B SUBUNIT BETA-LIKE;EIF2B2	EI2BB_TAKRU;EI2BB_BOVIN	TRANSLATION INITIATION FACTOR EIF-2B SUBUNIT BETA;UNCHARACTERIZED LOC762814;EIF2B2
11791	PORTHOMCL11791[DrGgMmOlPsXl|(7 genes, 6 taxa)]:	-0.376264	-0.966989	-0.606758	-0.346544	-0.820637	-0.641118	0	0	0	0	0	-0.626385	HP1BP3	HP1BP3	HP1BP3	HP1BP3.L;HP1BP3.S;HP1BP3	HP1BP3	HP1BP3
3470	PORTHOMCL3470[AjCgDrGgLvMmOjOlPsSpXl|(17 genes, 11 taxa)]:	-0.101044	-0.811824	-0.798362	-0.36177	-0.727626	-0.951479	0	0	-0.858112	0.215558	0.661448	-0.625351	PRDM12	PRDM12	PRDM12	LOC108699953;PRDM12.L;PRDM12	PRDM12B;PR DOMAIN ZINC FINGER PROTEIN 12;PRDM12	PRDM12B;PRDM12			PRD12_MOUSE;PRDM12	PUTATIVE PR DOMAIN ZINC FINGER PROTEIN 12-LIKE;PRDM12	PRD12_HUMAN	PR DOMAIN ZINC FINGER PROTEIN 12-LIKE;PRDM12
3024	PORTHOMCL3024[AjBfCgDrGgLvMmOjOlPsSpXl|(18 genes, 12 taxa)]:	-0.457143	-0.65644	-0.639011	-0.718456	-0.566348	-0.713941	0	-0.73677	-0.700588	-0.75711	0.411152	-0.625223	WDR11	WDR11	WDR11	WDR11.L;WDR11	WDR11	WDR11			WDR11_HUMAN	HYPOTHETICAL PROTEIN;PUTATIVE WD REPEAT-CONTAINING PROTEIN 11	TNKS1_HUMAN	WD REPEAT-CONTAINING PROTEIN 11;WDR11
9821	PORTHOMCL9821[DrGgMmOlPsXl|(9 genes, 6 taxa)]:	-0.173022	-0.641495	-0.888352	-0.818607	-0.594307	-0.634941	0	0	0	0	0	-0.625121	RNF165	RNF165	RNF165	RNF165.L;RNF165.S;RNF165	RNF165B;RNF165A	RNF165B;RNF165A
12349	PORTHOMCL12349[DrGgMmOlPsXl|(6 genes, 6 taxa)]:	-0.674451	-0.853758	-0.911374	-0.414605	-0.731667	-0.163414	0	0	0	0	0	-0.624878	CCND1	CCND1	CCND1	CCND1.L	CCND1	CCND1
8601	PORTHOMCL8601[BfCgCiDrGgMmOjOlPsXl|(10 genes, 10 taxa)]:	-0.609451	-0.849143	-0.61967	-0.378186	-0.426715	-0.848529	-0.814143	0.355734	-0.908088	0	0	-0.621949	MALSU1	MALSU1	MALSU1	MALSU1.L;MALSU1	MITOCHONDRIAL ASSEMBLY OF RIBOSOMAL LARGE SUBUNIT 1;MALSU1	MALSU1	UNCHARACTERIZED LOC100186222	MALSU1	MASU1_MOUSE
8114	PORTHOMCL8114[AjBfCiDrGgMmOjOlPsXl|(11 genes, 10 taxa)]:	-0.508736	-0.144967	-0.558242	-0.890441	-0.700466	-0.928765	-0.704675	0.20237	-0.178971	0	0	-0.621936	FKBP3	FKBP3	FKBP3	FKBP3.L;FKBP3	FKBP3	FKBP3	FK506-BINDING PROTEIN 4-LIKE;PEPTIDYL-PROLYL CIS-TRANS ISOMERASE FKBP3-LIKE;FKBP3		FKBP3_RABIT;FKBP3	HYPOTHETICAL PROTEIN
5106	PORTHOMCL5106[BfCgCiDrGgMmOjOlPsSpXl|(15 genes, 11 taxa)]:	-0.617418	-0.86167	-0.307802	-0.471593	-0.685025	-0.781794	0.237701	-0.439333	0.652382	0	0.293995	-0.620884	MTPN	MTPN	MTPN	MTPN.L;MTPN.S;MTPN	MYOTROPHIN;MTPN	MTPN	MYOTROPHIN-LIKE		MTPN_DANRE;EM506_ARATH			SERINE/THREONINE-PROTEIN PHOSPHATASE 6 REGULATORY ANKYRIN REPEAT SUBUNIT B-LIKE;MYOTROPHIN;ANKYRIN REPEAT DOMAIN-CONTAINING PROTEIN 50-LIKE
4265	PORTHOMCL4265[AjBfCgCiDrGgLvMmOjOlPsSpXl|(16 genes, 13 taxa)]:	-0.443022	-0.665934	-0.508791	-0.423284	-0.790221	-0.893059	0.835117	-0.189231	0.828176	0.713994	0.51973	-0.620718	RPL22	RPL22	RPL22	RPL22.S;RPL22.L;RPL22	RPL22;60S RIBOSOMAL PROTEIN L22	RPL22	60S RIBOSOMAL PROTEIN L22-LIKE;RPL22	RPL22L1	RL22_PIG;RPL22	PUTATIVE 60S RIBOSOMAL PROTEIN L22-LIKE	RL22_TRIGR;RPL22	60S RIBOSOMAL PROTEIN L22;RPL22
7767	PORTHOMCL7767[DrGgMmOlPsXl|(12 genes, 6 taxa)]:	-0.314333	-0.542169	-0.788626	-0.478626	-0.713113	-0.865313	0	0	0	0	0	-0.61703	HOXC9;HOXD9	HOXC9	HOXC9;HOXD9	HOXD9.L;LOC108709896;HOXD9.S;HOXC9.L;HOXC9	HOXC9	HOXC9A;HOXD9A
3743	PORTHOMCL3743[AjBfCgCiDrGgLvMmOjOlPsSpXl|(16 genes, 13 taxa)]:	-0.385549	-0.648264	-0.296319	-0.816446	-0.701985	-0.851934	-0.740312	0.345245	-0.846412	-0.568318	-0.298407	-0.61675	MTO1	MTO1	MTO1	LOC108704178;LOC108706133;MTO1	MTO1	MTO1	PROTEIN MTO1 HOMOLOG, MITOCHONDRIAL-LIKE;MTO1	MTO1	MTO1_MACFA;MTO1	HYPOTHETICAL PROTEIN;MTO1	MTO1_MACFA;MTO1	PROTEIN MTO1 HOMOLOG, MITOCHONDRIAL, TRANSCRIPT VARIANT X1; PROTEIN MTO1 HOMOLOG, MITOCHONDRIAL, TRANSCRIPT VARIANT X2;MTO1
6800	PORTHOMCL6800[AjCgCiDrGgLvMmOjOlPsSpXl|(13 genes, 12 taxa)]:	-0.443736	-0.862418	-0.763846	-0.062598	-0.606706	-0.951479	-0.0741169	0	-0.781529	-0.595893	-0.194118	-0.615131	CEP89	CEP89	CEP89	CEP89.L;CEP89	CEP89	CEP89	CENTROSOMAL PROTEIN OF 89 KDA-LIKE		CEP89_HUMAN	PUTATIVE CENTROSOMAL PROTEIN	CEP89_HUMAN	CENTROSOMAL PROTEIN OF 89 KDA
8714	PORTHOMCL8714[CgCiDrGgLvMmOlPsXl|(10 genes, 9 taxa)]:	-0.386758	-0.930505	-0.481703	-0.519118	-0.598701	-0.771824	0.0398571	0	0	-0.7813	0	-0.614768	IMPA1	IMPA1	IMPA1	IMPA1.L	IMPA1;INOSITOL MONOPHOSPHATASE 1	IMPA1	INOSITOL MONOPHOSPHATASE 1-LIKE;IMPA1				IMPA1_BOVIN
3479	PORTHOMCL3479[AjBfCgCiDrGgLvMmOjOlPsSpXl|(17 genes, 13 taxa)]:	-0.526209	-0.657538	-0.54533	-0.360662	-0.859387	-0.737794	0.529338	0.121469	0.4435	0.419051	-0.630637	-0.614487	PPA1	PPA1	PPA1	PPA2.S;PPA2.L;PPA1	PPA1B;PPA1A	PPA1B;PPA1A	INORGANIC PYROPHOSPHATASE-LIKE, TRANSCRIPT VARIANT X3; INORGANIC PYROPHOSPHATASE-LIKE, TRANSCRIPT VARIANT X2; INORGANIC PYROPHOSPHATASE-LIKE, TRANSCRIPT VARIANT X1		IPYR_MOUSE;IPP1	PUTATIVE INORGANIC PYROPHOSPHATASE-LIKE	IPYR_DROME;IPYR_EMENI	INORGANIC PYROPHOSPHATASE;IPP1
4681	PORTHOMCL4681[AjBfCgCiDrGgLvMmOjOlPsSpXl|(15 genes, 13 taxa)]:	-0.693352	-0.90233	-0.476593	-0.927623	-0.0408824	-0.638971	-0.825558	-0.0365031	-0.171882	-0.553891	-0.803807	-0.613292	ORC5	ORC5	ORC5	ORC5.L;ORC5	ORC5	ORC5	ORIGIN RECOGNITION COMPLEX SUBUNIT 5-LIKE;ORC5	ORC5	ORC5_MOUSE;ORC5	PUTATIVE ORIGIN RECOGNITION COMPLEX SUBUNIT 5;ORC5	ORC5_MOUSE	ORIGIN RECOGNITION COMPLEX SUBUNIT 5;ORC5
4908	PORTHOMCL4908[AjBfCgCiDrGgLvMmOjOlPsSpXl|(15 genes, 13 taxa)]:	-0.587363	-0.544264	-0.589341	-0.875613	-0.587623	-0.494147	-0.548325	-0.566853	0.689559	0	0.0709559	-0.613058	PDDC1;GATD1	PDDC1;GATD1	PDDC1;GATD1	PDDC1.L;GATD1	GATD1	PDDC1	PARKINSON DISEASE 7 DOMAIN-CONTAINING PROTEIN 1, TRANSCRIPT VARIANT X2; PARKINSON DISEASE 7 DOMAIN-CONTAINING PROTEIN 1, TRANSCRIPT VARIANT X3; PARKINSON DISEASE 7 DOMAIN-CONTAINING PROTEIN 1, TRANSCRIPT VARIANT X1;GATD1	PDDC1	PDDC1_XENLA;GATD1	PUTATIVE PARKINSON DISEASE 7 DOMAIN-CONTAINING PROTEIN 1-LIKE		PARKINSON DISEASE 7 DOMAIN-CONTAINING PROTEIN 1
7621	PORTHOMCL7621[AjBfCgCiDrGgMmOlPsXl|(12 genes, 10 taxa)]:	-0.65489	-0.515253	-0.768571	-0.43424	-0.753971	-0.548382	-0.784273	-0.0663804	0	0	0	-0.612551	RABL6	RABL6	RABL6	LOC108699873;RABL6.L;RABL6	RABL6B;RABL6	RABL6 (1 OF MANY);RABL6B;RABL6	RAB-LIKE PROTEIN 6;RABL6	RABL6		PUTATIVE RAB-LIKE PROTEIN 6;RABL6
12833	PORTHOMCL12833[DrGgMmOlPsXl|(6 genes, 6 taxa)]:	-0.439945	-0.747604	-0.891429	-0.220787	-0.421376	-0.945557	0	0	0	0	0	-0.611116	HOXB6	HOXB6	HOXB6	HOXB6.S;HOXB6	HOXB6B	HOXB6B
1453	PORTHOMCL1453[AjBfCgCiDrGgLvMmOjOlPsSpXl|(25 genes, 13 taxa)]:	-0.575	-0.877231	-0.552582	-0.81777	-0.313676	-0.522912	-0.604468	-0.159091	-0.230294	-0.606646	-0.483088	-0.609862	HSPH1;HSPA4;HSPA4L	HSPA4	HSPA4;HSPA4L	HSPH1.S;HSPA4.L;HSPA4.S;HSPH1;HSPA4	HSPA4A;HSPA4B	HSPA4A;HSPA4B;HSPA4L;HSPH1	HEAT SHOCK 70 KDA PROTEIN 4L;HSPA4L	HSPA4A;HSPA4	HSP97_STRFN;HSP97_STRPU	97 KDA HEAT SHOCK PROTEIN;HSPA4L	HSP97_STRFN	HEAT SHOCK 70 KDA PROTEIN IV-LIKE;EGG RECEPTOR FOR SPERM, TRANSCRIPT VARIANT X1; EGG RECEPTOR FOR SPERM
9074	PORTHOMCL9074[DrGgMmOlPsXl|(10 genes, 6 taxa)]:	-0.482559	-0.571507	-0.702637	-0.383731	-0.7667	-0.748292	0	0	0	0	0	-0.609238	HOXC8;HOXD8	Q588G5_PELSI;HOXC8	HOXC8;HOXD8	XHOXC8;HOXD8.L;HOXC8.S;HOXC8	HOXC8	HOXC8A
8378	PORTHOMCL8378[BfCgDrGgMmOjOlPsXl|(11 genes, 9 taxa)]:	-0.56544	-0.695604	-0.958681	-0.74652	-0.130098	-0.54393	0	-0.778507	0.0543451	0	0	-0.606712	STRA6	STRA6	STRA6	STRA6.S;STRA6.L;STRA6	STRA6;RECEPTOR FOR RETINOL UPTAKE STRA6-LIKE	STRA6			NPT2B_MOUSE
6880	PORTHOMCL6880[AjBfDrGgLvMmOjOlPsSpXl|(13 genes, 11 taxa)]:	-0.0813187	-0.571297	-0.956209	-0.717619	-0.488693	-0.815197	0	0.0724476	0.534917	-0.250125	0.085968	-0.605056	ALX1	ALX1	ALX1	ALX1.L	ALX1	ALX1			ALX1_RAT;DRGX_MOUSE;ALX1_HUMAN;DRGX	PUTATIVE ALX HOMEOBOX PROTEIN 1	ALX4_MOUSE	ALX HOMEOBOX PROTEIN 1, TRANSCRIPT VARIANT X2; ALX HOMEOBOX PROTEIN 1, TRANSCRIPT VARIANT X1
4161	PORTHOMCL4161[AjBfCgCiDrGgLvMmOjOlPsSpXl|(16 genes, 13 taxa)]:	-0.290495	-0.779824	-0.578297	-0.598064	-0.761887	-0.619588	0.216468	-0.439333	-0.486235	-0.493395	-0.047549	-0.604692	BBS7	BBS7	BBS7	BBS7.L;BBS7	BBS7	BBS7	BARDET-BIEDL SYNDROME 7 PROTEIN HOMOLOG	BBS7	BBS7_MOUSE;BBS7	PUTATIVE BARDET-BIEDL SYNDROME 7 PROTEIN	BBS7_HUMAN;BBS7_MOUSE	BARDET-BIEDL SYNDROME 7 PROTEIN HOMOLOG, TRANSCRIPT VARIANT X3; BARDET-BIEDL SYNDROME 7 PROTEIN HOMOLOG, TRANSCRIPT VARIANT X2; BARDET-BIEDL SYNDROME 7 PROTEIN HOMOLOG, TRANSCRIPT VARIANT X1;BARDET-BIEDL SYNDROME 7 PROTEIN HOMOLOG;BBS7
4582	PORTHOMCL4582[AjBfCgCiDrGgMmOjOlPsSpXl|(15 genes, 12 taxa)]:	-0.380055	-0.521363	-0.538407	-0.916103	-0.36652	-0.900794	-0.280104	-0.0161538	-0.350853	0	-0.541912	-0.603873	PSMD3	PSMD3	PSMD3	PSMD3.L	PSMD3	PSMD3	26S PROTEASOME NON-ATPASE REGULATORY SUBUNIT 3, TRANSCRIPT VARIANT X1; 26S PROTEASOME NON-ATPASE REGULATORY SUBUNIT 3, TRANSCRIPT VARIANT X2;PSMD3	PSMD3	PSMD3_BOVIN;PSMD3	PUTATIVE 26S PROTEASOME NON-ATPASE REGULATORY SUBUNIT 3 ISOFORM X2;PSMD3		26S PROTEASOME NON-ATPASE REGULATORY SUBUNIT 3, TRANSCRIPT VARIANT X1; 26S PROTEASOME NON-ATPASE REGULATORY SUBUNIT 3, TRANSCRIPT VARIANT X3; 26S PROTEASOME NON-ATPASE REGULATORY SUBUNIT 3, TRANSCRIPT VARIANT X2;PSMD3
3542	PORTHOMCL3542[AjBfCgCiDrGgLvMmOjOlPsSpXl|(17 genes, 13 taxa)]:	-0.455989	-0.684132	-0.607967	-0.0701961	-0.866152	-0.936529	-0.806545	0.323566	-0.571853	0.475191	-0.570098	-0.603494	MRPL3	MRPL3	MRPL3	MRPL3.S;MRPL3.L;MRPL3	MRPL3	MRPL3	39S RIBOSOMAL PROTEIN L3, MITOCHONDRIAL-LIKE		RM03_MOUSE;MRPL3	PUTATIVE 39S RIBOSOMAL PROTEIN L3, MITOCHONDRIAL-LIKE;MRPL3	RM03_BOVIN;RM03_RAT;RL3_BACHK	39S RIBOSOMAL PROTEIN L3, MITOCHONDRIAL;39S RIBOSOMAL PROTEIN L3, MITOCHONDRIAL-LIKE;MRPL3
5663	PORTHOMCL5663[AjBfCgCiDrGgLvMmOlPsSpXl|(14 genes, 12 taxa)]:	-0.685824	-0.494725	-0.366813	-0.903333	-0.661127	-0.502029	-0.857532	-0.538392	0	0.254799	-0.156495	-0.602309	DPM1	DPM1	DPM1;GM20716	DPM1.S;LOC414689;DPM1	DPM1	DPM1	DOLICHOL-PHOSPHATE MANNOSYLTRANSFERASE SUBUNIT 1	DPM1		PUTATIVE DOLICHOL-PHOSPHATE MANNOSYLTRANSFERASE SUBUNIT 1	DPM1_MOUSE;DPM1	DOLICHOL-PHOSPHATE MANNOSYLTRANSFERASE SUBUNIT 1
4029	PORTHOMCL4029[AjBfCgCiDrGgLvMmOjOlPsSpXl|(16 genes, 13 taxa)]:	-0.418956	-0.649451	-0.466319	-0.612595	-0.700294	-0.764735	0.282987	0.155245	-0.856765	-0.50128	-0.00747549	-0.602058		OLA1	OLA1	OLA1.S	OLA1	OLA1	OBG-LIKE ATPASE 1		OLA1_DROME	HYPOTHETICAL PROTEIN	OLA1_DROME	OBG-LIKE ATPASE 1, TRANSCRIPT VARIANT X1; OBG-LIKE ATPASE 1, TRANSCRIPT VARIANT X2
12906	PORTHOMCL12906[DrGgMmOlPsXl|(6 genes, 6 taxa)]:	-0.260446	-0.636784	-0.943626	-0.457958	-0.549937	-0.760144	0	0	0	0	0	-0.601483	HOXC5	HOXC5	HOXC5	HOXC5.L	HOXC5A	HOXC5A;HOXC5
4257	PORTHOMCL4257[AjBfCgCiDrGgLvMmOjOlPsSpXl|(16 genes, 13 taxa)]:	-0.111659	-0.34882	-0.96956	-0.497643	-0.792121	-0.886247	0.279555	-0.484936	0.457428	0.828141	0.65613	-0.601008	DMRTA2	DMRTA1	DMRTA2	DMRTA2.L	DMRTA2	DMRTA2	TRANSCRIPTION FACTOR PROTEIN	DMRTA2	DMTA2_XENTR;DMRTA2	PUTATIVE DOUBLESEX- AND MAB-3-RELATED TRANSCRIPTION FACTOR A2;PUTATIVE DOUBLESEX- AND MAB-3-RELATED TRANSCRIPTION FACTOR A2-LIKE;HYPOTHETICAL PROTEIN	DMTA2_XENTR;DMRTA2	DOUBLESEX- AND MAB-3-RELATED TRANSCRIPTION FACTOR A2, TRANSCRIPT VARIANT X1; DOUBLESEX- AND MAB-3-RELATED TRANSCRIPTION FACTOR A2, TRANSCRIPT VARIANT X2;DMRTA2
2919	PORTHOMCL2919[AjBfCgCiDrGgLvMmOjOlPsSpXl|(18 genes, 13 taxa)]:	-0.469725	-0.747516	-0.548791	-0.608284	-0.68027	-0.547765	0.721468	-0.435053	0.542265	0.383509	0.238725	-0.600392	PA2G4	PA2G4	PA2G4	PA2G4.L;PA2G4.S;PA2G4	PA2G4A;PA2G4B	PA2G4A;PA2G4B	PROLIFERATION-ASSOCIATED PROTEIN 2G4	PA2G4	PA2G4_RAT	PUTATIVE PROLIFERATION-ASSOCIATED PROTEIN 2G4;HYPOTHETICAL PROTEIN;PA2G4	PA2G4_HUMAN;PA2G4_RAT;PA2G4	PROLIFERATION-ASSOCIATED PROTEIN 2G4;PA2G4
7834	PORTHOMCL7834[AjBfCiDrGgMmOlPsSpXl|(11 genes, 10 taxa)]:	-0.573462	-0.560967	-0.470604	-0.672917	-0.545532	-0.777559	-0.771078	0.371608	0	0	0.24951	-0.600173	MRPS18A	MRPS18A	MRPS18A	MRPS18A.L;MRPS18A	MRPS18A	MRPS18A	28S RIBOSOMAL PROTEIN S18A, MITOCHONDRIAL;MRPS18A			PUTATIVE 28S RIBOSOMAL PROTEIN S18A, MITOCHONDRIAL-LIKE;RPSR		28S RIBOSOMAL PROTEIN S18A, MITOCHONDRIAL-LIKE
8118	PORTHOMCL8118[AjCiDrGgMmOjOlPsXl|(11 genes, 9 taxa)]:	-0.697692	-0.835956	-0.530769	-0.508015	-0.34598	-0.682012	-0.909468	0	-0.851029	0	0	-0.600071	HNRNPA3	HNRNPA3;HNRNPA1	GM9242;GM17190	HNRNPA3.L	HNRNPA3	HNRNPA3	HETEROGENEOUS NUCLEAR RIBONUCLEOPROTEINS A2/B1, TRANSCRIPT VARIANT X2; HETEROGENEOUS NUCLEAR RIBONUCLEOPROTEINS A2/B1, TRANSCRIPT VARIANT X1		ROA1_XENLA	HETEROGENEOUS NUCLEAR RIBONUCLEOPROTEIN A3
4119	PORTHOMCL4119[AjBfCgCiDrGgLvMmOjOlPsSpXl|(16 genes, 13 taxa)]:	-0.593297	-0.580703	-0.518736	-0.880686	-0.590025	-0.436353	-0.853974	-0.907902	0.214118	0.0539938	-0.203186	-0.599967	ADRM1	ADRM1	ADRM1;GM9774	ADRM1.L;ADRM1.S;ADRM1	ADRM1;PROTEASOMAL UBIQUITIN RECEPTOR ADRM1	ADRM1	PROTEASOMAL UBIQUITIN RECEPTOR ADRM1-LIKE, TRANSCRIPT VARIANT X1; PROTEASOMAL UBIQUITIN RECEPTOR ADRM1-LIKE, TRANSCRIPT VARIANT X2;ADRM1	ADRM1	ADRM1_RAT;ADRM1	PUTATIVE PROTEASOMAL UBIQUITIN RECEPTOR ADRM1-LIKE	ADRM1_RAT;ADRM1	PROTEASOMAL UBIQUITIN RECEPTOR ADRM1
4133	PORTHOMCL4133[AjBfCgCiDrGgLvMmOjOlPsSpXl|(16 genes, 13 taxa)]:	-0.540604	-0.662725	-0.54456	-0.75951	-0.554632	-0.522294	0.103857	0.21688	-0.0228529	0.255996	-0.221936	-0.597388	PSMA6	PSMA6	PSMA6	PSMA6.L;PSMA6	PSMA6B;PSMA6	PSMA6A;PSMA6B;PSMA6	PROTEASOME SUBUNIT ALPHA TYPE-6-LIKE, TRANSCRIPT VARIANT X3; PROTEASOME SUBUNIT ALPHA TYPE-6-LIKE, TRANSCRIPT VARIANT X2; PROTEASOME SUBUNIT ALPHA TYPE-6-LIKE, TRANSCRIPT VARIANT X1;PSMA6	PSMA6	PSA6_RAT	PUTATIVE PROTEASOME SUBUNIT ALPHA TYPE-6-LIKE;PSMA6	PSA6_RAT	PROTEASOME SUBUNIT ALPHA TYPE-6;PSMA6
1824	PORTHOMCL1824[AjBfCgCiDrGgLvMmOjOlPsSpXl|(22 genes, 13 taxa)]:	-0.766044	-0.887868	-0.624505	-0.818922	-0.0809804	-0.398735	-0.623987	0.205664	0.504794	-0.229205	0.566033	-0.596176	CAND2	CAND1;CAND2	CAND1	CAND1.L;CAND1.S;CAND1	CAND1;CAND2	CAND1	CULLIN-ASSOCIATED NEDD8-DISSOCIATED PROTEIN 1	CAND1	CAND1_PONAB;CAND1_HUMAN;CAND1	PUTATIVE CULLIN-ASSOCIATED NEDD8-DISSOCIATED PROTEIN 1-LIKE;PUTATIVE CULLIN-ASSOCIATED NEDD8-DISSOCIATED PROTEIN 1-LIKE ISOFORM X2;PUTATIVE CULLIN-ASSOCIATED NEDD8-DISSOCIATED PROTEIN 1 ISOFORM X1	CAND1_PONAB;CAND1	CULLIN-ASSOCIATED NEDD8-DISSOCIATED PROTEIN 1, TRANSCRIPT VARIANT X1; CULLIN-ASSOCIATED NEDD8-DISSOCIATED PROTEIN 1, TRANSCRIPT VARIANT X2;CULLIN-ASSOCIATED NEDD8-DISSOCIATED PROTEIN 1-LIKE, TRANSCRIPT VARIANT X2; CULLIN-ASSOCIATED NEDD8-DISSOCIATED PROTEIN 1-LIKE, TRANSCRIPT VARIANT X1;CAND1
2374	PORTHOMCL2374[AjBfCgCiDrGgLvMmOjOlPsSpXl|(20 genes, 13 taxa)]:	-0.382143	-0.840132	-0.840659	-0.127941	-0.850368	-0.531618	-0.739429	0.212867	0.514676	-0.507901	-0.776088	-0.595477	ANAPC5	ANAPC5	ANAPC5;CATSPERB	ANAPC5.L;ANAPC5	ANAPC5	ANAPC5	ANAPHASE-PROMOTING COMPLEX SUBUNIT 5-LIKE;CATION CHANNEL SPERM-ASSOCIATED PROTEIN SUBUNIT BETA;LOC100175059	ANAPC5	CTSRB_HUMAN	PUTATIVE ANAPHASE-PROMOTING COMPLEX SUBUNIT 5 ISOFORM X2	APC5_MOUSE;CTSRB_HUMAN	ANAPHASE-PROMOTING COMPLEX SUBUNIT 5, TRANSCRIPT VARIANT X1; ANAPHASE-PROMOTING COMPLEX SUBUNIT 5, TRANSCRIPT VARIANT X2;CATION CHANNEL SPERM-ASSOCIATED PROTEIN SUBUNIT BETA-LIKE;UNCHARACTERIZED LOC754323
3405	PORTHOMCL3405[AjBfCgCiDrGgLvMmOjOlPsSpXl|(17 genes, 13 taxa)]:	-0.491429	-0.65622	-0.554286	-0.917377	-0.841471	-0.106676	0.177468	-0.96501	-0.473206	0.0206605	-0.722672	-0.594576	PSMD14	PSMD14	PSMD14	PSMD14.L;PSMD14.S;PSMD14	PSMD14	PSMD14	26S PROTEASOME NON-ATPASE REGULATORY SUBUNIT 14	PSMD14	PSDE_DROME;PSMD14	26S PROTEASOME NON-ATPASE REGULATORY SUBUNIT 14;PSMD14	PSDE_DROME;PSMD14	26S PROTEASOME NON-ATPASE REGULATORY SUBUNIT 14;PSMD14
6419	PORTHOMCL6419[AjBfCgCiDrGgLvMmOjOlPsXl|(13 genes, 12 taxa)]:	-0.109835	-0.885846	-0.345	-0.883701	-0.843799	-0.497588	-0.687273	0.66042	0.682147	-0.103612	0	-0.594295	MRPL55	MRPL55	MRPL55	MRPL55.L;RM55	MITOCHONDRIAL RIBOSOMAL PROTEIN L55	MRPL55	39S RIBOSOMAL PROTEIN L55, MITOCHONDRIAL-LIKE, TRANSCRIPT VARIANT X4; 39S RIBOSOMAL PROTEIN L55, MITOCHONDRIAL-LIKE, TRANSCRIPT VARIANT X2; 39S RIBOSOMAL PROTEIN L55, MITOCHONDRIAL-LIKE, TRANSCRIPT VARIANT X3; 39S RIBOSOMAL PROTEIN L55, MITOCHONDRIAL-LIKE, TRANSCRIPT VARIANT X1		RM55_HUMAN	PUTATIVE 39S RIBOSOMAL PROTEIN L55, MITOCHONDRIAL;MRPL55	RM55_DROME
1904	PORTHOMCL1904[AjBfCgCiDrGgLvMmOjOlPsSpXl|(22 genes, 13 taxa)]:	-0.309615	-0.706242	-0.460659	-0.693015	-0.531078	-0.863471	0.583844	-0.394126	0.538118	0.317626	-0.0498775	-0.594013	ACTR3;ACTR3B	ACTR3;ACTR3B	ACTR3	ACTR3.S;ACTR3.L;ACTR3	ACTR3	ACTR3B;ACTR3	ACTIN, CYTOPLASMIC-LIKE;ACTIN-RELATED PROTEIN 3-LIKE	ACTR3	ARP3_RAT;ACTR3B	PUTATIVE ACTIN-RELATED PROTEIN 3;ACTR3	ARP3_RAT;ACTR3	ACTIN-RELATED PROTEIN 3;ACTR3
4943	PORTHOMCL4943[AjBfCgCiDrGgLvMmOjOlPsSpXl|(15 genes, 13 taxa)]:	-0.437473	-0.702989	-0.542198	-0.463971	-0.775	-0.641971	-0.0876623	0.262657	-0.415324	0.413209	-0.443995	-0.593933	AIRC;PAICS	PAICS	PAICS	PAICS;PAICS.1.S	PAICS	PAICS	MULTIFUNCTIONAL PROTEIN ADE2-LIKE, TRANSCRIPT VARIANT X2; MULTIFUNCTIONAL PROTEIN ADE2-LIKE, TRANSCRIPT VARIANT X1		PUR6_CHICK	PUTATIVE MULTIFUNCTIONAL PROTEIN ADE2-LIKE;MULTIFUNCTIONAL PROTEIN ADE2	PUR6_DROME	MULTIFUNCTIONAL PROTEIN ADE2, TRANSCRIPT VARIANT X2; MULTIFUNCTIONAL PROTEIN ADE2, TRANSCRIPT VARIANT X4; MULTIFUNCTIONAL PROTEIN ADE2, TRANSCRIPT VARIANT X1; MULTIFUNCTIONAL PROTEIN ADE2, TRANSCRIPT VARIANT X3
13047	PORTHOMCL13047[DrGgMmOlPsXl|(6 genes, 6 taxa)]:	-0.812473	-0.306681	-0.813681	-0.106585	-0.694602	-0.828689	0	0	0	0	0	-0.593785	MEOX1	MEOX1	MEOX1	MEOX2.S	MEOX1	MEOX1
6457	PORTHOMCL6457[AjBfCgCiDrGgMmOjOlPsSpXl|(13 genes, 12 taxa)]:	-0.373846	-0.659341	-0.329725	-0.56799	-0.667083	-0.961735	0.739455	-0.155944	-0.872824	0	-0.734191	-0.593287	MRPL35	MRPL35	MRPL35	MRPL35.L;MRPL35	MRPL35	MRPL35	39S RIBOSOMAL PROTEIN L35, MITOCHONDRIAL-LIKE, TRANSCRIPT VARIANT X2; 39S RIBOSOMAL PROTEIN L35, MITOCHONDRIAL-LIKE, TRANSCRIPT VARIANT X1		RM35_BOVIN	HYPOTHETICAL PROTEIN;PUTATIVE 39S RIBOSOMAL PROTEIN L35, MITOCHONDRIAL ISOFORM X4;MRPL35		39S RIBOSOMAL PROTEIN L35, MITOCHONDRIAL, TRANSCRIPT VARIANT X1; 39S RIBOSOMAL PROTEIN L35, MITOCHONDRIAL, TRANSCRIPT VARIANT X4; 39S RIBOSOMAL PROTEIN L35, MITOCHONDRIAL, TRANSCRIPT VARIANT X3; 39S RIBOSOMAL PROTEIN L35, MITOCHONDRIAL, TRANSCRIPT VARIANT X2
2164	PORTHOMCL2164[DrGgMmOlPsXl|(21 genes, 6 taxa)]:	-0.320769	-0.713319	-0.986484	-0.540488	-0.246408	-0.742555	0	0	0	0	0	-0.591671	HBE;HBB	HBB	HBB-BH1;HBB-Y;HBB-BH2	LOC108702026;LOC108702418;LOC108703094;LOC100037217	GB;GB-BETA4	HBBE1.2;BA1;HBBE1.1;HBBE2;SI:CH211-5K11.12;ZGC:92880
3352	PORTHOMCL3352[AjBfCgCiDrGgLvMmOjOlPsSpXl|(17 genes, 13 taxa)]:	-0.73956	-0.961011	-0.679945	-0.720539	-0.41701	-0.0308824	-0.692662	-0.741818	-0.816441	-0.0765325	-0.679657	-0.591491	TYMS	TYMS	TYMS	TYMS.L;TYMS	TYMS	TYMS	THYMIDYLATE SYNTHASE-LIKE;TYMS	TYMS	TYSY_MOUSE;TYMS	HYPOTHETICAL PROTEIN;PUTATIVE THYMIDYLATE SYNTHASE;TYMS	TYSY_MOUSE;TYMS	THYMIDYLATE SYNTHASE;TYMS
8341	PORTHOMCL8341[BfCgCiDrGgMmOlPsXl|(11 genes, 9 taxa)]:	-0.469143	-0.522957	-0.529835	-0.220464	-0.886863	-0.909883	0.351226	-0.0430769	0	0	0	-0.589857	HOXA1	HOXA1	HOXA1	HOXA1.L;HOXA1.S;HOXA1	HOXA1A	HOXA1A;HOXC1A	HOMEOBOX TRANSCRIPTION FACTOR HOX1; HOMEOBOX TRANSCRIPTION FACTOR HOX1, TRANSCRIPT VARIANT X1	HOXA1
5744	PORTHOMCL5744[AjBfCgCiDrGgLvMmOjOlPsSpXl|(14 genes, 13 taxa)]:	-0.497363	-0.663692	-0.513956	-0.55527	-0.413775	-0.892912	0.00341558	0.111189	-0.382647	-0.668091	-0.545711	-0.589494	AIMP2	AIMP2	AIMP2	AIMP2.S;AIMP2.L;AIMP2	AIMP2	AIMP2	AMINOACYL TRNA SYNTHASE COMPLEX-INTERACTING MULTIFUNCTIONAL PROTEIN 2-LIKE, TRANSCRIPT VARIANT X1; AMINOACYL TRNA SYNTHASE COMPLEX-INTERACTING MULTIFUNCTIONAL PROTEIN 2-LIKE, TRANSCRIPT VARIANT X2	AIMP2	AIMP2_CRIGR	PUTATIVE AMINOACYL TRNA SYNTHASE COMPLEX-INTERACTING MULTIFUNCTIONAL PROTEIN 2;AIMP2	AIMP2_CRIGR;AIMP2	AMINOACYL TRNA SYNTHASE COMPLEX-INTERACTING MULTIFUNCTIONAL PROTEIN 2
5301	PORTHOMCL5301[AjBfCgCiDrGgLvMmOjOlPsSpXl|(14 genes, 13 taxa)]:	-0.41544	-0.748396	-0.377582	-0.662206	-0.520686	-0.800735	-0.324405	0.0747386	-0.0716765	-0.656471	-0.800613	-0.587508	MRPL15	MRPL15	MRPL15	MRPL15.L;MRPL15	MRPL15	MRPL15	39S RIBOSOMAL PROTEIN L15, MITOCHONDRIAL-LIKE;MRPL15	MRPL15	RM15_XENLA;MRPL15	PUTATIVE 39S RIBOSOMAL PROTEIN L15, MITOCHONDRIAL ISOFORM X2;PUTATIVE 39S RIBOSOMAL PROTEIN L15, MITOCHONDRIAL ISOFORM X1;MRPL15	RM15_XENLA;MRPL15	39S RIBOSOMAL PROTEIN L15, MITOCHONDRIAL, TRANSCRIPT VARIANT X1; 39S RIBOSOMAL PROTEIN L15, MITOCHONDRIAL, TRANSCRIPT VARIANT X2;MRPL15
9139	PORTHOMCL9139[BfCgCiDrGgMmOlPsXl|(9 genes, 9 taxa)]:	-0.157253	-0.66044	-0.649341	-0.713064	-0.790686	-0.554088	-0.673636	0.742448	0	0	0	-0.587479	FAM192A	FAM192A;PSME3IP1	FAM192A	FAM192A.S	FAM192A	FAM192A	PROTEIN FAM192A-LIKE
11523	PORTHOMCL11523[CiDrGgMmOlPsXl|(7 genes, 7 taxa)]:	-0.736868	-0.681451	-0.568187	-0.260662	-0.51076	-0.758029	-0.854	0	0	0	0	-0.585993	TJP1	TJP1	TJP1	LOC108712948;TJP1	TJP1B	TJP1B	TIGHT JUNCTION PROTEIN ZO-2, TRANSCRIPT VARIANT X2; TIGHT JUNCTION PROTEIN ZO-2, TRANSCRIPT VARIANT X3; TIGHT JUNCTION PROTEIN ZO-2, TRANSCRIPT VARIANT X1;LOC100185856
5484	PORTHOMCL5484[AjBfCgCiDrGgLvMmOjOlPsSpXl|(14 genes, 13 taxa)]:	-0.462308	-0.766198	-0.507088	-0.902647	-0.606005	-0.271059	-0.764805	-0.771888	-0.899794	-0.370898	0.123775	-0.585884	PDSS1	PDSS1	PDSS1	PDSS1.L;PDSS1	PDSS1	PDSS1	DECAPRENYL-DIPHOSPHATE SYNTHASE SUBUNIT 1-LIKE	PDSS1	DPS1_HUMAN;PDSS1	PUTATIVE DECAPRENYL-DIPHOSPHATE SYNTHASE SUBUNIT 1-LIKE	DPS1_HUMAN	DECAPRENYL-DIPHOSPHATE SYNTHASE SUBUNIT 1;PDSS1
4870	PORTHOMCL4870[AjBfDrGgLvMmOlPsSpXl|(15 genes, 10 taxa)]:	-0.355989	-0.706198	-0.942143	-0.437148	-0.405623	-0.665144	0	-0.443977	0	-0.461085	0.434043	-0.585374	SCUBE1	SCUBE3;SCUBE1	SCUBE1	LOC108712246;LOC108710724;SCUBE1	SCUBE1	SCUBE1				PUTATIVE SIGNAL PEPTIDE, CUB AND EGF-LIKE DOMAIN-CONTAINING PROTEIN 1 ISOFORM X9;HYPOTHETICAL PROTEIN	SCUB1_MOUSE;SCUBE2	UNCHARACTERIZED LOC580251
10905	PORTHOMCL10905[AjDrGgMmOlPsXl|(7 genes, 7 taxa)]:	-0.65478	-0.649538	-0.566593	-0.818873	-0.276275	-0.542941	0	0	0	0	0	-0.584833	MRPS15	MRPS15	MRPS15	MRPS15.L;MRPS15	MRPS15	MRPS15				PUTATIVE 28S RIBOSOMAL PROTEIN S15, MITOCHONDRIAL
4829	PORTHOMCL4829[AjCgCiDrGgLvMmOjOlPsSpXl|(15 genes, 12 taxa)]:	-0.263352	-0.764659	-0.764396	-0.595588	-0.253456	-0.866647	-0.857584	0	-0.664265	-0.572652	0.232475	-0.584683	EIF2AK4	EIF2AK4	EIF2AK4	EIF2AK4.L;EIF2AK4	EIF2AK4	EIF2AK4	EIF-2-ALPHA KINASE GCN2, TRANSCRIPT VARIANT X3; EIF-2-ALPHA KINASE GCN2, TRANSCRIPT VARIANT X2; EIF-2-ALPHA KINASE GCN2, TRANSCRIPT VARIANT X4; EIF-2-ALPHA KINASE GCN2, TRANSCRIPT VARIANT X1;EIF2AK4		E2AK4_MOUSE	PUTATIVE EUKARYOTIC TRANSLATION INITIATION FACTOR 2-ALPHA KINASE 4	E2AK4_HUMAN;EIF2AK4	EUKARYOTIC TRANSLATION INITIATION FACTOR 2-ALPHA KINASE 4;EIF2AK4
901	PORTHOMCL901[AjBfCgCiDrGgLvMmOjOlPsSpXl|(31 genes, 13 taxa)]:	-0.482033	-0.90989	-0.555934	-0.811103	-0.0461275	-0.694941	-0.793286	-0.440839	-0.215	-0.0652012	-0.678922	-0.583338	RARS;RARS2	RARS;RARS2	RARS;RARS2	RARS.S;RARS2.S;RARS;RARS2	RARS2	RARS;RARS2	ARGININE--TRNA LIGASE, CYTOPLASMIC;PROBABLE ARGININE--TRNA LIGASE, MITOCHONDRIAL;RARS;RARS2	RARS;RARS2	SYRC_XENTR;SYRM_BOVIN;RARS;RARS2	PUTATIVE ARGININE--TRNA LIGASE, CYTOPLASMIC;PUTATIVE ARGININE--TRNA LIGASE, MITOCHONDRIAL;RARS;RARS2	SYRM_BOVIN;SYRC_XENTR;RARS	ARGININE--TRNA LIGASE, CYTOPLASMIC;PROBABLE ARGININE--TRNA LIGASE, MITOCHONDRIAL;RARS;RARS2
5380	PORTHOMCL5380[AjBfCgCiDrGgLvMmOjOlPsSpXl|(14 genes, 13 taxa)]:	-0.549505	-0.563912	-0.518901	-0.586569	-0.59348	-0.683353	-0.694857	0.793776	0.228118	-0.0193189	-0.729779	-0.58262	DARS	DARS	DARS	DARS.S;DARS	DARS	DARS	ASPARTATE--TRNA LIGASE, CYTOPLASMIC, TRANSCRIPT VARIANT X1	DARS	SYDC_BOVIN;DARS	PUTATIVE ASPARTATE--TRNA LIGASE, CYTOPLASMIC-LIKE;HYPOTHETICAL PROTEIN;DARS	SYDC_MOUSE;DARS	ASPARTATE--TRNA LIGASE, CYTOPLASMIC;DARS
4239	PORTHOMCL4239[CgCiDrGgLvMmOjOlPsSpXl|(16 genes, 11 taxa)]:	-0.36467	-0.770066	-0.591099	-0.747279	-0.859559	-0.162529	-0.592429	0	-0.297971	-0.741153	-0.517965	-0.582534	PRKDC	PRKDC	PRKDC	PRKDC.L;PRKDC	PRKDC	PRKDC	DNA-DEPENDENT PROTEIN KINASE CATALYTIC SUBUNIT;LOC100185020		PRKDC_CHICK		PRKDC_XENLA;PRKDC_CANLF	DNA-DEPENDENT PROTEIN KINASE CATALYTIC SUBUNIT;DNA-DEPENDENT PROTEIN KINASE CATALYTIC SUBUNIT-LIKE
7110	PORTHOMCL7110[AjBfCgCiDrGgLvMmOlPsXl|(12 genes, 11 taxa)]:	-0.0518901	-0.634566	-0.627528	-0.740986	-0.63974	-0.79392	0.097137	-0.305699	0	0.342298	0	-0.581438	GSX2	GSX2	GSX2	GSX2.L	GSX2	GSX2	GSX			PARAHOX TRANSCRIPTION FACTOR GSX	GSX1_HUMAN
4622	PORTHOMCL4622[AjBfCgCiDrGgLvMmOjOlPsSpXl|(15 genes, 13 taxa)]:	-0.471923	-0.408352	-0.43533	-0.844951	-0.511716	-0.813102	-0.770442	-0.801585	-0.865735	-0.516698	-0.485172	-0.580896	MRPL45	MRPL45	MRPL45	MRPL45.L;MRPL45	MRPL45	MRPL45	39S RIBOSOMAL PROTEIN L45, MITOCHONDRIAL-LIKE	MRPL45	RM45_XENLA;MRPL45	PUTATIVE 39S RIBOSOMAL PROTEIN L45, MITOCHONDRIAL;MRPL45	RM45_XENLA;RM45_XENTR;RM45_MOUSE;MRPL45	39S RIBOSOMAL PROTEIN L45, MITOCHONDRIAL;MRPL45
4445	PORTHOMCL4445[AjCgCiDrGgLvMmOjOlPsSpXl|(15 genes, 12 taxa)]:	-0.432582	-0.392308	-0.525604	-0.706765	-0.803284	-0.624559	-0.261169	0	-0.421441	-0.579298	-0.718382	-0.58085	EIF3I	EIF3I	EIF3I	EIF3I.L;EIF3I.S;EIF3I	EIF3I	EIF3I	EUKARYOTIC TRANSLATION INITIATION FACTOR 3 SUBUNIT I-LIKE, TRANSCRIPT VARIANT X2; EUKARYOTIC TRANSLATION INITIATION FACTOR 3 SUBUNIT I-LIKE, TRANSCRIPT VARIANT X1;EIF3I		EIF3I_TAEGU;EIF3I	PUTATIVE EUKARYOTIC TRANSLATION INITIATION FACTOR 3 SUBUNIT I;EIF3I	EIF3I_TAEGU;EIF3I	EUKARYOTIC TRANSLATION INITIATION FACTOR 3 SUBUNIT I;EUKARYOTIC TRANSLATION INITIATION FACTOR 3 SUBUNIT I-LIKE;EIF3I
8106	PORTHOMCL8106[BfCiDrGgMmOlPsXl|(11 genes, 8 taxa)]:	-0.452582	-0.72633	-0.485824	-0.569877	-0.550833	-0.695412	-0.882208	-0.679727	0	0	0	-0.580143	LARP4	LARP4	LARP4	LARP4.S;LARP4.L;LARP4	LARP4AA	LARP4AA;LARP4AB	UNCHARACTERIZED LOC100185505
2723	PORTHOMCL2723[AjBfCgCiDrGgMmOjOlPsSpXl|(19 genes, 12 taxa)]:	-0.539231	-0.949714	-0.452802	-0.701912	-0.655637	-0.178471	-0.754208	-0.781712	0.430471	0	-0.33701	-0.579628	STRADA	STRADA;STRADB	STRADA;STRADB	STRADA.L;STRADB.L;STRADA.S;STRADA;STRADB	STRADA;STRADB	STRADA;STRADB	STE20-RELATED KINASE ADAPTER PROTEIN ALPHA, TRANSCRIPT VARIANT X2; STE20-RELATED KINASE ADAPTER PROTEIN ALPHA, TRANSCRIPT VARIANT X1;STRADA		STRAA_CHICK;STRADA	PUTATIVE STE20-RELATED KINASE ADAPTER PROTEIN ALPHA ISOFORM X1;STRADA		STE20-RELATED KINASE ADAPTER PROTEIN ALPHA, TRANSCRIPT VARIANT X2; STE20-RELATED KINASE ADAPTER PROTEIN ALPHA, TRANSCRIPT VARIANT X1
7294	PORTHOMCL7294[AjBfCgDrGgLvMmOlPsSpXl|(12 genes, 11 taxa)]:	-0.458516	-0.644967	-0.483132	-0.821103	-0.805245	-0.257382	0	0.536853	0	-0.490671	-0.120833	-0.578391	POMP	POMP	POMP	POMP.L;POMP.S;POMP	POMP	POMP				PUTATIVE PROTEASOME MATURATION PROTEIN;POMP	UBN2_HUMAN	PROTEASOME MATURATION PROTEIN;POMP
4810	PORTHOMCL4810[AjBfCgCiDrGgLvMmOjOlPsSpXl|(15 genes, 13 taxa)]:	-0.581374	-0.579341	-0.548516	-0.851225	-0.584902	-0.324206	-0.415312	-0.15485	-0.852353	-0.522312	-0.648284	-0.578261	PSMD6	PSMD6	PSMD6	PSMD6.L;PSMD6	PSMD6	PSMD6	26S PROTEASOME NON-ATPASE REGULATORY SUBUNIT 6;PSMD6	PSMD6	PSMD6_HUMAN;GDAP1_HUMAN;PSMD6	PUTATIVE 26S PROTEASOME NON-ATPASE REGULATORY SUBUNIT 6;PSMD6	PSMD6_HUMAN;PSMD6	26S PROTEASOME NON-ATPASE REGULATORY SUBUNIT 6;PSMD6
3566	PORTHOMCL3566[AjBfCgCiDrGgLvMmOjOlPsSpXl|(17 genes, 13 taxa)]:	-0.337253	-0.534154	-0.699396	-0.657549	-0.65174	-0.589294	-0.529675	-0.389371	-0.779235	-0.481837	-0.148407	-0.578231	NUBP1	NUBP1	NUBP1	NUBP1.S;NUBP1.L;NUBP1	NUBP1	NUBP1	CYTOSOLIC FE-S CLUSTER ASSEMBLY FACTOR NUBP1 HOMOLOG		NUP1A_XENLA;NUBP1	PUTATIVE CYTOSOLIC FE-S CLUSTER ASSEMBLY FACTOR NUBP1-B ISOFORM X1;NUBP1	NUP1B_XENLA;NUBP1	CYTOSOLIC FE-S CLUSTER ASSEMBLY FACTOR NUBP1-B, TRANSCRIPT VARIANT X2; CYTOSOLIC FE-S CLUSTER ASSEMBLY FACTOR NUBP1-B, TRANSCRIPT VARIANT X1;CYTOSOLIC FE-S CLUSTER ASSEMBLY FACTOR NUBP2 HOMOLOG;NUBP1;NBP35
1942	PORTHOMCL1942[AjDrGgLvMmOjOlPsSpXl|(22 genes, 10 taxa)]:	-0.051857	-0.271799	-0.834615	-0.815211	-0.647006	-0.848593	0	0	0.576075	0.347328	0.333333	-0.57818	POU3F2;POU3F3	POU3F4	POU3F3;POU3F2	POU3F2.L;LOC108708413	POU3F2B;POU3F3B;POU3F2A;POU3F3A	POU3F2B;POU3F3A;POU3F2A;POU3F3B;POU3F1			PO3F2_DANRE	PUTATIVE POU DOMAIN, CLASS 3, TRANSCRIPTION FACTOR 4	P3F2B_XENLA;POU3F4	BRAIN 1/2/4
11339	PORTHOMCL11339[BfDrGgMmOlPsXl|(7 genes, 7 taxa)]:	-0.163352	-0.80633	-0.812253	-0.123127	-0.721002	-0.837912	0	0.339371	0	0	0	-0.577329	CTC1	CTC1	CTC1	CTC1		CTC1
1306	PORTHOMCL1306[AjBfCgDrGgLvMmOjOlPsSpXl|(26 genes, 12 taxa)]:	-0.696813	-0.576396	-0.403736	-0.276922	-0.703211	-0.805206	0	-0.29779	0.687694	0.728916	-0.496691	-0.577047		TUBA3E	TUBA1A;TUBA3B;TUBA3A;TUBAL3	LOC108701830	TUBA8L3 (1 OF MANY);TUBULIN ALPHA CHAIN	SI:CH211-114N24.6;TUBA8L			TBA1_PARLI;TBA3_RAT	PUTATIVE TUBULIN ALPHA-1C CHAIN-LIKE ISOFORM X2	TBA1_PARLI;TBA8_CHICK;TUBA1C	TUBULIN ALPHA-1 CHAIN-LIKE, TRANSCRIPT VARIANT X1; TUBULIN ALPHA-1 CHAIN-LIKE, TRANSCRIPT VARIANT X2;TUBULIN ALPHA-1 CHAIN, TRANSCRIPT VARIANT X2; TUBULIN ALPHA-1 CHAIN, TRANSCRIPT VARIANT X3; TUBULIN ALPHA-1 CHAIN, TRANSCRIPT VARIANT X4; TUBULIN ALPHA-1 CHAIN, TRANSCRIPT VARIANT X1; TUBULIN ALPHA-1 CHAIN, TRANSCRIPT VARIANT X5;TUBULIN ALPHA-1 CHAIN, TRANSCRIPT VARIANT X1; TUBULIN ALPHA-1 CHAIN, …
5495	PORTHOMCL5495[AjBfCiDrGgLvMmOjOlPsSpXl|(14 genes, 12 taxa)]:	-0.409945	-0.718989	-0.548956	-0.404191	-0.563137	-0.816853	-0.895104	-0.820669	-0.130941	0	0.0303922	-0.577012	EIF2B1	EIF2B1	EIF2B1	EIF2B1.L;LOC108705574;EIF2B1	EIF2B1	EIF2B1	TRANSLATION INITIATION FACTOR EIF-2B SUBUNIT ALPHA-LIKE;EIF2B1	EIF2B1	EI2BA_BOVIN;EIF2B1	PUTATIVE TRANSLATION INITIATION FACTOR EIF-2B SUBUNIT ALPHA;EIF2B1	EI2BA_BOVIN	TRANSLATION INITIATION FACTOR EIF-2B SUBUNIT ALPHA;EIF2B1
4377	PORTHOMCL4377[AjBfCgCiDrGgLvMmOjOlPsSpXl|(15 genes, 13 taxa)]:	-0.417527	-0.581319	-0.523297	-0.884167	-0.675931	-0.378353	-0.0345844	0.425245	-0.494853	0.0447059	0.0658088	-0.576766	PSMA3	PSMA3	PSMA3	PSMA3.L;MGC68557;PSMA3	PSMA3	PSMA3	PROTEASOME SUBUNIT ALPHA TYPE-3-LIKE;PSMA3	PSMA3	PSA3_BOVIN;PSMA3	PUTATIVE PROTEASOME SUBUNIT ALPHA TYPE-3;HYPOTHETICAL PROTEIN;PSMA3	PSA3_BOVIN	PROTEASOME SUBUNIT ALPHA TYPE-3;PSMA3
8815	PORTHOMCL8815[DrGgMmOlPsSpXl|(10 genes, 7 taxa)]:	-0.576044	-0.683727	-0.475549	-0.298469	-0.699154	-0.724857	0	0	0	0	0.437123	-0.5763	PAX-2;PAX2	PAX5	PAX8	PAX8.L	PAIRED BOX PROTEIN PAX-7-LIKE;PAX8;PAX2;PAX7	PAX8;PAX2A;PAX2						PAIRED BOX PROTEIN PAX-2A;PAX8
5736	PORTHOMCL5736[AjBfCgCiDrGgLvMmOjOlPsSpXl|(14 genes, 13 taxa)]:	-0.445714	-0.731341	-0.539396	-0.768064	-0.599706	-0.363088	-0.720597	-0.64731	0.360441	-0.177977	-0.227206	-0.574551	PDIA6	PDIA6	PDIA6	PDIA6.L;PDIA6	PDIA6	PDIA6	PROTEIN DISULFIDE-ISOMERASE A6-LIKE;PDIA6	PDIA6	PDIA6_HUMAN	HYPOTHETICAL PROTEIN;PDIA6	PDIA6_RAT;PDIA6	PROBABLE PROTEIN DISULFIDE-ISOMERASE A6;PDIA6
1901	PORTHOMCL1901[AjBfCgCiDrGgLvMmOjOlPsSpXl|(22 genes, 13 taxa)]:	-0.310989	-0.744264	-0.530769	-0.438725	-0.842157	-0.578147	0.155792	0.0904196	-0.464235	-0.714675	-0.653799	-0.574175	CANX;CLGN	CANX;CLGN	CANX;CLGN	CANX.S;CANX	CANX;CLGN	CANX;CLGN;SI:CH211-274F20.2	CALNEXIN, TRANSCRIPT VARIANT X1; CALNEXIN, TRANSCRIPT VARIANT X3; CALNEXIN, TRANSCRIPT VARIANT X2;CANX	CANX	CALX_RAT	PUTATIVE CALNEXIN;HYPOTHETICAL PROTEIN	CALX_PONAB;CALX_CANLF;CANX	CALNEXIN-LIKE;CANX
6478	PORTHOMCL6478[AjBfCgCiDrGgMmOjOlPsSpXl|(13 genes, 12 taxa)]:	-0.467363	-0.92989	-0.466374	-0.0658578	-0.855858	-0.65525	-0.854974	-0.336058	-0.571794	0	0.239608	-0.573432	WDPCP	WDPCP	WDPCP	WDPCP.L;WDPCP	WDPCP	WDPCP	WD REPEAT-CONTAINING AND PLANAR CELL POLARITY EFFECTOR PROTEIN FRITZ HOMOLOG	WDPCP	FRITZ_HUMAN;WDPCP	HYPOTHETICAL PROTEIN;WDPCP		WD REPEAT-CONTAINING AND PLANAR CELL POLARITY EFFECTOR PROTEIN FRITZ HOMOLOG;WDPCP
5723	PORTHOMCL5723[AjBfCgCiDrGgLvMmOlPsSpXl|(14 genes, 12 taxa)]:	-0.44044	-0.739736	-0.629451	-0.84101	-0.711029	-0.0762941	-0.794636	-0.365944	0	-0.862931	-0.721892	-0.572993	FANCD2	FANCD2	FANCD2	FANCD2.L;FANCD2	FANCD2	FANCD2	FANCONI ANEMIA GROUP D2 PROTEIN	FANCD2		PUTATIVE FANCONI ANEMIA GROUP D2 PROTEIN-LIKE;FANCD2	FACD2_HUMAN;FANCD2	FANCONI ANEMIA GROUP D2 PROTEIN
6085	PORTHOMCL6085[AjBfCgCiDrGgLvMmOlPsSpXl|(13 genes, 12 taxa)]:	-0.512033	-0.864527	-0.537582	-0.805662	-0.168529	-0.546265	0.506364	-0.464763	0	-0.572466	-0.607843	-0.572433	BCCIP	BCCIP	BCCIP	BCCIP.L;BCCIP.S	BCCIP	BCCIP	PROTEIN BCCIP HOMOLOG, TRANSCRIPT VARIANT X1; PROTEIN BCCIP HOMOLOG, TRANSCRIPT VARIANT X2			PUTATIVE BRCA2 AND CDKN1A-INTERACTING PROTEIN	BCCIP_HUMAN	BRCA2 AND CDKN1A-INTERACTING PROTEIN
8779	PORTHOMCL8779[AjBfDrGgMmOjOlPsSpXl|(10 genes, 10 taxa)]:	-0.189451	-0.760132	-0.957363	-0.72201	-0.0340686	-0.76276	0	0.342378	0.851941	0	-0.322181	-0.570964	ZNF410	ZNF410	ZFP410;ZNF410	ZNF410.L;ZNF410	ZNF410	ZNF410			ZN410_BOVIN	HYPOTHETICAL PROTEIN		UNCHARACTERIZED LOC587121, TRANSCRIPT VARIANT X2; UNCHARACTERIZED LOC587121, TRANSCRIPT VARIANT X1; UNCHARACTERIZED LOC587121, TRANSCRIPT VARIANT X3
11232	PORTHOMCL11232[DrGgMmOlPsXl|(7 genes, 6 taxa)]:	-0.0315544	-0.55461	-0.773681	-0.784492	-0.577757	-0.700275	0	0	0	0	0	-0.570395	EN1	Q2L6S1_PELSI;EN1	EN1	EN1.S;EN1.L;EN1	EN1	ENG1B;EN1
3962	PORTHOMCL3962[AjBfCgDrGgLvMmOjOlPsSpXl|(16 genes, 12 taxa)]:	-0.209505	-0.72444	-0.541538	-0.857059	-0.673775	-0.414912	0	-0.266444	-0.209588	-0.00449948	-0.178309	-0.570205	PSMB3	PSMB3	PSMB3;GM4950	PSMB3.S;PSMB3.L;PSMB3	PSMB3	PSMB3		PSMB3	PSB3_ONCMY;PSMB3	PROTEASOME SUBUNIT BETA TYPE 3;PSMB3	PSB3_MOUSE	PROTEASOME SUBUNIT BETA TYPE-3;PROTEASOME SUBUNIT BETA TYPE-3-LIKE
4625	PORTHOMCL4625[BfCgCiDrGgMmOlPsXl|(15 genes, 9 taxa)]:	-0.233097	-0.414559	-0.772253	-0.657152	-0.45922	-0.878784	0.738309	-0.760226	0	0	0	-0.569178	HOXC10;HOXD10	HOXC10;HOXD10	HOXD10;HOXC10	HOXD10.S;HOXC10.L;HOXD10	HOXD9	HOXB10A;HOXD10A	HOX10 PROTEIN
2784	PORTHOMCL2784[AjBfCgCiDrGgLvMmOjOlPsSpXl|(18 genes, 13 taxa)]:	-0.246648	-0.618637	-0.350659	-0.871152	-0.35652	-0.968941	0.317571	-0.574685	0.511706	-0.0483591	-0.33799	-0.56876	RPN2	RPN2	RPN2	RPN2.S;RPN2.L;RPN2	RPN2	RPN2	DOLICHYL-DIPHOSPHOOLIGOSACCHARIDE--PROTEIN GLYCOSYLTRANSFERASE SUBUNIT 2-LIKE	RPN2	RPN2_PONAB	PUTATIVE DOLICHYL-DIPHOSPHOOLIGOSACCHARIDE--PROTEIN GLYCOSYLTRANSFERASE SUBUNIT 2 ISOFORM X1;PUTATIVE DOLICHYL-DIPHOSPHOOLIGOSACCHARIDE--PROTEIN GLYCOSYLTRANSFERASE SUBUNIT 2 ISOFORM X3	RPN2_PONAB;RPN2	DOLICHYL-DIPHOSPHOOLIGOSACCHARIDE--PROTEIN GLYCOSYLTRANSFERASE SUBUNIT 2, TRANSCRIPT VARIANT X1; DOLICHYL-DIPHOSPHOOLIGOSACCHARIDE--PROTEIN GLYCOSYLTRANSFERASE SUBUNIT 2, TRANSCRIPT VARIANT X2; DOLICHYL-DIPHOSPHOOLIGOSACCHARIDE--PROTEIN GLYCOSYLTRANSFERASE SUBUNIT 2, TRANSCRIPT VARIANT X3; DOLICHYL-DIPHOSPHOOLIGOSACCHARIDE--PROTEIN GLYCOSYLTRANSFERASE SUBUNIT 2, TRANSCRIPT VARIANT X4
2390	PORTHOMCL2390[AjBfCgCiDrGgLvMmOjOlPsSpXl|(20 genes, 13 taxa)]:	-0.442473	-0.671209	-0.765934	-0.171471	-0.618824	-0.735088	-0.750351	0.460839	-0.420029	0.00220846	0.161152	-0.5675	DLG5	DLG5	DLG5;SPEER2	LOC108703988;DLG5	DLG5A	DLG5B.1;DLG5A	DISKS LARGE HOMOLOG 5-LIKE, TRANSCRIPT VARIANT X1; DISKS LARGE HOMOLOG 5-LIKE, TRANSCRIPT VARIANT X3; DISKS LARGE HOMOLOG 5-LIKE, TRANSCRIPT VARIANT X2; DISKS LARGE HOMOLOG 5-LIKE, TRANSCRIPT VARIANT X4;LOC100185197		DLG5_HUMAN	PUTATIVE DISKS LARGE-LIKE 5	DLG5_HUMAN	DISKS LARGE HOMOLOG 5
2941	PORTHOMCL2941[AjBfCgCiDrGgLvMmOjOlPsSpXl|(18 genes, 13 taxa)]:	-0.294396	-0.71156	-0.415824	-0.841471	-0.547977	-0.591971	-0.696416	-0.724336	-0.762412	-0.864045	-0.729412	-0.5672	MARS2	MARS2	MARS2	MARS2.L;MARS2	MARS2	MARS2	METHIONINE--TRNA LIGASE, MITOCHONDRIAL-LIKE;MARS2	MARS2	SYMM_TAKRU;SYMC_XENLA;SYMM_HUMAN	HYPOTHETICAL PROTEIN;MARS2	SYMM_TAKRU;MARS2	METHIONINE--TRNA LIGASE, MITOCHONDRIAL
7609	PORTHOMCL7609[BfCgCiDrGgLvMmOjOlPsSpXl|(12 genes, 12 taxa)]:	-0.0622527	-0.747824	-0.706429	-0.693309	-0.499265	-0.691735	-0.802649	-0.892985	0.153559	0.307905	-0.428401	-0.566802	DPH7	WDR85;DPH7	DPH7	DPH7.L;DPH7	DPH7	DPH7	DIPHTHINE METHYLTRANSFERASE-LIKE;DPH7	DPH7	DPH7_MOUSE;DPH7		MPP7_MOUSE	DIPHTHINE METHYLTRANSFERASE-LIKE
1115	PORTHOMCL1115[AjBfCgCiDrGgLvMmOjOlPsSpXl|(28 genes, 13 taxa)]:	-0.77511	-0.828044	-0.638956	-0.18174	-0.399338	-0.575882	0.709221	0.00804196	0.581147	-0.462724	-0.173897	-0.566512	IGF2BP2;IGF2BP1;IGF2BP3	IGF2BP3;IGF2BP1;IGF2BP2	IGF2BP2;IGF2BP3;IGF2BP1	IGF2BP3.S;IGF2BP3.L;IGF2BP3	IGF2BP1;IGF2BP3;IGF2BP2B;IGF2BP2	IGF2BP1;IGF2BP2A;IGF2BP2B;IGF2BP3;IGF2BP2	INSULIN-LIKE GROWTH FACTOR 2 MRNA-BINDING PROTEIN 1;IGF2BP2		IF2B1_DANRE;IGF2BP3	PUTATIVE INSULIN-LIKE GROWTH FACTOR 2 MRNA-BINDING PROTEIN 1 ISOFORM X2;PUTATIVE INSULIN-LIKE GROWTH FACTOR 2 MRNA-BINDING PROTEIN 1 ISOFORM X3	IF2B1_DANRE	INSULIN-LIKE GROWTH FACTOR 2 MRNA-BINDING PROTEIN 1, TRANSCRIPT VARIANT X3; INSULIN-LIKE GROWTH FACTOR 2 MRNA-BINDING PROTEIN 1, TRANSCRIPT VARIANT X2; INSULIN-LIKE GROWTH FACTOR 2 MRNA-BINDING PROTEIN 1, TRANSCRIPT VARIANT X1;IGF2BP2
7505	PORTHOMCL7505[AjCgCiDrGgLvMmOjOlPsSpXl|(12 genes, 12 taxa)]:	-0.650659	-0.837758	-0.565	-0.444583	-0.150515	-0.750382	-0.526182	0	0.169412	-0.70805	-0.577451	-0.566483	NEMF	NEMF	NEMF	NEMF.L;NEMF	NEMF	CABZ01092170.1	NUCLEAR EXPORT MEDIATOR FACTOR NEMF, TRANSCRIPT VARIANT X5; NUCLEAR EXPORT MEDIATOR FACTOR NEMF, TRANSCRIPT VARIANT X4; NUCLEAR EXPORT MEDIATOR FACTOR NEMF, TRANSCRIPT VARIANT X3; NUCLEAR EXPORT MEDIATOR FACTOR NEMF, TRANSCRIPT VARIANT X2; NUCLEAR EXPORT MEDIATOR FACTOR NEMF, TRANSCRIPT VARIANT X6; NUCLEAR EXPORT MEDIATOR FACTOR NEMF, TRANSCRIPT VARIANT X1		NEMF_MOUSE;NEMF	PUTATIVE NUCLEAR EXPORT MEDIATOR FACTOR NEMF;NEMF	NEMF_MOUSE	NUCLEAR EXPORT MEDIATOR FACTOR NEMF
3487	PORTHOMCL3487[AjBfCgCiDrGgLvMmOjOlPsSpXl|(17 genes, 13 taxa)]:	-0.538352	-0.790286	-0.592143	-0.568015	-0.158897	-0.748952	-0.908481	-0.566627	0.668618	-0.699732	-0.104289	-0.566107	CCDC85C	CCDC85C	CCDC85C	CCDC85C.S;CCDC85C	CCDC85CB;CCDC85C	CCDC85CA;CCDC85CB;CCDC85C	COILED-COIL DOMAIN-CONTAINING PROTEIN 85C;CCDC85C		CC85C_XENTR	PUTATIVE COILED-COIL DOMAIN-CONTAINING PROTEIN	C85CA_DANRE	COILED-COIL DOMAIN-CONTAINING PROTEIN 85C, TRANSCRIPT VARIANT X2; COILED-COIL DOMAIN-CONTAINING PROTEIN 85C, TRANSCRIPT VARIANT X1; COILED-COIL DOMAIN-CONTAINING PROTEIN 85C, TRANSCRIPT VARIANT X3; COILED-COIL DOMAIN-CONTAINING PROTEIN 85C, TRANSCRIPT VARIANT X4
4601	PORTHOMCL4601[AjBfCgCiDrGgLvMmOjOlPsSpXl|(15 genes, 13 taxa)]:	-0.377967	-0.673934	-0.548352	-0.845368	-0.619706	-0.323235	-0.338851	0.108671	0.0117941	0.346481	-0.366789	-0.56476	CPSMB7;PSMB7	PSMB7	PSMB7	PSMB7.S;LOC108698232;PSMB7	PSMB7	PSMB7	PROTEASOME Z SUBUNIT; PROTEASOME Z SUBUNIT, TRANSCRIPT VARIANT X1;PSMB7	PSMB7	PSB7_RAT;PSMB7	PUTATIVE PROTEASOME SUBUNIT BETA TYPE-7;PSMB7	PSB7_PIG;PSB7_BOVIN;PSMB7	PROTEASOME SUBUNIT BETA TYPE-7;PSMB7
10521	PORTHOMCL10521[DrGgMmOlPsXl|(8 genes, 6 taxa)]:	-0.38956	-0.658022	-0.689341	-0.816838	-0.0804948	-0.751555	0	0	0	0	0	-0.564302	HEY2	HEY2	HEY2	HEY2.L;HEY1.S;HEY2	HEYL	HEYL;HEY2
2415	PORTHOMCL2415[AjBfCgCiDrGgLvMmOlPsSpXl|(20 genes, 12 taxa)]:	-0.52544	-0.515868	-0.58522	-0.25843	-0.83826	-0.662392	0.131462	-0.566548	0	0.519068	0.161864	-0.564268	MSX2;MSX1	Q6I6L9_PELSI;Q5R2I7_PELSI;MSX2;MSX1	MSX1;MSX2	MSX2.L;MSX1.S;MSX2	MSX1A;HOMEOBOX PROTEIN MSH-D;HOMEOBOX PROTEIN MSX-2;MSX1	MSX2A;MSX1A;MSX2B;MSX1	MSXB HOMEOPROTEIN	MSX1		HOMEODOMAIN PROTEIN MSX	MSX2_RAT	HOMEODOMAIN PROTEIN
12334	PORTHOMCL12334[DrGgMmOlPsXl|(6 genes, 6 taxa)]:	-0.387802	-0.397934	-0.874341	-0.566242	-0.321449	-0.836759	0	0	0	0	0	-0.564088	PITX2	PITX2	PITX2	PITX2.S;PITX2	PITX2	PITX2
2620	PORTHOMCL2620[BfCgCiDrGgLvMmOlPsSpXl|(19 genes, 11 taxa)]:	-0.0607692	-0.787473	-0.888462	-0.12027	-0.806863	-0.72021	0.830694	0.175804	0	0.39773	-0.166176	-0.564008	LFNG;MFNG	LFNG;Q2L6P9_PELSI;MFNG	LFNG;MFNG	LFNG.S;LFNG.L;LFNG	LFNG;MFNG	LFNG;MFNG	FRINGE;FRINGE, TRANSCRIPT VARIANT X2; FRINGE, TRANSCRIPT VARIANT X1; FRINGE, TRANSCRIPT VARIANT X3; FRINGE;MFNG				FNG_DROME	BETA-1,3-N-ACETYLGLUCOSAMINYLTRANSFERASE RADICAL FRINGE, TRANSCRIPT VARIANT X3; BETA-1,3-N-ACETYLGLUCOSAMINYLTRANSFERASE RADICAL FRINGE, TRANSCRIPT VARIANT X1
3761	PORTHOMCL3761[AjBfCgCiDrGgLvMmOjOlPsSpXl|(16 genes, 13 taxa)]:	-0.700275	-0.800264	-0.55	-0.0136029	-0.807451	-0.511824	0.231338	-0.494196	0.0940294	-0.118596	-0.141544	-0.563903	PSMA2	PSMA2	PSMA2	PSMA2.L;PSMA2.S;PSMA2	PSMA2	PSMA2;SI:RP71-45K5.4	PROTEASOME SUBUNIT ALPHA TYPE-2-LIKE;PSMA2		PSA2_RAT;PSMA2	PUTATIVE PROTEASOME SUBUNIT ALPHA TYPE-2-LIKE;PSMA2	STRP1_DANRE;STRIP1	PROTEASOME SUBUNIT ALPHA TYPE-2;PROTEASOME SUBUNIT ALPHA TYPE-2-LIKE;PSMA2
2529	PORTHOMCL2529[AjBfCgCiDrGgLvMmOjOlPsSpXl|(19 genes, 13 taxa)]:	-0.464505	-0.607692	-0.559286	-0.857255	-0.72951	-0.161618	-0.522883	0.254615	-0.595765	-0.063323	-0.360172	-0.563311	DRG2	DRG2	DRG2	DRG2.S;DRG2	DRG2	DRG2	DEVELOPMENTALLY-REGULATED GTP-BINDING PROTEIN 2-LIKE	DRG2	DRG2	PUTATIVE DEVELOPMENTALLY-REGULATED GTP-BINDING PROTEIN 2 ISOFORM X3;HYPOTHETICAL PROTEIN;PUTATIVE DEVELOPMENTALLY-REGULATED GTP-BINDING PROTEIN 1-LIKE ISOFORM X2;DRG1	DRG2_HUMAN	DEVELOPMENTALLY-REGULATED GTP-BINDING PROTEIN 2, TRANSCRIPT VARIANT X2; DEVELOPMENTALLY-REGULATED GTP-BINDING PROTEIN 2, TRANSCRIPT VARIANT X3; DEVELOPMENTALLY-REGULATED GTP-BINDING PROTEIN 2, TRANSCRIPT VARIANT X1;UNCHARACTERIZED LOC583054;DRG2
8133	PORTHOMCL8133[AjCgDrGgMmOlPsSpXl|(11 genes, 9 taxa)]:	-0.534011	-0.917846	-0.812253	-0.0784314	-0.657279	-0.378176	0	0	0	0	-0.569608	-0.563	SKA2	SKA2	SKA2	SKA2.S;SKA2.L;SKA2	SPINDLE AND KINETOCHORE ASSOCIATED COMPLEX SUBUNIT 2;SKA2	SKA2				PUTATIVE SPINDLE AND KINETOCHORE-ASSOCIATED PROTEIN 2;HYPOTHETICAL PROTEIN		SPINDLE AND KINETOCHORE-ASSOCIATED PROTEIN 2
6964	PORTHOMCL6964[BfCgDrGgLvMmOjOlPsSpXl|(13 genes, 11 taxa)]:	-0.20489	-0.556308	-0.850165	-0.725735	-0.186789	-0.850529	0	-0.498214	-0.824824	-0.545531	-0.0689951	-0.562403	BAZ2B	BAZ2B	BAZ2B	BAZ2B.S;BAZ2B	BAZ2BA;BAZ2B (1 OF MANY)	BAZ2BA;BAZ2B (1 OF MANY);BAZ2B		BAZ2B	BAZ2B_HUMAN		BAZ2B_HUMAN	BROMODOMAIN ADJACENT TO ZINC FINGER DOMAIN PROTEIN 2B, TRANSCRIPT VARIANT X1; BROMODOMAIN ADJACENT TO ZINC FINGER DOMAIN PROTEIN 2B, TRANSCRIPT VARIANT X9; BROMODOMAIN ADJACENT TO ZINC FINGER DOMAIN PROTEIN 2B, TRANSCRIPT VARIANT X2; BROMODOMAIN ADJACENT TO ZINC FINGER DOMAIN PROTEIN 2B, TRANSCRIPT VARIANT X8; BROMODOMAIN ADJACENT TO ZINC FINGER DOMAIN PROTEIN 2B, TRANSCRIPT VARIANT X7; BROMODOMA…
2690	PORTHOMCL2690[AjCgCiDrGgMmOjOlPsSpXl|(19 genes, 11 taxa)]:	-0.538242	-0.510637	-0.358352	-0.767512	-0.458834	-0.736729	0.381995	0	0.742444	0	-0.0136094	-0.561718	NPR3	NPR3	NPR3	NPR3.L;LOC108707320;NPR3	NPR3	NPR3	ATRIAL NATRIURETIC PEPTIDE RECEPTOR 3-LIKE		ANPRC_MOUSE	MEMBRANE GUANYLYL CYCLASE;PUTATIVE ATRIAL NATRIURETIC PEPTIDE RECEPTOR 1-LIKE		ATRIAL NATRIURETIC PEPTIDE RECEPTOR 1-LIKE;NPR1
3999	PORTHOMCL3999[AjBfCgCiDrGgLvMmOjOlPsSpXl|(16 genes, 13 taxa)]:	-0.522253	-0.718857	-0.660769	-0.484206	-0.160098	-0.81619	0.360792	0.0189782	-0.298412	-0.552054	-0.134804	-0.560396	CCDC40	CCDC40	CCDC40	CCDC40.S;CCDC40	CCDC40	CCDC40	COILED-COIL DOMAIN-CONTAINING PROTEIN 40;CCDC40	CCDC40	CCD40_HUMAN;CCDC40	PUTATIVE COILED-COIL DOMAIN-CONTAINING PROTEIN;HYPOTHETICAL PROTEIN;CCDC40	CCD40_HUMAN;CCDC40	COILED-COIL DOMAIN-CONTAINING PROTEIN 40;CCDC40
3421	PORTHOMCL3421[AjBfCgCiDrGgLvMmOjOlPsSpXl|(17 genes, 13 taxa)]:	-0.453462	-0.692176	-0.561648	-0.680784	-0.570343	-0.402735	-0.754091	-0.814579	0.621824	-0.533168	-0.15625	-0.560191	EIF3A	EIF3A	EIF3A	EIF3A;EIF3A.L	EIF3S10;EIF3A	EIF3S10;EIF3A	EUKARYOTIC TRANSLATION INITIATION FACTOR 3 SUBUNIT A;EIF3A	EIF3A	EIF3A_DANRE	PUTATIVE EUKARYOTIC TRANSLATION INITIATION FACTOR 3 SUBUNIT A;EIF3A	EIF3A_DANRE;EIF3A	EUKARYOTIC TRANSLATION INITIATION FACTOR 3 SUBUNIT A;EIF3A
2605	PORTHOMCL2605[AjBfCgCiDrGgLvMmOjOlPsSpXl|(19 genes, 13 taxa)]:	-0.354615	-0.642462	-0.471319	-0.848775	-0.127672	-0.914912	-0.89874	0.0348252	-0.834441	-0.589329	-0.560417	-0.559959	EIF2B3	EIF2B3	EIF2B3	EIF2B3.L;EIF2B3	EIF2B3	EIF2B3	TRANSLATION INITIATION FACTOR EIF-2B SUBUNIT GAMMA-LIKE;EIF2B3	EIF2B3	EI2BG_RAT;EI2BG_BOVIN;LOC106174057	HYPOTHETICAL PROTEIN;PUTATIVE TRANSLATION INITIATION FACTOR EIF-2B SUBUNIT GAMMA	EI2BG_RAT;EIF2B3	TRANSLATION INITIATION FACTOR EIF-2B SUBUNIT GAMMA;EIF2B3
6302	PORTHOMCL6302[AjBfCgCiDrGgMmOjOlPsSpXl|(13 genes, 12 taxa)]:	-0.139011	-0.745978	-0.83989	-0.768971	-0.170907	-0.692912	-0.79687	0.663497	-0.742824	0	-0.19951	-0.559611	SDHAF3	ACN9;SDHAF3	SDHAF3	SDHAF3.S;SDHAF3	SDHAF3	SDHAF3	SUCCINATE DEHYDROGENASE ASSEMBLY FACTOR 3, MITOCHONDRIAL-LIKE		SDHF3_DANRE	HYPOTHETICAL PROTEIN;SUCCINATE DEHYDROGENASE ASSEMBLY FACTOR 3, MITOCHONDRIAL		SUCCINATE DEHYDROGENASE ASSEMBLY FACTOR 3, MITOCHONDRIAL;ACN9
3831	PORTHOMCL3831[AjBfCgCiDrGgLvMmOjOlPsSpXl|(16 genes, 13 taxa)]:	-0.725989	-0.380703	-0.76522	-0.539166	-0.719681	-0.226765	-0.760532	-0.340559	-0.537029	-0.583839	0.172794	-0.559587	TBCE	TBCE	TBCE	TBCE.L;TBCE	TBCE	TBCE	TUBULIN-SPECIFIC CHAPERONE E-LIKE, TRANSCRIPT VARIANT X1; TUBULIN-SPECIFIC CHAPERONE E-LIKE, TRANSCRIPT VARIANT X2	TBCE	TBCE_RAT;TBCE	PUTATIVE TUBULIN-SPECIFIC CHAPERONE E;TBCE	TBCE_XENLA	TUBULIN-SPECIFIC CHAPERONE E;TUBULIN-SPECIFIC CHAPERONE E-LIKE;TBCE
9479	PORTHOMCL9479[AjDrGgMmOjOlPsXl|(9 genes, 8 taxa)]:	-0.642857	-0.73433	-0.606593	-0.138186	-0.806985	-0.426971	0	0	-0.426794	0	0	-0.55932	PCNP	PCNP	PCNP	PCNP.S;PCNP	PCNP	PCNP			PCNP_PONAB;PCNP	PUTATIVE PEST PROTEOLYTIC SIGNAL-CONTAINING NUCLEAR PROTEIN;PCNP
12734	PORTHOMCL12734[DrGgMmOlPsXl|(6 genes, 6 taxa)]:	-0.100714	-0.868923	-0.120385	-0.832829	-0.474882	-0.957668	0	0	0	0	0	-0.559233	FAM171A1	FAM171A1	FAM171A2	FAM171A2.L	FAM171A2B	FAM171A2
8179	PORTHOMCL8179[AjDrGgMmOjOlPsXl|(11 genes, 8 taxa)]:	-0.300495	-0.645846	-0.877637	-0.446316	-0.486471	-0.591671	0	0	-0.678147	0	0	-0.558072	GTF2IRD1;GTF2I	GTF2IRD1	GTF2IRD1;GTF2I	GTF2IRD1.L	GTF2IRD1;GTF2I	GTF2IRD1			GT2D1_MOUSE	PUTATIVE GENERAL TRANSCRIPTION FACTOR II-I REPEAT DOMAIN-CONTAINING PROTEIN 1;HYPOTHETICAL PROTEIN
3794	PORTHOMCL3794[AjBfCgDrGgLvMmOjOlPsSpXl|(16 genes, 12 taxa)]:	-0.431374	-0.672571	-0.51978	-0.57451	-0.372083	-0.7775	0	-0.687133	-0.458176	-0.662993	-0.0631127	-0.55797	METAP1	METAP1	METAP1	METAP1.L;METAP1.S;METAP1	METAP1	METAP1			MAP11_DANRE;METAP1	HYPOTHETICAL PROTEIN;PUTATIVE METHIONINE AMINOPEPTIDASE 1;METAP1	MAP1_CHICK;METAP1	METHIONINE AMINOPEPTIDASE 1;METAP1
6826	PORTHOMCL6826[CgCiDrGgLvMmOjOlPsSpXl|(13 genes, 11 taxa)]:	-0.058022	-0.610857	-0.516044	-0.601887	-0.62326	-0.933765	-0.704506	0	0.210176	-0.491393	-0.761765	-0.557306	SARS	SARS	SARS	LOC108709488;SARS.L;SARS	SARS	SARS	SERINE--TRNA LIGASE, CYTOPLASMIC-LIKE;SARS		SYSC_RAT;SARS		TBAT_ONCMY;SYS_HELPJ	SERINE--TRNA LIGASE, CYTOPLASMIC;SARS
4884	PORTHOMCL4884[AjBfCgCiDrGgLvMmOjOlPsSpXl|(15 genes, 13 taxa)]:	-0.337253	-0.80022	-0.805	-0.722304	-0.255	-0.422	-0.625182	-0.413667	-0.0332353	-0.158163	-0.585172	-0.556963	ELP4	ELP4	ELP4	ELP4.S;ELP4	ELP4	ELP4	PUTATIVE ELONGATOR COMPLEX PROTEIN 4, TRANSCRIPT VARIANT X2; PUTATIVE ELONGATOR COMPLEX PROTEIN 4, TRANSCRIPT VARIANT X1; PUTATIVE ELONGATOR COMPLEX PROTEIN 4, TRANSCRIPT VARIANT X3	ELP4	ELP4_XENLA;ELP4	PUTATIVE ELONGATOR COMPLEX PROTEIN 4-LIKE;ELP4	ELP4_BOVIN	ELONGATOR COMPLEX PROTEIN 4-LIKE;ELONGATOR COMPLEX PROTEIN 4;ELP4
6689	PORTHOMCL6689[AjBfCgDrGgLvMmOjOlPsSpXl|(13 genes, 12 taxa)]:	-0.62966	-0.335588	-0.632833	-0.0842497	-0.809433	-0.84893	0	-0.756661	0.371218	-0.439166	-0.418516	-0.556782	WNT1	WNT1	WNT1	WNT1.L;LOC108709815	WNT1	WNT1			WNT1_AMBME	HYPOTHETICAL PROTEIN	WNT1_STRPU	WNT-1 PROTEIN
7415	PORTHOMCL7415[AjBfCgCiDrGgLvMmOlPsSpXl|(12 genes, 12 taxa)]:	-0.541923	-0.892571	-0.246868	-0.658873	-0.759265	-0.233588	-0.888896	0.501399	0	-0.608933	0.0490196	-0.555515	MRPS35	MRPS35	MRPS35	MRPS35.L;MRPS35	MRPS35	MRPS35	28S RIBOSOMAL PROTEIN S35, MITOCHONDRIAL-LIKE	MRPS35		PUTATIVE 28S RIBOSOMAL PROTEIN S35, MITOCHONDRIAL ISOFORM X3;MRPS35	RT35_DANRE	28S RIBOSOMAL PROTEIN S35, MITOCHONDRIAL, TRANSCRIPT VARIANT X3; 28S RIBOSOMAL PROTEIN S35, MITOCHONDRIAL, TRANSCRIPT VARIANT X2; 28S RIBOSOMAL PROTEIN S35, MITOCHONDRIAL, TRANSCRIPT VARIANT X1;MRPS35
6323	PORTHOMCL6323[AjBfCgCiDrGgLvMmOjOlPsSpXl|(13 genes, 13 taxa)]:	-0.32033	-0.769407	-0.559396	-0.289608	-0.711961	-0.680853	-0.847169	-0.193306	0.717618	0.172776	0.267034	-0.555259	NUDCD2	NUDCD2	NUDCD2	NUDCD2.L;NUDCD2	NUDCD2	NUDCD2	NUDC DOMAIN-CONTAINING PROTEIN 2-LIKE	NUDCD2	NUDC2_RAT	PUTATIVE NUDC DOMAIN-CONTAINING PROTEIN 2 ISOFORM X1;NUDCD2	NUDC2_RAT	NUDC DOMAIN-CONTAINING PROTEIN 2, TRANSCRIPT VARIANT X2; NUDC DOMAIN-CONTAINING PROTEIN 2, TRANSCRIPT VARIANT X1;NUDCD2
7484	PORTHOMCL7484[AjBfCgCiDrGgMmOjOlPsSpXl|(12 genes, 12 taxa)]:	-0.41044	-0.744352	-0.521923	-0.75125	-0.632157	-0.271235	-0.544636	0.485885	-0.264118	0	0.437132	-0.555226	PUS10	PUS10	PUS10	PUS10.S;PUS10	PUS10	PUS10	PUTATIVE TRNA PSEUDOURIDINE SYNTHASE PUS10;PUS10		PUS10_MOUSE;PUS10	PUTATIVE TRNA PSEUDOURIDINE SYNTHASE PUS10;PUS10		PUTATIVE TRNA PSEUDOURIDINE SYNTHASE PUS10
1812	PORTHOMCL1812[AjBfCgCiDrGgLvMmOjOlPsSpXl|(22 genes, 13 taxa)]:	-0.363187	-0.778725	-0.758187	-0.464706	-0.509387	-0.456529	-0.59374	-0.0537063	-0.772059	0.183901	0.307108	-0.55512	MTG2	GTPBP5;MTG2	MTG2	LOC108718576;MTG2.L;MTG2	MTG2	MEP1B (1 OF MANY);MTG2;MEP1B	MITOCHONDRIAL RIBOSOME-ASSOCIATED GTPASE 2-LIKE;MTG2	MTG2	MTG2_PONAB;MTG2	HYPOTHETICAL PROTEIN;PUTATIVE ZINC METALLOPROTEINASE NAS-13-LIKE;PUTATIVE MITOCHONDRIAL RIBOSOME-ASSOCIATED GTPASE 2;MTG2	MTG2_PONAB;MTG2	ZINC METALLOPROTEINASE NAS-13, TRANSCRIPT VARIANT X1; ZINC METALLOPROTEINASE NAS-13, TRANSCRIPT VARIANT X2;MITOCHONDRIAL RIBOSOME-ASSOCIATED GTPASE 2;MTG2
5287	PORTHOMCL5287[AjBfCgCiDrGgLvMmOjOlPsSpXl|(14 genes, 13 taxa)]:	-0.645604	-0.924484	-0.63467	-0.319926	-0.756789	-0.0488235	-0.538532	-0.0715594	-0.324206	-0.714303	-0.243015	-0.55505	MAPKAP1	MAPKAP1	MAPKAP1	MAPKAP1.L;MAPKAP1	MAPKAP1	MAPKAP1	TARGET OF RAPAMYCIN COMPLEX 2 SUBUNIT MAPKAP1-LIKE	MAPKAP1	SIN1_CHICK;MAPKAP1	PUTATIVE TARGET OF RAPAMYCIN COMPLEX 2 SUBUNIT MAPKAP1;MAPKAP1	SIN1_XENTR;SIN1_RAT;MAPKAP1	TARGET OF RAPAMYCIN COMPLEX 2 SUBUNIT MAPKAP1, TRANSCRIPT VARIANT X1; TARGET OF RAPAMYCIN COMPLEX 2 SUBUNIT MAPKAP1, TRANSCRIPT VARIANT X2;MAPKAP1
2407	PORTHOMCL2407[AjBfCgCiDrGgLvMmOjOlPsSpXl|(20 genes, 13 taxa)]:	-0.264505	-0.843429	-0.387802	-0.161276	-0.85318	-0.808558	-0.354675	-0.152168	0.390176	-0.582779	-0.00661765	-0.553125	PLEKHH1;PLEKHH2	PLEKHH1;PLEKHH2	PLEKHH1	PLEKHH2.S;PLEKHH2	PLEKHH1	PLEKHH1	PLECKSTRIN HOMOLOGY DOMAIN-CONTAINING FAMILY H MEMBER 2		PKHH2_HUMAN	PUTATIVE PLECKSTRIN-LIKEY DOMAIN-CONTAINING FAMILY H MEMBER 1;PUTATIVE PLECKSTRIN-LIKEY DOMAIN-CONTAINING FAMILY H MEMBER 1 ISOFORM X2	PKHH1_MOUSE	PLECKSTRIN HOMOLOGY DOMAIN-CONTAINING FAMILY H MEMBER 1
4015	PORTHOMCL4015[AjBfCgCiDrGgLvMmOjOlPsSpXl|(16 genes, 13 taxa)]:	-0.731319	-0.632835	-0.220275	-0.882892	-0.0460784	-0.803618	0.0894545	-0.0101667	-0.608706	0.112487	-0.720711	-0.552836	AK2	AK2	AK2	AK2.L;AK2.S;AK2	AK2	AK2	ADENYLATE KINASE 2, MITOCHONDRIAL, TRANSCRIPT VARIANT X4; ADENYLATE KINASE 2, MITOCHONDRIAL, TRANSCRIPT VARIANT X2; ADENYLATE KINASE 2, MITOCHONDRIAL, TRANSCRIPT VARIANT X1; ADENYLATE KINASE 2, MITOCHONDRIAL, TRANSCRIPT VARIANT X5; ADENYLATE KINASE 2, MITOCHONDRIAL, TRANSCRIPT VARIANT X6; ADENYLATE KINASE 2, MITOCHONDRIAL, TRANSCRIPT VARIANT X3; ADENYLATE KINASE 2, MITOCHONDRIAL, TRANSCRIPT VARIA…	AK2	KAD2_MOUSE;AK2	PUTATIVE ADENYLATE KINASE 2, MITOCHONDRIAL ISOFORM X2;AK2	KAD2_DANRE;ADK2	ADENYLATE KINASE 2, MITOCHONDRIAL-LIKE, TRANSCRIPT VARIANT X1; ADENYLATE KINASE 2, MITOCHONDRIAL-LIKE, TRANSCRIPT VARIANT X2; ADENYLATE KINASE 2, MITOCHONDRIAL-LIKE, TRANSCRIPT VARIANT X3;ADENYLATE KINASE 2, MITOCHONDRIAL-LIKE, TRANSCRIPT VARIANT X1; ADENYLATE KINASE 2, MITOCHONDRIAL-LIKE, TRANSCRIPT VARIANT X2; ADENYLATE KINASE 2, MITOCHONDRIAL-LIKE;ADK2;AK2
3924	PORTHOMCL3924[AjBfCgCiDrGgLvMmOjOlPsSpXl|(16 genes, 13 taxa)]:	-0.246648	-0.868352	-0.522088	-0.685098	-0.235515	-0.749859	-0.771896	-0.644081	0.530294	-0.180784	0.0291667	-0.55126	VPS8	VPS8	VPS8	LOC108701859;VPS8	VPS8	VPS8	VACUOLAR PROTEIN SORTING-ASSOCIATED PROTEIN 8 HOMOLOG;VPS8	VPS8	VPS8_MOUSE;VPS8	PUTATIVE VACUOLAR PROTEIN SORTING-ASSOCIATED PROTEIN 8-LIKE;VPS8	VPS8_MOUSE;VPS8	VACUOLAR PROTEIN SORTING-ASSOCIATED PROTEIN 8 HOMOLOG;VPS8
291	PORTHOMCL291[AjBfCgCiDrGgLvMmOjOlPsSpXl|(59 genes, 13 taxa)]:	-0.162802	-0.480044	-0.821264	-0.236407	-0.806913	-0.797673	-0.845013	0.457483	0.173559	-0.158204	0.117892	-0.550851	DLL4;DLL1	DLL4;DLL1	DLL1;DLL4;DLL3	DLC.L;DLL1.L;LOC108699846;LOC108717842	DLL4;DLB;DELTA-LIKE PROTEIN 4;DELTA LIKE CANONICAL NOTCH LIGAND 1;DLA;DLC	DLC;DLA;DLD;CABZ01041002.1;DLB;DLL4	DELTA PROTEIN;FIBROPELLIN-3-LIKE;DELTA-LIKE PROTEIN 1;PROTEIN JAGGED-2-LIKE;DELTA-LIKE PROTEIN C;DLL1		CUE_AEDAE;DLL1_RAT;FBP3_STRPU;FAT3_MOUSE	PUTATIVE MUCIN-19 ISOFORM X10;DELTA PROTEIN;HYPOTHETICAL PROTEIN;DELTA	NOTC3_MOUSE	DELTA PROTEIN;FIBROPELLIN-3-LIKE;FIBROPELLIN-3
5598	PORTHOMCL5598[AjBfCgCiDrGgLvMmOjOlPsSpXl|(14 genes, 13 taxa)]:	-0.334505	-0.452088	-0.420659	-0.690417	-0.877255	-0.526676	0.358312	-0.28035	0.742971	-0.680764	-0.294363	-0.550267	PSMD9	PSMD9	PSMD9	PSMD9.S;PSMD9.L;PSMD9	PSMD9	PSMD9	26S PROTEASOME NON-ATPASE REGULATORY SUBUNIT 9-LIKE;PSMD9	PSMD9	PSMD9_BOVIN;PSMD9	PUTATIVE 26S PROTEASOME NON-ATPASE REGULATORY SUBUNIT 9	PSMD9_RAT;PSMD9	26S PROTEASOME NON-ATPASE REGULATORY SUBUNIT 9;PSMD9
9939	PORTHOMCL9939[BfCiDrGgMmOlPsXl|(8 genes, 8 taxa)]:	-0.216319	-0.224088	-0.471154	-0.86951	-0.584044	-0.932029	-0.825039	-0.170682	0	0	0	-0.549524	MRPL10	MRPL10	MRPL10	MRPL10.S;MRPL10	MRPL10	MRPL10	UNCHARACTERIZED LOC100178933
5393	PORTHOMCL5393[AjBfCgCiDrGgLvMmOjOlPsSpXl|(14 genes, 13 taxa)]:	-0.501078	-0.61833	-0.551648	-0.790368	-0.474412	-0.361235	-0.42613	0.307413	-0.900824	-0.538993	-0.652941	-0.549512		GINS4	GINS4	GINS4.L;GINS4	GINS4	GINS4	DNA REPLICATION COMPLEX GINS PROTEIN SLD5-LIKE, TRANSCRIPT VARIANT X1; DNA REPLICATION COMPLEX GINS PROTEIN SLD5-LIKE, TRANSCRIPT VARIANT X2;GINS4		SLD5_RAT;GINS4	PUTATIVE DNA REPLICATION COMPLEX GINS PROTEIN SLD5;GINS4	SLD5_MOUSE;GINS4	DNA REPLICATION COMPLEX GINS PROTEIN SLD5;GINS4
3203	PORTHOMCL3203[AjBfCgCiDrGgLvMmOjOlPsSpXl|(17 genes, 13 taxa)]:	-0.252747	-0.944176	-0.447527	-0.823456	-0.622328	-0.205529	-0.0881429	0.896224	-0.738588	-0.9013	-0.58799	-0.549294	C5ORF22	C5ORF22	6030458C11RIK	C5ORF22.L	ZGC:56556	ZGC:56556	UPF0489 PROTEIN C5ORF22 HOMOLOG		CE022_DANRE	PUTATIVE UPF0489 PROTEIN C5ORF22-LIKE;HYPOTHETICAL PROTEIN	CE022_MOUSE	UPF0489 PROTEIN C5ORF22 HOMOLOG
4320	PORTHOMCL4320[AjBfCgCiDrGgLvMmOjOlPsSpXl|(15 genes, 13 taxa)]:	-0.119945	-0.306637	-0.494341	-0.653088	-0.81549	-0.901118	0.852584	-0.759371	0.866647	0.706233	0.317647	-0.548437	RPL14	RPL14	RPL14	RPL14.S;RPL14.L;RPL14	RPL14	RPL14	60S RIBOSOMAL PROTEIN L14-LIKE;RPL14	RPL14	RL14_PIG;RPL14	PUTATIVE 60S RIBOSOMAL PROTEIN L14-LIKE ISOFORM X2	RL14_MOUSE;RPL-14	60S RIBOSOMAL PROTEIN L14-LIKE, TRANSCRIPT VARIANT X2; 60S RIBOSOMAL PROTEIN L14-LIKE, TRANSCRIPT VARIANT X1;60S RIBOSOMAL PROTEIN L14-LIKE;RPL14
3206	PORTHOMCL3206[AjBfCgCiDrGgLvMmOjOlPsSpXl|(17 genes, 13 taxa)]:	-0.157747	-0.524484	-0.511923	-0.832279	-0.716985	-0.544912	0.230935	-0.832744	-0.774324	-0.550568	-0.513358	-0.548055		FAM136A	FAM136A;FAM136B-PS	FAM136A.S;LOC108711540	FAM136A	FAM136A	PROTEIN FAM136A, TRANSCRIPT VARIANT X2; PROTEIN FAM136A, TRANSCRIPT VARIANT X3; PROTEIN FAM136A, TRANSCRIPT VARIANT X1		F136A_DANRE	HYPOTHETICAL PROTEIN	F136A_XENLA	PROTEIN FAM136A;PROTEIN FAM136A-LIKE
148	PORTHOMCL148[AjBfCgCiDrGgLvMmOjOlPsSpXl|(86 genes, 13 taxa)]:	-0.471868	-0.526725	-0.546264	-0.877132	-0.604314	-0.260588	0.0409221	-0.66351	-0.282706	0.0510836	-0.584069	-0.547815	HSPA8;HSPA2;HSPA5	E2JFA5_PELSI;HSPA5;HSPA8	HSPA8;HSPA2;HSPA1L;HSPA1A;HSPA1B;HSPA5	HSPA2.L;HSPA5.S;HSPA5;HSPA1A.L;HSPA1A.S;HSPA2;HSP70	HSC70;HSP70-5;HSPA2;HSPA5;HSP70	HSPA8;HSPA8 (1 OF MANY);HSC70;HSP70.3;HSP70.1;HSP70L;HSP70.2;SI:CH211-199O1.2;HSPA5;HSP70	HEAT SHOCK COGNATE 71 KDA PROTEIN, TRANSCRIPT VARIANT X1; HEAT SHOCK COGNATE 71 KDA PROTEIN, TRANSCRIPT VARIANT X2;78 KDA GLUCOSE-REGULATED PROTEIN-LIKE;HEAT SHOCK PROTEIN 70, TRANSCRIPT VARIANT X1; HEAT SHOCK PROTEIN 70;HSPA5	HSPA5	GRP75_BOVIN	HEAT SHOCK COGNATE 70;HEAT SHOCK PROTEIN 70;PUTATIVE HEAT SHOCK PROTEIN 70;HYPOTHETICAL PROTEIN;PUTATIVE 78 KDA GLUCOSE-REGULATED PROTEIN-LIKE;HEAT-SHOCK PROTEIN 70;HSPA2;HSP70;HSPA5	HSP7C_PONAB;HSP74_PARLI;GRP78_CHICK;HSPA5	HEAT SHOCK COGNATE 71 KDA PROTEIN;HEAT SHOCK 70 KDA PROTEIN IV-LIKE;78 KDA GLUCOSE-REGULATED PROTEIN;HEAT SHOCK 70 KDA PROTEIN-LIKE;HSPA5
9664	PORTHOMCL9664[BfDrGgMmOjOlPsXl|(9 genes, 8 taxa)]:	-0.402912	-0.449582	-0.508527	-0.439926	-0.778429	-0.705736	0	-0.165951	0.843958	0	0	-0.547519	HAPLN3	HAPLN3	HAPLN3	HAPLN3.L;LOC446245;HAPLN3	HAPLN3	HAPLN3			CSPG2_RAT
4497	PORTHOMCL4497[AjBfCgCiDrGgLvMmOjOlPsSpXl|(15 genes, 13 taxa)]:	-0.589835	-0.564923	-0.553242	-0.464583	-0.462451	-0.637706	-0.747831	0.166368	-0.923735	-0.874902	-0.628186	-0.545457	NUP85	NUP85	NUP85	NUP85.L;NUP85	NUP85	NUP85	NUCLEAR PORE COMPLEX PROTEIN NUP85-LIKE;NUP85	NUP85	NUP85_DANRE;NUP85	PUTATIVE NUCLEAR PORE COMPLEX PROTEIN;NUP85	NUP85_DANRE	NUCLEAR PORE COMPLEX PROTEIN NUP85;NUP85
2826	PORTHOMCL2826[AjBfCgCiDrGgLvMmOjOlPsSpXl|(18 genes, 13 taxa)]:	-0.466813	-0.892571	-0.550549	-0.685147	-0.0645833	-0.610647	-0.880403	-0.406643	-0.703088	-0.809639	-0.650858	-0.545052	CDK1	CDK1	CDK1	CDK1.S;CDK1.L;CDK1	CDK1	CDK1	CYCLIN-DEPENDENT KINASE 1-LIKE;CDK1	CDK1	CDK1_CARAU;CDK1	PUTATIVE CYCLIN-DEPENDENT KINASE 8;CELL DIVISION CYCLE 2;CDK1	CDK1_RAT	CYCLIN-DEPENDENT KINASE 1;CDK1
6625	PORTHOMCL6625[AjBfCgCiDrGgMmOjOlPsSpXl|(13 genes, 12 taxa)]:	-0.402857	-0.878286	-0.427033	-0.530515	-0.441275	-0.589382	-0.762442	-0.83766	-0.859147	0	0.0942402	-0.544891	TSEN2	TSEN2	TSEN2	TSEN2.L;TSEN2	TRNA SPLICING ENDONUCLEASE SUBUNIT 2;TSEN2	TSEN2	GLYCEROL-3-PHOSPHATE PHOSPHATASE-LIKE, TRANSCRIPT VARIANT X2; GLYCEROL-3-PHOSPHATE PHOSPHATASE-LIKE, TRANSCRIPT VARIANT X1		SEN2_RAT	PUTATIVE TRNA-SPLICING ENDONUCLEASE SUBUNIT SEN2		TRNA-SPLICING ENDONUCLEASE SUBUNIT SEN2
1876	PORTHOMCL1876[AjBfCgCiDrGgLvMmOjOlPsSpXl|(22 genes, 13 taxa)]:	-0.0575824	-0.677626	-0.579396	-0.150956	-0.888652	-0.910235	-0.623091	-0.867749	0.0322353	-0.233003	-0.652941	-0.544075	TXNDC9	TXNDC9	TXNDC9	TXNDC9.L;TXNDC9	TXNDC9	TXNDC9	THIOREDOXIN DOMAIN-CONTAINING PROTEIN 9-LIKE;TXNDC9	TXNDC9	PLP1_SCHPO;TXND9_BOVIN;TXNDC9	THIOREDOXIN DOMAIN-CONTAINING PROTEIN C2F3.12C;PUTATIVE THIOREDOXIN DOMAIN-CONTAINING PROTEIN 9-LIKE;TXNDC9	PLP1_SCHPO;TXND9_MOUSE;TXNDC9	THIOREDOXIN DOMAIN-CONTAINING PROTEIN PLP1;THIOREDOXIN DOMAIN-CONTAINING PROTEIN 9;TXNDC9
5146	PORTHOMCL5146[AjBfCgCiDrGgLvMmOjOlPsSpXl|(14 genes, 13 taxa)]:	-0.364286	-0.842813	-0.129396	-0.266397	-0.690319	-0.968059	-0.143273	0.0655245	-0.828735	0.165504	-0.143015	-0.543545	MRPL23	MRPL23	MRPL23	MRPL23.S;MRPL23	MRPL23	MRPL23	39S RIBOSOMAL PROTEIN L23, MITOCHONDRIAL-LIKE, TRANSCRIPT VARIANT X2; 39S RIBOSOMAL PROTEIN L23, MITOCHONDRIAL-LIKE, TRANSCRIPT VARIANT X1		RM23_HUMAN;MRPL23	PUTATIVE 39S RIBOSOMAL PROTEIN L23, MITOCHONDRIAL-LIKE;MRPL23	RM23_ANOGA	39S RIBOSOMAL PROTEIN L23, MITOCHONDRIAL;MRPL23
10415	PORTHOMCL10415[BfDrGgMmOlPsXl|(8 genes, 7 taxa)]:	-0.77967	-0.686769	-0.813516	-0.0522757	-0.658094	-0.270441	0	-0.157223	0	0	0	-0.543461	ZBTB26	ZBTB26	ZBTB26	LOC108699514;ZBTB26	SI:CH211-236K19.4;ZINC FINGER AND BTB DOMAIN-CONTAINING PROTEIN 26-LIKE;ZBTB26	ZBTB26
2091	PORTHOMCL2091[BfCgCiDrGgMmOlPsXl|(21 genes, 9 taxa)]:	-0.206703	-0.484923	-0.513242	-0.725279	-0.621397	-0.708441	0.316416	0.152028	0	0	0	-0.543331	TSPAN18	TSPAN18	TSPAN18	TSPAN18.L;TSPAN18.S;LOC108709504;TSPAN18	TSPAN18B	TSPAN18A;TSPAN18B	TETRASPANIN-18-LIKE;TETRASPANIN-18, TRANSCRIPT VARIANT X1;CD63 ANTIGEN;TSPAN9
2101	PORTHOMCL2101[AjBfCgDrGgLvMmOlPsSpXl|(21 genes, 11 taxa)]:	-0.218187	-0.575429	-0.622692	-0.580507	-0.671103	-0.582853	0	-0.103636	0	0.170814	0	-0.541795	TRIM59	TRIM59	TRIM59	LOC108705861;TRIM59.S;TRIM59	TRIM59	TRIM59		SH3RF3		PUTATIVE TRIPARTITE MOTIF-CONTAINING PROTEIN 3-LIKE	TRI33_XENLA	TRIPARTITE MOTIF-CONTAINING PROTEIN 59-LIKE;UNCHARACTERIZED LOC105442395;TRIPARTITE MOTIF CONTAINING 13-LIKE
5266	PORTHOMCL5266[AjBfCgCiDrGgLvMmOjOlPsSpXl|(14 genes, 13 taxa)]:	-0.212253	-0.911692	-0.842253	-0.451324	-0.669926	-0.145676	-0.66761	0	-0.491324	-0.725304	-0.633333	-0.538854	FZR1	FZR1	FZR1	FZR1.L;FZR1	FZR1	FZR1A;FZR1	FIZZY-RELATED PROTEIN HOMOLOG	FZR1	FZR_MOUSE	PUTATIVE FIZZY-RELATED PROTEIN-LIKE	FZR_MOUSE;FZR1	FIZZY-RELATED PROTEIN HOMOLOG, TRANSCRIPT VARIANT X2; FIZZY-RELATED PROTEIN HOMOLOG, TRANSCRIPT VARIANT X1;FIZZY-RELATED PROTEIN HOMOLOG;FZR1
8463	PORTHOMCL8463[DrGgMmOlPsXl|(11 genes, 6 taxa)]:	-0.038669	-0.459166	-0.878187	-0.444133	-0.58276	-0.830187	0	0	0	0	0	-0.53885	OLIG2;OLIG3	OLIG3;OLIG2	OLIG3;OLIG2	OLIG3.S;LOC108707878;LOC108709229;OLIG2	OLIG2	OLIG2
6093	PORTHOMCL6093[AjBfCgCiDrGgLvMmOjOlPsSpXl|(13 genes, 13 taxa)]:	-0.287143	-0.569538	-0.542308	-0.191225	-0.898407	-0.743882	-0.703935	-0.129943	-0.908588	-0.476574	-0.310417	-0.538751	PSMD13	PSMD13	PSMD13	PSMD13.S;PSMD13	PSMD13	PSMD13	26S PROTEASOME NON-ATPASE REGULATORY SUBUNIT 13-LIKE;PSMD13	PSMD13	PSD13_CHICK;PSMD13	PUTATIVE 26S PROTEASOME NON-ATPASE REGULATORY SUBUNIT 13-LIKE;PSMD13	PSD13_CHICK	26S PROTEASOME NON-ATPASE REGULATORY SUBUNIT 13;PSMD13
7631	PORTHOMCL7631[BfCgDrGgLvMmOjOlPsXl|(12 genes, 10 taxa)]:	-0.151946	-0.808114	-0.627491	-0.440968	-0.883453	-0.319739	0	0.12014	0.373931	0.0690738	0	-0.538618	FERD3L	FERD3L	FERD3L	FERD3L.L;LOC108720103;FERD3L	FERD3L	FERD3L			FER3_DROME		ASCL3_MOUSE
2431	PORTHOMCL2431[AjBfCgCiDrGgLvMmOjOlPsSpXl|(20 genes, 13 taxa)]:	-0.480769	-0.904571	-0.618242	-0.367549	-0.542377	-0.314618	-0.524714	0.173077	-0.464912	-0.494757	-0.574755	-0.538021	HIRA		HIRA	HIRA.S;LOC100049116	HIRA	HIRA	PROTEIN HIRA-LIKE		HIRA_XENLA	HYPOTHETICAL PROTEIN	HIRA_XENLA	PROTEIN HIRA;PROTEIN HIRA-LIKE
3867	PORTHOMCL3867[AjBfCgCiDrGgLvMmOjOlPsSpXl|(16 genes, 13 taxa)]:	-0.300495	-0.958549	-0.306264	-0.582304	-0.167255	-0.910382	-0.837052	-0.91164	-0.553647	0.156739	-0.607108	-0.537541	NAA20	NAA20	NAA20	NAA20.S;NAA20	NAA20	NAA20	N-ALPHA-ACETYLTRANSFERASE 20-LIKE	NAA20	NAA20_XENLA	PUTATIVE N-ALPHA-ACETYLTRANSFERASE 20-LIKE	NAA20_XENTR;NAA20_MOUSE	N-ALPHA-ACETYLTRANSFERASE 20-LIKE;N-ALPHA-ACETYLTRANSFERASE 20;NAA20
2022	PORTHOMCL2022[AjBfCgCiDrGgLvMmOjOlPsSpXl|(21 genes, 13 taxa)]:	-0.466703	-0.62844	-0.176264	-0.651127	-0.861324	-0.440676	0.48674	0.737552	0.706206	0.673354	0.695098	-0.537422	TKT	TKT	TKT;TKTL2;TKTL1	TKT.S;TKT.L;TKTL2.L;TKT	TKTB	TKTB;TKTA;TKT	TRANSKETOLASE-LIKE		TKT_RAT;TKT_BOVIN;TKT	TRANSKETOLASE-LIKE PROTEIN 2;HYPOTHETICAL PROTEIN	TKT_RAT	TRANSKETOLASE, TRANSCRIPT VARIANT X1; TRANSKETOLASE, TRANSCRIPT VARIANT X2; TRANSKETOLASE;TRANSKETOLASE-LIKE
4174	PORTHOMCL4174[AjBfCgCiDrGgLvMmOjOlPsSpXl|(16 genes, 13 taxa)]:	-0.0598901	-0.495824	-0.550604	-0.515417	-0.727941	-0.874647	-0.672753	0.402028	-0.368853	-0.700991	-0.368627	-0.537387	SNX12	SNX12	SNX12	SNX12.L;SNX12.S;SNX12	SNX12	SNX12	UNCHARACTERIZED LOC100185888;SORTING NEXIN-12-LIKE, TRANSCRIPT VARIANT X1; SORTING NEXIN-12-LIKE, TRANSCRIPT VARIANT X3; SORTING NEXIN-12-LIKE, TRANSCRIPT VARIANT X4; SORTING NEXIN-12-LIKE, TRANSCRIPT VARIANT X2		SNX12_HUMAN	PUTATIVE SORTING NEXIN-12-LIKE	SNX12_HUMAN;SNX12	SORTING NEXIN-3
4428	PORTHOMCL4428[AjBfCgCiDrGgLvMmOjOlPsSpXl|(15 genes, 13 taxa)]:	-0.16544	-0.619648	-0.520714	-0.424265	-0.808848	-0.683706	-0.869571	0.452028	-0.423941	-0.184396	-0.532721	-0.537103	EIF3M	EIF3M	EIF3M	EIF3M.S;LOC108713808;EIF3M	EIF3M	EIF3M	EUKARYOTIC TRANSLATION INITIATION FACTOR 3 SUBUNIT M-LIKE	EIF3M	EIF3M_MOUSE;EIF3M	PUTATIVE EUKARYOTIC TRANSLATION INITIATION FACTOR 3 SUBUNIT M ISOFORM X3;EIF3M	EIF3M_DANRE	EUKARYOTIC TRANSLATION INITIATION FACTOR 3 SUBUNIT M, TRANSCRIPT VARIANT X1; EUKARYOTIC TRANSLATION INITIATION FACTOR 3 SUBUNIT M, TRANSCRIPT VARIANT X3; EUKARYOTIC TRANSLATION INITIATION FACTOR 3 SUBUNIT M, TRANSCRIPT VARIANT X2;EIF3M
2222	PORTHOMCL2222[AjBfCgCiDrGgLvMmOjOlPsSpXl|(20 genes, 13 taxa)]:	-0.468791	-0.370681	-0.494451	-0.908309	-0.805564	-0.1735	-0.657545	0.726503	0.359294	0.427348	-0.221569	-0.536883	HARS	HARS	HARS;HARS2	HARS2.L;HARS	HARS	HARS	HISTIDINE--TRNA LIGASE, CYTOPLASMIC-LIKE, TRANSCRIPT VARIANT X2; HISTIDINE--TRNA LIGASE, CYTOPLASMIC-LIKE, TRANSCRIPT VARIANT X1;HARS	HARS	SYHM_PONAB;SYHC_TAKRU	PUTATIVE HISTIDINE--TRNA LIGASE, CYTOPLASMIC-LIKE ISOFORMX1;HYPOTHETICAL PROTEIN;HARS	SYHC_MOUSE	HISTIDINE--TRNA LIGASE, CYTOPLASMIC-LIKE, TRANSCRIPT VARIANT X3; HISTIDINE--TRNA LIGASE, CYTOPLASMIC-LIKE, TRANSCRIPT VARIANT X1; HISTIDINE--TRNA LIGASE, CYTOPLASMIC-LIKE, TRANSCRIPT VARIANT X2;HISTIDINE--TRNA LIGASE, CYTOPLASMIC
8557	PORTHOMCL8557[AjBfCiDrGgMmOjOlPsXl|(10 genes, 10 taxa)]:	-0.480714	-0.799077	-0.516209	-0.620098	-0.0432598	-0.760735	-0.831416	-0.374476	0.290765	0	0	-0.536682	MRPL20	MRPL20	MRPL20	MRPL20.L;MRPL20	MRPL20	MRPL20	39S RIBOSOMAL PROTEIN L20, MITOCHONDRIAL-LIKE	MRPL20	RM20_MOUSE	PUTATIVE 39S RIBOSOMAL PROTEIN L20, MITOCHONDRIAL;RPLT
5702	PORTHOMCL5702[AjCgCiDrGgMmOjOlPsSpXl|(14 genes, 11 taxa)]:	-0.327198	-0.542549	-0.618901	-0.676422	-0.547598	-0.506853	-0.103143	0	-0.268703	0	-0.157966	-0.536587	UBR4	UBR4	UBR4	LOC108697870;UBR4	UBR4	UBR4	E3 UBIQUITIN-PROTEIN LIGASE UBR4-LIKE, TRANSCRIPT VARIANT X3; E3 UBIQUITIN-PROTEIN LIGASE UBR4-LIKE, TRANSCRIPT VARIANT X2; E3 UBIQUITIN-PROTEIN LIGASE UBR4-LIKE, TRANSCRIPT VARIANT X1;LOC100185140		UBR4_HUMAN	PUTATIVE E3 UBIQUITIN-PROTEIN LIGASE UBR4-LIK E;HYPOTHETICAL PROTEIN		E3 UBIQUITIN-PROTEIN LIGASE UBR4
10410	PORTHOMCL10410[BfDrGgMmOlPsSpXl|(8 genes, 8 taxa)]:	-0.759505	-0.892747	-0.787143	-0.373195	-0.195441	-0.208971	0	-0.271538	0	0	-0.728922	-0.536167		CASC5	KNL1	LOC108698985		CASC5						UNCHARACTERIZED LOC105445511
7270	PORTHOMCL7270[BfCgDrGgMmOjOlPsXl|(12 genes, 9 taxa)]:	-0.218736	-0.816396	-0.817088	-0.221447	-0.847497	-0.292155	0	-0.552028	0.720175	0	0	-0.535553	CRABP2	CRABP2	CRABP2	CRABP2.L;LOC108700362;CRABP2	CRABP2A;CRABP2B	CRABP2A;CRABP2B		FABP7	RABP2_HUMAN
4495	PORTHOMCL4495[AjBfCgCiDrGgLvMmOlPsSpXl|(15 genes, 12 taxa)]:	-0.363516	-0.739121	-0.534011	-0.930931	-0.119387	-0.525765	-0.644519	-0.322969	0	0.17193	-0.160784	-0.535455	PSMA5	PSMA5	PSMA5	PSMA5.L;PSMA5.S;PSMA5	PSMA5	PSMA5	PROTEASOME SUBUNIT ALPHA TYPE-5-LIKE;PSMA5	PSMA5		HYPOTHETICAL PROTEIN;PUTATIVE PROTEASOME SUBUNIT ALPHA TYPE-5;PSMA5	PSA5_MOUSE;PSMA5	PROTEASOME SUBUNIT ALPHA TYPE-5;PSMA5
4748	PORTHOMCL4748[AjBfCgCiDrGgLvMmOjOlPsSpXl|(15 genes, 13 taxa)]:	-0.702143	-0.642022	-0.539505	-0.680368	-0.445809	-0.201647	-0.689026	0.290769	-0.280971	-0.711455	-0.646324	-0.535249	FAF1	FAF1	FAF1	FAF1.S;FAF1.L;FAF1	FAF1	FAF1	FAS-ASSOCIATED FACTOR 1-LIKE;FAF1		FAF1_MOUSE	PUTATIVE FAS-ASSOCIATED FACTOR 1 ISOFORM X1	FAF1_MOUSE;FAF1	FAS-ASSOCIATED FACTOR 1, TRANSCRIPT VARIANT X1; FAS-ASSOCIATED FACTOR 1, TRANSCRIPT VARIANT X2;FAF1
2244	PORTHOMCL2244[AjBfCgCiDrGgLvMmOjOlPsSpXl|(20 genes, 13 taxa)]:	-0.40467	-0.602549	-0.562418	-0.492475	-0.825662	-0.321941	-0.0563377	0.467795	-0.599735	0.149267	-0.719118	-0.534953	CNOT11	CNOT11	CNOT11	CNOT11.L;CNOT11.S;CNOT11	CNOT11	CNOT11	CCR4-NOT TRANSCRIPTION COMPLEX SUBUNIT 11;CNOT11	CNOT11	CNO11_HUMAN;CNOT11	PUTATIVE CCR4-NOT TRANSCRIPTION COMPLEX SUBUNIT 11-LIKE;PUTATIVE CCR4-NOT TRANSCRIPTION COMPLEX SUBUNIT 11;PUTATIVE CCR4-NOT TRANSCRIPTION COMPLEX SUBUNIT 11 ISOFORM X2;CNOT11	CNO11_HUMAN;CNOT11	CCR4-NOT TRANSCRIPTION COMPLEX SUBUNIT 11;CCR4-NOT TRANSCRIPTION COMPLEX SUBUNIT 11, TRANSCRIPT VARIANT X1; CCR4-NOT TRANSCRIPTION COMPLEX SUBUNIT 11, TRANSCRIPT VARIANT X2;CNOT11
6709	PORTHOMCL6709[AjBfCiDrGgLvMmOjOlPsSpXl|(13 genes, 12 taxa)]:	-0.0162637	-0.717099	-0.832527	-0.571103	-0.554167	-0.517676	-0.824325	-0.874825	0.358706	0.241486	-0.131005	-0.534806	DYNC2LI1	DYNC2LI1	DYNC2LI1	DYNC2LI1.S;DYNC2LI1	DYNC2LI1	DYNC2LI1	CYTOPLASMIC DYNEIN 2 LIGHT INTERMEDIATE CHAIN 1-LIKE;DYNC2LI1	DYNC2LI1	DC2L1_MOUSE;DYNC2LI1	PUTATIVE CYTOPLASMIC DYNEIN 2 LIGHT INTERMEDIATE CHAIN 1-LIKE;DYNC2LI1	DC2L1_BOVIN;DYNC2LI1	CYTOPLASMIC DYNEIN 2 LIGHT INTERMEDIATE CHAIN 1-LIKE;DYNC2LI1
3308	PORTHOMCL3308[AjBfCgCiDrGgLvMmOjOlPsSpXl|(17 genes, 13 taxa)]:	-0.471593	-0.58844	-0.642033	-0.690686	-0.481863	-0.329912	-0.206506	-0.0718182	-0.771941	-0.841362	-0.124341	-0.534088	KIAA0368	KIAA0368	AI314180;KIAA0368	KIAA0368.L	ECPAS;FBXO10	SI:DKEY-245P14.7;FBXO10	PROTEASOME-ASSOCIATED PROTEIN ECM29 HOMOLOG	KIAA0368;NEU3.1	ECM29_MOUSE	PUTATIVE PROTEASOME-ASSOCIATED PROTEIN ECM29-LIKE	ECM29_MOUSE;ECM29_HUMAN	PROTEASOME-ASSOCIATED PROTEIN ECM29 HOMOLOG
3339	PORTHOMCL3339[AjBfCgCiDrGgLvMmOjOlPsSpXl|(17 genes, 13 taxa)]:	-0.515879	-0.865538	-0.671758	-0.210196	-0.216618	-0.723647	0.0291818	0	-0.380706	-0.37418	-0.587132	-0.533939	INTS7	INTS7	INTS7	INTS7.S;INTS7	INTS7	INTS7	INTEGRATOR COMPLEX SUBUNIT 7-LIKE;INTS7	INTS7	INT7_CHICK;INTS7	PUTATIVE INTEGRATOR COMPLEX SUBUNIT 7;PUTATIVE ATP-DEPENDENT RNA HELICASE CGH-1;INTS7;CGH-1	INT7_CHICK;INT7_MOUSE;INTS7	INTEGRATOR COMPLEX SUBUNIT 7;INTEGRATOR COMPLEX SUBUNIT 7-LIKE
3702	PORTHOMCL3702[AjBfCgCiDrGgLvMmOjOlPsSpXl|(16 genes, 13 taxa)]:	-0.191648	-0.573934	-0.674505	-0.479203	-0.479991	-0.801294	0.406571	-0.787302	-0.18	-0.544149	-0.036152	-0.533429		WDR96;CFAP43	CFAP43	CFAP43.L;CFAP43	CFAP43	CFAP43	CILIA- AND FLAGELLA-ASSOCIATED PROTEIN 43		CFA43_HUMAN;CFAP43	PUTATIVE WD REPEAT-CONTAINING PROTEIN 96-LIKE;WD REPEAT-CONTAINING PROTEIN C10ORF79	CFA43_HUMAN	CILIA- AND FLAGELLA-ASSOCIATED PROTEIN 43
6187	PORTHOMCL6187[AjBfCgCiDrGgLvMmOjOlPsSpXl|(13 genes, 13 taxa)]:	-0.0445055	-0.326505	-0.475659	-0.838162	-0.765809	-0.748874	-0.676532	-0.385216	-0.567735	-0.630609	-0.224877	-0.533253	MRPL24	MRPL24	MRPL24	MRPL24.L;MRPL24	MRPL24	MRPL24	39S RIBOSOMAL PROTEIN L24, MITOCHONDRIAL, TRANSCRIPT VARIANT X1; 39S RIBOSOMAL PROTEIN L24, MITOCHONDRIAL, TRANSCRIPT VARIANT X2;MRPL24	MRPL24		PUTATIVE 39S RIBOSOMAL PROTEIN L24, MITOCHONDRIAL;MRPL24	RM24_DROME	39S RIBOSOMAL PROTEIN L24, MITOCHONDRIAL
5260	PORTHOMCL5260[AjBfCgCiDrGgLvMmOlPsSpXl|(14 genes, 12 taxa)]:	-0.107582	-0.658989	-0.767582	-0.762059	-0.402647	-0.500618	-0.522169	0.310143	0	-0.534118	-0.55674	-0.533246	NAA35	NAA35	NAA35	NAA35.S	NAA35	NAA35	N-ALPHA-ACETYLTRANSFERASE 35, NATC AUXILIARY SUBUNIT-LIKE	NAA35		PUTATIVE N-ALPHA-ACETYLTRANSFERASE 35, NATC AUXILIARY SUBUNIT-LIKE;PUTATIVE N-ALPHA-ACETYLTRANSFERASE 35, NATC AUXILIARY SUBUNIT;NAA35	NAA35_MACFA;NAA35	N-ALPHA-ACETYLTRANSFERASE 35, NATC AUXILIARY SUBUNIT;NAA35
11779	PORTHOMCL11779[DrGgMmOlPsXl|(7 genes, 6 taxa)]:	-0.0902747	-0.377451	-0.808956	-0.582761	-0.613922	-0.725674	0	0	0	0	0	-0.533173	SHISA2	SHISA2	SHISA2	SHISA2.S;SHISA2.L;SHISA2	SHISA2B;SHISA2	SHISA2
3446	PORTHOMCL3446[AjBfCgCiDrGgLvMmOjOlPsSpXl|(17 genes, 13 taxa)]:	-0.360165	-0.704835	-0.528407	-0.584681	-0.222132	-0.798735	-0.726143	0.846014	0.425735	-0.253622	-0.270466	-0.533159	WARS2	WARS2	WARS2	WARS2.L;WARS2.S;WARS2	WARS2	WARS2	TRYPTOPHAN--TRNA LIGASE, MITOCHONDRIAL-LIKE	WARS2	SYWM_MOUSE	PUTATIVE TRYPTOPHAN--TRNA LIGASE, MITOCHONDRIAL;WARS2	SYWM_BOVIN;WARS2	TRYPTOPHAN--TRNA LIGASE, MITOCHONDRIAL-LIKE
6221	PORTHOMCL6221[AjBfCgCiDrGgMmOjOlPsSpXl|(13 genes, 12 taxa)]:	-0.470055	-0.745187	-0.527747	-0.179387	-0.58076	-0.688	-0.790169	0.0703497	-0.156324	0	-0.116422	-0.531856	METTL18	METTL18	METTL18	METTL18.S;METTL18	SI:DKEY-15F17.8;METTL18	METTL18	HISTIDINE PROTEIN METHYLTRANSFERASE 1 HOMOLOG		MET18_BOVIN;METTL18	PUTATIVE HISTIDINE PROTEIN METHYLTRANSFERASE 1-LIKE;LOC106165172		HISTIDINE PROTEIN METHYLTRANSFERASE 1 HOMOLOG;METTL18
9644	PORTHOMCL9644[BfDrGgMmOlPsXl|(9 genes, 7 taxa)]:	-0.117806	-0.575952	-0.783462	-0.743277	-0.244024	-0.720764	0	0.0152448	0	0	0	-0.530881	WT1	WT1	WT1	WT1.S	WT1	WT1A;WT1B;WT1		WT1
2226	PORTHOMCL2226[AjBfCgCiDrGgLvMmOjOlPsSpXl|(20 genes, 13 taxa)]:	-0.551484	-0.615473	-0.316209	-0.266225	-0.638358	-0.794618	-0.077039	0.0755245	0.576235	0.498824	0.343873	-0.530394	GDI2	GDI2	GDI1	GDI1.S;GDI2.L;GDI1.L;GDI1	GDI1;GDI2	GDI1;GDI2;ZGC:112334	RAB GDP DISSOCIATION INHIBITOR ALPHA-LIKE		GDIB_BOVIN	RAB GDP-DISSOCIATION INHIBITOR	GDIA_BOVIN;GDIB_HUMAN	RAB GDP DISSOCIATION INHIBITOR ALPHA;RAB GDP DISSOCIATION INHIBITOR BETA-LIKE
7821	PORTHOMCL7821[AjBfDrGgLvMmOlPsSpXl|(11 genes, 10 taxa)]:	-0.124392	-0.493441	-0.710557	-0.510743	-0.499301	-0.843726	0	-0.321724	0	0.725963	0.664969	-0.53036	MNX1	MNX1	MNX1	MNX1.L;MNX1.S;MNX1	MNX1	MNX1		MNX1		PUTATIVE MOTOR NEURON AND PANCREAS HOMEOBOX PROTEIN 1	MNX1_HUMAN	MOTOR NEURON AND PANCREAS HOMEOBOX PROTEIN 1;MNX1
1568	PORTHOMCL1568[AjBfCgCiDrGgLvMmOjOlPsSpXl|(24 genes, 13 taxa)]:	-0.355385	-0.500923	-0.370659	-0.768824	-0.389755	-0.791794	0.528169	-0.52	0.292471	-0.176636	-0.0485294	-0.529557	CLTC	CLTC	CLTC	CLTC.S;CLTC.L;CLTC	CLTCB;CLTCA;CLTCL1	CLTCB;CLTCA;CABZ01080009.1;CLTCL1	CLATHRIN HEAVY CHAIN 1-LIKE		CLH1_MOUSE;CLH2_HUMAN	PUTATIVE CLATHRIN HEAVY CHAIN 1	CLH_CAEEL	CLATHRIN HEAVY CHAIN 1
7195	PORTHOMCL7195[AjBfDrGgMmOlPsSpXl|(12 genes, 9 taxa)]:	-0.415275	-0.905231	-0.890879	-0.161361	-0.143771	-0.659013	0	0.312727	0	0	0.53616	-0.529255	HUNK	HUNK	HUNK	HUNK.L;LOC414675;HUNK	HUNK	HUNK;SI:CH211-197L9.5				HYPOTHETICAL PROTEIN		HORMONALLY UP-REGULATED NEU TUMOR-ASSOCIATED KINASE HOMOLOG A-LIKE
2512	PORTHOMCL2512[AjBfCgCiDrGgLvMmOjOlPsSpXl|(19 genes, 13 taxa)]:	-0.318956	-0.182505	-0.501209	-0.461667	-0.813848	-0.897118	0.880831	0.855524	0.841529	0.647451	0.332598	-0.529217	RPL6	RPL6	RPL6;RPL6L	RPL6.L;RPL6.S;RPL6	RPL6	RPL6	60S RIBOSOMAL PROTEIN L6, TRANSCRIPT VARIANT X3; 60S RIBOSOMAL PROTEIN L6, TRANSCRIPT VARIANT X4; 60S RIBOSOMAL PROTEIN L6, TRANSCRIPT VARIANT X1; 60S RIBOSOMAL PROTEIN L6, TRANSCRIPT VARIANT X2;RPL6	RPL6	RL6_CHILA;RPL6	PUTATIVE 60S RIBOSOMAL PROTEIN L6 ISOFORM X2;RPL6	RL6_CHILA	60S RIBOSOMAL PROTEIN L6, TRANSCRIPT VARIANT X1; 60S RIBOSOMAL PROTEIN L6, TRANSCRIPT VARIANT X2
8050	PORTHOMCL8050[AjBfDrGgLvMmOjOlPsSpXl|(11 genes, 11 taxa)]:	-0.206429	-0.310022	-0.192857	-0.928873	-0.630809	-0.905529	0	-0.617703	0.755088	0.526646	0.444485	-0.529086	COMMD6	COMMD6	COMMD6	LOC108708499;COMMD6	COMMD6	COMMD6			COMD6_XENTR	HYPOTHETICAL PROTEIN	COMD6_XENTR	COMM DOMAIN-CONTAINING PROTEIN 6, TRANSCRIPT VARIANT X2; COMM DOMAIN-CONTAINING PROTEIN 6, TRANSCRIPT VARIANT X1;COMMD6
5390	PORTHOMCL5390[AjBfCgCiDrGgLvMmOjOlPsSpXl|(14 genes, 13 taxa)]:	-0.198022	-0.863956	-0.665934	-0.440686	-0.718386	-0.286118	-0.438468	-0.301818	-0.164294	0.293333	-0.122059	-0.52885	GAS8	GAS8	GAS8	GAS8.S;GAS8	GROWTH ARREST-SPECIFIC PROTEIN 8	GAS8	GROWTH ARREST-SPECIFIC PROTEIN 8;GAS8	GAS8	GAS8_HUMAN	PUTATIVE GROWTH ARREST-SPECIFIC PROTEIN 8;GAS8	GAS8_HUMAN;GAS8	GROWTH ARREST-SPECIFIC PROTEIN 8;GAS8
2295	PORTHOMCL2295[AjBfCgCiDrGgLvMmOjOlPsSpXl|(20 genes, 13 taxa)]:	-0.639505	-0.877319	-0.899835	-0.184755	-0.390735	-0.179971	-0.498026	0	-0.563088	-0.841238	-0.302206	-0.528687	ASPM	ASPM	ASPM	LOC108714434	ASPM	ASPM	ABNORMAL SPINDLE-LIKE MICROCEPHALY-ASSOCIATED PROTEIN HOMOLOG;UNCHARACTERIZED LOC100187291		ASPM_AOTVO	PUTATIVE ABNORMAL SPINDLE-LIKE MICROCEPHALY-ASSOCIATED PROTEIN-LIKE ISOFORM X2;HYPOTHETICAL PROTEIN;PUTATIVE ABNORMAL SPINDLE-LIKE MICROCEPHALY-ASSOCIATED PROTEIN;PUTATIVE ABNORMAL SPINDLE-LIKE MICROCEPHALY-ASSOCIATED PROTEIN-LIKE;PUTATIVE ABNORMAL SPINDLE-LIKE MICROCEPHALY-ASSOCIATED PROTEIN-LIKE ISOFORM X1	ASPM_SHEEP	ABNORMAL SPINDLE-LIKE MICROCEPHALY-ASSOCIATED PROTEIN HOMOLOG, TRANSCRIPT VARIANT X1; ABNORMAL SPINDLE-LIKE MICROCEPHALY-ASSOCIATED PROTEIN HOMOLOG, TRANSCRIPT VARIANT X2;ABNORMAL SPINDLE-LIKE MICROCEPHALY-ASSOCIATED PROTEIN HOMOLOG
5945	PORTHOMCL5945[AjCiDrGgMmOlPsSpXl|(14 genes, 9 taxa)]:	-0.15909	-0.850901	-0.836319	-0.198333	-0.662574	-0.464176	-0.479338	0	0	0	-0.341054	-0.528565		NIPBL	NIPBL	NIPBL.S	NIPBL, COHESIN LOADING FACTOR;NIPPED-B-LIKE PROTEIN;NIPBLA	NIPBLA	NIPPED-B-LIKE PROTEIN A			PUTATIVE NIPPED-B-LIKE PROTEIN-LIKE ISOFORM X1		NIPPED-B-LIKE PROTEIN A;CELL WALL PROTEIN DAN4-LIKE;NIPPED-B-LIKE PROTEIN
4407	PORTHOMCL4407[AjBfCgCiDrGgLvMmOjOlPsSpXl|(15 genes, 13 taxa)]:	-0.0865385	-0.744923	-0.564176	-0.600564	-0.852328	-0.318088	0.485182	-0.658881	-0.172647	-0.617895	-0.625735	-0.52777		PFAS	PFAS	LOC108703280;PFAS	PFAS	PFAS	PHOSPHORIBOSYLFORMYLGLYCINAMIDINE SYNTHASE-LIKE;PFAS	PFAS	PUR4_HUMAN	HYPOTHETICAL PROTEIN;PFAS	PUR4_MOUSE	PHOSPHORIBOSYLFORMYLGLYCINAMIDINE SYNTHASE;PROBABLE PHOSPHORIBOSYLFORMYLGLYCINAMIDINE SYNTHASE, CHLOROPLASTIC/MITOCHONDRIAL;PFAS
1430	PORTHOMCL1430[AjBfCgCiDrGgLvMmOjOlPsSpXl|(25 genes, 13 taxa)]:	-0.675659	-0.366549	-0.519725	-0.74223	-0.250392	-0.6095	0.730987	-0.797301	-0.00779412	0.432962	0.386642	-0.527343	CAPZA1;CAPZA3;CAPZA2	CAPZA1;CAPZA3;CAPZA2	CAPZA2;CAPZA1;CAPZA3;4933400A11RIK	CAPZA2.L;CAPZA1.L;CAPZA2.S;CAPZA2;CAPZA1	CAPZA2;CAPZA1B	CAPZA1A;CAPZA1B	BETA-ACTININ I;CAPZA2	CAPZA2	CAPZA_DROME;CAPZA2	PUTATIVE F-ACTIN-CAPPING PROTEIN SUBUNIT ALPHA-1-LIKE;CAPZA2	CAZA1_CHICK;CAPZA2	F-ACTIN-CAPPING PROTEIN SUBUNIT ALPHA-1
1746	PORTHOMCL1746[AjCgCiDrGgLvMmOjOlPsSpXl|(23 genes, 12 taxa)]:	-0.606593	-0.947648	-0.548571	-0.22174	-0.478505	-0.360971	-0.732792	0	0.221029	-0.862064	-0.374755	-0.527338	NUP205	NUP205	NUP205	LOC108704341;NUP205.L;NUP205	NUP205	NUP205	NUCLEAR PORE COMPLEX PROTEIN NUP205-LIKE		NU205_HUMAN;NUP205	PUTATIVE NUCLEAR PORE COMPLEX PROTEIN	NU205_HUMAN;NUP205	NUCLEAR PORE COMPLEX PROTEIN NUP205;NUCLEAR PORE COMPLEX PROTEIN NUP205-LIKE
617	PORTHOMCL617[AjBfCgCiDrGgLvMmOjOlPsSpXl|(37 genes, 13 taxa)]:	-0.471044	-0.716176	-0.359121	-0.768039	-0.401838	-0.447794	0.284766	-0.730178	-0.835353	-0.0227864	0.312623	-0.527335	TLN1;TLN2	TLN2	TLN1;TLN2	TLN2.S;TLN2.L;LOC733283;TLN2;TLN1	TLN2A;TLN2B;TLN2	TLN1;TLN2A;TLN2B;CABZ01046981.1;TLN2;TLN2 (1 OF MANY)	TALIN-2, TRANSCRIPT VARIANT X2; TALIN-2, TRANSCRIPT VARIANT X1; TALIN-2, TRANSCRIPT VARIANT X3; TALIN-2, TRANSCRIPT VARIANT X4; TALIN-2, TRANSCRIPT VARIANT X5;TLN1	TLN1	TLN1_HUMAN;TLN2_HUMAN	PUTATIVE TALIN-1 ISOFORM X6;PUTATIVE TALIN-1 ISOFORM X5;PUTATIVE TALIN-1 ISOFORM X3;106064344	TLN1_CHICK;TLN1	TALIN-1, TRANSCRIPT VARIANT X4; TALIN-1, TRANSCRIPT VARIANT X3; TALIN-1, TRANSCRIPT VARIANT X1; TALIN-1, TRANSCRIPT VARIANT X2; TALIN-1, TRANSCRIPT VARIANT X5; TALIN-1, TRANSCRIPT VARIANT X6;TLN1
8045	PORTHOMCL8045[BfCgDrGgLvMmOlPsXl|(11 genes, 9 taxa)]:	-0.243736	-0.737582	-0.694451	-0.397377	-0.503015	-0.585559	0	-0.531049	0	-0.191682	0	-0.526953	LYPLA2	LYPLA2	LYPLA2	LYPLA1.S;LYPLA2.L;LYPLA2.S;LYPLA1;LYPLA2	LYPLA2	LYPLA2					XYLA_HORVU
7901	PORTHOMCL7901[AjBfCgDrGgMmOlPsSpXl|(11 genes, 10 taxa)]:	-0.30478	-0.770945	-0.357363	-0.813848	-0.87924	-0.0352353	0	-0.48014	0	0	-0.272426	-0.526902	GMFB	GMFB	GMFB;GMFG	GMFB.L;GMFB	GMFB	GMFB		GMFG		GLIA MATURATION FACTOR BETA;GMFG		GLIA MATURATION FACTOR BETA, TRANSCRIPT VARIANT X1; GLIA MATURATION FACTOR BETA, TRANSCRIPT VARIANT X2; GLIA MATURATION FACTOR BETA, TRANSCRIPT VARIANT X3;GMFG
6175	PORTHOMCL6175[AjBfCgCiDrGgMmOjOlPsSpXl|(13 genes, 12 taxa)]:	-0.416868	-0.548571	-0.551264	-0.275441	-0.665784	-0.702118	-0.763156	-0.0203497	0.455618	0	-0.736029	-0.526674	EIF2B5	EIF2B5	EIF2B5	LOC108718035;EIF2B5	EIF2B5	EIF2B5	TRANSLATION INITIATION FACTOR EIF-2B SUBUNIT EPSILON-LIKE, TRANSCRIPT VARIANT X1; TRANSLATION INITIATION FACTOR EIF-2B SUBUNIT EPSILON-LIKE, TRANSCRIPT VARIANT X2;EIF2B5	EIF2B5	EI2BE_MOUSE;EIF2B5	PUTATIVE TRANSLATION INITIATION FACTOR EIF-2B SUBUNIT EPSILON;EIF2B5		TRANSLATION INITIATION FACTOR EIF-2B SUBUNIT EPSILON;EIF2B5
6468	PORTHOMCL6468[AjBfDrGgMmOjOlPsSpXl|(13 genes, 10 taxa)]:	-0.0280769	-0.75411	-0.233846	-0.854069	-0.576422	-0.713324	0	0	0.520588	0	0.0485294	-0.526641	MRPS21	MRPS21	MRPS21	MRPS21.L;MRPS21.S;MRPS21	MRPS21	MRPS21			RT21_BOVIN;MRPS21	PUTATIVE 28S RIBOSOMAL PROTEIN S21, MITOCHONDRIAL;MRPS21		28S RIBOSOMAL PROTEIN S21, MITOCHONDRIAL;MRPS21
6825	PORTHOMCL6825[CgCiDrGgLvMmOjOlPsSpXl|(13 genes, 11 taxa)]:	-0.438719	-0.873846	-0.567967	-0.208284	-0.838382	-0.230735	0.453597	0	-0.680706	0.139546	-0.329167	-0.526322		MCM4	MCM4	MCM4.L	MCM4	MCM4	DNA REPLICATION LICENSING FACTOR MCM4;MCM4		MCM4A_XENLA;MCM4		MCM4A_XENLA;MCM4	DNA REPLICATION LICENSING FACTOR MCM4-A;MCM4
8033	PORTHOMCL8033[AjBfCgCiDrGgMmOlPsSpXl|(11 genes, 11 taxa)]:	-0.360948	-0.82044	-0.374286	-0.479069	-0.22457	-0.894712	0.717156	-0.210559	0	0	-0.0171569	-0.525671	MORN2	MORN2	MORN2	MORN2.L;MORN2	MORN2	MORN2	MORN REPEAT-CONTAINING PROTEIN 2-LIKE	MORN2		PUTATIVE MORN REPEAT-CONTAINING PROTEIN 2-LIKE		MORN REPEAT-CONTAINING PROTEIN 2, TRANSCRIPT VARIANT X2; MORN REPEAT-CONTAINING PROTEIN 2, TRANSCRIPT VARIANT X1
4731	PORTHOMCL4731[AjBfCgCiDrGgLvMmOjOlPsSpXl|(15 genes, 13 taxa)]:	-0.589231	-0.749714	-0.521593	-0.215343	-0.502868	-0.574176	-0.805286	-0.236017	-0.105235	-0.761362	-0.202819	-0.525488	EIF2B;EIF2S2	EIF2S2	EIF2S2	EIF2S2.S;EIF2S2.L;EIF2S2	EIF2S2	EIF2S2	TRANSLATION INITIATION FACTOR	EIF2S2	IF2B_MOUSE	PUTATIVE EUKARYOTIC TRANSLATION INITIATION FACTOR 2 SUBUNIT 2-LIKE;EIF2S2	IF2B_RABIT;IF2B_HUMAN	EUKARYOTIC TRANSLATION INITIATION FACTOR 2 SUBUNIT 2;EIF2S2
10137	PORTHOMCL10137[AjDrGgMmOlPsSpXl|(8 genes, 8 taxa)]:	-0.448516	-0.781758	-0.00313187	-0.845098	-0.323431	-0.750735	0	0	0	0	0.0656863	-0.525445	MRPL57	MRP63;MRPL57	MRPL57	MRPL57.S;MRPL57	MRPL57	MRPL57				HYPOTHETICAL PROTEIN		UNCHARACTERIZED LOC105442611
7704	PORTHOMCL7704[BfCgCiDrGgLvMmOjOlPsSpXl|(12 genes, 12 taxa)]:	-0.657418	-0.694769	-0.192527	-0.315858	-0.686539	-0.605	-0.652364	-0.59958	0.187324	-0.264768	-0.101103	-0.525352	DHCR7	DHCR7	DHCR7	DHCR7.S	DHCR7	DHCR7	7-DEHYDROCHOLESTEROL REDUCTASE;DHCR7	DHCR7	DHCR7_XENTR;DHCR7		DHCR7_XENTR	7-DEHYDROCHOLESTEROL REDUCTASE, TRANSCRIPT VARIANT X2; 7-DEHYDROCHOLESTEROL REDUCTASE, TRANSCRIPT VARIANT X3; 7-DEHYDROCHOLESTEROL REDUCTASE, TRANSCRIPT VARIANT X1;DHCR7
3602	PORTHOMCL3602[AjBfCgCiDrGgLvMmOjOlPsSpXl|(17 genes, 13 taxa)]:	-0.573187	-0.823516	-0.556044	-0.261544	-0.590711	-0.336324	-0.384636	-0.378574	-0.909029	-0.546398	-0.749632	-0.523554	PWP1	PWP1	PWP1	PWP1.S;PWP1	PWP1	PWP1	PERIODIC TRYPTOPHAN PROTEIN 1 HOMOLOG		PWP1_MOUSE;PWP1	HYPOTHETICAL PROTEIN;PWP1	PWP1_BOVIN;PWP1_MOUSE;PWP1	PERIODIC TRYPTOPHAN PROTEIN 1 HOMOLOG, TRANSCRIPT VARIANT X2; PERIODIC TRYPTOPHAN PROTEIN 1 HOMOLOG, TRANSCRIPT VARIANT X1;PERIODIC TRYPTOPHAN PROTEIN 1 HOMOLOG;PWP1
7164	PORTHOMCL7164[AjBfCgCiDrGgMmOjOlPsXl|(12 genes, 11 taxa)]:	-0.320165	-0.845319	-0.894066	-0.490515	-0.0295833	-0.551735	-0.901026	0.28993	-0.629	0	0	-0.521897	KLHDC2	KLHDC2	KLHDC2	KLHDC2.L;KLHDC2	KLHDC2	KLHDC2	KELCH DOMAIN-CONTAINING PROTEIN 2;KLHDC2	KLHDC2	KLDC1_HUMAN	PUTATIVE KELCH DOMAIN-CONTAINING PROTEIN 2-LIKE
11434	PORTHOMCL11434[DrGgMmOlPsXl|(7 genes, 6 taxa)]:	-0.067026	-0.37789	-0.814746	-0.652062	-0.407493	-0.811657	0	0	0	0	0	-0.521812	HOXD11	HOXD11	HOXD11	HOXD11.L;LOC108703010;HOXD11	HOXD11A	HOXD11A
1206	PORTHOMCL1206[AjBfCgCiDrGgLvMmOjOlPsSpXl|(27 genes, 13 taxa)]:	-0.108736	-0.68989	-0.705	-0.673083	-0.21375	-0.738677	0.337494	0.752448	0.511787	-0.0174819	0.378541	-0.521523	NTN1;NTN1 (1 OF MANY)	NTN1	NTN1;TBC1D24;NTN5;NTN3	LOC108701181;NTN1.L;NTN1.S;NTN1	NTN1A;NTN1B;NTN2;NTN5;NTN1 (1 OF MANY)	NTN1B;NTN1A;NTN5;NTN1 (1 OF MANY)	NETRIN, TRANSCRIPT VARIANT X1; NETRIN	NTN1 (1 OF MANY)	NET1_HUMAN;NTN1	PUTATIVE LAMININ SUBUNIT GAMMA-1;PUTATIVE NETRIN-1 ISOFORM X3	NET1_CHICK;NET1_HUMAN	NETRIN-1, TRANSCRIPT VARIANT X3; NETRIN-1, TRANSCRIPT VARIANT X2; NETRIN-1, TRANSCRIPT VARIANT X1
5507	PORTHOMCL5507[AjCgCiDrGgLvMmOjOlPsSpXl|(14 genes, 12 taxa)]:	-0.343077	-0.696615	-0.523242	-0.752966	-0.784534	-0.0277059	-0.733039	0	-0.784324	-0.442023	-0.630882	-0.521357	GPS1	GPS1	GPS1	GPS1.L;GPS1	GPS1	GPS1	COP9 SIGNALOSOME COMPLEX SUBUNIT 1;GPS1		CSN1_XENLA;GPS1	PUTATIVE COP9 SIGNALOSOME COMPLEX SUBUNIT 1	CSN1_HUMAN;CSN1_XENLA	COP9 SIGNALOSOME COMPLEX SUBUNIT 1;GPS1
2923	PORTHOMCL2923[AjBfCgCiDrGgLvMmOjOlPsXl|(18 genes, 12 taxa)]:	-0.268242	-0.636264	-0.551374	-0.783113	-0.707402	-0.1725	-0.521649	-0.113566	0.197529	-0.0594634	0	-0.519816	PDIA4	PDIA4	PDIA4	PDIA4.L;PDIA4	PDIA4	PDIA4	PROTEIN DISULFIDE-ISOMERASE A4-LIKE, TRANSCRIPT VARIANT X2; PROTEIN DISULFIDE-ISOMERASE A4-LIKE, TRANSCRIPT VARIANT X1;PDIA4	PDIA4	PDIA4_HUMAN	HYPOTHETICAL PROTEIN	PDIA4_BOVIN;PDIA4_HUMAN;PDIA4
4983	PORTHOMCL4983[AjCgCiDrGgLvMmOjOlPsSpXl|(15 genes, 12 taxa)]:	-0.223132	-0.135604	-0.479231	-0.585637	-0.797794	-0.894588	0.831273	0	0.878324	0.151558	0.225613	-0.519331	RPS13	RPS13	RPS13	RPS13.S	RPS13	RPS13	RS13 PROTEIN;RPS13		RS13_RAT;RPS13	RPS13 PROTEIN;40S RIBOSOMAL PROTEIN S13-LIKE PROTEIN;RPS13	RS13_RAT;RPS13	40S RIBOSOMAL PROTEIN S13;RPS13
8108	PORTHOMCL8108[AjBfCgDrGgLvMmOlPsSpXl|(11 genes, 11 taxa)]:	-0.169451	-0.875473	-0.729066	-0.807083	-0.441299	-0.0901765	0	-0.631189	0	-0.35548	0.390686	-0.518758	FXN	FXN	FXN	FXN.L;FXN	FXN	FXN		FXN		PUTATIVE FRATAXIN, MITOCHONDRIAL;FXN	FRDA_BOVIN;FXN	FRATAXIN, MITOCHONDRIAL;FXN
3510	PORTHOMCL3510[AjBfCgCiDrGgLvMmOjOlPsSpXl|(17 genes, 13 taxa)]:	-0.433297	-0.835473	-0.504396	-0.345735	-0.788211	-0.203765	-0.670221	0.00174825	-0.847059	0.267203	0.237033	-0.518479	XRCC6	XRCC6	XRCC6	XRCC6.L;XRCC6	XRCC6	XRCC6	X-RAY REPAIR CROSS-COMPLEMENTING PROTEIN 5, TRANSCRIPT VARIANT X3; X-RAY REPAIR CROSS-COMPLEMENTING PROTEIN 5, TRANSCRIPT VARIANT X2; X-RAY REPAIR CROSS-COMPLEMENTING PROTEIN 5, TRANSCRIPT VARIANT X1	XRCC6	XRCC6_CHICK;XRCC6	PUTATIVE X-RAY REPAIR CROSS-COMPLEMENTING PROTEIN 6;XRCC6	XRCC6_MOUSE	X-RAY REPAIR CROSS-COMPLEMENTING PROTEIN 6;X-RAY REPAIR CROSS-COMPLEMENTING PROTEIN 5-LIKE;XRCC6
5212	PORTHOMCL5212[AjBfCgCiDrGgLvMmOjOlPsSpXl|(14 genes, 13 taxa)]:	-0.556538	-0.744527	-0.758736	-0.218995	-0.43777	-0.393824	-0.635312	-0.763986	-0.702706	-0.701507	-0.337745	-0.518398	RFC2	RFC2	RFC2	RFC2.L;RFC2	RFC2	RFC2	REPLICATION FACTOR C SUBUNIT 2-LIKE, TRANSCRIPT VARIANT X1; REPLICATION FACTOR C SUBUNIT 2-LIKE, TRANSCRIPT VARIANT X2; REPLICATION FACTOR C SUBUNIT 2-LIKE, TRANSCRIPT VARIANT X3;RFC2	RFC2	RFC2_RAT;RFC2	PUTATIVE REPLICATION FACTOR C SUBUNIT 2;RFC2	RFC2_BOVIN;RFC2	REPLICATION FACTOR C SUBUNIT 2;RFC2
2303	PORTHOMCL2303[AjBfCgCiDrGgLvMmOjOlPsSpXl|(20 genes, 13 taxa)]:	-0.470385	-0.658637	-0.57022	-0.730907	-0.404314	-0.275324	-0.436416	-0.633497	0.780315	0.682155	-0.0163391	-0.518298	DDX1	DDX1	DDX1	DDX1.L;DDX1	DDX1	DDX1	ATP-DEPENDENT RNA HELICASE DDX1-LIKE;DDX1	DDX1	DDX1_CHICK;DDX1_DROME;DDX1	HYPOTHETICAL PROTEIN;PUTATIVE ATP-DEPENDENT RNA HELICASE DDX1;DDX1	DDX1_XENLA;DDX1_BOVIN	ATP-DEPENDENT RNA HELICASE DDX1
1789	PORTHOMCL1789[AjBfCgDrGgLvMmOjOlPsSpXl|(22 genes, 12 taxa)]:	-0.00104396	-0.789802	-0.931429	-0.263064	-0.415539	-0.708382	0	0.0731469	-0.293618	-0.454943	0.198093	-0.51821	ZNF423;ZNF521	ZNF423;ZNF521	ZFP423;ZFP521;ZNF423;ZNF521	ZNF423.L;ZNF521.S;LOC108719226;ZNF521	ZNF521;SI:CH211-216L23.1;ZNF423	ZNF423;ZNF521			ZN423_HUMAN	PUTATIVE ZINC FINGER PROTEIN	ZN423_HUMAN	ZINC FINGER PROTEIN 423-LIKE
7883	PORTHOMCL7883[AjBfCgDrGgMmOjOlPsSpXl|(11 genes, 11 taxa)]:	-0.459011	-0.589978	-0.50544	-0.852475	-0.388701	-0.312706	0	-0.529675	-0.693029	0	-0.545098	-0.518052	MRPL21	MRPL21	MRPL21	MRPL21.L;MRPL21	MRPL21	MRPL21		MRPL21	RM21_BOVIN;MRPL21	PUTATIVE 39S RIBOSOMAL PROTEIN L21, MITOCHONDRIAL ISOFORM X3		39S RIBOSOMAL PROTEIN L21, MITOCHONDRIAL, TRANSCRIPT VARIANT X2; 39S RIBOSOMAL PROTEIN L21, MITOCHONDRIAL, TRANSCRIPT VARIANT X1; 39S RIBOSOMAL PROTEIN L21, MITOCHONDRIAL, TRANSCRIPT VARIANT X3;MRPL21
6803	PORTHOMCL6803[AjCgCiDrGgLvMmOjOlPsSpXl|(13 genes, 12 taxa)]:	-0.382198	-0.795033	-0.332857	-0.387206	-0.527034	-0.683529	0.25213	0	-0.448324	0.4413	0.344608	-0.517976	IMMT	IMMT	IMMT	IMMT.L;IMMT.S;IMMT	IMMT	IMMT	MICOS COMPLEX SUBUNIT MIC60-LIKE		MIC60_MOUSE;IMMT	PUTATIVE MICOS COMPLEX SUBUNIT MIC60;IMMT	MIC60_MOUSE	MICOS COMPLEX SUBUNIT MIC60;IMMT
6633	PORTHOMCL6633[AjBfCgCiDrGgLvMmOlPsSpXl|(13 genes, 12 taxa)]:	-0.514231	-0.736352	-0.567363	-0.868848	-0.17875	-0.238971	-0.837234	0.280839	0	-0.43063	-0.630515	-0.517419	CARS	CARS	CARS	CARS.S;CARS	CARS	CARS	CYSTEINE--TRNA LIGASE, CYTOPLASMIC-LIKE;CARS	CARS		PUTATIVE CYSTEINE--TRNA LIGASE, CYTOPLASMIC ISOFORM X3;CARS	SYCC_MACFA	CYSTEINE--TRNA LIGASE, CYTOPLASMIC, TRANSCRIPT VARIANT X3; CYSTEINE--TRNA LIGASE, CYTOPLASMIC, TRANSCRIPT VARIANT X1; CYSTEINE--TRNA LIGASE, CYTOPLASMIC, TRANSCRIPT VARIANT X2;CARS
11079	PORTHOMCL11079[AjDrGgMmOlPsXl|(7 genes, 7 taxa)]:	-0.301044	-0.178857	-0.123187	-0.761863	-0.81549	-0.923235	0	0	0	0	0	-0.517279	RPL22L1	RPL22L1	RPL22L1	RPL22L1.L;RPL22L1	RPL22L1	RPL22L1				RIBOSOMAL PROTEIN L22E CONTAINING PROTEIN
9175	PORTHOMCL9175[BfDrGgMmOlPsXl|(9 genes, 7 taxa)]:	-0.337363	-0.855297	-0.629945	-0.435907	-0.690368	-0.1545	0	-0.224336	0	0	0	-0.51723	ANP32A	ANP32A	ANP32A	ANP32A.S;ANP32A.L;ANP32A	ANP32A	ANP32A
2998	PORTHOMCL2998[AjBfCgCiDrGgLvMmOjOlPsSpXl|(18 genes, 13 taxa)]:	-0.434615	-0.73578	-0.542637	-0.512083	-0.554828	-0.319235	-0.778169	-0.763636	-0.730382	-0.592652	-0.271446	-0.51653	GNL3	GNL3	GNL3L;GNL3	GNL3L.S;GNL3L	GNL3L;GNL3	GNL3L;GNL3	GUANINE NUCLEOTIDE-BINDING PROTEIN-LIKE 3 HOMOLOG;GNL3L	GNL3L	GNL3_CAEEL;GNL3L	PUTATIVE GUANINE NUCLEOTIDE-BINDING PROTEIN-LIKE 3-LIKE PROTEIN;NUCLEOSTEMIN-LIKE PROTEIN	GNL3_CAEEL	GUANINE NUCLEOTIDE-BINDING PROTEIN-LIKE NSN1
4705	PORTHOMCL4705[AjBfCgCiDrGgLvMmOjOlPsSpXl|(15 genes, 13 taxa)]:	-0.456319	-0.554418	-0.790824	-0.0118873	-0.492034	-0.793059	-0.361429	0.38962	-0.820382	-0.707575	-0.760907	-0.516423			ALG10B	ALG10.S;ALG10.L	ALG10	ALG10	PUTATIVE DOL-P-GLC:GLC(2)MAN(9)GLCNAC(2)-PP-DOL ALPHA-1,2-GLUCOSYLTRANSFERASE, TRANSCRIPT VARIANT X1; PUTATIVE DOL-P-GLC:GLC(2)MAN(9)GLCNAC(2)-PP-DOL ALPHA-1,2-GLUCOSYLTRANSFERASE, TRANSCRIPT VARIANT X2		AG10B_MOUSE	PUTATIVE DOL-P-GLC:GLC(2)MAN(9)GLCNAC(2)-PP-DOL ALPHA-1,2-GLUCOSYLTRANSFERASE	AG10B_MOUSE	PUTATIVE DOL-P-GLC:GLC(2)MAN(9)GLCNAC(2)-PP-DOL ALPHA-1,2-GLUCOSYLTRANSFERASE
7687	PORTHOMCL7687[BfCgDrGgLvMmOjOlPsXl|(12 genes, 10 taxa)]:	-0.448022	-0.515516	-0.515495	-0.196868	-0.615697	-0.805851	0	-0.811888	-0.245706	-0.564872	0	-0.516241	GBX2	GBX2	GBX2	GBX1.S;GBX2.1.L;LOC108701418;GBX1;GBX2	GBX2	GBX2			GBX2_XENLA		GBX2_HUMAN
5620	PORTHOMCL5620[AjBfCgCiDrGgLvMmOjOlPsSpXl|(14 genes, 13 taxa)]:	-0.445989	-0.661055	-0.0486264	-0.626103	-0.607941	-0.706029	-0.17174	-0.317972	0.465324	-0.362576	-0.0245098	-0.515957	MRPL27	MRPL27	MRPL27	LOC108701099;MRPL27	MRPL27	MRPL27	39S RIBOSOMAL PROTEIN L27, MITOCHONDRIAL-LIKE;MRPL27	MRPL27	RM27_MOUSE	PUTATIVE 39S RIBOSOMAL PROTEIN L27, MITOCHONDRIAL		39S RIBOSOMAL PROTEIN L27, MITOCHONDRIAL;MRPL27
5668	PORTHOMCL5668[AjBfCgCiDrGgLvMmOjOlPsSpXl|(14 genes, 13 taxa)]:	-0.546374	-0.767429	-0.480879	-0.517475	-0.313848	-0.469559	-0.859974	-0.900611	-0.102088	0.105346	0.15625	-0.515927	WDR91	WDR91	WDR91	WDR91.L;WDR91	WDR91	WDR91	WD REPEAT-CONTAINING PROTEIN 91	WDR91	WDR91_CHICK;WDR91	PUTATIVE WD REPEAT-CONTAINING PROTEIN 91	WDR91_CHICK	WD REPEAT-CONTAINING PROTEIN 91
2408	PORTHOMCL2408[AjBfCgDrGgLvMmOjOlPsSpXl|(20 genes, 12 taxa)]:	-0.169286	-0.604088	-0.668022	-0.383076	-0.543873	-0.726854	0	0.816364	-0.611265	-0.32672	-0.25576	-0.515866	SPG11	SPG11	SPG11	SPG11.L;SPG11		SPG11			SPTCS_MOUSE;SPTCS_HUMAN	PUTATIVE SPATACSIN;HYPOTHETICAL PROTEIN;PUTATIVE SPATACSIN ISOFORM X1	SPTCS_HUMAN;SPTCS_MOUSE	SPATACSIN
11727	PORTHOMCL11727[DrGgMmOlPsXl|(7 genes, 6 taxa)]:	-0.721005	-0.732176	-0.348056	-0.112	-0.46223	-0.71736	0	0	0	0	0	-0.515471	HOXB1	HOXB1	HOXB1	LOC108702519;HOXB1	HOXB1B	HOXB1A
3091	PORTHOMCL3091[AjBfCgCiDrGgLvMmOjOlPsSpXl|(18 genes, 13 taxa)]:	-0.183516	-0.772923	-0.738901	-0.485417	-0.063848	-0.845029	-0.727584	-0.356084	-0.406853	0.274857	-0.161642	-0.514939	NDUFAF5	NDUFAF5	NDUFAF5	NDUFAF5.L;NDUFAF5	NDUFAF5	NDUFAF5	NADH DEHYDROGENASE [UBIQUINONE] 1 ALPHA SUBCOMPLEX ASSEMBLY FACTOR 5-LIKE;NDUFAF5		NDUF5_DANRE;NDUFAF5	PUTATIVE NADH DEHYDROGENASE;NDUFAF5	NDUF5_DANRE;NDUF5_PONAB	NADH DEHYDROGENASE [UBIQUINONE] 1 ALPHA SUBCOMPLEX ASSEMBLY FACTOR 5
8759	PORTHOMCL8759[AjCgDrGgMmOlPsXl|(10 genes, 8 taxa)]:	-0.357308	-0.489802	-0.49978	-0.0658333	-0.811985	-0.861706	0	0	0	0	0	-0.514402	MRPS18C	MRPS18C	MRPS18C	MRPS18C.L;MRPS18C.S;MRPS18C	MRPS18C	MRPS18C				PUTATIVE 28S RIBOSOMAL PROTEIN S18C, MITOCHONDRIAL
2634	PORTHOMCL2634[AjBfCgCiDrGgLvMmOjOlPsSpXl|(19 genes, 13 taxa)]:	-0.025	-0.611077	-0.290165	-0.493382	-0.773064	-0.888588	0.894545	-0.162837	0.801	0.233787	0.315441	-0.513546	RPL23A	RPL23A	RPL23A;RPL23A-PS3;GM6096;GM21726	RPL23A.L;LOC108707954;RPL23A	RPL23A	RPL23A	60S RIBOSOMAL PROTEIN L23A-LIKE;RPL23A	RPL23A	RL23A_RAT	PUTATIVE 60S RIBOSOMAL PROTEIN L23A;RPL23A	RL23A_RAT	60S RIBOSOMAL PROTEIN L23A
6836	PORTHOMCL6836[BfCgCiDrGgMmOjOlPsSpXl|(13 genes, 11 taxa)]:	-0.458736	-0.870769	-0.643022	-0.673848	-0.116961	-0.3145	-0.813364	-0.440209	-0.500618	0	-0.252083	-0.512973	TTF2	TTF2	TTF2	TTF2.S;TTF2	TRANSCRIPTION TERMINATION FACTOR 2;TTF2	TTF2	TRANSCRIPTION TERMINATION FACTOR 2-LIKE	TTF2	TTF2_MOUSE;TTF2			TRANSCRIPTION TERMINATION FACTOR 2;TRANSCRIPTION TERMINATION FACTOR 2, TRANSCRIPT VARIANT X1; TRANSCRIPTION TERMINATION FACTOR 2, TRANSCRIPT VARIANT X2;TRANSCRIPTION TERMINATION FACTOR 2-LIKE;TTF2
2931	PORTHOMCL2931[AjBfCgCiDrGgLvMmOjOlPsSpXl|(18 genes, 13 taxa)]:	-0.748681	-0.699736	-0.501264	-0.226912	-0.84201	-0.0588824	-0.896857	-0.157133	-0.200294	0.541094	-0.583333	-0.512914	FEN1	FEN1	FEN1	FEN1.S;FEN1.L;LOC108696916;FEN1	FEN1;ZGC:110269	ZGC:110269;FEN1	FLAP ENDONUCLEASE 1;FEN1	FEN1	FEN1_NEMVE;FEN1	PUTATIVE FLAP ENDONUCLEASE 1-LIKE;FEN1	FEN1_XIPMA;FEN1	FLAP ENDONUCLEASE 1;FEN1
5622	PORTHOMCL5622[AjBfCgCiDrGgLvMmOjOlPsSpXl|(14 genes, 13 taxa)]:	-0.393901	-0.143736	-0.54978	-0.808554	-0.403897	-0.777147	-0.681506	-0.313566	0.124735	-0.0364706	-0.439951	-0.512836	PSMC5	PSMC5	PSMC5	PSMC5	PSMC5	PSMC5	26S PROTEASE REGULATORY SUBUNIT 8;PSMC5	PSMC5	PRS8_MANSE	PUTATIVE 26S PROTEASE REGULATORY SUBUNIT 8;PSMC5	PRS8_MANSE	26S PROTEASE REGULATORY SUBUNIT 8
3886	PORTHOMCL3886[AjBfCgCiDrGgLvMmOjOlPsSpXl|(16 genes, 13 taxa)]:	-0.500989	-0.570418	-0.551374	-0.665417	-0.546544	-0.237088	-0.706468	-0.509161	-0.922912	-0.852405	-0.413235	-0.511972	MAK16	MAK16	MAK16	MAK16.S;MAK16.L	MAK16	MAK16	PROTEIN MAK16 HOMOLOG		MAK16_HUMAN	HYPOTHETICAL PROTEIN	MAK16_BOVIN	PROTEIN MAK16 HOMOLOG
1719	PORTHOMCL1719[AjBfCgCiDrGgLvMmOjOlPsSpXl|(23 genes, 13 taxa)]:	-0.517692	-0.77978	-0.415989	-0.255809	-0.838603	-0.262559	0.236455	-0.358671	-0.694853	0.44485	-0.140564	-0.511739	UBE2V2;UBE2V1	UBE2V2	UBE2V1;UBE2V2	LOC108719244;UBE2V2.S;UBE2V1.S;UBE2V2.L;UBE2V2	UBE2V2	UBE2V2;UBE2V1	UBIQUITIN-CONJUGATING ENZYME E2 VARIANT 2-LIKE, TRANSCRIPT VARIANT X1; UBIQUITIN-CONJUGATING ENZYME E2 VARIANT 2-LIKE, TRANSCRIPT VARIANT X2;UBE2V1	UBE2V2	UB2V1_MOUSE;UBE2V2	PUTATIVE UBIQUITIN-CONJUGATING ENZYME E2 VARIANT 2-LIKE ISOFORM X2;UBE2V1	UB2V2_PONAB;UB2V2_DANRE	UBIQUITIN-CONJUGATING ENZYME E2 VARIANT 1;UBIQUITIN-CONJUGATING ENZYME E2 VARIANT 2-LIKE
6575	PORTHOMCL6575[AjBfCgCiDrGgLvMmOjOlPsSpXl|(13 genes, 13 taxa)]:	-0.271099	-0.837407	-0.54489	-0.156429	-0.504975	-0.745	-0.672442	-0.609088	0.757647	0.182577	-0.562532	-0.509967	HDHD2	HDHD2	HDHD2	HDHD2.L;HDHD2	HDHD2	HDHD2	HALOACID DEHALOGENASE-LIKE HYDROLASE DOMAIN-CONTAINING PROTEIN 2;HDHD2	HDHD2	HDHD2_RAT;HDHD2	PUTATIVE HALOACID DEHALOGENASE-LIKE HYDROLASE DOMAIN-CONTAINING PROTEIN 2;HDHD2	HDHD2_DANRE;HDHD2	HALOACID DEHALOGENASE-LIKE HYDROLASE DOMAIN-CONTAINING PROTEIN 2;HDHD2
7925	PORTHOMCL7925[AjBfCgDrGgMmOjOlPsSpXl|(11 genes, 11 taxa)]:	-0.468132	-0.924659	-0.482637	-0.624779	-0.111618	-0.447971	0	0.467617	-0.479941	0	-0.268627	-0.509966	FAAP24	C19ORF40;FAAP24	FAAP24	FAAP24.L;FAAP24	FAAP24	FAAP24			FAP24_MOUSE;FAAP24	PUTATIVE FANCONI ANEMIA-ASSOCIATED PROTEIN OF 24 KDA;FAAP24		FANCONI ANEMIA-ASSOCIATED PROTEIN OF 24 KDA;FAAP24
2905	PORTHOMCL2905[AjBfCiDrGgLvMmOjOlPsSpXl|(18 genes, 12 taxa)]:	-0.25511	-0.243893	-0.534945	-0.283021	-0.834983	-0.90678	-0.042566	0.315096	0.498414	0.654458	0.687894	-0.509789	WNT3;WNT3A	WNT3	WNT3;WNT3A	WNT3A.L;WNT3.L;WNT3	WNT3A;WNT3	WNT3;WNT3A	WINGLESS-TYPE MMTV INTEGRATION SITE FAMILY, MEMBER 3, TRANSCRIPT VARIANT X1; WINGLESS-TYPE MMTV INTEGRATION SITE FAMILY, MEMBER 3		WNT3A_CHICK	WNT3	WNT3_MOUSE	PROTO-ONCOGENE WNT-3;WNT3
932	PORTHOMCL932[AjBfCgCiDrGgLvMmOjOlPsSpXl|(30 genes, 13 taxa)]:	-0.421264	-0.688747	-0.348352	-0.691789	-0.0720588	-0.834088	-0.312649	-0.451958	0.466794	-0.673622	-0.492647	-0.509383	TXN	SMC2	TXN1;TXNDC8;TXNDC2;TXN	TXN.L;UNKNOWN.S;LOC100037235;LOC108706331	THIOREDOXIN	TXN;ZGC:56493	THIOREDOXIN-2, TRANSCRIPT VARIANT X1; THIOREDOXIN-2, TRANSCRIPT VARIANT X2;THIOREDOXIN-LIKE;THIOREDOXIN-2-LIKE;TRXA	TXN	THIO_GEOCY	PUTATIVE THIOREDOXIN-LIKE;HYPOTHETICAL PROTEIN	THIO_CHLPN;THIO_ICTPU	THIOREDOXIN;TRXA
7506	PORTHOMCL7506[AjCgCiDrGgMmOjOlPsSpXl|(12 genes, 11 taxa)]:	-0.336593	-0.81978	-0.432637	-0.540098	-0.632157	-0.289235	-0.827974	0	0.165824	0	0.0672794	-0.508417	CRCP	CRCP	CRCP	CRCP.S;CRCP	CRCP	CRCP	CALCITONIN GENE-RELATED PEPTIDE RECEPTOR COMPONENT PROTEIN;CRCP		RPC9_HUMAN;CRCP	DNA-DIRECTED RNA POLYMERASE III SUBUNIT RPC9;CRCP		DNA-DIRECTED RNA POLYMERASE III SUBUNIT RPC9;DNA-DIRECTED RNA POLYMERASE III SUBUNIT RPC9-LIKE;CRCP
4383	PORTHOMCL4383[AjBfCgDrGgLvMmOjOlPsSpXl|(15 genes, 12 taxa)]:	-0.381319	-0.836308	-0.530495	-0.291691	-0.299755	-0.709816	0	0.740699	-0.242647	-0.644995	-0.592402	-0.508231	TRMT10C	TRMT10C	TRMT10C	TRMT10C.S;TRMT10C.L;TRMT10C	TRMT10C	TRMT10C		TRMT10C	MRRP1_XENTR;TRMT10C	PUTATIVE MITOCHONDRIAL RIBONUCLEASE P PROTEIN 1-LIKE;TRMT10C	MRRP1_HUMAN;TRMT10C	MITOCHONDRIAL RIBONUCLEASE P PROTEIN 1-LIKE;TRMT10C
4658	PORTHOMCL4658[AjBfCgCiDrGgLvMmOjOlPsSpXl|(15 genes, 13 taxa)]:	-0.649341	-0.740615	-0.479231	-0.18424	-0.464828	-0.523676	-0.763831	0.192168	-0.883647	-0.780681	0.152574	-0.506989	TRNT1	TRNT1	TRNT1	TRNT1.L;TRNT1.S;TRNT1	TRNT1	TRNT1	CCA TRNA NUCLEOTIDYLTRANSFERASE 1, MITOCHONDRIAL-LIKE;TRNT1	TRNT1	TRNT1_HUMAN;TRNT1	PUTATIVE CCA TRNA NUCLEOTIDYLTRANSFERASE 1, MITOCHONDRIAL	TRNT1_MOUSE;TRNT1	CCA TRNA NUCLEOTIDYLTRANSFERASE 1, MITOCHONDRIAL, TRANSCRIPT VARIANT X2; CCA TRNA NUCLEOTIDYLTRANSFERASE 1, MITOCHONDRIAL, TRANSCRIPT VARIANT X1;CCA TRNA NUCLEOTIDYLTRANSFERASE 1, MITOCHONDRIAL;TRNT1
8371	PORTHOMCL8371[BfCiDrGgLvMmOjOlPsSpXl|(11 genes, 11 taxa)]:	-0.49544	-0.488879	-0.413352	-0.0775	-0.710809	-0.851185	-0.525195	-0.132867	0.0899706	-0.451785	-0.117034	-0.506194	MRPL51	MRPL51	MRPL51	MRPL51.L;MRPL51	MRPL51	MRPL51	39S RIBOSOMAL PROTEIN L51, MITOCHONDRIAL-LIKE		RM51_XENLA;MRPL51		RM51_DROPS;MRPL51	39S RIBOSOMAL PROTEIN L51, MITOCHONDRIAL-LIKE;MRPL51
2126	PORTHOMCL2126[AjBfCgCiDrGgLvMmOjOlPsSpXl|(21 genes, 13 taxa)]:	-0.686264	-0.14756	-0.811978	-0.0219853	-0.530441	-0.833853	0.448662	0.51972	0.236882	0.26902	0.176471	-0.505347	CCND2;CCND3	CCND2;CCND3	CCND2;CCND3	CCND2.L;CCND2.S;CCND2	CCND2A;CCND2B;CCND3;CCND2	CCND2A;CCND2B;CCND3;CCND2	G1/S-SPECIFIC CYCLIN-D2-LIKE	CCND2	CCND2_MOUSE	HYPOTHETICAL PROTEIN	CCND1_DANRE	CYCLIN D;CCND1
9034	PORTHOMCL9034[CgDrGgMmOlPsXl|(10 genes, 7 taxa)]:	-0.429176	-0.793758	-0.562418	-0.379694	-0.0841422	-0.782402	0	0	0	0	0	-0.505265	BEND3	BEND3	BEND3	BEND3.S;BEND3	BEND3	BEND3
7179	PORTHOMCL7179[AjBfCgCiDrGgMmOjOlPsSpXl|(12 genes, 12 taxa)]:	-0.423956	-0.824615	-0.303681	-0.0724755	-0.584534	-0.818794	-0.865221	-0.341259	-0.818088	0	-0.4625	-0.504676	MRPS17	MRPS17	MRPS17	MRPS17.L;MRPS17	MRPS17	MRPS17	28S RIBOSOMAL PROTEIN S17, MITOCHONDRIAL-LIKE, TRANSCRIPT VARIANT X2; 28S RIBOSOMAL PROTEIN S17, MITOCHONDRIAL-LIKE, TRANSCRIPT VARIANT X1		RT17_HUMAN	PUTATIVE 28S RIBOSOMAL PROTEIN S17, MITOCHONDRIAL-LIKE		28S RIBOSOMAL PROTEIN S17, MITOCHONDRIAL-LIKE
5185	PORTHOMCL5185[AjBfCgCiDrGgMmOjOlPsSpXl|(14 genes, 12 taxa)]:	-0.195165	-0.652264	-0.525659	-0.849412	-0.455858	-0.343235	-0.771948	-0.660619	0.496029	0	-0.359436	-0.503599	NARS	NARS	NARS	NARS.L;NARS.S;NARS	NARS	NARS	ASPARAGINE--TRNA LIGASE, CYTOPLASMIC;NARS		SYNC_BOVIN;NARS	PUTATIVE ASPARAGINE--TRNA LIGASE, CYTOPLASMIC		ASPARAGINE--TRNA LIGASE, CYTOPLASMIC
11815	PORTHOMCL11815[DrGgMmOlPsXl|(7 genes, 6 taxa)]:	-0.47467	-0.750022	-0.756429	-0.372157	-0.201299	-0.464088	0	0	0	0	0	-0.503111	NRIP1	NRIP1	NRIP1	NRIP1.S;NRIP1	NRIP1B	NRIP1B;NRIP1A;NRIP1
7758	PORTHOMCL7758[CiDrGgMmOjOlPsSpXl|(12 genes, 9 taxa)]:	-0.536044	-0.618242	-0.557527	-0.492059	-0.243284	-0.569588	-0.699961	0	-0.721853	0	-0.45625	-0.502791	NUTF2	NUTF2	NUTF2-PS1;NUTF2	NTF2;NUTF2	NUCLEAR TRANSPORT FACTOR 2;NUTF2	NUTF2;NUTF2L	PROBABLE NUCLEAR TRANSPORT FACTOR 2;RAN-4		NTF2_RAT			NUCLEAR TRANSPORT FACTOR 2
4580	PORTHOMCL4580[AjBfCgCiDrGgLvMmOjOlPsSpXl|(15 genes, 13 taxa)]:	-0.462582	-0.682286	-0.519725	-0.405858	-0.54848	-0.397618	0.537532	-0.236555	-0.0428529	-0.841651	-0.375735	-0.502758	MRTO4	MRTO4	MRTO4	MRTO4.L;MRTO4.S;MRTO4	MRTO4	MRTO4	MRNA TURNOVER PROTEIN 4 HOMOLOG;MRTO4	MRTO4	MRT4_BOVIN;MRTO4	PUTATIVE MRNA TURNOVER PROTEIN 4-LIKE ISOFORM X2;MRTO4	MRT4_HUMAN;MRTO4	MRNA TURNOVER PROTEIN 4 HOMOLOG, TRANSCRIPT VARIANT X3; MRNA TURNOVER PROTEIN 4 HOMOLOG, TRANSCRIPT VARIANT X1; MRNA TURNOVER PROTEIN 4 HOMOLOG, TRANSCRIPT VARIANT X2;MRTO4
5615	PORTHOMCL5615[AjBfCgCiDrGgLvMmOjOlPsSpXl|(14 genes, 13 taxa)]:	-0.281868	-0.281846	-0.113242	-0.84527	-0.562059	-0.927941	-0.727247	0.555315	-0.431971	-0.828772	-0.116912	-0.502038	ALAD	ALAD	ALAD	MGC84775;ALAD.L;ALAD	ALAD	ALAD	DELTA-AMINOLEVULINIC ACID DEHYDRATASE-LIKE, TRANSCRIPT VARIANT X1;ALAD	ALAD	HEM2_PONAB;ALAD	HYPOTHETICAL PROTEIN;ALAD	HEM2_PONAB	DELTA-AMINOLEVULINIC ACID DEHYDRATASE, TRANSCRIPT VARIANT X2; DELTA-AMINOLEVULINIC ACID DEHYDRATASE, TRANSCRIPT VARIANT X1
3307	PORTHOMCL3307[AjBfCgCiDrGgLvMmOjOlPsSpXl|(17 genes, 13 taxa)]:	-0.734231	-0.779824	-0.803352	-0.216397	-0.252623	-0.223194	-0.628974	-0.283217	-0.349029	-0.684458	-0.797916	-0.501603	ATR	ATR	ATR	ATR.L;ATR	ATR	ATR	SERINE/THREONINE-PROTEIN KINASE ATR, TRANSCRIPT VARIANT X1; SERINE/THREONINE-PROTEIN KINASE ATR, TRANSCRIPT VARIANT X2;ATR	ATR	ATR_HUMAN	PUTATIVE SERINE/THREONINE-PROTEIN KINASE ATR;TRANSFORMATION/TRANSCRIPTION DOMAIN-ASSOCIATED PROTEIN	ATR_MOUSE	SERINE/THREONINE-PROTEIN KINASE ATR;ATR
3286	PORTHOMCL3286[AjBfCgCiDrGgLvMmOjOlPsSpXl|(17 genes, 13 taxa)]:	-0.0596703	-0.501758	-0.751593	-0.428897	-0.839461	-0.427324	-0.888247	-0.384549	0.704706	0.453271	0.265319	-0.501451	TRAF6	TRAF6	TRAF6	TRAF6.S	TRAF6	TRAF6	ZINC FINGER PROTEIN		TRAF6_BOVIN	TUMOR NECROSIS FACTOR RECEPTOR-ASSOCIATED FACTOR 6	TRF6A_XENLA;TRF6B_XENLA;TRAF6_HUMAN	TNF RECEPTOR-ASSOCIATED FACTOR 6-A, TRANSCRIPT VARIANT X2; TNF RECEPTOR-ASSOCIATED FACTOR 6-A, TRANSCRIPT VARIANT X1; TNF RECEPTOR-ASSOCIATED FACTOR 6-A, TRANSCRIPT VARIANT X3
3361	PORTHOMCL3361[AjBfCgCiDrGgLvMmOjOlPsSpXl|(17 genes, 13 taxa)]:	-0.396703	-0.650462	-0.560879	-0.390711	-0.536078	-0.473059	0.477623	0.249045	-0.750824	-0.308194	-0.520833	-0.501315	MCM5	MCM5	MCM5	MCM5.L;MCM5.S;MCM5	MCM5	MCM5	DNA REPLICATION LICENSING FACTOR MCM5-A-LIKE;MCM5	MCM5	MCM5A_XENLA;MCM5_DROME;MCM5	PUTATIVE DNA REPLICATION LICENSING FACTOR MCM5	MCM5_XENTR;MCM5	DNA REPLICATION LICENSING FACTOR MCM5;MCM5
6733	PORTHOMCL6733[AjBfCgCiDrGgLvMmOjOlPsSpXl|(13 genes, 13 taxa)]:	-0.46989	-0.315341	-0.548571	-0.876544	-0.342034	-0.453529	-0.704714	0.335734	0.316765	-0.842766	-0.441912	-0.500985	PSMC1	PSMC4	PSMC4	PSMC4.L;PSMC4	PSMC4	PSMC4	26S PROTEASE REGULATORY SUBUNIT 6B		PRS6B_MACFA	PUTATIVE 26S PROTEASE REGULATORY SUBUNIT 6B	PRS6B_MACFA	26S PROTEASE REGULATORY SUBUNIT 6B;PSMC4
6716	PORTHOMCL6716[AjBfCgCiDrGgLvMmOjOlPsSpXl|(13 genes, 13 taxa)]:	-0.357033	-0.685363	-0.242747	-0.77799	-0.152451	-0.784928	-0.805013	-0.339455	-0.714706	0.0709391	-0.24424	-0.500085	MRRF	MRRF	MRRF	MRRF.L;MRRF	MRRF	MRRF	RIBOSOME-RECYCLING FACTOR, MITOCHONDRIAL-LIKE	MRRF	RRFM_BOVIN;MRRF	PUTATIVE RIBOSOME-RECYCLING FACTOR, MITOCHONDRIAL ISOFORM X2;MRRF	RRFM_MOUSE	RIBOSOME-RECYCLING FACTOR, MITOCHONDRIAL, TRANSCRIPT VARIANT X1; RIBOSOME-RECYCLING FACTOR, MITOCHONDRIAL, TRANSCRIPT VARIANT X2;MRRF
8454	PORTHOMCL8454[DrGgMmOlPsXl|(11 genes, 6 taxa)]:	-0.724835	-0.661582	-0.299231	-0.641569	-0.292304	-0.372941	0	0	0	0	0	-0.498744	PFN2	PFN1;PFN2;PFN3	PFN2;GM45800	PFN2.L	PROFILIN-2	PFN2;PFN2L
3892	PORTHOMCL3892[AjBfCgCiDrGgLvMmOjOlPsSpXl|(16 genes, 13 taxa)]:	-0.0414835	-0.382198	-0.913681	-0.322377	-0.78402	-0.546912	-0.75639	-0.305699	0.734765	-0.505593	-0.582108	-0.498445	ANAPC2	ANAPC2	ANAPC2	ANAPC2.L;ANAPC2	ANAPC2	ANAPC2	ANAPHASE-PROMOTING COMPLEX SUBUNIT 2-LIKE;ANAPC2		ANC2_MOUSE;ANAPC2	ANAPHASE-PROMOTING COMPLEX SUBUNIT 2;ANAPC2	ANC2_MOUSE;ANAPC2	ANAPHASE-PROMOTING COMPLEX SUBUNIT 2, TRANSCRIPT VARIANT X2; ANAPHASE-PROMOTING COMPLEX SUBUNIT 2, TRANSCRIPT VARIANT X1;ANAPHASE-PROMOTING COMPLEX SUBUNIT 2-LIKE;ANAPHASE-PROMOTING COMPLEX SUBUNIT 2
10168	PORTHOMCL10168[BfDrGgMmOlPsXl|(8 genes, 7 taxa)]:	-0.317353	-0.75644	-0.516864	-0.405606	-0.354298	-0.638939	0	0	0	0	0	-0.49825	HGF	HGF	HGF	LOC108711206;HGF	HGFB	HGFB
7092	PORTHOMCL7092[AjBfCgDrGgMmOjOlPsSpXl|(12 genes, 11 taxa)]:	-0.0463187	-0.787341	-0.543462	-0.513456	-0.233873	-0.864812	0	0.0973601	-0.865206	0	0.229992	-0.49821	TSEN15	TSEN15	TSEN15	TSEN15.S;TSEN15	TSEN15	TSEN15			SEN15_HUMAN	PUTATIVE TRNA-SPLICING ENDONUCLEASE SUBUNIT SEN15		TRNA-SPLICING ENDONUCLEASE SUBUNIT SEN15
8054	PORTHOMCL8054[AjBfCiDrGgMmOjOlPsSpXl|(11 genes, 11 taxa)]:	-0.455	-0.677363	-0.255934	-0.531618	-0.155735	-0.913008	-0.295584	0.434825	-0.733382	0	-0.640319	-0.49811	MRPL53	MRPL53	MRPL53	MRPL53.L;MRPL53	MRPL53	MRPL53	39S RIBOSOMAL PROTEIN L53, MITOCHONDRIAL-LIKE			PUTATIVE 39S RIBOSOMAL PROTEIN L53, MITOCHONDRIAL ISOFORM X1		39S RIBOSOMAL PROTEIN L53, MITOCHONDRIAL, TRANSCRIPT VARIANT X2; 39S RIBOSOMAL PROTEIN L53, MITOCHONDRIAL, TRANSCRIPT VARIANT X1
691	PORTHOMCL691[AjBfCgDrGgLvMmOjOlPsSpXl|(35 genes, 12 taxa)]:	-0.41022	-0.710945	-0.93456	-0.170648	-0.357402	-0.404118	0	-0.482168	-0.517147	0.186233	0.0667892	-0.497982	TMEM132C;TMEM132E;TMEM132D;TMEM132B	TMEM132E;TMEM132D;TMEM132B;TMEM132C	TMEM132D;TMEM132C;TMEM132E;TMEM132B	TMEM132C.S;LOC108716385;LOC108707518;LOC108707151;TMEM132C;TMEM132E;TMEM132B	SI:DKEY-215K6.1;TRANSMEMBRANE PROTEIN 132D-LIKE;SI:DKEYP-14D3.1;TMEM132E;SI:DKEY-1D7.3	TMEM132E;SI:DKEYP-14D3.1;SI:DKEY-215K6.1;SI:DKEY-1D7.3;CT583723.1;TMEM132A;SI:DKEY-112M2.1;TMEM132C;TMEM132D			T132C_HUMAN	PUTATIVE TRANSMEMBRANE PROTEIN	T132E_DANRE	TRANSMEMBRANE PROTEIN 132B
3749	PORTHOMCL3749[AjBfCgCiDrGgLvMmOjOlPsSpXl|(16 genes, 13 taxa)]:	-0.483352	-0.874462	-0.828571	-0.43598	-0.156397	-0.205118	-0.775818	-0.125064	-0.837824	-0.813519	-0.43848	-0.497313	RFC3	RFC3	RFC3	RFC3.L;RFC3	RFC3	RFC3	REPLICATION FACTOR C SUBUNIT 3-LIKE;RFC3	RFC3	RFC3_HUMAN;RFC3	PUTATIVE REPLICATION FACTOR C SUBUNIT 3;RFC3	RFC3_HUMAN;RFC3	REPLICATION FACTOR C SUBUNIT 3;REPLICATION FACTOR C SUBUNIT 3-LIKE;RFC3
4274	PORTHOMCL4274[BfCgCiDrGgLvMmOjOlPsSpXl|(16 genes, 12 taxa)]:	-0.473077	-0.781802	-0.557198	-0.741593	-0.14701	-0.278647	-0.858122	-0.544691	-0.6415	-0.168277	0.179167	-0.496554	THUMPD3	THUMPD3	THUMPD3	THUMPD3.L;THUMPD3	THUMPD3	THUMPD3	THUMP DOMAIN-CONTAINING PROTEIN 3-LIKE, TRANSCRIPT VARIANT X2; THUMP DOMAIN-CONTAINING PROTEIN 3-LIKE, TRANSCRIPT VARIANT X1		THUM3_BOVIN;THUMPD3		THUM3_MOUSE;THUM3_BOVIN	THUMP DOMAIN-CONTAINING PROTEIN 3-LIKE;THUMP DOMAIN-CONTAINING PROTEIN 3;THUMPD3
9588	PORTHOMCL9588[BfDrGgMmOlPsSpXl|(9 genes, 8 taxa)]:	-0.561484	-0.622242	-0.572692	-0.43201	-0.493578	-0.293294	0	-0.260559	0	0	0	-0.495883	ASB6	ASB6	ASB6	ASB6.S	ASB6	ASB6						ANKYRIN-1-LIKE
4946	PORTHOMCL4946[AjBfCgCiDrGgLvMmOjOlPsSpXl|(15 genes, 13 taxa)]:	-0.205659	-0.815824	-0.707143	-0.243701	-0.810662	-0.192088	0.452117	-0.665385	0.6035	0.349907	0.387868	-0.495846	TFAP4	TFAP4	TFAP4	LOC108703190;LOC108701636;TFAP4	TRANSCRIPTION FACTOR AP-4;TFAP4;TFAP4 (1 OF MANY)	TFAP4	TRANSCRIPTION FACTOR PROTEIN, TRANSCRIPT VARIANT X1; TRANSCRIPTION FACTOR PROTEIN	TFAP4	TFAP4_HUMAN;TFAP4	PUTATIVE TRANSCRIPTION FACTOR AP-4	TFAP4_HUMAN	TRANSCRIPTION FACTOR AP-4
1044	PORTHOMCL1044[AjBfCgCiDrGgLvMmOjOlPsSpXl|(29 genes, 13 taxa)]:	-0.0964835	-0.864747	-0.614176	-0.235392	-0.640564	-0.521029	-0.688156	0.132797	-0.903618	-0.804582	-0.626471	-0.495399	NCAPG2;DNPEP	NCAPG2	NCAPG2;DNPEP	NCAPG2.L;DNPEP.L;NCAPG2	NCAPG2;DNPEP	NCAPG2;DNPEP	CONDENSIN-2 COMPLEX SUBUNIT G2-LIKE;ASPARTYL AMINOPEPTIDASE-LIKE;DNPEP	DNPEP	CNDG2_XENLA;DNPEP_BOVIN;DNPEP_MOUSE;DNPEP	HYPOTHETICAL PROTEIN;PUTATIVE CONDENSIN-2 COMPLEX SUBUNIT G2	CNDG2_MOUSE	CONDENSIN-2 COMPLEX SUBUNIT G2;ASPARTYL AMINOPEPTIDASE;DNPEP
3820	PORTHOMCL3820[AjBfCgCiDrGgMmOjOlPsSpXl|(16 genes, 12 taxa)]:	-0.624286	-0.461319	-0.665989	-0.278554	-0.49826	-0.440235	-0.724	-0.342587	-0.608118	0	-0.297426	-0.494774	PDZD11	PDZD11	PDZD11	PDZD11.L;PDZD11	PDZD11	PDZD11	PDZ DOMAIN-CONTAINING PROTEIN 11-LIKE;PDZD11		PDZ11_CHICK	PUTATIVE PDZ DOMAIN-CONTAINING PROTEIN 11		PDZ DOMAIN-CONTAINING PROTEIN 11
6643	PORTHOMCL6643[AjBfCgDrGgLvMmOjOlPsSpXl|(13 genes, 12 taxa)]:	-0.526154	-0.738242	-0.543132	-0.236765	-0.161397	-0.759088	0	0	-0.704588	0	-0.640809	-0.49413	PNPT1	PNPT1	PNPT1	PNPT1.S;PNPT1	PNPT1	CABZ01109843.1		PNPT1	PNPT1_HUMAN;PNPT1	PUTATIVE POLYRIBONUCLEOTIDE NUCLEOTIDYLTRANSFERASE 1, MITOCHONDRIAL;PNPT1	PNP_OCEIH;PNP_SPICI	POLYRIBONUCLEOTIDE NUCLEOTIDYLTRANSFERASE 1, MITOCHONDRIAL;PNPT1
8057	PORTHOMCL8057[AjBfCiDrGgMmOjOlPsSpXl|(11 genes, 11 taxa)]:	-0.0482967	-0.661714	-0.597088	-0.749877	-0.625613	-0.276618	-0.920636	0.528322	0.170471	0	-0.75674	-0.493201	ZNF330	ZNF330	ZFP330;ZNF330	ZNF330.S;ZNF330	ZNF330	ZNF330	ZINC FINGER PROTEIN 330-LIKE;ZNF330	ZNF330	ZN330_PONAB;ZNF330	HYPOTHETICAL PROTEIN;ZNF330		ZINC FINGER PROTEIN 330 HOMOLOG;ZNF330
6252	PORTHOMCL6252[AjBfDrGgLvMmOjOlPsSpXl|(13 genes, 11 taxa)]:	-0.392692	-0.672484	-0.449835	-0.479069	-0.548652	-0.415647	0	-0.634056	-0.790588	0.289309	-0.534436	-0.493063	NANS	NANS	NANS	NANS.L	NANSA;NANS	NANSA;NANS (1 OF MANY);NANS		NANS	SIAS_HUMAN;NANS	HYPOTHETICAL PROTEIN;NANS	SIAS_HUMAN	SIALIC ACID SYNTHASE;NANS
2268	PORTHOMCL2268[AjBfCgCiDrGgLvMmOjOlPsSpXl|(20 genes, 13 taxa)]:	-0.513242	-0.769626	-0.503297	-0.707083	-0.322181	-0.141853	-0.707805	-0.109021	-0.604824	-0.641135	-0.288426	-0.49288	RAD50	RAD50	RAD50	RAD50.L;RAD50	RAD50	RAD50	DNA REPAIR PROTEIN RAD50	RAD50	RAD50_MOUSE	PUTATIVE DNA REPAIR PROTEIN	RAD50_HUMAN	DNA REPAIR PROTEIN RAD50;DNA REPAIR PROTEIN RAD50-LIKE;RAD50
2971	PORTHOMCL2971[AjBfCgCiDrGgLvMmOjOlPsSpXl|(18 genes, 13 taxa)]:	-0.252582	-0.577626	-0.719396	-0.766544	-0.0755147	-0.563118	-0.219338	-0.403029	0.128353	0.329453	-0.371078	-0.492463	NPEPPS	NPEPPS	NPEPPS	NPEPPS.L	NPEPPS	NPEPPS	PUROMYCIN-SENSITIVE AMINOPEPTIDASE-LIKE, TRANSCRIPT VARIANT X2; PUROMYCIN-SENSITIVE AMINOPEPTIDASE-LIKE, TRANSCRIPT VARIANT X1;NPEPPS		PSA_MOUSE;NPEPPS	PUTATIVE PUROMYCIN-SENSITIVE AMINOPEPTIDASE;NPEPPS	AMPN_BOVIN;PSA_MOUSE;ANPEP	PUROMYCIN-SENSITIVE AMINOPEPTIDASE;GLUTAMYL AMINOPEPTIDASE-LIKE;PUROMYCIN-SENSITIVE AMINOPEPTIDASE-LIKE;NPEPPS
1854	PORTHOMCL1854[AjBfCgCiDrGgLvMmOlPsSpXl|(22 genes, 12 taxa)]:	-0.727527	-0.70044	-0.353516	-0.241495	-0.741667	-0.189794	-0.891649	-0.671748	0	-0.487121	-0.673039	-0.492407	RBL1;RBL2	RBL1;RBL2	RBL1;RBL2	RBL1.L;LOC108714013;RBL2	RBL1	RBL1;RBL2	RETINOBLASTOMA-LIKE PROTEIN 2	RBL1		HYPOTHETICAL PROTEIN;PUTATIVE RETINOBLASTOMA-LIKE PROTEIN 1;RBL1	RBL1_HUMAN	RETINOBLASTOMA-LIKE PROTEIN 1;RBL2
4605	PORTHOMCL4605[AjBfCgCiDrGgLvMmOlPsSpXl|(15 genes, 12 taxa)]:	-0.416099	-0.865978	-0.394286	-0.943284	-0.0338971	-0.295265	-0.801494	-0.69042	0	-0.322621	-0.687623	-0.491468	IPO5	IPO5	IPO4	IPO4.L;IPO4	IPO4	IPO4	IMPORTIN-4-LIKE	IPO4		HYPOTHETICAL PROTEIN;IPO4	IPO4_HUMAN;IPO4	IMPORTIN-4, TRANSCRIPT VARIANT X1; IMPORTIN-4, TRANSCRIPT VARIANT X2;IMPORTIN-4;IMPORTIN-4-LIKE;IPO4
2186	PORTHOMCL2186[AjBfCgCiDrGgLvMmOjOlPsSpXl|(20 genes, 13 taxa)]:	-0.0351648	-0.634022	-0.552802	-0.902108	-0.0686765	-0.7525	-0.675896	0.668252	0.00808824	0.433375	-0.117647	-0.490879	STIP1	STIP1	STIP1	STIP1.S;STIP1.L;STIP1	STIP1	STIP1	STRESS-INDUCED-PHOSPHOPROTEIN 1;STRESS-INDUCED-PHOSPHOPROTEIN 1-LIKE;STIP1	STIP1	STIP1_MACFA;HSOP_WHEAT;STIP1	PUTATIVE STRESS-INDUCED-PHOSPHOPROTEIN 1-LIKE;CHAIN A, HOP TPR2A DOMAIN IN COMPLEX WITH THE NON-COGNATE HSC70 PEPTIDE LIGAND;STI1	STIP1_CRIGR	STRESS-INDUCED-PHOSPHOPROTEIN 1
7225	PORTHOMCL7225[AjBfCgDrGgLvMmOjOlPsSpXl|(12 genes, 12 taxa)]:	-0.45011	-0.503341	-0.0375275	-0.211887	-0.85826	-0.883912	0	-0.666923	0.514941	-0.535335	-0.616422	-0.490839	BLMH	BLMH	BLMH	BLMH.L;BLMH	BLMH	BLMH		BLMH	BLMH_CHICK	PUTATIVE BLEOMYCIN HYDROLASE;BLMH	BLMH_HUMAN;BLMH	BLEOMYCIN HYDROLASE;BLMH
8348	PORTHOMCL8348[BfCgCiDrGgMmOjOlPsSpXl|(11 genes, 11 taxa)]:	-0.24511	-0.000835165	-0.556209	-0.887475	-0.573971	-0.681412	0.142662	-0.619711	-0.176882	0	-0.410049	-0.490835	FARSA	FARSA	FARSA	FARSA.L	FARSA	FARSA	ZINC FINGER (CCHC)-15	FARSA	SYFA_DANRE;FARSA			PHENYLALANINE--TRNA LIGASE ALPHA SUBUNIT;FARSA
5457	PORTHOMCL5457[AjCgCiDrGgLvMmOlPsXl|(14 genes, 10 taxa)]:	-0.305385	-0.553363	-0.544835	-0.796152	-0.235392	-0.507882	0.234377	0	0	-0.450258	0	-0.490501	BTF3	BTF3	BTF3	LOC108717780;BTF3.L;BTF3	BTF3;TRANSCRIPTION FACTOR BTF3	BTF3	BASIC TRANSCRIPTION FACTOR 3			TRANSCRIPTION FACTOR BTF3;PUTATIVE TRANSCRIPTION FACTOR BTF3-LIKE 4;BTF3L4	BT3L4_XENTR
10803	PORTHOMCL10803[BfDrGgMmOlPsXl|(7 genes, 7 taxa)]:	-0.52	-0.967824	-0.747198	-0.292157	-0.241103	-0.170441	0	0.421958	0	0	0	-0.489787	NUF2	NUF2	NUF2	NUF2.L	NUF2	NUF2
4578	PORTHOMCL4578[AjBfCgCiDrGgLvMmOjOlPsSpXl|(15 genes, 13 taxa)]:	-0.404011	-0.717231	-0.358626	-0.609951	-0.311765	-0.536794	-0.644494	0.728392	-0.704324	-0.43742	-0.334856	-0.48973	MTIF2	MTIF2	MTIF2	LOC108716409;MTIF2	MTIF2	MTIF2	TRANSLATION INITIATION FACTOR IF-2, MITOCHONDRIAL;MTIF2	MTIF2	IF2M_BOVIN;MTIF2	PUTATIVE TRANSLATION INITIATION FACTOR IF-2, MITOCHONDRIAL;PUTATIVE TRANSLATION INITIATION FACTOR IF-2, MITOCHONDRIAL-LIKE;MTIF2	IF2M_BOVIN;MTIF2	TRANSLATION INITIATION FACTOR IF-2, MITOCHONDRIAL;TRANSLATION INITIATION FACTOR IF-2, MITOCHONDRIAL-LIKE;MTIF2
2147	PORTHOMCL2147[AjBfCgCiDrGgLvMmOjOlPsSpXl|(21 genes, 13 taxa)]:	-0.18544	-0.730374	-0.853407	-0.171127	-0.244167	-0.752388	-0.274026	-0.644081	-0.316235	-0.760454	-0.26875	-0.489484	ARID1B;ARID1A	ARID1A	ARID1B;ARID1A	LOC108716708;LOC108707477;ARID1A	ARID1AB;ARID1AA;ARID1A	ARID1B	AT-RICH INTERACTIVE DOMAIN-CONTAINING PROTEIN 1A-LIKE, TRANSCRIPT VARIANT X1; AT-RICH INTERACTIVE DOMAIN-CONTAINING PROTEIN 1A-LIKE, TRANSCRIPT VARIANT X2		ARI1B_HUMAN	PUTATIVE AT-RICH INTERACTIVE DOMAIN-CONTAINING PROTEIN 1A ISOFORM X5	ARI1B_HUMAN	AT-RICH INTERACTIVE DOMAIN-CONTAINING PROTEIN 1A, TRANSCRIPT VARIANT X4; AT-RICH INTERACTIVE DOMAIN-CONTAINING PROTEIN 1A, TRANSCRIPT VARIANT X3; AT-RICH INTERACTIVE DOMAIN-CONTAINING PROTEIN 1A, TRANSCRIPT VARIANT X2; AT-RICH INTERACTIVE DOMAIN-CONTAINING PROTEIN 1A, TRANSCRIPT VARIANT X5; AT-RICH INTERACTIVE DOMAIN-CONTAINING PROTEIN 1A, TRANSCRIPT VARIANT X1
9410	PORTHOMCL9410[AjDrGgLvMmOlPsXl|(9 genes, 8 taxa)]:	-0.00802198	-0.787253	-0.201264	-0.603466	-0.529276	-0.806059	0	0	0	0.4671	0	-0.489223	ST5	ST5	ST5	LOC108713445;ST5.S;ST5	ST5	ST5				PUTATIVE SERINE/ARGININE REPETITIVE MATRIX PROTEIN 1	ST5_HUMAN
5315	PORTHOMCL5315[AjBfCgCiDrGgLvMmOjOlPsSpXl|(14 genes, 13 taxa)]:	-0.237582	-0.0556923	-0.455495	-0.413235	-0.86527	-0.906529	0.858416	-0.773916	0.851853	0.316533	0.298284	-0.488967	RPS6	A0PAH1_PELSI;RPS6	RPS6	RPS6.L;RPS6.S;RPS6	RPS6	RPS6	40S RIBOSOMAL PROTEIN S6-LIKE, TRANSCRIPT VARIANT X1; 40S RIBOSOMAL PROTEIN S6-LIKE, TRANSCRIPT VARIANT X2;RPS6		RS6_BRAFL	RIBOSOMAL PROTEIN S6;RPS6	RS6_BRAFL	40S RIBOSOMAL PROTEIN S6;RPS6
6812	PORTHOMCL6812[AjCgCiDrGgLvMmOjOlPsSpXl|(13 genes, 12 taxa)]:	-0.405879	-0.654549	-0.578187	-0.529387	-0.583382	-0.179588	-0.679052	0	-0.473941	-0.886233	-0.302328	-0.488496	GCN1	GCN1L1	GCN1L1	GCN1.L	GCN1;GCN1L1	GCN1;GCN1L1	EIF-2-ALPHA KINASE ACTIVATOR GCN1		GCN1_MOUSE	HYPOTHETICAL PROTEIN	GCN1_MOUSE	TRANSLATIONAL ACTIVATOR GCN1;TRANSLATIONAL ACTIVATOR GCN1-LIKE;GCN1
4960	PORTHOMCL4960[AjBfCgCiDrGgLvMmOjOlPsSpXl|(15 genes, 13 taxa)]:	-0.345604	-0.910901	-0.667033	-0.0646324	-0.482426	-0.458294	0.227221	0.0427459	0.477882	0.0584727	0.0477941	-0.488149	TDP1	TDP1	TDP1	TDP1.L;TDP1	TDP1	TDP1	TYROSYL-DNA PHOSPHODIESTERASE 1-LIKE;TDP1	TDP1	TYDP1_HUMAN;TDP1	PUTATIVE TYROSYL-DNA PHOSPHODIESTERASE 1-LIKE;TDP1	TYDP1_HUMAN;TDP1	TYROSYL-DNA PHOSPHODIESTERASE 1;TYROSYL-DNA PHOSPHODIESTERASE 1, TRANSCRIPT VARIANT X1; TYROSYL-DNA PHOSPHODIESTERASE 1, TRANSCRIPT VARIANT X2
6767	PORTHOMCL6767[AjCgCiDrGgMmOjOlPsSpXl|(13 genes, 11 taxa)]:	-0.493516	-0.683868	-0.723956	-0.193529	-0.592279	-0.23242	-0.70987	0	-0.837029	0	-0.609069	-0.486595	E2F7	E2F7	E2F7	E2F7.L;LOC108713138;E2F7	E2F7	E2F7	UNCHARACTERIZED LOC100177540, TRANSCRIPT VARIANT X2; UNCHARACTERIZED LOC100177540, TRANSCRIPT VARIANT X1; UNCHARACTERIZED LOC100177540, TRANSCRIPT VARIANT X3		E2F7_BOVIN	PUTATIVE TRANSCRIPTION FACTOR E2F7		TRANSCRIPTION FACTOR E2F7
3972	PORTHOMCL3972[AjBfCgCiDrGgLvMmOjOlPsSpXl|(16 genes, 13 taxa)]:	-0.404231	-0.572088	-0.566758	-0.384741	-0.161961	-0.829266	-0.894818	0.596364	-0.645412	0.124623	-0.432353	-0.486507	ATXN10	ATXN10	ATXN10	ATXN10.L;ATXN10	ATXN10	ATXN10	ATAXIN-10-LIKE, TRANSCRIPT VARIANT X1; ATAXIN-10-LIKE, TRANSCRIPT VARIANT X2		ATX10_BOVIN;ATXN10	HYPOTHETICAL PROTEIN;PUTATIVE ATAXIN-10-LIKE;PUTATIVE ATAXIN-10	ATX10_XENTR	ATAXIN-10, TRANSCRIPT VARIANT X1
4142	PORTHOMCL4142[AjBfCgCiDrGgLvMmOjOlPsSpXl|(16 genes, 13 taxa)]:	-0.282308	-0.604703	-0.590165	-0.845931	-0.331373	-0.259471	-0.18061	0	0.0804706	0.499732	-0.112255	-0.485658	PSMB4	PSMB4	PSMB4	PSMB4.L;PSMB4.S;PSMB4	PSMB4	PSMB4	PROTEASOME SUBUNIT BETA TYPE-4-LIKE;PSMB4	PSMB4	PSB4_BOVIN	PUTATIVE PROTEASOME SUBUNIT BETA TYPE-4;PSMB4	PSB4_BOVIN;PSMB4	PROTEASOME SUBUNIT BETA TYPE-4;PSMB4
3812	PORTHOMCL3812[AjBfCgCiDrGgLvMmOlPsSpXl|(16 genes, 12 taxa)]:	-0.608846	-0.578242	-0.236593	-0.165294	-0.439436	-0.881794	-0.729935	-0.192727	0	-0.541775	-0.748529	-0.485034	MRPS31	MRPS31	MRPS31	MRPS31.S;MRPS31.L;MRPS31	MRPS31	MRPS31	28S RIBOSOMAL PROTEIN S31, MITOCHONDRIAL-LIKE			PUTATIVE 28S RIBOSOMAL PROTEIN S31, MITOCHONDRIAL-LIKE;MRPS31	RT31_BOVIN;MRPS31	28S RIBOSOMAL PROTEIN S31, MITOCHONDRIAL
4397	PORTHOMCL4397[AjBfCgCiDrGgLvMmOjOlPsSpXl|(15 genes, 13 taxa)]:	-0.500275	-0.772484	-0.575659	-0.159706	-0.51	-0.387118	-0.604195	-0.439333	-0.243588	-0.700144	-0.680025	-0.484207	NUP133	NUP133	NUP133	NUP133.L;NUP133	NUP133	NUP133	NUCLEAR PORE COMPLEX PROTEIN NUP133-LIKE	NUP133	NU133_MOUSE	PUTATIVE NUCLEAR PORE COMPLEX PROTEIN	NU133_MOUSE	NUCLEAR PORE COMPLEX PROTEIN NUP133
5224	PORTHOMCL5224[AjBfCiDrGgLvMmOjOlPsSpXl|(14 genes, 12 taxa)]:	-0.575385	-0.733934	-0.663297	-0.307794	-0.160564	-0.460706	-0.909948	0.855524	-0.744059	-0.738762	-0.455515	-0.483613	ORC4	ORC4	ORC4	ORC4.L;ORC4	ORC4	ORC4	ORIGIN RECOGNITION COMPLEX SUBUNIT 4;ORC4	ORC4	ORC4_XENLA;ORC4	PUTATIVE ORIGIN RECOGNITION COMPLEX SUBUNIT 4-LIKE;ORC4	ORC4_HUMAN;ORC4	ORIGIN RECOGNITION COMPLEX SUBUNIT 4, TRANSCRIPT VARIANT X2; ORIGIN RECOGNITION COMPLEX SUBUNIT 4, TRANSCRIPT VARIANT X1;ORIGIN RECOGNITION COMPLEX SUBUNIT 4-LIKE;ORC4
6060	PORTHOMCL6060[CgCiDrGgLvMmOjOlPsSpXl|(14 genes, 11 taxa)]:	-0.0302747	-0.79367	-0.707253	-0.629216	-0.66598	-0.0745	-0.82061	0	0.448324	-0.762316	0.042428	-0.483482	BNIP1	BNIP1	BNIP1	BNIP1.L;BNIP1.S;BNIP1	BNIP1A;BNIP1B	BNIP1B;BNIP1A	VESICLE TRANSPORT PROTEIN SEC20-LIKE, TRANSCRIPT VARIANT X2; VESICLE TRANSPORT PROTEIN SEC20-LIKE, TRANSCRIPT VARIANT X1;BNIP1		SEC20_HUMAN		SEC20_MOUSE;BNIP1	VESICLE TRANSPORT PROTEIN SEC20;BNIP1
1433	PORTHOMCL1433[AjBfCgCiDrGgLvMmOjOlPsSpXl|(25 genes, 13 taxa)]:	-0.607033	-0.323121	-0.46967	-0.899289	-0.148652	-0.449912	-0.795104	-0.538427	-0.497853	-0.071806	-0.231373	-0.482946	KPNA6;KPNA5;KPNA1	KPNA6	KPNA6;KPNA1	KPNA6.L;KPNA1.S	KPNA6	KPNA6;KPNA5;KPNA1	IMPORTIN SUBUNIT ALPHA-7;KPNA6	KPNA6	IMA7_PONAB;IMA6_RAT;KPNA6	PUTATIVE IMPORTIN SUBUNIT ALPHA-7 ISOFORM X1	IMA7_BOVIN;IMA6_RAT;KPNA6	IMPORTIN SUBUNIT ALPHA-7, TRANSCRIPT VARIANT X2; IMPORTIN SUBUNIT ALPHA-7, TRANSCRIPT VARIANT X3; IMPORTIN SUBUNIT ALPHA-7, TRANSCRIPT VARIANT X1;IMPORTIN SUBUNIT ALPHA-7;KINESIN-RELATED PROTEIN 4;KPNA6
6696	PORTHOMCL6696[AjBfCgCiDrGgLvMmOjOlPsSpXl|(13 genes, 13 taxa)]:	-0.357473	-0.569407	-0.458516	-0.750931	-0.537647	-0.223529	-0.85826	-0.341023	-0.586353	0.0758358	-0.516667	-0.482917	PDCD2	PDCD2	PDCD2	PDCD2.S;PDCD2	PDCD2	PDCD2	PROGRAMMED CELL DEATH PROTEIN 2;PDCD2	PDCD2	PDCD2_BOVIN;PDCD2	PROGRAMMED CELL DEATH PROTEIN 2;PDCD2	PDCD2_MOUSE	PROGRAMMED CELL DEATH PROTEIN 2
586	PORTHOMCL586[AjBfCgCiDrGgLvMmOjOlPsSpXl|(39 genes, 13 taxa)]:	-0.560549	-0.316703	-0.576099	-0.532377	-0.699167	-0.211029	-0.898195	-0.0324084	0.142618	-0.748524	0.56027	-0.482654	RECQL	RECQL	RECQL	RECQL.L;RECQL	RECQL	RECQL	ATP-DEPENDENT DNA HELICASE Q1, TRANSCRIPT VARIANT X1; ATP-DEPENDENT DNA HELICASE Q1, TRANSCRIPT VARIANT X2;ATP-DEPENDENT DNA HELICASE Q1-LIKE, TRANSCRIPT VARIANT X2; ATP-DEPENDENT DNA HELICASE Q1-LIKE, TRANSCRIPT VARIANT X1;RECQL		RECQ1_HUMAN;RECQL	PUTATIVE BLOOM SYNDROME PROTEIN-LIKE;HYPOTHETICAL PROTEIN;RECQL	RECQ_ECOLI;RECQ1_HUMAN	ATP-DEPENDENT DNA HELICASE Q1, TRANSCRIPT VARIANT X2; ATP-DEPENDENT DNA HELICASE Q1, TRANSCRIPT VARIANT X1;RECQL
3179	PORTHOMCL3179[AjBfCgCiDrGgLvMmOjOlPsSpXl|(17 genes, 13 taxa)]:	-0.521209	-0.637714	-0.552857	-0.904461	-0.052402	-0.226735	0.479052	-0.20042	-0.784235	0.00224974	-0.486887	-0.482563	PSMD7	PSMD7	PSMD7	PSMD7.S;PSMD7.L;PSMD7	PSMD7	PSMD7	26S PROTEASOME NON-ATPASE REGULATORY SUBUNIT 7-LIKE, TRANSCRIPT VARIANT X2;UNCHARACTERIZED LOC100186402, TRANSCRIPT VARIANT X1; UNCHARACTERIZED LOC100186402, TRANSCRIPT VARIANT X2	PSMD7	PSMD7_DROME	PUTATIVE 26S PROTEASOME NON-ATPASE REGULATORY SUBUNIT 7	PSMD7_DROME	26S PROTEASOME NON-ATPASE REGULATORY SUBUNIT 7;26S PROTEASOME NON-ATPASE REGULATORY SUBUNIT 7-LIKE;PSMD7
4901	PORTHOMCL4901[AjBfCgCiDrGgLvMmOjOlPsSpXl|(15 genes, 13 taxa)]:	-0.0136813	-0.639912	-0.682033	-0.837696	-0.488088	-0.228441	-0.852182	-0.169161	0.586458	0.351084	-0.549755	-0.481642	IGHMBP2	IGHMBP2	IGHMBP2	IGHMBP2.L;IGHMBP2	IGHMBP2	IGHMBP2	ZINC FINGER PROTEIN 2;IGHMBP2	IGHMBP2	SMBP2_HUMAN;IGHMBP2	PUTATIVE DNA-BINDING PROTEIN SMUBP-2-LIKE;PUTATIVE DNA-BINDING PROTEIN SMUBP-2;IGHMBP2	SMBP2_HUMAN;IGHMBP2	DNA-BINDING PROTEIN SMUBP-2;IGHMBP2
3699	PORTHOMCL3699[AjBfCgCiDrGgMmOjOlPsSpXl|(16 genes, 12 taxa)]:	-0.342692	-0.692659	-0.904231	-0.22049	-0.0432843	-0.685441	-0.86713	-0.522086	0.317977	0	-0.179644	-0.481466	YEATS2	YEATS2	YEATS2	YEATS2.L;YEATS2	YEATS2	YEATS2	YEATS DOMAIN-CONTAINING PROTEIN 2		YETS2_HUMAN	PUTATIVE YEATS DOMAIN-CONTAINING PROTEIN 2		YEATS DOMAIN-CONTAINING PROTEIN 2
5603	PORTHOMCL5603[AjBfCgCiDrGgLvMmOjOlPsSpXl|(14 genes, 13 taxa)]:	-0.670385	-0.551033	-0.588352	-0.164902	-0.245784	-0.663029	-0.312169	-0.658128	-0.746441	0.145201	-0.0573529	-0.480581	NUBPL	NUBPL	NUBPL	NUBPL.L;NUBPL	NUBPL	NUBPL	IRON-SULFUR PROTEIN NUBPL-LIKE, TRANSCRIPT VARIANT X1; IRON-SULFUR PROTEIN NUBPL-LIKE, TRANSCRIPT VARIANT X2;NUBPL	NUBPL	NUBPL_HUMAN;NUBPL	PUTATIVE IRON-SULFUR PROTEIN NUBPL;NUBPL	NUBPL_MOUSE;NUBPL	IRON-SULFUR PROTEIN NUBPL;NUBPL
4121	PORTHOMCL4121[AjBfCgCiDrGgLvMmOjOlPsSpXl|(16 genes, 13 taxa)]:	-0.220495	-0.644571	-0.640275	-0.239387	-0.383799	-0.754261	-0.891429	-0.581812	-0.426294	-0.420557	0.516299	-0.480465	BECN1	BECN1	BECN1;GM38100;BECN2	LOC108701789;LOC108702722;BECN1	BECN1	BECN1	BECLIN-1	BECN1	BECN1_XENLA;BECN1	PUTATIVE BECLIN-1;BECN1	BECN1_PIG;BECN1	BECLIN-1;BECN1
5429	PORTHOMCL5429[AjBfCgDrGgLvMmOjOlPsSpXl|(14 genes, 12 taxa)]:	-0.485659	-0.833275	-0.551868	-0.165539	-0.659363	-0.18649	0	-0.689896	-0.0564528	-0.806914	-0.648039	-0.480366	CCNF	CCNF	CCNF	CCNF.L;LOC108703171;CCNF	CCNF	CCNF			CCNF_MOUSE;CCNF	PUTATIVE CYCLIN-F-LIKE ISOFORM X2;CCNF	CCNF_XENLA	CYCLIN-F-LIKE, TRANSCRIPT VARIANT X2; CYCLIN-F-LIKE, TRANSCRIPT VARIANT X1; CYCLIN-F-LIKE, TRANSCRIPT VARIANT X3;CYCLIN-F;CCNF
6606	PORTHOMCL6606[AjBfCgCiDrGgLvMmOjOlPsSpXl|(13 genes, 13 taxa)]:	-0.368901	-0.605582	-0.357912	-0.604363	-0.120441	-0.818912	-0.723623	-0.403839	-0.243706	-0.142642	0.285907	-0.479352	COPS2	COPS2	COPS2	COPS2.S;COPS2	COPS2	COPS2	COP9 SIGNALOSOME COMPLEX SUBUNIT 2-LIKE;COPS2		CSN2_XENLA	PUTATIVE COP9 SIGNALOSOME COMPLEX SUBUNIT 2	CSN2_XENLA;COPS2	COP9 SIGNALOSOME COMPLEX SUBUNIT 2;COPS2
6383	PORTHOMCL6383[AjBfCgCiDrGgLvMmOjOlPsSpXl|(13 genes, 13 taxa)]:	-0.350659	-0.792088	-0.522198	-0.274069	-0.49875	-0.437382	-0.811416	-0.00453374	-0.419941	-0.121383	-0.617279	-0.479191	MED17	MED17	MED17	MED17.L;MED17	MED17	CABZ01056631.1;MED17	MEDIATOR OF RNA POLYMERASE II TRANSCRIPTION SUBUNIT 17-LIKE;MED17	MED17	MED17_MOUSE;MED17	PUTATIVE MEDIATOR OF RNA POLYMERASE II TRANSCRIPTION SUBUNIT 17 ISOFORM X2;MED17	MED17_MOUSE;MED17	MEDIATOR OF RNA POLYMERASE II TRANSCRIPTION SUBUNIT 17, TRANSCRIPT VARIANT X2; MEDIATOR OF RNA POLYMERASE II TRANSCRIPTION SUBUNIT 17, TRANSCRIPT VARIANT X1;MED17
9168	PORTHOMCL9168[AjBfDrGgMmOlPsSpXl|(9 genes, 9 taxa)]:	-0.133736	-0.665363	-0.901209	-0.081299	-0.439142	-0.646706	0	0.13958	0	0	-0.188779	-0.477909	FAM204A	FAM204A	FAM204A	FAM204A.L	FAM204A	FAM204A				HYPOTHETICAL PROTEIN		PROTEIN FAM204A-LIKE
5670	PORTHOMCL5670[AjBfCgCiDrGgLvMmOlPsSpXl|(14 genes, 12 taxa)]:	-0.450055	-0.859077	-0.444615	-0.142892	-0.580147	-0.387235	-0.857649	-0.164965	0	-0.853622	-0.526348	-0.477337	PTCD1	PTCD1	PTCD1	PTCD1.L;PTCD1	PTCD1	PTCD1	PENTATRICOPEPTIDE REPEAT-CONTAINING PROTEIN 1, MITOCHONDRIAL			PUTATIVE PENTATRICOPEPTIDE REPEAT-CONTAINING PROTEIN 1, MITOCHONDRIAL	PTCD1_PONAB	PENTATRICOPEPTIDE REPEAT-CONTAINING PROTEIN 1, MITOCHONDRIAL
6357	PORTHOMCL6357[AjBfCgCiDrGgLvMmOjOlPsSpXl|(13 genes, 13 taxa)]:	-0.170549	-0.763473	-0.474396	-0.106005	-0.485074	-0.861238	-0.88187	-0.432739	-0.582588	-0.463013	0.145711	-0.476789	ALG12	ALG12	ALG12	ALG12.L;ALG12	ALG12	ALG12	DOL-P-MAN:MAN(7)GLCNAC(2)-PP-DOL ALPHA-1,6-MANNOSYLTRANSFERASE;ALG12	ALG12	ALG12_MOUSE;EOG090X04MD	PUTATIVE DOL-P-MAN:MAN(7)GLCNAC(2)-PP-DOL ALPHA-1,6-MANNOSYLTRANSFERASE	ALG12_MOUSE;ALG12	DOL-P-MAN:MAN(7)GLCNAC(2)-PP-DOL ALPHA-1,6-MANNOSYLTRANSFERASE
5261	PORTHOMCL5261[AjBfCgCiDrGgLvMmOjOlPsSpXl|(14 genes, 13 taxa)]:	-0.0542857	-0.684659	-0.48467	-0.895564	-0.07125	-0.668265	-0.550792	-0.833035	-0.833294	-0.18937	-0.370833	-0.476449	GFM2	GFM2	GFM2	GFM2.L;GFM2	GFM2	GFM2	RIBOSOME-RELEASING FACTOR 2, MITOCHONDRIAL, TRANSCRIPT VARIANT X3; RIBOSOME-RELEASING FACTOR 2, MITOCHONDRIAL, TRANSCRIPT VARIANT X2; RIBOSOME-RELEASING FACTOR 2, MITOCHONDRIAL, TRANSCRIPT VARIANT X1;GFM2	GFM2	RRF2M_BOVIN	PUTATIVE RIBOSOME-RELEASING FACTOR 2, MITOCHONDRIAL;GFM2	RRF2M_MOUSE	RIBOSOME-RELEASING FACTOR 2, MITOCHONDRIAL;GFM2
6121	PORTHOMCL6121[AjBfCgCiDrGgMmOjOlPsSpXl|(13 genes, 12 taxa)]:	-0.521978	-0.643956	-0.544121	-0.238922	-0.56424	-0.342706	-0.834818	-0.536014	-0.885265	0	-0.702941	-0.475987	EMG1	EMG1	EMG1	EMG1.S;EMG1	EMG1	EMG1	RIBOSOMAL RNA SMALL SUBUNIT METHYLTRANSFERASE NEP1-LIKE;EMG1	EMG1	NEP1_MOUSE;EMG1	PUTATIVE RIBOSOMAL RNA SMALL SUBUNIT METHYLTRANSFERASE NEP1;EMG1		RIBOSOMAL RNA SMALL SUBUNIT METHYLTRANSFERASE NEP1;EMG1
4360	PORTHOMCL4360[AjBfCgCiDrGgLvMmOjOlPsSpXl|(15 genes, 13 taxa)]:	-0.226264	-0.369495	-0.554505	-0.588824	-0.546936	-0.568294	0.463234	-0.772681	0.683824	-0.807678	-0.532475	-0.47572	NACA	NACA2	NACA	NACA.2.L	NACA	NACA	NASCENT POLYPEPTIDE-ASSOCIATED COMPLEX SUBUNIT ALPHA, TRANSCRIPT VARIANT X1; NASCENT POLYPEPTIDE-ASSOCIATED COMPLEX SUBUNIT ALPHA, TRANSCRIPT VARIANT X2; NASCENT POLYPEPTIDE-ASSOCIATED COMPLEX SUBUNIT ALPHA, TRANSCRIPT VARIANT X3;NACA	NACA	NACA_ORENI;NACA	PUTATIVE NASCENT POLYPEPTIDE-ASSOCIATED COMPLEX SUBUNIT ALPHA, MUSCLE-SPECIFIC FORM-LIKE ISOFORM 1;HYPOTHETICAL PROTEIN;NACA	NACA_ORENI	NASCENT POLYPEPTIDE-ASSOCIATED COMPLEX SUBUNIT ALPHA;NACA
3979	PORTHOMCL3979[AjBfCgCiDrGgLvMmOjOlPsSpXl|(16 genes, 13 taxa)]:	-0.428901	-0.965978	-0.599286	-0.121029	-0.199975	-0.530647	-0.598519	0.712028	-0.847529	-0.355996	-0.16152	-0.474303	RPA2	RPA2	RPA2	RPA2.S;RPA2.L;RPA2	RPA2	RPA2	REPLICATION PROTEIN A 32 KDA SUBUNIT-A-LIKE, TRANSCRIPT VARIANT X1; REPLICATION PROTEIN A 32 KDA SUBUNIT-A-LIKE, TRANSCRIPT VARIANT X2	RPA2	RFA2_PONAB;RPA2	REPLICATION PROTEIN A2, 32KDA;RPA2	RFA2_HUMAN	REPLICATION PROTEIN A 32 KDA SUBUNIT-B-LIKE;REPLICATION PROTEIN A 32 KDA SUBUNIT-LIKE
1428	PORTHOMCL1428[AjBfCgCiDrGgMmOjOlPsSpXl|(25 genes, 12 taxa)]:	-0.71467	-0.458725	-0.473626	-0.423162	-0.224069	-0.550471	-0.591792	-0.780281	-0.322765	0	0.700368	-0.47412	XPNPEP1;XPNPEP2	XPNPEP1	XPNPEP1	XPNPEP1.L;XPNPEP1	XPNPEP1	XPNPEP1	XAA-PRO AMINOPEPTIDASE 1;XPNPEP2	XPNPEP1	XPP1_HUMAN;XPP2_HUMAN;XPNPEP1	PUTATIVE XAA-PRO AMINOPEPTIDASE 1 ISOFORM X1;HYPOTHETICAL PROTEIN;XPNPEP1		XAA-PRO AMINOPEPTIDASE 1, TRANSCRIPT VARIANT X4; XAA-PRO AMINOPEPTIDASE 1, TRANSCRIPT VARIANT X3; XAA-PRO AMINOPEPTIDASE 1, TRANSCRIPT VARIANT X2; XAA-PRO AMINOPEPTIDASE 1, TRANSCRIPT VARIANT X1;PROBABLE XAA-PRO AMINOPEPTIDASE P;XAA-PRO AMINOPEPTIDASE 1-LIKE, TRANSCRIPT VARIANT X2; XAA-PRO AMINOPEPTIDASE 1-LIKE, TRANSCRIPT VARIANT X1;XAA-PRO AMINOPEPTIDASE 1, TRANSCRIPT VARIANT X1; XAA-PRO AMINOP…
3778	PORTHOMCL3778[AjBfCgDrGgLvMmOjOlPsSpXl|(16 genes, 12 taxa)]:	-0.125879	-0.107165	-0.397747	-0.455294	-0.842353	-0.915765	0	0.304336	0.770147	0.637647	0.245221	-0.474034	RPL21	RPL21	RPL21;RPL21-PS4	MGC80700;RPL21.L;RPL21	RPL21	RPL21		RPL21	RL21_CHILA	PUTATIVE 60S RIBOSOMAL PROTEIN L21;RPL21	RL21_HUMAN;RPL21	RIBOSOMAL PROTEIN L21-LIKE, TRANSCRIPT VARIANT X1; RIBOSOMAL PROTEIN L21-LIKE;RPL21
9709	PORTHOMCL9709[BfCgCiDrGgMmOlPsXl|(9 genes, 9 taxa)]:	-0.331099	-0.880352	-0.530879	-0.147941	-0.747672	-0.204059	-0.749675	0.630369	0	0	0	-0.473667			APITD1	APITD1.L	CENPS	APITD1	CENTROMERE PROTEIN S-LIKE
5161	PORTHOMCL5161[AjBfCgCiDrGgLvMmOjOlPsSpXl|(14 genes, 13 taxa)]:	-0.591154	-0.564923	-0.58	-0.342892	-0.45402	-0.306294	-0.810571	-0.402106	0.268971	-0.848793	-0.587255	-0.473214	DDX51	DDX51	DDX51	DDX51.L;DDX51	DDX51	DDX51	ATP-DEPENDENT RNA HELICASE DDX51-LIKE;DDX51	DDX51	DDX51_DANRE;DDX51	PUTATIVE ATP-DEPENDENT RNA HELICASE DDX51;DDX51	DDX51_HUMAN;DDX51	ATP-DEPENDENT RNA HELICASE DDX51
5421	PORTHOMCL5421[AjBfCgCiDrGgLvMmOjOlPsSpXl|(14 genes, 13 taxa)]:	-0.741099	-0.380264	-0.621484	-0.712206	-0.341936	-0.0401765	-0.423571	0.677203	-0.769235	0.0203096	-0.366652	-0.472861	HDDC2	HDDC2	HDDC2	HDDC2.L;HDDC2	HDDC2	HDDC2	HD DOMAIN-CONTAINING PROTEIN 2-LIKE;HDDC2	HDDC2	HDDC2_XENLA	PUTATIVE HD DOMAIN-CONTAINING PROTEIN 2 ISOFORM 1;PUTATIVE HD DOMAIN-CONTAINING PROTEIN 2;HDDC2	HDDC2_XENLA;HDDC2	HD DOMAIN-CONTAINING PROTEIN 2-LIKE, TRANSCRIPT VARIANT X2; HD DOMAIN-CONTAINING PROTEIN 2-LIKE, TRANSCRIPT VARIANT X1;HDDC2
925	PORTHOMCL925[AjBfCgCiDrGgLvMmOjOlPsSpXl|(30 genes, 13 taxa)]:	-0.412363	-0.712659	-0.758516	-0.344338	-0.431176	-0.176	-0.0281039	-0.595773	-0.722029	-0.318762	-0.0871858	-0.472509	SMG1	SMG1	SMG1	LOC108703118;SMG1	SMG1	SMG1	SERINE/THREONINE-PROTEIN KINASE SMG1;SERINE/THREONINE-PROTEIN KINASE SMG1-LIKE	SMG1		PUTATIVE SERINE/THREONINE-PROTEIN KINASE SMG1;PUTATIVE SERINE/THREONINE-PROTEIN KINASE SMG1-LIKE;NONC	SMG1_HUMAN;SMG1_MOUSE	SERINE/THREONINE-PROTEIN KINASE SMG1;SERINE/THREONINE-PROTEIN KINASE SMG1-LIKE
4796	PORTHOMCL4796[AjBfCgCiDrGgLvMmOjOlPsSpXl|(15 genes, 13 taxa)]:	-0.69956	-0.51789	-0.708736	-0.824657	-0.0409804	-0.0425294	-0.462727	0.62049	0.279088	-0.80547	-0.761642	-0.472392	SMS	SMS	SMS	SMS.L;SMS	SMS	SMS	SPERMINE SYNTHASE-LIKE;SMS		TBA3_RAT;SMS	PUTATIVE SPERMINE SYNTHASE-LIKE	SPSY_BOVIN;SPSY_HUMAN;SMS	SPERMINE SYNTHASE;SMS
6036	PORTHOMCL6036[BfDrGgMmOjOlPsSpXl|(14 genes, 9 taxa)]:	-0.703132	-0.567324	-0.628104	-0.158551	-0.593971	-0.181417	0	-0.763026	0.410391	0	0.137094	-0.472083	FGF8	FGF8;FGF17	FGF17;FGF8	FGF8.L;LOC108697431;FGF8	FGF8A	FGF8A;FGF24;FGF17			FGF8_HUMAN			FIBROBLAST GROWTH FACTOR 18
10469	PORTHOMCL10469[CgCiDrGgMmOlPsXl|(8 genes, 8 taxa)]:	-0.526868	-0.565714	-0.526758	-0.287328	-0.552132	-0.372294	-0.653517	0	0	0	0	-0.471849	LLPH	LLPH	LLPH	LLPH.S;LLPH	LLPH	LLPH	PROTEIN LLP HOMOLOG;LLPH
5831	PORTHOMCL5831[AjBfCgCiDrGgLvMmOjOlPsSpXl|(14 genes, 13 taxa)]:	-0.0341758	-0.225978	-0.239615	-0.564853	-0.868407	-0.895059	0.826195	-0.899566	0.784618	0.0208256	0.338358	-0.471348	RPS15A	RPS15A	RPS15A	MGC114789;RPS15A.S;RPS15A	RPS15A	RPS15A	40S RIBOSOMAL PROTEIN S15AA, TRANSCRIPT VARIANT X2; 40S RIBOSOMAL PROTEIN S15AA, TRANSCRIPT VARIANT X4; 40S RIBOSOMAL PROTEIN S15AA, TRANSCRIPT VARIANT X3; 40S RIBOSOMAL PROTEIN S15AA, TRANSCRIPT VARIANT X1;RPS15A	RPS15A	RS15A_RAT;RPS15A	40S RIBOSOMAL PROTEIN;RPS15A	RS15A_STRPU;RPS15A	RIBOSOMAL PROTEIN S15A, TRANSCRIPT VARIANT X1; RIBOSOMAL PROTEIN S15A;RPS15A
13065	PORTHOMCL13065[DrGgMmOlPsXl|(6 genes, 6 taxa)]:	-0.525769	-0.73833	-0.757912	-0.317426	-0.118431	-0.368265	0	0	0	0	0	-0.471022	SETDB2	SETDB2	SETDB2	SETDB2.S;SETDB2	HISTONE-LYSINE N-METHYLTRANSFERASE SETDB2;SETDB2	CABZ01090029.1;SETDB2
6555	PORTHOMCL6555[AjBfCgCiDrGgMmOjOlPsSpXl|(13 genes, 12 taxa)]:	-0.105549	-0.729231	-0.546813	-0.339191	-0.573799	-0.517206	-0.336013	0.28021	0.669824	0	-0.64277	-0.468632	EIF3D	EIF3D	EIF3D	EIF3D.S;EIF3D	EIF3D	EIF3D	EUKARYOTIC TRANSLATION INITIATION FACTOR 3 SUBUNIT D-LIKE;EIF3D	EIF3D	EIF3D_BOVIN;EIF3D	PUTATIVE EUKARYOTIC TRANSLATION INITIATION FACTOR 3 SUBUNIT D		EUKARYOTIC TRANSLATION INITIATION FACTOR 3 SUBUNIT D;EIF3D
888	PORTHOMCL888[AjBfCgCiDrGgLvMmOlPsSpXl|(31 genes, 12 taxa)]:	-0.168242	-0.446813	-0.897747	-0.189265	-0.372745	-0.735176	-0.738039	-0.3974	0	-0.7471	-0.0474265	-0.468331	LRIG2;LRIG3	LRIG2;LRIG3	LRIG3;LRIG2	LOC108711112;LRIG3.S;LRIG3	LRIG3	LRIG1;LRIG3	LEUCINE-RICH REPEATS AND IMMUNOGLOBULIN-LIKE DOMAINS PROTEIN 3;PROTEIN SLIT-LIKE			HYPOTHETICAL PROTEIN;SLIT AND NTRK-LIKE PROTEIN 5;PUTATIVE CARBOXYPEPTIDASE N SUBUNIT 2-LIKE;LRIG2	LRIG3_HUMAN;LRIG3	LEUCINE-RICH REPEATS AND IMMUNOGLOBULIN-LIKE DOMAINS PROTEIN 3, TRANSCRIPT VARIANT X1; LEUCINE-RICH REPEATS AND IMMUNOGLOBULIN-LIKE DOMAINS PROTEIN 3, TRANSCRIPT VARIANT X2
4422	PORTHOMCL4422[AjBfCgCiDrGgLvMmOjOlPsSpXl|(15 genes, 13 taxa)]:	-0.0940659	-0.707604	-0.612527	-0.601201	-0.38299	-0.408176	-0.59461	-0.592517	0.813147	0.161837	-0.368505	-0.467761	PSMD5	PSMD5	PSMD5	PSMD5.L;PSMD5	PSMD5	PSMD5	26S PROTEASOME NON-ATPASE REGULATORY SUBUNIT 5	PSMD5	PSMD5_MACFA	PUTATIVE 26S PROTEASOME NON-ATPASE REGULATORY SUBUNIT 5-LIKE	PSMD5_HUMAN;PSMD5_BOVIN	26S PROTEASOME NON-ATPASE REGULATORY SUBUNIT 5
4264	PORTHOMCL4264[CgCiDrGgMmOlPsXl|(16 genes, 8 taxa)]:	-0.16467	-0.730022	-0.557967	-0.0959559	-0.538407	-0.717217	0.664091	0	0	0	0	-0.467373	CFL2;DSTN	CFL2;DSTN;CFL1	CFL2;DSTN;CFL1	CFL2.L;CFL1.S;CFL2	CFL1L;CFL2	CFL2	COFILIN
8167	PORTHOMCL8167[AjCgCiDrGgMmOjOlPsSpXl|(11 genes, 11 taxa)]:	-0.325604	-0.506242	-0.800165	-0.388431	-0.247132	-0.536294	-0.775494	0	-0.0727647	0	-0.512377	-0.467311	KDM5B	KDM5A	KDM5B	LOC108709501;KDM5B	KDM5BA	KDM5C	LYSINE-SPECIFIC DEMETHYLASE 5A, TRANSCRIPT VARIANT X1; LYSINE-SPECIFIC DEMETHYLASE 5A, TRANSCRIPT VARIANT X3; LYSINE-SPECIFIC DEMETHYLASE 5A, TRANSCRIPT VARIANT X2		KDM5A_MOUSE;KDM5A	PUTATIVE LYSINE-SPECIFIC DEMETHYLASE 5A-LIKE		LYSINE-SPECIFIC DEMETHYLASE 5A-LIKE
5688	PORTHOMCL5688[AjBfCgCiDrGgLvMmOjOlPsSpXl|(14 genes, 13 taxa)]:	-0.466209	-0.612923	-0.482088	-0.737451	-0.234167	-0.268706	-0.826325	0.153007	0.0826176	-0.500764	-0.301103	-0.466924	C1QBP	C1QBP	C1QBP	C1QBP.L;C1QBP.S;C1QBP	C1QBP	C1QBP	COMPLEMENT COMPONENT 1 Q SUBCOMPONENT-BINDING PROTEIN, MITOCHONDRIAL-LIKE		C1QBP_RAT	PUTATIVE COMPLEMENT COMPONENT 1 Q SUBCOMPONENT-BINDING PROTEIN, MITOCHONDRIAL-LIKE	C1QBP_BOVIN	COMPLEMENT COMPONENT 1 Q SUBCOMPONENT-BINDING PROTEIN, MITOCHONDRIAL
6462	PORTHOMCL6462[AjBfCiDrGgLvMmOjOlPsSpXl|(13 genes, 12 taxa)]:	-0.492473	-0.359429	-0.383626	-0.867279	-0.0769608	-0.616088	-0.71213	-0.161189	-0.0134412	0.170857	-0.666054	-0.465976	DAP3	DAP3	DAP3	DAP3.L;DAP3	DAP3	DAP3	28S RIBOSOMAL PROTEIN S29, MITOCHONDRIAL-LIKE	DAP3	RT29_MOUSE;DAP3	PUTATIVE 28S RIBOSOMAL PROTEIN S29, MITOCHONDRIAL;DAP3	RT29_BOVIN	28S RIBOSOMAL PROTEIN S29, MITOCHONDRIAL;DAP3
6536	PORTHOMCL6536[AjBfCgCiDrGgLvMmOjOlPsSpXl|(13 genes, 13 taxa)]:	-0.338077	-0.438989	-0.0740659	-0.933181	-0.88473	-0.126382	-0.798506	-0.0436713	0.385176	-0.73517	0.0988971	-0.465904	ASPH	ASPH	ASPH	ASPH.S	UNM_HU7910;ASPH	ASPH	ASPARTYL/ASPARAGINYL BETA-HYDROXYLASE-LIKE;ASPH	ASPH	ASPH_BOVIN;ASPH	ASPARTYL/ASPARAGINYL BETA-HYDROXYLASE;ASPH	ASPH_BOVIN	BROMODOMAIN-CONTAINING PROTEIN 4
3330	PORTHOMCL3330[AjBfCgCiDrGgLvMmOjOlPsSpXl|(17 genes, 13 taxa)]:	-0.0158242	-0.482286	-0.183132	-0.510417	-0.75076	-0.848059	-0.859532	-0.329161	-0.836824	-0.41614	-0.801961	-0.46508	UFL1	UFL1	UFL1	UFL1.L;UFL1	UFL1	UFL1	E3 UFM1-PROTEIN LIGASE 1;UFL1	UFL1	UFL1_MACFA;UFL1	PUTATIVE E3 UFM1-PROTEIN LIGASE 1;PUTATIVE E3 UFM1-PROTEIN LIGASE 1-LIKE;UFL1	UFL1_CHICK;UFL1	E3 UFM1-PROTEIN LIGASE 1;UFL1
1138	PORTHOMCL1138[AjBfCgCiDrGgMmOjOlPsXl|(28 genes, 11 taxa)]:	-0.0742308	-0.128989	-0.670495	-0.362574	-0.904877	-0.649294	0.80514	-0.478952	0.285382	0	0	-0.465076		HES1	HES1;HES3	HES1.S;HES1.L;HES3.L;HES1;HES3	HER6.2;HES1;HES4	HER6	TRANSCRIPTION FACTOR PROTEIN	HES4;HES1	HES4B_XENLA;HES1_CHICK	HAIRY AND ENHANCER OF SPLIT TRANSCRIPTION FACTOR C;HYPOTHETICAL PROTEIN;HESC
3093	PORTHOMCL3093[BfCgDrGgMmOjOlPsSpXl|(18 genes, 10 taxa)]:	-0.418956	-0.713626	-0.388571	-0.379951	-0.298555	-0.590765	0	0.353711	-0.496	0	-0.619118	-0.465071	ELOVL5;ELOVL2	ELOVL2;ELOVL5	ELOVL2;ELOVL5	ELOVL5.L;ELOVL5.S;ELOVL2.L;ELOVL5	ELOVL5	ELOVL5;ELOVL2		ELOVL5	ELOV5_BOVIN			ELONGATION OF VERY LONG CHAIN FATTY ACIDS PROTEIN 5, TRANSCRIPT VARIANT X3; ELONGATION OF VERY LONG CHAIN FATTY ACIDS PROTEIN 5, TRANSCRIPT VARIANT X2; ELONGATION OF VERY LONG CHAIN FATTY ACIDS PROTEIN 5, TRANSCRIPT VARIANT X1; ELONGATION OF VERY LONG CHAIN FATTY ACIDS PROTEIN 5, TRANSCRIPT VARIANT X4
4414	PORTHOMCL4414[AjBfCgCiDrGgLvMmOjOlPsSpXl|(15 genes, 13 taxa)]:	-0.366484	-0.398637	-0.557088	-0.868309	-0.503211	-0.0932059	-0.863948	-0.292238	0.120676	-0.561961	-0.30527	-0.464489	YARS	YARS	YARS	YARS.L;YARS.S;YARS	YARS	YARS	TYROSINE--TRNA LIGASE, CYTOPLASMIC;YARS		SYYC_XENLA;YARS	PUTATIVE TYROSINE--TRNA LIGASE, CYTOPLASMIC;YARS	SYYC_XENTR;YARS	TYROSINE--TRNA LIGASE, CYTOPLASMIC;YARS
2478	PORTHOMCL2478[AjBfCgCiDrGgLvMmOjOlPsSpXl|(19 genes, 13 taxa)]:	-0.458791	-0.749011	-0.496648	-0.45973	-0.237574	-0.374941	-0.798026	0.288322	-0.833735	-0.783674	-0.731863	-0.462783	NLE1	NLE1;TBL1X	NLE1	NLE1.S;NLE1	NLE1	NLE1	NOTCHLESS PROTEIN HOMOLOG 1;NLE1		NLE1_XENLA;NLE1	HYPOTHETICAL PROTEIN;PUTATIVE NOTCHLESS PROTEIN-LIKE 1-LIKE;NLE1	NLE1_BOVIN;NLE1_MOUSE	NOTCHLESS PROTEIN HOMOLOG 1;NOTCHLESS PROTEIN HOMOLOG 1-LIKE;NLE1
6426	PORTHOMCL6426[AjBfCgCiDrGgLvMmOjOlPsSpXl|(13 genes, 13 taxa)]:	-0.461264	-0.900352	-0.564121	-0.103113	-0.552598	-0.193706	0.174104	-0.693497	0.289441	-0.230815	-0.648529	-0.462525	EXOSC9	EXOSC9	EXOSC9	EXOSC9.L;EXOSC9	EXOSC9	EXOSC9	EXOSOME COMPLEX COMPONENT RRP45	EXOSC9	EXOS9_BOVIN	HYPOTHETICAL PROTEIN;EXOSC9	EXOS9_HUMAN;EXOSC9	EXOSOME COMPLEX COMPONENT RRP45;EXOSC9
6394	PORTHOMCL6394[AjBfCgCiDrGgMmOjOlPsSpXl|(13 genes, 12 taxa)]:	-0.495	-0.683956	-0.546648	-0.265245	-0.548284	-0.232294	-0.691091	-0.902851	-0.843647	0	-0.660294	-0.461905	RSL1D1	RSL1D1	RSL1D1	LOC733385;RSL1D1.L;RSL1D1	RSL1D1	RSL1D1	RIBOSOMAL L1 DOMAIN-CONTAINING PROTEIN 1-LIKE		RL1D1_MOUSE	PUTATIVE RIBOSOMAL L1 DOMAIN-CONTAINING PROTEIN 1		RIBOSOMAL L1 DOMAIN-CONTAINING PROTEIN 1
3771	PORTHOMCL3771[AjBfCgCiDrGgLvMmOjOlPsSpXl|(16 genes, 13 taxa)]:	-0.450824	-0.610725	-0.533626	-0.326544	-0.686691	-0.161794	-0.508429	-0.817851	-0.4855	-0.746151	-0.606127	-0.461701	SEC13	SEC13	SEC13	LOC108714639	SEC13	SEC13	PROTEIN SEC13 HOMOLOG;SEC13	SEC13	SEC13_HUMAN;SEC13	HYPOTHETICAL PROTEIN;PUTATIVE TRIPARTITE MOTIF-CONTAINING PROTEIN 2-LIKE;SEC13	SEC13_RAT;SEC13	PROTEIN SEC13 HOMOLOG;SEC13
3850	PORTHOMCL3850[AjBfCgCiDrGgLvMmOjOlPsSpXl|(16 genes, 13 taxa)]:	-0.363846	-0.819692	-0.645275	-0.737843	-0.0879657	-0.113235	-0.902156	-0.419529	0.471206	-0.466226	-0.612377	-0.46131	IPO11	IPO11	IPO11	IPO11.S;IPO11	IPO11	IPO11	IMPORTIN-11-LIKE	IPO11	IPO11_HUMAN;IPO11	PUTATIVE IMPORTIN-11	IPO11_HUMAN;IPO11_MOUSE;IPO11	IMPORTIN-11, TRANSCRIPT VARIANT X1; IMPORTIN-11, TRANSCRIPT VARIANT X2;IPO11
5041	PORTHOMCL5041[AjCiDrGgLvMmOjOlPsSpXl|(15 genes, 11 taxa)]:	-0.507527	-0.588571	-0.621044	-0.119608	-0.0363725	-0.890412	0.551792	0	0.277088	0.0578535	-0.766422	-0.460589	AGK	AGK	AGK	AGK.S;LOC108704355;AGK	AGK	AGK	ACYLGLYCEROL KINASE, MITOCHONDRIAL-LIKE		AGK_PONAB;AGK	PUTATIVE ACYLGLYCEROL KINASE, MITOCHONDRIAL;LOC101334760	AGK_XENLA	ACYLGLYCEROL KINASE, MITOCHONDRIAL;AGK
4515	PORTHOMCL4515[AjBfCgCiDrGgLvMmOlPsSpXl|(15 genes, 12 taxa)]:	-0.0950549	-0.182198	-0.363736	-0.481422	-0.752353	-0.885029	0.806169	-0.078079	0	0.628937	0.424387	-0.459965	RPL32	RPL32	RPL32	RPL32.L;LOC108715857	RPL32	RPL32	RL32 PROTEIN;RPL32			RIBOSOMAL PROTEIN L32E	RL32_RAT	60S RIBOSOMAL PROTEIN L32;RPL32
4689	PORTHOMCL4689[AjBfCgCiDrGgLvMmOjOlPsSpXl|(15 genes, 13 taxa)]:	-0.428736	-0.554505	-0.522912	-0.367692	-0.301275	-0.577588	0.0767403	0.353566	-0.469559	-0.7013	-0.66299	-0.458785	INTS4	INTS4	INTS4	XELAEV18013888M;LOC108705943	INTS4	INTS4	INTEGRATOR COMPLEX SUBUNIT 4	INTS4	INT4_HUMAN;INTS4	PUTATIVE INTEGRATOR COMPLEX SUBUNIT 4;INTS4	INT4_HUMAN;INTS4	INTEGRATOR COMPLEX SUBUNIT 4, TRANSCRIPT VARIANT X1; INTEGRATOR COMPLEX SUBUNIT 4, TRANSCRIPT VARIANT X2;INTS4
3852	PORTHOMCL3852[AjBfCgCiDrGgLvMmOjOlPsSpXl|(16 genes, 13 taxa)]:	-0.414725	-0.313011	-0.801209	-0.518113	-0.195833	-0.507676	0.13826	-0.826786	0.447118	-0.235975	0.234559	-0.458428	EXOC2	EXOC2	EXOC2	EXOC2.L;EXOC2	EXOC2	EXOC2	EXOCYST COMPLEX COMPONENT 2;EXOC2	EXOC2	EXOC2_HUMAN;EXOC2	PUTATIVE EXOCYST COMPLEX COMPONENT 2;EXOC2	EXOC2_HUMAN	EXOCYST COMPLEX COMPONENT 2
6582	PORTHOMCL6582[AjBfCgCiDrGgLvMmOjOlPsSpXl|(13 genes, 13 taxa)]:	-0.33456	-0.593846	-0.549725	-0.558333	-0.609632	-0.1025	-0.667312	0.363566	-0.7835	0.322208	0.0651961	-0.4581	HYOU1	HYOU1	HYOU1	HYOU1.L;HYOU1	HYOU1	HYOU1	HYPOXIA UP-REGULATED PROTEIN 1-LIKE, TRANSCRIPT VARIANT X2; HYPOXIA UP-REGULATED PROTEIN 1-LIKE, TRANSCRIPT VARIANT X1;HYOU1	HYOU1	HYOU1_XENTR	HYOU1 PROTEIN;HYOU1	HYOU1_DANRE;HYOU1	HYPOXIA UP-REGULATED PROTEIN 1;HYOU1
8483	PORTHOMCL8483[AjBfCgCiDrGgMmOlPsXl|(10 genes, 10 taxa)]:	-0.446264	-0.524703	-0.491593	-0.164167	-0.600662	-0.52	-0.871117	-0.0622242	0	0	0	-0.457898	ATAD3A	ATAD3A	ATAD3A	ATAD3A.S;ATAD3A	ATAD3A	ATAD3B	ATPASE FAMILY AAA DOMAIN-CONTAINING PROTEIN 3-LIKE;ATAD3A	ATAD3A		HYPOTHETICAL PROTEIN;ATAD3A
3199	PORTHOMCL3199[AjBfCgCiDrGgLvMmOjOlPsSpXl|(17 genes, 13 taxa)]:	-0.166758	-0.558374	-0.551758	-0.351985	-0.594093	-0.522382	-0.183961	-0.0381818	-0.705235	-0.44516	-0.385049	-0.457558	EIF3L	EIF3L	EIF3L	EIF3L.S;EIF3L.L;EIF3L	EIF3S6IP;EIF3L	EIF3S6IP;EIF3L	EUKARYOTIC TRANSLATION INITIATION FACTOR 3 SUBUNIT L-LIKE;EIF3L	EIF3L	EIF3L_DANRE;EIF3L	PUTATIVE EUKARYOTIC TRANSLATION INITIATION FACTOR 3 SUBUNIT L;PUTATIVE EUKARYOTIC TRANSLATION INITIATION FACTOR 3 SUBUNIT L ISOFORM X1;EIF3L	EIF3L_BOVIN;EIF3L	EUKARYOTIC TRANSLATION INITIATION FACTOR 3 SUBUNIT L;EIF3L
1200	PORTHOMCL1200[AjBfCgCiDrGgLvMmOjOlPsSpXl|(27 genes, 13 taxa)]:	-0.303242	-0.498681	-0.534945	-0.612442	-0.583873	-0.207324	-0.854143	-0.693257	0	-0.311714	-0.462265	-0.456751	DNMT3B;DNMT3A	DNMT3B;DNMT3L	DNMT3A;DNMT3B;DNMT3L	LOC108701970;LOC108716062;LOC108718324;DNMT3A	DNMT3AA;DNMT3BB.1;DNMT3BA;DNMT3BB.2	DNMT3BA;DNMT3AB;DNMT3AA;DNMT3BB.1;DNMT3BB.3;DNMT3A;DNMT3B	DNA (CYTOSINE-5)-METHYLTRANSFERASE 3A-LIKE;DNA (CYTOSINE-5)-METHYLTRANSFERASE 3A-LIKE, TRANSCRIPT VARIANT X1; DNA (CYTOSINE-5)-METHYLTRANSFERASE 3A-LIKE, TRANSCRIPT VARIANT X2		DNM3A_CHICK	PUTATIVE DNA (CYTOSINE-5)-METHYLTRANSFERASE 3B ISOFORM X8	DNM3B_MOUSE	DNA (CYTOSINE-5)-METHYLTRANSFERASE 3A
5472	PORTHOMCL5472[AjBfCgCiDrGgLvMmOjOlPsSpXl|(14 genes, 13 taxa)]:	-0.345934	-0.848835	-0.573901	-0.178015	-0.54424	-0.249529	0.110584	-0.837349	-0.778971	-0.642828	-0.602206	-0.456742	INTS8	INTS8	INTS8	INTS8.S;INTS8	INTS8	INTS8	INTEGRATOR COMPLEX SUBUNIT 8-LIKE	INTS8	INT8_HUMAN	PUTATIVE INTEGRATOR COMPLEX SUBUNIT 8 ISOFORM X2	INT8_XENLA	INTEGRATOR COMPLEX SUBUNIT 8, TRANSCRIPT VARIANT X1; INTEGRATOR COMPLEX SUBUNIT 8, TRANSCRIPT VARIANT X2
4036	PORTHOMCL4036[AjBfCgCiDrGgLvMmOjOlPsSpXl|(16 genes, 13 taxa)]:	-0.203791	-0.330505	-0.566978	-0.599191	-0.286348	-0.752647	-0.873584	-0.774653	-0.852265	-0.74419	0.092402	-0.456577	LIAS	LIAS	LIAS	LIAS.S;LIAS.L	LIAS	LIAS	LIPOYL SYNTHASE, MITOCHONDRIAL-LIKE, TRANSCRIPT VARIANT X3; LIPOYL SYNTHASE, MITOCHONDRIAL-LIKE, TRANSCRIPT VARIANT X1; LIPOYL SYNTHASE, MITOCHONDRIAL-LIKE, TRANSCRIPT VARIANT X2;LIAS	LIAS	LIAS_BOVIN;LIAS	PUTATIVE LIPOYL SYNTHASE, MITOCHONDRIAL;LIAS	LIAS_BRAFL;LIAS	LIPOYL SYNTHASE, MITOCHONDRIAL;LIAS
4205	PORTHOMCL4205[AjCgCiDrGgLvMmOjOlPsSpXl|(16 genes, 12 taxa)]:	-0.350165	-0.51556	-0.442418	-0.471789	-0.530417	-0.424971	-0.430196	0	-0.667735	-0.550568	-0.332721	-0.455887	GPATCH1	GPATCH1	GPATCH1	GPATCH1.L;GPATCH1	GPATCH1	GPATCH1	G PATCH DOMAIN-CONTAINING PROTEIN 1-LIKE;LOC100184230		GPTC1_BOVIN	PUTATIVE G PATCH DOMAIN-CONTAINING PROTEIN 1-LIKE;PUTATIVE G PATCH DOMAIN-CONTAINING PROTEIN 1-LIKE ISOFORM X2	GPTC1_HUMAN	G PATCH DOMAIN-CONTAINING PROTEIN 1;G PATCH DOMAIN-CONTAINING PROTEIN 1-LIKE
5965	PORTHOMCL5965[AjBfCiDrGgLvMmOjOlPsSpXl|(14 genes, 12 taxa)]:	-0.63478	-0.935077	-0.608626	-0.391324	-0.0867647	-0.0774412	-0.402416	-0.597776	-0.667765	-0.398452	-0.20576	-0.455669	TACC3	TACC3	TACC3	TACC3.L;TACC3.S;TACC3		TACC3	TRANSFORMING ACIDIC COILED-COIL-CONTAINING PROTEIN 3		TACC3_XENLA	PUTATIVE TRANSFORMING ACIDIC COILED-COIL-CONTAINING PROTEIN 3 ISOFORM X4	TACC3_XENLA	TRANSFORMING ACIDIC COILED-COIL-CONTAINING PROTEIN 3, TRANSCRIPT VARIANT X1; TRANSFORMING ACIDIC COILED-COIL-CONTAINING PROTEIN 3, TRANSCRIPT VARIANT X4; TRANSFORMING ACIDIC COILED-COIL-CONTAINING PROTEIN 3, TRANSCRIPT VARIANT X2; TRANSFORMING ACIDIC COILED-COIL-CONTAINING PROTEIN 3, TRANSCRIPT VARIANT X3
2511	PORTHOMCL2511[AjBfCgCiDrGgLvMmOjOlPsSpXl|(19 genes, 13 taxa)]:	-0.471484	-0.550857	-0.525879	-0.143627	-0.631176	-0.4085	-0.704571	0.139381	-0.808412	-0.86743	-0.572917	-0.455254	MYBBP1A	MYBBP1A	MYBBP1A	MYBBP1A.L;MYBBP1A	MYBBP1A	MYBBP1A	MYB-BINDING PROTEIN 1A-LIKE PROTEIN		MBB1A_HUMAN;DPO5_SCHPO	PUTATIVE MYB-BINDING PROTEIN 1A-LIKE PROTEIN;PUTATIVE MYB-BINDING PROTEIN 1A-LIKE PROTEIN-LIKE	MBB1A_MOUSE	MYB-BINDING PROTEIN 1A-LIKE PROTEIN
6288	PORTHOMCL6288[AjBfCgDrGgMmOjOlPsSpXl|(13 genes, 11 taxa)]:	-0.446264	-0.849407	-0.550275	-0.234681	-0.42799	-0.220029	0	-0.461056	-0.870824	0	-0.492279	-0.454774	GATAD2A	GATAD2A	GATAD2A	LOC100158394;GATAD2A.L;GATAD2A	GATAD2AB;TRANSCRIPTIONAL REPRESSOR P66-ALPHA	GATAD2AB;GATAD2A		GATAD2B	P66A_HUMAN	PUTATIVE TRANSCRIPTIONAL REPRESSOR P66-BETA ISOFORM X1		TRANSCRIPTIONAL REPRESSOR P66-BETA, TRANSCRIPT VARIANT X1; TRANSCRIPTIONAL REPRESSOR P66-BETA, TRANSCRIPT VARIANT X2
3463	PORTHOMCL3463[AjBfCgCiDrGgLvMmOjOlPsSpXl|(17 genes, 13 taxa)]:	-0.536484	-0.836703	-0.580549	-0.408039	-0.201887	-0.164735	-0.755286	0.453846	-0.781794	0.207534	0.117525	-0.454733	CWC27	CWC27	CWC27	CWC27.S;CWC27	CWC27	CWC27	PEPTIDYL-PROLYL CIS-TRANS ISOMERASE CWC27 HOMOLOG;CWC27	CWC27	CWC27_HUMAN;CWC27	PUTATIVE PEPTIDYL-PROLYL CIS-TRANS ISOMERASE CWC27-LIKE;HYPOTHETICAL PROTEIN;CWC27	CWC27_HUMAN;CWC27_XENLA;CWC27_BOVIN;CWC27	PEPTIDYL-PROLYL CIS-TRANS ISOMERASE CWC27 HOMOLOG;CWC27
4097	PORTHOMCL4097[AjBfCgCiDrGgLvMmOjOlPsSpXl|(16 genes, 13 taxa)]:	-0.104835	-0.823077	-0.383022	-0.295588	-0.501078	-0.619382	-0.78961	-0.46846	0.577529	0.221032	0.201103	-0.454497	PARS2	TARSL2;TARS2	PARS2	PARS2.L;PARS2	PARS2	PARS2	PROBABLE PROLINE--TRNA LIGASE, MITOCHONDRIAL;PARS2	PARS2	SYPM_RAT;PARS2	PUTATIVE PROLINE--TRNA LIGASE, MITOCHONDRIAL;PARS2	SYPM_RAT	PROBABLE PROLINE--TRNA LIGASE, MITOCHONDRIAL;PROBABLE PROLINE--TRNA LIGASE, MITOCHONDRIAL, TRANSCRIPT VARIANT X1;PARS2
945	PORTHOMCL945[AjBfCgCiDrGgLvMmOjOlPsSpXl|(30 genes, 13 taxa)]:	-0.335934	-0.643209	-0.592418	-0.480245	-0.347672	-0.324676	-0.629857	-0.877272	-0.181941	-0.756078	0.0194853	-0.454026	EIF4G1;EIF4G3	EIF4G3	EIF4G3;EIF4G1	EIF4G1.S;LOC108696834;EIF4G1.L;EIF4G1	EUKARYOTIC TRANSLATION INITIATION FACTOR 4 GAMMA 1;EIF4G1;EIF4G3A;EIF4G3	CABZ01085052.1;EIF4G3A;EIF4G3B;EIF4G1A;EIF4G1	EUKARYOTIC TRANSLATION INITIATION FACTOR 4 GAMMA 3		IF4G1_HUMAN	PUTATIVE EUKARYOTIC TRANSLATION INITIATION FACTOR 4 GAMMA 1;EUKARYOTIC INITIATION FACTOR 4G;PUTATIVE EUKARYOTIC TRANSLATION INITIATION FACTOR 4 GAMMA 3-LIKE	IF4G3_HUMAN	EUKARYOTIC TRANSLATION INITIATION FACTOR 4 GAMMA 1
4724	PORTHOMCL4724[AjBfCgCiDrGgLvMmOjOlPsSpXl|(15 genes, 13 taxa)]:	-0.319231	-0.533934	-0.561648	-0.0829902	-0.531078	-0.694412	-0.157377	-0.744685	0.0136176	-0.58291	-0.650735	-0.453882	UGGT1	UGGT1	UGGT1	UGGT1-LIKE.L;UGGT1	UGGT1	UGGT1	UDP-GLUCOSE:GLYCOPROTEIN GLUCOSYLTRANSFERASE 1, TRANSCRIPT VARIANT X2; UDP-GLUCOSE:GLYCOPROTEIN GLUCOSYLTRANSFERASE 1, TRANSCRIPT VARIANT X3; UDP-GLUCOSE:GLYCOPROTEIN GLUCOSYLTRANSFERASE 1, TRANSCRIPT VARIANT X1;UGGT1	UGGT1	UGGG1_MOUSE;UGGT1	PUTATIVE UDP-GLUCOSE:GLYCOPROTEIN GLUCOSYLTRANSFERASE 1;PUTATIVE UDP-GLUCOSE:GLYCOPROTEIN GLUCOSYLTRANSFERASE 1-LIKE	UGGG1_MOUSE	UDP-GLUCOSE:GLYCOPROTEIN GLUCOSYLTRANSFERASE 1
3596	PORTHOMCL3596[AjCgCiDrGgLvMmOjOlPsSpXl|(17 genes, 12 taxa)]:	-0.402857	-0.552	-0.520055	-0.0285539	-0.287181	-0.932529	-0.438221	0	-0.369588	-0.182734	-0.0290441	-0.453863	ACP1	ACP1	ACP1	ACP1.L;ACP1.S;ACP1	ACID PHOSPHATASE 1;ACP1	ACP1	LOW MOLECULAR WEIGHT PHOSPHOTYROSINE PROTEIN PHOSPHATASE-LIKE		PPAC_CHICK;PPAC_HUMAN	PUTATIVE LOW MOLECULAR WEIGHT PHOSPHOTYROSINE PROTEIN PHOSPHATASE ISOFORM X1	FUT6_HUMAN	LOW MOLECULAR WEIGHT PHOSPHOTYROSINE PROTEIN PHOSPHATASE, TRANSCRIPT VARIANT X1; LOW MOLECULAR WEIGHT PHOSPHOTYROSINE PROTEIN PHOSPHATASE, TRANSCRIPT VARIANT X2
3275	PORTHOMCL3275[AjCgCiDrGgLvMmOjOlPsSpXl|(17 genes, 12 taxa)]:	-0.118791	-0.738945	-0.382253	-0.220809	-0.729882	-0.528824	-0.826519	0	-0.666176	-0.734283	-0.361152	-0.453251	CDK6	CDK6	CDK6	CDK6.S;CDK6.L;CDK6;CDK4	CDK6;CDK21	CDK6;CDK21;CDK4	CYCLIN-DEPENDENT KINASE D-3		CDK4_XENLA;CDK6	PUTATIVE CYCLIN-DEPENDENT KINASE 6-LIKE	CDK4_MOUSE;CDK4	CYCLIN-DEPENDENT KINASE 4; CYCLIN-DEPENDENT KINASE 4, TRANSCRIPT VARIANT X1;CDK4
8421	PORTHOMCL8421[CgCiDrGgMmOjOlPsSpXl|(11 genes, 10 taxa)]:	-0.143901	-0.54989	-0.345165	-0.254485	-0.712255	-0.712382	-0.907182	0	-0.673676	0	-0.389583	-0.453013	UFM1	UFM1	UFM1	UFM1.S;UFM1.L;UFM1	UFM1	UFM1	UBIQUITIN-FOLD MODIFIER 1;UFM1		UFM1_AEDAE			UBIQUITIN-FOLD MODIFIER 1, TRANSCRIPT VARIANT X2; UBIQUITIN-FOLD MODIFIER 1, TRANSCRIPT VARIANT X1;UFM1
3494	PORTHOMCL3494[BfCgCiDrGgLvMmOjOlPsSpXl|(17 genes, 12 taxa)]:	-0.0447802	-0.359033	-0.633571	-0.84073	-0.763782	-0.0744776	0.0625852	-0.465732	0.184392	-0.511951	-0.138075	-0.452729	FJX1	FJX1	FJX1	FJX1.S;FJX1.L;FJX1	FJX1	FJX1	FOUR-JOINTED BOX PROTEIN 1-LIKE	FJX1	FJX1_XIPMA		FJX1_XIPMA	FOUR-JOINTED BOX PROTEIN 1-LIKE, TRANSCRIPT VARIANT X1; FOUR-JOINTED BOX PROTEIN 1-LIKE, TRANSCRIPT VARIANT X2
10628	PORTHOMCL10628[DrGgMmOjOlPsXl|(8 genes, 7 taxa)]:	-0.0163736	-0.223736	-0.777473	-0.849487	-0.268296	-0.580304	0	0	-0.634382	0	0	-0.452612	TOX2	TOX2	TOX2	LOC108702775;TOX2	THYMOCYTE SELECTION-ASSOCIATED HIGH MOBILITY GROUP BOX PROTEIN TOX;TOX2	TOX2			TOX3_HUMAN
6376	PORTHOMCL6376[AjBfCgCiDrGgMmOlPsSpXl|(13 genes, 11 taxa)]:	-0.313077	-0.691604	-0.757088	-0.294289	-0.291912	-0.367147	-0.666696	-0.842587	0	0	0.197591	-0.45252	SRRD	SRRD	SRRD	SRRD.L;SRRD	SRRD	SRRD	SRR1-LIKE PROTEIN	SRRD		PUTATIVE SRR1-LIKE PROTEIN-LIKE;SRRD		SRR1-LIKE PROTEIN;SRRD
5657	PORTHOMCL5657[AjBfCgCiDrGgLvMmOjOlPsSpXl|(14 genes, 13 taxa)]:	-0.193901	-0.925319	-0.258352	-0.0845098	-0.666985	-0.584088	-0.819065	-0.687413	-0.0964412	0.527258	-0.109314	-0.452192	CRYZL1	CRYZL1	CRYZL1	CRYZL1.L;CRYZL1	CRYZL1	CRYZL1	QUINONE OXIDOREDUCTASE-LIKE PROTEIN 1		PKS1_DICDI	PUTATIVE QUINONE OXIDOREDUCTASE-LIKE PROTEIN 1 ISOFORM X2;HYPOTHETICAL PROTEIN;CRYZL1	QORL1_BOVIN;CRYZL1	QUINONE OXIDOREDUCTASE-LIKE PROTEIN 1, TRANSCRIPT VARIANT X2; QUINONE OXIDOREDUCTASE-LIKE PROTEIN 1, TRANSCRIPT VARIANT X1;CRYZL1
2813	PORTHOMCL2813[AjBfCgCiDrGgLvMmOjOlPsSpXl|(18 genes, 13 taxa)]:	-0.47011	-0.789055	-0.551813	-0.214191	-0.459632	-0.225265	-0.765727	-0.440909	-0.7285	-0.512033	-0.684191	-0.451678	RIOK1	RIOK1	RIOK1	LOC108720060;RIOK1.L;RIOK1	RIOK1	RIOK1	SERINE/THREONINE-PROTEIN KINASE RIO1-LIKE;RIOK1	RIOK1	RIOK1_HUMAN;RIOK1	PUTATIVE SERINE/THREONINE-PROTEIN KINASE RIO1;RIOK1	RIOK1_HUMAN;RIOK1	SERINE/THREONINE-PROTEIN KINASE RIO1;RIOK1
1409	PORTHOMCL1409[AjBfCgCiDrGgLvMmOjOlPsSpXl|(25 genes, 13 taxa)]:	-0.422473	-0.132527	-0.540824	-0.229657	-0.814363	-0.568941	-0.839494	-0.686364	0.0168235	0.139608	-0.0770833	-0.451464	IMPDH	IMPDH2	IMPDH2;IMPDH1	IMPDH2.S;IMPDH1.L;LOC108713018;IMPDH2.L;IMPDH2;IMPDH	IMPDH2;IMPDH1B;IMPDH1A;IMPDH	IMPDH2;IMPDH1A;IMPDH1B;IMPDH	INOSINE-5'-MONOPHOSPHATE DEHYDROGENASE 2, TRANSCRIPT VARIANT X1; INOSINE-5'-MONOPHOSPHATE DEHYDROGENASE 2, TRANSCRIPT VARIANT X2; INOSINE-5'-MONOPHOSPHATE DEHYDROGENASE 2, TRANSCRIPT VARIANT X3;IMPDH		IMDH1_DANRE	PUTATIVE INOSINE-5'-MONOPHOSPHATE DEHYDROGENASE 1B ISOFORM X4;PUTATIVE INOSINE-5'-MONOPHOSPHATE DEHYDROGENASE 1B ISOFORM X2	IMDH1_DANRE	INOSINE-5'-MONOPHOSPHATE DEHYDROGENASE 1B, TRANSCRIPT VARIANT X4; INOSINE-5'-MONOPHOSPHATE DEHYDROGENASE 1B, TRANSCRIPT VARIANT X2; INOSINE-5'-MONOPHOSPHATE DEHYDROGENASE 1B, TRANSCRIPT VARIANT X3; INOSINE-5'-MONOPHOSPHATE DEHYDROGENASE 1B, TRANSCRIPT VARIANT X1
12885	PORTHOMCL12885[DrGgMmOlPsXl|(6 genes, 6 taxa)]:	-0.407857	-0.495385	-0.511758	-0.536569	-0.353015	-0.403952	0	0	0	0	0	-0.451423	SURF6	SURF6	SURF6	SURF6.L;SURF6	SURF6	SURF6
3022	PORTHOMCL3022[AjBfCgCiDrGgLvMmOjOlPsSpXl|(18 genes, 13 taxa)]:	-0.229231	-0.587253	-0.449011	-0.401642	-0.493309	-0.547971	-0.770571	-0.249301	-0.743059	-0.286295	-0.283211	-0.451403	PSMD11	PSMD11	PSMD11	PSMD11.S;PSMD11.L;PSMD11	PSMD11B;26S PROTEASOME NON-ATPASE REGULATORY SUBUNIT 11A	PSMD11A;PSMD11B;PSMD11	26S PROTEASOME NON-ATPASE REGULATORY SUBUNIT 11;PSMD11	PSMD11	PSD11_MOUSE	PUTATIVE 26S PROTEASOME NON-ATPASE REGULATORY SUBUNIT 11-LIKE	PSD11_XENTR;PSMD11	26S PROTEASOME NON-ATPASE REGULATORY SUBUNIT 11-LIKE;PSMD11
1165	PORTHOMCL1165[AjBfCgCiDrGgLvMmOjOlPsSpXl|(27 genes, 13 taxa)]:	-0.460714	-0.503429	-0.38478	-0.500784	-0.460931	-0.392853	-0.244039	-0.771189	0.293324	0.601135	-0.152083	-0.450582	CALR;CALR3	CALR;CALR3	CALR;CALR3;CALR4	CALR;CALR.L;CALR3.L	CALRETICULIN;CALR3B;CALR	CALR3A;CALR;CALR3B	CALRETICULIN;CALR		CALR_HUMAN;CALR	PUTATIVE CALRETICULIN-LIKE ISOFORM X2;HYPOTHETICAL PROTEIN	CALR_RABIT	CALRETICULIN
3858	PORTHOMCL3858[AjBfCgCiDrGgLvMmOjOlPsSpXl|(16 genes, 13 taxa)]:	-0.391923	-0.565099	-0.533681	-0.440147	-0.475343	-0.291353	-0.784338	-0.206643	-0.4065	-0.697503	-0.730882	-0.449591	POLR1A	POLR1A	POLR1A	POLR1A.L;POLR1A	POLR1A	POLR1A	DNA-DIRECTED RNA POLYMERASE I SUBUNIT RPA1-LIKE;POLR1A	POLR1A	RPA1_MOUSE	PUTATIVE DNA-DIRECTED RNA POLYMERASE I SUBUNIT RPA1	RPB1_HUMAN;POLR2A	DNA-DIRECTED RNA POLYMERASE I SUBUNIT RPA1;POLR1A
5418	PORTHOMCL5418[AjBfCgCiDrGgLvMmOjOlPsSpXl|(14 genes, 13 taxa)]:	-0.66956	-0.508396	-0.0979121	-0.489926	-0.403627	-0.524559	-0.927039	-0.266993	0.186676	0.186295	-0.716422	-0.448997	TPRKB	TPRKB	TPRKB	TPRKB.S;TPRKB.L;TPRKB	TPRKB	TPRKB	EKC/KEOPS COMPLEX SUBUNIT TPRKB-LIKE		TPRKB_MOUSE	TP53RK-BINDING PROTEIN	TPRKB_HUMAN	EKC/KEOPS COMPLEX SUBUNIT TPRKB
4191	PORTHOMCL4191[AjBfCgCiDrGgLvMmOjOlPsSpXl|(16 genes, 13 taxa)]:	-0.392747	-0.788176	-0.560659	-0.154069	-0.617745	-0.180178	-0.913766	0.105175	-0.886441	-0.760495	-0.703064	-0.448929	RAD51A;RAD51	RAD51	RAD51	RAD51.L	RAD51	RAD51	DNA REPAIR PROTEIN RAD51 HOMOLOG 1-LIKE;RAD51	RAD51	RA51B_XENLA	PUTATIVE DNA REPAIR PROTEIN;RAD51	RAD51_CRIGR;RA51A_XENLA	DNA REPAIR PROTEIN RAD51 HOMOLOG 1, TRANSCRIPT VARIANT X1;RAD51
5413	PORTHOMCL5413[AjBfCgCiDrGgMmOjOlPsSpXl|(14 genes, 12 taxa)]:	-0.534121	-0.73811	-0.551209	-0.473922	-0.394289	-0.000352941	-0.875	-0.878964	-0.748441	0	-0.566299	-0.448667	NOL8	NOL8	NOL8	NOL8.L	NOL8	NOL8	NUCLEOLAR PROTEIN 8-LIKE		NOL8_MOUSE	HYPOTHETICAL PROTEIN		NUCLEOLAR PROTEIN 8-LIKE
3409	PORTHOMCL3409[AjBfCgCiDrGgLvMmOjOlPsSpXl|(17 genes, 13 taxa)]:	-0.139699	-0.867253	-0.811209	-0.208971	-0.0775732	-0.585229	-0.0383896	-0.250919	-0.402382	-0.345243	-0.233211	-0.448322	WDR78	WDR78	WDR78	WDR78.S;WDR78	WDR78;WD REPEAT-CONTAINING PROTEIN 78	WDR78	WD REPEAT-CONTAINING PROTEIN 78;WDR78	WDR78	WDR78_HUMAN;WDR78_RAT	PUTATIVE WD REPEAT-CONTAINING PROTEIN 78;WDR78	WDR78_RAT;WDR78	WD REPEAT-CONTAINING PROTEIN 78, TRANSCRIPT VARIANT X1; WD REPEAT-CONTAINING PROTEIN 78, TRANSCRIPT VARIANT X4; WD REPEAT-CONTAINING PROTEIN 78, TRANSCRIPT VARIANT X3; WD REPEAT-CONTAINING PROTEIN 78, TRANSCRIPT VARIANT X2;WD REPEAT-CONTAINING PROTEIN 78;WDR78
4662	PORTHOMCL4662[AjBfCgCiDrGgMmOjOlPsSpXl|(15 genes, 12 taxa)]:	-0.451813	-0.631385	-0.578571	-0.0368137	-0.780882	-0.210118	-0.880597	-0.614051	0.705118	0	0.178309	-0.448264	COPS8	COPS8	COPS8	COPS8.L;COPS8.S;COPS8	COPS8	COPS8	COP9 SIGNALOSOME COMPLEX SUBUNIT 8-LIKE	COPS8	CSN8_RAT;COPS8	COP9 SIGNALOSOME COMPLEX SUBUNIT 8;PUTATIVE COP9 SIGNALOSOME COMPLEX SUBUNIT 8		COP9 SIGNALOSOME COMPLEX SUBUNIT 8;COPS8
5172	PORTHOMCL5172[AjBfCgCiDrGgLvMmOjOlPsSpXl|(14 genes, 13 taxa)]:	-0.316813	-0.613934	-0.621209	-0.258333	-0.373525	-0.500588	0.188338	0.623147	0.374231	-0.75418	-0.252206	-0.4474	RAB28	RAB28	RAB28	LOC108698037;RAB28	RAB28	CABZ01116516.1	RAS-RELATED PROTEIN RAB-28-LIKE;RAB28	RAB28	RAB28_MOUSE	PUTATIVE RAS-RELATED PROTEIN;RAB28	RAB28_PONAB;RAB28	RAS-RELATED PROTEIN RAB-28;RAB28
7321	PORTHOMCL7321[AjBfDrGgLvMmOjOlPsSpXl|(12 genes, 11 taxa)]:	-0.253956	-0.705538	-0.511703	-0.230172	-0.700882	-0.281853	0	-0.0107692	0.0630882	-0.859319	-0.310662	-0.447351	INO80C	INO80C	INO80C	INO80C.S;INO80C	INO80C	INO80C		INO80C	IN80C_MOUSE;INO80C	PUTATIVE INO80 COMPLEX SUBUNIT C-LIKE;INO80C		INO80 COMPLEX SUBUNIT C;INO80C
4456	PORTHOMCL4456[AjBfCiDrGgMmOjOlPsSpXl|(15 genes, 11 taxa)]:	-0.672308	-0.841187	-0.512033	-0.0533333	-0.332794	-0.269706	-0.857182	-0.508811	0.492794	0	-0.798284	-0.446893	TAF5L	TAF5L	TAF5L	TAF5L.S;TAF5L.L;TAF5L	TAF5L	TAF5L	TAF5-LIKE RNA POLYMERASE II P300/CBP-ASSOCIATED FACTOR-ASSOCIATED FACTOR 65 KDA SUBUNIT 5L	TAF5L	TAF5L_MOUSE;TAF5L	PUTATIVE TAF5-LIKE RNA POLYMERASE II		TAF5-LIKE RNA POLYMERASE II P300/CBP-ASSOCIATED FACTOR-ASSOCIATED FACTOR 65 KDA SUBUNIT 5L;TRANSCRIPTION INITIATION FACTOR TFIID SUBUNIT 5;TAF5L;TAF5
5640	PORTHOMCL5640[AjCgCiDrGgLvMmOjOlPsSpXl|(14 genes, 12 taxa)]:	-0.404296	-0.454835	-0.575879	-0.18718	-0.783647	-0.274573	0.119068	0	0.510355	0.461242	0.679421	-0.446735	FOXB1	FOXB1	FOXB1	FOXB1.L	FOXB1	FOXB1B;FOXB1A	FOXB PROTEIN		FOXB1_XENLA	FORKHEAD B	FOXB1_XENLA;FOXB1	WINGED HELIX TRANSCRIPTION FACTOR FORKHEAD-1
5492	PORTHOMCL5492[AjBfCgCiDrGgLvMmOjOlPsSpXl|(14 genes, 13 taxa)]:	-0.643791	-0.63789	-0.552582	-0.00671569	-0.559951	-0.275912	0.544623	0.0737063	-0.00917647	-0.746522	-0.298162	-0.44614	RLI;ABCE1	ABCE1	ABCE1	ABCE1.S;ABCE1	ABCE1	ABCE1	ATP-BINDING CASSETTE SUB-FAMILY E MEMBER 1	ABCE1	ABCE1_MOUSE	PUTATIVE ATP-BINDING CASSETTE SUB-FAMILY E MEMBER 1;ABCE1	ABCE1_MOUSE;ABCE1	ATP-BINDING CASSETTE SUB-FAMILY E MEMBER 1;ABCE1
4846	PORTHOMCL4846[AjBfCgCiDrGgLvMmOjOlPsSpXl|(15 genes, 13 taxa)]:	-0.324286	-0.648396	-0.517088	-0.782525	-0.370466	-0.0296765	-0.174831	-0.458182	-0.0198235	0.695666	-0.0824755	-0.445406	HSP90B1	HSP90B1	HSP90B1	HSP90B1.L;MGC68448;HSP90B1	HSP90B1	HSP90B1	ENDOPLASMIN-LIKE;HSP90B1	HSP90AA1	ENPL_RAT	HEAT SHOCK PROTEIN GP96;HSP90B1	ENPL_RAT;HSP90B1	HEAT SHOCK PROTEIN GP96;HSP90B1
2545	PORTHOMCL2545[AjBfCgCiDrGgLvMmOjOlPsSpXl|(19 genes, 13 taxa)]:	-0.185714	-0.663385	-0.39478	-0.423949	-0.326422	-0.676824	-0.801455	-0.184965	-0.802059	-0.715088	-0.328554	-0.445179	TRAPPC8	TRAPPC8	TRAPPC8	TRAPPC8.S	TRAPPC8	TRAPPC8	TRAFFICKING PROTEIN PARTICLE COMPLEX SUBUNIT 8-LIKE	TRAPPC8	TPPC8_HUMAN;TRAPPC8	PUTATIVE TRAFFICKING PROTEIN PARTICLE COMPLEX SUBUNIT 8	TPPC8_HUMAN	TRAFFICKING PROTEIN PARTICLE COMPLEX SUBUNIT 8
6697	PORTHOMCL6697[AjBfCgCiDrGgLvMmOjOlPsSpXl|(13 genes, 13 taxa)]:	-0.652418	-0.325714	-0.614505	-0.24277	-0.559118	-0.275853	-0.111	-0.504965	0.339853	-0.435253	-0.2	-0.445063	EIF5	EIF5	EIF5	EIF5.L;EIF5	EIF5	EIF5	EUKARYOTIC TRANSLATION INITIATION FACTOR 5, TRANSCRIPT VARIANT X1; EUKARYOTIC TRANSLATION INITIATION FACTOR 5, TRANSCRIPT VARIANT X2; EUKARYOTIC TRANSLATION INITIATION FACTOR 5, TRANSCRIPT VARIANT X3; EUKARYOTIC TRANSLATION INITIATION FACTOR 5, TRANSCRIPT VARIANT X4;EIF5	EIF5	IF5_MOUSE;EIF5	PUTATIVE EUKARYOTIC TRANSLATION INITIATION FACTOR 5	IF5_DROME;EIF5	EUKARYOTIC TRANSLATION INITIATION FACTOR 5;EIF5
6790	PORTHOMCL6790[AjCgCiDrGgLvMmOjOlPsSpXl|(13 genes, 12 taxa)]:	-0.548407	-0.638857	-0.719121	-0.0430637	-0.355441	-0.362206	-0.780455	0	-0.840706	-0.408545	-0.626169	-0.444516	POT1	POT1	POT1A;POT1B;POT1	POT1.L;POT1	POT1	POT1	UNCHARACTERIZED LOC100181958, TRANSCRIPT VARIANT X2; UNCHARACTERIZED LOC100181958, TRANSCRIPT VARIANT X1		POTE1_CHICK	PUTATIVE PROTECTION OF TELOMERES PROTEIN 1	POTE1_CHICK	PROTECTION OF TELOMERES PROTEIN 1
4935	PORTHOMCL4935[AjBfCgCiDrGgLvMmOjOlPsSpXl|(15 genes, 13 taxa)]:	-0.385549	-0.797802	-0.548681	-0.381225	-0.12826	-0.425441	-0.835883	-0.399905	-0.684529	0.0306089	-0.766299	-0.444493	ORC3	ORC3	ORC3	ORC3.S;ORC3	ORC3	ORC3	ORIGIN RECOGNITION COMPLEX SUBUNIT 3-LIKE	ORC3	ORC3_BOVIN;ORC3	PUTATIVE ORIGIN RECOGNITION COMPLEX SUBUNIT 3;ORC3	ORC3_HUMAN	ORIGIN RECOGNITION COMPLEX SUBUNIT 3;ORC3
1788	PORTHOMCL1788[AjBfCgDrGgLvMmOjOlPsSpXl|(22 genes, 12 taxa)]:	-0.0795055	-0.169143	-0.531374	-0.677034	-0.622304	-0.581353	0	0.625664	-0.639794	0.183942	0.505392	-0.443452	HELZ	HELZ	HELZ	HELZ.S;HELZ.L;HELZ	HELZ	HELZ		HELZ	HELZ_HUMAN	PUTATIVE HELICASE WITH ZINC FINGER DOMAIN 2 ISOFORM X4;PUTATIVE HELICASE WITH ZINC FINGER DOMAIN 2;HYPOTHETICAL PROTEIN;PUTATIVE HELICASE WITH ZINC FINGER DOMAIN	HELZ_DANRE	PROBABLE HELICASE WITH ZINC FINGER DOMAIN;UNCHARACTERIZED LOC105441396;HELZ
4186	PORTHOMCL4186[AjBfCgCiDrGgLvMmOjOlPsSpXl|(16 genes, 13 taxa)]:	-0.0995604	-0.584176	-0.413352	-0.162672	-0.59549	-0.802376	0.0883117	0.311469	-0.785794	-0.386563	-0.444608	-0.442938	RABEPK	RABEPK	RABEPK	RABEPK.L;RABEPK	RABEPK	RABEPK	UNCHARACTERIZED LOC100178086	RABEPK	RABEK_XENLA;RABEPK	PUTATIVE RAB9 EFFECTOR PROTEIN WITH KELCH MOTIFS-LIKE;RABEPK	RABEK_XENLA;RABEPK	RAB9 EFFECTOR PROTEIN WITH KELCH MOTIFS;RABEPK
12652	PORTHOMCL12652[DrGgMmOlPsXl|(6 genes, 6 taxa)]:	-0.527582	-0.591912	-0.556429	-0.40701	-0.21027	-0.363324	0	0	0	0	0	-0.442754	RPL7L1	RPL7L1	RPL7L1	RPL7L1.L;RPL7L1	RPL7L1	RPL7L1
3612	PORTHOMCL3612[AjBfCgCiDrGgLvMmOjOlPsSpXl|(17 genes, 13 taxa)]:	-0.52033	-0.737846	-0.553022	-0.266642	-0.487157	-0.0907941	-0.809948	0.316573	-0.313647	-0.918246	-0.763848	-0.442632	PUM3	KIAA0020;PUM3	PUM3	PUM3.S;PUM3.L;PUM3	PUM3	PUM3	PUMILIO HOMOLOG 3, TRANSCRIPT VARIANT X1; PUMILIO HOMOLOG 3, TRANSCRIPT VARIANT X2; PUMILIO HOMOLOG 3, TRANSCRIPT VARIANT X3;PUM3	PUM3	PUM3_RAT;PUM3_DANRE	HYPOTHETICAL PROTEIN	PUM3_RAT;PUM3	PUMILIO DOMAIN-CONTAINING PROTEIN KIAA0020 HOMOLOG;PUM3
11555	PORTHOMCL11555[DrGgMmOlPsXl|(7 genes, 6 taxa)]:	-0.767088	-0.561669	-0.0619331	-0.0952104	-0.83963	-0.328703	0	0	0	0	0	-0.442372	FGF3	FGF3	FGF3	FGF3.S;FGF3	FGF3	FGF3
5193	PORTHOMCL5193[AjBfCgCiDrGgLvMmOjOlPsSpXl|(14 genes, 13 taxa)]:	-0.462363	-0.633231	-0.546648	-0.345	-0.41326	-0.247088	-0.795506	-0.606014	0.181794	-0.675315	-0.779289	-0.441265	WDR43	WDR43	WDR43	WDR43.L;LOC398447;WDR43	WDR43	WDR43	WD REPEAT-CONTAINING PROTEIN 43	WDR43	WDR43_HUMAN;WDR43	PUTATIVE WD REPEAT-CONTAINING PROTEIN 43	WDR43_HUMAN;WDR43	WD REPEAT-CONTAINING PROTEIN 43;WDR43
1745	PORTHOMCL1745[AjBfCgCiDrGgLvMmOjOlPsSpXl|(23 genes, 13 taxa)]:	-0.037033	-0.205363	-0.564066	-0.430833	-0.666593	-0.743235	-0.166325	-0.702727	-0.504941	0.370898	-0.129534	-0.441187	PARVB;PARVA	PARVB	PARVA;PARVB	PARVB.S;PARVA.L;PARVB	PARVAA;PARVB;PARVA	PARVB;PARVAB;PARVAA;PARVA	BETA-PARVIN, TRANSCRIPT VARIANT X2; BETA-PARVIN, TRANSCRIPT VARIANT X1;PARVB	PARVB	PARVB_HUMAN;PARVB	PUTATIVE BETA-PARVIN-LIKE ISOFORM X3;PARVA	PARVB_HUMAN;PARVA	BETA-PARVIN-LIKE, TRANSCRIPT VARIANT X3; BETA-PARVIN-LIKE, TRANSCRIPT VARIANT X1; BETA-PARVIN-LIKE, TRANSCRIPT VARIANT X2; BETA-PARVIN-LIKE, TRANSCRIPT VARIANT X4;BETA-PARVIN-LIKE, TRANSCRIPT VARIANT X2; BETA-PARVIN-LIKE, TRANSCRIPT VARIANT X4; BETA-PARVIN-LIKE, TRANSCRIPT VARIANT X1; BETA-PARVIN-LIKE, TRANSCRIPT VARIANT X3;BETA-PARVIN
3495	PORTHOMCL3495[AjBfCgCiDrGgLvMmOjOlPsSpXl|(17 genes, 13 taxa)]:	-0.272143	-0.210857	-0.685659	-0.460196	-0.216225	-0.799089	-0.177652	-0.672974	-0.602235	-0.563343	-0.680147	-0.440695	ADAL	ADAL	ADAL	ADAL.L;MGC80849;ADAL	ADAL	ADAL	ADENOSINE DEAMINASE-LIKE PROTEIN;ADAL	ADAL	ADAL_DANRE;ADAL	PUTATIVE ADENOSINE DEAMINASE-LIKE PROTEIN;PUTATIVE ADENOSINE DEAMINASE-LIKE PROTEIN-LIKE;ADAL	ADAL_DANRE;ADAL	ADENOSINE DEAMINASE-LIKE PROTEIN;ADAL
4855	PORTHOMCL4855[AjBfCgCiDrGgLvMmOjOlPsSpXl|(15 genes, 13 taxa)]:	-0.338407	-0.237231	-0.0454945	-0.780466	-0.613824	-0.617471	0.0342338	0.129301	-0.0531611	0.768444	0.601103	-0.438815	NDUFAB1	NDUFAB1	NDUFAB1	NDUFAB1.L;NDUFAB1.S;NDUFAB1	NDUFAB1B;NDUFAB1	NDUFAB1B;NDUFAB1A;NDUFAB1	ACYL CARRIER PROTEIN, MITOCHONDRIAL-LIKE;NDUFAB1	NDUFAB1	ACPM_PANTR;NDUFAB1	PUTATIVE ACYL CARRIER PROTEIN, MITOCHONDRIAL ISOFORM X2	ACPM_PONPY	ACYL CARRIER PROTEIN, MITOCHONDRIAL, TRANSCRIPT VARIANT X2; ACYL CARRIER PROTEIN, MITOCHONDRIAL, TRANSCRIPT VARIANT X1
4183	PORTHOMCL4183[AjBfCgCiDrGgLvMmOjOlPsSpXl|(16 genes, 13 taxa)]:	-0.467637	-0.694154	-0.550165	-0.467696	-0.152623	-0.299029	-0.874688	0.597133	-0.86	-0.759071	-0.710417	-0.438551	ESF1		ESF1	ESF1.L;ESF1	ESF1	ESF1	ESF1 HOMOLOG, TRANSCRIPT VARIANT X2; ESF1 HOMOLOG, TRANSCRIPT VARIANT X1	ESF1	ESF1_MOUSE	PUTATIVE ESF1-LIKE ISOFORM X3	ESF1_MOUSE;ESF1	ESF1 HOMOLOG, TRANSCRIPT VARIANT X3; ESF1 HOMOLOG, TRANSCRIPT VARIANT X6; ESF1 HOMOLOG, TRANSCRIPT VARIANT X5; ESF1 HOMOLOG, TRANSCRIPT VARIANT X1; ESF1 HOMOLOG, TRANSCRIPT VARIANT X4; ESF1 HOMOLOG, TRANSCRIPT VARIANT X2;ESF1 HOMOLOG;ESF1
10710	PORTHOMCL10710[DrGgMmOlPsXl|(8 genes, 6 taxa)]:	-0.015	-0.487429	-0.396264	-0.614627	-0.322966	-0.791921	0	0	0	0	0	-0.438034	ELK3	ELK3	ELK3	ELK3.S;ELK3.L;ELK3	ELK3;ETS DOMAIN-CONTAINING PROTEIN ELK-3	ELK3
3672	PORTHOMCL3672[AjBfCgCiDrGgLvMmOjOlPsSpXl|(16 genes, 13 taxa)]:	-0.701868	-0.541538	-0.0587363	-0.197913	-0.64576	-0.4795	-0.839026	0.33972	-0.830294	-0.86236	-0.774877	-0.437553	HMBS	HMBS	HMBS	HMBS.2.S	HMBSA	HMBSB;HMBSA	PORPHOBILINOGEN DEAMINASE;HMBS	HMBS	HEM3_HUMAN;HMBS	PUTATIVE PORPHOBILINOGEN DEAMINASE ISOFORM X2;HMBS	HEM3_HUMAN	PORPHOBILINOGEN DEAMINASE, TRANSCRIPT VARIANT X1; PORPHOBILINOGEN DEAMINASE, TRANSCRIPT VARIANT X2
2539	PORTHOMCL2539[AjBfCgCiDrGgLvMmOjOlPsSpXl|(19 genes, 13 taxa)]:	-0.265714	-0.45644	-0.571209	-0.567279	-0.0456373	-0.717265	-0.778766	0.275175	0.703794	-0.448008	0.546814	-0.437257	NSA2	NSA2	NSA2	LOC108707259;NSA2.L;NSA2	NSA2	NSA2	RIBOSOME BIOGENESIS PROTEIN NSA2 HOMOLOG, TRANSCRIPT VARIANT X2; RIBOSOME BIOGENESIS PROTEIN NSA2 HOMOLOG, TRANSCRIPT VARIANT X3; RIBOSOME BIOGENESIS PROTEIN NSA2 HOMOLOG, TRANSCRIPT VARIANT X1;NSA2	NSA2	NSA2_HUMAN;IP259	PUTATIVE RIBOSOME BIOGENESIS PROTEIN NSA2-LIKE;RIBOSOME BIOGENESIS PROTEIN NSA2-LIKE PROTEIN;NSA2	NSA2_HUMAN	RIBOSOME BIOGENESIS PROTEIN NSA2 HOMOLOG;NSA2
6704	PORTHOMCL6704[AjBfCiDrGgLvMmOjOlPsSpXl|(13 genes, 12 taxa)]:	-0.110549	-0.867956	-0.592747	-0.0302451	-0.263725	-0.756824	-0.87826	-0.79753	-0.565735	-0.252941	-0.561251	-0.437008	TAMM41	TAMM41	TAMM41	TAMM41.S;TAMM41	TAMM41	TAMM41	PHOSPHATIDATE CYTIDYLYLTRANSFERASE, MITOCHONDRIAL-LIKE;TAMM41		TAM41_MOUSE;TAM41_DANRE;TAMM41	PUTATIVE MMP37-LIKE PROTEIN, MITOCHONDRIAL ISOFORM X1	TAM41_DANRE	MMP37-LIKE PROTEIN, MITOCHONDRIAL, TRANSCRIPT VARIANT X1; MMP37-LIKE PROTEIN, MITOCHONDRIAL;TAMM41
5226	PORTHOMCL5226[AjBfCiDrGgLvMmOjOlPsSpXl|(14 genes, 12 taxa)]:	-0.415549	-0.73433	-0.656429	-0.235564	-0.115343	-0.455471	-0.744169	0.187063	-0.162324	-0.644582	-0.741789	-0.435448	TMEM177	TMEM177	TMEM177	TMEM177.L;TMEM177	TMEM177	TMEM177	TRANSMEMBRANE PROTEIN 177-LIKE		TM177_DANRE	PUTATIVE TRANSMEMBRANE PROTEIN	TM177_DANRE	TRANSMEMBRANE PROTEIN 177-LIKE, TRANSCRIPT VARIANT X1; TRANSMEMBRANE PROTEIN 177-LIKE, TRANSCRIPT VARIANT X2
6317	PORTHOMCL6317[AjBfCgCiDrGgLvMmOjOlPsSpXl|(13 genes, 13 taxa)]:	-0.316209	-0.937538	-0.174066	-0.0429657	-0.629265	-0.508147	-0.746532	-0.173427	0.438559	0.0761816	-0.247672	-0.434698	WDR34	WDR34	WDR34	WDR34.L;WDR34	WDR34	WDR34	WD REPEAT-CONTAINING PROTEIN 34, TRANSCRIPT VARIANT X1;LOC100185043	WDR34	WDR34_MOUSE;WDR34	PUTATIVE WD REPEAT-CONTAINING PROTEIN 34-LIKE;WDR34	WDR34_MOUSE;WDR34	WD REPEAT-CONTAINING PROTEIN 34, TRANSCRIPT VARIANT X2; WD REPEAT-CONTAINING PROTEIN 34, TRANSCRIPT VARIANT X1; WD REPEAT-CONTAINING PROTEIN 34, TRANSCRIPT VARIANT X3; WD REPEAT-CONTAINING PROTEIN 34, TRANSCRIPT VARIANT X4;WDR34
4782	PORTHOMCL4782[AjBfCgCiDrGgLvMmOjOlPsSpXl|(15 genes, 13 taxa)]:	-0.559286	-0.659297	-0.550659	-0.145809	-0.0754657	-0.617206	-0.476026	0.383706	-0.819529	-0.646502	-0.819118	-0.43462	NUDCD1	NUDCD1	NUDCD1	NUDCD1.S;NUDCD1	NUDCD1	NUDCD1	NUDC DOMAIN-CONTAINING PROTEIN 1-LIKE;NUDCD1	NUDCD1	NUDC1_MOUSE;NUDCD1	PUTATIVE NUDC DOMAIN-CONTAINING PROTEIN 1 ISOFORM X2;NUDCD1	NUDC1_XENTR	NUDC DOMAIN-CONTAINING PROTEIN 1, TRANSCRIPT VARIANT X2; NUDC DOMAIN-CONTAINING PROTEIN 1, TRANSCRIPT VARIANT X1;NUDC DOMAIN-CONTAINING PROTEIN 1;NUDCD1
7105	PORTHOMCL7105[AjCgDrGgLvMmOjOlPsSpXl|(12 genes, 11 taxa)]:	-0.076044	-0.260571	-0.392747	-0.839583	-0.764436	-0.274294	0	0	-0.752912	-0.0433315	0.110049	-0.434613	MRPL9	MRPL9	MRPL9	MRPL9.S;MRPL9.L	MRPL9	MRPL9			RM09_RAT	PUTATIVE 39S RIBOSOMAL PROTEIN L9, MITOCHONDRIAL ISOFORM X3		39S RIBOSOMAL PROTEIN L9, MITOCHONDRIAL, TRANSCRIPT VARIANT X2; 39S RIBOSOMAL PROTEIN L9, MITOCHONDRIAL, TRANSCRIPT VARIANT X3; 39S RIBOSOMAL PROTEIN L9, MITOCHONDRIAL, TRANSCRIPT VARIANT X1; 39S RIBOSOMAL PROTEIN L9, MITOCHONDRIAL, TRANSCRIPT VARIANT X4;MRPL9
2832	PORTHOMCL2832[AjBfCiDrGgLvMmOjOlPsSpXl|(18 genes, 12 taxa)]:	-0.703077	-0.236967	-0.541374	-0.19549	-0.595123	-0.333853	-0.51461	0.526993	0.675412	-0.733829	-0.64424	-0.434314	CNBP	CNBP	CNBP;ZCCHC13	CNBP.S;LOC108704043;CNBP	CNBPA;CNBP	CNBPB;CNBPA;CNBP	CELLULAR NUCLEIC ACID-BINDING PROTEIN, TRANSCRIPT VARIANT X2; CELLULAR NUCLEIC ACID-BINDING PROTEIN, TRANSCRIPT VARIANT X1;LOC100184036		HEXP_LEIMA;ZCCHC13	PUTATIVE CELLULAR NUCLEIC ACID-BINDING PROTEIN-LIKE ISOFORM X2	Y3800_DROME	DNA-BINDING PROTEIN HEXBP, TRANSCRIPT VARIANT X3; DNA-BINDING PROTEIN HEXBP, TRANSCRIPT VARIANT X2; DNA-BINDING PROTEIN HEXBP, TRANSCRIPT VARIANT X1; DNA-BINDING PROTEIN HEXBP, TRANSCRIPT VARIANT X5; DNA-BINDING PROTEIN HEXBP, TRANSCRIPT VARIANT X4;DNA-BINDING PROTEIN HEXBP, TRANSCRIPT VARIANT X2; DNA-BINDING PROTEIN HEXBP, TRANSCRIPT VARIANT X1
4003	PORTHOMCL4003[AjBfCgCiDrGgLvMmOjOlPsSpXl|(16 genes, 13 taxa)]:	-0.219505	-0.0461099	-0.48033	-0.471691	-0.659877	-0.724235	-0.811117	0.824126	-0.930412	-0.385181	-0.710784	-0.433625	AAMP	AAMP	AAMP	AAMP.L;AAMP.S;AAMP	AAMP	AAMP	ANGIO-ASSOCIATED MIGRATORY CELL PROTEIN-LIKE, TRANSCRIPT VARIANT X2; ANGIO-ASSOCIATED MIGRATORY CELL PROTEIN-LIKE, TRANSCRIPT VARIANT X1; ANGIO-ASSOCIATED MIGRATORY CELL PROTEIN-LIKE, TRANSCRIPT VARIANT X3;AAMP	AAMP	AAMP_BOVIN	PUTATIVE ANGIO-ASSOCIATED MIGRATORY CELL PROTEIN;AAMP	AAMP_CANLF;AAMP_HUMAN;AAMP	ANGIO-ASSOCIATED MIGRATORY CELL PROTEIN;AAMP
2210	PORTHOMCL2210[AjBfCgCiDrGgLvMmOjOlPsSpXl|(20 genes, 13 taxa)]:	-0.326484	-0.413714	-0.400769	-0.818064	-0.205686	-0.435265	0.642831	-0.736993	0.464147	0.706089	0.198775	-0.43333	PDIA3	PDIA3	PDIA3	LOC108711434;PDIA3.S;PDIA3	PDIA3;ZGC:100906	ZGC:77086;PDIA3;ZGC:100906	PROTEIN DISULFIDE-ISOMERASE A3	PDIA3	PDIA3_PONAB;PDIA3	HYPOTHETICAL PROTEIN;TRXA;PDIA3	PDIA3_MOUSE	PROTEIN DISULFIDE-ISOMERASE A4;PROTEIN DISULFIDE-ISOMERASE A3;PDIA4
8410	PORTHOMCL8410[DrGgMmOlPsXl|(11 genes, 6 taxa)]:	-0.646484	-0.881275	-0.558571	-0.142745	-0.222721	-0.147159	0	0	0	0	0	-0.433159	KIF20B	KIF20B	KIF20B	KIF20B.S;KIF20B	KINESIN-LIKE PROTEIN KIF20B;KIF20BA;KIF20B	KIF20BB
1013	PORTHOMCL1013[AjBfCgCiDrGgLvMmOlPsSpXl|(29 genes, 12 taxa)]:	-0.150165	-0.838549	-0.765769	-0.440555	-0.275074	-0.125676	-0.359653	0.61951	0	-0.394044	-0.204124	-0.432631	KCTD1	KCTD1	KCTD1	LOC108719227;LOC108719725;KCTD1	KCTD1	ZGC:174877;KCTD1	UNCHARACTERIZED LOC100186276			HYPOTHETICAL PROTEIN	K1958_MOUSE	UNCHARACTERIZED PROTEIN KIAA1958-LIKE;UNCHARACTERIZED LOC105446044
3854	PORTHOMCL3854[AjBfCgCiDrGgLvMmOjOlPsSpXl|(16 genes, 13 taxa)]:	-0.43489	-0.712484	-0.577912	-0.273897	-0.22299	-0.370353	-0.692052	-0.560839	-0.889912	-0.244706	-0.46299	-0.432088	UMPS	UMPS	UMPS	UMPS.L;UMPS	UMPS	UMPS	URIDINE 5'-MONOPHOSPHATE SYNTHASE-LIKE, TRANSCRIPT VARIANT X3; URIDINE 5'-MONOPHOSPHATE SYNTHASE-LIKE, TRANSCRIPT VARIANT X2; URIDINE 5'-MONOPHOSPHATE SYNTHASE-LIKE, TRANSCRIPT VARIANT X1;UMPS	UMPS	UMPS_BOVIN;UMPS_HUMAN	PUTATIVE URIDINE 5'-MONOPHOSPHATE SYNTHASE-LIKE;UMPS	UMPS_PONAB;UMPS_HUMAN	URIDINE 5'-MONOPHOSPHATE SYNTHASE;UMPS
5456	PORTHOMCL5456[AjBfCgCiDrGgLvMmOjOlPsSpXl|(14 genes, 13 taxa)]:	-0.529615	-0.784044	-0.56511	-0.1525	-0.410074	-0.147706	-0.887805	0.290475	-0.874618	0.0530466	-0.588725	-0.431508	ZZZ3	ZZZ3	ZZZ3	ZZZ3.L;ZZZ3.S;ZZZ3	ZZZ3	ZZZ3	ZINC FINGER PROTEIN 1, TRANSCRIPT VARIANT X1; ZINC FINGER PROTEIN 1	ZZZ3	ZZZ3_HUMAN	PUTATIVE ZZ-TYPE ZINC FINGER-CONTAINING PROTEIN 3	ZZZ3_MOUSE	ZZ-TYPE ZINC FINGER-CONTAINING PROTEIN 3
3779	PORTHOMCL3779[AjBfCgCiDrGgLvMmOjOlPsSpXl|(16 genes, 13 taxa)]:	-0.531154	-0.818725	-0.62467	-0.206936	-0.346838	-0.0564775	0.0153506	0.250769	-0.309147	-0.750444	-0.758578	-0.4308	PMS2	PMS2	PMS2;GM42421	PMS2.L;PMS2	PMS2	PMS2	MISMATCH REPAIR ENDONUCLEASE PMS2-LIKE;PMS2		PMS2_HUMAN;PMS2_MOUSE;PMS2	MISMATCH REPAIR ENDONUCLEASE PMS2;HYPOTHETICAL PROTEIN;PMS2	PMS2_HUMAN	MISMATCH REPAIR ENDONUCLEASE PMS2
4473	PORTHOMCL4473[AjBfCgCiDrGgLvMmOjOlPsSpXl|(15 genes, 13 taxa)]:	-0.533736	-0.649714	-0.51978	-0.448333	-0.00651961	-0.421206	-0.641143	-0.44442	0.132382	-0.509432	-0.345466	-0.429882	RSL24D1	RSL24D1	RSL24D1;GM20509	MGC81028	RSL24D1	RSL24D1	PROBABLE RIBOSOME BIOGENESIS PROTEIN RLP24, TRANSCRIPT VARIANT X2; PROBABLE RIBOSOME BIOGENESIS PROTEIN RLP24, TRANSCRIPT VARIANT X1	RSL24D1	RLP24_MOUSE;RSL24D1	PUTATIVE RIBOSOME BIOGENESIS PROTEIN RLP24;RSL24D1	RLP24_MOUSE;RSL24D1	PROBABLE RIBOSOME BIOGENESIS PROTEIN RLP24
6153	PORTHOMCL6153[AjBfCgCiDrGgLvMmOjOlPsSpXl|(13 genes, 13 taxa)]:	-0.441044	-0.722242	-0.55033	-0.575074	-0.105833	-0.183588	-0.87039	-0.546085	0.139853	-0.758762	-0.645343	-0.429685	ECD	ECD	ECD	ECD.S;ECD	ECD	ECD	HSIGNALLINGT1 PROTEIN	ECD	ECD_MOUSE;ECD	HYPOTHETICAL PROTEIN;ECD	ECD_HUMAN	PROTEIN SGT1
5701	PORTHOMCL5701[AjBfCgCiDrGgLvMmOjOlPsSpXl|(14 genes, 13 taxa)]:	-0.213846	-0.482022	-0.58511	-0.696936	-0.107083	-0.486324	-0.753416	-0.45257	0.183647	0.485181	-0.678309	-0.428554	NPLOC4	NPLOC4	NPLOC4	NPLOC4.S	NPLOC4	NPLOC4	NUCLEAR PROTEIN LOCALIZATION PROTEIN 4 HOMOLOG;NPLOC4	NPLOC4	NPL4_RAT	PUTATIVE NUCLEAR PROTEIN LOCALIZATION PROTEIN 4-LIKE;NPLOC4	NPL4_HUMAN;NPLOC4	NUCLEAR PROTEIN LOCALIZATION PROTEIN 4 HOMOLOG;NPLOC4
6001	PORTHOMCL6001[AjBfCgCiDrGgMmOjOlPsSpXl|(14 genes, 12 taxa)]:	-0.375	-0.593055	-0.685275	-0.0409314	-0.743652	-0.132882	-0.735065	0.427273	-0.4575	0	-0.193137	-0.428466	UPF3B	UPF3B	UPF3B	UPF3B.S	UPF3B	UPF3B	REGULATOR OF NONSENSE TRANSCRIPTS 3B-LIKE, TRANSCRIPT VARIANT X2; REGULATOR OF NONSENSE TRANSCRIPTS 3B-LIKE, TRANSCRIPT VARIANT X3;UPF3A	UPF3B	REN3B_HUMAN	PUTATIVE REGULATOR OF NONSENSE TRANSCRIPTS 3A-LIKE;UPF3A		REGULATOR OF NONSENSE TRANSCRIPTS 3A;REGULATOR OF NONSENSE TRANSCRIPTS 3B-LIKE;UPF3A
4820	PORTHOMCL4820[AjBfCgCiDrGgLvMmOjOlPsSpXl|(15 genes, 13 taxa)]:	-0.331648	-0.450681	-0.297582	-0.715931	-0.0820343	-0.690415	-0.820532	0.223357	-0.0388824	-0.700289	-0.697917	-0.428049	TIMM22	TIMM22	TIMM22	TIMM22.S;TIMM22	TIMM22	TIMM22	MITOCHONDRIAL IMPORT INNER MEMBRANE TRANSLOCASE SUBUNIT TIM22-LIKE	TIMM22	TIM22_RAT	PUTATIVE MITOCHONDRIAL IMPORT INNER MEMBRANE TRANSLOCASE SUBUNIT TIM22	TIM22_XENTR;TIMM22	MITOCHONDRIAL IMPORT INNER MEMBRANE TRANSLOCASE SUBUNIT TIM22;TIMM22
8913	PORTHOMCL8913[BfCgCiDrGgLvMmOlPsXl|(10 genes, 10 taxa)]:	-0.408022	-0.672176	-0.385824	-0.192955	-0.240735	-0.665828	-0.653818	-0.719295	0	0.703571	0	-0.42759	BCL10	BCL10	BCL10	BCL10.S	BCL10	BCL10	UNCHARACTERIZED LOC100181150, TRANSCRIPT VARIANT X2; UNCHARACTERIZED LOC100181150, TRANSCRIPT VARIANT X1				BCL10_MOUSE
1036	PORTHOMCL1036[AjBfCgCiDrGgLvMmOjOlPsSpXl|(29 genes, 13 taxa)]:	-0.178571	-0.0735385	-0.75022	-0.359216	-0.604632	-0.594176	-0.417571	-0.861888	-0.687706	-0.824665	-0.223529	-0.426726	FNDC3A;FNDC3B	FNDC3B;FNDC3A	FNDC3A;FNDC3C1;FND3C2	FNDC3A.L;FNDC3B.L;FNDC3A.2.S;FNDC3A.2.L;FNDC3A;FNDC3B	FNDC3A;FNDC3BA;FNDC3B	FNDC3BA;FNDC3BB;FNDC3A;FNDC3B	FIBRONECTIN TYPE-III DOMAIN-CONTAINING PROTEIN 3A-LIKE;FIBRONECTIN TYPE-III DOMAIN-CONTAINING PROTEIN 3A-LIKE, TRANSCRIPT VARIANT X2; FIBRONECTIN TYPE-III DOMAIN-CONTAINING PROTEIN 3A-LIKE, TRANSCRIPT VARIANT X3; FIBRONECTIN TYPE-III DOMAIN-CONTAINING PROTEIN 3A-LIKE, TRANSCRIPT VARIANT X1	FNDC3A	FND3A_MOUSE	HYPOTHETICAL PROTEIN;PUTATIVE TWITCHIN-LIKE	FND3A_MOUSE	FIBRONECTIN TYPE-III DOMAIN-CONTAINING PROTEIN 3A;FNDC3A
5722	PORTHOMCL5722[AjBfCgCiDrGgLvMmOjOlPsSpXl|(14 genes, 13 taxa)]:	-0.367253	-0.815341	-0.768626	-0.0113725	-0.544657	-0.0484412	0.655714	-0.0925175	-0.0743235	-0.309453	-0.718879	-0.425948	NVL	NVL	NVL	NVL.L;NVL	NVL	NVL	NUCLEAR VALOSIN-CONTAINING PROTEIN-LIKE	NVL	NVL_HUMAN;NVL	PUTATIVE NUCLEAR VALOSIN-CONTAINING PROTEIN-LIKE;NVL	NVL_HUMAN;NVL	NUCLEAR VALOSIN-CONTAINING PROTEIN-LIKE
7574	PORTHOMCL7574[BfCiDrGgMmOlPsXl|(12 genes, 8 taxa)]:	-0.324286	-0.66756	-0.615165	-0.638603	-0.179681	-0.127588	-0.717181	0.144202	0	0	0	-0.425481	MYNN	MYNN	MYNN	MYNN.L;MYNN	MYNN	MYNN	ZINC FINGER PROTEIN 317-LIKE
12849	PORTHOMCL12849[DrGgMmOlPsXl|(6 genes, 6 taxa)]:	-0.220659	-0.520747	-0.577802	-0.528578	-0.416201	-0.2865	0	0	0	0	0	-0.425081	UBAP2L	UBAP2L	UBAP2L	LOC108700413;UBAP2L	UBAP2L	UBAP2L
2504	PORTHOMCL2504[AjBfCgCiDrGgLvMmOlPsSpXl|(19 genes, 12 taxa)]:	-0.288516	-0.681319	-0.796044	-0.295	-0.170294	-0.313941	0.66826	0.303217	0	-0.81872	-0.601471	-0.424186	MED23	MED23	MED23	MED23.L;MED23	MED23	MED23	MEDIATOR OF RNA POLYMERASE II TRANSCRIPTION SUBUNIT 23-LIKE, TRANSCRIPT VARIANT X2; MEDIATOR OF RNA POLYMERASE II TRANSCRIPTION SUBUNIT 23-LIKE, TRANSCRIPT VARIANT X1;MED23	MED23		HYPOTHETICAL PROTEIN;PUTATIVE MEDIATOR OF RNA POLYMERASE II TRANSCRIPTION SUBUNIT 23;MED23	MED23_DANRE;MED23_XENLA	MEDIATOR OF RNA POLYMERASE II TRANSCRIPTION SUBUNIT 23;MED23
5278	PORTHOMCL5278[AjBfCgCiDrGgLvMmOjOlPsSpXl|(14 genes, 13 taxa)]:	-0.786154	-0.837363	-0.54956	-0.13174	-0.123113	-0.114382	-0.908299	0.0389407	0.434265	-0.0317766	-0.582475	-0.423719	MSH2	MSH2	MSH2	MSH2.L;MSH2	MSH2	MSH2	DNA MISMATCH REPAIR PROTEIN MSH2;MSH2	MSH2	MSH2_MOUSE;MSH2	PUTATIVE DNA MISMATCH REPAIR PROTEIN MSH2;MSH2	MSH2_CHLAE;MSH2	DNA MISMATCH REPAIR PROTEIN MSH2;MSH2
2002	PORTHOMCL2002[AjBfCgCiDrGgLvMmOjOlPsSpXl|(21 genes, 13 taxa)]:	-0.430714	-0.583209	-0.229341	-0.107157	-0.299559	-0.892147	-0.860195	-0.0435377	0.186147	0.32227	0.471078	-0.423688	CYP20A1	CYP20A1	CYP20A1	CYP20A1.L;CYP20A1	CYP20A1	CYP20A1	CYTOCHROME P450 20A1	CYP20A1	CP20A_HUMAN	HYPOTHETICAL PROTEIN	CP20A_BOVIN	CYTOCHROME P450 20A1
5811	PORTHOMCL5811[AjBfCgCiDrGgMmOjOlPsXl|(14 genes, 11 taxa)]:	-0.148693	-0.177679	-0.798632	-0.392689	-0.476159	-0.545101	0.555441	-0.59042	0.585229	0	0	-0.423159	NKX3-2	NKX3-2	NKX3-2	LOC108698038;NKX3-3.S;NKX3-2.S;NKX3-2	NKX3-2	NKX3.2;NKX3.3;NKX3-2	TRANSCRIPTION FACTOR PROTEIN		NKX32_MOUSE;NKX3-2	PUTATIVE HOMEOBOX PROTEIN HMX-LIKE
3019	PORTHOMCL3019[AjBfCgCiDrGgMmOjOlPsSpXl|(18 genes, 12 taxa)]:	-0.311538	-0.030989	-0.365879	-0.702966	-0.221691	-0.903794	0.810416	-0.439333	0.750088	0	0.384926	-0.42281	RPLP2	RPLP2	RPLP2	RPLP2.S;LOC398653;LOC100049136;RPLP2.L;RPLP2	RPLP2	RPLP2L;RPLP2	60S ACIDIC RIBOSOMAL PROTEIN P2;RPLP2	RPLP2	RLA2_RHOGU	PUTATIVE RIBOSOMAL PROTEIN P2;RPLP2		60S ACIDIC RIBOSOMAL PROTEIN P2
3733	PORTHOMCL3733[AjBfCgCiDrGgLvMmOjOlPsSpXl|(16 genes, 13 taxa)]:	-0.23467	-0.894549	-0.792033	-0.00615196	-0.0577941	-0.550131	-0.0263377	0.451794	-0.263559	0	0.391176	-0.422555	MEST	MEST	MEST	MEST.L;MEST	MEST	MEST	UNCHARACTERIZED PROTEIN MT1882-LIKE	MEST	MEST_BOVIN	PUTATIVE MESODERM-SPECIFIC TRANSCRIPT PROTEIN;HYPOTHETICAL PROTEIN	MEST_BOVIN	MESODERM-SPECIFIC TRANSCRIPT PROTEIN;MEST
1707	PORTHOMCL1707[AjBfCgCiDrGgLvMmOjOlPsSpXl|(23 genes, 13 taxa)]:	-0.14989	-0.649802	-0.654341	-0.0955637	-0.184118	-0.798205	-0.686325	-0.758805	-0.322294	-0.589205	-0.0914216	-0.421987	MTOR	MTOR	MTOR	MTOR.L;MTOR	MTOR (1 OF MANY);MTOR	MTOR	SERINE/THREONINE-PROTEIN KINASE MTOR-LIKE, TRANSCRIPT VARIANT X2; SERINE/THREONINE-PROTEIN KINASE MTOR-LIKE, TRANSCRIPT VARIANT X1;MTOR	MTOR	MTOR_MOUSE;MTOR;TOR	TARGET OF RAPAMYCIN	MTOR_MOUSE;MTOR_HUMAN;MTOR	SERINE/THREONINE-PROTEIN KINASE MTOR-LIKE;SERINE/THREONINE-PROTEIN KINASE MTOR;MTOR
8024	PORTHOMCL8024[AjBfDrGgLvMmOjOlPsSpXl|(11 genes, 11 taxa)]:	-0.51022	-0.892264	-0.151978	-0.158922	-0.00352941	-0.81246	0	-0.866617	-0.852088	-0.563034	-0.409069	-0.421562	NDUFAF6	NDUFAF6	NDUFAF6	NDUFAF6.L;NDUFAF6	NDUFAF6	NDUFAF6		NDUFAF6	NDUF6_MOUSE;NDUFAF6	PUTATIVE NADH DEHYDROGENASE (UBIQUINONE) COMPLEX I, ASSEMBLY FACTOR 6	NDUF6_BOVIN;NDUFAF6	NADH DEHYDROGENASE (UBIQUINONE) COMPLEX I, ASSEMBLY FACTOR 6;NDUFAF6
4053	PORTHOMCL4053[AjBfCgCiDrGgLvMmOjOlPsSpXl|(16 genes, 13 taxa)]:	-0.525055	-0.578989	-0.486429	-0.275882	-0.371005	-0.288382	0.653675	-0.178462	-0.890412	-0.722621	-0.612377	-0.420957	GNL2	GNL2	GNL2	GNL2.L;GNL2	GNL2	GNL2	NUCLEOLAR GTP-BINDING PROTEIN 2-LIKE		NOG2_MOUSE;GNL2	PUTATIVE NUCLEOLAR GTP-BINDING PROTEIN 2 ISOFORM X2;PUTATIVE NUCLEOLAR GTP-BINDING PROTEIN 2 ISOFORM X4;HYPOTHETICAL PROTEIN;GNL2	NOG2_MOUSE;GNL2	NUCLEOLAR GTP-BINDING PROTEIN 2, TRANSCRIPT VARIANT X4; NUCLEOLAR GTP-BINDING PROTEIN 2, TRANSCRIPT VARIANT X3; NUCLEOLAR GTP-BINDING PROTEIN 2, TRANSCRIPT VARIANT X1; NUCLEOLAR GTP-BINDING PROTEIN 2, TRANSCRIPT VARIANT X2;GNL2
4366	PORTHOMCL4366[AjBfCgCiDrGgLvMmOjOlPsSpXl|(15 genes, 13 taxa)]:	-0.448132	-0.564132	-0.546429	-0.513088	-0.0700735	-0.381676	-0.821169	-0.448277	-0.216971	-0.84838	-0.741422	-0.420588	TBL3	TBL3	TBL3	TBL3.L;TBL3	TBL3	TBL3	TRANSDUCIN BETA-LIKE PROTEIN 3;TBL3	TBL3	TBL3_BOVIN;TBL3	PUTATIVE TRANSDUCIN BETA-LIKE PROTEIN 3;TBL3	TBL3_RAT	TRANSDUCIN BETA-LIKE PROTEIN 3
1631	PORTHOMCL1631[AjBfCgCiDrGgLvMmOjOlPsSpXl|(23 genes, 13 taxa)]:	-0.467582	-0.484176	-0.551044	-0.0831127	-0.464265	-0.471147	-0.916961	0.72986	0.621118	-0.726956	-0.769485	-0.420221	RIOX1;RIOX2	MINA;RIOX2	RIOX1;RIOX2	C14ORF169.L;MINA.L;RIOX2	RIOX1	RIOX1;MINAL;RIOX2	BIFUNCTIONAL LYSINE-SPECIFIC DEMETHYLASE AND HISTIDYL-HYDROXYLASE NO66-LIKE;BIFUNCTIONAL LYSINE-SPECIFIC DEMETHYLASE AND HISTIDYL-HYDROXYLASE MINA;RIOX2		MINA_HUMAN	HYPOTHETICAL PROTEIN;PUTATIVE BIFUNCTIONAL LYSINE-SPECIFIC DEMETHYLASE AND HISTIDYL-HYDROXYLASE NO66 ISOFORM X1;PUTATIVE BIFUNCTIONAL LYSINE-SPECIFIC DEMETHYLASE AND HISTIDYL-HYDROXYLASE MINA-LIKE;RIOX2	NO66_CHICK;MINA_HUMAN	BIFUNCTIONAL LYSINE-SPECIFIC DEMETHYLASE AND HISTIDYL-HYDROXYLASE NO66, TRANSCRIPT VARIANT X2; BIFUNCTIONAL LYSINE-SPECIFIC DEMETHYLASE AND HISTIDYL-HYDROXYLASE NO66, TRANSCRIPT VARIANT X1;BIFUNCTIONAL LYSINE-SPECIFIC DEMETHYLASE AND HISTIDYL-HYDROXYLASE MINA, TRANSCRIPT VARIANT X3; BIFUNCTIONAL LYSINE-SPECIFIC DEMETHYLASE AND HISTIDYL-HYDROXYLASE MINA, TRANSCRIPT VARIANT X1; BIFUNCTIONAL LYSINE-…
3283	PORTHOMCL3283[AjBfCgCiDrGgLvMmOjOlPsSpXl|(17 genes, 13 taxa)]:	-0.329341	-0.608923	-0.551429	-0.273578	-0.45027	-0.303206	-0.439935	-0.113566	-0.867647	-0.677853	-0.707598	-0.419458	DDX54	DDX54	DDX54	DDX54.L	DDX54	DDX54	ATP-DEPENDENT RNA HELICASE DDX54, TRANSCRIPT VARIANT X2;DDX54	DDX54;DDX27	DDX54_MOUSE;DDX54	PUTATIVE ATP-DEPENDENT RNA HELICASE DDX54;DDX54	DDX54_MOUSE;DDX54	ATP-DEPENDENT RNA HELICASE DDX54;DDX54
8716	PORTHOMCL8716[AjCgCiDrGgMmOjOlPsXl|(10 genes, 10 taxa)]:	-0.182527	-0.843341	-0.561648	-0.525432	-0.154706	-0.247882	-0.889247	0	-0.118706	0	0	-0.419256	RBM48	RBM48	RBM48	RBM48.S;RBM48	RBM48	RBM48	RNA-BINDING PROTEIN 48-LIKE;LOC100183170		RBM48_DANRE	HYPOTHETICAL PROTEIN;RBM48
3855	PORTHOMCL3855[AjBfCgCiDrGgLvMmOjOlPsSpXl|(16 genes, 13 taxa)]:	-0.338956	-0.930549	-0.525769	-0.000245098	-0.119093	-0.600265	-0.830545	0.477762	-0.851794	-0.671579	-0.726348	-0.419146	DPH5	DPH5	DPH5	DPH5.S;DPH5	DPH5	DPH5	DIPHTHINE METHYL ESTER SYNTHASE-LIKE, TRANSCRIPT VARIANT X1; DIPHTHINE METHYL ESTER SYNTHASE-LIKE, TRANSCRIPT VARIANT X2;DPH5	DPH5	DPH5_MOUSE;DPH5	DIPHTHINE SYNTHASE;DPH5	DPH5_HUMAN;DPH5	DPH5 HOMOLOG (S. CEREVISIAE)-LIKE;DPH5 HOMOLOG-LIKE;DPH5
1292	PORTHOMCL1292[AjBfCgCiDrGgLvMmOjOlPsSpXl|(26 genes, 13 taxa)]:	-0.25467	-0.830813	-0.62	-0.310441	-0.449191	-0.0471471	-0.756325	-0.872753	-0.393735	-0.802559	0.748652	-0.41871	MPP6;MPP2	MPP6	MPP6;MPP2	MPP6.S;LOC108705310;MPP2.S;MPP6	MAGUK P55 SUBFAMILY MEMBER 6;MPP6A;MPP2B;MPP2A;MPP6B	MPP6A;MPP6B;MPP2B;MPP2A	MAGUK P55 SUBFAMILY MEMBER 6-LIKE;MPP6	MPP6	MPP6_MOUSE;MPP2	PUTATIVE MAGUK P55 SUBFAMILY MEMBER 6	MPP6_MOUSE;CSKP_HUMAN;CASK	MAGUK P55 SUBFAMILY MEMBER 6, TRANSCRIPT VARIANT X2; MAGUK P55 SUBFAMILY MEMBER 6, TRANSCRIPT VARIANT X1;MPP2
6760	PORTHOMCL6760[AjCgCiDrGgMmOjOlPsSpXl|(13 genes, 11 taxa)]:	-0.569121	-0.754505	-0.534341	-0.105172	-0.442917	-0.105794	-0.610364	0	-0.802912	0	-0.13223	-0.418642	LYAR	LYAR	LYAR	LYAR.S;LYAR.L;LYAR	LYAR	LYAR	CELL GROWTH-REGULATING NUCLEOLAR PROTEIN-LIKE;LYAR		LYAR_RAT;LYAR	PUTATIVE CELL GROWTH-REGULATING NUCLEOLAR PROTEIN;PUTATIVE E3 UBIQUITIN-PROTEIN LIGASE RBBP6;LYAR		E3 UBIQUITIN-PROTEIN LIGASE RBBP6
8417	PORTHOMCL8417[CgCiDrGgLvMmOjOlPsSpXl|(11 genes, 11 taxa)]:	-0.487527	-0.677407	-0.533462	-0.0944363	-0.349853	-0.368853	-0.169935	0	0.854206	0.292962	-0.0656863	-0.41859	STX18	STX18	STX18	STX18.S;STX18	STX18	STX18	SYNTAXIN-18;STX18		STX18_DANRE;STX18		STX18_PONAB	SYNTAXIN-18;STX18
7684	PORTHOMCL7684[BfCgCiDrGgMmOjOlPsSpXl|(12 genes, 11 taxa)]:	-0.264396	-0.657538	-0.50033	-0.0689706	-0.253775	-0.766265	-0.304026	-0.169833	-0.321382	0	-0.529902	-0.418546	PSMG2	PSMG2	PSMG2	PSMG2.L;PSMG2	PSMG2	PSMG2	PROTEASOME ASSEMBLY CHAPERONE 2-LIKE	PSMG2	PSMG2_DANRE;PSMG2			PROTEASOME ASSEMBLY CHAPERONE 2;PROTEASOME ASSEMBLY CHAPERONE 2-LIKE
215	PORTHOMCL215[AjBfCgCiDrGgLvMmOjOlPsSpXl|(70 genes, 13 taxa)]:	-0.176538	-0.916879	-0.349396	-0.459681	-0.426397	-0.180589	0.664727	-0.41986	-0.329	0.036388	0.000367647	-0.418247	TCTEX1D4;TCTE3;TCTEX1D2	TCTEX1D1;TCTEX1D2;TCTEX1D4	TCTEX1D1;TCTEX1D2;TCTEX1D4;TCTE3;GM3448	TCTEX1D1.S;LOC108715565;TCTEX1D2.L;TCTEX1D1.L;LOC108705240;LOC108715686;TCTEX1D4;TCTEX1D2;TCTEX1D1	TCTEX1D2	TCTEX1D1;TCTEX1D2	TCTEX1 DOMAIN-CONTAINING PROTEIN 1-LIKE;DYNEIN LIGHT CHAIN, TRANSCRIPT VARIANT X1; DYNEIN LIGHT CHAIN;TCTEX1 DOMAIN-CONTAINING PROTEIN 2-LIKE;TCTEX1 DOMAIN-CONTAINING PROTEIN 1-B-LIKE;TCTEX1 DOMAIN-CONTAINING PROTEIN 2;TCTEX1D2;TCTEX1D1;LOC100183423	TCTEX1D1;TCTEX1D2	TC1D1_DANRE;TC1D2_HUMAN;TC1DB_XENLA;TCTEX1D2;TCTEX1D1	PUTATIVE TCTEX1 DOMAIN-CONTAINING PROTEIN 1-B-LIKE;HYPOTHETICAL PROTEIN;PUTATIVE TCTEX1 DOMAIN-CONTAINING PROTEIN 1-LIKE;PUTATIVE TCTEX1 DOMAIN-CONTAINING PROTEIN 2-LIKE ISOFORM X2;PUTATIVE TCTEX1 DOMAIN-CONTAINING PROTEIN 1-B;TCTEX1 DOMAIN CONTAINING 1;TCTEX1D2;TCTEX1D1	RIC1_MOUSE;TC1D1_DANRE;RIC1	TCTEX1 DOMAIN-CONTAINING PROTEIN 2;TCTEX1 DOMAIN-CONTAINING PROTEIN 1-B, TRANSCRIPT VARIANT X1; TCTEX1 DOMAIN-CONTAINING PROTEIN 1-B, TRANSCRIPT VARIANT X2;UNCHARACTERIZED LOC105440591;TCTEX1D2
6568	PORTHOMCL6568[AjBfCgCiDrGgLvMmOjOlPsSpXl|(13 genes, 13 taxa)]:	-0.130989	-0.832527	-0.836099	-0.155797	-0.109118	-0.444118	-0.71839	-0.300234	-0.442588	0.203385	0.285539	-0.418108		KIAA0825	2210408I21RIK	KIAA0825.L	KIAA0825 ORTHOLOG	SI:CH73-280O22.2	UNCHARACTERIZED PROTEIN KIAA0825-LIKE		K0825_HUMAN	HYPOTHETICAL PROTEIN	K0825_HUMAN	UNCHARACTERIZED PROTEIN KIAA0825
2827	PORTHOMCL2827[AjBfCgCiDrGgLvMmOlPsSpXl|(18 genes, 12 taxa)]:	-0.489945	-0.710901	-0.550055	-0.312132	-0.176127	-0.267088	-0.836065	0.578741	0	0.527864	0.521324	-0.417708	LSM7	LSM7	LSM7;GM10146	LOC108706793;LSM7.L;LSM7	LSM7	LSM7	U6 SNRNA-ASSOCIATED SM-LIKE PROTEIN LSM7, TRANSCRIPT VARIANT X1;LSM7	LSM7		PUTATIVE U6 SNRNA-ASSOCIATED SM-LIKE PROTEIN LSM7;LSM7	LSM7_MOUSE	LSM7 HOMOLOG, U6 SMALL NUCLEAR RNA ASSOCIATED (S. CEREVISIAE)-LIKE;LSM7
8980	PORTHOMCL8980[BfDrGgMmOjOlPsXl|(10 genes, 8 taxa)]:	-0.656322	-0.492653	-0.439435	-0.348916	-0.20752	-0.35848	0	-0.102238	0.361494	0	0	-0.417221	EVX1	EVX1	EVX1	LOC108719933;EVX1	EVX1	EVX1			EVX1_HUMAN;EVX1
1834	PORTHOMCL1834[AjCgCiDrGgLvMmOjOlPsSpXl|(22 genes, 12 taxa)]:	-0.177692	-0.734286	-0.632363	-0.411789	-0.377206	-0.166676	0.273636	0	-0.546647	-0.791104	-0.404534	-0.416669	DHX29	DHX29;DHX36	DHX29;DHX36	DHX29.L;LOC108717046;DHX29;DHX36	DHX29;DHX36	DHX29;DHX36	ATP-DEPENDENT RNA HELICASE DHX36;DHX36		DHX29_XENLA;DHX36_HUMAN;DHX29;DHX36	PUTATIVE ATP-DEPENDENT RNA HELICASE DHX29;PUTATIVE ATP-DEPENDENT RNA HELICASE DHX36;DHX29	DHX29_XENLA;DHX36_MOUSE;DHX29;DHX36	ATP-DEPENDENT RNA HELICASE DHX29;ATP-DEPENDENT RNA HELICASE DHX36;DHX29
606	PORTHOMCL606[BfCgCiDrGgLvMmOjOlPsSpXl|(38 genes, 12 taxa)]:	-0.664835	-0.650769	-0.512143	-0.423505	-0.138676	-0.108176	-0.843169	-0.23972	0.518765	-0.0930857	0.232475	-0.416351	YWHAZ;YWHAB;YWHAQ	YWHAZ;YWHAB;YWHAQ	YWHAZ;YWHAB	YWHAB.S;YWHAZ.L;YWHAB.L;YWHAZ.S;YWHAB;YWHAZ	14-3-3 PROTEIN BETA/ALPHA-1;14-3-3 PROTEIN ZETA;14-3-3 PROTEIN BETA/ALPHA-B;YWHAQB;YWHAZ;YWHAQ	YWHABB;YWHABL;YWHAZ;YWHAQA;YWHABA	14-3-3-LIKE PROTEIN 2;YWHAQ	YWHAQ;SFN;YWHAB	1433B_PONAB;143BB_DANRE;YWHAB		14332_CAEEL	14-3-3-LIKE PROTEIN 2;14-3-3-LIKE PROTEIN;YWHAQ;YWHAB
6681	PORTHOMCL6681[AjBfCgCiDrGgLvMmOjOlPsSpXl|(13 genes, 13 taxa)]:	-0.571648	-0.578066	-0.569231	-0.421838	-0.157426	-0.199853	-0.773247	0.165105	-0.871647	-0.753911	-0.842525	-0.416344	ORC2	ORC2	ORC2	ORC2.S;ORC2	ORC2	ORC2	ORIGIN RECOGNITION COMPLEX SUBUNIT 2-LIKE;ORC2	ORC2	ORC2_HUMAN;ORC2	PUTATIVE ORIGIN RECOGNITION COMPLEX SUBUNIT 2-LIKE;ORC2	ORC2_XENLA	ORIGIN RECOGNITION COMPLEX SUBUNIT 2;ORC2
5142	PORTHOMCL5142[AjBfCgCiDrGgLvMmOjOlPsSpXl|(14 genes, 13 taxa)]:	-0.191593	-0.179692	-0.641593	-0.412083	-0.375074	-0.694882	-0.901182	0.213486	0.418853	-0.730464	-0.523162	-0.41582	MVD	MVD	MVD	MVD.L;MVD	MVDA;MVD	MVDA;MVDB;MVD	DIPHOSPHOMEVALONATE DECARBOXYLASE-LIKE;MVD	MVD	MVD1_RAT;MVD	PUTATIVE DIPHOSPHOMEVALONATE DECARBOXYLASE-LIKE;MVD	MVD1_MOUSE	DIPHOSPHOMEVALONATE DECARBOXYLASE;MVD
5924	PORTHOMCL5924[AjBfCgCiDrGgLvMmOjOlPsSpXl|(14 genes, 13 taxa)]:	-0.514945	-0.227912	-0.180879	-0.494877	-0.322794	-0.738824	-0.796818	0.38979	-0.654088	-0.0244582	-0.659926	-0.413372	SLC38A10	SLC38A10	SLC38A10	SLC38A10.S;SLC38A10	SLC38A10	SLC38A10	PUTATIVE SODIUM-COUPLED NEUTRAL AMINO ACID TRANSPORTER 10		S38AA_HUMAN	HYPOTHETICAL PROTEIN	S38AA_PONAB	PUTATIVE SODIUM-COUPLED NEUTRAL AMINO ACID TRANSPORTER 10
8999	PORTHOMCL8999[BfDrGgMmOlPsXl|(10 genes, 7 taxa)]:	-0.392857	-0.492923	-0.744286	-0.242598	-0.475319	-0.129765	0	-0.755035	0	0	0	-0.412958	ELF2	ELF2	ELF2	ELF2.S;ELF2	ELF2B;ELF2	ELF2A;ELF2B;ELF2
8096	PORTHOMCL8096[AjCgCiDrGgLvMmOjOlPsXl|(11 genes, 11 taxa)]:	-0.380604	-0.676396	-0.523187	-0.0205147	-0.466471	-0.402735	-0.615636	0	-0.213294	-0.515666	0	-0.411651	EIF2S3	EIF2S3	EIF2S3X;EIF2S3	EIF2S3.S	EIF2S3	EIF2S3	EUKARYOTIC TRANSLATION INITIATION FACTOR 2 SUBUNIT 3;EIF2S3		IF2G_BOVIN	PUTATIVE EUKARYOTIC TRANSLATION INITIATION FACTOR 2 SUBUNIT 3	IF2G_CHICK
5294	PORTHOMCL5294[AjBfCgCiDrGgLvMmOlPsSpXl|(14 genes, 12 taxa)]:	-0.377363	-0.843077	-0.618791	-0.226176	-0.162181	-0.241147	-0.802286	-0.0325874	0	-0.787595	-0.690441	-0.411456	SPDL1	SPDL1	SPDL1	SPDL1.L;SPDL1.S	SPDL1	SPDL1	PROTEIN SPINDLY-LIKE			HYPOTHETICAL PROTEIN	SPDLA_XENLA	PROTEIN SPINDLY-A, TRANSCRIPT VARIANT X2; PROTEIN SPINDLY-A, TRANSCRIPT VARIANT X1;PROTEIN SPINDLY-B
4028	PORTHOMCL4028[AjBfCgCiDrGgLvMmOjOlPsSpXl|(16 genes, 13 taxa)]:	-0.322692	-0.622022	-0.502747	-0.299583	-0.287598	-0.426971	-0.860091	-0.595594	-0.146176	-0.777647	-0.647333	-0.410269	RRP7A	RRP7A	RRP7A	RRP7A.S;RRP7A	RRP7A	RRP7A	RIBOSOMAL RNA-PROCESSING PROTEIN 7 HOMOLOG A-LIKE, TRANSCRIPT VARIANT X2; RIBOSOMAL RNA-PROCESSING PROTEIN 7 HOMOLOG A-LIKE, TRANSCRIPT VARIANT X1	RRP7A	RRP7A_MOUSE;RRP7A	PUTATIVE RIBOSOMAL RNA-PROCESSING PROTEIN 7-LIKE A	RRP7A_MOUSE;RRP7A	RIBOSOMAL RNA-PROCESSING PROTEIN 7 HOMOLOG A;RRP7A
11598	PORTHOMCL11598[DrGgMmOlPsXl|(7 genes, 6 taxa)]:	-0.263132	-0.81389	-0.547308	-0.176299	-0.51027	-0.148353	0	0	0	0	0	-0.409875	URI1	URI1	URI1	URI1.S;URI1.L;URI1	URI1	URI1
11772	PORTHOMCL11772[DrGgMmOlPsXl|(7 genes, 6 taxa)]:	-0.12544	-0.480527	-0.758571	-0.285319	-0.686373	-0.121676	0	0	0	0	0	-0.409651	PCF11	PCF11	PCF11	PCF11.S;PCF11	PCF11	PCF11
6309	PORTHOMCL6309[AjBfCgDrGgLvMmOjOlPsSpXl|(13 genes, 12 taxa)]:	-0.228791	-0.805011	-0.430495	-0.821624	-0.150882	-0.0163735	0	-0.738565	0.345765	-0.835335	-0.759289	-0.408863	PDSS2	PDSS2	PDSS2	PDSS2.S;PDSS2	PDSS2	PDSS2		PDSS2	DLP1_HUMAN;PDSS2	PRENYL (DECAPRENYL) DIPHOSPHATE SYNTHASE, SUBUNIT 2;HYPOTHETICAL PROTEIN	DLP1_RAT	DECAPRENYL-DIPHOSPHATE SYNTHASE SUBUNIT 2;PDSS2
9743	PORTHOMCL9743[DrGgMmOjOlPsXl|(9 genes, 7 taxa)]:	-0.408187	-0.46778	-0.751813	-0.139191	-0.419273	-0.257971	0	0	0.833232	0	0	-0.407369	OGFR	OGFR	OGFR	LOC108702031	OGFR	OGFR;ZGC:162182;OGFRL2			OGRL1_HUMAN;OGFR
6811	PORTHOMCL6811[AjBfCgCiDrGgLvMmOjOlPsSpXl|(13 genes, 13 taxa)]:	-0.591099	-0.514813	-0.547857	-0.203186	-0.472721	-0.114	-0.813883	0.431958	-0.571412	-0.459135	-0.411765	-0.407279	TTC1	TTC1	TTC1	TTC1.S;TTC1	TTC1	TTC1	TETRATRICOPEPTIDE REPEAT PROTEIN 1-LIKE;TTC1		TTC1_MOUSE	PUTATIVE TETRATRICOPEPTIDE REPEAT PROTEIN 1;TTC1	TTC1_MOUSE	TETRATRICOPEPTIDE REPEAT PROTEIN 1;TTC1
3759	PORTHOMCL3759[AjBfCgCiDrGgLvMmOjOlPsSpXl|(16 genes, 13 taxa)]:	-0.52522	-0.451253	-0.396319	-0.400123	-0.205025	-0.465735	-0.746506	-0.0762482	-0.607941	0.0453664	-0.332353	-0.407279	EXOC7	EXOC7	EXOC7	EXOC7.L;EXOC7	EXOC7	EXOC7	EXOCYST COMPLEX COMPONENT 7, TRANSCRIPT VARIANT X1; EXOCYST COMPLEX COMPONENT 7, TRANSCRIPT VARIANT X2; EXOCYST COMPLEX COMPONENT 7, TRANSCRIPT VARIANT X3;EXOC7	EXOC7	EXOC7_RAT;EXOC7	HYPOTHETICAL PROTEIN;PUTATIVE EXOCYST COMPLEX COMPONENT 7;EXOC7	EXOC7_RAT	EXOCYST COMPLEX COMPONENT 7;EXOC7
7165	PORTHOMCL7165[AjBfCgCiDrGgMmOjOlPsSpXl|(12 genes, 12 taxa)]:	-0.508571	-0.738681	-0.596484	-0.0350245	-0.4125	-0.151735	-0.86761	-0.705697	-0.402794	0	-0.428309	-0.407166	PEX1	PEX1	PEX1	PEX1.L;PEX1	PEX1	PEX1	PEROXISOME BIOGENESIS PROTEIN 1-LIKE		PEX1_HUMAN	PUTATIVE PEROXISOME BIOGENESIS FACTOR 1		PEROXISOME BIOGENESIS FACTOR 1
2254	PORTHOMCL2254[AjBfCgCiDrGgLvMmOjOlPsSpXl|(20 genes, 13 taxa)]:	-0.446429	-0.678286	-0.547637	-0.36625	-0.317328	-0.0849412	-0.196364	-0.651811	-0.372971	-0.692755	-0.54473	-0.406812	HEATR1	HEATR1	HEATR1	HEATR1.S;HEATR1	HEATR1	HEATR1	HEAT REPEAT-CONTAINING PROTEIN 1, TRANSCRIPT VARIANT X1; HEAT REPEAT-CONTAINING PROTEIN 1, TRANSCRIPT VARIANT X2;HEAT REPEAT-CONTAINING PROTEIN 1;LOC100175808	HEATR1	HEAT1_DANRE	PUTATIVE HEAT REPEAT-CONTAINING PROTEIN 1	HEAT1_DANRE	HEAT REPEAT-CONTAINING PROTEIN 1;UNCHARACTERIZED LOC577264
4559	PORTHOMCL4559[AjBfCgCiDrGgLvMmOjOlPsSpXl|(15 genes, 13 taxa)]:	-0.559725	-0.66589	-0.48456	-0.00740196	-0.520564	-0.202265	-0.804675	0.546853	-0.573706	-0.747926	-0.463971	-0.406734	RRP15	RRP15	RRP15	RRP15.S;LOC108716459;RRP15	RRP15	RRP15	RRP15-LIKE PROTEIN;RRP15	RRP15	RRP15_RAT	PUTATIVE RRP15-LIKE PROTEIN;RRP15	RRP15_HUMAN;RRP15	RRP15-LIKE PROTEIN;RRP15
5794	PORTHOMCL5794[AjBfCgCiDrGgLvMmOjOlPsSpXl|(14 genes, 13 taxa)]:	-0.355714	-0.727956	-0.460495	-0.415466	-0.191373	-0.288618	-0.619675	-0.195455	-0.839088	-0.277688	-0.647794	-0.406603	SSU72	SSU72	SSU72	SSU72.L;SSU72	SSU72	SSU72	RNA POLYMERASE II SUBUNIT A C-TERMINAL DOMAIN PHOSPHATASE SSU72, TRANSCRIPT VARIANT X2; RNA POLYMERASE II SUBUNIT A C-TERMINAL DOMAIN PHOSPHATASE SSU72, TRANSCRIPT VARIANT X1;SSU72	SSU72	SSU72_CHICK;SSU72_DANRE	PUTATIVE RNA POLYMERASE II SUBUNIT A C-TERMINAL DOMAIN PHOSPHATASE SSU72	SSU72_XENLA;SSU72	RNA POLYMERASE II SUBUNIT A C-TERMINAL DOMAIN PHOSPHATASE SSU72;SSU72
5399	PORTHOMCL5399[AjBfCgCiDrGgLvMmOjOlPsSpXl|(14 genes, 13 taxa)]:	-0.0495604	-0.316615	-0.514451	-0.171005	-0.710564	-0.666765	0.509416	0.53049	0.751647	-0.880764	-0.857721	-0.404827	SSR3	SSR3	SSR3	SSR3.L;SSR3.S;SSR3	SSR3;SSRG	SSR3;SSRG	TRANSLOCON-ASSOCIATED PROTEIN SUBUNIT GAMMA-LIKE;SSR3	SSR3	SSRG_RAT	PUTATIVE TRANSLOCON-ASSOCIATED PROTEIN SUBUNIT GAMMA;SSRG	CHD5_RAT	TRANSLOCON-ASSOCIATED PROTEIN SUBUNIT GAMMA
7187	PORTHOMCL7187[AjBfCiDrGgLvMmOjOlPsSpXl|(12 genes, 12 taxa)]:	-0.31456	-0.377846	-0.195714	-0.47701	-0.340196	-0.7175	-0.814935	0.0145455	0.317824	-0.109494	-0.311275	-0.403804	COMMD9	COMMD9	COMMD9	COMMD9	COMMD9	COMMD9	COMM DOMAIN-CONTAINING PROTEIN 9;LOC100178405	COMMD9	COMD9_MOUSE	PUTATIVE COMM DOMAIN-CONTAINING PROTEIN 9-LIKE;COMMD9	COMD9_BOVIN	COMM DOMAIN-CONTAINING PROTEIN 9, TRANSCRIPT VARIANT X1; COMM DOMAIN-CONTAINING PROTEIN 9, TRANSCRIPT VARIANT X2;COMMD9
2041	PORTHOMCL2041[AjBfCgCiDrGgLvMmOjOlPsSpXl|(21 genes, 13 taxa)]:	-0.461209	-0.55178	-0.548462	-0.220711	-0.317475	-0.316676	0.431571	-0.276195	-0.802941	-0.487719	-0.743627	-0.402719	WDR3	WDR3	WDR3	WDR3.S;WDR3		WDR3	WD REPEAT-CONTAINING PROTEIN 3;WDR3	WDR3	WDR3_MOUSE;WDR3_HUMAN;WDR3	HYPOTHETICAL PROTEIN;PUTATIVE WD REPEAT-CONTAINING PROTEIN 3;WDR3	WDR3_MOUSE;WDR3	WD REPEAT-CONTAINING PROTEIN 3;WD REPEAT-CONTAINING PROTEIN 3-LIKE;WDR3
11018	PORTHOMCL11018[DrGgMmOlPsXl|(7 genes, 6 taxa)]:	-0.0393956	-0.200352	-0.693077	-0.201288	-0.774644	-0.505441	0	0	0	0	0	-0.402366	ID3	ID3	ID3	ID3.S;ID3.L;ID3	ID3	ID3
8089	PORTHOMCL8089[AjBfCgDrGgMmOjOlPsSpXl|(11 genes, 11 taxa)]:	-0.0939011	-0.602242	-0.550824	-0.256275	-0.388162	-0.522324	0	-0.43021	0.140029	0	0.364583	-0.402288	ZNF830	ZNF830	ZFP830;ZNF830	ZNF830.S;ZNF830	ZNF830	CABZ01111913.1			ZN830_HUMAN;ZNF830	PUTATIVE ZINC FINGER PROTEIN		ZINC FINGER PROTEIN 830, TRANSCRIPT VARIANT X2; ZINC FINGER PROTEIN 830, TRANSCRIPT VARIANT X1; ZINC FINGER PROTEIN 830, TRANSCRIPT VARIANT X3;ZNF830
7044	PORTHOMCL7044[AjCgDrGgMmOjOlPsSpXl|(12 genes, 10 taxa)]:	-0.348681	-0.54189	-0.553901	-0.304289	-0.612328	-0.0510882	0	0	-0.840853	0	0.276225	-0.40203	LIG3	LIG3	LIG3	LIG3.L;LIG3	LIG3	LIG3			DNLI3_HUMAN	PUTATIVE DNA LIGASE 3-LIKE;LIG3		DNA LIGASE 3, TRANSCRIPT VARIANT X1
7074	PORTHOMCL7074[AjBfCgCiDrGgMmOjOlPsSpXl|(12 genes, 12 taxa)]:	-0.00576923	-0.612484	-0.518956	-0.346348	-0.116593	-0.810941	0.693506	0.115327	0.115647	0	-0.0301471	-0.401849	PIN4	PIN4	PIN4	PIN4.L;PIN4	PIN4	PIN4	PEPTIDYL-PROLYL CIS-TRANS ISOMERASE NIMA-INTERACTING 4-LIKE;PIN4		PIN4_DANRE;PIN4	HYPOTHETICAL PROTEIN;PIN4		PEPTIDYL-PROLYL CIS-TRANS ISOMERASE NIMA-INTERACTING 4;PIN4
2535	PORTHOMCL2535[AjBfCgCiDrGgLvMmOjOlPsSpXl|(19 genes, 13 taxa)]:	-0.481758	-0.678681	-0.507473	-0.253725	-0.459608	-0.0287941	-0.714364	0.793706	-0.913882	-0.409102	-0.683701	-0.401673	NAT10	NAT10	NAT10	NAT10.L;NAT10	NAT10	NAT10	RNA CYTIDINE ACETYLTRANSFERASE;NAT10	NAT10	NAT10_MOUSE	PUTATIVE N-ACETYLTRANSFERASE 10;PUTATIVE N-ACETYLTRANSFERASE 10-LIKE;HYPOTHETICAL PROTEIN;NAT10	NAT10_HUMAN	N-ACETYLTRANSFERASE 10;NAT10
5709	PORTHOMCL5709[AjBfCiDrGgLvMmOjOlPsSpXl|(14 genes, 12 taxa)]:	-0.00263736	-0.814066	-0.512088	-0.0131863	-0.476446	-0.591324	0.328013	-0.866409	-0.5625	-0.868958	-0.653064	-0.401625	SLC35A1	SLC35A1	SLC35A1	SLC35A1.S;SLC35A1.L;SLC35A1	SLC35A1	SLC35A1	CMP-SIALIC ACID TRANSPORTER-LIKE;SLC35A1	SLC35A1	S35A1_HUMAN;SLC35A1	PUTATIVE CMP-SIALIC ACID TRANSPORTER-LIKE;SLC35A2	S35A1_HUMAN;SLC35A1	CMP-SIALIC ACID TRANSPORTER-LIKE;CMP-SIALIC ACID TRANSPORTER, TRANSCRIPT VARIANT X4; CMP-SIALIC ACID TRANSPORTER, TRANSCRIPT VARIANT X2; CMP-SIALIC ACID TRANSPORTER, TRANSCRIPT VARIANT X1; CMP-SIALIC ACID TRANSPORTER, TRANSCRIPT VARIANT X3;SLC35A1;SLC35A3
6834	PORTHOMCL6834[AjCiDrGgMmOlPsSpXl|(13 genes, 9 taxa)]:	-0.109835	-0.695341	-0.20011	-0.4975	-0.174804	-0.732	-0.08	0	0	0	0.352574	-0.401598	ATP5J;ATP5PF	ATP5J;ATP5PF	ATP5J;ATP5PF	ATP5J.L;ATP5J.S;ATP5PF	ATP5PF;SI:CH211-140M22.7;ATP5J	ATP5J;SI:CH211-140M22.7;SI:DKEY-22N8.3	ATP SYNTHASE-COUPLING FACTOR 6, MITOCHONDRIAL-LIKE, TRANSCRIPT VARIANT X1; ATP SYNTHASE-COUPLING FACTOR 6, MITOCHONDRIAL-LIKE, TRANSCRIPT VARIANT X2			PUTATIVE ATP SYNTHASE-COUPLING FACTOR 6, MITOCHONDRIAL;ATP5PF		ATP SYNTHASE-COUPLING FACTOR 6, MITOCHONDRIAL;ATP5PF
7871	PORTHOMCL7871[AjBfDrGgLvMmOjOlPsSpXl|(11 genes, 11 taxa)]:	-0.375055	-0.104352	-0.550604	-0.226716	-0.43001	-0.722206	0	-0.629065	-0.585824	0.0188235	0.155428	-0.40149	C12ORF65;CUNH12ORF65	C12ORF65;CUNH12ORF65	2810006K23RIK;CUNH12ORF65	C12ORF65.L;CUNH12ORF65	SI:CH211-275J6.5	SI:CH211-275J6.5			CL065_DANRE	PUTATIVE PEPTIDE CHAIN RELEASE FACTOR C12ORF65-LIKE, MITOCHONDRIAL	CL065_DANRE	PROBABLE PEPTIDE CHAIN RELEASE FACTOR C12ORF65 HOMOLOG, MITOCHONDRIAL
5942	PORTHOMCL5942[AjCgCiDrGgLvMmOjOlPsSpXl|(14 genes, 12 taxa)]:	-0.397473	-0.834242	-0.529231	-0.17576	-0.25326	-0.216088	-0.843857	0	-0.755118	-0.603912	-0.51973	-0.401009	NOM1	NOM1	NOM1	NOM1.L;NOM1	NOM1	NOM1	NUCLEOLAR MIF4G DOMAIN-CONTAINING PROTEIN 1;NOM1		NOM1_MOUSE;NOM1	PUTATIVE NUCLEOLAR MIF4G DOMAIN-CONTAINING PROTEIN 1 ISOFORM X3	NOM1_HUMAN;NOM1_MOUSE	NUCLEOLAR MIF4G DOMAIN-CONTAINING PROTEIN 1, TRANSCRIPT VARIANT X3; NUCLEOLAR MIF4G DOMAIN-CONTAINING PROTEIN 1, TRANSCRIPT VARIANT X1; NUCLEOLAR MIF4G DOMAIN-CONTAINING PROTEIN 1, TRANSCRIPT VARIANT X2;NUCLEOLAR MIF4G DOMAIN-CONTAINING PROTEIN 1;NOM1
5757	PORTHOMCL5757[AjBfCgCiDrGgLvMmOjOlPsSpXl|(14 genes, 13 taxa)]:	-0.268297	-0.540527	-0.341593	-0.0775245	-0.723531	-0.451735	0.121455	0.361608	-0.385441	-0.747678	-0.675	-0.400535	APRT	APRT	APRT	APRT.L;APRT	APRT	APRT	ADENINE PHOSPHORIBOSYLTRANSFERASE-LIKE;APT	APT	APT_DROPS;APT	HYPOTHETICAL PROTEIN;APT	TNG6_MOUSE	ADENINE PHOSPHORIBOSYLTRANSFERASE
4644	PORTHOMCL4644[AjBfCgCiDrGgLvMmOjOlPsSpXl|(15 genes, 13 taxa)]:	-0.434341	-0.463824	-0.520055	-0.120221	-0.288382	-0.571853	-0.893571	-0.629096	-0.487324	-0.236636	-0.353309	-0.399779	RRAGA	RRAGA	RRAGA;RRAGB	RRAGA.L;RRAGA.S;RRAGA	RRAGA	RRAGA	RAS-RELATED GTP-BINDING PROTEIN A-LIKE;RRAGA	RRAGA	RRAGA_RAT	PUTATIVE RAS-RELATED GTP-BINDING PROTEIN A-LIKE;RRAGA	RRAGA_RAT;RRAGA	RAS-RELATED GTP-BINDING PROTEIN A, TRANSCRIPT VARIANT X1; RAS-RELATED GTP-BINDING PROTEIN A, TRANSCRIPT VARIANT X2;RRAGA
1862	PORTHOMCL1862[AjBfCgCiDrGgLvMmOjOlPsSpXl|(22 genes, 13 taxa)]:	-0.431209	-0.59644	-0.57967	-0.264951	-0.475809	-0.0487059	-0.531506	-0.902171	-0.6055	-0.824314	-0.190074	-0.399464	CNOT1	CNOT1	CNOT1	CNOT1.L;CNOT1.S;CNOT1	CNOT1	CNOT1	CCR4-NOT TRANSCRIPTION COMPLEX SUBUNIT 1		CNOT1_MOUSE;CNOT1	PUTATIVE CCR4-NOT TRANSCRIPTION COMPLEX;PUTATIVE CCR4-NOT TRANSCRIPTION COMPLEX SUBUNIT 1 ISOFORM X9	CNOT1_DANRE;CNOT1_XENTR	CCR4-NOT TRANSCRIPTION COMPLEX SUBUNIT 1;CCR4-NOT TRANSCRIPTION COMPLEX SUBUNIT 1-LIKE, TRANSCRIPT VARIANT X2; CCR4-NOT TRANSCRIPTION COMPLEX SUBUNIT 1-LIKE, TRANSCRIPT VARIANT X1;CCR4-NOT TRANSCRIPTION COMPLEX SUBUNIT 1-LIKE
1197	PORTHOMCL1197[AjBfCgCiDrGgLvMmOjOlPsSpXl|(27 genes, 13 taxa)]:	-0.450659	-0.549363	-0.606648	-0.139216	-0.592255	-0.0566176	-0.865974	-0.763497	-0.405765	-0.662064	-0.458211	-0.399126	HBS1L	HBS1L	HBS1L	HBS1L.L;HBS1L	HBS1L	HBS1L	HBS1-LIKE PROTEIN;HBS1L	HBS1L	HBS1L_HUMAN	HYPOTHETICAL PROTEIN;PUTATIVE HBS1-LIKE PROTEIN	HBS1L_PONAB	EUKARYOTIC PEPTIDE CHAIN RELEASE FACTOR GTP-BINDING SUBUNIT ERF3A;HBS1-LIKE PROTEIN
6203	PORTHOMCL6203[AjBfCgCiDrGgMmOjOlPsSpXl|(13 genes, 12 taxa)]:	-0.16	-0.69556	-0.668462	-0.13875	-0.475172	-0.253324	0.585961	0.225594	-0.648618	0	-0.467157	-0.398545	C7ORF26	C7ORF26	E130309D02RIK	C7ORF26.L	ZGC:56409	ZGC:56409	UNCHARACTERIZED PROTEIN C7ORF26 HOMOLOG		CG026_MOUSE	HYPOTHETICAL PROTEIN		UNCHARACTERIZED PROTEIN C7ORF26 HOMOLOG
1804	PORTHOMCL1804[AjBfCgCiDrGgLvMmOjOlPsSpXl|(22 genes, 13 taxa)]:	-0.00642857	-0.892879	-0.828077	-0.0223284	-0.248431	-0.391706	-0.139221	-0.799231	-0.786206	0.112281	-0.239828	-0.398308	GPR161	GPR161	GPR161	LOC108697932;LOC108697265;HTR7;GPR161	SI:CH211-237C6.4;GPR161	GPR161;GPR161 (1 OF MANY)	G-PROTEIN COUPLED RECEPTOR 161;UNCHARACTERIZED LOC100176943, TRANSCRIPT VARIANT X1; UNCHARACTERIZED LOC100176943, TRANSCRIPT VARIANT X2;LOC100182017	GPR161	GP161_HUMAN	PUTATIVE G-PROTEIN COUPLED RECEPTOR	GP161_MOUSE;OPSD1_MIZYE	G-PROTEIN COUPLED RECEPTOR 161;ALPHA-1A ADRENERGIC RECEPTOR-LIKE
7601	PORTHOMCL7601[AjBfDrGgLvMmOlPsSpXl|(12 genes, 10 taxa)]:	-0.0389822	-0.466154	-0.692747	-0.31045	-0.164087	-0.715706	0	-0.794396	0	0.734249	0.37685	-0.398021	FOXF2	FOXF2	FOXF2	FOXF2.L;FOXF2	FOXF2;FOXF2A	FOXF2A;FOXF2B;FOXF2		FOXF1		PUTATIVE FORKHEAD BOX PROTEIN F1-A-LIKE	FXF1B_XENLA	FORKHEAD BOX PROTEIN F1-A-LIKE;FOXF2
5574	PORTHOMCL5574[AjBfCgCiDrGgLvMmOjOlPsSpXl|(14 genes, 13 taxa)]:	-0.400385	-0.463253	-0.553352	-0.156054	-0.582794	-0.230382	-0.802182	0.509269	-0.892	-0.817915	-0.743382	-0.397703	PABPC4	PABPC1L	RBM28	RBM28.L;RBM28	RBM28	RBM28	RNA-BINDING PROTEIN 28;RBM28	LOC106181816	RBM28_MOUSE	PUTATIVE RNA-BINDING PROTEIN 28	RBM28_MOUSE	RNA-BINDING PROTEIN 28;RBM28
8637	PORTHOMCL8637[AjBfCgDrGgMmOjOlPsXl|(10 genes, 10 taxa)]:	-0.427967	-0.631604	-0.545934	-0.241005	-0.267451	-0.261618	0	0.114767	-0.776029	0	0	-0.39593	RPS19BP1	RPS19BP1	RPS19BP1	RPS19BP1.L;RPS19BP1	RPS19BP1;CABZ01084579.1	RPS19BP1				HYPOTHETICAL PROTEIN
2549	PORTHOMCL2549[AjBfCgCiDrGgLvMmOjOlPsSpXl|(19 genes, 13 taxa)]:	-0.0936264	-0.716088	-0.773571	-0.250588	-0.445662	-0.0955882	-0.776195	-0.20604	-0.794647	-0.886151	-0.27451	-0.395854	NF1	NF1	NF1	LOC108709669	NF1	NF1B;NF1A	NEUROFIBROMIN-LIKE;NEUROFIBROMIN	NF1	NF1_RAT	PUTATIVE NEUROFIBROMIN;PUTATIVE NEUROFIBROMIN-LIKE	NF1_RAT;NF1_HUMAN	NEUROFIBROMIN-LIKE;NEUROFIBROMIN
10357	PORTHOMCL10357[BfDrGgMmOlPsSpXl|(8 genes, 8 taxa)]:	-0.277692	-0.783121	-0.538571	-0.317328	-0.128088	-0.329147	0	0.764895	0	0	-0.404779	-0.395658	RBM34	RBM34	RBM34	RBM34.L;RBM34	RBM34	RBM34		RBM34				RNA-BINDING PROTEIN 34;RBM34
6600	PORTHOMCL6600[AjBfCiDrGgLvMmOjOlPsSpXl|(13 genes, 12 taxa)]:	-0.678407	-0.60422	-0.571813	-0.368064	-0.0407353	-0.110265	-0.470506	-0.655464	-0.707176	0.0658617	-0.191667	-0.395584	LSM4	LSM4	LSM4	LSM4.S	LSM4	LSM4	U6 SNRNA-ASSOCIATED SM-LIKE PROTEIN LSM4, TRANSCRIPT VARIANT X2; U6 SNRNA-ASSOCIATED SM-LIKE PROTEIN LSM4, TRANSCRIPT VARIANT X1;LSM4	LSM4	LSM4_HUMAN	PUTATIVE U6 SNRNA-ASSOCIATED SM-LIKE PROTEIN LSM4;LSM4	LSM4_MOUSE	U6 SNRNA-ASSOCIATED SM-LIKE PROTEIN LSM4;LSM4
3883	PORTHOMCL3883[AjBfCgCiDrGgLvMmOjOlPsSpXl|(16 genes, 13 taxa)]:	-0.31533	-0.239429	-0.117308	-0.86424	-0.150074	-0.683147	-0.855766	0.543846	0.718559	0.504231	-0.400368	-0.394921	VPS29	VPS29	VPS29	VPS29.S;LOC108716875;VPS29	VPS29	VPS29	VACUOLAR PROTEIN SORTING-ASSOCIATED PROTEIN 29-LIKE;VPS29	VPS29	VPS29_MOUSE;VPS29	PUTATIVE VACUOLAR PROTEIN SORTING-ASSOCIATED PROTEIN 29 ISOFORM X1;PUTATIVE VACUOLAR PROTEIN SORTING-ASSOCIATED PROTEIN 29 ISOFORM X2;VPS29	VPS29_RAT;VPS29	VACUOLAR PROTEIN SORTING-ASSOCIATED PROTEIN 29, TRANSCRIPT VARIANT X1; VACUOLAR PROTEIN SORTING-ASSOCIATED PROTEIN 29, TRANSCRIPT VARIANT X2;VPS29
6759	PORTHOMCL6759[AjCgCiDrGgLvMmOjOlPsSpXl|(13 genes, 12 taxa)]:	-0.481099	-0.202692	-0.547637	-0.378407	-0.435735	-0.323853	-0.580519	0	-0.919912	-0.394014	0.159559	-0.394904	CCDC58	CCDC58	CCDC58	CCDC58.S;CCDC58	CCDC58	CCDC58	COILED-COIL DOMAIN-CONTAINING PROTEIN 58-LIKE, TRANSCRIPT VARIANT X2; COILED-COIL DOMAIN-CONTAINING PROTEIN 58-LIKE, TRANSCRIPT VARIANT X1		CCD58_DANRE;CCDC58	PUTATIVE COILED-COIL DOMAIN-CONTAINING PROTEIN	CCD58_HUMAN	COILED-COIL DOMAIN-CONTAINING PROTEIN 58
5635	PORTHOMCL5635[AjBfCgCiDrGgLvMmOjOlPsSpXl|(14 genes, 13 taxa)]:	-0.211648	-0.865451	-0.640879	-0.155147	-0.143578	-0.351294	-0.148911	0.159231	-0.875647	-0.657007	-0.181495	-0.394666	INTS10	INTS10	INTS10	INTS10.L;INTS10	INTS10	INTS10	INTEGRATOR COMPLEX SUBUNIT 10-LIKE	INTS10	INT10_HUMAN	HYPOTHETICAL PROTEIN	INT10_CHICK	INTEGRATOR COMPLEX SUBUNIT 10
272	PORTHOMCL272[AjBfCgCiDrGgLvMmOjOlPsSpXl|(62 genes, 13 taxa)]:	-0.0184066	-0.367253	-0.552418	-0.693162	-0.0353922	-0.698235	0.717701	-0.46855	0.6975	0.673354	0.404412	-0.394144	ACTB;ACTL9	ACTG1;ACTB;ACTRT2	ACTB;ACTG1;ACTRT3;ACTL9;ACTRT1;GM17087;ACTL11;ACTRT2;ACTL7A	ACTB.L;LOC108703086;ACTG1.S	ACTIN, CYTOPLASMIC;ACTIN, CYTOPLASMIC 2;ACTB	ACTB1;ACTB2;ACTA1A;ACTA1	ACT PROTEIN, TRANSCRIPT VARIANT X1; ACT PROTEIN;ACTIN-3, TRANSCRIPT VARIANT X2		ACTC_PISOC;ACT2_CAEEL;ACTC_BIOOB	PUTATIVE ALPHA-CENTRACTIN;ACTR1A	ACT1_HELTB;ACTM_HELTB;ACTC_PISOC;ACT2_SCHMA;ACTA_STRPU;ACT_KLULA;ACT_CRAGI;ACTC_BIOOB	ACTIN, TRANSCRIPT VARIANT X1; ACTIN;MUSCLE ACTIN, TRANSCRIPT VARIANT X1; MUSCLE ACTIN;ACTIN, CYTOPLASMIC;ACTIN, CYTOSKELETAL 3-LIKE;ACTIN-15B;ACTIN-85C, TRANSCRIPT VARIANT X5; ACTIN-85C, TRANSCRIPT VARIANT X6; ACTIN-85C, TRANSCRIPT VARIANT X8; ACTIN-85C, TRANSCRIPT VARIANT X7; ACTIN-85C, TRANSCRIPT VARIANT X4; ACTIN-85C, TRANSCRIPT VARIANT X3; ACTIN-85C, TRANSCRIPT VARIANT X1;ACTIN, CLONE 302, TR…
5256	PORTHOMCL5256[AjBfCiDrGgLvMmOjOlPsSpXl|(14 genes, 12 taxa)]:	-0.343901	-0.798286	-0.508407	-0.266078	-0.34125	-0.103735	-0.152156	-0.346853	0.217529	-0.564665	-0.733333	-0.39361	MRPS30	MRPS30	MRPS30	MRPS30.L;MRPS30.S;MRPS30	MRPS30	MRPS30	28S RIBOSOMAL PROTEIN S30, MITOCHONDRIAL-LIKE		RT30_BOVIN	PUTATIVE 28S RIBOSOMAL PROTEIN S30, MITOCHONDRIAL	RT30_BOVIN	28S RIBOSOMAL PROTEIN S30, MITOCHONDRIAL
7537	PORTHOMCL7537[AjCiDrGgMmOlPsXl|(12 genes, 8 taxa)]:	-0.272363	-0.501143	-0.557253	-0.120515	-0.525637	-0.382037	-0.510029	0	0	0	0	-0.393158	HMGXB3	HMGXB3	HMGXB3	HMGXB3.L;HMGXB3		SI:CH211-238E22.2;SI:DKEYP-117B11.2	UNCHARACTERIZED LOC104266586, TRANSCRIPT VARIANT X1;HMG DOMAIN-CONTAINING PROTEIN 3-LIKE			HYPOTHETICAL PROTEIN
3171	PORTHOMCL3171[AjCgCiDrGgLvMmOjOlPsSpXl|(17 genes, 12 taxa)]:	-0.268681	-0.464396	-0.599945	-0.395417	-0.107892	-0.521471	0.233195	0	-0.442147	-0.899422	-0.0427696	-0.392967	REV3L	REV3L	REV3L	REV3L.L;REV3L	POLD1;REV3L	POLD1;REV3L	DNA POLYMERASE ZETA CATALYTIC SUBUNIT		DPOLZ_MOUSE	PUTATIVE DNA POLYMERASE ZETA CATALYTIC SUBUNIT;PUTATIVE DNA POLYMERASE DELTA CATALYTIC SUBUNIT;DPD1	DPOLZ_MOUSE	DNA POLYMERASE ZETA CATALYTIC SUBUNIT
8502	PORTHOMCL8502[AjBfCgDrGgMmOlPsXl|(10 genes, 9 taxa)]:	-0.486703	-0.580747	-0.186978	-0.484779	-0.433897	-0.184676	0	0.0221218	0	0	0	-0.392964	TEN1	TEN1	TEN1	TEN1.L;TEN1	TEN1	TEN1				PUTATIVE CST COMPLEX SUBUNIT TEN1;HYPOTHETICAL PROTEIN
6860	PORTHOMCL6860[AjBfCgCiDrGgMmOjOlPsSpXl|(13 genes, 12 taxa)]:	-0.371264	-0.681407	-0.596758	-0.185196	-0.362794	-0.160294	-0.829078	-0.702785	0.218971	0	-0.448039	-0.392952	SUGP1	SUGP1	SUGP1	LOC494697;SUGP1.S;SUGP1	SUGP1	SUGP1	SURP AND G-PATCH DOMAIN-CONTAINING PROTEIN 1-LIKE;SUGP1		SUGP1_HUMAN	PUTATIVE SURP AND G-PATCH DOMAIN-CONTAINING PROTEIN 1-LIKE		UNCHARACTERIZED LOC583039
6862	PORTHOMCL6862[AjBfCiDrGgLvMmOjOlPsSpXl|(13 genes, 12 taxa)]:	-0.453022	-0.737934	-0.518626	-0.0757843	-0.313554	-0.253794	-0.772701	0.0698601	-0.656147	-0.662436	-0.811765	-0.392119	MTPAP	MTPAP	MTPAP	LOC108718472;MTPAP	MTPAP	MTPAP	POLY(A) RNA POLYMERASE, MITOCHONDRIAL			PUTATIVE POLY(A) RNA POLYMERASE, MITOCHONDRIAL	PAPD1_HUMAN;MTPAP	POLY(A) RNA POLYMERASE, MITOCHONDRIAL;MTPAP
10865	PORTHOMCL10865[BfDrGgMmOlPsXl|(7 genes, 7 taxa)]:	-0.248681	-0.518198	-0.537363	-0.297696	-0.526961	-0.221029	0	0.753916	0	0	0	-0.391655	CCDC86	CCDC86	CCDC86	MGC115313	COILED-COIL DOMAIN CONTAINING 86;CCDC86	SI:CH211-217K17.7;CCDC86
3059	PORTHOMCL3059[AjBfCgCiDrGgLvMmOjOlPsSpXl|(18 genes, 13 taxa)]:	-0.225824	-0.186418	-0.477253	-0.0540196	-0.60848	-0.797676	-0.761403	-0.853487	-0.846912	-0.783364	-0.33223	-0.391612	RNF10	RNF10	RNF10	RNF10.S;LOC108716017;RNF10	RNF10	RNF10	RING FINGER PROTEIN 10, TRANSCRIPT VARIANT X1; RING FINGER PROTEIN 10, TRANSCRIPT VARIANT X2		RNF10_XENLA	PUTATIVE RING FINGER PROTEIN 10-LIKE;HYPOTHETICAL PROTEIN	RNF10_XENLA	RING FINGER PROTEIN 10
9587	PORTHOMCL9587[BfCgDrGgMmOlPsSpXl|(9 genes, 9 taxa)]:	-0.335659	-0.574945	-0.535714	-0.0527451	-0.522304	-0.318471	0	0.439091	0	0	-0.478503	-0.389973	ZNF511	ZNF511	ZFP511;ZNF511	LOC108696300;ZNF511	ZNF511	ZNF511		ZNF511				ZINC FINGER PROTEIN 511, TRANSCRIPT VARIANT X2; ZINC FINGER PROTEIN 511, TRANSCRIPT VARIANT X1
4603	PORTHOMCL4603[AjBfCgCiDrGgLvMmOjOlPsSpXl|(15 genes, 13 taxa)]:	-0.425989	-0.566769	-0.545989	-0.308431	-0.082451	-0.407235	-0.544156	-0.56324	-0.511647	-0.56194	-0.728431	-0.389477	PMPCA	PMPCA	PMPCA	PMPCA.L;PMPCA.S;PMPCA	PMPCA	PMPCA	MITOCHONDRIAL-PROCESSING PEPTIDASE SUBUNIT ALPHA-LIKE;PMPCA	PMPCA	MPPA_HUMAN;PMPCA	PUTATIVE MITOCHONDRIAL-PROCESSING PEPTIDASE SUBUNIT ALPHA ISOFORM X1;PMPCA	MPPA_HUMAN;MPPA_MOUSE;PMPCA	MITOCHONDRIAL-PROCESSING PEPTIDASE SUBUNIT ALPHA, TRANSCRIPT VARIANT X2; MITOCHONDRIAL-PROCESSING PEPTIDASE SUBUNIT ALPHA, TRANSCRIPT VARIANT X1;PMPCA
5638	PORTHOMCL5638[AjCgCiDrGgLvMmOjOlPsSpXl|(14 genes, 12 taxa)]:	-0.464011	-0.547912	-0.538352	-0.334314	-0.118799	-0.328029	-0.823247	0	-0.931118	-0.540702	-0.61201	-0.388569		NOP2	NOP2	NOP2.L;NOP2	NOP2 NUCLEOLAR PROTEIN;NOP2	NOP2	PROBABLE 28S RRNA (CYTOSINE-C(5))-METHYLTRANSFERASE;NOP2		NOP2_HUMAN	HYPOTHETICAL PROTEIN;NOP2	NOP2_MOUSE;NOP2	25S RRNA (CYTOSINE-C(5))-METHYLTRANSFERASE NOP2;PROBABLE 28S RRNA (CYTOSINE-C(5))-METHYLTRANSFERASE;NOP2;CG8545
4117	PORTHOMCL4117[AjBfCgCiDrGgLvMmOjOlPsSpXl|(16 genes, 13 taxa)]:	-0.561209	-0.74211	-0.576154	-0.13652	-0.203137	-0.112206	-0.739351	-0.878454	-0.280029	-0.286667	-0.58799	-0.388556	CLNS1A	CLNS1A	CLNS1A	LOC108696418;CLNS1A	CLNS1A	CLNS1A	METHYLOSOME SUBUNIT PICLN-LIKE	CLNS1A	ICLN_RABIT	PUTATIVE METHYLOSOME SUBUNIT PICLN-LIKE ISOFORM X1;CLNS1A	ICLN_MOUSE	METHYLOSOME SUBUNIT PICLN-LIKE;METHYLOSOME SUBUNIT PICLN;CLNS1A
9790	PORTHOMCL9790[DrGgLvMmOjOlPsSpXl|(9 genes, 9 taxa)]:	-0.271978	-0.640044	-0.845824	-0.143137	-0.30973	-0.120294	0	0	-0.863	-0.870918	-0.300613	-0.388501	NCOA5	NCOA5	NCOA5	NCOA5.L;NCOA5	NCOA5	NCOA5			NCOA5_HUMAN		NCOA5_HUMAN	NUCLEAR RECEPTOR COACTIVATOR 5, TRANSCRIPT VARIANT X1; NUCLEAR RECEPTOR COACTIVATOR 5, TRANSCRIPT VARIANT X2
954	PORTHOMCL954[AjBfCgCiDrGgLvMmOjOlPsSpXl|(30 genes, 13 taxa)]:	-0.0451099	-0.614198	-0.966264	-0.225858	-0.0298529	-0.449471	-0.914169	-0.751113	-0.800765	-0.744768	-0.00171569	-0.388459	PBX3;PBX1;PBX4	PBX3;PBX4	PBX3;PBX1;PBX2;PBX4	PBX3.S;PBX1.S;LOC108698242;PBX3	PBX1A;PBX HOMEOBOX 3;PBX HOMEOBOX 1;PBX1	PBX1B;PBX1A;PBX3B;PBX2;PBX4;PBX3A;PBX1;PBX3	TRANSCRIPTION FACTOR PROTEIN;PBX2		PBX1_MOUSE	PUTATIVE PBX HOMEOBOX PROTEIN ISOFORM X1	PBX3_MOUSE;PBX2_XENLA	PRE-B-CELL LEUKEMIA TRANSCRIPTION FACTOR 3
4614	PORTHOMCL4614[AjBfCgCiDrGgLvMmOjOlPsSpXl|(15 genes, 13 taxa)]:	-0.401154	-0.788879	-0.544011	-0.0804902	-0.380441	-0.135647	-0.691091	0.381958	-0.896882	-0.590691	-0.690686	-0.388437	KRR1	KRR1	KRR1	KRR1.S;KRR1	KRR1	KRR1	KRR1 SMALL SUBUNIT PROCESSOME COMPONENT HOMOLOG, TRANSCRIPT VARIANT X1; KRR1 SMALL SUBUNIT PROCESSOME COMPONENT HOMOLOG, TRANSCRIPT VARIANT X2;KRR1	KRR1	KRR1_MOUSE	PUTATIVE KRR1 SMALL SUBUNIT PROCESSOME COMPONENT-LIKE;KRR1	KRR1_MOUSE;KRR1_DROGR;KRR1	KRR1 SMALL SUBUNIT PROCESSOME COMPONENT HOMOLOG;KRR1
2974	PORTHOMCL2974[AjBfCgCiDrGgLvMmOjOlPsSpXl|(18 genes, 13 taxa)]:	-0.190824	-0.768396	-0.794011	-0.313578	-0.208873	-0.0542647	-0.747909	0.543846	-0.867	-0.72849	-0.642605	-0.388324	CEP128	CEP128	CEP128	CEP128.L;CEP128	CEP128	CEP128	CENTROSOMAL PROTEIN OF 128 KDA-LIKE		CE128_HUMAN	PUTATIVE CENTROSOMAL PROTEIN;HYPOTHETICAL PROTEIN	CE128_HUMAN	SPINDLE POLE BODY COMPONENT 110;CENTROSOMAL PROTEIN OF 128 KDA
8799	PORTHOMCL8799[AjBfDrGgLvMmOlPsSpXl|(10 genes, 10 taxa)]:	-0.42544	-0.57411	-0.168187	-0.652623	-0.164387	-0.342588	0	-0.309301	0	-0.194023	0.246929	-0.387889	COX16	COX16	COX16	COX16.L;COX16	COX16	COX16				PUTATIVE CYTOCHROME C OXIDASE ASSEMBLY PROTEIN COX16-LIKE, MITOCHONDRIAL;COX16	COX16_MOUSE	CYTOCHROME C OXIDASE ASSEMBLY PROTEIN COX16 HOMOLOG, MITOCHONDRIAL;COX16
6284	PORTHOMCL6284[AjBfCgCiDrGgLvMmOjOlPsSpXl|(13 genes, 13 taxa)]:	-0.0565385	-0.830066	-0.900385	-0.162598	-0.202181	-0.174912	-0.852169	0.594196	-0.855206	-0.79453	-0.334559	-0.38778	PPP2R3C	PPP2R3C	PPP2R3C	PPP2R3C.L;PPP2R3C	PPP2R3C	PPP2R3C	SERINE/THREONINE-PROTEIN PHOSPHATASE 2A REGULATORY SUBUNIT B'' SUBUNIT GAMMA;PPP2R3C	PPP2R3C	P2R3C_BOVIN;PPP2R3C	PUTATIVE SERINE/THREONINE-PROTEIN PHOSPHATASE 2A REGULATORY SUBUNIT B'' SUBUNIT GAMMA	P2R3C_BOVIN	SERINE/THREONINE-PROTEIN PHOSPHATASE 2A REGULATORY SUBUNIT B'' SUBUNIT GAMMA;PPP2R3C
742	PORTHOMCL742[AjBfCgCiDrGgMmOjOlPsSpXl|(34 genes, 12 taxa)]:	-0.518132	-0.0414945	-0.242469	-0.817192	-0.199004	-0.506681	0.658974	-0.230985	0.614731	0	-0.0651961	-0.387495	METTL24	METTL24	METTL24	METTL24.L;METTL24	METTL24	METTL24	METHYLTRANSFERASE-LIKE PROTEIN 24;METHYLTRANSFERASE-LIKE PROTEIN 24, TRANSCRIPT VARIANT X1; METHYLTRANSFERASE-LIKE PROTEIN 24, TRANSCRIPT VARIANT X3; METHYLTRANSFERASE-LIKE PROTEIN 24, TRANSCRIPT VARIANT X2; METHYLTRANSFERASE-LIKE PROTEIN 24, TRANSCRIPT VARIANT X4;METHYLTRANSFERASE-LIKE PROTEIN 24, TRANSCRIPT VARIANT X1; METHYLTRANSFERASE-LIKE PROTEIN 24, TRANSCRIPT VARIANT X2		MET24_XENTR	PUTATIVE METHYLTRANSFERASE-LIKE PROTEIN 24-LIKE;METTL24		METHYLTRANSFERASE-LIKE PROTEIN 24;METTL24
4972	PORTHOMCL4972[AjBfCgCiDrGgLvMmOjOlPsSpXl|(15 genes, 13 taxa)]:	-0.417418	-0.614242	-0.601758	-0.311348	-0.251912	-0.124618	-0.275558	-0.61127	-0.836647	-0.535996	-0.765196	-0.386883	NOC2L	NOC2L	NOC2L	NOC2L.S;NOC2L.L;NOC2L	NOC2L	NOC2L	NUCLEOLAR COMPLEX PROTEIN 2 HOMOLOG, TRANSCRIPT VARIANT X1; NUCLEOLAR COMPLEX PROTEIN 2 HOMOLOG, TRANSCRIPT VARIANT X2;NOC2L	NOC2L	NOC2L_MOUSE;NOC2L	PUTATIVE NUCLEOLAR COMPLEX PROTEIN 2-LIKE	NOC2L_BOVIN;NOC2L	NUCLEOLAR COMPLEX PROTEIN 2 HOMOLOG;NOC2L
2323	PORTHOMCL2323[AjBfCgCiDrGgLvMmOjOlPsSpXl|(20 genes, 13 taxa)]:	-0.522802	-0.529582	-0.540495	-0.278333	-0.174191	-0.259941	0.582065	0.426154	-0.560618	-0.65934	-0.231618	-0.384224	MAP2K6;MAP2K3	MAP2K6;MAP2K3	MAP2K6;MAP2K3	MAP2K3;MAP2K6.L;MAP2K6	MAP2K6	MAP2K6	MITOGEN-ACTIVATED PROTEIN KINASE KINASE		MP2K6_MOUSE	HYPOTHETICAL PROTEIN;PUTATIVE DUAL SPECIFICITY MITOGEN-ACTIVATED PROTEIN KINASE KINASE 3 ISOFORM X1	MP2K6_BOVIN	DUAL SPECIFICITY MITOGEN-ACTIVATED PROTEIN KINASE KINASE 6
9956	PORTHOMCL9956[BfDrGgMmOlPsSpXl|(8 genes, 8 taxa)]:	-0.0135714	-0.626857	-0.932143	-0.46527	-0.125098	-0.140412	0	-0.321724	0	0	0	-0.383892	RAI14	RAI14	RAI14	RAI14.S;RAI14	RAI14	RAI14						ANKYRIN-3-LIKE
2533	PORTHOMCL2533[AjBfCgCiDrGgMmOjOlPsXl|(19 genes, 11 taxa)]:	-0.10044	-0.524176	-0.604505	-0.129853	-0.551569	-0.386471	-0.614896	-0.533846	-0.803706	0	0	-0.382836	RNF220	RNF220	RNF220	RNF220.1.L;LOC108715569;RNF220	RNF220B;RNF220;RNF220A	RNF220A;RNF220B;RNF220	E3 UBIQUITIN-PROTEIN LIGASE RNF220-LIKE, TRANSCRIPT VARIANT X3; E3 UBIQUITIN-PROTEIN LIGASE RNF220-LIKE, TRANSCRIPT VARIANT X1; E3 UBIQUITIN-PROTEIN LIGASE RNF220-LIKE, TRANSCRIPT VARIANT X2;LOC101242523	RNF220	RN220_HUMAN	HYPOTHETICAL PROTEIN;RNF220
4766	PORTHOMCL4766[AjBfCgCiDrGgLvMmOjOlPsSpXl|(15 genes, 13 taxa)]:	-0.115275	-0.498593	-0.513132	-0.233333	-0.838554	-0.0966471	-0.926766	-0.287533	0.560941	-0.559587	-0.345711	-0.382589		TAF6L	TAF6L	TAF6L.S;TAF6L	TAF6L	TAF6L	TAF6-LIKE RNA POLYMERASE II P300/CBP-ASSOCIATED FACTOR-ASSOCIATED FACTOR 65 KDA SUBUNIT 6L	TAF6L	TAF6L_HUMAN	PUTATIVE TAF6-LIKE RNA POLYMERASE II;TAF6L	TAF6L_MOUSE	TAF6-LIKE RNA POLYMERASE II P300/CBP-ASSOCIATED FACTOR-ASSOCIATED FACTOR 65 KDA SUBUNIT 6L;TAF6L
4861	PORTHOMCL4861[AjBfCgCiDrGgLvMmOjOlPsSpXl|(15 genes, 13 taxa)]:	-0.806264	-0.383648	-0.48044	-0.307083	-0.199167	-0.110382	-0.799026	-0.816321	-0.837029	-0.702394	-0.402819	-0.381164	NUDT1	NUDT1	NUDT1	NUDT1.S;NUDT1	NUDT1	NUDT1	7,8-DIHYDRO-8-OXOGUANINE TRIPHOSPHATASE-LIKE;NUDT1	NUDT1	8ODP_RAT;NUDT1	PUTATIVE 7,8-DIHYDRO-8-OXOGUANINE TRIPHOSPHATASE;NUDT1	8ODP_RAT;NUDT1	7,8-DIHYDRO-8-OXOGUANINE TRIPHOSPHATASE;NUDT1
4586	PORTHOMCL4586[AjCgCiDrGgLvMmOjOlPsSpXl|(15 genes, 12 taxa)]:	-0.45522	-0.404484	-0.524725	-0.209804	-0.538284	-0.153628	-0.80313	0	-0.667353	0.144004	-0.625123	-0.381024	DDX49	DDX49	DDX49	DDX49.S;DDX49.L;DDX49	DDX49	DDX49	PROBABLE ATP-DEPENDENT RNA HELICASE DDX49;DDX49		DDX49_HUMAN;DDX49	PUTATIVE ATP-DEPENDENT RNA HELICASE DDX49;DDX49	DDX49_HUMAN	PROBABLE ATP-DEPENDENT RNA HELICASE DDX49;DDX49
6627	PORTHOMCL6627[AjBfCgCiDrGgLvMmOjOlPsSpXl|(13 genes, 13 taxa)]:	-0.453462	-0.818198	-0.590495	-0.0978676	-0.132647	-0.192471	0.412961	0.639091	0.233059	-0.222704	-0.72402	-0.380857	ARMT1	C6ORF211;ARMT1	ARMT1	ARMT1.L;ARMT1	ARMT1	ARMT1	PROTEIN-GLUTAMATE O-METHYLTRANSFERASE-LIKE, TRANSCRIPT VARIANT X2; PROTEIN-GLUTAMATE O-METHYLTRANSFERASE-LIKE, TRANSCRIPT VARIANT X1;ARMT1	ARMT1	ARMT1_DANRE	HYPOTHETICAL PROTEIN;ARMT1	ARMT1_XENTR;ARMT1	UPF0364 PROTEIN C6ORF211 HOMOLOG, TRANSCRIPT VARIANT X1;ARMT1
4843	PORTHOMCL4843[AjBfCgCiDrGgLvMmOjOlPsSpXl|(15 genes, 13 taxa)]:	-0.593791	-0.77578	-0.489945	-0.129069	-0.0992892	-0.196618	-0.841948	0.542867	-0.773176	-0.626419	-0.700613	-0.380749	RPF2	RPF2	RPF2	RPF2.S;RPF2	RPF2	RPF2	RIBOSOME PRODUCTION FACTOR 2 HOMOLOG, TRANSCRIPT VARIANT X1; RIBOSOME PRODUCTION FACTOR 2 HOMOLOG, TRANSCRIPT VARIANT X2;RPF2	RPF2	RPF2_MOUSE	PUTATIVE RIBOSOME PRODUCTION FACTOR 2-LIKE;RPF2	RPF2_MOUSE;RPF2	RIBOSOME PRODUCTION FACTOR 2 HOMOLOG;RPF2
1732	PORTHOMCL1732[AjBfCgCiDrGgMmOjOlPsSpXl|(23 genes, 12 taxa)]:	-0.164945	-0.474813	-0.0263358	-0.68058	-0.0382037	-0.899162	0.158312	-0.65867	-0.314353	0	-0.221078	-0.380673	DCDC2;DCDC2B	DCDC2C;DCDC2B;DCDC2	DCDC2A;DCDC2B;DCDC2C;DCDC2	DCDC2.L;DCDC2B.L;DCDC2.S;DCDC2;DCDC2B	DOUBLECORTIN DOMAIN-CONTAINING PROTEIN 2;DCDC2B;DCDC2	DCDC2C;DCDC2B;DCDC2	PROBABLE SERINE/THREONINE-PROTEIN KINASE KINX, TRANSCRIPT VARIANT X4; PROBABLE SERINE/THREONINE-PROTEIN KINASE KINX, TRANSCRIPT VARIANT X5; PROBABLE SERINE/THREONINE-PROTEIN KINASE KINX, TRANSCRIPT VARIANT X3; PROBABLE SERINE/THREONINE-PROTEIN KINASE KINX, TRANSCRIPT VARIANT X2; PROBABLE SERINE/THREONINE-PROTEIN KINASE KINX, TRANSCRIPT VARIANT X1;LOC100181386		DCDC2_RAT	HYPOTHETICAL PROTEIN		DOUBLECORTIN DOMAIN-CONTAINING PROTEIN 2, TRANSCRIPT VARIANT X2; DOUBLECORTIN DOMAIN-CONTAINING PROTEIN 2, TRANSCRIPT VARIANT X1; DOUBLECORTIN DOMAIN-CONTAINING PROTEIN 2, TRANSCRIPT VARIANT X3; DOUBLECORTIN DOMAIN-CONTAINING PROTEIN 2, TRANSCRIPT VARIANT X5; DOUBLECORTIN DOMAIN-CONTAINING PROTEIN 2, TRANSCRIPT VARIANT X6
7720	PORTHOMCL7720[BfCiDrGgMmOjOlPsSpXl|(12 genes, 10 taxa)]:	-0.363626	-0.697495	-0.0897253	-0.311887	-0.417059	-0.398	-0.725442	-0.68641	-0.676108	0	0.180463	-0.379632	TMEM267	C5ORF28;TMEM267	GM21967;TMEM267	C5ORF28.L;C5ORF28.S;TMEM267	TMEM267	TMEM267	TRANSMEMBRANE PROTEIN C5ORF28-LIKE		CE028_MOUSE			TRANSMEMBRANE PROTEIN C5ORF28
12189	PORTHOMCL12189[DrGgMmOlPsXl|(6 genes, 6 taxa)]:	-0.197088	-0.72822	-0.216099	-0.316103	-0.358471	-0.458027	0	0	0	0	0	-0.379001	TWF2	WDR82	TWF2	TWF2.L;TWF2	TWINFILIN-2	TWF2B
9617	PORTHOMCL9617[BfCiDrGgMmOlPsXl|(9 genes, 8 taxa)]:	-0.0736813	-0.798374	-0.610769	-0.338186	-0.216495	-0.227405	-0.864987	0.173427	0	0	0	-0.377485	FAM199X	FAM199X	FAM199X	FAM199X.L;FAM199X.S	FAM199X	FAM199X	SERINE-RICH ADHESIN FOR PLATELETS
2775	PORTHOMCL2775[AjBfCgCiDrGgLvMmOjOlPsSpXl|(18 genes, 13 taxa)]:	-0.518022	-0.600527	-0.560055	-0.194902	-0.363676	-0.0262059	-0.677506	-0.334196	-0.811235	-0.49257	-0.843873	-0.377231	EXOSC2	EXOSC2	EXOSC2	EXOSC2.L;EXOSC2	EXOSC2	EXOSC2	EXOSOME COMPLEX COMPONENT RRP4;EXOSC2	EXOSC2	EXOS2_BOVIN;EXOSC2	PUTATIVE EXOSOME COMPLEX COMPONENT RRP4;PUTATIVE EXOSOME COMPLEX COMPONENT RRP4-LIKE;EXOSC2	EXOS2_BOVIN;EXOSC2	EXOSOME COMPLEX COMPONENT RRP4;EXOSC2
1267	PORTHOMCL1267[AjBfCiDrGgLvMmOjOlPsSpXl|(26 genes, 12 taxa)]:	-0.0617582	-0.387912	-0.902088	-0.28201	-0.171044	-0.452765	-0.259896	-0.674545	0.371559	0.203963	0.455882	-0.376263	SYNE2;SYNE1	SYNE2	SYNE2	LOC108698815	SYNE2B	SYNE1A;SYNE2B;SI:DKEYP-77C8.2;SI:CH211-207I1.2;SYNE1	NESPRIN-1, TRANSCRIPT VARIANT X1; NESPRIN-1, TRANSCRIPT VARIANT X2		SYNE1_HUMAN	PUTATIVE NESPRIN-1 ISOFORM X3;PUTATIVE NESPRIN-1-LIKE;PUTATIVE NESPRIN-1 ISOFORM X1;SYNE2B	SYNE1_HUMAN;SYNE1_MOUSE	NESPRIN-1, TRANSCRIPT VARIANT X2; NESPRIN-1, TRANSCRIPT VARIANT X3; NESPRIN-1, TRANSCRIPT VARIANT X1
5610	PORTHOMCL5610[AjBfCgCiDrGgLvMmOjOlPsSpXl|(14 genes, 13 taxa)]:	-0.521813	-0.628484	-0.534835	-0.213186	-0.231936	-0.118824	-0.758117	-0.906583	-0.750971	-0.835273	-0.705515	-0.374846	EBNA1BP2	EBNA1BP2	EBNA1BP2	EBNA1BP2-A;EBNA1BP2	EBNA1BP2	EBNA1BP2	PROBABLE RRNA-PROCESSING PROTEIN EBP2;LOC100183007	EBNA1BP2	EBP2_MOUSE	PUTATIVE RRNA-PROCESSING PROTEIN EBP2;EBNA1BP2	EBP2_MOUSE;EBNA1BP2	PROBABLE RRNA-PROCESSING PROTEIN EBP2;EBNA1BP2
3176	PORTHOMCL3176[AjBfCgCiDrGgLvMmOjOlPsSpXl|(17 genes, 13 taxa)]:	-0.0315934	-0.370769	-0.297637	-0.856959	-0.115123	-0.575184	-0.645169	-0.307273	0.404294	-0.110609	0.513736	-0.374544	TUBB		TUBB2B	TUBB2B.L;LOC108706200	TUBB2	TUBB2;TUBB2B	TUBULIN BETA CHAIN;TUBB4A		TBB4B_RAT;TBB_STRPU	PUTATIVE TUBULIN BETA CHAIN-LIKE;TUBB4A	TBB_STRPU	TUBULIN BETA CHAIN-LIKE
4113	PORTHOMCL4113[AjBfCgCiDrGgLvMmOjOlPsSpXl|(16 genes, 13 taxa)]:	-0.452912	-0.532703	-0.487637	-0.341397	-0.100931	-0.331382	-0.801208	-0.302797	-0.658882	-0.793829	-0.718382	-0.374494	GET4	GET4	GET4	GET4.S;GET4	GET4	GET4	GOLGI TO ER TRAFFIC PROTEIN 4 HOMOLOG	GET4	GET4_ORYLA;GET4	GOLGI TO ER TRAFFIC PROTEIN 4-LIKE;PUTATIVE GOLGI TO ER TRAFFIC PROTEIN 4-LIKE B;GET4	GET4_HUMAN;GET4	GOLGI TO ER TRAFFIC PROTEIN 4 HOMOLOG B, TRANSCRIPT VARIANT X3; GOLGI TO ER TRAFFIC PROTEIN 4 HOMOLOG B, TRANSCRIPT VARIANT X2; GOLGI TO ER TRAFFIC PROTEIN 4 HOMOLOG B, TRANSCRIPT VARIANT X1;GET4
5217	PORTHOMCL5217[AjBfCiDrGgLvMmOjOlPsSpXl|(14 genes, 12 taxa)]:	-0.178516	-0.620879	-0.396209	-0.300613	-0.340931	-0.408941	-0.621338	-0.650861	-0.508029	-0.459254	-0.516667	-0.374348	POLR3H	POLR3H	POLR3H	POLR3H.L;POLR3H	POLR3H	POLR3H	DNA-DIRECTED RNA POLYMERASE III SUBUNIT RPC8-LIKE;POLR3H	POLR3H	RPC8_HUMAN;POLR3H	PUTATIVE DNA-DIRECTED RNA POLYMERASE III SUBUNIT RPC8;POLR3H	RPC8_HUMAN;POLR3H	DNA-DIRECTED RNA POLYMERASE III SUBUNIT RPC8;DNA-DIRECTED RNA POLYMERASE III SUBUNIT RPC8-LIKE, TRANSCRIPT VARIANT X1; DNA-DIRECTED RNA POLYMERASE III SUBUNIT RPC8-LIKE, TRANSCRIPT VARIANT X2;POLR3H
1391	PORTHOMCL1391[AjBfCgCiDrGgLvMmOjOlPsSpXl|(25 genes, 13 taxa)]:	-0.458571	-0.536132	-0.376648	-0.441005	-0.32451	-0.107647	-0.629247	-0.47965	0.901412	-0.303137	-0.598529	-0.374086	EXOG;ENDOG	EXOG;ENDOG	EXOG;ENDOG	ENDOG.L;EXOG.L;ENDOG	ENDOG	ENDOG;FQ311879.2;SI:CH211-274J7.1;FO818714.1	ENDONUCLEASE G, MITOCHONDRIAL-LIKE;ENDOG	ENDOG	EXOG_XENLA;EXOG	PUTATIVE NUCLEASE EXOG, MITOCHONDRIAL;HYPOTHETICAL PROTEIN;EXOG	EXOG_DANRE;EXOG	NUCLEASE EXOG, MITOCHONDRIAL;EXOG
2373	PORTHOMCL2373[AjBfCiDrGgLvMmOjOlPsSpXl|(20 genes, 12 taxa)]:	-0.735879	-0.61222	-0.517637	-0.127545	-0.131538	-0.118433	0.293857	-0.587063	0.751002	-0.429147	-0.154289	-0.373875	GPC5;GPC3	GPC5;GPC3	GPC5;GPC3	GPC5.S;GPC3.L;LOC108700176;GPC5;GPC3	GPC5A;GPC3	GPC5A;GPC3;CABZ01079543.1;GPC5	GLYPICAN-5, TRANSCRIPT VARIANT X3; GLYPICAN-5, TRANSCRIPT VARIANT X1; GLYPICAN-5, TRANSCRIPT VARIANT X2		GPC5_MOUSE	GLYPICAN 5	GPC1_CHICK	GLYPICAN-5
2216	PORTHOMCL2216[AjBfDrGgLvMmOlPsSpXl|(20 genes, 10 taxa)]:	-0.658571	-0.54356	-0.708462	-0.0765322	-0.0458951	-0.207404	0	-0.537491	0	0.680194	-0.18125	-0.373404	SQLE	SQLE	SQLE	LOC108719421;SQLE.S;SQLE	SQLEA;SQLE	SQLEA;SI:CH73-216M24.3;SQLE		SQLE		PUTATIVE SQUALENE MONOOXYGENASE ISOFORM X1	ERG1_HUMAN;SQLE	SQUALENE MONOOXYGENASE-LIKE;SQUALENE MONOOXYGENASE;SQLE
5288	PORTHOMCL5288[AjBfCgCiDrGgLvMmOjOlPsSpXl|(14 genes, 13 taxa)]:	-0.0652198	-0.55789	-0.0435165	-0.171789	-0.566495	-0.831765	-0.862286	-0.784587	-0.908059	-0.77259	-0.636887	-0.372779	SLC30A5	SLC30A5	SLC30A5	SLC30A5.L;LOC108707280;SLC30A5	SLC30A5	SLC30A5	ZINC TRANSPORTER 5-LIKE;SLC30A5	SLC30A5	ZNT5_MOUSE;SLC30A5	PUTATIVE ZINC TRANSPORTER 5;SLC30A5	ZNT5_DANRE;SLC30A5	ZINC TRANSPORTER 5;SLC30A5
8328	PORTHOMCL8328[BfCgCiDrGgLvMmOlPsSpXl|(11 genes, 11 taxa)]:	-0.328407	-0.327868	-0.816758	-0.115809	-0.13027	-0.511912	-0.911896	-0.184189	0	-0.0826625	0.0643382	-0.371837	APTX	APTX	APTX	APTX.L;APTX	APTX	APTX	FHA-HIT;APTX	APTX			APTX_MOUSE	APRATAXIN, TRANSCRIPT VARIANT X1; APRATAXIN, TRANSCRIPT VARIANT X2;APTX
6670	PORTHOMCL6670[AjBfCgCiDrGgLvMmOlPsSpXl|(13 genes, 12 taxa)]:	-0.035	-0.783604	-0.554176	-0.446422	-0.168162	-0.233824	-0.691805	0.0962449	0	-0.0691847	-0.29869	-0.370198	ALKBH1	ALKBH1	ALKBH1	ALKBH1.L;ALKBH1	ALKBH1	ALKBH1	DNA DEMETHYLASE ALKBH1	ALKBH1		PUTATIVE ALKYLATED DNA REPAIR PROTEIN ALKB-LIKE 1-LIKE	ALKB1_MOUSE	ALKYLATED DNA REPAIR PROTEIN ALKB HOMOLOG 1
9937	PORTHOMCL9937[AjBfDrGgMmOlPsXl|(8 genes, 8 taxa)]:	-0.20522	-0.690989	-0.383077	-0.142623	-0.720784	-0.0754412	0	0.282657	0	0	0	-0.369689	DPM2	DPM2	DPM2	DPM2.S	DPM2	DPM2				PUTATIVE DOLICHOL PHOSPHATE-MANNOSE BIOSYNTHESIS REGULATORY PROTEIN;DPM2
5016	PORTHOMCL5016[AjBfCgCiDrGgLvMmOjOlPsSpXl|(15 genes, 13 taxa)]:	-0.381209	-0.123956	-0.528681	-0.133603	-0.581667	-0.460971	-0.859883	-0.167762	-0.564059	-0.762477	-0.346201	-0.368348	POLR1E	POLR1E	POLR1E	POLR1E.L;POLR1E	POLR1E	POLR1E	DNA-DIRECTED RNA POLYMERASE I SUBUNIT RPA49-LIKE		RPA49_XENLA	PUTATIVE DNA-DIRECTED RNA POLYMERASE I SUBUNIT RPA49-LIKE;HYPOTHETICAL PROTEIN	RPA49_MOUSE	DNA-DIRECTED RNA POLYMERASE I SUBUNIT RPA49, TRANSCRIPT VARIANT X3; DNA-DIRECTED RNA POLYMERASE I SUBUNIT RPA49, TRANSCRIPT VARIANT X2; DNA-DIRECTED RNA POLYMERASE I SUBUNIT RPA49, TRANSCRIPT VARIANT X4; DNA-DIRECTED RNA POLYMERASE I SUBUNIT RPA49, TRANSCRIPT VARIANT X1
8565	PORTHOMCL8565[AjBfCgDrGgMmOjOlPsXl|(10 genes, 10 taxa)]:	-0.47978	-0.870857	-0.54989	-0.123529	-0.0263725	-0.156029	0	-0.56951	-0.469441	0	0	-0.367743	RPP40	RPP40	RPP40	RPP40.L;RPP40	RIBONUCLEASE P/MRP SUBUNIT P40;RPP40	RPP40		RPP40	RPP40_MOUSE	PUTATIVE RIBONUCLEASE P PROTEIN SUBUNIT P40 ISOFORM X2
1129	PORTHOMCL1129[AjBfCgCiDrGgLvMmOjOlPsSpXl|(28 genes, 13 taxa)]:	-0.374011	-0.188703	-0.534011	-0.139913	-0.930588	-0.0318529	0.200701	-0.719021	-0.723	0.578184	-0.0612745	-0.366513	INVS	ANKRD55;INVS	ANKRD55;INVS	LOC108704426;INVS.L;INVS.S;ANKRD55;INVS	INVS	ANKRD55;INVS	INVERSIN-LIKE, TRANSCRIPT VARIANT X4; INVERSIN-LIKE, TRANSCRIPT VARIANT X3; INVERSIN-LIKE, TRANSCRIPT VARIANT X1; INVERSIN-LIKE, TRANSCRIPT VARIANT X2		ANR55_HUMAN;INVS_HUMAN;INVS_CANLF;INVS	PUTATIVE ANKYRIN REPEAT DOMAIN-CONTAINING PROTEIN 55 ISOFORM X2	ANK2_MOUSE;ANR55_HUMAN	ANKYCORBIN;INVERSIN-LIKE;ANKYRIN REPEAT DOMAIN-CONTAINING PROTEIN 55, TRANSCRIPT VARIANT X1; ANKYRIN REPEAT DOMAIN-CONTAINING PROTEIN 55, TRANSCRIPT VARIANT X2;INVS
5711	PORTHOMCL5711[AjBfCgCiDrGgLvMmOjOlPsSpXl|(14 genes, 13 taxa)]:	-0.296538	-0.824835	-0.540989	-0.146912	-0.323113	-0.0572647	-0.704935	0.635315	-0.223412	-0.634097	-0.291789	-0.364942	DNAJC8	DNAJC8	DNAJC8	DNAJC8.S;DNAJC8.L;DNAJC8	DNAJC8	DNAJC8	DNAJ HOMOLOG SUBFAMILY C MEMBER 8-LIKE, TRANSCRIPT VARIANT X1; DNAJ HOMOLOG SUBFAMILY C MEMBER 8-LIKE, TRANSCRIPT VARIANT X2;DNAJC8		DNJC8_RAT	PUTATIVE DNAJ-LIKE SUBFAMILY C MEMBER 8 ISOFORM X2	DNJC8_HUMAN	DNAJ HOMOLOG SUBFAMILY C MEMBER 8, TRANSCRIPT VARIANT X2; DNAJ HOMOLOG SUBFAMILY C MEMBER 8, TRANSCRIPT VARIANT X1;DNAJC8
3327	PORTHOMCL3327[AjBfCgCiDrGgLvMmOjOlPsSpXl|(17 genes, 13 taxa)]:	-0.474286	-0.614813	-0.548407	-0.167623	-0.342819	-0.0375588	-0.855052	0.0788811	-0.575882	-0.507183	-0.685662	-0.364251	DDX47	DDX47	DDX56	DDX56.L;DDX56.S;DDX56	DDX56	DDX56	PROBABLE ATP-DEPENDENT RNA HELICASE DDX56;DDX56	DDX56	DDX56_BOVIN	PUTATIVE ATP-DEPENDENT RNA HELICASE DDX56;DDX56	DDX56_BOVIN;DDX56	PROBABLE ATP-DEPENDENT RNA HELICASE DDX56;DDX56
7881	PORTHOMCL7881[AjBfCgDrGgMmOjOlPsSpXl|(11 genes, 11 taxa)]:	-0.148956	-0.708396	-0.443626	-0.684657	-0.0286029	-0.168353	0	-0.480573	-0.614559	0	0.53701	-0.363765	USP9X	USP9X	USP9X	USP9X.S	USP9	USP9			USP9X_HUMAN	PUTATIVE UBIQUITIN CARBOXYL-TERMINAL HYDROLASE		PROBABLE UBIQUITIN CARBOXYL-TERMINAL HYDROLASE FAF-X;USP9X
10374	PORTHOMCL10374[BfDrGgMmOjOlPsXl|(8 genes, 8 taxa)]:	-0.562253	-0.507824	-0.539341	-0.41902	-0.0860049	-0.0585294	0	0.805455	0.0341873	0	0	-0.362162	GEMIN4	GEMIN4	GEMIN4	GEMIN4.L;GEMIN4	GEMIN4	GEMIN4
5058	PORTHOMCL5058[AjBfCgDrGgLvMmOlPsSpXl|(15 genes, 11 taxa)]:	-0.00505495	-0.714769	-0.468242	-0.520172	-0.216838	-0.240412	0	-0.108593	0	0.236574	0.0682404	-0.360915	ZFP64	ZFP64	ZFP64	LOC108700900;LOC108702602;ZFP64	ZFP64	ZFP64				PUTATIVE ZINC FINGER PROTEIN	ZF64A_HUMAN	ZINC FINGER AND BTB DOMAIN-CONTAINING PROTEIN 48, TRANSCRIPT VARIANT X2; ZINC FINGER AND BTB DOMAIN-CONTAINING PROTEIN 48, TRANSCRIPT VARIANT X1; ZINC FINGER AND BTB DOMAIN-CONTAINING PROTEIN 48, TRANSCRIPT VARIANT X3
8710	PORTHOMCL8710[AjDrGgMmOlPsSpXl|(10 genes, 8 taxa)]:	-0.246868	-0.640835	-0.787033	-0.204951	-0.182892	-0.0974412	0	0	0	0	-0.30098	-0.360003	ANKRD11	ANKRD11	ANKRD11	ANKRD11.L;ANKRD11.S;ANKRD11	ANKRD11	ANKRD11				PUTATIVE ANKYRIN REPEAT DOMAIN-CONTAINING PROTEIN 12		ANKYRIN REPEAT DOMAIN-CONTAINING PROTEIN 12
6197	PORTHOMCL6197[AjBfCgCiDrGgLvMmOjOlPsXl|(13 genes, 12 taxa)]:	-0.410055	-0.541495	-0.184066	-0.697279	-0.038848	-0.273824	-0.66587	-0.44442	-0.794765	-0.941404	0	-0.357594	NCLN	NCLN	NCLN	MGC79091;NCLN	NCLN	NCL1;ZGC:109965	NICALIN-1-LIKE;NCLN	NCLN	NCLN_DANRE;NCLN	HYPOTHETICAL PROTEIN;NCLN	NCLN_DANRE;NCLN
2397	PORTHOMCL2397[AjBfCgCiDrGgLvMmOjOlPsSpXl|(20 genes, 13 taxa)]:	-0.416484	-0.426462	-0.0985165	-0.577132	-0.205049	-0.419324	-0.605792	-0.300519	-0.158824	-0.168586	-0.577819	-0.357161	SLC25A3	SLC25A3	SLC25A3	SLC25A3.S;SLC25A3.L;SLC25A3	SLC25A3A;SLC25A3	SLC25A3A;SLC25A3B;SLC25A3	PHOSPHATE CARRIER PROTEIN, MITOCHONDRIAL;SLC25A3	SLC25A3	MPCP_MOUSE;MPCP_CHOFU;SLC25A3	PUTATIVE PHOSPHATE CARRIER PROTEIN, MITOCHONDRIAL;SLC25A3	MPCP_MOUSE;SLC25A3	PHOSPHATE CARRIER PROTEIN, MITOCHONDRIAL;SLC25A3
2576	PORTHOMCL2576[AjBfCgCiDrGgLvMmOjOlPsSpXl|(19 genes, 13 taxa)]:	-0.509176	-0.729231	-0.528297	-0.0607843	-0.257721	-0.0547647	-0.836844	0.60949	-0.672265	-0.795934	-0.359069	-0.356662	SMC6	SMC6	SMC6	SMC6.L	SI:DKEY-119F1.1;SMC6;SPAST	SMC6	STRUCTURAL MAINTENANCE OF CHROMOSOMES PROTEIN 6		SMC6_HUMAN	PUTATIVE STRUCTURAL MAINTENANCE OF CHROMOSOMES PROTEIN 6-LIKE;HYPOTHETICAL PROTEIN	SMC6_HUMAN;SMC6_XENLA	STRUCTURAL MAINTENANCE OF CHROMOSOMES PROTEIN 6;STRUCTURAL MAINTENANCE OF CHROMOSOMES PROTEIN 6, TRANSCRIPT VARIANT X2; STRUCTURAL MAINTENANCE OF CHROMOSOMES PROTEIN 6, TRANSCRIPT VARIANT X1
2995	PORTHOMCL2995[AjBfCgCiDrGgLvMmOjOlPsSpXl|(18 genes, 13 taxa)]:	-0.12533	-0.443648	-0.373626	-0.457255	-0.589828	-0.139706	-0.836961	0.516503	-0.0752059	-0.691909	-0.568995	-0.354899	MANF	MANF;CDNF	MANF;CDNF	MANF.L;CDNF.L;MANF.S;CDNF;MANF	MANF	MANF;CDNF	MESENCEPHALIC ASTROCYTE-DERIVED NEUROTROPHIC FACTOR HOMOLOG	MANF	ARMET_DROSE	ARMET-LIKE PROTEIN;MANF	ARMET_DROYA;MANF	MESENCEPHALIC ASTROCYTE-DERIVED NEUROTROPHIC FACTOR HOMOLOG;CDNF
2747	PORTHOMCL2747[BfCgDrGgMmOjOlPsXl|(19 genes, 9 taxa)]:	-0.519451	-0.482769	-0.691154	-0.237549	-0.10576	-0.0824412	0	-0.463377	0.0627059	0	0	-0.353187	ARMC10	ARMC12;ARMC10	ARMC10;ARMCX4;ARMCX2;ARMC12;ARMCX3;ARMCX1;BHLHB9;ARMCX5;ARMCX6;GPRASP1	ARMC10.L;ARMC10	ARMC10	ARMC10			ARM10_HUMAN
7725	PORTHOMCL7725[BfCiDrGgMmOjOlPsXl|(12 genes, 9 taxa)]:	-0.543297	-0.514198	-0.254121	-0.292328	-0.259779	-0.253529	-0.889857	-0.752657	-0.895147	0	0	-0.352875	CLINT1	CLINT1	CLINT1	CLINT1.S;CLINT1.L;CLINT1	CLINT1A;CLINT1 (1 OF MANY);CLINT1	CLINT1A;CLINT1 (1 OF MANY)	CLATHRIN INTERACTOR 1-LIKE		EPN4_BOVIN;CLINT1
10338	PORTHOMCL10338[BfCgDrGgMmOlPsXl|(8 genes, 8 taxa)]:	-0.0331868	-0.847253	-0.335495	-0.196765	-0.139436	-0.556265	0	-0.434039	0	0	0	-0.3514	DFFA	DFFA	DFFA	LOC108696357;DFFA	DFFA	DFFA
13126	PORTHOMCL13126[DrGgMmOlPsXl|(6 genes, 6 taxa)]:	-0.0768681	-0.601055	-0.580989	-0.263848	-0.379583	-0.201882	0	0	0	0	0	-0.350704	YBX1	YBX1	YBX1	NSEP1	YBX1	YBX1
6473	PORTHOMCL6473[AjBfCgCiDrGgLvMmOlPsSpXl|(13 genes, 12 taxa)]:	-0.0908242	-0.63156	-0.453956	-0.373309	-0.529191	-0.0247059	-0.865	-0.135594	0	-0.611455	-0.369608	-0.350591	DNAJC21	DNAJC21	DNAJC21	DNAJC21.L;DNAJC21	DNAJC21	DNAJC21	ZN-FINGER (U1-LIKE)-8, TRANSCRIPT VARIANT X1; ZN-FINGER (U1-LIKE)-8;DNAJC21	DNAJC21		HYPOTHETICAL PROTEIN;DNAJC21	DJC21_BOVIN;DNAJC21	DNAJ HOMOLOG SUBFAMILY C MEMBER 21
6393	PORTHOMCL6393[AjBfCgCiDrGgLvMmOjOlPsSpXl|(13 genes, 13 taxa)]:	-0.431593	-0.695165	-0.550714	-0.291103	-0.0572794	-0.068	-0.813117	0	-0.348206	-0.80483	-0.631985	-0.348976	UTP15	UTP15	UTP15	UTP15.L	UTP15	UTP15	U3 SMALL NUCLEOLAR RNA-ASSOCIATED PROTEIN 15 HOMOLOG;UTP15	UTP15	UTP15_CHICK;UTP15	UTP15, U3 SMALL NUCLEOLAR RIBONUCLEOPROTEIN	UTP15_CHICK;UTP15	UTP15, U3 SMALL NUCLEOLAR RIBONUCLEOPROTEIN, HOMOLOG (S. CEREVISIAE)-LIKE;UTP15
1334	PORTHOMCL1334[AjBfCgCiDrGgLvMmOjOlPsSpXl|(26 genes, 13 taxa)]:	-0.352363	-0.860967	-0.614011	-0.233235	-0.00541667	-0.0217353	-0.750506	-0.656501	-0.851735	-0.764954	-0.609338	-0.347955	RECQL5	RECQL5	RECQL5	RECQL5.L;BLM.L;RECQL5;BLM	RECQL5	RECQL5	ATP-DEPENDENT DNA HELICASE Q5-LIKE	RECQL5	RECQ5_HUMAN	PUTATIVE ATP-DEPENDENT DNA HELICASE Q5	RECQ5_HUMAN	ATP-DEPENDENT DNA HELICASE Q5;ATP-DEPENDENT DNA HELICASE Q5-LIKE, TRANSCRIPT VARIANT X1; ATP-DEPENDENT DNA HELICASE Q5-LIKE, TRANSCRIPT VARIANT X2
4951	PORTHOMCL4951[AjBfCgCiDrGgLvMmOjOlPsSpXl|(15 genes, 13 taxa)]:	-0.357418	-0.574769	-0.531758	-0.0124265	-0.350294	-0.258324	-0.0160909	-0.45875	-0.852353	-0.754964	-0.661642	-0.347498	PPAT	PPAT	PPAT	PPAT.S;PPAT.L;PPAT	PPAT	PPAT	AMIDOPHOSPHORIBOSYLTRANSFERASE-LIKE, TRANSCRIPT VARIANT X1; AMIDOPHOSPHORIBOSYLTRANSFERASE-LIKE, TRANSCRIPT VARIANT X2;PPAT	PPAT	PUR1_CHICK;PUR1_HUMAN;PPAT	PUTATIVE AMIDOPHOSPHORIBOSYLTRANSFERASE	ATP7B_MOUSE	AMIDOPHOSPHORIBOSYLTRANSFERASE;PPAT
3856	PORTHOMCL3856[AjBfCgCiDrGgLvMmOjOlPsSpXl|(16 genes, 13 taxa)]:	-0.458901	-0.582901	-0.552802	-0.202623	-0.219412	-0.0680882	-0.835169	-0.504893	-0.364382	-0.534943	-0.771814	-0.347454	NOC4L	NOC4L	NOC4L	NOC4L.L;NOC4L.S;NOC4L	NOC4L	NOC4L	NUCLEOLAR COMPLEX PROTEIN 4 HOMOLOG B-LIKE	NOC4L	NOC4B_XENLA	PUTATIVE NUCLEOLAR COMPLEX PROTEIN 4-LIKE;NOC4L	NOC4B_XENLA;NOC4L	NUCLEOLAR COMPLEX PROTEIN 4 HOMOLOG;NOC4L
2648	PORTHOMCL2648[AjBfCgCiDrGgLvMmOjOlPsSpXl|(19 genes, 13 taxa)]:	-0.0362088	-0.710637	-0.508352	-0.283529	-0.517426	-0.0278824	0.386774	0.74049	-0.889794	-0.276863	-0.690441	-0.347339	LTN1	LTN1	LTN1	LTN1.L;LTN1	SI:DKEY-175G6.5;LTN1	LTN1	E3 UBIQUITIN-PROTEIN LIGASE LISTERIN-LIKE		LTN1_CHICK	PUTATIVE E3 UBIQUITIN-PROTEIN LIGASE LISTERIN-LIKE;PUTATIVE E3 UBIQUITIN-PROTEIN LIGASE LISTERIN;HYPOTHETICAL PROTEIN	LTN1_HUMAN	UNCHARACTERIZED LOC100893267;E3 UBIQUITIN-PROTEIN LIGASE LISTERIN
2572	PORTHOMCL2572[AjBfCgCiDrGgLvMmOjOlPsSpXl|(19 genes, 13 taxa)]:	-0.634615	-0.719297	-0.474615	-0.223922	-0.0156618	-0.0153529	-0.801234	-0.345262	-0.628735	0.209247	0.11201	-0.347244	MPP5	MPP5	MPP5	PTPN3.S;MPP5.L;PTPN3;MPP5	MPP5 (1 OF MANY);MPP5B	MPP5A;MPP5B;MPP5	MAGUK P55 SUBFAMILY MEMBER 5-LIKE, TRANSCRIPT VARIANT X2; MAGUK P55 SUBFAMILY MEMBER 5-LIKE, TRANSCRIPT VARIANT X3; MAGUK P55 SUBFAMILY MEMBER 5-LIKE, TRANSCRIPT VARIANT X1;MPP5	MPP5	MPP5_MOUSE;MPP5	HYPOTHETICAL PROTEIN;PUTATIVE MAGUK P55 SUBFAMILY MEMBER 5 ISOFORM X2	MPP5_HUMAN	UNCHARACTERIZED LOC105445791, TRANSCRIPT VARIANT X2; UNCHARACTERIZED LOC105445791, TRANSCRIPT VARIANT X1;MAGUK P55 SUBFAMILY MEMBER 5, TRANSCRIPT VARIANT X2; MAGUK P55 SUBFAMILY MEMBER 5, TRANSCRIPT VARIANT X1;MPP5
5712	PORTHOMCL5712[AjBfCgCiDrGgLvMmOjOlPsSpXl|(14 genes, 13 taxa)]:	-0.265824	-0.549538	-0.616703	-0.219289	-0.122034	-0.302735	-0.860623	0	-0.703853	-0.767513	-0.75674	-0.346021	PRIM1	PRIM1	PRIM1	PRIM1.S;PRIM1	PRIM1	PRIM1	DNA PRIMASE SMALL SUBUNIT;PRIM1	PRIM1	PRI1_HUMAN;PRIM1	PUTATIVE DNA PRIMASE SMALL SUBUNIT-LIKE;PRIM1	PRI1_MOUSE;PRIM1	DNA PRIMASE SMALL SUBUNIT-LIKE;PRIM1
777	PORTHOMCL777[AjBfCgCiDrGgLvMmOjOlPsSpXl|(33 genes, 13 taxa)]:	-0.111593	-0.0737582	-0.831868	-0.21598	-0.377917	-0.463618	0.215	0.855804	-0.0664706	-0.738039	-0.41299	-0.345789	TEAD1;TEAD4;TEAD3	TEAD1;TEAD4;TEAD3	TEAD1;TEAD3;TEAD4;TEAD2	TEAD1.S;TEAD1.L;TEAD4.S;TEAD4.L;TEAD1;TEAD2	TEAD1A;TEAD1B;TEA DOMAIN TRANSCRIPTION FACTOR 4;TEAD3B;TRANSCRIPTIONAL ENHANCER FACTOR TEF-5;TEAD1;TEAD4;TEAD3	TEAD1A;TEAD1B;TEAD3A;TEAD3B;CABZ01090021.1;TEAD1;TEAD3;TEAD4	CI-SCALLOPED/TEF1, TRANSCRIPT VARIANT X1; CI-SCALLOPED/TEF1; CI-SCALLOPED/TEF1;TRANSCRIPTIONAL ENHANCER FACTOR TEF-3-LIKE;TEAD2	TEAD4	TEAD1_HUMAN	PUTATIVE TRANSCRIPTIONAL ENHANCER FACTOR TEF-1 ISOFORM X9;HYPOTHETICAL PROTEIN;TEAD4	TEAD1_HUMAN;TEAD1	TRANSCRIPTIONAL ENHANCER FACTOR TEF-1, TRANSCRIPT VARIANT X1; TRANSCRIPTIONAL ENHANCER FACTOR TEF-1, TRANSCRIPT VARIANT X4; TRANSCRIPTIONAL ENHANCER FACTOR TEF-1, TRANSCRIPT VARIANT X3; TRANSCRIPTIONAL ENHANCER FACTOR TEF-1, TRANSCRIPT VARIANT X2;TEAD4
2839	PORTHOMCL2839[AjBfCgCiDrGgLvMmOjOlPsSpXl|(18 genes, 13 taxa)]:	-0.0915934	-0.206374	-0.565604	-0.521176	-0.301446	-0.385265	-0.784208	-0.612406	0.814029	0.483013	-0.152328	-0.345243		CDC37	CDC37	CDC37.S;CDC37.L;CDC37	CDC37;HSP90 CO-CHAPERONE CDC37-LIKE	CABZ01093425.1	HSP90 CO-CHAPERONE CDC37;CDC37	CDC37	CDC37_HUMAN;CDC37	PUTATIVE HSP90 CO-CHAPERONE CDC37-LIKE;CDC37	CDC37_HUMAN;CDC37	HSP90 CO-CHAPERONE CDC37;HSP90 CO-CHAPERONE CDC37, TRANSCRIPT VARIANT X3; HSP90 CO-CHAPERONE CDC37, TRANSCRIPT VARIANT X2; HSP90 CO-CHAPERONE CDC37, TRANSCRIPT VARIANT X1;CDC37
11694	PORTHOMCL11694[DrGgMmOlPsXl|(7 genes, 6 taxa)]:	-0.528901	-0.244044	-0.55522	-0.21424	-0.369461	-0.144382	0	0	0	0	0	-0.342708	CXCR4	CXCR4	CXCR4	CXCR4.S	CXCR4A;CXCR4	CXCR4A;CXCR4B;CXCR4
11482	PORTHOMCL11482[CgDrGgMmOlPsXl|(7 genes, 7 taxa)]:	-0.393791	-0.551516	-0.370714	-0.169412	-0.531814	-0.0213824	0	0	0	0	0	-0.339772	CCDC137	CCDC137	CCDC137	LOC108702709;CCDC137	COILED-COIL DOMAIN CONTAINING 137;CCDC137	CCDC137
1842	PORTHOMCL1842[AjBfCgDrGgLvMmOjOlPsSpXl|(22 genes, 12 taxa)]:	-0.379615	-0.0632527	-0.897198	-0.359485	-0.212966	-0.125824	0	-0.613147	0.392324	0.595315	0.672181	-0.339723	NXN	NXN	NXN	NXN.L;NXN.S;NXN	NUCLEOREDOXIN	NXN		NXNL2	NXN_MOUSE	PUTATIVE NUCLEOREDOXIN-LIKE	NXN_DANRE;NXN_BOVIN	NUCLEOREDOXIN;TRYPAREDOXIN-LIKE;NXN
4755	PORTHOMCL4755[AjBfCgCiDrGgLvMmOjOlPsSpXl|(15 genes, 13 taxa)]:	-0.493407	-0.692527	-0.539505	-0.121176	-0.0543873	-0.134265	-0.773779	0.377273	-0.817353	-0.784954	-0.575858	-0.339211	NOP14	NOP14	NOP14	NOP14.L;NOP14	NOP14	NOP14	NUCLEOLAR PROTEIN 14-LIKE;NOP14		NOP14_HUMAN;NOP14	PUTATIVE NUCLEOLAR PROTEIN 14;NOP14	NOP14_HUMAN;NOP14	NUCLEOLAR PROTEIN 14;NOP14
5504	PORTHOMCL5504[AjBfCgCiDrGgLvMmOjOlPsSpXl|(14 genes, 13 taxa)]:	-0.379011	-0.420747	-0.543077	-0.076152	-0.323456	-0.292471	0.880727	-0.24965	-0.487235	0.7745	0.368888	-0.339152	DJ-1;PARK7	PARK7	PARK7	PARK7.L	PARK7	PARK7	PROTEIN DEGLYCASE DJ-1-LIKE	PARK7	PARK7_BOVIN;PARK7	HYPOTHETICAL PROTEIN	PARK7_HUMAN;PARK7	PROTEIN DEGLYCASE DJ-1-LIKE;PARK7
2854	PORTHOMCL2854[AjBfCgCiDrGgLvMmOjOlPsSpXl|(18 genes, 13 taxa)]:	-0.196374	-0.076967	-0.0908791	-0.679632	-0.0267157	-0.957529	-0.893701	-0.617528	-0.825971	-0.867843	-0.555392	-0.338016	SEC22B	SEC22B	SEC22B	SEC22B.L;SEC22B	SEC22BB;VESICLE-TRAFFICKING PROTEIN SEC22B;SEC22B	SEC22BB;SEC22BA;SEC22B	VESICLE-TRAFFICKING PROTEIN SEC22B;SEC22B	SEC22B	SC22B_CHICK;SEC22B	PUTATIVE VESICLE-TRAFFICKING PROTEIN SEC22B;SEC22B	SC22B_RAT;SEC22B	VESICLE-TRAFFICKING PROTEIN SEC22B;SEC22B
3104	PORTHOMCL3104[AjCgCiDrGgLvMmOjOlPsSpXl|(18 genes, 12 taxa)]:	-0.0257143	-0.709011	-0.537802	-0.163701	-0.300882	-0.290088	-0.670429	0	-0.0995588	-0.660186	-0.115074	-0.337867	CNOT4	CNOT4	CNOT4	CNOT4.L;CNOT4	CNOT4A;CNOT4	CNOT4A;CNOT4B;CNOT4	UNCHARACTERIZED LOC100175100		CNOT4_HUMAN	PUTATIVE CCR4-NOT TRANSCRIPTION COMPLEX SUBUNIT 4-LIKE ISOFORM X1;PUTATIVE CCR4-NOT TRANSCRIPTION COMPLEX SUBUNIT 4-LIKE ISOFORM X2;CNOT4	CNOT4_HUMAN;CNOT4_MOUSE	CCR4-NOT TRANSCRIPTION COMPLEX SUBUNIT 4
1439	PORTHOMCL1439[AjBfCgCiDrGgLvMmOjOlPsSpXl|(25 genes, 13 taxa)]:	-0.525824	-0.391251	-0.366424	-0.0628382	-0.546618	-0.133275	0.0811487	-0.509151	-0.0109642	-0.495079	-0.345188	-0.337705	T;TBX19;TBXT	F8V3L3_PELSI;TBX19;TBXT	T;TBX19;TBXT	T.S	ME-T;TBXTB;TBXT	TA;TB;TBX19;TBXT	TRANSCRIPTION FACTOR PROTEIN;TBXT	TBXT	BRAC1_BRAFL	BRACHYURY;TRANSCRIPTION FACTOR BRACHYURY;TBXT	BRAC_HEMPU;TBXT	BRACHYURY PROTEIN HOMOLOG, TRANSCRIPT VARIANT X2; BRACHYURY PROTEIN HOMOLOG, TRANSCRIPT VARIANT X1
6579	PORTHOMCL6579[AjBfCgCiDrGgLvMmOjOlPsSpXl|(13 genes, 13 taxa)]:	-0.27467	-0.0543837	-0.904011	-0.248309	-0.439534	-0.100676	-0.850325	-0.500717	-0.109059	-0.0318679	-0.215809	-0.336931		SRRM3	SRRM2	SRRM2.L;EPB41	SERINE/ARGININE REPETITIVE MATRIX PROTEIN 2	SRRM2	SERINE/ARGININE REPETITIVE MATRIX PROTEIN 2-LIKE		MMP14_PONAB	PUTATIVE SERINE/ARGININE REPETITIVE MATRIX PROTEIN 2 ISOFORM X3;SRRM2	SRRM2_HUMAN;LOC106172769	SERINE/ARGININE REPETITIVE MATRIX PROTEIN 2, TRANSCRIPT VARIANT X2; SERINE/ARGININE REPETITIVE MATRIX PROTEIN 2, TRANSCRIPT VARIANT X5; SERINE/ARGININE REPETITIVE MATRIX PROTEIN 2, TRANSCRIPT VARIANT X3; SERINE/ARGININE REPETITIVE MATRIX PROTEIN 2, TRANSCRIPT VARIANT X1; SERINE/ARGININE REPETITIVE MATRIX PROTEIN 2, TRANSCRIPT VARIANT X4;SRRM2
5176	PORTHOMCL5176[AjBfCgCiDrGgLvMmOjOlPsSpXl|(14 genes, 13 taxa)]:	-0.475934	-0.30611	-0.40544	-0.243039	-0.42678	-0.157294	-0.872883	-0.439333	-0.853971	0.193457	-0.599877	-0.335766	COX11	COX11	COX11	COX11.L;COX11	COX11	COX11	CYTOCHROME C OXIDASE ASSEMBLY PROTEIN COX11, MITOCHONDRIAL-LIKE;COX11	COX11	DRG2_MOUSE;COX11	PUTATIVE CYTOCHROME C OXIDASE ASSEMBLY PROTEIN COX11, MITOCHONDRIAL;COX11	COX11_MOUSE;COX11	CYTOCHROME C OXIDASE ASSEMBLY PROTEIN COX11, MITOCHONDRIAL;CYTOCHROME C OXIDASE ASSEMBLY PROTEIN COX11, MITOCHONDRIAL-LIKE;COX11
5576	PORTHOMCL5576[AjBfCgCiDrGgLvMmOjOlPsSpXl|(14 genes, 13 taxa)]:	-0.521374	-0.393275	-0.898846	-0.103848	-0.0421814	-0.0430588	-0.864558	-0.439333	-0.458647	-0.660908	-0.678064	-0.333764	DGCR14;ESS2	DGCR14;ESS2	DGCR14;ESS2	DGCR14.L;DGCR14.S;ESS2	ESS2	DGCR14;ESS2	PROTEIN DGCR14, TRANSCRIPT VARIANT X2; PROTEIN DGCR14, TRANSCRIPT VARIANT X3; PROTEIN DGCR14, TRANSCRIPT VARIANT X1;ESS2	ESS2	DGC14_MOUSE;ESS2	HYPOTHETICAL PROTEIN;ESS2	DGC14_HUMAN;ESS2	PROTEIN DGCR14, TRANSCRIPT VARIANT X2; PROTEIN DGCR14, TRANSCRIPT VARIANT X3; PROTEIN DGCR14, TRANSCRIPT VARIANT X1;ESS2
8985	PORTHOMCL8985[BfDrGgMmOjOlPsSpXl|(10 genes, 9 taxa)]:	-0.462088	-0.0814066	-0.185549	-0.116162	-0.550838	-0.603202	0	-0.837832	0.58452	0	-0.231147	-0.333208	GATA4	GATA4	GATA4	GATA4.S	GATA4	GATA4			GATA4_XENLA			GATA TRANSCRIPTION FACTOR E, TRANSCRIPT VARIANT X2; GATA TRANSCRIPTION FACTOR E, TRANSCRIPT VARIANT X4; GATA TRANSCRIPTION FACTOR E, TRANSCRIPT VARIANT X3; GATA TRANSCRIPTION FACTOR E, TRANSCRIPT VARIANT X1; GATA TRANSCRIPTION FACTOR E
9447	PORTHOMCL9447[CgDrGgMmOlPsXl|(9 genes, 7 taxa)]:	-0.0954945	-0.501758	-0.760934	-0.0984559	-0.243873	-0.298206	0	0	0	0	0	-0.33312	ZBTB49	ZBTB49	ZBTB49	ZBTB49.L;ZBTB49	ZBTB49	ZBTB49
7069	PORTHOMCL7069[AjCgCiDrGgLvMmOjOlPsSpXl|(12 genes, 12 taxa)]:	-0.172582	-0.544659	-0.213132	-0.325981	-0.434363	-0.305853	-0.665247	0	-0.509618	0.160495	-0.052451	-0.332762	PRKX	PRKX	PRKX	LOC108707975;PRKX	PRKX	PRKX	CAMP-DEPENDENT PROTEIN KINASE CATALYTIC SUBUNIT PRKX-LIKE;PRKX		PRKX_HUMAN	PUTATIVE CAMP-DEPENDENT PROTEIN KINASE CATALYTIC SUBUNIT PRKX-LIKE	PRKX_HUMAN;PRKX	CAMP-DEPENDENT PROTEIN KINASE CATALYTIC SUBUNIT PRKX, TRANSCRIPT VARIANT X1; CAMP-DEPENDENT PROTEIN KINASE CATALYTIC SUBUNIT PRKX, TRANSCRIPT VARIANT X2;PRKX
5204	PORTHOMCL5204[AjBfCgCiDrGgLvMmOjOlPsSpXl|(14 genes, 13 taxa)]:	-0.0258242	-0.703209	-0.568736	-0.0118137	-0.606593	-0.0674118	-0.722091	0.23418	-0.416706	-0.70324	-0.315564	-0.330598	ZRANB2	ZRANB2	ZRANB2	ZRANB2.S;ZRANB2.L;ZRANB2	ZRANB2	ZRANB2	ZINC FINGER PROTEIN, TRANSCRIPT VARIANT X4; ZINC FINGER PROTEIN, TRANSCRIPT VARIANT X1; ZINC FINGER PROTEIN, TRANSCRIPT VARIANT X3; ZINC FINGER PROTEIN, TRANSCRIPT VARIANT X5; ZINC FINGER PROTEIN;ZRANB2	ZRANB2	ZRAB2_CHICK;ZRANB2	PUTATIVE ZINC FINGER RAN-BINDING DOMAIN-CONTAINING PROTEIN 2 ISOFORM X2;EOG090X0ECZ	ZRAB2_CHICK;EOG090X0ECZ	ZINC FINGER RAN-BINDING DOMAIN-CONTAINING PROTEIN 2, TRANSCRIPT VARIANT X1; ZINC FINGER RAN-BINDING DOMAIN-CONTAINING PROTEIN 2, TRANSCRIPT VARIANT X2; ZINC FINGER RAN-BINDING DOMAIN-CONTAINING PROTEIN 2, TRANSCRIPT VARIANT X3;ZRANB2
4999	PORTHOMCL4999[BfCgCiDrGgLvMmOlPsSpXl|(15 genes, 11 taxa)]:	-0.124121	-0.797319	-0.403846	-0.136495	-0.449338	-0.0647353	-0.740701	-0.721589	0	0.389721	0.611427	-0.329309	RDH10	RDH10	RDH10	RDH10.S;RDH10.L;RDH10	RETINOL DEHYDROGENASE 10-A;RDH10A;RDH10	RDH20;RDH10B;RDH10A;RDH10	ESTRADIOL 17-BETA-DEHYDROGENASE 11				RD10B_DANRE	RETINOL DEHYDROGENASE 10-B, TRANSCRIPT VARIANT X3; RETINOL DEHYDROGENASE 10-B, TRANSCRIPT VARIANT X2; RETINOL DEHYDROGENASE 10-B, TRANSCRIPT VARIANT X4; RETINOL DEHYDROGENASE 10-B, TRANSCRIPT VARIANT X1
10370	PORTHOMCL10370[BfCiDrGgMmOlPsXl|(8 genes, 8 taxa)]:	-0.428242	-0.0502857	-0.760385	-0.0895098	-0.0862255	-0.560324	0.283893	0.350699	0	0	0	-0.329162		C8ORF33	1110038F14RIK	C8ORF33.L	ZGC:112185	ZGC:112185	UPF0488 PROTEIN C8ORF33 HOMOLOG
9351	PORTHOMCL9351[CgDrGgMmOlPsXl|(9 genes, 7 taxa)]:	-0.14522	-0.538505	-0.746429	-0.0520588	-0.0479167	-0.433235	0	0	0	0	0	-0.327227	GLCCI1	GLCCI1	GLCCI1	GLCCI1.L	GLUCOCORTICOID-INDUCED TRANSCRIPT 1 PROTEIN;GLCCI1A;GLCCI1	GLCCI1;CABZ01078427.1
8795	PORTHOMCL8795[AjCgDrGgMmOlPsXl|(10 genes, 8 taxa)]:	-0.0976923	-0.646593	-0.456593	-0.265931	-0.444952	-0.0497941	0	0	0	0	0	-0.326926	COA5	COA5	COA5	LOC108709722;COA5.S;COA5	COA5	COA5				PUTATIVE CYTOCHROME C OXIDASE ASSEMBLY FACTOR 5-LIKE
4393	PORTHOMCL4393[AjCgCiDrGgLvMmOjOlPsSpXl|(15 genes, 12 taxa)]:	-0.268516	-0.551077	-0.28	-0.476054	-0.286397	-0.0855294	-0.83613	0	0.4415	-0.548958	-0.0876225	-0.324596	UBE2F	UBE2F	UBE2F;GM5434	LOC108701421;UBE2F.S;UBE2F	UBE2F	UBE2F	NEDD8-CONJUGATING ENZYME UBE2F-LIKE		UBE2F_CHICK;UBE2F	PUTATIVE UBIQUITIN PROTEIN LIGASE;UBE2F	UBE2F_BOVIN;UBE2F	NEDD8-CONJUGATING ENZYME UBE2F;UBE2F
4185	PORTHOMCL4185[AjBfCgCiDrGgLvMmOjOlPsSpXl|(16 genes, 13 taxa)]:	-0.232527	-0.276527	-0.740604	-0.379044	-0.276299	-0.0331765	-0.920779	0.227413	-0.883676	-0.34871	-0.593873	-0.32303	CDK10	CDK10	CDK10	CDK10.L;CDK10	CDK10	CDK10	CYCLIN-DEPENDENT KINASE 10-LIKE;CDK10	CDK10	CD11B_HUMAN;CDK10_BOVIN	PUTATIVE CYCLIN-DEPENDENT KINASE 10;SERINE/THREONINE PROTEIN KINASE;CDK10	CDK10_HUMAN	CYCLIN-DEPENDENT KINASE 10, TRANSCRIPT VARIANT X2; CYCLIN-DEPENDENT KINASE 10, TRANSCRIPT VARIANT X1;CYCLIN-DEPENDENT KINASE 10;CDK10
2578	PORTHOMCL2578[AjBfCgCiDrGgLvMmOjOlPsSpXl|(19 genes, 13 taxa)]:	-0.187308	-0.725187	-0.442088	-0.240931	-0.187108	-0.144294	-0.0204026	-0.225385	-0.214706	-0.821176	-0.173039	-0.321153	TRIP12	TRIP12	TRIP12	TRIP12.S;TRIP12.L;TRIP12	TRIP12	TRIP12	E3 UBIQUITIN-PROTEIN LIGASE TRIP12	TRIP12	TRIPC_MOUSE;TRIP12	PUTATIVE E3 UBIQUITIN-PROTEIN LIGASE TRIP12 ISOFORM X1;PUTATIVE E3 UBIQUITIN-PROTEIN LIGASE TRIP12 ISOFORM X2	TRIPC_HUMAN;TRIPC_XENTR;TRIP12	E3 UBIQUITIN-PROTEIN LIGASE TRIP12, TRANSCRIPT VARIANT X1; E3 UBIQUITIN-PROTEIN LIGASE TRIP12, TRANSCRIPT VARIANT X2;E3 UBIQUITIN-PROTEIN LIGASE TRIP12-LIKE
9702	PORTHOMCL9702[BfCiDrGgMmOjOlPsXl|(9 genes, 9 taxa)]:	-0.0448352	-0.110769	-0.471044	-0.432574	-0.51348	-0.338176	-0.723104	0.261189	0.465382	0	0	-0.31848	MRPL34	MRPL34	MRPL34	MRPL34.L;MRPL34	MRPL34	MRPL34	UNCHARACTERIZED LOC100185340	MRPL34	RM34_YEAST
8957	PORTHOMCL8957[BfCiDrGgMmOlPsXl|(10 genes, 8 taxa)]:	-0.376923	-0.352176	-0.557363	-0.176127	-0.35424	-0.0912647	-0.653169	0.496297	0	0	0	-0.318016	YTHDF1	YTHDF1	YTHDF1	YTHDF1.L;YTHDF1	YTHDF1 (1 OF MANY)	YTHDF1	YTH DOMAIN-CONTAINING FAMILY PROTEIN 3;YTHDF2
9391	PORTHOMCL9391[DrGgMmOlPsXl|(9 genes, 6 taxa)]:	-0.0255495	-0.726066	-0.441813	-0.117653	-0.150588	-0.440382	0	0	0	0	0	-0.317009	CHCHD6	CHCHD6	CHCHD6	CHCHD6-B;CHCHD6.S;CHCHD6	CHCHD6A;CHCHD6B;LOC101174907	CHCHD6A;CHCHD6B
13142	PORTHOMCL13142[DrGgMmOlPsXl|(6 genes, 6 taxa)]:	-0.478022	-0.721451	-0.572253	-0.0675	-0.0236765	-0.0345882	0	0	0	0	0	-0.316248	NIN	NIN	NIN	NIN.L	NIN	NIN
5923	PORTHOMCL5923[AjCgCiDrGgLvMmOjOlPsSpXl|(14 genes, 12 taxa)]:	-0.408022	-0.560879	-0.43544	-0.0618873	-0.370172	-0.0596176	-0.868286	0	-0.622176	0.170479	-0.35007	-0.316003	MOCS3	MOCS3	MOCS3	MOCS3.L;MOCS3	MOCS3	MOCS3	ADENYLYLTRANSFERASE AND SULFURTRANSFERASE MOCS3-LIKE;MOCS3		MOCS3_DANRE	PUTATIVE ADENYLYLTRANSFERASE AND SULFURTRANSFERASE MOCS3-LIKE ISOFORM X1;PUTATIVE ADENYLYLTRANSFERASE AND SULFURTRANSFERASE MOCS3-LIKE;MOCS3	MOCS3_DANRE;MOCS3	ADENYLYLTRANSFERASE AND SULFURTRANSFERASE MOCS3-LIKE, TRANSCRIPT VARIANT X2; ADENYLYLTRANSFERASE AND SULFURTRANSFERASE MOCS3-LIKE, TRANSCRIPT VARIANT X1; ADENYLYLTRANSFERASE AND SULFURTRANSFERASE MOCS3-LIKE, TRANSCRIPT VARIANT X3;MOCS3
1420	PORTHOMCL1420[AjBfCgCiDrGgLvMmOjOlPsSpXl|(25 genes, 13 taxa)]:	-0.6787	-0.162602	-0.0410284	-0.261672	-0.375486	-0.36303	-0.720597	-0.357762	0.291235	0.324743	0.190415	-0.313753	RFX6	RFX6;RFX8	RFX6	RFX6.L;RFX6	RFX6	RFX6	DNA-BINDING PROTEIN RFX6-LIKE	RFX6;RFX4	RFX3_XENTR;RFX6_AILME;RFX2	PUTATIVE DNA-BINDING PROTEIN RFX6-LIKE;HYPOTHETICAL PROTEIN;PUTATIVE DNA-BINDING PROTEIN RFX6;RFX6	RFX6_DANRE;RFX6	DNA-BINDING PROTEIN RFX6;RFX6
7404	PORTHOMCL7404[AjBfCgCiDrGgLvMmOlPsSpXl|(12 genes, 12 taxa)]:	-0.25044	-0.497538	-0.256593	-0.534828	-0.127574	-0.214	-0.856208	0.0434965	0	-0.00222309	-0.260907	-0.313496	ASCC1	ASCC1	ASCC1	ASCC1.L;ASCC1	ASCC1	ASCC1	ACTIVATING SIGNAL COINTEGRATOR 1 COMPLEX SUBUNIT 1-LIKE;ASCC1	ASCC1		PUTATIVE ACTIVATING SIGNAL COINTEGRATOR 1 COMPLEX SUBUNIT 1-LIKE;ASCC1	ASCC1_MOUSE;ASCC1	ACTIVATING SIGNAL COINTEGRATOR 1 COMPLEX SUBUNIT 1
5741	PORTHOMCL5741[AjBfCgCiDrGgLvMmOjOlPsSpXl|(14 genes, 13 taxa)]:	-0.0860989	-0.760923	-0.73011	-0.0691176	-0.159583	-0.0621471	-0.142039	0.171679	0.372206	-0.43808	-0.358211	-0.31133	ERCC4	ERCC4	ERCC4	ERCC4.L;ERCC4	ERCC4	ERCC4	DNA REPAIR ENDONUCLEASE XPF	ERCC4	XPF_MOUSE	PUTATIVE DNA REPAIR ENDONUCLEASE XPF ISOFORM X3;ERCC4	XPF_MOUSE	DNA REPAIR ENDONUCLEASE XPF, TRANSCRIPT VARIANT X2; DNA REPAIR ENDONUCLEASE XPF, TRANSCRIPT VARIANT X1; DNA REPAIR ENDONUCLEASE XPF, TRANSCRIPT VARIANT X3;DNA REPAIR ENDONUCLEASE XPF-LIKE;ERCC4
3072	PORTHOMCL3072[AjBfCgCiDrGgLvMmOjOlPsSpXl|(18 genes, 13 taxa)]:	-0.0899451	-0.660703	-0.447308	-0.157328	-0.226348	-0.267559	-0.603519	-0.0398738	0.367706	-0.487307	-0.0775735	-0.308199	WDR60	WDR60	WDR60	WDR60.L;WDR60.S;WDR60	WDR60	WDR60	WD REPEAT-CONTAINING PROTEIN 60-LIKE		WDR60_MOUSE	PUTATIVE WD REPEAT-CONTAINING PROTEIN 60 ISOFORM X2	WDR60_MOUSE;WDR60	WD REPEAT-CONTAINING PROTEIN 60, TRANSCRIPT VARIANT X1; WD REPEAT-CONTAINING PROTEIN 60, TRANSCRIPT VARIANT X2;WDR60
3754	PORTHOMCL3754[AjBfCgCiDrGgLvMmOjOlPsSpXl|(16 genes, 13 taxa)]:	-0.00368132	-0.700088	-0.488297	-0.0914461	-0.330539	-0.227529	-0.482766	-0.434039	-0.859265	0.00908153	-0.402083	-0.30693	TBC1D13	TBC1D13	TBC1D13	TBC1D13.L;TBC1D13.S;TBC1D13	TBC1D13	TBC1D13	TBC1 DOMAIN FAMILY MEMBER 13;TBC1D13	TBC1D13	TBC13_HUMAN;TBC1D13	PUTATIVE TBC1 DOMAIN FAMILY MEMBER 13-LIKE;TBC1D13	TBC13_HUMAN;TBC1D13	TBC1 DOMAIN FAMILY MEMBER 13-LIKE;TBC1D13
4707	PORTHOMCL4707[AjBfCgCiDrGgMmOjOlPsSpXl|(15 genes, 12 taxa)]:	-0.198297	-0.0807033	-0.735495	-0.13201	-0.0363725	-0.655088	-0.614545	0.330559	-0.881441	0	0.116054	-0.306328	MTX2	MTX2	MTX2	LOC108703005;MTX2.L;MTX2	MTX2	MTX2	METAXIN-2-LIKE	MTX2	MTX2_PIG	PUTATIVE METAXIN-2;MTX2		METAXIN-2;MTX2
6768	PORTHOMCL6768[AjCgCiDrGgLvMmOjOlPsSpXl|(13 genes, 12 taxa)]:	-0.384835	-0.719473	-0.13011	-0.111593	-0.210809	-0.266794	-0.681273	0	0.489912	-0.728524	-0.167034	-0.303936	NDUFAF4	NDUFAF4	NDUFAF4	NDUFAF4.L;NDUFAF4	NDUFAF4	NDUFAF4	NADH DEHYDROGENASE [UBIQUINONE] 1 ALPHA SUBCOMPLEX ASSEMBLY FACTOR 4		NDUF4_MOUSE	PUTATIVE NADH DEHYDROGENASE;NDUFAF4	NDUF4_DROME	NADH DEHYDROGENASE [UBIQUINONE] 1 ALPHA SUBCOMPLEX ASSEMBLY FACTOR 4, TRANSCRIPT VARIANT X1; NADH DEHYDROGENASE [UBIQUINONE] 1 ALPHA SUBCOMPLEX ASSEMBLY FACTOR 4, TRANSCRIPT VARIANT X2
8028	PORTHOMCL8028[AjBfCgDrGgMmOjOlPsXl|(11 genes, 10 taxa)]:	-0.164286	-0.630462	-0.44544	-0.326569	-0.199657	-0.0434706	0	0.463566	-0.467059	0	0	-0.301647	CCDC84	CCDC84	CCDC84	CCDC84.S;CCDC84	CCDC84	CCDC84			CCD84_HUMAN;CCDC84	PUTATIVE COILED-COIL DOMAIN-CONTAINING PROTEIN
10359	PORTHOMCL10359[BfCgDrGgMmOlPsXl|(8 genes, 8 taxa)]:	-0.0995604	-0.457582	-0.444231	-0.334534	-0.173284	-0.284751	0	-0.403267	0	0	0	-0.29899	WDR53	WDR53	WDR53	WDR53.L;WDR53	WDR53	WDR53		WDR53
3394	PORTHOMCL3394[AjBfCgCiDrGgLvMmOjOlPsSpXl|(17 genes, 13 taxa)]:	-0.235824	-0.544791	-0.443736	-0.412108	-0.0214706	-0.119324	-0.807208	0.486853	0.914053	0.267307	0.070098	-0.296209	FBXW7	FBXW7	FBXW7	FBXW7.L	F-BOX/WD REPEAT-CONTAINING PROTEIN 7;FBXW7	FBXW7	F-BOX/WD REPEAT-CONTAINING PROTEIN 7-LIKE		FBXW7_HUMAN	PUTATIVE F-BOX/WD REPEAT-CONTAINING PROTEIN 7-LIKE;PUTATIVE F-BOX/WD REPEAT-CONTAINING PROTEIN 11	FBXW7_MOUSE;FBXW7_DROME	F-BOX/WD REPEAT-CONTAINING PROTEIN 11
4216	PORTHOMCL4216[AjCgDrGgLvMmOjOlPsSpXl|(16 genes, 11 taxa)]:	-0.17967	-0.730022	-0.207584	-0.1825	-0.456667	-0.0137647	0	0	-0.0904118	-0.0537668	-0.574877	-0.295035	ZFYVE28	ZFYVE28	ZFYVE28	ZFYVE28-LIKE.1.L;ZFYVE28-LIKE.1.S;ZFYVE28-LIKE.2.S;ZFYVE28	ZFYVE28	ZFYVE28			LST2_DANRE	PUTATIVE LATERAL SIGNALING TARGET PROTEIN 2 ISOFORM X2;PUTATIVE LATERAL SIGNALING TARGET PROTEIN 2-LIKE ISOFORM X1	LST2_XENTR;ZFYVE28	LATERAL SIGNALING TARGET PROTEIN 2 HOMOLOG, TRANSCRIPT VARIANT X2; LATERAL SIGNALING TARGET PROTEIN 2 HOMOLOG, TRANSCRIPT VARIANT X1
5810	PORTHOMCL5810[AjBfCgCiDrGgLvMmOjOlPsSpXl|(14 genes, 13 taxa)]:	-0.364725	-0.0872088	-0.548242	-0.312353	-0.179338	-0.271294	0.00332468	-0.41583	0.136912	-0.511284	-0.625245	-0.29386	NIP7	NIP7	NIP7	NIP7.L;NIP7	NIP7	NIP7	60S RIBOSOME SUBUNIT BIOGENESIS PROTEIN NIP7 HOMOLOG;NIP7	NIP7	NIP7_TETNG;NIP7_XENLA;NIP7	PUTATIVE 60S RIBOSOME SUBUNIT BIOGENESIS PROTEIN NIP7-LIKE ISOFORM X3;NIP7	NIP7_DANRE;NIP7	60S RIBOSOME SUBUNIT BIOGENESIS PROTEIN NIP7 HOMOLOG, TRANSCRIPT VARIANT X1; 60S RIBOSOME SUBUNIT BIOGENESIS PROTEIN NIP7 HOMOLOG, TRANSCRIPT VARIANT X2; 60S RIBOSOME SUBUNIT BIOGENESIS PROTEIN NIP7 HOMOLOG, TRANSCRIPT VARIANT X3;NIP7
12806	PORTHOMCL12806[DrGgMmOlPsXl|(6 genes, 6 taxa)]:	-0.206758	-0.199648	-0.397802	-0.276373	-0.387598	-0.282765	0	0	0	0	0	-0.291824	MKRN2	MKRN2	MKRN2	MKRN2.L;MKRN2	MKRN2	MKRN2
4912	PORTHOMCL4912[AjBfCgCiDrGgLvMmOjOlPsSpXl|(15 genes, 13 taxa)]:	-0.111099	-0.373758	-0.0362637	-0.80652	-0.344338	-0.0731765	-0.880403	-0.803007	0.574529	-0.22582	0.421936	-0.290859	CERK	CERK	CERK	CERK.L	CERK	CERK;CERK (1 OF MANY)	CERAMIDE KINASE-LIKE		CERK1_HUMAN;CERK	PUTATIVE CERAMIDE KINASE	CERK1_HUMAN;CERK	CERAMIDE KINASE;CERK
3968	PORTHOMCL3968[AjBfCgDrGgLvMmOjOlPsSpXl|(16 genes, 12 taxa)]:	-0.276813	-0.543297	-0.503846	-0.160025	-0.132549	-0.127294	0	-0.774377	-0.152882	0.0875086	-0.676593	-0.290637	TMTC3	TMTC3	TMTC3	TMTC3.L;TMTC3	TMTC3	TMTC3			TMTC3_HUMAN;TMTC3	HYPOTHETICAL PROTEIN;PUTATIVE TRANSMEMBRANE AND TPR REPEAT-CONTAINING PROTEIN 3-LIKE	TMTC3_HUMAN;TMTC3	TRANSMEMBRANE AND TPR REPEAT-CONTAINING PROTEIN 3, TRANSCRIPT VARIANT X1; TRANSMEMBRANE AND TPR REPEAT-CONTAINING PROTEIN 3, TRANSCRIPT VARIANT X4; TRANSMEMBRANE AND TPR REPEAT-CONTAINING PROTEIN 3, TRANSCRIPT VARIANT X2; TRANSMEMBRANE AND TPR REPEAT-CONTAINING PROTEIN 3, TRANSCRIPT VARIANT X3;TMTC3
3547	PORTHOMCL3547[AjBfCgCiDrGgLvMmOjOlPsSpXl|(17 genes, 13 taxa)]:	-0.506538	-0.165407	-0.125879	-0.0673039	-0.525172	-0.295382	-0.837494	0.407524	0.535059	-0.0615686	-0.585172	-0.280947	SUCLG2	SUCLG2	SUCLG2	SUCLG2.L;SUCLG2	SUCLA2;SUCLG2	SUCLG2	SUCCINATE--COA LIGASE [GDP-FORMING] SUBUNIT BETA, MITOCHONDRIAL;SODIUM- AND CHLORIDE-DEPENDENT GABA TRANSPORTER 3-LIKE, TRANSCRIPT VARIANT X2; SODIUM- AND CHLORIDE-DEPENDENT GABA TRANSPORTER 3-LIKE, TRANSCRIPT VARIANT X1;SODIUM- AND CHLORIDE-DEPENDENT GABA TRANSPORTER 1-LIKE;SODIUM- AND CHLORIDE-DEPENDENT CREATINE TRANSPORTER 1-LIKE;SUCLG2;SLC6A13	SUCLG2	S6A13_RAT	PUTATIVE SUCCINYL-COA LIGASE;SUCLG2	SUCB2_PIG;SUCLG2	SUCCINYL-COA LIGASE [GDP-FORMING] SUBUNIT BETA, MITOCHONDRIAL;SUCLG2
3570	PORTHOMCL3570[AjBfCgCiDrGgLvMmOjOlPsSpXl|(17 genes, 13 taxa)]:	-0.0534615	-0.60422	-0.540604	-0.0538725	-0.297647	-0.119706	-0.558584	-0.448277	-0.915618	-0.428751	-0.383333	-0.278252		WDR74	WDR74;GM45736	WDR74.L;WDR74	WDR74	WDR74	WD REPEAT-CONTAINING PROTEIN 74-LIKE, TRANSCRIPT VARIANT X2; WD REPEAT-CONTAINING PROTEIN 74-LIKE, TRANSCRIPT VARIANT X1; WD REPEAT-CONTAINING PROTEIN 74-LIKE, TRANSCRIPT VARIANT X3;WDR74	WDR74	WDR74_BOVIN	PUTATIVE WD REPEAT-CONTAINING PROTEIN 74 ISOFORM X2;WDR74	WDR74_BOVIN	WD REPEAT-CONTAINING PROTEIN 74;WDR74
3488	PORTHOMCL3488[AjBfCiDrGgMmOjOlPsXl|(17 genes, 10 taxa)]:	-0.200165	-0.107516	-0.616484	-0.170564	-0.0405882	-0.517118	-0.619571	-0.678716	-0.892941	0	0	-0.275406		ZNF687	ZFP592;ZFP687;ZNF592;ZNF687	ZNF592.L;LOC108699467;ZNF592.S;ZNF592	ZNF687A;ZNF532	ZNF592;ZNF687A	ZINC FINGER (C2H2)-99		ZN592_MOUSE	PUTATIVE ZINC FINGER PROTEIN
6123	PORTHOMCL6123[AjBfCgCiDrGgMmOjOlPsSpXl|(13 genes, 12 taxa)]:	-0.0285165	-0.465407	-0.122692	-0.598064	-0.169853	-0.251941	-0.568859	-0.772653	0.435971	0	0.326716	-0.272746	VPS25	VPS25	VPS25	LOC108702200;VPS25.L;VPS25	VPS25	VPS25	VACUOLAR PROTEIN-SORTING-ASSOCIATED PROTEIN 25-LIKE	VPS25	VPS25_DANRE;VPS25	PUTATIVE VACUOLAR PROTEIN-SORTING-ASSOCIATED PROTEIN 25		VACUOLAR PROTEIN-SORTING-ASSOCIATED PROTEIN 25;VPS25
5412	PORTHOMCL5412[AjBfCgCiDrGgLvMmOjOlPsSpXl|(14 genes, 13 taxa)]:	-0.445055	-0.392396	-0.407253	-0.135196	-0.138015	-0.0756765	-0.823065	0.397902	-0.508794	-0.763364	-0.6187	-0.265598	SDCCAG8	SDCCAG8	SDCCAG8	SCLT1.S	SDCCAG8	SDCCAG8	SEROLOGICALLY DEFINED COLON CANCER ANTIGEN 8 HOMOLOG		SDCG8_MOUSE	PUTATIVE SEROLOGICALLY DEFINED COLON CANCER ANTIGEN 8	SDCG8_MOUSE	SEROLOGICALLY DEFINED COLON CANCER ANTIGEN 8
11747	PORTHOMCL11747[DrGgMmOlPsXl|(7 genes, 6 taxa)]:	-0.117363	-0.400484	-0.182253	-0.11393	-0.324134	-0.452059	0	0	0	0	0	-0.265037	PKIG	PKIG	PKIG	PKIG.L;PKIG.S;PKIG	PKIG	PKIG
5196	PORTHOMCL5196[AjBfCgCiDrGgMmOjOlPsSpXl|(14 genes, 12 taxa)]:	-0.0469231	-0.190154	-0.368077	-0.6475	-0.140049	-0.193971	-0.313532	0.723007	-0.703882	0	-0.464461	-0.264446	PFDN2	PFDN2	PFDN2	PFDN2.S;PFDN2	PFDN2	PFDN2	PREFOLDIN SUBUNIT 2-LIKE;PFDN2	PFDN2	PFD2_HUMAN;PFDN2	PUTATIVE PREFOLDIN SUBUNIT 2;PFDN2		PREFOLDIN SUBUNIT 2;PFDN2
3890	PORTHOMCL3890[AjBfCgCiDrGgLvMmOjOlPsSpXl|(16 genes, 13 taxa)]:	-0.189615	-0.513846	-0.124121	-0.536324	-0.197181	-0.00705882	-0.891948	-0.876506	-0.847559	-0.743467	-0.636887	-0.261358	ARMC6	ARMC6	ARMC6	ARMC6.L;ARMC6	ARMC6	ARMC6	ARMADILLO REPEAT-CONTAINING PROTEIN 6, TRANSCRIPT VARIANT X1; ARMADILLO REPEAT-CONTAINING PROTEIN 6, TRANSCRIPT VARIANT X2;ARMC6	ARMC6	ARMC6_MOUSE;ARMC6	PUTATIVE ARMADILLO REPEAT-CONTAINING PROTEIN 6-LIKE;HYPOTHETICAL PROTEIN;ARMC6	ARMC6_MOUSE;ARMC6	ARMADILLO REPEAT-CONTAINING PROTEIN 6, TRANSCRIPT VARIANT X2; ARMADILLO REPEAT-CONTAINING PROTEIN 6, TRANSCRIPT VARIANT X1; ARMADILLO REPEAT-CONTAINING PROTEIN 6, TRANSCRIPT VARIANT X3; ARMADILLO REPEAT-CONTAINING PROTEIN 6, TRANSCRIPT VARIANT X4;ARMC6
13050	PORTHOMCL13050[DrGgMmOlPsXl|(6 genes, 6 taxa)]:	-0.586318	-0.152207	-0.130738	-0.0489489	-0.509627	-0.138378	0	0	0	0	0	-0.261036	MSGN1	MSGN1	MSGN1	MSGN1.L	MSGN1	MSGN1
3786	PORTHOMCL3786[AjBfCgCiDrGgLvMmOjOlPsSpXl|(16 genes, 13 taxa)]:	-0.0303846	-0.261758	-0.370769	-0.161054	-0.527475	-0.117618	-0.563688	-0.789785	-0.691735	-0.757606	-0.77549	-0.244843	DHDDS	DHDDS	DHDDS	DHDDS.L;DHDDS.S;DHDDS	DHDDS	DHDDS	DEHYDRODOLICHYL DIPHOSPHATE SYNTHASE COMPLEX SUBUNIT DHDDS-LIKE;DHDDS	DHDDS	DHDDS_HUMAN;DHDDS	PUTATIVE DEHYDRODOLICHYL DIPHOSPHATE SYNTASE COMPLEX SUBUNIT DHDDS;DHDDS	DHDDS_HUMAN;DHDDS	DEHYDRODOLICHYL DIPHOSPHATE SYNTASE COMPLEX SUBUNIT DHDDS;DHDDS
1482	PORTHOMCL1482[AjBfCgCiDrGgLvMmOjOlPsSpXl|(24 genes, 13 taxa)]:	-0.0681319	-0.0244835	-0.474176	-0.657034	-0.0923039	-0.0615294	-0.685818	-0.524167	0.249647	-0.737853	0.144942	-0.22961	UBR3	UBR3	UBR3	LOC108701846;UBR3	UBR3	UBR3	E3 UBIQUITIN-PROTEIN LIGASE UBR3		UBR3_HUMAN;UBR3_MOUSE	PUTATIVE E3 UBIQUITIN-PROTEIN LIGASE UBR3;PUTATIVE E3 UBIQUITIN-PROTEIN LIGASE UBR3-LIK E	UBR3_HUMAN	E3 UBIQUITIN-PROTEIN LIGASE UBR3
4222	PORTHOMCL4222[AjBfCgCiDrGgLvMmOjOlPsSpXl|(16 genes, 13 taxa)]:	-0.0813736	-0.307209	-0.474615	-0.0798529	-0.0971814	-0.314118	-0.747792	0.463427	-0.767235	-0.779814	-0.0716912	-0.225725	GOLGA1	GOLGA1	GOLGA1	GOLGA1.S;GOLGA1.L;GOLGA1	GOLGA1	GOLGA1	GOLGIN SUBFAMILY A MEMBER 1-LIKE		GOGA1_HUMAN	PUTATIVE GOLGIN SUBFAMILY A MEMBER 1 ISOFORM X1	GOGA1_MOUSE;GOGA1_HUMAN	GOLGIN SUBFAMILY A MEMBER 1, TRANSCRIPT VARIANT X1; GOLGIN SUBFAMILY A MEMBER 1, TRANSCRIPT VARIANT X3; GOLGIN SUBFAMILY A MEMBER 1, TRANSCRIPT VARIANT X2
3407	PORTHOMCL3407[AjBfCgCiDrGgMmOjOlPsSpXl|(17 genes, 12 taxa)]:	-0.220989	-0.624703	-0.088022	-0.188456	-0.00333333	-0.216	-0.866935	-0.418507	0.597546	0	0.170236	-0.223584	CLEC16A	CLEC16A	CLEC16A	CLEC16A.L;CLEC16A.S;CLEC16A	CLEC16A	CLEC16A	PROTEIN CLEC16A-LIKE, TRANSCRIPT VARIANT X3; PROTEIN CLEC16A-LIKE, TRANSCRIPT VARIANT X2; PROTEIN CLEC16A-LIKE, TRANSCRIPT VARIANT X1;CLEC16A			HYPOTHETICAL PROTEIN;CLEC16A		PROTEIN CLEC16A-LIKE
3523	PORTHOMCL3523[AjBfCgCiDrGgLvMmOjOlPsSpXl|(17 genes, 13 taxa)]:	-0.141538	-0.151297	-0.0404945	-0.649657	-0.102157	-0.190824	-0.648519	-0.692031	-0.911	-0.490237	-0.360662	-0.212661	PDCL3;PDCL2	PDCL3;PDCL2	PDCL3;PDCL2	PDCL3.S;PDCL3.L;PDCL3	PDCL3	PDCL3	PHOSDUCIN-LIKE PROTEIN 3;PDCL3	PDCL3	PDCL3_DANRE;PDCL3	PUTATIVE VIRAL IAP-ASSOCIATED FACTOR-LIKE ISOFORM X1;PDCL3	VIAF1_DROME;PDCL3	VIRAL IAP-ASSOCIATED FACTOR HOMOLOG, TRANSCRIPT VARIANT X1; VIRAL IAP-ASSOCIATED FACTOR HOMOLOG, TRANSCRIPT VARIANT X2
2642	PORTHOMCL2642[AjDrGgLvMmOjOlPsSpXl|(19 genes, 10 taxa)]:	-0.106703	-0.096	-0.0371429	-0.181606	-0.338306	-0.469949	0	0	-0.758324	-0.479819	0.269133	-0.204951	PAPPA	PAPPA;PAPPA2	PAPPA;PAPPA2	LOC108700041	PAPPAA;PAPPA2;PAPPA	PAPPAB;PAPPA2;PAPPAA;PAPPA			PAPP1_MOUSE	PUTATIVE PAPPALYSIN-1-LIKE;HYPOTHETICAL PROTEIN	PAPP1_HUMAN	PAPPALYSIN-1;PAPPALYSIN-1-LIKE;PAPPA2
1449	PORTHOMCL1449[AjBfCgCiDrGgLvMmOjOlPsSpXl|(25 genes, 13 taxa)]:	-0.140165	-0.359473	-0.179451	-0.0133088	-0.403995	-0.0256471	-0.315766	-0.123706	0.713647	0.215294	-0.2	-0.187006	GRB2	GRB2	GRB2	GRB2.S;GRB2.L;GRB2	GRB2B;GRB2	GRB2B;GRB2A;GRB2	PROTEIN ENHANCER OF SEVENLESS 2B;GROWTH FACTOR RECEPTOR-BOUND PROTEIN 2-LIKE;GRB2	GRB2	GRB2_MOUSE;GRAPL_HUMAN;GRB2	PUTATIVE GROWTH FACTOR RECEPTOR-BOUND PROTEIN 2;PUTATIVE GROWTH FACTOR RECEPTOR-BOUND PROTEIN 2-LIKE;GRB2	GRB2_RAT;DRK_DROSI;GRB2	PROTEIN ENHANCER OF SEVENLESS 2B;GROWTH FACTOR RECEPTOR-BOUND PROTEIN 2, TRANSCRIPT VARIANT X2; GROWTH FACTOR RECEPTOR-BOUND PROTEIN 2, TRANSCRIPT VARIANT X1; GROWTH FACTOR RECEPTOR-BOUND PROTEIN 2, TRANSCRIPT VARIANT X3;GRB2-RELATED ADAPTER PROTEIN-LIKE;GRB2
